# Supplementary material
Source: PubMed Central journal article supplement (PMC2808267)
Supplement: M800448-MCP200_1.pdf [file M800448-MCP200_1.pdf]

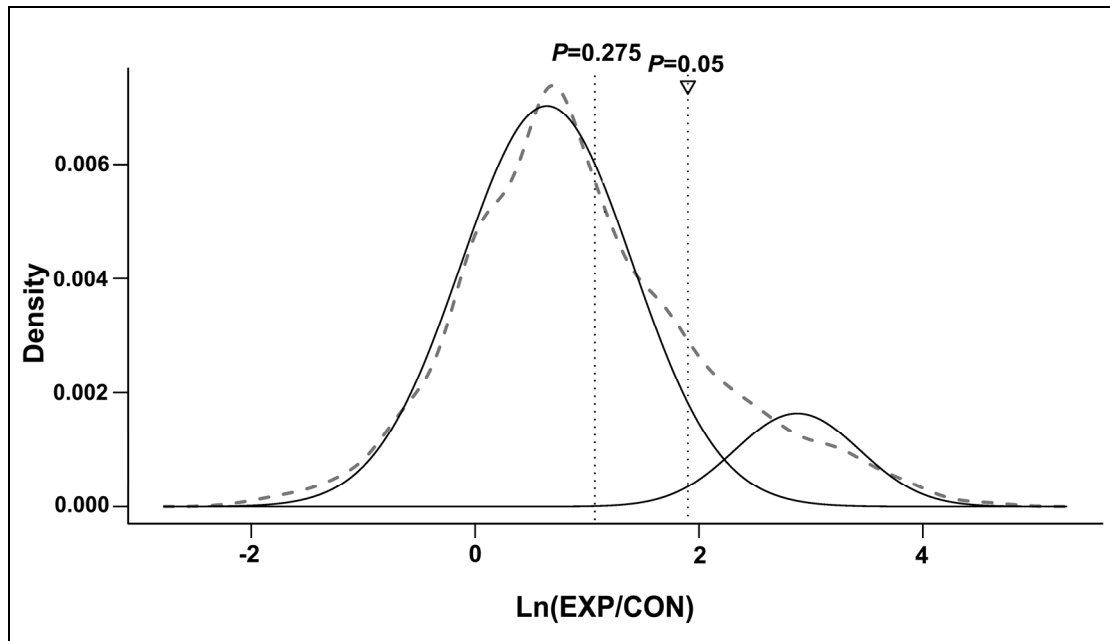

**Figure S1. Gaussian distribution of the log-ratios  $\ln(\text{EXP}/\text{CON})$  of proteins identified using the protein-based procedure.** The spectral counts were merged over all biological replicates and membrane domains prior to the imputation of missing values. Bayesian Information Criterion-based Gaussian Mixture modeling (ref. 26) suggested that the distribution of log-ratios (dashed line) comprises two Gaussian components (solid lines). The left Gaussian represents the log-ratio distribution of most contaminating proteins and some S-acylated proteins while the right Gaussian represents the log-ratio distribution of most S-acylated proteins and a small number of contaminants. The mean (standard deviation) values for the left and the right Gaussians are 0.64 (0.76) and 2.88 (0.56), respectively. To distinguish S-acylated proteins from contaminating proteins,  $p$ -values were calculated based on the distribution of the left Gaussian. Proteins with  $p < 0.05$  (corresponding to  $\text{EXP}/\text{CON} > 6.7$ ) were treated as significant and accepted as high-confidence S-acylated protein candidates while those with  $p$  values between 0.275 and 0.05 (corresponding to  $3.0 \leq \text{EXP}/\text{CON} \leq 6.7$ ) were considered as medium-confidence S-acylated protein candidates.

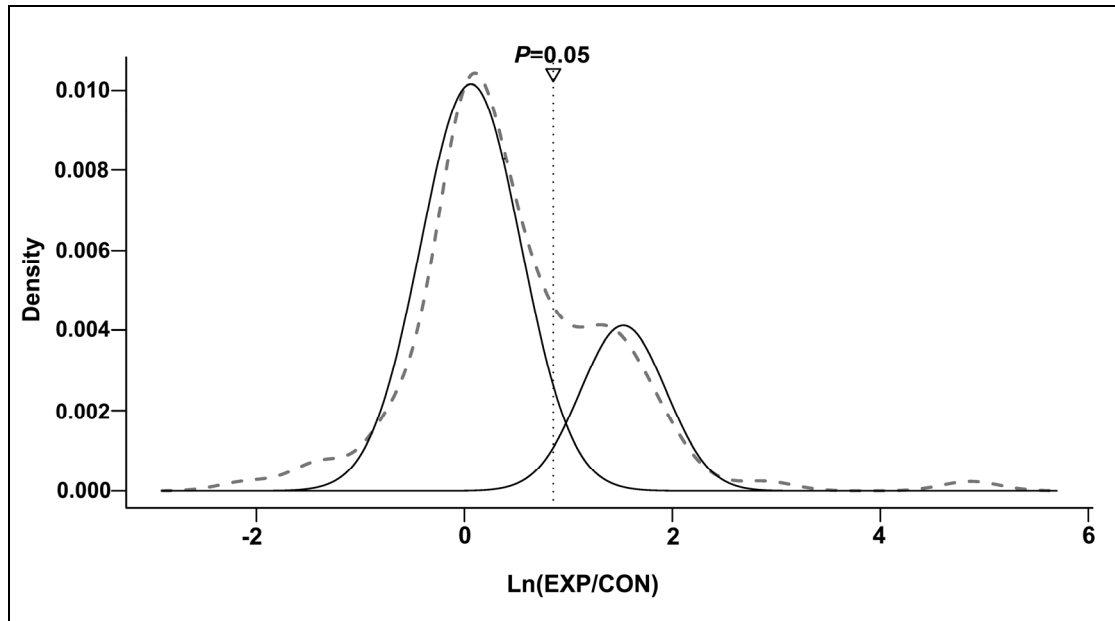

**Figure S2. Gaussian distribution of the log-ratios  $\ln(\text{EXP}/\text{CON})$  of peptides identified using the peptide-based procedure.** The spectral counts were merged over all biological and technical replicates as well as membrane domains. Bayesian Information Criterion-based Gaussian Mixture modeling (ref. 26) for the peptides with EXP and CON measurements (*i.e.*, spectral count  $\geq 1$  in both groups) suggested that the distribution of log-ratios (dashed line) comprises two Gaussian components (solid lines). The left Gaussian represents the log-ratio distribution of most contaminating peptides and some S-acylated peptides while the right Gaussian represents the log-ratio distribution of most S-acylated peptides and a small number of contaminants. To distinguish S-acylated peptides from contaminating peptides,  $p$ -values were calculated based on the distribution of the left Gaussian. Peptides with  $p < 0.05$  (corresponding to  $\text{EXP}/\text{CON} > 2.4$ ) were treated as significant and accepted as high-confidence S-acylated peptide candidates. The free cysteines on these candidates were considered as high-confidence candidate S-acylation sites.

**Figure S3. Representative tandem mass spectra for candidate S-acylated peptides.** See Table S5~S7 for more details about the identified peptides.

Gene Symbol

-

Sequences

MLITSQAMDILR**C**NPQK

m/z

495.28

Charge

4+

Ion score

59.3

(IPI00022913 PRO1575)

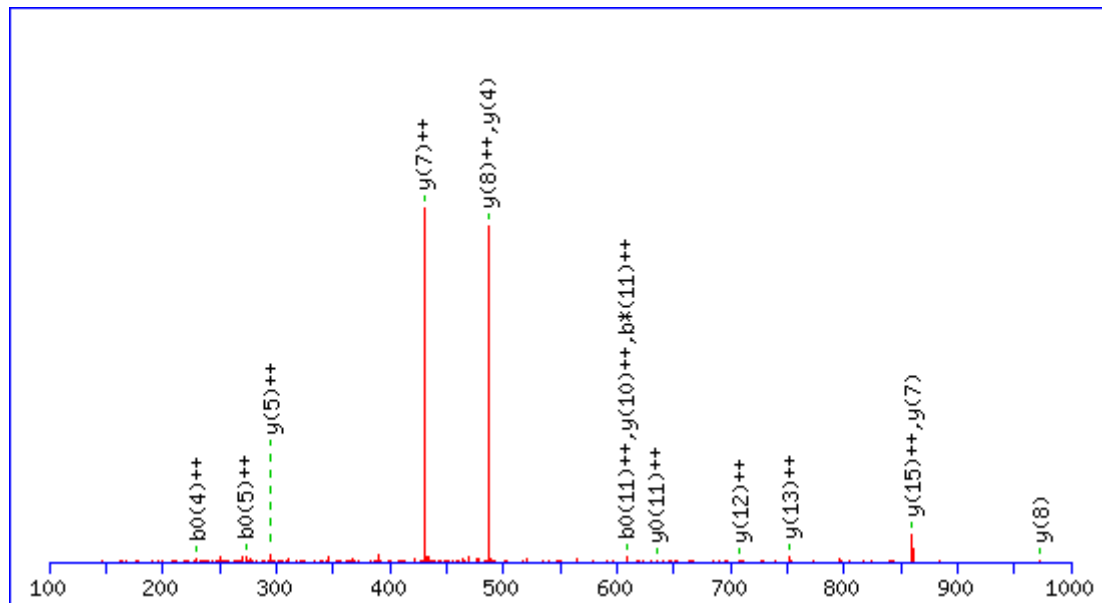

M1 : Oxidation (M)

| #  | b       | b <sup>++</sup> | b <sup>*</sup> | b <sup>*++</sup> | b <sup>0</sup> | b <sup>0++</sup> | Seq. | y             | y <sup>++</sup> | y <sup>*</sup> | y <sup>*++</sup> | y <sup>0</sup> | y <sup>0++</sup> | #  |
|----|---------|-----------------|----------------|------------------|----------------|------------------|------|---------------|-----------------|----------------|------------------|----------------|------------------|----|
| 1  | 148.20  | 74.61           |                |                  |                |                  | M    |               |                 |                |                  |                |                  | 17 |
| 2  | 261.36  | 131.18          |                |                  |                |                  | L    | 1832.17       | 916.59          | 1815.14        | 908.08           | 1814.16        | 907.58           | 16 |
| 3  | 374.52  | 187.76          |                |                  |                |                  | I    | 1719.02       | <b>860.01</b>   | 1701.99        | 851.50           | 1701.00        | 851.00           | 15 |
| 4  | 475.62  | 238.32          |                |                  | 457.61         | <b>229.31</b>    | T    | 1605.86       | 803.43          | 1588.83        | 794.92           | 1587.84        | 794.43           | 14 |
| 5  | 562.70  | 281.85          |                |                  | 544.68         | <b>272.85</b>    | S    | 1504.75       | <b>752.88</b>   | 1487.72        | 744.37           | 1486.74        | 743.87           | 13 |
| 6  | 690.83  | 345.92          | 673.80         | 337.40           | 672.81         | 336.91           | Q    | 1417.68       | <b>709.34</b>   | 1400.65        | 700.83           | 1399.66        | 700.33           | 12 |
| 7  | 761.91  | 381.46          | 744.88         | 372.94           | 743.89         | 372.45           | A    | 1289.55       | 645.28          | 1272.52        | 636.76           | 1271.53        | <b>636.27</b>    | 11 |
| 8  | 893.10  | 447.06          | 876.07         | 438.54           | 875.09         | 438.05           | M    | 1218.47       | <b>609.74</b>   | 1201.44        | 601.22           | 1200.45        | 600.73           | 10 |
| 9  | 1008.19 | 504.60          | 991.16         | 496.08           | 990.18         | 495.59           | D    | 1087.27       | 544.14          | 1070.24        | 535.63           | 1069.26        | 535.13           | 9  |
| 10 | 1121.35 | 561.18          | 1104.32        | 552.66           | 1103.33        | 552.17           | I    | <b>972.19</b> | <b>486.60</b>   | 955.16         | 478.08           |                |                  | 8  |
| 11 | 1234.51 | 617.76          | 1217.48        | <b>609.24</b>    | 1216.49        | <b>608.75</b>    | L    | <b>859.03</b> | <b>430.02</b>   | 842.00         | 421.50           |                |                  | 7  |
| 12 | 1390.69 | 695.85          | 1373.66        | 687.33           | 1372.68        | 686.84           | R    | 745.87        | 373.44          | 728.84         | 364.92           |                |                  | 6  |
| 13 | 1493.83 | 747.42          | 1476.80        | 738.91           | 1475.82        | 738.41           | C    | 589.69        | <b>295.35</b>   | 572.65         | 286.83           |                |                  | 5  |
| 14 | 1607.94 | 804.47          | 1590.91        | 795.96           | 1589.92        | 795.46           | N    | <b>486.54</b> | 243.78          | 469.51         | 235.26           |                |                  | 4  |
| 15 | 1705.05 | 853.03          | 1688.02        | 844.51           | 1687.04        | 844.02           | P    | 372.44        | 186.72          | 355.41         | 178.21           |                |                  | 3  |
| 16 | 1833.18 | 917.09          | 1816.15        | 908.58           | 1815.17        | 908.09           | Q    | 275.32        | 138.17          | 258.29         | 129.65           |                |                  | 2  |
| 17 |         |                 |                |                  |                |                  | K    | 147.20        | 74.10           | 130.16         | 65.59            |                |                  | 1  |

Gene Symbol

-

Sequences

KCLLLCQLR

m/z

601.63

Charge

2+

Ion score

65.5

(IPI00747966 Conserved hypothetical protein)

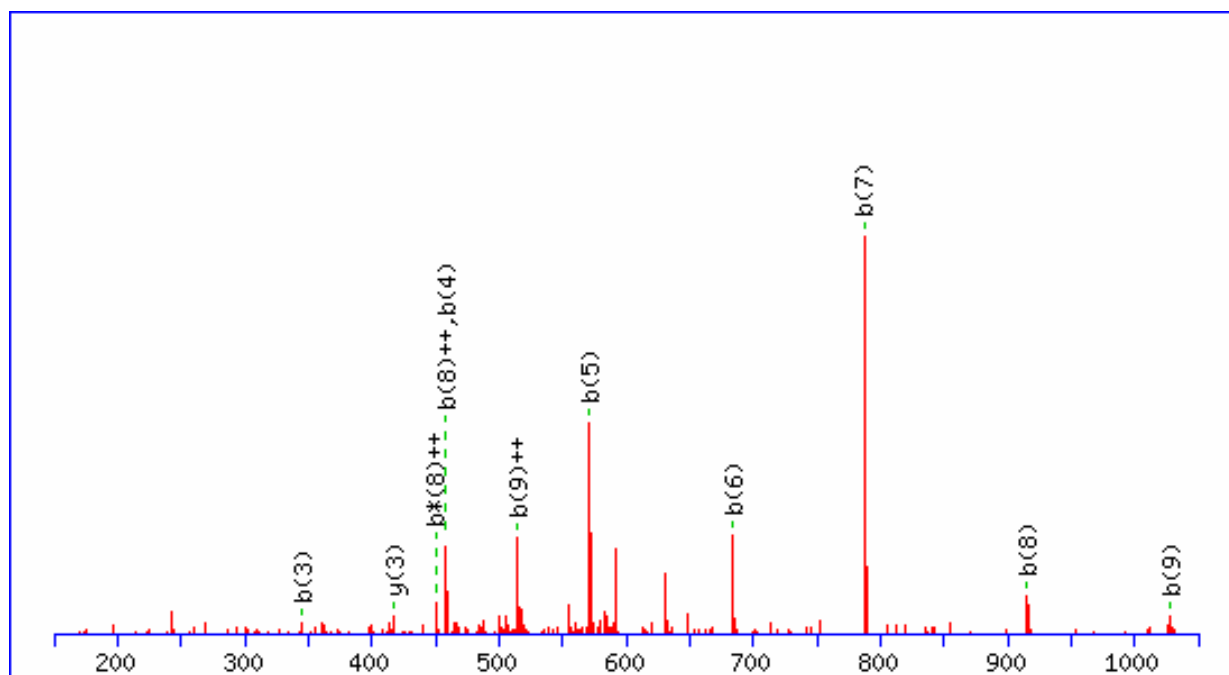

| #  | b       | b <sup>++</sup> | b <sup>*</sup> | b <sup>+++</sup> | Seq. | y       | y <sup>++</sup> | y <sup>*</sup> | y <sup>+++</sup> | #  |
|----|---------|-----------------|----------------|------------------|------|---------|-----------------|----------------|------------------|----|
| 1  | 129.18  | 65.09           | 112.15         | 56.58            | K    |         |                 |                |                  | 10 |
| 2  | 232.32  | 116.67          | 215.29         | 108.15           | C    | 1075.41 | 538.21          | 1058.38        | 529.69           | 9  |
| 3  | 345.48  | 173.24          | 328.45         | 164.73           | L    | 972.27  | 486.64          | 955.24         | 478.12           | 8  |
| 4  | 458.64  | 229.82          | 441.61         | 221.31           | L    | 859.11  | 430.06          | 842.08         | 421.54           | 7  |
| 5  | 571.80  | 286.40          | 554.77         | 277.89           | L    | 745.95  | 373.48          | 728.92         | 364.97           | 6  |
| 6  | 684.95  | 342.98          | 667.92         | 334.47           | L    | 632.80  | 316.90          | 615.77         | 308.39           | 5  |
| 7  | 788.10  | 394.55          | 771.07         | 386.04           | C    | 519.64  | 260.32          | 502.61         | 251.81           | 4  |
| 8  | 916.23  | 458.62          | 899.20         | 450.10           | Q    | 416.50  | 208.75          | 399.47         | 200.24           | 3  |
| 9  | 1029.38 | 515.20          | 1012.35        | 506.68           | L    | 288.37  | 144.69          | 271.34         | 136.17           | 2  |
| 10 |         |                 |                |                  | R    | 175.21  | 88.11           | 158.18         | 79.59            | 1  |

Gene Symbol ACTB/ACTG1 Sequences FRCPALFQPSFLGMES**C**GIHETTFNSIMK m/z 1183.39 Charge 3+ Ion score 115.6

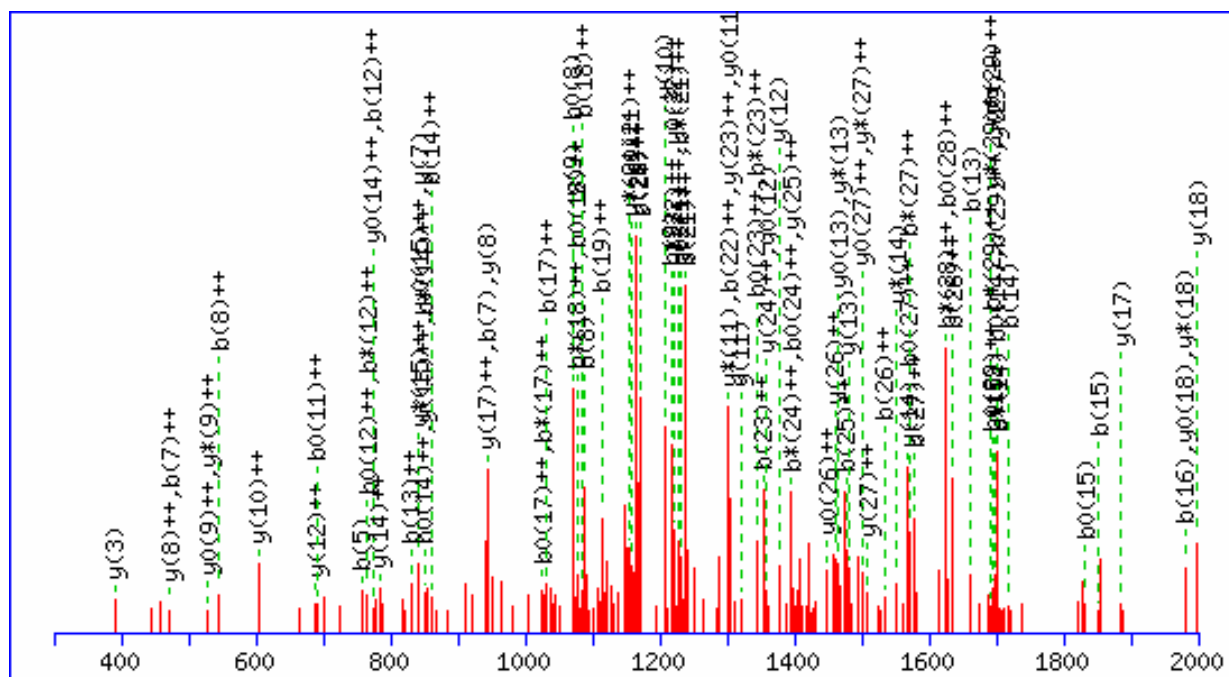

C3 : NEM (C)

| #  | b              | b <sup>++</sup> | b <sup>+</sup> | b <sup>+++</sup> | b <sup>0</sup> | b <sup>0++</sup> | Seq. | y              | y <sup>++</sup> | y <sup>+</sup> | y <sup>+++</sup> | y <sup>0</sup> | y <sup>0++</sup> | #  |
|----|----------------|-----------------|----------------|------------------|----------------|------------------|------|----------------|-----------------|----------------|------------------|----------------|------------------|----|
| 1  | 148.18         | 74.59           |                |                  |                |                  | F    |                |                 |                |                  |                |                  | 30 |
| 2  | 304.37         | 152.69          | 287.34         | 144.17           |                |                  | R    | 3400.90        | <b>1700.95</b>  | 3383.87        | <b>1692.44</b>   | 3382.89        | <b>1691.95</b>   | 29 |
| 3  | 532.64         | 266.82          | 515.61         | 258.31           |                |                  | C    | 3244.71        | 1622.86         | 3227.68        | 1614.35          | 3226.70        | 1613.85          | 28 |
| 4  | 629.75         | 315.38          | 612.72         | 306.86           |                |                  | P    | 3016.45        | <b>1508.73</b>  | 2999.42        | <b>1500.21</b>   | 2998.43        | <b>1499.72</b>   | 27 |
| 5  | <b>758.86</b>  | 379.94          | 741.83         | 371.42           | 740.85         | 370.93           | E    | 2919.33        | <b>1460.17</b>  | 2902.30        | 1451.65          | 2901.32        | <b>1451.16</b>   | 26 |
| 6  | 829.94         | 415.48          | 812.91         | 406.96           | 811.93         | 406.47           | A    | 2790.22        | <b>1395.61</b>  | 2773.19        | 1387.10          | 2772.20        | 1386.60          | 25 |
| 7  | <b>943.10</b>  | <b>472.05</b>   | 926.07         | 463.54           | 925.09         | 463.05           | L    | 2719.14        | <b>1360.07</b>  | 2702.11        | 1351.56          | 2701.12        | 1351.07          | 24 |
| 8  | <b>1090.27</b> | <b>545.64</b>   | 1073.24        | 537.13           | <b>1072.26</b> | 536.63           | F    | 2605.98        | <b>1303.49</b>  | 2588.95        | 1294.98          | 2587.97        | 1294.49          | 23 |
| 9  | <b>1218.40</b> | 609.71          | 1201.37        | 601.19           | 1200.39        | 600.70           | Q    | 2458.81        | <b>1229.91</b>  | 2441.78        | <b>1221.39</b>   | 2440.79        | <b>1220.90</b>   | 22 |
| 10 | 1315.52        | 658.26          | 1298.49        | 649.75           | 1297.50        | 649.26           | P    | 2330.68        | <b>1165.84</b>  | 2313.65        | <b>1157.33</b>   | 2312.66        | <b>1156.84</b>   | 21 |
| 11 | 1402.60        | 701.80          | 1385.57        | 693.29           | 1384.58        | <b>692.79</b>    | S    | 2233.56        | 1117.29         | 2216.53        | 1108.77          | 2215.55        | 1108.28          | 20 |
| 12 | 1549.77        | <b>775.39</b>   | 1532.74        | <b>766.87</b>    | 1531.75        | <b>766.38</b>    | F    | 2146.49        | 1073.75         | 2129.46        | 1065.23          | 2128.47        | 1064.74          | 19 |
| 13 | <b>1662.93</b> | <b>831.97</b>   | 1645.90        | 823.45           | 1644.91        | 822.96           | L    | <b>1999.31</b> | 1000.16         | <b>1982.28</b> | 991.64           | <b>1981.30</b> | 991.15           | 18 |
| 14 | <b>1719.98</b> | <b>860.49</b>   | <b>1702.95</b> | <b>851.98</b>    | <b>1701.96</b> | <b>851.49</b>    | G    | <b>1886.15</b> | <b>943.58</b>   | 1869.12        | 935.07           | 1868.14        | 934.57           | 17 |
| 15 | <b>1851.17</b> | 926.09          | 1834.14        | 917.58           | <b>1833.16</b> | 917.08           | M    | 1829.10        | 915.06          | 1812.07        | 906.54           | 1811.09        | 906.05           | 16 |
| 16 | <b>1980.29</b> | 990.65          | 1963.26        | 982.13           | 1962.27        | 981.64           | E    | <b>1697.91</b> | <b>849.46</b>   | 1680.88        | <b>840.94</b>    | 1679.89        | <b>840.45</b>    | 15 |
| 17 | 2067.37        | <b>1034.19</b>  | 2050.34        | <b>1025.67</b>   | 2049.35        | <b>1025.18</b>   | S    | <b>1568.79</b> | <b>784.90</b>   | <b>1551.76</b> | 776.39           | 1550.78        | <b>775.89</b>    | 14 |
| 18 | 2170.51        | <b>1085.76</b>  | 2153.48        | <b>1077.24</b>   | 2152.49        | <b>1076.75</b>   | C    | <b>1481.72</b> | 741.36          | <b>1464.69</b> | 732.85           | <b>1463.70</b> | 732.35           | 13 |
| 19 | 2227.56        | <b>1114.28</b>  | 2210.53        | 1105.77          | 2209.55        | 1105.28          | G    | <b>1378.57</b> | <b>689.79</b>   | 1361.54        | 681.28           | <b>1360.56</b> | 680.78           | 12 |
| 20 | 2340.72        | <b>1170.86</b>  | 2323.69        | 1162.35          | 2322.70        | 1161.86          | I    | <b>1321.52</b> | 661.26          | <b>1304.49</b> | 652.75           | <b>1303.51</b> | 652.26           | 11 |
| 21 | 2477.86        | <b>1239.43</b>  | 2460.83        | <b>1230.92</b>   | 2459.84        | <b>1230.43</b>   | H    | <b>1208.36</b> | <b>604.69</b>   | 1191.33        | 596.17           | 1190.35        | 595.68           | 10 |
| 22 | 2606.97        | <b>1303.99</b>  | 2589.94        | 1295.47          | 2588.96        | 1294.98          | E    | <b>1071.22</b> | 536.12          | 1054.19        | <b>527.60</b>    | 1053.21        | <b>527.11</b>    | 9  |
| 23 | 2708.08        | <b>1354.54</b>  | 2691.04        | <b>1346.03</b>   | 2690.06        | <b>1345.53</b>   | T    | <b>942.11</b>  | <b>471.56</b>   | 925.08         | 463.04           | 924.10         | 462.55           | 8  |
| 24 | 2809.18        | 1405.09         | 2792.15        | <b>1396.58</b>   | 2791.16        | <b>1396.09</b>   | T    | <b>841.01</b>  | 421.01          | 823.98         | 412.49           | 822.99         | 412.00           | 7  |
| 25 | 2956.35        | <b>1478.68</b>  | 2939.32        | 1470.17          | 2938.34        | 1469.67          | F    | 739.90         | 370.46          | 722.87         | 361.94           | 721.89         | 361.45           | 6  |
| 26 | 3070.46        | <b>1535.73</b>  | 3053.43        | 1527.22          | 3052.44        | 1526.72          | N    | 592.73         | 296.87          | 575.70         | 288.35           | 574.71         | 287.86           | 5  |
| 27 | 3157.53        | <b>1579.27</b>  | 3140.50        | <b>1570.76</b>   | 3139.52        | <b>1570.26</b>   | S    | 478.63         | 239.82          | 461.60         | 231.30           | 460.61         | 230.81           | 4  |
| 28 | 3270.69        | <b>1635.85</b>  | 3253.66        | <b>1627.33</b>   | 3252.68        | <b>1626.84</b>   | I    | <b>391.55</b>  | 196.28          | 374.52         | 187.76           |                |                  | 3  |
| 29 | 3401.89        | <b>1701.45</b>  | 3384.86        | <b>1692.93</b>   | 3383.87        | <b>1692.44</b>   | M    | 278.39         | 139.70          | 261.36         | 131.18           |                |                  | 2  |
| 30 |                |                 |                |                  |                |                  | K    | 147.20         | 74.10           | 130.17         | 65.59            |                |                  | 1  |

Gene Symbol  
ACTN4

Sequences  
CQLEINFNTLQTK

m/z  
776.70

Charge  
2+

Ion score  
97.1

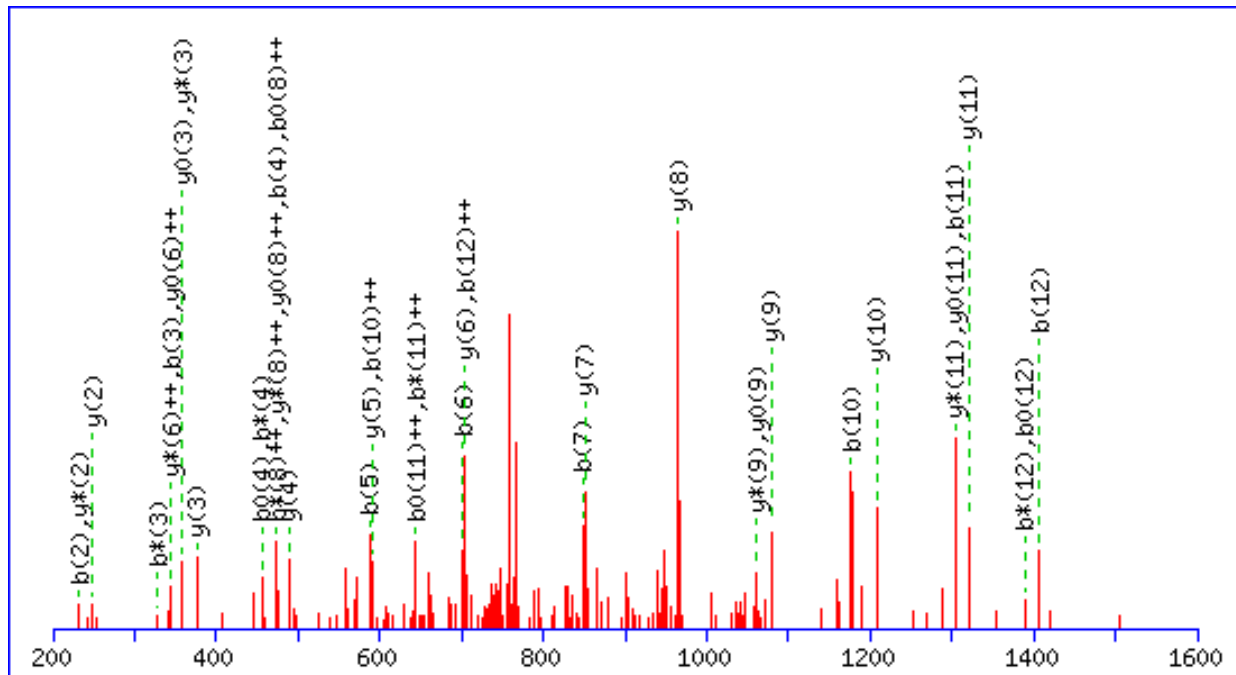

| #  | b       | b <sup>++</sup> | b <sup>*</sup> | b <sup>+++</sup> | b <sup>0</sup> | b <sup>0++</sup> | Seq. | y       | y <sup>++</sup> | y <sup>*</sup> | y <sup>+++</sup> | y <sup>0</sup> | y <sup>0++</sup> | #  |
|----|---------|-----------------|----------------|------------------|----------------|------------------|------|---------|-----------------|----------------|------------------|----------------|------------------|----|
| 1  | 104.15  | 52.58           |                |                  |                |                  | C    |         |                 |                |                  |                |                  | 13 |
| 2  | 232.28  | 116.64          | 215.25         | 108.13           |                |                  | Q    | 1449.63 | 725.32          | 1432.60        | 716.80           | 1431.61        | 716.31           | 12 |
| 3  | 345.44  | 173.22          | 328.41         | 164.71           |                |                  | L    | 1321.50 | 661.25          | 1304.47        | 652.74           | 1303.48        | 652.25           | 11 |
| 4  | 474.55  | 237.78          | 457.52         | 229.26           | 456.54         | 228.77           | E    | 1208.34 | 604.67          | 1191.31        | 596.16           | 1190.33        | 595.67           | 10 |
| 5  | 587.71  | 294.36          | 570.68         | 285.84           | 569.69         | 285.35           | I    | 1079.23 | 540.12          | 1062.20        | 531.60           | 1061.21        | 531.11           | 9  |
| 6  | 701.81  | 351.41          | 684.78         | 342.89           | 683.80         | 342.40           | N    | 966.07  | 483.54          | 949.04         | 475.02           | 948.05         | 474.53           | 8  |
| 7  | 848.99  | 425.00          | 831.96         | 416.48           | 830.97         | 415.99           | F    | 851.97  | 426.49          | 834.94         | 417.97           | 833.95         | 417.48           | 7  |
| 8  | 963.09  | 482.05          | 946.06         | 473.53           | 945.07         | 473.04           | N    | 704.79  | 352.90          | 687.76         | 344.39           | 686.78         | 343.89           | 6  |
| 9  | 1064.19 | 532.60          | 1047.16        | 524.08           | 1046.18        | 523.59           | T    | 590.69  | 295.85          | 573.66         | 287.33           | 572.67         | 286.84           | 5  |
| 10 | 1177.35 | 589.18          | 1160.32        | 580.66           | 1159.33        | 580.17           | L    | 489.59  | 245.30          | 472.56         | 236.78           | 471.57         | 236.29           | 4  |
| 11 | 1305.48 | 653.24          | 1288.45        | 644.73           | 1287.46        | 644.24           | Q    | 376.43  | 188.72          | 359.40         | 180.20           | 358.41         | 179.71           | 3  |
| 12 | 1406.58 | 703.80          | 1389.55        | 695.28           | 1388.57        | 694.79           | T    | 248.30  | 124.65          | 231.27         | 116.14           | 230.28         | 115.65           | 2  |
| 13 |         |                 |                |                  |                |                  | K    | 147.20  | 74.10           | 130.16         | 65.59            |                |                  | 1  |

Gene Symbol  
ADCY3

Sequences  
NSGSCLCLPR

m/z  
525.54

Charge  
2+

Ion score  
75.1

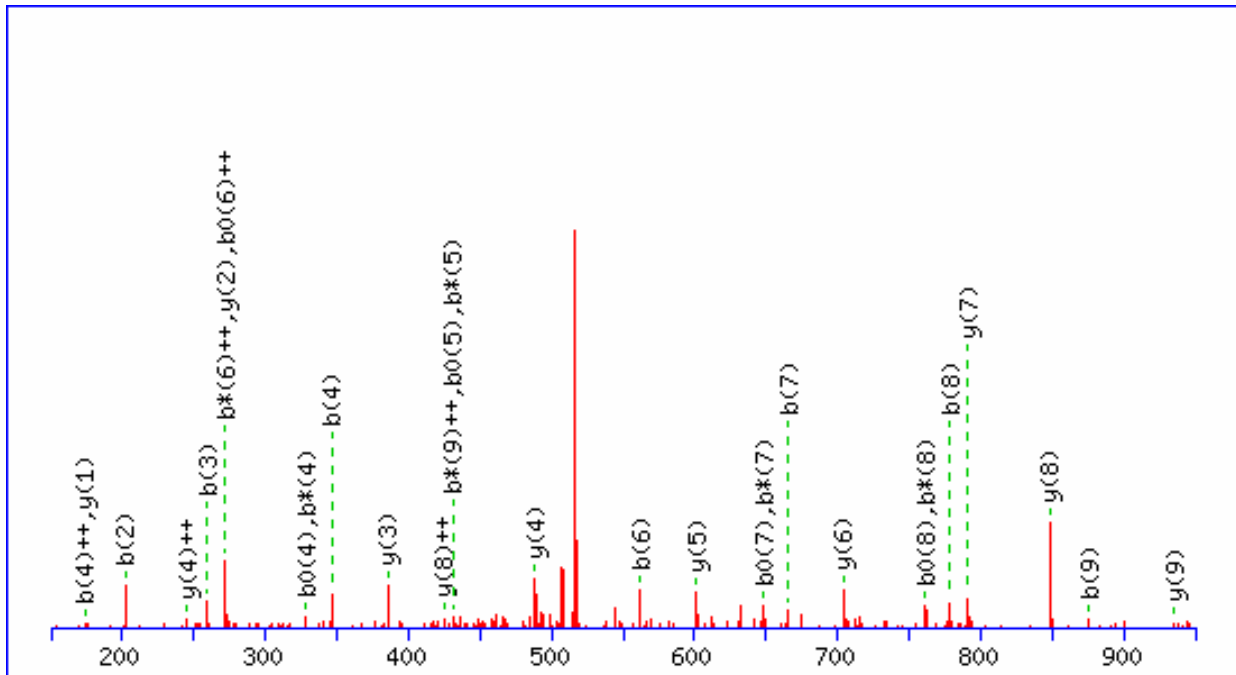

| #  | b             | b <sup>++</sup> | b <sup>*</sup> | b <sup>***</sup> | b <sup>0</sup> | b <sup>0++</sup> | Seq. | y             | y <sup>++</sup> | y <sup>*</sup> | y <sup>***</sup> | y <sup>0</sup> | y <sup>0++</sup> | #  |
|----|---------------|-----------------|----------------|------------------|----------------|------------------|------|---------------|-----------------|----------------|------------------|----------------|------------------|----|
| 1  | 115.11        | 58.06           | 98.08          | 49.54            |                |                  | N    |               |                 |                |                  |                |                  | 10 |
| 2  | <b>202.19</b> | 101.60          | 185.16         | 93.08            | 184.17         | 92.59            | S    | <b>936.13</b> | 468.57          | 919.10         | 460.05           | 918.12         | 459.56           | 9  |
| 3  | <b>259.24</b> | 130.12          | 242.21         | 121.61           | 241.22         | 121.12           | G    | <b>849.05</b> | <b>425.03</b>   | 832.02         | 416.52           | 831.04         | 416.02           | 8  |
| 4  | <b>346.32</b> | <b>173.66</b>   | <b>329.29</b>  | 165.15           | <b>328.30</b>  | 164.65           | S    | <b>792.00</b> | 396.51          | 774.97         | 387.99           | 773.99         | 387.50           | 7  |
| 5  | 449.46        | 225.23          | <b>432.43</b>  | 216.72           | <b>431.44</b>  | 216.23           | C    | <b>704.93</b> | 352.97          | 687.89         | 344.45           |                |                  | 6  |
| 6  | <b>562.62</b> | 281.81          | 545.59         | <b>273.30</b>    | 544.60         | <b>272.80</b>    | L    | <b>601.78</b> | 301.40          | 584.75         | 292.88           |                |                  | 5  |
| 7  | <b>665.76</b> | 333.38          | <b>648.73</b>  | 324.87           | <b>647.74</b>  | 324.38           | C    | <b>488.62</b> | <b>244.82</b>   | 471.59         | 236.30           |                |                  | 4  |
| 8  | <b>778.92</b> | 389.96          | <b>761.89</b>  | 381.45           | <b>760.90</b>  | 380.96           | L    | <b>385.48</b> | 193.24          | 368.45         | 184.73           |                |                  | 3  |
| 9  | <b>876.03</b> | 438.52          | 859.00         | <b>430.01</b>    | 858.02         | 429.51           | P    | <b>272.32</b> | 136.67          | 255.29         | 128.15           |                |                  | 2  |
| 10 |               |                 |                |                  |                |                  | R    | <b>175.21</b> | 88.11           | 158.18         | 79.59            |                |                  | 1  |



Gene Symbol  
ADORA1

Sequences  
CQPAPPIDEDLPEERPDD

m/z  
1019.08

Charge  
2+

Ion score  
74.7

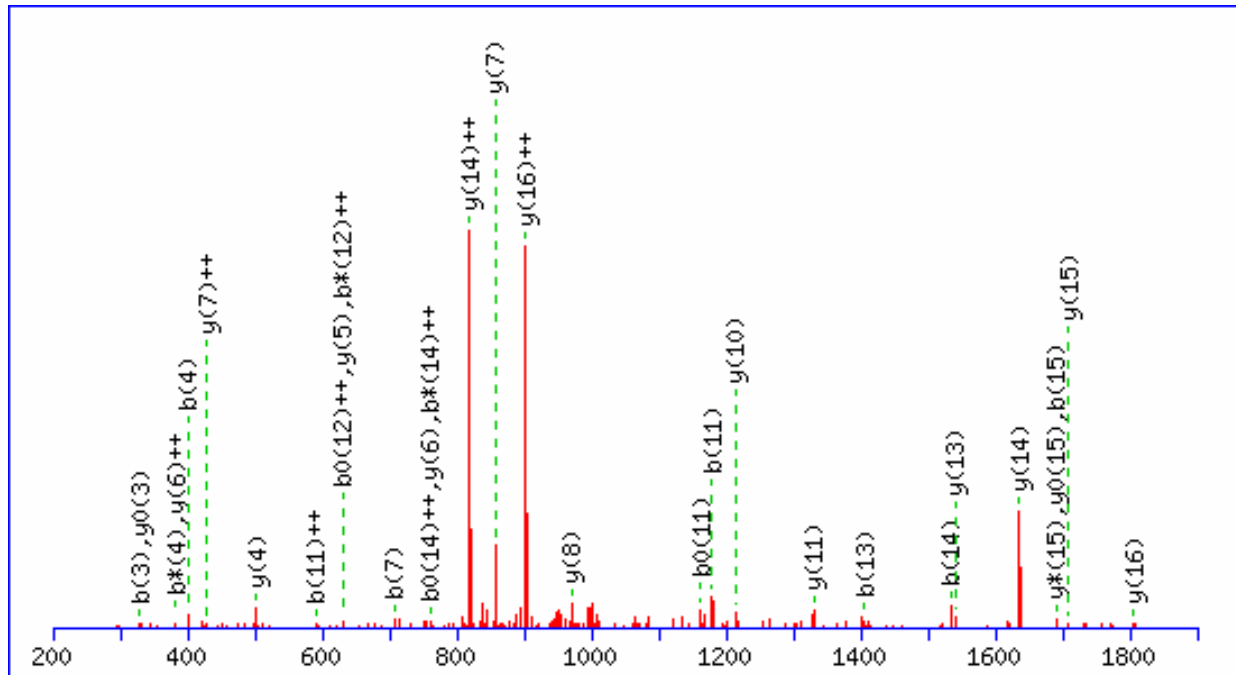

| #  | b              | b <sup>++</sup> | b <sup>*</sup> | b <sup>+++</sup> | b <sup>0</sup> | b <sup>0++</sup> | Seq. | y              | y <sup>++</sup> | y <sup>*</sup> | y <sup>+++</sup> | y <sup>0</sup> | y <sup>0++</sup> | #  |
|----|----------------|-----------------|----------------|------------------|----------------|------------------|------|----------------|-----------------|----------------|------------------|----------------|------------------|----|
| 1  | 104.15         | 52.58           |                |                  |                |                  | C    |                |                 |                |                  |                |                  | 18 |
| 2  | 232.28         | 116.64          | 215.25         | 108.13           |                |                  | Q    | 1934.00        | 967.50          | 1916.97        | 958.99           | 1915.98        | 958.50           | 17 |
| 3  | <b>329.40</b>  | 165.20          | 312.36         | 156.69           |                |                  | P    | <b>1805.87</b> | <b>903.44</b>   | 1788.84        | 894.92           | 1787.85        | 894.43           | 16 |
| 4  | <b>400.47</b>  | 200.74          | <b>383.44</b>  | 192.23           |                |                  | A    | <b>1708.75</b> | 854.88          | <b>1691.72</b> | 846.37           | <b>1690.74</b> | 845.87           | 15 |
| 5  | 497.59         | 249.30          | 480.56         | 240.78           |                |                  | P    | <b>1637.68</b> | <b>819.34</b>   | 1620.65        | 810.83           | 1619.66        | 810.33           | 14 |
| 6  | 594.70         | 297.86          | 577.67         | 289.34           |                |                  | P    | <b>1540.56</b> | 770.78          | 1523.53        | 762.27           | 1522.55        | 761.78           | 13 |
| 7  | <b>707.86</b>  | 354.43          | 690.83         | 345.92           |                |                  | I    | 1443.45        | 722.23          | 1426.42        | 713.71           | 1425.43        | 713.22           | 12 |
| 8  | 822.95         | 411.98          | 805.92         | 403.46           | 804.93         | 402.97           | D    | <b>1330.29</b> | 665.65          | 1313.26        | 657.13           | 1312.27        | 656.64           | 11 |
| 9  | 952.06         | 476.54          | 935.03         | 468.02           | 934.05         | 467.53           | E    | <b>1215.20</b> | 608.10          | 1198.17        | 599.59           | 1197.19        | 599.10           | 10 |
| 10 | 1067.15        | 534.08          | 1050.12        | 525.56           | 1049.13        | 525.07           | D    | 1086.09        | 543.55          | 1069.06        | 535.03           | 1068.07        | 534.54           | 9  |
| 11 | <b>1180.31</b> | <b>590.66</b>   | 1163.28        | 582.14           | <b>1162.29</b> | 581.65           | L    | <b>971.00</b>  | 486.00          | 953.97         | 477.49           | 952.98         | 477.00           | 8  |
| 12 | 1277.42        | 639.22          | 1260.39        | <b>630.70</b>    | 1259.41        | <b>630.21</b>    | P    | <b>857.84</b>  | <b>429.43</b>   | 840.81         | 420.91           | 839.83         | 420.42           | 7  |
| 13 | <b>1406.54</b> | 703.77          | 1389.51        | 695.26           | 1388.52        | 694.76           | E    | <b>760.73</b>  | <b>380.87</b>   | 743.70         | 372.35           | 742.71         | 371.86           | 6  |
| 14 | <b>1535.65</b> | 768.33          | 1518.62        | <b>759.81</b>    | 1517.64        | <b>759.32</b>    | E    | <b>631.61</b>  | 316.31          | 614.58         | 307.80           | 613.60         | 307.30           | 5  |
| 15 | <b>1691.84</b> | 846.42          | 1674.81        | 837.91           | 1673.82        | 837.41           | R    | <b>502.50</b>  | 251.75          | 485.47         | 243.24           | 484.48         | 242.75           | 4  |
| 16 | 1788.95        | 894.98          | 1771.92        | 886.46           | 1770.94        | 885.97           | P    | 346.31         | 173.66          |                |                  | <b>328.30</b>  | 164.65           | 3  |
| 17 | 1904.04        | 952.52          | 1887.01        | 944.01           | 1886.02        | 943.52           | D    | 249.20         | 125.10          |                |                  | 231.18         | 116.10           | 2  |
| 18 |                |                 |                |                  |                |                  | D    | 134.11         | 67.56           |                |                  | 116.10         | 58.55            | 1  |

Gene Symbol  
AHNAK

Sequences  
SSGCDVNLPGVNVKLPQTQISGPEIK

m/z  
870.72

Charge  
3+

Ion score  
66.1

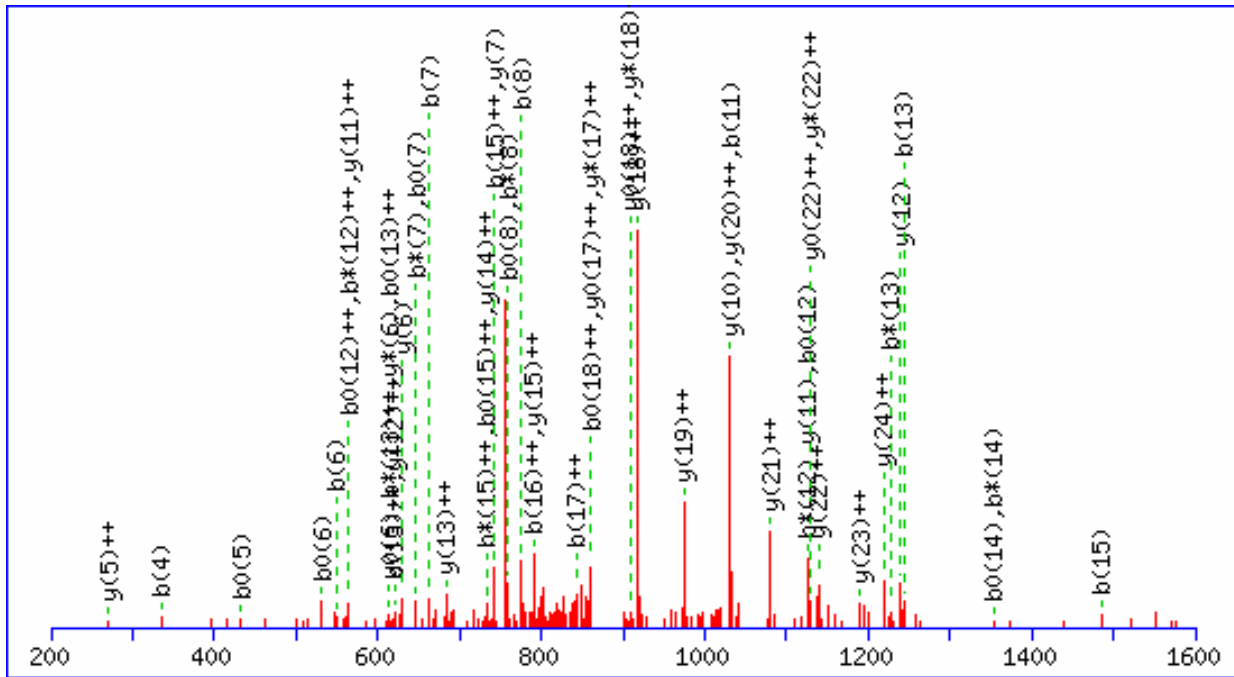

| #  | b              | b <sup>++</sup> | b <sup>+</sup> | b <sup>+-</sup> | b <sup>0</sup> | b <sup>0+-</sup> | Seq. | y              | y <sup>++</sup> | y <sup>+</sup> | y <sup>+-</sup> | y <sup>0</sup> | y <sup>0+-</sup> | #  |
|----|----------------|-----------------|----------------|-----------------|----------------|------------------|------|----------------|-----------------|----------------|-----------------|----------------|------------------|----|
| 1  | 88.09          | 44.55           |                |                 | 70.07          | 35.54            | S    |                |                 |                |                 |                |                  | 26 |
| 2  | 175.16         | 88.09           |                |                 | 157.15         | 79.08            | S    | 2523.88        | 1262.44         | 2506.85        | 1253.93         | 2505.86        | 1253.44          | 25 |
| 3  | 232.21         | 116.61          |                |                 | 214.20         | 107.60           | G    | 2436.80        | <b>1218.91</b>  | 2419.77        | 1210.39         | 2418.79        | 1209.90          | 24 |
| 4  | <b>335.36</b>  | 168.18          |                |                 | 317.34         | 159.17           | C    | 2379.75        | <b>1190.38</b>  | 2362.72        | 1181.86         | 2361.74        | 1181.37          | 23 |
| 5  | 450.44         | 225.73          |                |                 | <b>432.43</b>  | 216.72           | D    | 2276.61        | <b>1138.81</b>  | 2259.58        | <b>1130.29</b>  | 2258.59        | <b>1129.80</b>   | 22 |
| 6  | <b>549.58</b>  | 275.29          |                |                 | <b>531.56</b>  | 266.28           | V    | 2161.52        | <b>1081.26</b>  | 2144.49        | 1072.75         | 2143.51        | 1072.26          | 21 |
| 7  | <b>663.68</b>  | 332.34          | <b>646.65</b>  | 323.83          | <b>645.66</b>  | 323.34           | N    | 2062.39        | <b>1031.70</b>  | 2045.36        | 1023.18         | 2044.37        | 1022.69          | 20 |
| 8  | <b>776.84</b>  | 388.92          | <b>759.80</b>  | 380.41          | <b>758.82</b>  | 379.91           | L    | 1948.29        | <b>974.65</b>   | 1931.26        | 966.13          | 1930.27        | 965.64           | 19 |
| 9  | 873.95         | 437.48          | 856.92         | 428.96          | 855.94         | 428.47           | P    | 1835.13        | <b>918.07</b>   | 1818.10        | <b>909.55</b>   | 1817.11        | <b>909.06</b>    | 18 |
| 10 | 931.00         | 466.00          | 913.97         | 457.49          | 912.99         | 457.00           | G    | 1738.01        | 869.51          | 1720.98        | <b>861.00</b>   | 1720.00        | <b>860.50</b>    | 17 |
| 11 | <b>1030.13</b> | 515.57          | 1013.10        | 507.06          | 1012.12        | 506.56           | V    | 1680.96        | 840.99          | 1663.93        | 832.47          | 1662.95        | 831.98           | 16 |
| 12 | 1144.24        | 572.62          | <b>1127.21</b> | <b>564.11</b>   | <b>1126.22</b> | <b>563.61</b>    | N    | 1581.83        | <b>791.42</b>   | 1564.80        | 782.90          | 1563.82        | 782.41           | 15 |
| 13 | <b>1243.37</b> | <b>622.19</b>   | <b>1226.34</b> | <b>613.67</b>   | 1225.35        | <b>613.18</b>    | V    | 1467.73        | <b>734.37</b>   | 1450.70        | 725.85          | 1449.71        | 725.36           | 14 |
| 14 | 1371.54        | 686.27          | <b>1354.51</b> | 677.76          | <b>1353.52</b> | 677.27           | K    | 1368.60        | <b>684.80</b>   | 1351.57        | 676.29          | 1350.58        | 675.80           | 13 |
| 15 | <b>1484.70</b> | <b>742.85</b>   | 1467.67        | <b>734.34</b>   | 1466.68        | <b>733.84</b>    | L    | <b>1240.43</b> | <b>620.72</b>   | 1223.40        | 612.20          | 1222.41        | 611.71           | 12 |
| 16 | 1581.81        | <b>791.41</b>   | 1564.78        | 782.89          | 1563.80        | 782.40           | P    | <b>1127.27</b> | <b>564.14</b>   | 1110.24        | 555.62          | 1109.25        | 555.13           | 11 |
| 17 | 1682.92        | <b>841.96</b>   | 1665.89        | 833.45          | 1664.90        | 832.95           | T    | <b>1030.15</b> | 515.58          | 1013.12        | 507.07          | 1012.14        | 506.57           | 10 |
| 18 | 1739.97        | 870.49          | 1722.94        | 861.97          | 1721.95        | <b>861.48</b>    | G    | 929.05         | 465.03          | 912.02         | 456.51          | 911.03         | 456.02           | 9  |
| 19 | 1868.10        | 934.55          | 1851.07        | 926.04          | 1850.08        | 925.54           | Q    | 872.00         | 436.50          | 854.97         | 427.99          | 853.98         | 427.50           | 8  |
| 20 | 1981.25        | 991.13          | 1964.22        | 982.62          | 1963.24        | 982.12           | I    | <b>743.87</b>  | 372.44          | 726.84         | 363.92          | 725.85         | 363.43           | 7  |
| 21 | 2068.33        | 1034.67         | 2051.30        | 1026.15         | 2050.32        | 1025.66          | S    | <b>630.71</b>  | 315.86          | <b>613.68</b>  | 307.34          | <b>612.70</b>  | 306.85           | 6  |
| 22 | 2125.38        | 1063.20         | 2108.35        | 1054.68         | 2107.37        | 1054.19          | G    | 543.63         | <b>272.32</b>   | 526.60         | 263.81          | 525.62         | 263.31           | 5  |
| 23 | 2222.50        | 1111.75         | 2205.47        | 1103.24         | 2204.48        | 1102.75          | P    | 486.58         | 243.80          | 469.55         | 235.28          | 468.57         | 234.79           | 4  |
| 24 | 2351.61        | 1176.31         | 2334.58        | 1167.79         | 2333.60        | 1167.30          | E    | 389.47         | 195.24          | 372.44         | 186.72          | 371.45         | 186.23           | 3  |
| 25 | 2464.77        | 1232.89         | 2447.74        | 1224.37         | 2446.75        | 1223.88          | I    | 260.35         | 130.68          | 243.32         | 122.17          |                |                  | 2  |
| 26 |                |                 |                |                 |                |                  | K    | 147.20         | 74.10           | 130.17         | 65.59           |                |                  | 1  |

Gene Symbol  
ANLN

Sequences  
SCEGQNPPELLPK

m/z  
657.95

Charge  
2+

Ion score  
56.0

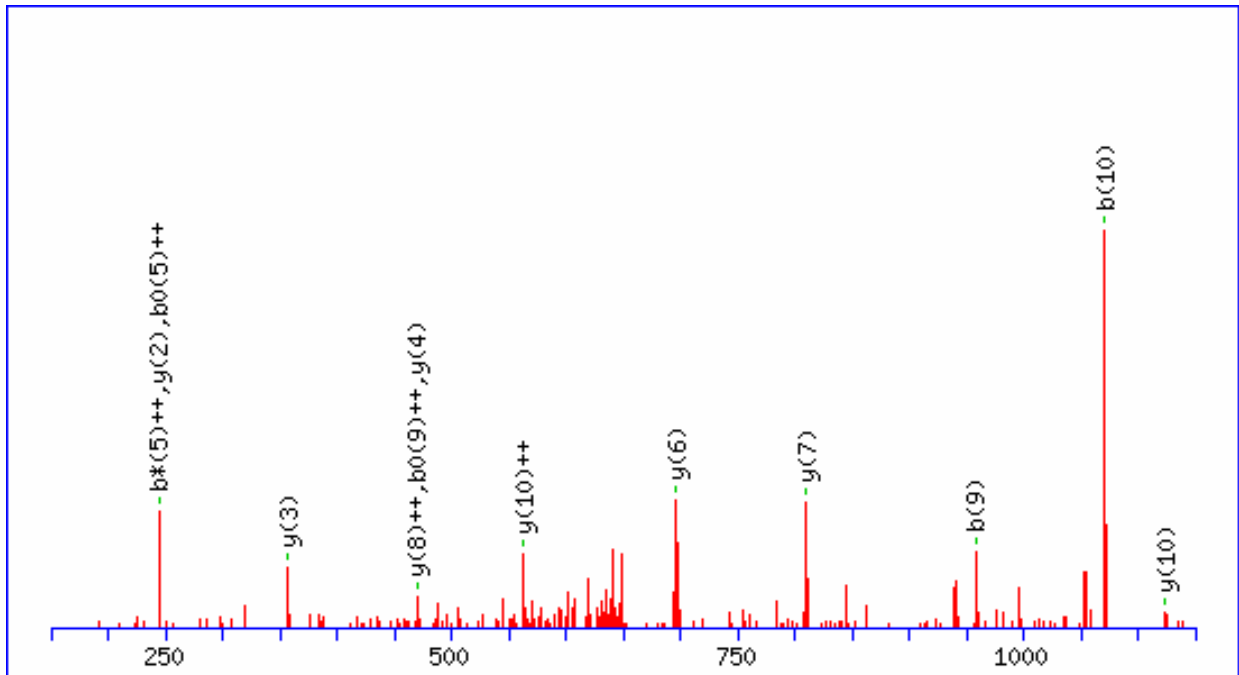

| #  | b       | b <sup>++</sup> | b <sup>*</sup> | b <sup>+++</sup> | b <sup>0</sup> | b <sup>0++</sup> | Seq. | y       | y <sup>++</sup> | y <sup>*</sup> | y <sup>+++</sup> | y <sup>0</sup> | y <sup>0++</sup> | #  |
|----|---------|-----------------|----------------|------------------|----------------|------------------|------|---------|-----------------|----------------|------------------|----------------|------------------|----|
| 1  | 88.09   | 44.55           |                |                  | 70.07          | 35.54            | S    |         |                 |                |                  |                |                  | 12 |
| 2  | 191.23  | 96.12           |                |                  | 173.21         | 87.11            | C    | 1228.40 | 614.70          | 1211.36        | 606.19           | 1210.38        | 605.69           | 11 |
| 3  | 320.34  | 160.68          |                |                  | 302.33         | 151.67           | E    | 1125.25 | 563.13          | 1108.22        | 554.61           | 1107.24        | 554.12           | 10 |
| 4  | 377.39  | 189.20          |                |                  | 359.38         | 180.19           | G    | 996.14  | 498.57          | 979.11         | 490.06           | 978.12         | 489.57           | 9  |
| 5  | 505.52  | 253.27          | 488.49         | 244.75           | 487.51         | 244.26           | Q    | 939.09  | 470.05          | 922.06         | 461.53           | 921.07         | 461.04           | 8  |
| 6  | 619.63  | 310.32          | 602.59         | 301.80           | 601.61         | 301.31           | N    | 810.96  | 405.98          | 793.93         | 397.47           | 792.94         | 396.98           | 7  |
| 7  | 716.74  | 358.87          | 699.71         | 350.36           | 698.73         | 349.87           | P    | 696.86  | 348.93          | 679.82         | 340.42           | 678.84         | 339.92           | 6  |
| 8  | 845.85  | 423.43          | 828.82         | 414.92           | 827.84         | 414.42           | E    | 599.74  | 300.37          | 582.71         | 291.86           | 581.72         | 291.37           | 5  |
| 9  | 959.01  | 480.01          | 941.98         | 471.49           | 941.00         | 471.00           | L    | 470.63  | 235.82          | 453.60         | 227.30           |                |                  | 4  |
| 10 | 1072.17 | 536.59          | 1055.14        | 528.07           | 1054.15        | 527.58           | L    | 357.47  | 179.24          | 340.44         | 170.72           |                |                  | 3  |
| 11 | 1169.28 | 585.15          | 1152.25        | 576.63           | 1151.27        | 576.14           | P    | 244.31  | 122.66          | 227.28         | 114.14           |                |                  | 2  |
| 12 |         |                 |                |                  |                |                  | K    | 147.20  | 74.10           | 130.16         | 65.59            |                |                  | 1  |

| Gene Symbol | Sequences         | m/z    | Charge | Ion score |
|-------------|-------------------|--------|--------|-----------|
| ATP11A      | MDC <u>CS</u> LVR | 433.33 | 2+     | 57.4      |

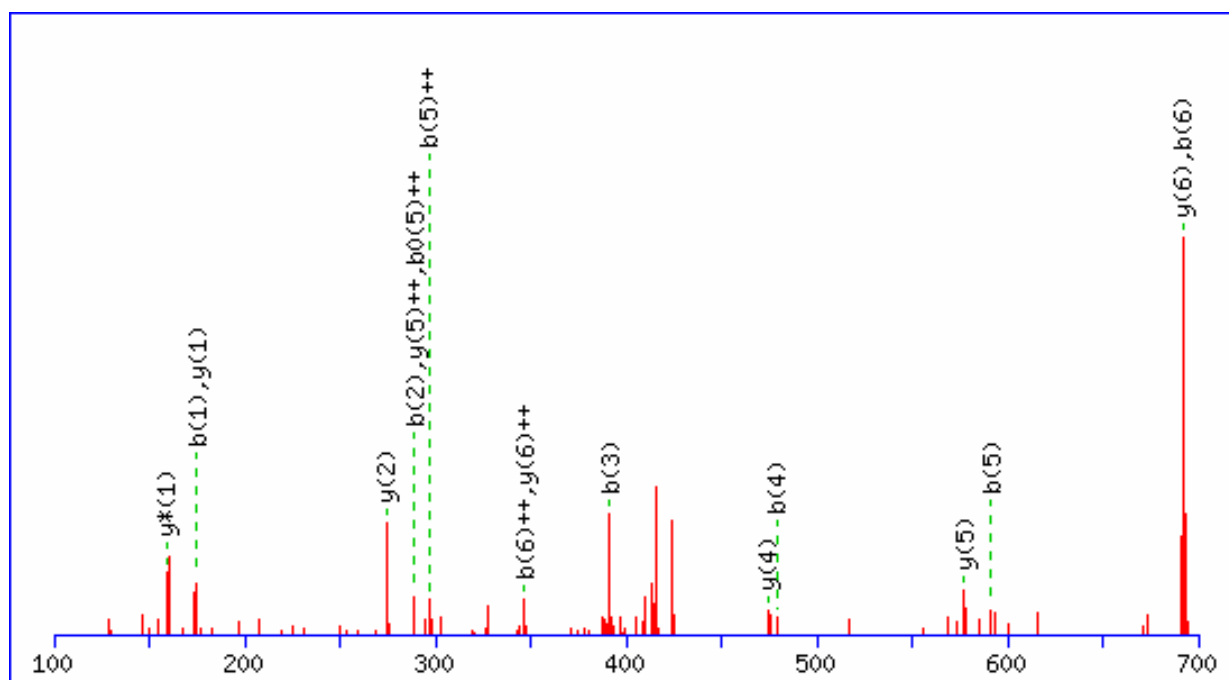

N-term : N-Acetyl (Protein)

| # | b      | b <sup>++</sup> | b <sup>0</sup> | b <sup>0++</sup> | Seq. | y      | y <sup>++</sup> | y*     | y <sup>+++</sup> | y <sup>0</sup> | y <sup>0++</sup> | # |
|---|--------|-----------------|----------------|------------------|------|--------|-----------------|--------|------------------|----------------|------------------|---|
| 1 | 174.24 | 87.62           |                |                  | M    |        |                 |        |                  |                |                  | 7 |
| 2 | 289.33 | 145.17          | 271.31         | 136.16           | D    | 692.81 | 346.91          | 675.77 | 338.39           | 674.79         | 337.90           | 6 |
| 3 | 392.47 | 196.74          | 374.46         | 187.73           | C    | 577.72 | 289.36          | 560.69 | 280.85           | 559.70         | 280.36           | 5 |
| 4 | 479.55 | 240.28          | 461.53         | 231.27           | S    | 474.57 | 237.79          | 457.54 | 229.28           | 456.56         | 228.78           | 4 |
| 5 | 592.71 | 296.86          | 574.69         | 287.85           | L    | 387.50 | 194.25          | 370.47 | 185.74           |                |                  | 3 |
| 6 | 691.84 | 346.42          | 673.82         | 337.41           | V    | 274.34 | 137.67          | 257.31 | 129.16           |                |                  | 2 |
| 7 |        |                 |                |                  | R    | 175.21 | 88.11           | 158.18 | 79.59            |                |                  | 1 |

Gene Symbol  
ATP11A

Sequences  
Y**C**AGEENWVDSR

m/z  
715.10

Charge  
2+

Ion score  
84.6

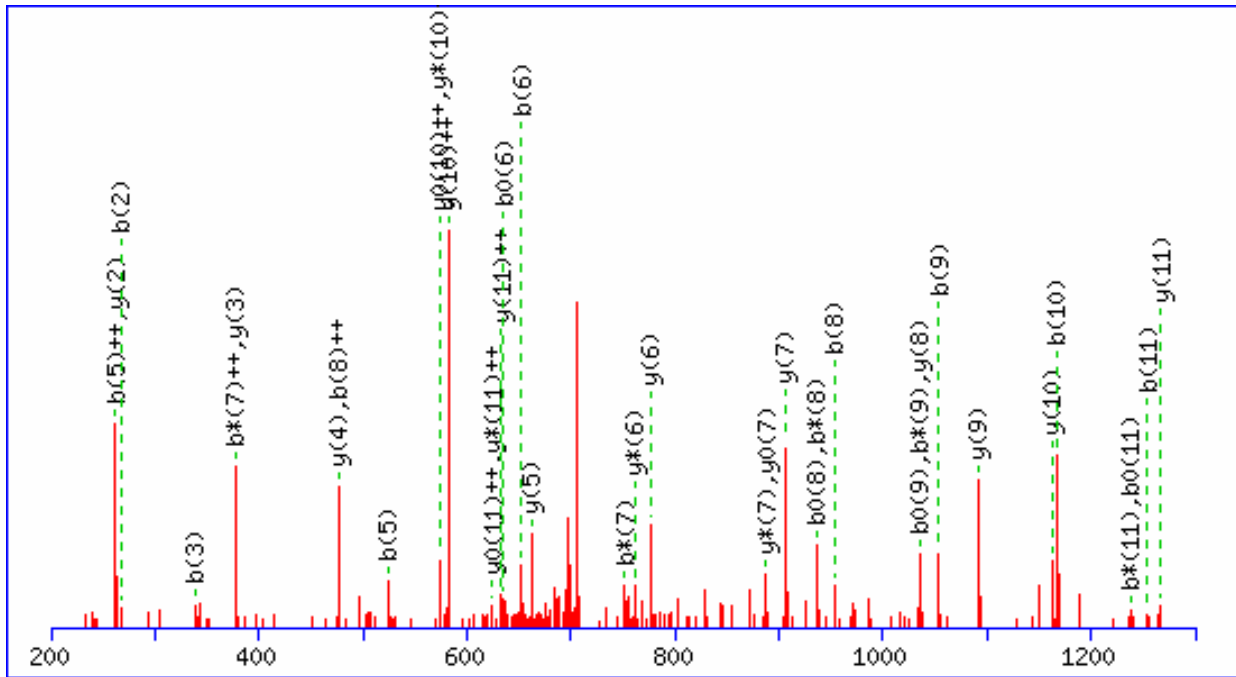

| #  | b              | b <sup>++</sup> | b <sup>*</sup> | b <sup>+++</sup> | b <sup>0</sup> | b <sup>0++</sup> | Seq. | y              | y <sup>++</sup> | y <sup>*</sup> | y <sup>+++</sup> | y <sup>0</sup> | y <sup>0++</sup> | #  |
|----|----------------|-----------------|----------------|------------------|----------------|------------------|------|----------------|-----------------|----------------|------------------|----------------|------------------|----|
| 1  | 164.18         | 82.59           |                |                  |                |                  | Y    |                |                 |                |                  |                |                  | 12 |
| 2  | <b>267.32</b>  | 134.17          |                |                  |                |                  | C    | <b>1266.32</b> | <b>633.66</b>   | 1249.29        | <b>625.15</b>    | 1248.30        | <b>624.65</b>    | 11 |
| 3  | <b>338.40</b>  | 169.70          |                |                  |                |                  | A    | <b>1163.17</b> | <b>582.09</b>   | 1146.14        | <b>573.58</b>    | 1145.16        | <b>573.08</b>    | 10 |
| 4  | 395.45         | 198.23          |                |                  |                |                  | G    | <b>1092.10</b> | 546.55          | 1075.07        | 538.04           | 1074.08        | 537.54           | 9  |
| 5  | <b>524.57</b>  | <b>262.79</b>   |                |                  | 506.55         | 253.78           | E    | <b>1035.05</b> | 518.03          | 1018.01        | 509.51           | 1017.03        | 509.02           | 8  |
| 6  | <b>653.68</b>  | 327.34          |                |                  | <b>635.67</b>  | 318.34           | E    | <b>905.93</b>  | 453.47          | <b>888.90</b>  | 444.95           | <b>887.92</b>  | 444.46           | 7  |
| 7  | 767.78         | 384.40          | <b>750.75</b>  | <b>375.88</b>    | 749.77         | 375.39           | N    | <b>776.82</b>  | 388.91          | <b>759.79</b>  | 380.40           | 758.80         | 379.90           | 6  |
| 8  | <b>953.99</b>  | <b>477.50</b>   | <b>936.96</b>  | 468.99           | <b>935.98</b>  | 468.49           | W    | <b>662.71</b>  | 331.86          | 645.68         | 323.35           | 644.70         | 322.85           | 5  |
| 9  | <b>1053.12</b> | 527.07          | <b>1036.09</b> | 518.55           | <b>1035.11</b> | 518.06           | V    | <b>476.50</b>  | 238.76          | 459.47         | 230.24           | 458.49         | 229.75           | 4  |
| 10 | <b>1168.21</b> | 584.61          | 1151.18        | 576.09           | 1150.20        | 575.60           | D    | <b>377.37</b>  | 189.19          | 360.34         | 180.68           | 359.36         | 180.18           | 3  |
| 11 | <b>1255.29</b> | 628.15          | <b>1238.26</b> | 619.63           | <b>1237.27</b> | 619.14           | S    | <b>262.29</b>  | 131.65          | 245.26         | 123.13           | 244.27         | 122.64           | 2  |
| 12 |                |                 |                |                  |                |                  | R    | 175.21         | 88.11           | 158.18         | 79.59            |                |                  | 1  |

Gene Symbol  
ATP1A1

Sequences  
LIIVEG**C**QR

m/z  
515.61

Charge  
2+

Ion score  
52.8

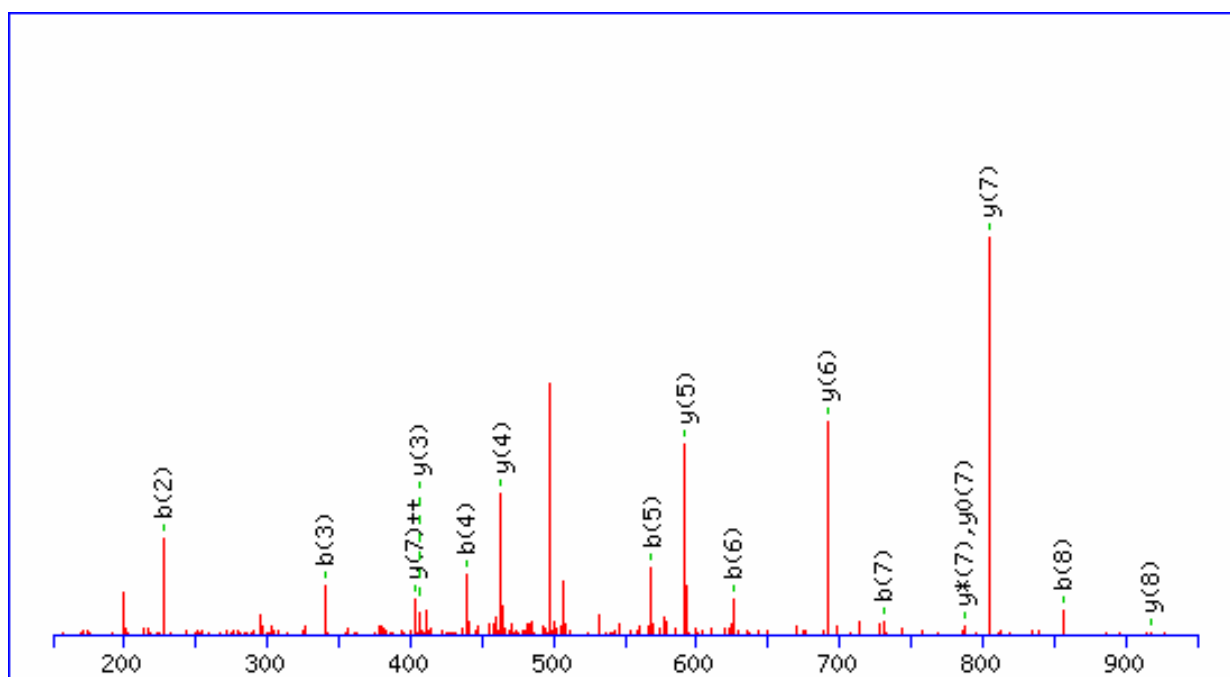

| # | b      | b <sup>++</sup> | b <sup>*</sup> | b <sup>*++</sup> | b <sup>0</sup> | b <sup>0++</sup> | Seq. | y      | y <sup>++</sup> | y <sup>*</sup> | y <sup>*++</sup> | y <sup>0</sup> | y <sup>0++</sup> | # |
|---|--------|-----------------|----------------|------------------|----------------|------------------|------|--------|-----------------|----------------|------------------|----------------|------------------|---|
| 1 | 114.17 | 57.59           |                |                  |                |                  | L    |        |                 |                |                  |                |                  | 9 |
| 2 | 227.32 | 114.17          |                |                  |                |                  | I    | 918.09 | 459.55          | 901.06         | 451.04           | 900.08         | 450.54           | 8 |
| 3 | 340.48 | 170.74          |                |                  |                |                  | I    | 804.94 | 402.97          | 787.90         | 394.46           | 786.92         | 393.96           | 7 |
| 4 | 439.61 | 220.31          |                |                  |                |                  | V    | 691.78 | 346.39          | 674.75         | 337.88           | 673.76         | 337.39           | 6 |
| 5 | 568.73 | 284.87          |                |                  | 550.71         | 275.86           | E    | 592.65 | 296.83          | 575.62         | 288.31           | 574.63         | 287.82           | 5 |
| 6 | 625.78 | 313.39          |                |                  | 607.76         | 304.38           | G    | 463.53 | 232.27          | 446.50         | 223.75           |                |                  | 4 |
| 7 | 728.92 | 364.96          |                |                  | 710.90         | 355.96           | C    | 406.48 | 203.74          | 389.45         | 195.23           |                |                  | 3 |
| 8 | 857.05 | 429.03          | 840.02         | 420.51           | 839.03         | 420.02           | Q    | 303.34 | 152.17          | 286.31         | 143.66           |                |                  | 2 |
| 9 |        |                 |                |                  |                |                  | R    | 175.21 | 88.11           | 158.18         | 79.59            |                |                  | 1 |

Gene Symbol  
ATP1A1

Sequences  
NLEAVETLGSTSTICSDKTGTTLQNR

m/z  
914.46

Charge  
3+

Ion score  
64.9

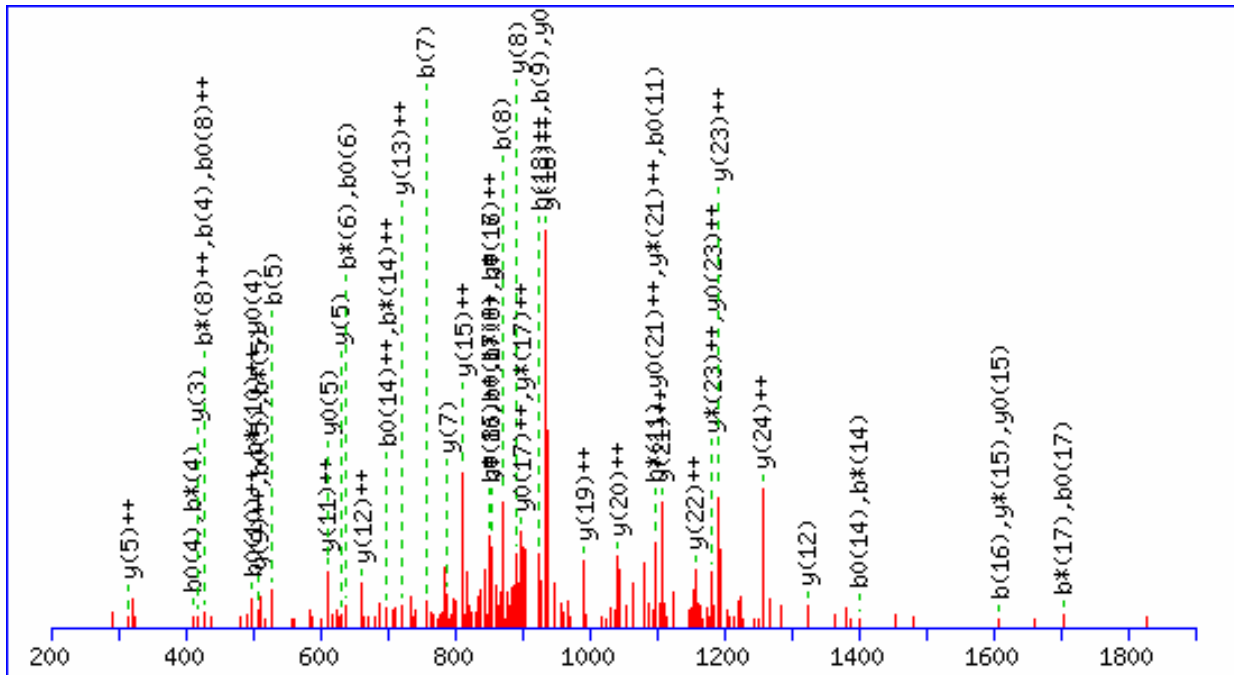

| #  | b              | b <sup>++</sup> | b <sup>+</sup> | b <sup>+++</sup> | b <sup>0</sup> | b <sup>0++</sup> | Seq. | y              | y <sup>++</sup> | y <sup>+</sup> | y <sup>+++</sup> | y <sup>0</sup> | y <sup>0++</sup> | #  |
|----|----------------|-----------------|----------------|------------------|----------------|------------------|------|----------------|-----------------|----------------|------------------|----------------|------------------|----|
| 1  | 115.11         | 58.06           | 98.08          | 49.54            |                |                  | N    |                |                 |                |                  |                |                  | 26 |
| 2  | 228.27         | 114.64          | 211.24         | 106.12           |                |                  | L    | 2626.87        | 1313.94         | 2609.84        | 1305.42          | 2608.85        | 1304.93          | 25 |
| 3  | 357.38         | 179.20          | 340.35         | 170.68           | 339.37         | 170.19           | E    | 2513.71        | <b>1257.36</b>  | 2496.68        | 1248.84          | 2495.70        | 1248.35          | 24 |
| 4  | <b>428.46</b>  | 214.73          | <b>411.43</b>  | 206.22           | <b>410.44</b>  | 205.73           | A    | 2384.60        | <b>1192.80</b>  | 2367.57        | <b>1184.29</b>   | 2366.58        | <b>1183.79</b>   | 23 |
| 5  | <b>527.59</b>  | 264.30          | <b>510.56</b>  | 255.78           | <b>509.58</b>  | 255.29           | V    | 2313.52        | <b>1157.26</b>  | 2296.49        | 1148.75          | 2295.50        | 1148.26          | 22 |
| 6  | 656.71         | 328.86          | <b>639.67</b>  | 320.34           | <b>638.69</b>  | 319.85           | E    | 2214.39        | <b>1107.70</b>  | 2197.36        | <b>1099.18</b>   | 2196.37        | <b>1098.69</b>   | 21 |
| 7  | <b>757.81</b>  | 379.41          | 740.78         | 370.89           | 739.79         | 370.40           | T    | 2085.27        | <b>1043.14</b>  | 2068.24        | 1034.63          | 2067.26        | 1034.13          | 20 |
| 8  | <b>870.97</b>  | 435.99          | <b>853.94</b>  | <b>427.47</b>    | <b>852.95</b>  | <b>426.98</b>    | L    | 1984.17        | <b>992.59</b>   | 1967.14        | 984.07           | 1966.15        | 983.58           | 19 |
| 9  | <b>928.02</b>  | 464.51          | 910.99         | 456.00           | 910.00         | 455.51           | G    | 1871.01        | <b>936.01</b>   | 1853.98        | <b>927.49</b>    | 1853.00        | <b>927.00</b>    | 18 |
| 10 | 1015.10        | 508.05          | 998.06         | <b>499.54</b>    | 997.08         | <b>499.04</b>    | S    | 1813.96        | 907.48          | 1796.93        | <b>898.97</b>    | 1795.95        | <b>898.48</b>    | 17 |
| 11 | 1116.20        | 558.60          | <b>1099.17</b> | 550.09           | <b>1098.18</b> | 549.60           | T    | 1726.88        | 863.95          | 1709.85        | <b>855.43</b>    | 1708.87        | <b>854.94</b>    | 16 |
| 12 | 1203.28        | 602.14          | 1186.25        | 593.63           | 1185.26        | 593.13           | S    | 1625.78        | <b>813.39</b>   | <b>1608.75</b> | 804.88           | <b>1607.76</b> | 804.39           | 15 |
| 13 | 1304.38        | 652.69          | 1287.35        | 644.18           | 1286.37        | 643.69           | T    | 1538.70        | 769.86          | 1521.67        | 761.34           | 1520.69        | 760.85           | 14 |
| 14 | 1417.54        | 709.27          | <b>1400.51</b> | <b>700.76</b>    | <b>1399.52</b> | <b>700.27</b>    | I    | 1437.60        | <b>719.30</b>   | 1420.57        | 710.79           | 1419.58        | 710.30           | 13 |
| 15 | 1520.68        | 760.84          | 1503.65        | 752.33           | 1502.67        | 751.84           | C    | <b>1324.44</b> | <b>662.72</b>   | 1307.41        | 654.21           | 1306.43        | 653.72           | 12 |
| 16 | <b>1607.76</b> | 804.38          | 1590.73        | 795.87           | 1589.74        | 795.38           | S    | 1221.30        | <b>611.15</b>   | 1204.27        | 602.64           | 1203.28        | 602.15           | 11 |
| 17 | 1722.85        | 861.93          | <b>1705.82</b> | <b>853.41</b>    | <b>1704.83</b> | <b>852.92</b>    | D    | 1134.22        | 567.61          | 1117.19        | 559.10           | 1116.21        | 558.61           | 10 |
| 18 | 1851.02        | <b>926.01</b>   | 1833.99        | 917.50           | 1833.00        | 917.01           | K    | 1019.13        | <b>510.07</b>   | 1002.10        | 501.56           | 1001.12        | 501.06           | 9  |
| 19 | 1952.12        | 976.56          | 1935.09        | 968.05           | 1934.11        | 967.56           | T    | <b>890.96</b>  | 445.98          | 873.93         | 437.47           | 872.95         | 436.98           | 8  |
| 20 | 2009.17        | 1005.09         | 1992.14        | 996.58           | 1991.16        | 996.08           | G    | <b>789.86</b>  | 395.43          | 772.83         | 386.92           | 771.84         | 386.43           | 7  |
| 21 | 2110.28        | 1055.64         | 2093.25        | 1047.13          | 2092.26        | 1046.63          | T    | 732.81         | 366.91          | 715.78         | 358.39           | 714.79         | 357.90           | 6  |
| 22 | 2223.43        | 1112.22         | 2206.40        | 1103.71          | 2205.42        | 1103.21          | L    | <b>631.70</b>  | <b>316.36</b>   | 614.67         | 307.84           | <b>613.69</b>  | 307.35           | 5  |
| 23 | 2324.54        | 1162.77         | 2307.51        | 1154.26          | 2306.52        | 1153.77          | T    | 518.54         | 259.78          | 501.51         | 251.26           | <b>500.53</b>  | 250.77           | 4  |
| 24 | 2452.67        | 1226.84         | 2435.64        | 1218.32          | 2434.65        | 1217.83          | Q    | <b>417.44</b>  | 209.22          | 400.41         | 200.71           |                |                  | 3  |
| 25 | 2566.77        | 1283.89         | 2549.74        | 1275.37          | 2548.75        | 1274.88          | N    | 289.31         | 145.16          | 272.28         | 136.64           |                |                  | 2  |
| 26 |                |                 |                |                  |                |                  | R    | 175.21         | 88.11           | 158.18         | 79.59            |                |                  | 1  |

Gene Symbol  
ATP9A

Sequences  
AGCCEWLR

m/z  
469.63

Charge  
2+

Ion score  
58.1

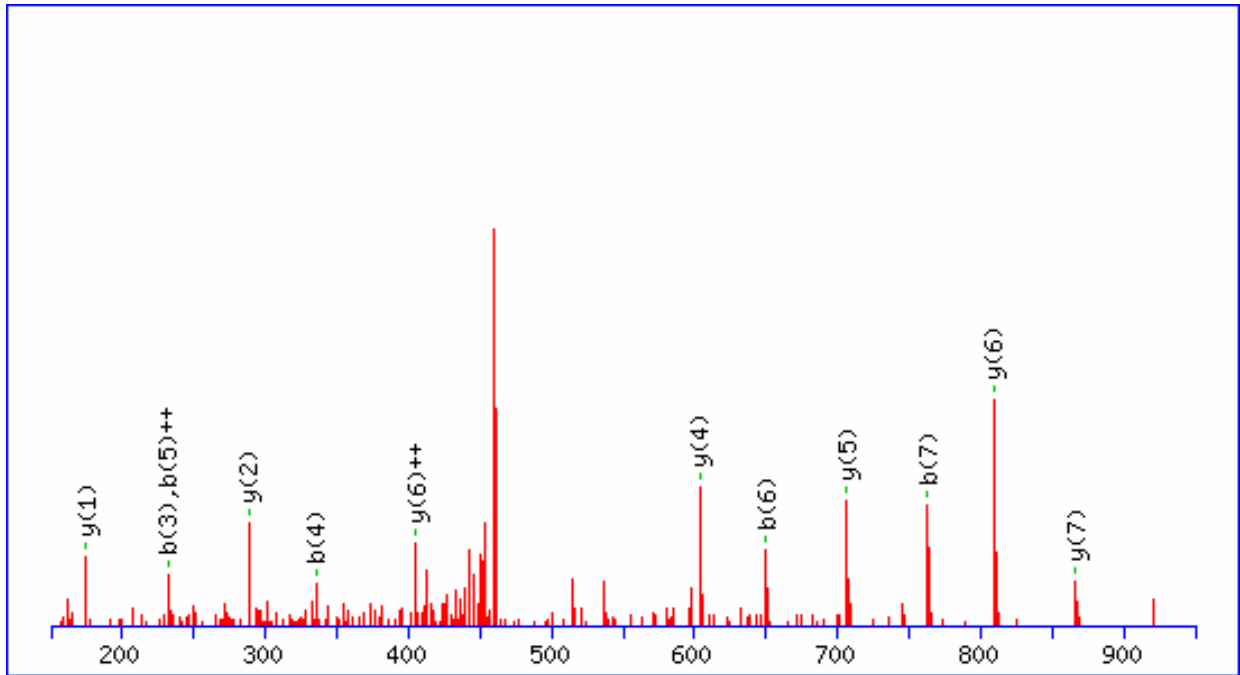

| # | b      | b <sup>++</sup> | b <sup>0</sup> | b <sup>0++</sup> | Seq. | y      | y <sup>++</sup> | y <sup>*</sup> | y <sup>*++</sup> | y <sup>0</sup> | y <sup>0++</sup> | # |
|---|--------|-----------------|----------------|------------------|------|--------|-----------------|----------------|------------------|----------------|------------------|---|
| 1 | 72.09  | 36.55           |                |                  | A    |        |                 |                |                  |                |                  | 8 |
| 2 | 129.14 | 65.07           |                |                  | G    | 867.03 | 434.02          | 850.00         | 425.50           | 849.01         | 425.01           | 7 |
| 3 | 232.28 | 116.64          |                |                  | C    | 809.98 | 405.49          | 792.95         | 396.98           | 791.96         | 396.48           | 6 |
| 4 | 335.42 | 168.22          |                |                  | C    | 706.83 | 353.92          | 689.80         | 345.41           | 688.82         | 344.91           | 5 |
| 5 | 464.54 | 232.77          | 446.52         | 223.76           | E    | 603.69 | 302.35          | 586.66         | 293.83           | 585.68         | 293.34           | 4 |
| 6 | 650.75 | 325.88          | 632.73         | 316.87           | W    | 474.58 | 237.79          | 457.55         | 229.28           |                |                  | 3 |
| 7 | 763.90 | 382.46          | 745.89         | 373.45           | L    | 288.37 | 144.69          | 271.34         | 136.17           |                |                  | 2 |
| 8 |        |                 |                |                  | R    | 175.21 | 88.11           | 158.18         | 79.59            |                |                  | 1 |



| Gene Symbol | Sequences         | m/z    | Charge | Ion score |
|-------------|-------------------|--------|--------|-----------|
| C13orf1     | ATSVL <b>CCLR</b> | 504.58 | 2+     | 78.8      |

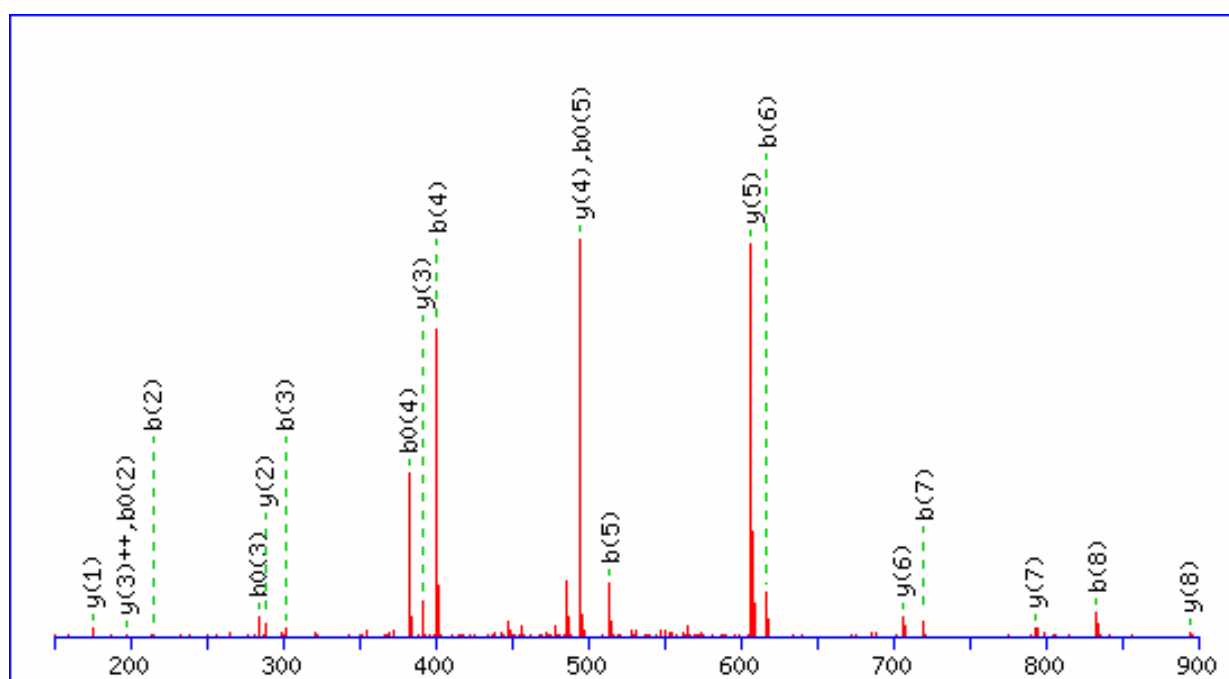

**N-term : N-Acetyl (Protein)**

| # | b             | b <sup>++</sup> | b <sup>0</sup> | b <sup>0++</sup> | Seq. | y             | y <sup>++</sup> | y <sup>*</sup> | y <sup>*++</sup> | y <sup>0</sup> | y <sup>0++</sup> | # |
|---|---------------|-----------------|----------------|------------------|------|---------------|-----------------|----------------|------------------|----------------|------------------|---|
| 1 | 114.12        | 57.57           |                |                  | A    |               |                 |                |                  |                |                  | 9 |
| 2 | <b>215.23</b> | 108.12          | <b>197.21</b>  | 99.11            | T    | <b>895.12</b> | 448.07          | 878.09         | 439.55           | 877.11         | 439.06           | 8 |
| 3 | <b>302.30</b> | 151.66          | <b>284.29</b>  | 142.65           | S    | <b>794.02</b> | 397.51          | 776.99         | 389.00           | 776.00         | 388.51           | 7 |
| 4 | <b>401.43</b> | 201.22          | <b>383.42</b>  | 192.21           | V    | <b>706.94</b> | 353.97          | 689.91         | 345.46           |                |                  | 6 |
| 5 | <b>514.59</b> | 257.80          | <b>496.58</b>  | 248.79           | L    | <b>607.81</b> | 304.41          | 590.78         | 295.89           |                |                  | 5 |
| 6 | <b>617.74</b> | 309.37          | 599.72         | 300.36           | C    | <b>494.65</b> | 247.83          | 477.62         | 239.31           |                |                  | 4 |
| 7 | <b>720.88</b> | 360.94          | 702.86         | 351.94           | C    | <b>391.51</b> | <b>196.26</b>   | 374.48         | 187.74           |                |                  | 3 |
| 8 | <b>834.04</b> | 417.52          | 816.02         | 408.51           | L    | <b>288.37</b> | 144.69          | 271.34         | 136.17           |                |                  | 2 |
| 9 |               |                 |                |                  | R    | <b>175.21</b> | 88.11           | 158.18         | 79.59            |                |                  | 1 |

Gene Symbol  
C6orf125

Sequences  
VAQAFREGENTQVAEPEA**C**DQMYESLAR

m/z  
1048.57

Charge  
3+

Ion score  
50.1

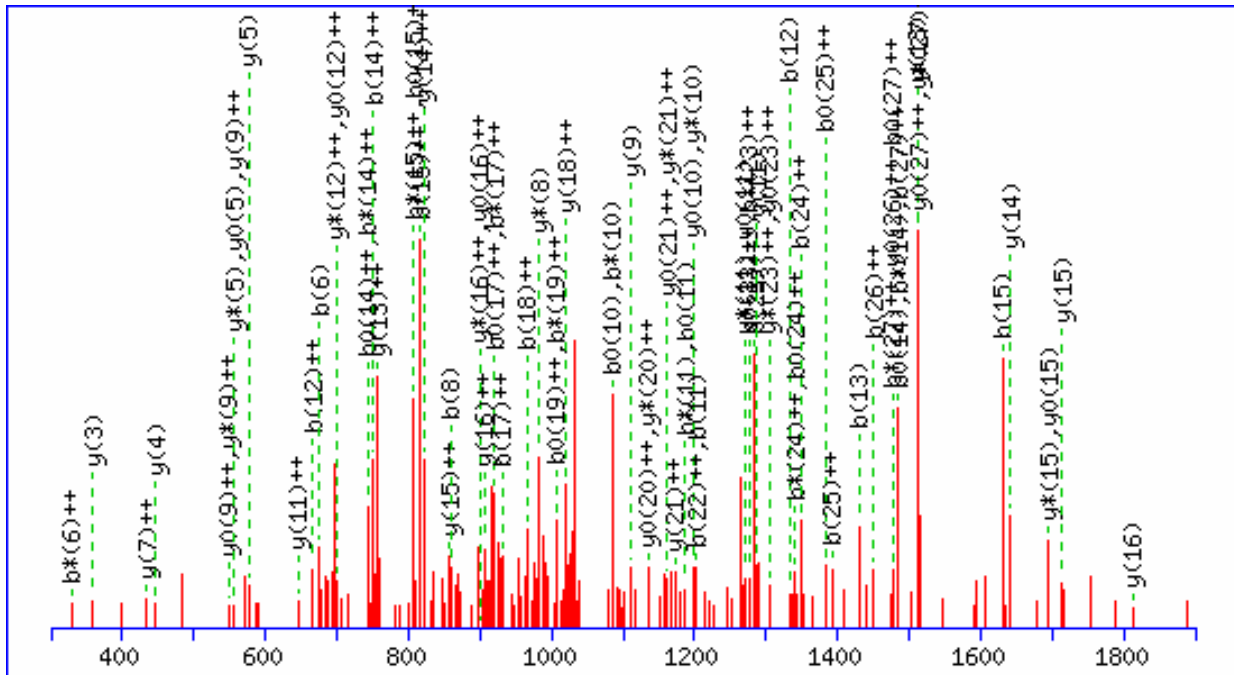

| #  | b              | b <sup>+</sup> | b <sup>+</sup> | b <sup>++</sup> | b <sup>0</sup> | b <sup>0+</sup> | Seq. | y              | y <sup>+</sup> | y <sup>+</sup> | y <sup>++</sup> | y <sup>0</sup> | y <sup>0+</sup> | #  |
|----|----------------|----------------|----------------|-----------------|----------------|-----------------|------|----------------|----------------|----------------|-----------------|----------------|-----------------|----|
| 1  | 100.14         | 50.57          |                |                 |                |                 | V    |                |                |                |                 |                |                 | 28 |
| 2  | 171.22         | 86.11          |                |                 |                |                 | A    | 3045.25        | 1523.13        | 3028.22        | <b>1514.62</b>  | 3027.24        | <b>1514.12</b>  | 27 |
| 3  | 299.35         | 150.18         | 282.32         | 141.66          |                |                 | Q    | 2974.18        | 1487.59        | 2957.15        | 1479.08         | 2956.16        | <b>1478.58</b>  | 26 |
| 4  | 370.42         | 185.72         | 353.39         | 177.20          |                |                 | A    | 2846.05        | 1423.53        | 2829.02        | 1415.01         | 2828.03        | 1414.52         | 25 |
| 5  | 517.60         | 259.30         | 500.57         | 250.79          |                |                 | F    | 2774.97        | 1387.99        | 2757.94        | 1379.47         | 2756.95        | 1378.98         | 24 |
| 6  | <b>673.78</b>  | 337.40         | 656.75         | <b>328.88</b>   |                |                 | R    | 2627.80        | 1314.40        | 2610.76        | <b>1305.89</b>  | 2609.78        | <b>1305.39</b>  | 23 |
| 7  | 802.90         | 401.95         | 785.87         | 393.44          | 784.88         | 392.95          | E    | 2471.61        | 1236.31        | 2454.58        | 1227.79         | 2453.59        | 1227.30         | 22 |
| 8  | <b>859.95</b>  | 430.48         | 842.92         | 421.96          | 841.93         | 421.47          | G    | 2342.50        | <b>1171.75</b> | 2325.47        | <b>1163.24</b>  | 2324.48        | <b>1162.74</b>  | 21 |
| 9  | 989.06         | 495.04         | 972.03         | 486.52          | 971.05         | 486.03          | E    | 2285.44        | 1143.23        | 2268.41        | <b>1134.71</b>  | 2267.43        | <b>1134.22</b>  | 20 |
| 10 | 1103.17        | 552.09         | <b>1086.14</b> | 543.57          | <b>1085.15</b> | 543.08          | N    | 2156.33        | 1078.67        | 2139.30        | 1070.15         | 2138.32        | 1069.66         | 19 |
| 11 | <b>1204.27</b> | 602.64         | <b>1187.24</b> | 594.12          | <b>1186.25</b> | 593.63          | T    | 2042.23        | <b>1021.62</b> | 2025.20        | 1013.10         | 2024.21        | 1012.61         | 18 |
| 12 | <b>1332.40</b> | <b>666.70</b>  | 1315.37        | 658.19          | 1314.38        | 657.70          | Q    | 1941.12        | 971.07         | 1924.09        | 962.55          | 1923.11        | 962.06          | 17 |
| 13 | <b>1431.53</b> | 716.27         | 1414.50        | 707.75          | 1413.51        | 707.26          | V    | <b>1812.99</b> | <b>907.00</b>  | 1795.96        | <b>898.49</b>   | 1794.98        | <b>897.99</b>   | 16 |
| 14 | 1502.61        | <b>751.81</b>  | <b>1485.58</b> | <b>743.29</b>   | <b>1484.59</b> | <b>742.80</b>   | A    | <b>1713.86</b> | <b>857.44</b>  | <b>1696.83</b> | 848.92          | <b>1695.85</b> | 848.43          | 15 |
| 15 | <b>1631.72</b> | <b>816.36</b>  | 1614.69        | <b>807.85</b>   | 1613.71        | <b>807.36</b>   | E    | <b>1642.79</b> | <b>821.90</b>  | 1625.76        | 813.38          | 1624.77        | 812.89          | 14 |
| 16 | 1728.84        | 864.92         | 1711.81        | 856.41          | 1710.82        | 855.91          | P    | <b>1513.67</b> | <b>757.34</b>  | 1496.64        | 748.82          | 1495.66        | 748.33          | 13 |
| 17 | 1857.95        | <b>929.48</b>  | 1840.92        | <b>920.96</b>   | 1839.94        | <b>920.47</b>   | E    | 1416.56        | 708.78         | 1399.53        | <b>700.27</b>   | 1398.54        | <b>699.77</b>   | 12 |
| 18 | 1929.03        | <b>965.02</b>  | 1912.00        | 956.50          | 1911.01        | 956.01          | A    | <b>1287.44</b> | <b>644.23</b>  | <b>1270.41</b> | 635.71          | <b>1269.43</b> | 635.22          | 11 |
| 19 | 2032.17        | 1016.59        | 2015.14        | <b>1008.07</b>  | 2014.16        | <b>1007.58</b>  | C    | 1216.36        | 608.69         | <b>1199.33</b> | 600.17          | <b>1198.35</b> | 599.68          | 10 |
| 20 | 2147.26        | 1074.13        | 2130.23        | 1065.62         | 2129.24        | 1065.13         | D    | <b>1113.22</b> | <b>557.11</b>  | 1096.19        | <b>548.60</b>   | 1095.21        | <b>548.11</b>   | 9  |
| 21 | 2275.39        | 1138.20        | 2258.36        | 1129.68         | 2257.37        | 1129.19         | Q    | 998.13         | 499.57         | <b>981.10</b>  | 491.06          | 980.12         | 490.56          | 8  |
| 22 | 2406.58        | <b>1203.80</b> | 2389.55        | 1195.28         | 2388.57        | 1194.79         | M    | 870.01         | <b>435.51</b>  | 852.97         | 426.99          | 851.99         | 426.50          | 7  |
| 23 | 2569.76        | <b>1285.38</b> | 2552.73        | <b>1276.87</b>  | 2551.74        | <b>1276.38</b>  | Y    | 738.81         | 369.91         | 721.78         | 361.39          | 720.79         | 360.90          | 6  |
| 24 | 2698.87        | <b>1349.94</b> | 2681.84        | <b>1341.42</b>  | 2680.86        | <b>1340.93</b>  | E    | <b>575.64</b>  | 288.32         | <b>558.61</b>  | 279.81          | <b>557.62</b>  | 279.31          | 5  |
| 25 | 2785.95        | <b>1393.48</b> | 2768.92        | 1384.96         | 2767.93        | <b>1384.47</b>  | S    | <b>446.52</b>  | 223.76         | 429.49         | 215.25          | 428.51         | 214.76          | 4  |
| 26 | 2899.11        | <b>1450.06</b> | 2882.08        | 1441.54         | 2881.09        | 1441.05         | L    | <b>359.44</b>  | 180.23         | 342.41         | 171.71          |                |                 | 3  |
| 27 | 2970.18        | <b>1485.60</b> | 2953.15        | <b>1477.08</b>  | 2952.17        | <b>1476.59</b>  | A    | 246.29         | 123.65         | 229.26         | 115.13          |                |                 | 2  |
| 28 |                |                |                |                 |                |                 | R    | 175.21         | 88.11          | 158.18         | 79.59           |                |                 | 1  |

Gene Symbol  
CAPN5

Sequences  
MFSVVKPYEDQNYSALR

m/z  
750.93

Charge  
3+

Ion score  
76.3

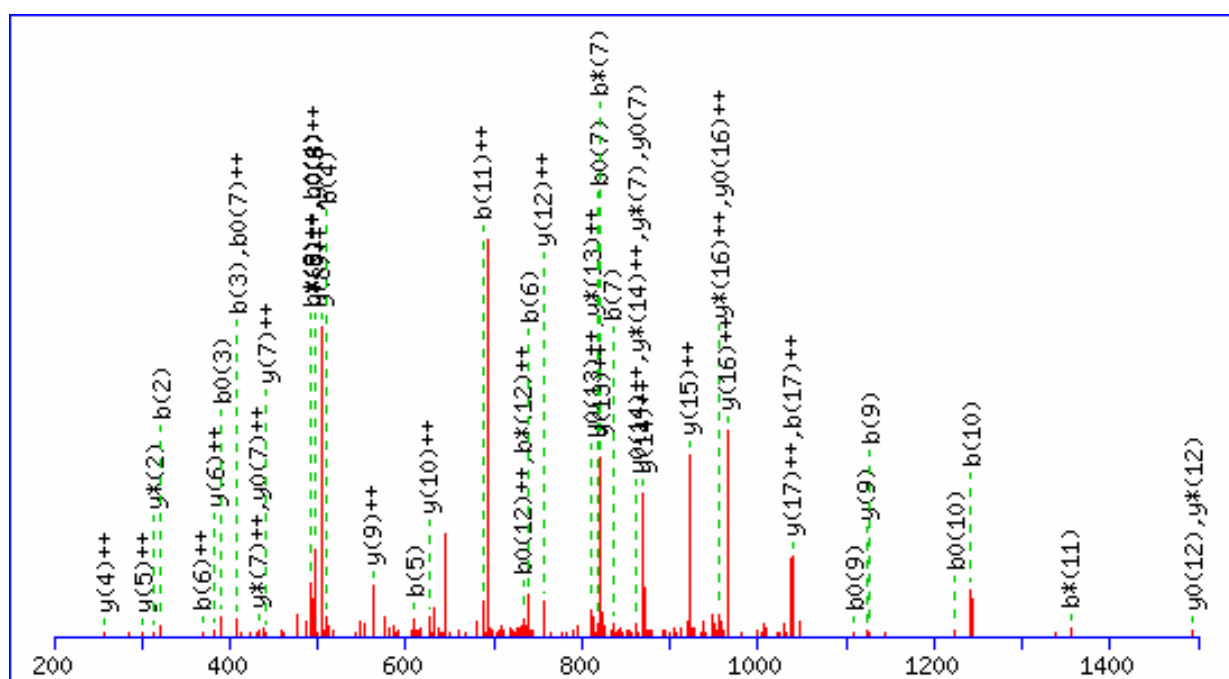

N-term : N-Acetyl (Protein)

| #  | b              | b <sup>++</sup> | b <sup>+</sup> | b <sup>+++</sup> | b <sup>0</sup> | b <sup>0++</sup> | Seq. | y              | y <sup>++</sup> | y <sup>+</sup> | y <sup>+++</sup> | y <sup>0</sup> | y <sup>0++</sup> | #  |
|----|----------------|-----------------|----------------|------------------|----------------|------------------|------|----------------|-----------------|----------------|------------------|----------------|------------------|----|
| 1  | 174.24         | 87.62           |                |                  |                |                  | M    |                |                 |                |                  |                |                  | 18 |
| 2  | <b>321.41</b>  | 161.21          |                |                  |                |                  | F    | 2077.30        | <b>1039.15</b>  | 2060.27        | 1030.64          | 2059.28        | 1030.15          | 17 |
| 3  | <b>408.49</b>  | 204.75          |                |                  | <b>390.48</b>  | 195.74           | S    | 1930.13        | <b>965.57</b>   | 1913.10        | <b>957.05</b>    | 1912.11        | <b>956.56</b>    | 16 |
| 4  | <b>511.63</b>  | 256.32          |                |                  | <b>493.62</b>  | 247.31           | C    | 1843.05        | <b>922.03</b>   | 1826.02        | 913.51           | 1825.03        | 913.02           | 15 |
| 5  | <b>610.77</b>  | 305.89          |                |                  | 592.75         | 296.88           | V    | 1739.91        | <b>870.46</b>   | 1722.88        | <b>861.94</b>    | 1721.89        | <b>861.45</b>    | 14 |
| 6  | <b>738.94</b>  | <b>369.97</b>   | 721.91         | 361.46           | 720.92         | 360.97           | K    | 1640.77        | <b>820.89</b>   | 1623.74        | <b>812.38</b>    | 1622.76        | <b>811.88</b>    | 13 |
| 7  | <b>836.05</b>  | 418.53          | <b>819.02</b>  | 410.02           | <b>818.04</b>  | <b>409.52</b>    | P    | 1512.60        | <b>756.81</b>   | <b>1495.57</b> | 748.29           | <b>1494.59</b> | 747.80           | 12 |
| 8  | 999.23         | 500.12          | 982.20         | <b>491.60</b>    | 981.21         | 491.11           | Y    | 1415.49        | 708.25          | 1398.46        | 699.73           | 1397.47        | 699.24           | 11 |
| 9  | <b>1128.34</b> | 564.67          | 1111.31        | 556.16           | <b>1110.33</b> | 555.67           | E    | 1252.31        | <b>626.66</b>   | 1235.28        | 618.15           | 1234.30        | 617.65           | 10 |
| 10 | <b>1243.43</b> | 622.22          | 1226.40        | 613.70           | <b>1225.41</b> | 613.21           | D    | <b>1123.20</b> | <b>562.10</b>   | 1106.17        | 553.59           | 1105.18        | 553.10           | 9  |
| 11 | 1371.56        | <b>686.28</b>   | <b>1354.53</b> | 677.77           | 1353.54        | 677.27           | Q    | 1008.11        | <b>504.56</b>   | 991.08         | <b>496.04</b>    | 990.10         | <b>495.55</b>    | 8  |
| 12 | 1485.66        | 743.33          | 1468.63        | <b>734.82</b>    | 1467.64        | <b>734.33</b>    | N    | 879.98         | <b>440.50</b>   | <b>862.95</b>  | <b>431.98</b>    | <b>861.97</b>  | <b>431.49</b>    | 7  |
| 13 | 1648.83        | 824.92          | 1631.80        | 816.41           | 1630.82        | 815.91           | Y    | 765.88         | <b>383.44</b>   | 748.85         | 374.93           | 747.87         | 374.44           | 6  |
| 14 | 1735.91        | 868.46          | 1718.88        | 859.94           | 1717.90        | 859.45           | S    | 602.71         | <b>301.86</b>   | 585.68         | 293.34           | 584.69         | 292.85           | 5  |
| 15 | 1806.99        | 904.00          | 1789.96        | 895.48           | 1788.97        | 894.99           | A    | 515.63         | <b>258.32</b>   | 498.60         | 249.80           |                |                  | 4  |
| 16 | 1920.15        | 960.58          | 1903.12        | 952.06           | 1902.13        | 951.57           | L    | 444.55         | 222.78          | 427.52         | 214.26           |                |                  | 3  |
| 17 | 2076.33        | <b>1038.67</b>  | 2059.30        | 1030.15          | 2058.32        | 1029.66          | R    | 331.39         | 166.20          | <b>314.36</b>  | 157.69           |                |                  | 2  |
| 18 |                |                 |                |                  |                |                  | R    | 175.21         | 88.11           | 158.18         | 79.59            |                |                  | 1  |

Gene Symbol  
CAV2

Sequences  
CFSSVSLQLSQD

m/z  
658.01

Charge  
2+

Ion score  
77.5

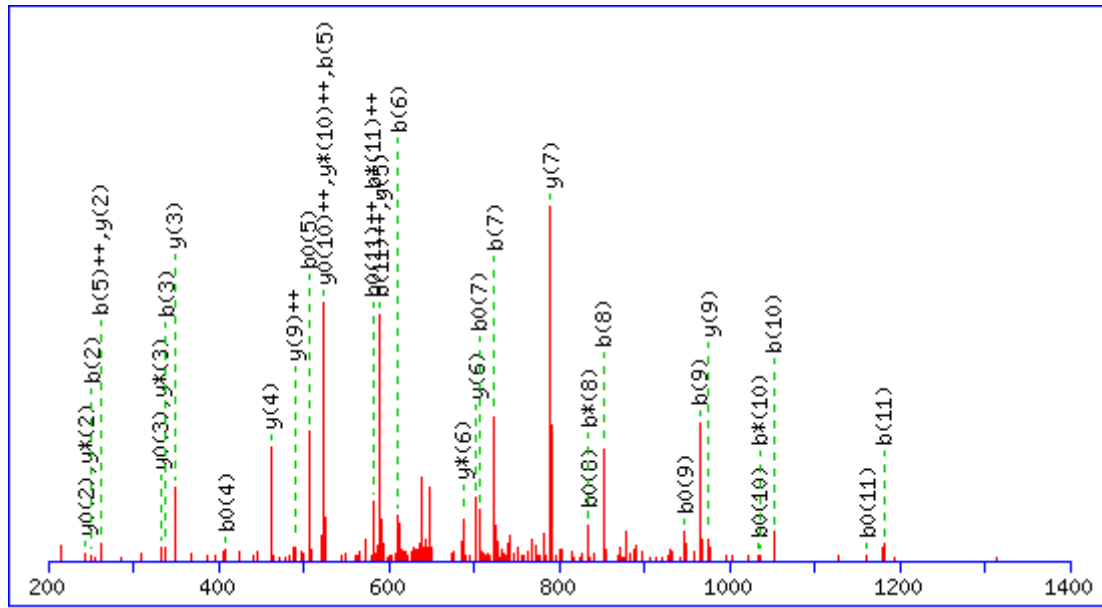

| #  | b       | b <sup>++</sup> | b <sup>+</sup> | b <sup>+++</sup> | b <sup>0</sup> | b <sup>0++</sup> | Seq. | y       | y <sup>++</sup> | y <sup>+</sup> | y <sup>+++</sup> | y <sup>0</sup> | y <sup>0++</sup> | #  |
|----|---------|-----------------|----------------|------------------|----------------|------------------|------|---------|-----------------|----------------|------------------|----------------|------------------|----|
| 1  | 104.15  | 52.58           |                |                  |                |                  | C    |         |                 |                |                  |                |                  | 12 |
| 2  | 251.32  | 126.17          |                |                  |                |                  | F    | 1211.30 | 606.15          | 1194.27        | 597.64           | 1193.28        | 597.15           | 11 |
| 3  | 338.40  | 169.70          |                |                  | 320.39         | 160.70           | S    | 1064.12 | 532.57          | 1047.09        | 524.05           | 1046.11        | 523.56           | 10 |
| 4  | 425.48  | 213.24          |                |                  | 407.46         | 204.24           | S    | 977.05  | 489.03          | 960.02         | 480.51           | 959.03         | 480.02           | 9  |
| 5  | 524.61  | 262.81          |                |                  | 506.60         | 253.80           | V    | 889.97  | 445.49          | 872.94         | 436.97           | 871.95         | 436.48           | 8  |
| 6  | 611.69  | 306.35          |                |                  | 593.67         | 297.34           | S    | 790.84  | 395.92          | 773.81         | 387.41           | 772.82         | 386.92           | 7  |
| 7  | 724.85  | 362.93          |                |                  | 706.83         | 353.92           | L    | 703.76  | 352.38          | 686.73         | 343.87           | 685.75         | 343.38           | 6  |
| 8  | 852.97  | 426.99          | 835.94         | 418.48           | 834.96         | 417.98           | Q    | 590.60  | 295.81          | 573.57         | 287.29           | 572.59         | 286.80           | 5  |
| 9  | 966.13  | 483.57          | 949.10         | 475.05           | 948.12         | 474.56           | L    | 462.47  | 231.74          | 445.44         | 223.23           | 444.46         | 222.73           | 4  |
| 10 | 1053.21 | 527.11          | 1036.18        | 518.59           | 1035.19        | 518.10           | S    | 349.32  | 175.16          | 332.29         | 166.65           | 331.30         | 166.15           | 3  |
| 11 | 1181.34 | 591.17          | 1164.31        | 582.66           | 1163.32        | 582.17           | Q    | 262.24  | 131.62          | 245.21         | 123.11           | 244.22         | 122.62           | 2  |
| 12 |         |                 |                |                  |                |                  | D    | 134.11  | 67.56           |                |                  | 116.10         | 58.55            | 1  |

Gene Symbol  
CAV2

Sequences  
SVTDVHIAPL**C**TSVGR

m/z  
816.144

Charge  
2+

Ion score  
53.6

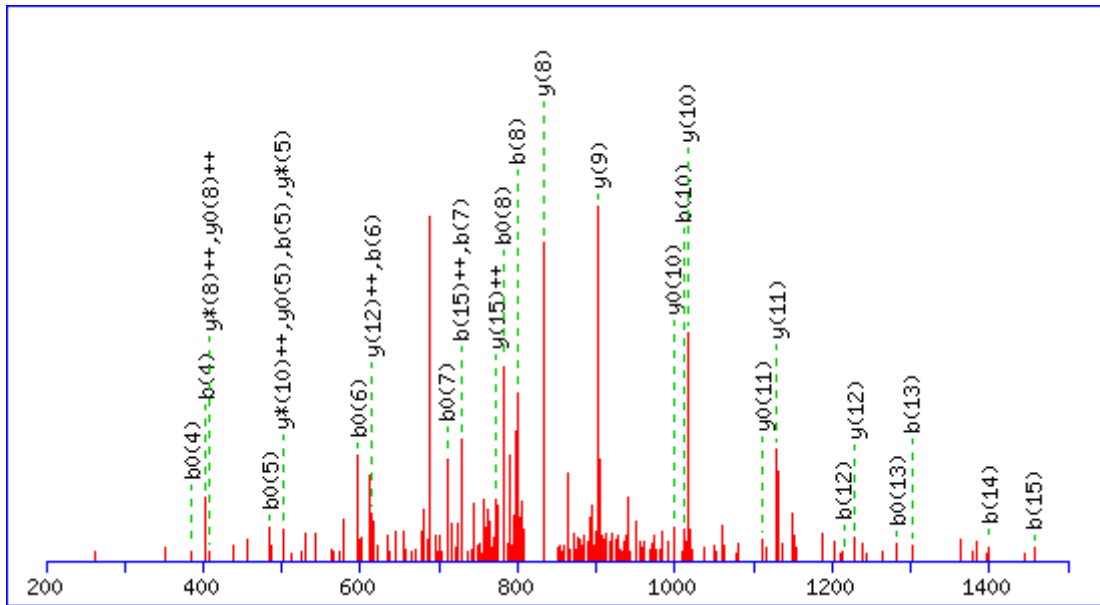

| #  | b              | b <sup>++</sup> | b <sup>0</sup> | b <sup>0++</sup> | Seq. | y              | y <sup>++</sup> | y <sup>*</sup> | y <sup>*++</sup> | y <sup>0</sup> | y <sup>0++</sup> | #  |
|----|----------------|-----------------|----------------|------------------|------|----------------|-----------------|----------------|------------------|----------------|------------------|----|
| 1  | 88.09          | 44.55           | 70.07          | 35.54            | S    |                |                 |                |                  |                |                  | 16 |
| 2  | 187.22         | 94.11           | 169.20         | 85.10            | V    | 1544.83        | <b>772.92</b>   | 1527.80        | 764.41           | 1526.82        | 763.91           | 15 |
| 3  | 288.32         | 144.66          | 270.30         | 135.66           | T    | 1445.70        | 723.36          | 1428.67        | 714.84           | 1427.69        | 714.35           | 14 |
| 4  | <b>403.41</b>  | 202.21          | <b>385.39</b>  | 193.20           | D    | 1344.60        | 672.80          | 1327.57        | 664.29           | 1326.58        | 663.80           | 13 |
| 5  | <b>502.54</b>  | 251.77          | <b>484.52</b>  | 242.77           | V    | <b>1229.51</b> | <b>615.26</b>   | 1212.48        | 606.74           | 1211.50        | 606.25           | 12 |
| 6  | <b>615.70</b>  | 308.35          | <b>597.68</b>  | 299.34           | I    | <b>1130.38</b> | 565.69          | 1113.35        | 557.18           | <b>1112.37</b> | 556.69           | 11 |
| 7  | <b>728.85</b>  | 364.93          | <b>710.84</b>  | 355.92           | I    | <b>1017.22</b> | 509.12          | 1000.19        | <b>500.60</b>    | <b>999.21</b>  | 500.11           | 10 |
| 8  | <b>799.93</b>  | 400.47          | <b>781.92</b>  | 391.46           | A    | <b>904.07</b>  | 452.54          | 887.04         | 444.02           | 886.05         | 443.53           | 9  |
| 9  | 897.05         | 449.03          | 879.03         | 440.02           | P    | <b>832.99</b>  | 417.00          | 815.96         | <b>408.48</b>    | 814.97         | <b>407.99</b>    | 8  |
| 10 | <b>1010.20</b> | 505.61          | 992.19         | 496.60           | L    | 735.87         | 368.44          | 718.84         | 359.93           | 717.86         | 359.43           | 7  |
| 11 | 1113.35        | 557.18          | 1095.33        | 548.17           | C    | 622.72         | 311.86          | 605.68         | 303.35           | 604.70         | 302.85           | 6  |
| 12 | <b>1214.45</b> | 607.73          | 1196.44        | 598.72           | T    | 519.57         | 260.29          | <b>502.54</b>  | 251.77           | <b>501.56</b>  | 251.28           | 5  |
| 13 | <b>1301.53</b> | 651.27          | <b>1283.51</b> | 642.26           | S    | 418.47         | 209.74          | 401.44         | 201.22           | 400.45         | 200.73           | 4  |
| 14 | <b>1400.66</b> | 700.83          | 1382.64        | 691.83           | V    | 331.39         | 166.20          | 314.36         | 157.68           |                |                  | 3  |
| 15 | <b>1457.71</b> | <b>729.36</b>   | 1439.70        | 720.35           | G    | 232.26         | 116.63          | 215.23         | 108.12           |                |                  | 2  |
| 16 |                |                 |                |                  | R    | 175.21         | 88.11           | 158.18         | 79.59            |                |                  | 1  |

Gene Symbol  
CD38

Sequences  
ANCFSPVSGDKPCCR

m/z  
919.70

Charge  
2+

Ion score  
73.8

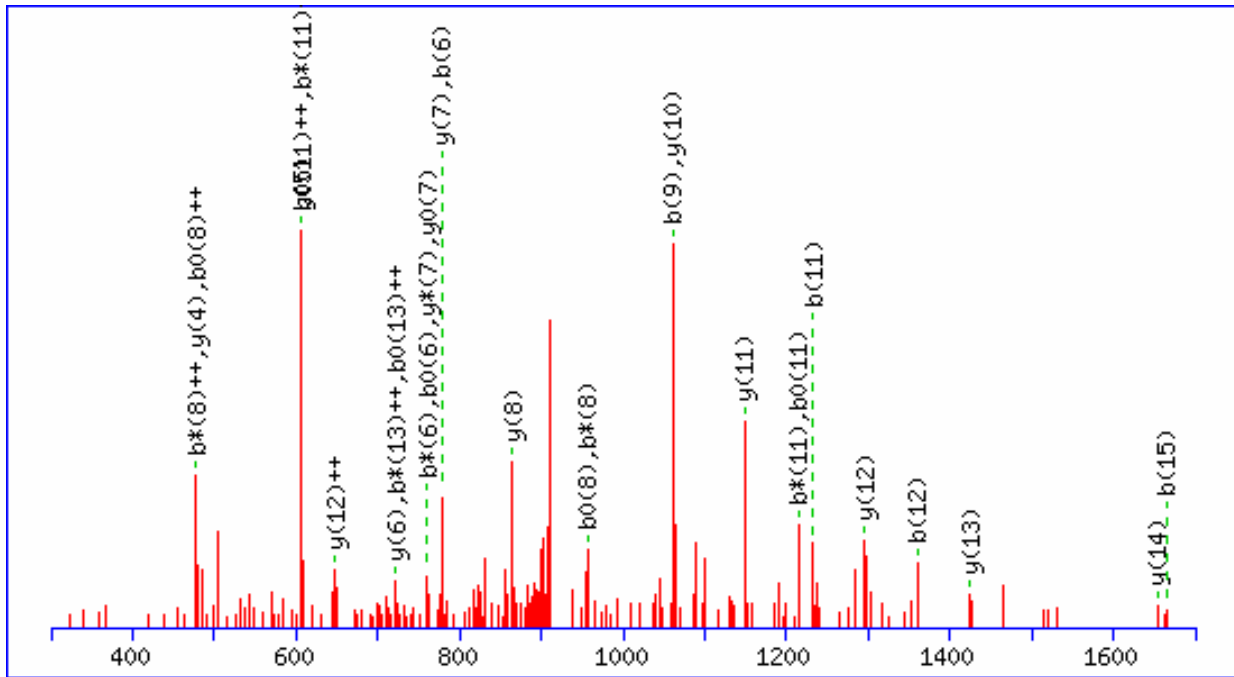

C3 : NEM (C)

| #  | b              | b <sup>++</sup> | b <sup>*</sup> | b <sup>*++</sup> | b <sup>0</sup> | b <sup>0++</sup> | Seq. | y              | y <sup>++</sup> | y <sup>*</sup> | y <sup>*++</sup> | y <sup>0</sup> | y <sup>0++</sup> | #  |
|----|----------------|-----------------|----------------|------------------|----------------|------------------|------|----------------|-----------------|----------------|------------------|----------------|------------------|----|
| 1  | 72.09          | 36.55           |                |                  |                |                  | A    |                |                 |                |                  |                |                  | 16 |
| 2  | 186.19         | 93.60           | 169.16         | 85.08            |                |                  | N    | 1767.98        | 884.49          | 1750.95        | 875.98           | 1749.97        | 875.49           | 15 |
| 3  | 414.46         | 207.73          | 397.43         | 199.22           |                |                  | C    | <b>1653.88</b> | 827.44          | 1636.85        | 818.93           | 1635.86        | 818.44           | 14 |
| 4  | 543.57         | 272.29          | 526.54         | 263.77           | 525.56         | 263.28           | E    | <b>1425.61</b> | 713.31          | 1408.58        | 704.79           | 1407.59        | 704.30           | 13 |
| 5  | 690.74         | 345.88          | 673.71         | 337.36           | 672.73         | 336.87           | F    | <b>1296.50</b> | <b>648.75</b>   | 1279.47        | 640.24           | 1278.48        | 639.74           | 12 |
| 6  | <b>777.82</b>  | 389.41          | <b>760.79</b>  | 380.90           | <b>759.81</b>  | 380.41           | S    | <b>1149.32</b> | 575.16          | 1132.29        | 566.65           | 1131.31        | 566.16           | 11 |
| 7  | 874.94         | 437.97          | 857.91         | 429.46           | 856.92         | 428.96           | P    | <b>1062.24</b> | 531.63          | 1045.21        | 523.11           | 1044.23        | 522.62           | 10 |
| 8  | 974.07         | 487.54          | <b>957.04</b>  | <b>479.02</b>    | <b>956.05</b>  | <b>478.53</b>    | V    | 965.13         | 483.07          | 948.10         | 474.55           | 947.11         | 474.06           | 9  |
| 9  | <b>1061.15</b> | 531.08          | 1044.11        | 522.56           | 1043.13        | 522.07           | S    | <b>866.00</b>  | 433.50          | 848.97         | 424.99           | 847.98         | 424.50           | 8  |
| 10 | 1118.20        | 559.60          | 1101.17        | 551.09           | 1100.18        | 550.59           | G    | <b>778.92</b>  | 389.96          | <b>761.89</b>  | 381.45           | <b>760.91</b>  | 380.96           | 7  |
| 11 | <b>1233.28</b> | 617.15          | <b>1216.25</b> | <b>608.63</b>    | <b>1215.27</b> | <b>608.14</b>    | D    | <b>721.87</b>  | 361.44          | 704.84         | 352.92           | 703.85         | 352.43           | 6  |
| 12 | <b>1361.46</b> | 681.23          | 1344.43        | 672.72           | 1343.44        | 672.22           | K    | <b>606.78</b>  | 303.90          | 589.75         | 295.38           |                |                  | 5  |
| 13 | 1458.57        | 729.79          | 1441.54        | <b>721.27</b>    | 1440.56        | <b>720.78</b>    | P    | <b>478.61</b>  | 239.81          | 461.58         | 231.29           |                |                  | 4  |
| 14 | 1561.71        | 781.36          | 1544.68        | 772.85           | 1543.70        | 772.35           | C    | 381.49         | 191.25          | 364.46         | 182.74           |                |                  | 3  |
| 15 | <b>1664.86</b> | 832.93          | 1647.83        | 824.42           | 1646.84        | 823.93           | C    | 278.35         | 139.68          | 261.32         | 131.16           |                |                  | 2  |
| 16 |                |                 |                |                  |                |                  | R    | 175.21         | 88.11           | 158.18         | 79.59            |                |                  | 1  |

Gene Symbol  
CD97

Sequences  
WACLVAGGSKYSEFTSTTSGTGHNQTR

m/z  
950.09

Charge  
3+

Ion score  
74.6

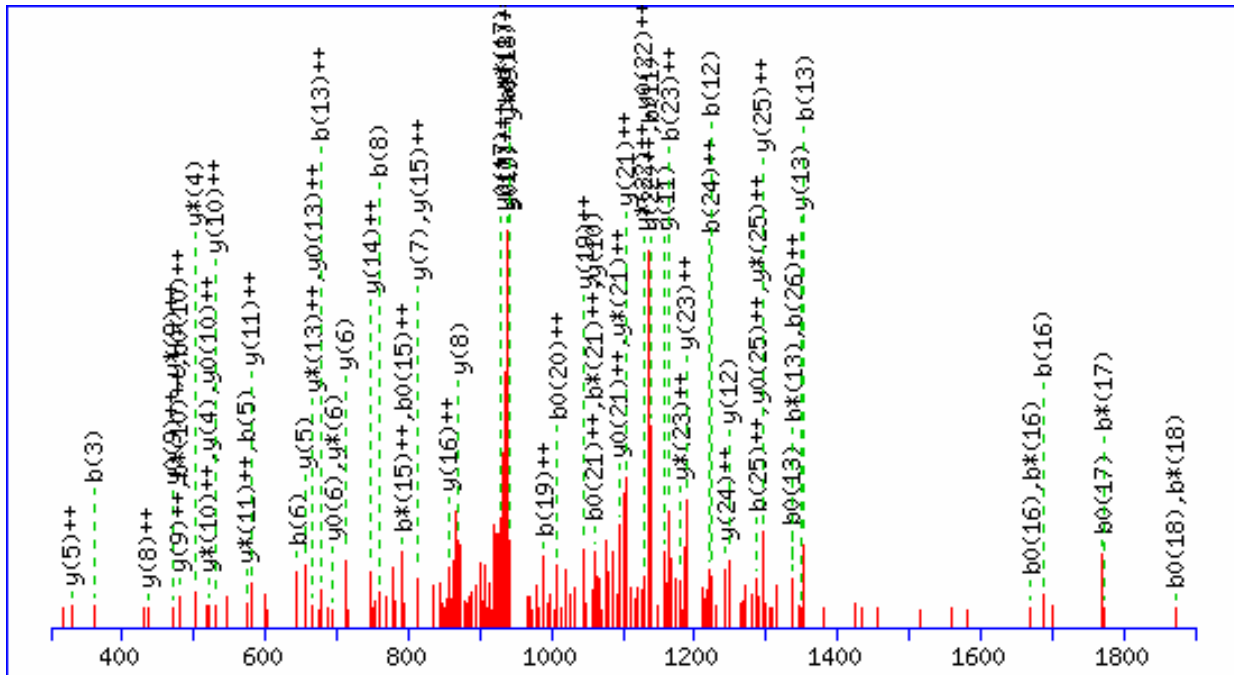

| #  | b       | b <sup>+</sup> | b <sup>+</sup> | b <sup>++</sup> | b <sup>0</sup> | b <sup>0++</sup> | Seq. | y       | y <sup>+</sup> | y <sup>+</sup> | y <sup>++</sup> | y <sup>0</sup> | y <sup>0++</sup> | #  |
|----|---------|----------------|----------------|-----------------|----------------|------------------|------|---------|----------------|----------------|-----------------|----------------|------------------|----|
| 1  | 187.22  | 94.11          |                |                 |                |                  | W    |         |                |                |                 |                |                  | 27 |
| 2  | 258.30  | 129.65         |                |                 |                |                  | A    | 2661.83 | 1331.42        | 2644.80        | 1322.91         | 2643.82        | 1322.41          | 26 |
| 3  | 361.44  | 181.22         |                |                 |                |                  | C    | 2590.76 | 1295.88        | 2573.73        | 1287.37         | 2572.74        | 1286.87          | 25 |
| 4  | 474.60  | 237.80         |                |                 |                |                  | L    | 2487.61 | 1244.31        | 2470.58        | 1235.80         | 2469.60        | 1235.30          | 24 |
| 5  | 573.73  | 287.37         |                |                 |                |                  | V    | 2374.46 | 1187.73        | 2357.43        | 1179.22         | 2356.44        | 1178.72          | 23 |
| 6  | 644.81  | 322.91         |                |                 |                |                  | A    | 2275.33 | 1138.17        | 2258.29        | 1129.65         | 2257.31        | 1129.16          | 22 |
| 7  | 701.86  | 351.43         |                |                 |                |                  | G    | 2204.25 | 1102.63        | 2187.22        | 1094.11         | 2186.23        | 1093.62          | 21 |
| 8  | 758.91  | 379.96         |                |                 |                |                  | G    | 2147.20 | 1074.10        | 2130.17        | 1065.59         | 2129.18        | 1065.09          | 20 |
| 9  | 845.99  | 423.50         |                |                 | 827.97         | 414.49           | S    | 2090.14 | 1045.58        | 2073.11        | 1037.06         | 2072.13        | 1036.57          | 19 |
| 10 | 974.16  | 487.58         | 957.13         | 479.07          | 956.14         | 478.58           | K    | 2003.07 | 1002.04        | 1986.04        | 993.52          | 1985.05        | 993.03           | 18 |
| 11 | 1137.33 | 569.17         | 1120.30        | 560.65          | 1119.32        | 560.16           | Y    | 1874.90 | 937.95         | 1857.86        | 929.44          | 1856.88        | 928.94           | 17 |
| 12 | 1224.41 | 612.71         | 1207.38        | 604.19          | 1206.39        | 603.70           | S    | 1711.72 | 856.36         | 1694.69        | 847.85          | 1693.71        | 847.36           | 16 |
| 13 | 1353.52 | 677.26         | 1336.49        | 668.75          | 1335.51        | 668.26           | E    | 1624.64 | 812.83         | 1607.61        | 804.31          | 1606.63        | 803.82           | 15 |
| 14 | 1500.70 | 750.85         | 1483.67        | 742.34          | 1482.68        | 741.84           | F    | 1495.53 | 748.27         | 1478.50        | 739.75          | 1477.52        | 739.26           | 14 |
| 15 | 1601.80 | 801.40         | 1584.77        | 792.89          | 1583.78        | 792.40           | T    | 1348.36 | 674.68         | 1331.33        | 666.17          | 1330.34        | 665.67           | 13 |
| 16 | 1688.88 | 844.94         | 1671.85        | 836.43          | 1670.86        | 835.93           | S    | 1247.25 | 624.13         | 1230.22        | 615.62          | 1229.24        | 615.12           | 12 |
| 17 | 1789.98 | 895.49         | 1772.95        | 886.98          | 1771.97        | 886.49           | T    | 1160.18 | 580.59         | 1143.14        | 572.08          | 1142.16        | 571.58           | 11 |
| 18 | 1891.08 | 946.05         | 1874.05        | 937.53          | 1873.07        | 937.04           | T    | 1059.07 | 530.04         | 1042.04        | 521.52          | 1041.06        | 521.03           | 10 |
| 19 | 1978.16 | 989.59         | 1961.13        | 981.07          | 1960.15        | 980.58           | S    | 957.97  | 479.49         | 940.94         | 470.97          | 939.95         | 470.48           | 9  |
| 20 | 2035.21 | 1018.11        | 2018.18        | 1009.60         | 2017.20        | 1009.10          | G    | 870.89  | 435.95         | 853.86         | 427.43          | 852.88         | 426.94           | 8  |
| 21 | 2136.32 | 1068.66        | 2119.29        | 1060.15         | 2118.30        | 1059.66          | T    | 813.84  | 407.42         | 796.81         | 398.91          | 795.82         | 398.42           | 7  |
| 22 | 2193.37 | 1097.19        | 2176.34        | 1088.67         | 2175.35        | 1088.18          | G    | 712.74  | 356.87         | 695.70         | 348.36          | 694.72         | 347.86           | 6  |
| 23 | 2330.51 | 1165.76        | 2313.48        | 1157.24         | 2312.49        | 1156.75          | H    | 655.68  | 328.35         | 638.65         | 319.83          | 637.67         | 319.34           | 5  |
| 24 | 2444.61 | 1222.81        | 2427.58        | 1214.29         | 2426.60        | 1213.80          | N    | 518.54  | 259.78         | 501.51         | 251.26          | 500.53         | 250.77           | 4  |
| 25 | 2572.74 | 1286.87        | 2555.71        | 1278.36         | 2554.72        | 1277.87          | Q    | 404.44  | 202.72         | 387.41         | 194.21          | 386.43         | 193.72           | 3  |
| 26 | 2673.84 | 1337.43        | 2656.81        | 1328.91         | 2655.83        | 1328.42          | T    | 276.31  | 138.66         | 259.28         | 130.15          | 258.30         | 129.65           | 2  |
| 27 |         |                |                |                 |                |                  | R    | 175.21  | 88.11          | 158.18         | 79.59           |                |                  | 1  |

Gene Symbol  
CDC42SE1

Sequences  
LGC**C**VVEK**P**QPK

m/z  
713.55

Charge  
2+

Ion score  
66.0

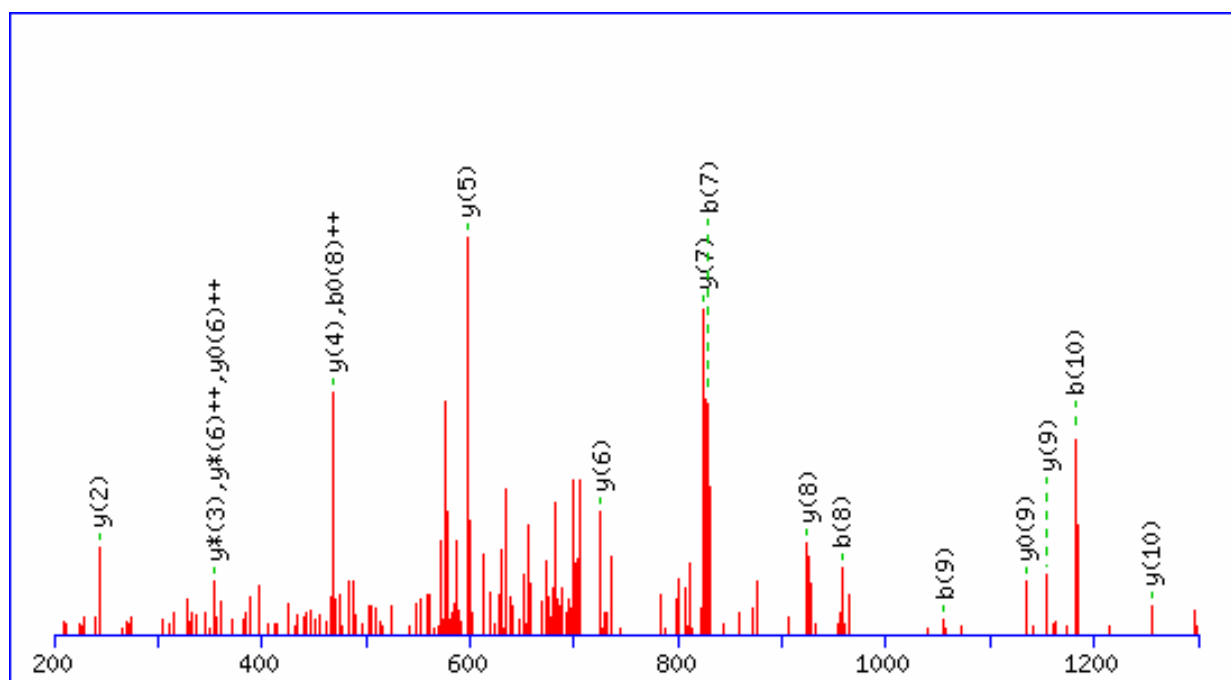

C4 : NEM (C)

| #  | b              | b <sup>++</sup> | b <sup>*</sup> | b <sup>***</sup> | b <sup>0</sup> | b <sup>0++</sup> | Seq. | y              | y <sup>++</sup> | y <sup>*</sup> | y <sup>***</sup> | y <sup>0</sup> | y <sup>0++</sup> | #  |
|----|----------------|-----------------|----------------|------------------|----------------|------------------|------|----------------|-----------------|----------------|------------------|----------------|------------------|----|
| 1  | 114.17         | 57.59           |                |                  |                |                  | L    |                |                 |                |                  |                |                  | 12 |
| 2  | 171.22         | 86.11           |                |                  |                |                  | G    | 1313.57        | 657.29          | 1296.54        | 648.77           | 1295.55        | 648.28           | 11 |
| 3  | 274.36         | 137.68          |                |                  |                |                  | C    | <b>1256.51</b> | 628.76          | 1239.48        | 620.25           | 1238.50        | 619.75           | 10 |
| 4  | 502.63         | 251.82          |                |                  |                |                  | C    | <b>1153.37</b> | 577.19          | 1136.34        | 568.67           | <b>1135.36</b> | 568.18           | 9  |
| 5  | 601.76         | 301.38          |                |                  |                |                  | V    | <b>925.10</b>  | 463.06          | 908.07         | 454.54           | 907.09         | 454.05           | 8  |
| 6  | 700.89         | 350.95          |                |                  |                |                  | V    | <b>825.97</b>  | 413.49          | 808.94         | 404.97           | 807.96         | 404.48           | 7  |
| 7  | <b>830.00</b>  | 415.51          |                |                  | 811.99         | 406.50           | E    | <b>726.84</b>  | 363.92          | 709.81         | <b>355.41</b>    | 708.83         | <b>354.92</b>    | 6  |
| 8  | <b>958.18</b>  | 479.59          | 941.15         | 471.08           | 940.16         | <b>470.58</b>    | K    | <b>597.73</b>  | 299.37          | 580.70         | 290.85           |                |                  | 5  |
| 9  | <b>1055.29</b> | 528.15          | 1038.26        | 519.63           | 1037.28        | 519.14           | P    | <b>469.56</b>  | 235.28          | 452.52         | 226.77           |                |                  | 4  |
| 10 | <b>1183.42</b> | 592.21          | 1166.39        | 583.70           | 1165.41        | 583.21           | Q    | 372.44         | 186.72          | <b>355.41</b>  | 178.21           |                |                  | 3  |
| 11 | 1280.54        | 640.77          | 1263.51        | 632.26           | 1262.52        | 631.76           | P    | <b>244.31</b>  | 122.66          | 227.28         | 114.14           |                |                  | 2  |
| 12 |                |                 |                |                  |                |                  | K    | 147.20         | 74.10           | 130.16         | 65.59            |                |                  | 1  |



Gene Symbol  
CDC42SE1

Sequences  
LGCCVVEKQPK

m/z  
713.62

Charge  
2+

Ion score  
74.3

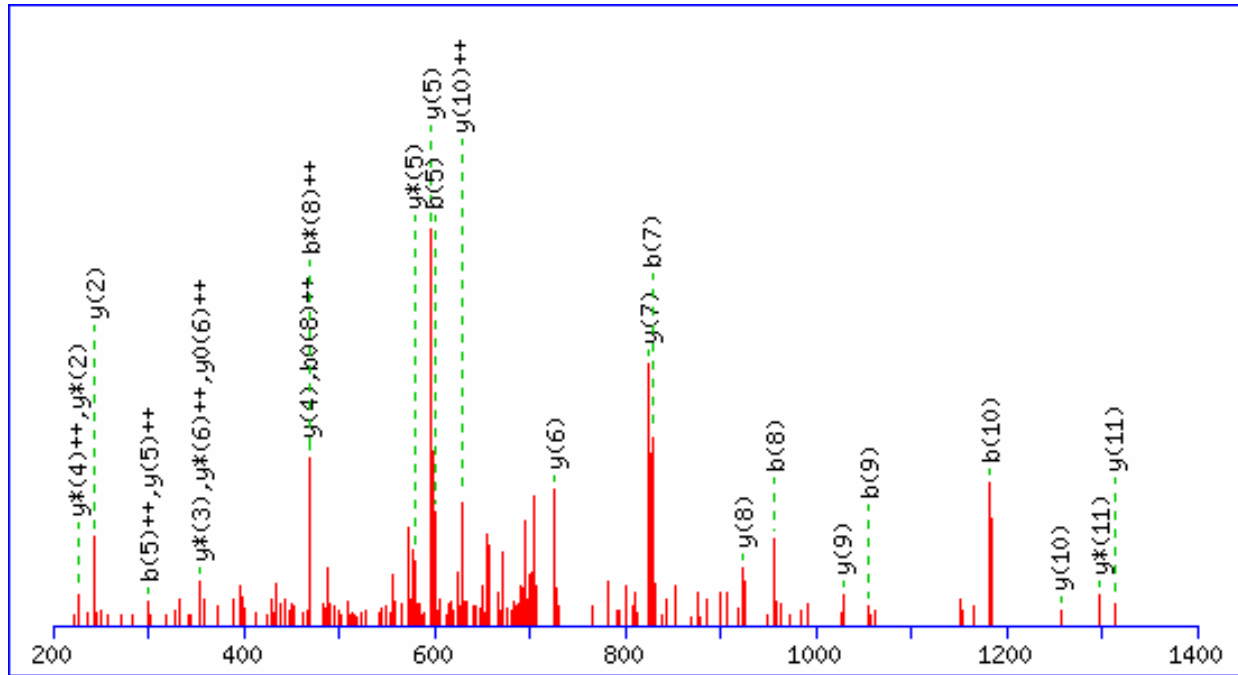

C3 : NEM (C)

| #  | b       | b <sup>++</sup> | b <sup>*</sup> | b <sup>*++</sup> | b <sup>0</sup> | b <sup>0++</sup> | Seq. | y       | y <sup>++</sup> | y <sup>*</sup> | y <sup>*++</sup> | y <sup>0</sup> | y <sup>0++</sup> | #  |
|----|---------|-----------------|----------------|------------------|----------------|------------------|------|---------|-----------------|----------------|------------------|----------------|------------------|----|
| 1  | 114.17  | 57.59           |                |                  |                |                  | L    |         |                 |                |                  |                |                  | 12 |
| 2  | 171.22  | 86.11           |                |                  |                |                  | G    | 1313.57 | 657.29          | 1296.54        | 648.77           | 1295.55        | 648.28           | 11 |
| 3  | 399.49  | 200.25          |                |                  |                |                  | C    | 1256.51 | 628.76          | 1239.48        | 620.25           | 1238.50        | 619.75           | 10 |
| 4  | 502.63  | 251.82          |                |                  |                |                  | C    | 1028.25 | 514.63          | 1011.22        | 506.11           | 1010.23        | 505.62           | 9  |
| 5  | 601.76  | 301.38          |                |                  |                |                  | V    | 925.10  | 463.06          | 908.07         | 454.54           | 907.09         | 454.05           | 8  |
| 6  | 700.89  | 350.95          |                |                  |                |                  | V    | 825.97  | 413.49          | 808.94         | 404.97           | 807.96         | 404.48           | 7  |
| 7  | 830.00  | 415.51          |                |                  | 811.99         | 406.50           | E    | 726.84  | 363.92          | 709.81         | 355.41           | 708.83         | 354.92           | 6  |
| 8  | 958.18  | 479.59          | 941.15         | 471.08           | 940.16         | 470.58           | K    | 597.73  | 299.37          | 580.70         | 290.85           |                |                  | 5  |
| 9  | 1055.29 | 528.15          | 1038.26        | 519.63           | 1037.28        | 519.14           | P    | 469.56  | 235.28          | 452.52         | 226.77           |                |                  | 4  |
| 10 | 1183.42 | 592.21          | 1166.39        | 583.70           | 1165.41        | 583.21           | Q    | 372.44  | 186.72          | 355.41         | 178.21           |                |                  | 3  |
| 11 | 1280.54 | 640.77          | 1263.51        | 632.26           | 1262.52        | 631.76           | P    | 244.31  | 122.66          | 227.28         | 114.14           |                |                  | 2  |
| 12 |         |                 |                |                  |                |                  | K    | 147.20  | 74.10           | 130.16         | 65.59            |                |                  | 1  |

Gene Symbol  
CDC42SE1

Sequences  
LGCCVVEKPPK

m/z  
650.96

Charge  
2+

Ion score  
59.6

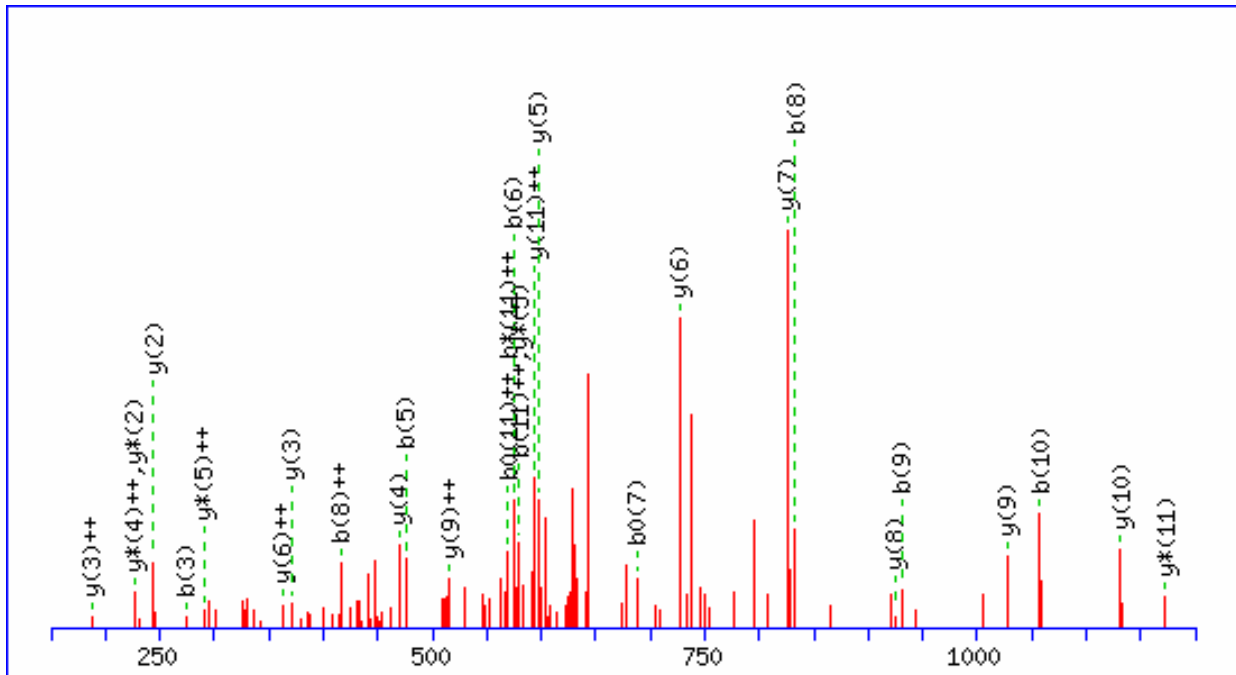

| #  | b       | b <sup>++</sup> | b <sup>*</sup> | b <sup>+++</sup> | b <sup>0</sup> | b <sup>0++</sup> | Seq. | y       | y <sup>++</sup> | y <sup>*</sup> | y <sup>+++</sup> | y <sup>0</sup> | y <sup>0++</sup> | #  |
|----|---------|-----------------|----------------|------------------|----------------|------------------|------|---------|-----------------|----------------|------------------|----------------|------------------|----|
| 1  | 114.17  | 57.59           |                |                  |                |                  | L    |         |                 |                |                  |                |                  | 12 |
| 2  | 171.22  | 86.11           |                |                  |                |                  | G    | 1188.44 | 594.72          | 1171.41        | 586.21           | 1170.43        | 585.72           | 11 |
| 3  | 274.36  | 137.68          |                |                  |                |                  | C    | 1131.39 | 566.20          | 1114.36        | 557.68           | 1113.37        | 557.19           | 10 |
| 4  | 377.50  | 189.26          |                |                  |                |                  | C    | 1028.25 | 514.63          | 1011.22        | 506.11           | 1010.23        | 505.62           | 9  |
| 5  | 476.63  | 238.82          |                |                  |                |                  | V    | 925.10  | 463.06          | 908.07         | 454.54           | 907.09         | 454.05           | 8  |
| 6  | 575.76  | 288.39          |                |                  |                |                  | V    | 825.97  | 413.49          | 808.94         | 404.97           | 807.96         | 404.48           | 7  |
| 7  | 704.88  | 352.94          |                |                  | 686.86         | 343.94           | E    | 726.84  | 363.92          | 709.81         | 355.41           | 708.83         | 354.92           | 6  |
| 8  | 833.05  | 417.03          | 816.02         | 408.51           | 815.04         | 408.02           | K    | 597.73  | 299.37          | 580.70         | 290.85           |                |                  | 5  |
| 9  | 930.17  | 465.59          | 913.14         | 457.07           | 912.15         | 456.58           | P    | 469.56  | 235.28          | 452.52         | 226.77           |                |                  | 4  |
| 10 | 1058.30 | 529.65          | 1041.27        | 521.14           | 1040.28        | 520.64           | Q    | 372.44  | 186.72          | 355.41         | 178.21           |                |                  | 3  |
| 11 | 1155.41 | 578.21          | 1138.38        | 569.69           | 1137.40        | 569.20           | P    | 244.31  | 122.66          | 227.28         | 114.14           |                |                  | 2  |
| 12 |         |                 |                |                  |                |                  | K    | 147.20  | 74.10           | 130.16         | 65.59            |                |                  | 1  |

Gene Symbol  
CKAP4

Sequences  
SSSSSSASAAAAAAAASSSASCSR

m/z  
1017.10

Charge  
2+

Ion score  
182.1

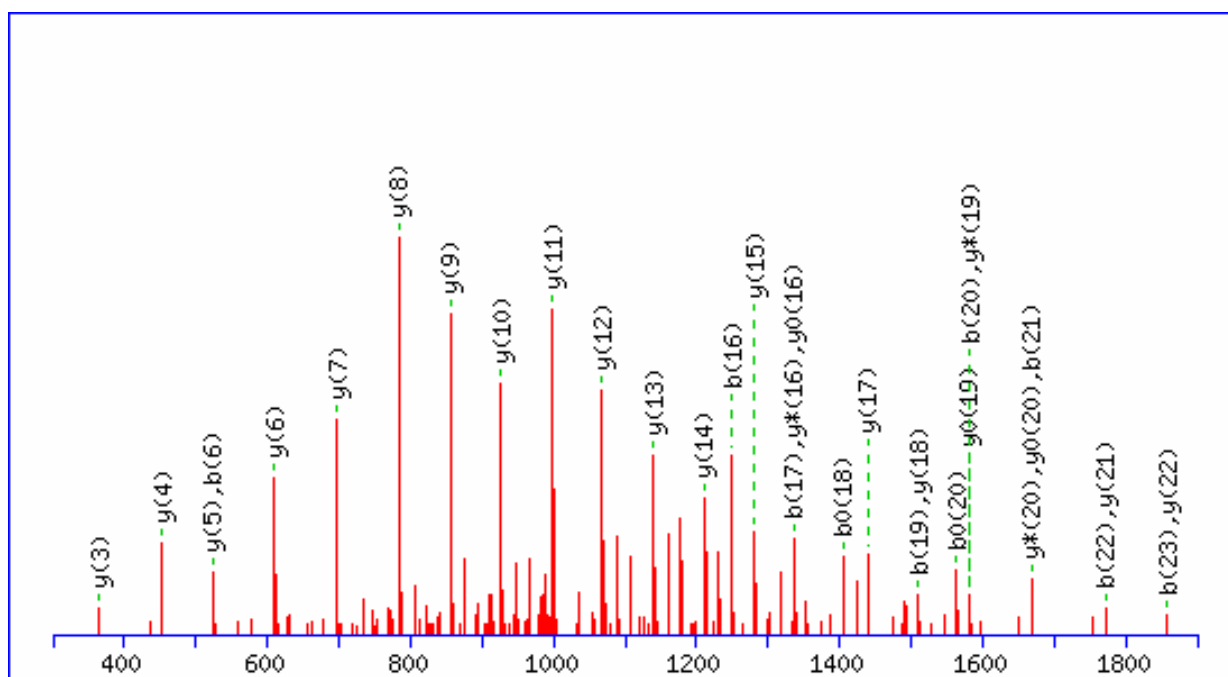

| #  | b              | b <sup>++</sup> | b <sup>0</sup> | b <sup>0++</sup> | Seq. | y              | y <sup>++</sup> | y <sup>*</sup> | y <sup>+++</sup> | y <sup>0</sup> | y <sup>0++</sup> | #  |
|----|----------------|-----------------|----------------|------------------|------|----------------|-----------------|----------------|------------------|----------------|------------------|----|
| 1  | 88.09          | 44.55           | 70.07          | 35.54            | S    |                |                 |                |                  |                |                  | 24 |
| 2  | 175.16         | 88.09           | 157.15         | 79.08            | S    | 1946.98        | 973.99          | 1929.95        | 965.48           | 1928.97        | 964.99           | 23 |
| 3  | 262.24         | 131.62          | 244.22         | 122.62           | S    | <b>1859.90</b> | 930.46          | 1842.87        | 921.94           | 1841.89        | 921.45           | 22 |
| 4  | 349.32         | 175.16          | 331.30         | 166.15           | S    | <b>1772.83</b> | 886.92          | 1755.80        | 878.40           | 1754.81        | 877.91           | 21 |
| 5  | 436.39         | 218.70          | 418.38         | 209.69           | S    | 1685.75        | 843.38          | <b>1668.72</b> | 834.86           | <b>1667.73</b> | 834.37           | 20 |
| 6  | <b>523.47</b>  | 262.24          | 505.46         | 253.23           | S    | 1598.67        | 799.84          | <b>1581.64</b> | 791.32           | <b>1580.66</b> | 790.83           | 19 |
| 7  | 594.55         | 297.78          | 576.53         | 288.77           | A    | <b>1511.59</b> | 756.30          | 1494.56        | 747.79           | 1493.58        | 747.29           | 18 |
| 8  | 681.63         | 341.32          | 663.61         | 332.31           | S    | <b>1440.52</b> | 720.76          | 1423.49        | 712.25           | 1422.50        | 711.75           | 17 |
| 9  | 752.70         | 376.86          | 734.69         | 367.85           | A    | 1353.44        | 677.22          | <b>1336.41</b> | 668.71           | <b>1335.42</b> | 668.22           | 16 |
| 10 | 823.78         | 412.40          | 805.77         | 403.39           | A    | <b>1282.36</b> | 641.68          | 1265.33        | 633.17           | 1264.35        | 632.68           | 15 |
| 11 | 894.86         | 447.93          | 876.85         | 438.93           | A    | <b>1211.28</b> | 606.15          | 1194.25        | 597.63           | 1193.27        | 597.14           | 14 |
| 12 | 965.94         | 483.47          | 947.92         | 474.47           | A    | <b>1140.21</b> | 570.61          | 1123.18        | 562.09           | 1122.19        | 561.60           | 13 |
| 13 | 1037.02        | 519.01          | 1019.00        | 510.00           | A    | <b>1069.13</b> | 535.07          | 1052.10        | 526.55           | 1051.11        | 526.06           | 12 |
| 14 | 1108.09        | 554.55          | 1090.08        | 545.54           | A    | <b>998.05</b>  | 499.53          | 981.02         | 491.01           | 980.03         | 490.52           | 11 |
| 15 | 1179.17        | 590.09          | 1161.16        | 581.08           | A    | <b>926.97</b>  | 463.99          | 909.94         | 455.47           | 908.96         | 454.98           | 10 |
| 16 | <b>1250.25</b> | 625.63          | 1232.23        | 616.62           | A    | <b>855.89</b>  | 428.45          | 838.86         | 419.94           | 837.88         | 419.44           | 9  |
| 17 | <b>1337.33</b> | 669.17          | 1319.31        | 660.16           | S    | <b>784.82</b>  | 392.91          | 767.79         | 384.40           | 766.80         | 383.90           | 8  |
| 18 | 1424.40        | 712.71          | <b>1406.39</b> | 703.70           | S    | <b>697.74</b>  | 349.37          | 680.71         | 340.86           | 679.72         | 340.37           | 7  |
| 19 | <b>1511.48</b> | 756.24          | 1493.47        | 747.24           | S    | <b>610.66</b>  | 305.83          | 593.63         | 297.32           | 592.65         | 296.83           | 6  |
| 20 | <b>1582.56</b> | 791.78          | <b>1564.54</b> | 782.78           | A    | <b>523.58</b>  | 262.30          | 506.55         | 253.78           | 505.57         | 253.29           | 5  |
| 21 | <b>1669.64</b> | 835.32          | 1651.62        | 826.31           | S    | <b>452.51</b>  | 226.76          | 435.48         | 218.24           | 434.49         | 217.75           | 4  |
| 22 | <b>1772.78</b> | 886.89          | 1754.76        | 877.89           | C    | <b>365.43</b>  | 183.22          | 348.40         | 174.70           | 347.41         | 174.21           | 3  |
| 23 | <b>1859.86</b> | 930.43          | 1841.84        | 921.43           | S    | 262.29         | 131.65          | 245.26         | 123.13           | 244.27         | 122.64           | 2  |
| 24 |                |                 |                |                  | R    | 175.21         | 88.11           | 158.18         | 79.59            |                |                  | 1  |

Gene Symbol  
CORO1C

Sequences  
K**C**EPHMTVPR

m/z  
643.99

Charge  
2+

Ion score  
66.3

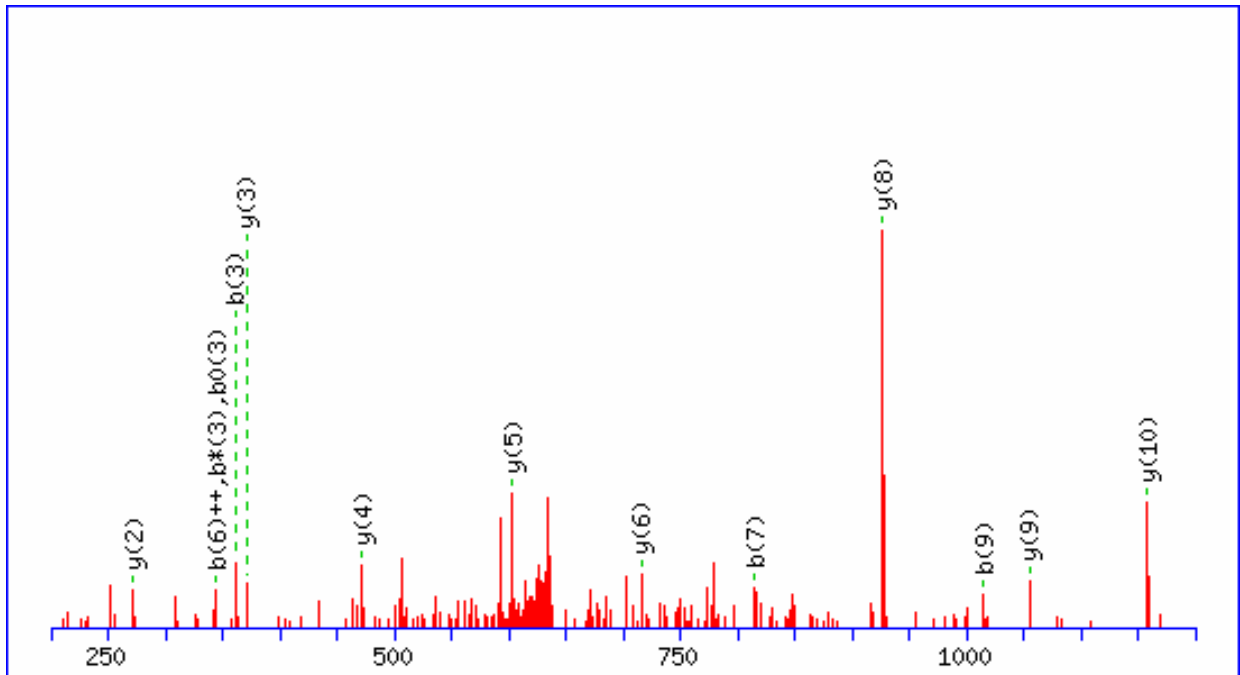

| #  | b       | b <sup>++</sup> | b*      | b <sup>+++</sup> | b <sup>0</sup> | b <sup>0++</sup> | Seq. | y       | y <sup>++</sup> | y*      | y <sup>+++</sup> | y <sup>0</sup> | y <sup>0++</sup> | #  |
|----|---------|-----------------|---------|------------------|----------------|------------------|------|---------|-----------------|---------|------------------|----------------|------------------|----|
| 1  | 129.18  | 65.09           | 112.15  | 56.58            |                |                  | K    |         |                 |         |                  |                |                  | 11 |
| 2  | 232.32  | 116.67          | 215.29  | 108.15           |                |                  | C    | 1159.44 | 580.23          | 1142.41 | 571.71           | 1141.43        | 571.22           | 10 |
| 3  | 361.44  | 181.22          | 344.41  | 172.71           | 343.42         | 172.21           | E    | 1056.30 | 528.65          | 1039.27 | 520.14           | 1038.28        | 519.65           | 9  |
| 4  | 458.55  | 229.78          | 441.52  | 221.26           | 440.54         | 220.77           | P    | 927.19  | 464.10          | 910.16  | 455.58           | 909.17         | 455.09           | 8  |
| 5  | 571.71  | 286.36          | 554.68  | 277.84           | 553.69         | 277.35           | I    | 830.07  | 415.54          | 813.04  | 407.02           | 812.06         | 406.53           | 7  |
| 6  | 684.87  | 342.94          | 667.84  | 334.42           | 666.85         | 333.93           | I    | 716.91  | 358.96          | 699.88  | 350.45           | 698.90         | 349.95           | 6  |
| 7  | 816.06  | 408.54          | 799.03  | 400.02           | 798.05         | 399.53           | M    | 603.76  | 302.38          | 586.72  | 293.87           | 585.74         | 293.37           | 5  |
| 8  | 917.17  | 459.09          | 900.14  | 450.57           | 899.15         | 450.08           | T    | 472.56  | 236.78          | 455.53  | 228.27           | 454.54         | 227.78           | 4  |
| 9  | 1016.30 | 508.65          | 999.27  | 500.14           | 998.28         | 499.65           | V    | 371.46  | 186.23          | 354.42  | 177.72           |                |                  | 3  |
| 10 | 1113.41 | 557.21          | 1096.38 | 548.70           | 1095.40        | 548.20           | P    | 272.32  | 136.67          | 255.29  | 128.15           |                |                  | 2  |
| 11 |         |                 |         |                  |                |                  | R    | 175.21  | 88.11           | 158.18  | 79.59            |                |                  | 1  |

Gene Symbol  
CSTB

Sequences  
MMCGAPSATQPATAETQHIADQVR

m/z  
1278.82

Charge  
2+

Ion score  
83.5

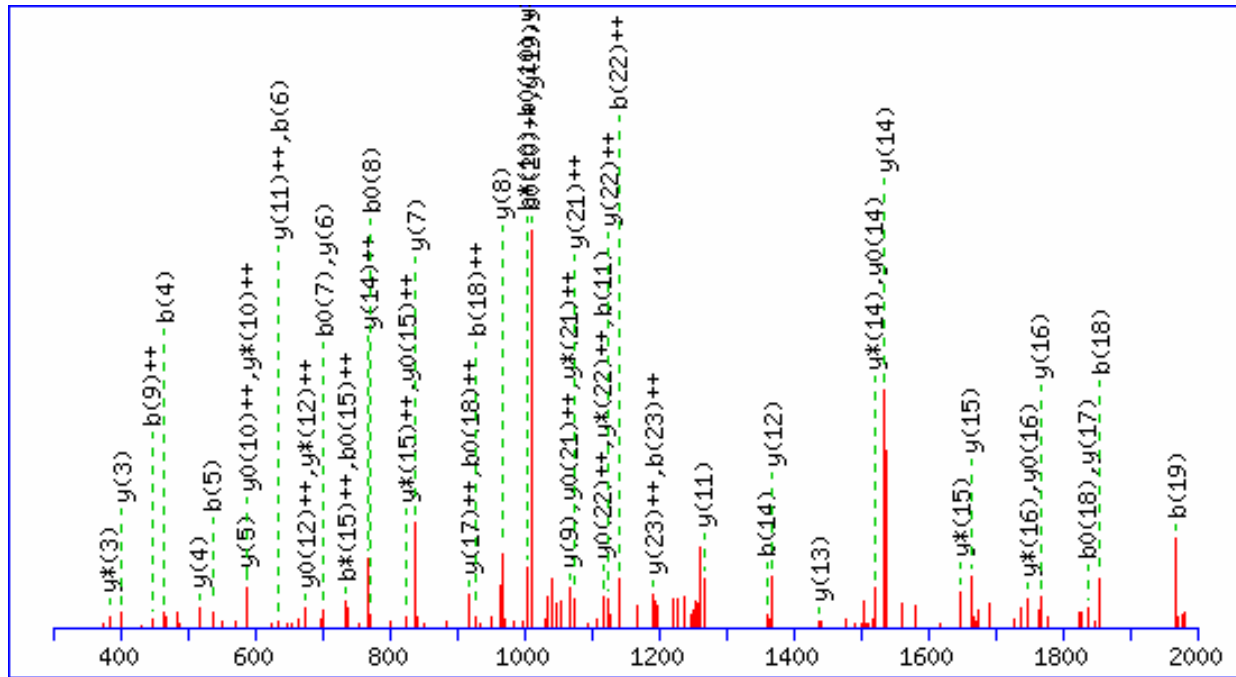

N-term : N-Acetyl (Protein)

| #  | b       | b <sup>++</sup> | b <sup>+</sup> | b <sup>+++</sup> | b <sup>0</sup> | b <sup>0++</sup> | Seq. | y       | y <sup>++</sup> | y <sup>+</sup> | y <sup>+++</sup> | y <sup>0</sup> | y <sup>0++</sup> | #  |
|----|---------|-----------------|----------------|------------------|----------------|------------------|------|---------|-----------------|----------------|------------------|----------------|------------------|----|
| 1  | 174.24  | 87.62           |                |                  |                |                  | M    |         |                 |                |                  |                |                  | 24 |
| 2  | 305.44  | 153.22          |                |                  |                |                  | M    | 2384.63 | 1192.82         | 2367.59        | 1184.30          | 2366.61        | 1183.81          | 23 |
| 3  | 408.58  | 204.79          |                |                  |                |                  | C    | 2253.43 | 1127.22         | 2236.40        | 1118.70          | 2235.41        | 1118.21          | 22 |
| 4  | 465.63  | 233.32          |                |                  |                |                  | G    | 2150.29 | 1075.65         | 2133.26        | 1067.13          | 2132.27        | 1066.64          | 21 |
| 5  | 536.71  | 268.86          |                |                  |                |                  | A    | 2093.23 | 1047.12         | 2076.20        | 1038.61          | 2075.22        | 1038.11          | 20 |
| 6  | 633.82  | 317.42          |                |                  |                |                  | P    | 2022.16 | 1011.58         | 2005.13        | 1003.07          | 2004.14        | 1002.57          | 19 |
| 7  | 720.90  | 360.95          |                |                  | 702.89         | 351.95           | S    | 1925.04 | 963.02          | 1908.01        | 954.51           | 1907.03        | 954.02           | 18 |
| 8  | 791.98  | 396.49          |                |                  | 773.96         | 387.49           | A    | 1837.96 | 919.49          | 1820.93        | 910.97           | 1819.95        | 910.48           | 17 |
| 9  | 893.08  | 447.05          |                |                  | 875.07         | 438.04           | T    | 1766.89 | 883.95          | 1749.86        | 875.43           | 1748.87        | 874.94           | 16 |
| 10 | 1021.21 | 511.11          | 1004.18        | 502.59           | 1003.20        | 502.10           | Q    | 1665.78 | 833.40          | 1648.75        | 824.88           | 1647.77        | 824.39           | 15 |
| 11 | 1118.33 | 559.67          | 1101.30        | 551.15           | 1100.31        | 550.66           | P    | 1537.65 | 769.33          | 1520.62        | 760.82           | 1519.64        | 760.32           | 14 |
| 12 | 1189.41 | 595.21          | 1172.37        | 586.69           | 1171.39        | 586.20           | A    | 1440.54 | 720.77          | 1423.51        | 712.26           | 1422.52        | 711.77           | 13 |
| 13 | 1290.51 | 645.76          | 1273.48        | 637.24           | 1272.49        | 636.75           | T    | 1369.46 | 685.23          | 1352.43        | 676.72           | 1351.45        | 676.23           | 12 |
| 14 | 1361.59 | 681.30          | 1344.56        | 672.78           | 1343.57        | 672.29           | A    | 1268.36 | 634.68          | 1251.33        | 626.17           | 1250.34        | 625.67           | 11 |
| 15 | 1490.70 | 745.85          | 1473.67        | 737.34           | 1472.69        | 736.85           | E    | 1197.28 | 599.14          | 1180.25        | 590.63           | 1179.26        | 590.14           | 10 |
| 16 | 1591.81 | 796.41          | 1574.77        | 787.89           | 1573.79        | 787.40           | T    | 1068.16 | 534.59          | 1051.13        | 526.07           | 1050.15        | 525.58           | 9  |
| 17 | 1719.93 | 860.47          | 1702.90        | 851.96           | 1701.92        | 851.46           | Q    | 967.06  | 484.03          | 950.03         | 475.52           | 949.05         | 475.03           | 8  |
| 18 | 1857.07 | 929.04          | 1840.04        | 920.53           | 1839.06        | 920.03           | H    | 838.93  | 419.97          | 821.90         | 411.45           | 820.92         | 410.96           | 7  |
| 19 | 1970.23 | 985.62          | 1953.20        | 977.10           | 1952.22        | 976.61           | I    | 701.79  | 351.40          | 684.76         | 342.88           | 683.78         | 342.39           | 6  |
| 20 | 2041.31 | 1021.16         | 2024.28        | 1012.64          | 2023.29        | 1012.15          | A    | 588.63  | 294.82          | 571.60         | 286.31           | 570.62         | 285.81           | 5  |
| 21 | 2156.40 | 1078.70         | 2139.37        | 1070.19          | 2138.38        | 1069.69          | D    | 517.56  | 259.28          | 500.53         | 250.77           | 499.54         | 250.27           | 4  |
| 22 | 2284.53 | 1142.77         | 2267.50        | 1134.25          | 2266.51        | 1133.76          | Q    | 402.47  | 201.74          | 385.44         | 193.22           |                |                  | 3  |
| 23 | 2383.66 | 1192.33         | 2366.63        | 1183.82          | 2365.64        | 1183.32          | V    | 274.34  | 137.67          | 257.31         | 129.16           |                |                  | 2  |
| 24 |         |                 |                |                  |                |                  | R    | 175.21  | 88.11           | 158.18         | 79.59            |                |                  | 1  |

Gene Symbol  
CTNND1

Sequences  
YQE AAPNV ANNTG PHAAS **C**FGAK

m/z  
1159.80

Charge  
2+

Ion score  
113.9

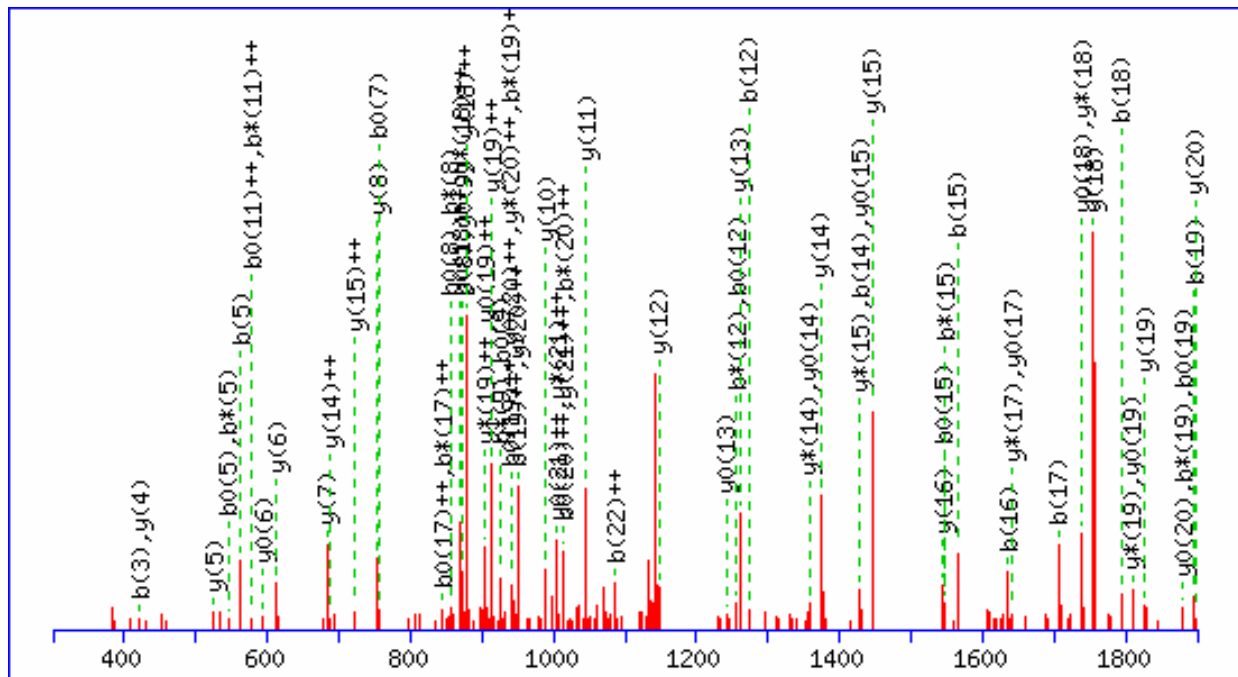

| #  | b              | b <sup>++</sup> | b <sup>+</sup> | b <sup>*++</sup> | b <sup>0</sup> | b <sup>0++</sup> | Seq. | y              | y <sup>++</sup> | y <sup>+</sup> | y <sup>*++</sup> | y <sup>0</sup> | y <sup>0++</sup> | #  |
|----|----------------|-----------------|----------------|------------------|----------------|------------------|------|----------------|-----------------|----------------|------------------|----------------|------------------|----|
| 1  | 164.18         | 82.59           |                |                  |                |                  | Y    |                |                 |                |                  |                |                  | 23 |
| 2  | 292.31         | 146.66          | 275.28         | 138.14           |                |                  | Q    | 2156.32        | 1078.66         | 2139.28        | 1070.15          | 2138.30        | 1069.65          | 22 |
| 3  | <b>421.42</b>  | 211.22          | 404.39         | 202.70           | 403.41         | 202.21           | E    | 2028.19        | <b>1014.60</b>  | 2011.16        | <b>1006.08</b>   | 2010.17        | <b>1005.59</b>   | 21 |
| 4  | 492.50         | 246.76          | 475.47         | 238.24           | 474.49         | 237.75           | A    | <b>1899.07</b> | <b>950.04</b>   | 1882.04        | <b>941.52</b>    | <b>1881.06</b> | <b>941.03</b>    | 20 |
| 5  | <b>563.58</b>  | 282.29          | <b>546.55</b>  | 273.78           | <b>545.56</b>  | 273.29           | A    | <b>1827.99</b> | <b>914.50</b>   | <b>1810.96</b> | <b>905.99</b>    | <b>1809.98</b> | <b>905.49</b>    | 19 |
| 6  | 660.70         | 330.85          | 643.66         | 322.34           | 642.68         | 321.84           | P    | <b>1756.92</b> | <b>878.96</b>   | <b>1739.89</b> | <b>870.45</b>    | <b>1738.90</b> | <b>869.95</b>    | 18 |
| 7  | 774.80         | 387.90          | 757.77         | 379.39           | <b>756.78</b>  | 378.90           | N    | 1659.80        | 830.40          | <b>1642.77</b> | 821.89           | <b>1641.79</b> | 821.40           | 17 |
| 8  | <b>873.93</b>  | 437.47          | <b>856.90</b>  | 428.95           | <b>855.91</b>  | 428.46           | V    | <b>1545.70</b> | 773.35          | 1528.67        | 764.84           | 1527.68        | 764.35           | 16 |
| 9  | 945.01         | 473.01          | <b>927.98</b>  | 464.49           | <b>926.99</b>  | 464.00           | A    | <b>1446.57</b> | <b>723.79</b>   | <b>1429.54</b> | 715.27           | <b>1428.55</b> | 714.78           | 15 |
| 10 | 1059.11        | 530.06          | 1042.08        | 521.54           | 1041.09        | 521.05           | N    | <b>1375.49</b> | <b>688.25</b>   | <b>1358.46</b> | 679.73           | <b>1357.47</b> | 679.24           | 14 |
| 11 | 1173.21        | 587.11          | 1156.18        | <b>578.59</b>    | 1155.20        | <b>578.10</b>    | N    | <b>1261.39</b> | 631.20          | 1244.36        | 622.68           | <b>1243.37</b> | 622.19           | 13 |
| 12 | <b>1274.32</b> | 637.66          | <b>1257.29</b> | 629.15           | <b>1256.30</b> | 628.65           | T    | <b>1147.28</b> | 574.15          | 1130.25        | 565.63           | 1129.27        | 565.14           | 12 |
| 13 | 1331.37        | 666.19          | 1314.34        | 657.67           | 1313.35        | 657.18           | G    | <b>1046.18</b> | 523.59          | 1029.15        | 515.08           | 1028.17        | 514.59           | 11 |
| 14 | <b>1428.48</b> | 714.75          | 1411.45        | 706.23           | 1410.47        | 705.74           | P    | <b>989.13</b>  | 495.07          | 972.10         | 486.55           | 971.11         | 486.06           | 10 |
| 15 | <b>1565.62</b> | 783.31          | <b>1548.59</b> | 774.80           | <b>1547.61</b> | 774.31           | H    | 892.01         | 446.51          | 874.98         | 438.00           | <b>874.00</b>  | 437.50           | 9  |
| 16 | <b>1636.70</b> | 818.85          | 1619.67        | 810.34           | 1618.68        | 809.85           | A    | <b>754.87</b>  | 377.94          | 737.84         | 369.43           | 736.86         | 368.93           | 8  |
| 17 | <b>1707.78</b> | 854.39          | 1690.75        | <b>845.88</b>    | 1689.76        | <b>845.39</b>    | A    | <b>683.80</b>  | 342.40          | 666.77         | 333.89           | 665.78         | 333.39           | 7  |
| 18 | <b>1794.86</b> | 897.93          | 1777.82        | 889.42           | 1776.84        | 888.92           | S    | <b>612.72</b>  | 306.86          | 595.69         | 298.35           | <b>594.70</b>  | 297.86           | 6  |
| 19 | <b>1898.00</b> | <b>949.50</b>   | <b>1880.97</b> | <b>940.99</b>    | <b>1879.98</b> | <b>940.50</b>    | C    | <b>525.64</b>  | 263.32          | 508.61         | 254.81           |                |                  | 5  |
| 20 | 2045.17        | 1023.09         | 2028.14        | <b>1014.57</b>   | 2027.16        | <b>1014.08</b>   | F    | <b>422.50</b>  | 211.75          | 405.47         | 203.24           |                |                  | 4  |
| 21 | 2102.22        | 1051.62         | 2085.19        | 1043.10          | 2084.21        | 1042.61          | G    | 275.32         | 138.17          | 258.29         | 129.65           |                |                  | 3  |
| 22 | 2173.30        | <b>1087.15</b>  | 2156.27        | 1078.64          | 2155.29        | 1078.15          | A    | 218.27         | 109.64          | 201.24         | 101.13           |                |                  | 2  |
| 23 |                |                 |                |                  |                |                  | K    | 147.20         | 74.10           | 130.17         | 65.59            |                |                  | 1  |

Gene Symbol  
DDX3X

Sequences  
VRPCVVYGGADIGQQIRDLR

m/z  
587.02

Charge  
4+

Ion score  
70.5

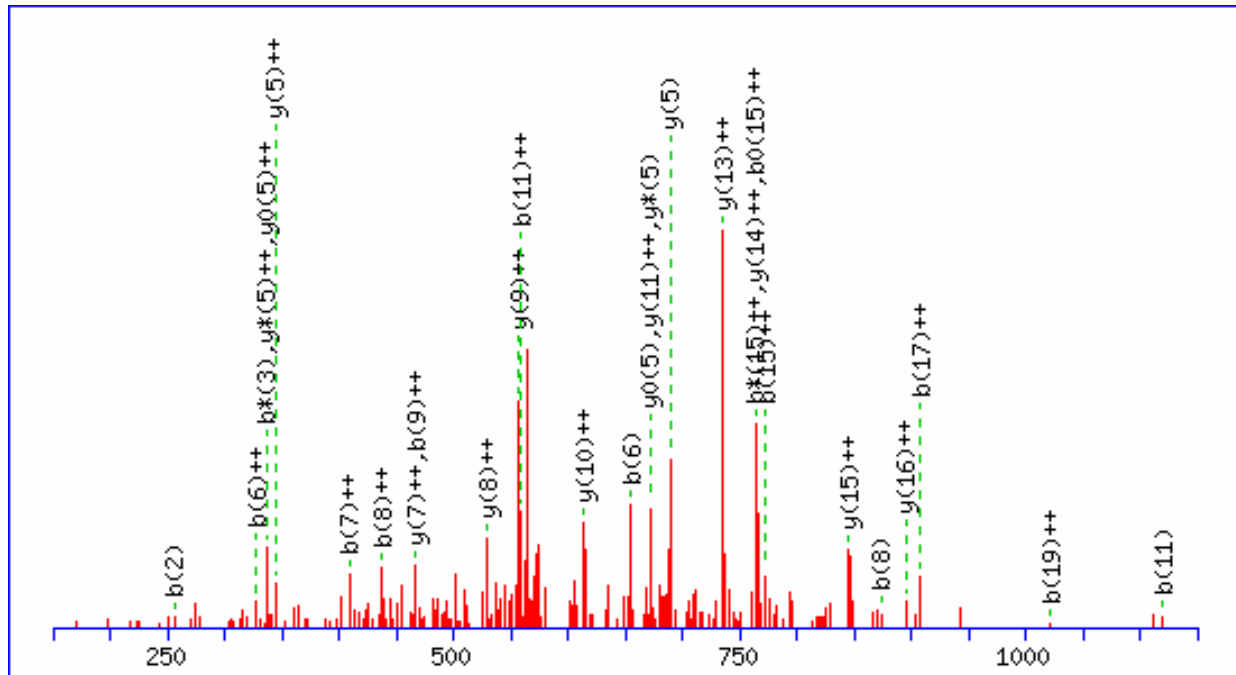

| #  | b              | b <sup>++</sup> | b <sup>+</sup> | b <sup>+++</sup> | b <sup>0</sup> | b <sup>0++</sup> | Seq. | y             | y <sup>++</sup> | y <sup>+</sup> | y <sup>+++</sup> | y <sup>0</sup> | y <sup>0++</sup> | #  |
|----|----------------|-----------------|----------------|------------------|----------------|------------------|------|---------------|-----------------|----------------|------------------|----------------|------------------|----|
| 1  | 100.14         | 50.57           |                |                  |                |                  | V    |               |                 |                |                  |                |                  | 21 |
| 2  | <b>256.32</b>  | 128.67          | 239.29         | 120.15           |                |                  | R    | 2246.53       | 1123.77         | 2229.50        | 1115.25          | 2228.51        | 1114.76          | 20 |
| 3  | 353.44         | 177.22          | <b>336.41</b>  | 168.71           |                |                  | P    | 2090.34       | 1045.67         | 2073.31        | 1037.16          | 2072.32        | 1036.67          | 19 |
| 4  | 456.58         | 228.80          | 439.55         | 220.28           |                |                  | C    | 1993.22       | 997.12          | 1976.19        | 988.60           | 1975.21        | 988.11           | 18 |
| 5  | 555.71         | 278.36          | 538.68         | 269.85           |                |                  | V    | 1890.08       | 945.54          | 1873.05        | 937.03           | 1872.07        | 936.54           | 17 |
| 6  | <b>654.85</b>  | <b>327.93</b>   | 637.81         | 319.41           |                |                  | V    | 1790.95       | <b>895.98</b>   | 1773.92        | 887.46           | 1772.94        | 886.97           | 16 |
| 7  | 818.02         | <b>409.51</b>   | 800.99         | 401.00           |                |                  | Y    | 1691.82       | <b>846.41</b>   | 1674.79        | 837.90           | 1673.80        | 837.41           | 15 |
| 8  | <b>875.07</b>  | <b>438.04</b>   | 858.04         | 429.52           |                |                  | G    | 1528.65       | <b>764.83</b>   | 1511.62        | 756.31           | 1510.63        | 755.82           | 14 |
| 9  | 932.12         | <b>466.56</b>   | 915.09         | 458.05           |                |                  | G    | 1471.60       | <b>736.30</b>   | 1454.56        | 727.79           | 1453.58        | 727.29           | 13 |
| 10 | 1003.20        | 502.10          | 986.17         | 493.59           |                |                  | A    | 1414.54       | 707.78          | 1397.51        | 699.26           | 1396.53        | 698.77           | 12 |
| 11 | <b>1118.29</b> | <b>559.65</b>   | 1101.26        | 551.13           | 1100.27        | 550.64           | D    | 1343.47       | <b>672.24</b>   | 1326.44        | 663.72           | 1325.45        | 663.23           | 11 |
| 12 | 1231.44        | 616.23          | 1214.41        | 607.71           | 1213.43        | 607.22           | I    | 1228.38       | <b>614.69</b>   | 1211.35        | 606.18           | 1210.36        | 605.69           | 10 |
| 13 | 1288.50        | 644.75          | 1271.46        | 636.24           | 1270.48        | 635.74           | G    | 1115.22       | <b>558.11</b>   | 1098.19        | 549.60           | 1097.21        | 549.11           | 9  |
| 14 | 1416.62        | 708.82          | 1399.59        | 700.30           | 1398.61        | 699.81           | Q    | 1058.17       | <b>529.59</b>   | 1041.14        | 521.07           | 1040.15        | 520.58           | 8  |
| 15 | 1544.75        | <b>772.88</b>   | 1527.72        | <b>764.37</b>    | 1526.74        | <b>763.87</b>    | Q    | 930.04        | <b>465.52</b>   | 913.01         | 457.01           | 912.03         | 456.52           | 7  |
| 16 | 1657.91        | 829.46          | 1640.88        | 820.94           | 1639.90        | 820.45           | I    | 801.91        | 401.46          | 784.88         | 392.94           | 783.90         | 392.45           | 6  |
| 17 | 1814.10        | <b>907.55</b>   | 1797.07        | 899.04           | 1796.08        | 898.54           | R    | <b>688.75</b> | <b>344.88</b>   | <b>671.72</b>  | <b>336.37</b>    | <b>670.74</b>  | <b>335.87</b>    | 5  |
| 18 | 1929.18        | 965.10          | 1912.15        | 956.58           | 1911.17        | 956.09           | D    | 532.57        | 266.79          | 515.54         | 258.27           | 514.55         | 257.78           | 4  |
| 19 | 2042.34        | <b>1021.67</b>  | 2025.31        | 1013.16          | 2024.33        | 1012.67          | L    | 417.48        | 209.24          | 400.45         | 200.73           | 399.47         | 200.24           | 3  |
| 20 | 2171.46        | 1086.23         | 2154.43        | 1077.72          | 2153.44        | 1077.22          | E    | 304.32        | 152.67          | 287.29         | 144.15           | 286.31         | 143.66           | 2  |
| 21 |                |                 |                |                  |                |                  | R    | 175.21        | 88.11           | 158.18         | 79.59            |                |                  | 1  |

Gene Symbol  
DHX9

Sequences  
DKDDGGEDDDAN**C**NLICGDEYGPETR

m/z  
1019.59

Charge  
3+

Ion score  
75.0

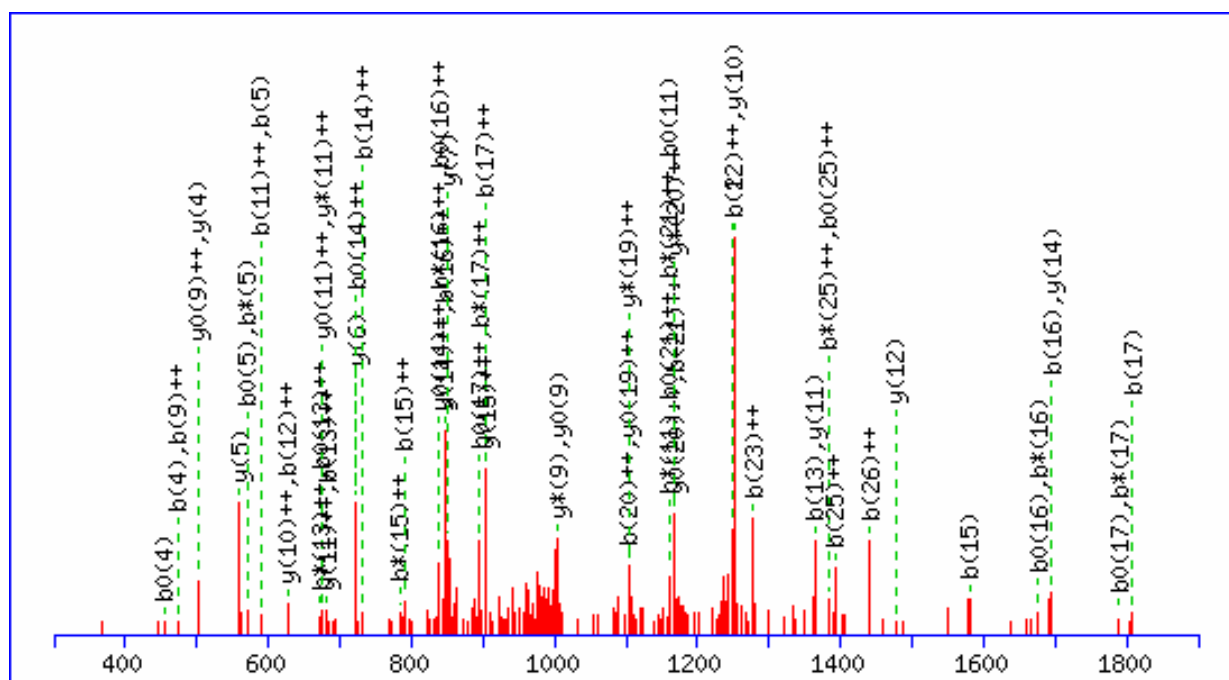

C18 : NEM (C)

| #  | b              | b <sup>+</sup> | b <sup>+</sup> | b <sup>++</sup> | b <sup>0</sup> | b <sup>0++</sup> | Seq. | y              | y <sup>+</sup> | y <sup>+</sup> | y <sup>++</sup> | y <sup>0</sup> | y <sup>0++</sup> | #  |
|----|----------------|----------------|----------------|-----------------|----------------|------------------|------|----------------|----------------|----------------|-----------------|----------------|------------------|----|
| 1  | 116.10         | 58.55          |                |                 | 98.08          | 49.54            | D    |                |                |                |                 |                |                  | 27 |
| 2  | 244.27         | 122.64         | 227.24         | 114.12          | 226.25         | 113.63           | K    | 2942.94        | 1471.97        | 2925.91        | 1463.46         | 2924.93        | 1462.97          | 26 |
| 3  | 359.36         | 180.18         | 342.32         | 171.67          | 341.34         | 171.17           | D    | 2814.77        | 1407.89        | 2797.74        | 1399.37         | 2796.75        | 1398.88          | 25 |
| 4  | <b>474.44</b>  | 237.73         | 457.41         | 229.21          | <b>456.43</b>  | 228.72           | D    | 2699.68        | 1350.35        | 2682.65        | 1341.83         | 2681.67        | 1341.34          | 24 |
| 5  | <b>589.53</b>  | 295.27         | <b>572.50</b>  | 286.75          | <b>571.51</b>  | 286.26           | D    | 2584.59        | 1292.80        | 2567.56        | 1284.29         | 2566.58        | 1283.79          | 23 |
| 6  | 646.58         | 323.79         | 629.55         | 315.28          | 628.57         | 314.79           | G    | 2469.51        | 1235.26        | 2452.48        | 1226.74         | 2451.49        | 1226.25          | 22 |
| 7  | 703.63         | 352.32         | 686.60         | 343.80          | 685.62         | 343.31           | G    | 2412.46        | 1206.73        | 2395.43        | 1198.22         | 2394.44        | 1197.72          | 21 |
| 8  | 832.75         | 416.88         | 815.72         | 408.36          | 814.73         | 407.87           | E    | 2355.40        | 1178.21        | 2338.37        | <b>1169.69</b>  | 2337.39        | <b>1169.20</b>   | 20 |
| 9  | 947.83         | <b>474.42</b>  | 930.80         | 465.91          | 929.82         | 465.41           | D    | 2226.29        | 1113.65        | 2209.26        | <b>1105.13</b>  | 2208.28        | <b>1104.64</b>   | 19 |
| 10 | 1062.92        | 531.96         | 1045.89        | 523.45          | 1044.91        | 522.96           | D    | 2111.20        | 1056.11        | 2094.17        | 1047.59         | 2093.19        | 1047.10          | 18 |
| 11 | 1178.01        | <b>589.51</b>  | <b>1160.98</b> | 580.99          | <b>1159.99</b> | 580.50           | D    | 1996.12        | 998.56         | 1979.09        | 990.05          | 1978.10        | 989.55           | 17 |
| 12 | <b>1249.09</b> | <b>625.05</b>  | 1232.06        | 616.53          | 1231.07        | 616.04           | A    | 1881.03        | 941.02         | 1864.00        | 932.50          | 1863.01        | 932.01           | 16 |
| 13 | <b>1363.19</b> | <b>682.10</b>  | 1346.16        | <b>673.58</b>   | 1345.17        | <b>673.09</b>    | N    | 1809.95        | <b>905.48</b>  | 1792.92        | 896.96          | 1791.94        | 896.47           | 15 |
| 14 | 1466.33        | <b>733.67</b>  | 1449.30        | 725.15          | 1448.32        | <b>724.66</b>    | C    | <b>1695.85</b> | <b>848.43</b>  | 1678.82        | 839.91          | 1677.83        | <b>839.42</b>    | 14 |
| 15 | <b>1580.43</b> | <b>790.72</b>  | 1563.40        | <b>782.21</b>   | 1562.42        | 781.71           | N    | 1592.71        | 796.86         | 1575.67        | 788.34          | 1574.69        | 787.85           | 13 |
| 16 | <b>1693.59</b> | <b>847.30</b>  | <b>1676.56</b> | <b>838.78</b>   | <b>1675.58</b> | <b>838.29</b>    | L    | <b>1478.60</b> | 739.81         | 1461.57        | 731.29          | 1460.59        | 730.80           | 12 |
| 17 | <b>1806.75</b> | <b>903.88</b>  | <b>1789.72</b> | <b>895.36</b>   | <b>1788.73</b> | <b>894.87</b>    | I    | <b>1365.45</b> | <b>683.23</b>  | 1348.41        | <b>674.71</b>   | 1347.43        | <b>674.22</b>    | 11 |
| 18 | 2035.02        | 1018.01        | 2017.99        | 1009.50         | 2017.00        | 1009.01          | C    | <b>1252.29</b> | <b>626.65</b>  | 1235.26        | 618.13          | 1234.27        | 617.64           | 10 |
| 19 | 2092.07        | 1046.54        | 2075.04        | 1038.02         | 2074.05        | 1037.53          | G    | 1024.02        | 512.51         | <b>1006.99</b> | 504.00          | <b>1006.00</b> | <b>503.51</b>    | 9  |
| 20 | 2207.16        | <b>1104.08</b> | 2190.13        | 1095.57         | 2189.14        | 1095.07          | D    | 966.97         | 483.99         | 949.94         | 475.47          | 948.95         | 474.98           | 8  |
| 21 | 2336.27        | <b>1168.64</b> | 2319.24        | <b>1160.12</b>  | 2318.26        | <b>1159.63</b>   | E    | <b>851.88</b>  | 426.44         | 834.85         | 417.93          | 833.87         | 417.44           | 7  |
| 22 | 2499.44        | <b>1250.23</b> | 2482.41        | 1241.71         | 2481.43        | 1241.22          | Y    | <b>722.77</b>  | 361.89         | 705.74         | 353.37          | 704.75         | 352.88           | 6  |
| 23 | 2556.50        | <b>1278.75</b> | 2539.46        | 1270.24         | 2538.48        | 1269.74          | G    | <b>559.59</b>  | 280.30         | 542.56         | 271.79          | 541.58         | 271.29           | 5  |
| 24 | 2653.61        | 1327.31        | 2636.58        | 1318.79         | 2635.60        | 1318.30          | P    | <b>502.54</b>  | 251.77         | 485.51         | 243.26          | 484.53         | 242.77           | 4  |
| 25 | 2782.72        | <b>1391.87</b> | 2765.69        | <b>1383.35</b>  | 2764.71        | <b>1382.86</b>   | E    | 405.43         | 203.22         | 388.40         | 194.70          | 387.41         | 194.21           | 3  |
| 26 | 2883.83        | <b>1442.42</b> | 2866.80        | 1433.90         | 2865.81        | 1433.41          | T    | 276.31         | 138.66         | 259.28         | 130.15          | 258.30         | 129.65           | 2  |
| 27 |                |                |                |                 |                |                  | R    | 175.21         | 88.11          | 158.18         | 79.59           |                |                  | 1  |



Gene Symbol  
DPYSL2

Sequences  
AITIANQTN**C**PLYITK

m/z  
882.60

Charge  
2+

Ion score  
79.1

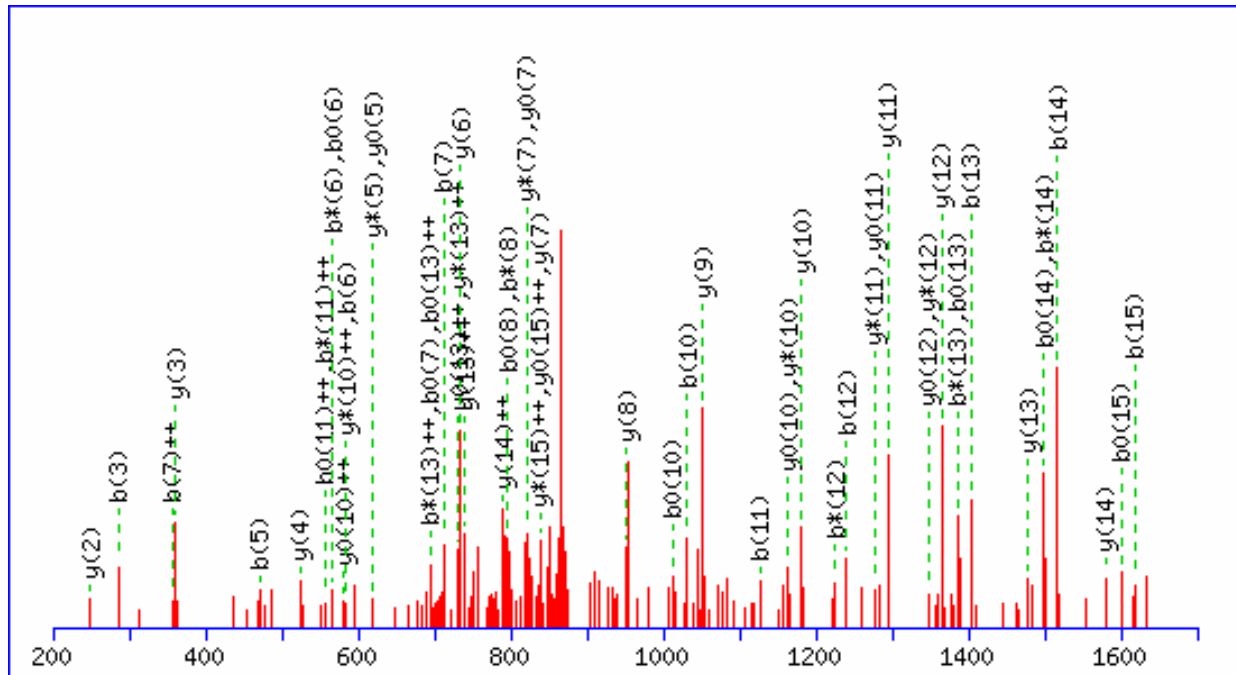

| #  | b              | b <sup>++</sup> | b <sup>*</sup> | b <sup>*++</sup> | b <sup>0</sup> | b <sup>0++</sup> | Seq. | y              | y <sup>++</sup> | y <sup>*</sup> | y <sup>*++</sup> | y <sup>0</sup> | y <sup>0++</sup> | #  |
|----|----------------|-----------------|----------------|------------------|----------------|------------------|------|----------------|-----------------|----------------|------------------|----------------|------------------|----|
| 1  | 72.09          | 36.55           |                |                  |                |                  | A    |                |                 |                |                  |                |                  | 16 |
| 2  | 185.24         | 93.13           |                |                  |                |                  | I    | 1693.98        | 847.49          | 1676.95        | <b>838.98</b>    | 1675.97        | <b>838.49</b>    | 15 |
| 3  | <b>286.35</b>  | 143.68          |                |                  | 268.33         | 134.67           | T    | <b>1580.82</b> | <b>790.92</b>   | 1563.79        | 782.40           | 1562.81        | 781.91           | 14 |
| 4  | 399.50         | 200.26          |                |                  | 381.49         | 191.25           | I    | <b>1479.72</b> | <b>740.36</b>   | 1462.69        | <b>731.85</b>    | 1461.70        | <b>731.36</b>    | 13 |
| 5  | <b>470.58</b>  | 235.80          |                |                  | 452.57         | 226.79           | A    | <b>1366.56</b> | 683.79          | <b>1349.53</b> | 675.27           | <b>1348.55</b> | 674.78           | 12 |
| 6  | <b>584.69</b>  | 292.85          | <b>567.65</b>  | 284.33           | <b>566.67</b>  | 283.84           | N    | <b>1295.48</b> | 648.25          | <b>1278.45</b> | 639.73           | <b>1277.47</b> | 639.24           | 11 |
| 7  | <b>712.81</b>  | <b>356.91</b>   | 695.78         | 348.40           | <b>694.80</b>  | 347.90           | Q    | <b>1181.38</b> | 591.19          | <b>1164.35</b> | <b>582.68</b>    | <b>1163.37</b> | <b>582.19</b>    | 10 |
| 8  | 813.92         | 407.46          | <b>796.89</b>  | 398.95           | <b>795.90</b>  | 398.46           | T    | <b>1053.25</b> | 527.13          | 1036.22        | 518.61           | 1035.24        | 518.12           | 9  |
| 9  | 928.02         | 464.51          | 910.99         | 456.00           | 910.01         | 455.51           | N    | <b>952.15</b>  | 476.58          | 935.12         | 468.06           | 934.13         | 467.57           | 8  |
| 10 | <b>1031.16</b> | 516.09          | 1014.13        | 507.57           | <b>1013.15</b> | 507.08           | C    | <b>838.05</b>  | 419.53          | <b>821.02</b>  | 411.01           | <b>820.03</b>  | 410.52           | 7  |
| 11 | <b>1128.28</b> | 564.64          | 1111.25        | <b>556.13</b>    | 1110.26        | <b>555.64</b>    | P    | <b>734.90</b>  | 367.96          | 717.87         | 359.44           | 716.89         | 358.95           | 6  |
| 12 | <b>1241.44</b> | 621.22          | <b>1224.41</b> | 612.71           | 1223.42        | 612.21           | L    | 637.79         | 319.40          | <b>620.76</b>  | 310.88           | <b>619.77</b>  | 310.39           | 5  |
| 13 | <b>1404.61</b> | 702.81          | <b>1387.58</b> | <b>694.29</b>    | <b>1386.59</b> | <b>693.80</b>    | Y    | <b>524.63</b>  | 262.82          | 507.60         | 254.30           | 506.62         | 253.81           | 4  |
| 14 | <b>1517.77</b> | 759.39          | <b>1500.74</b> | 750.87           | <b>1499.75</b> | 750.38           | I    | <b>361.46</b>  | 181.23          | 344.43         | 172.72           | 343.44         | 172.22           | 3  |
| 15 | <b>1618.87</b> | 809.94          | 1601.84        | 801.42           | <b>1600.86</b> | 800.93           | T    | <b>248.30</b>  | 124.65          | 231.27         | 116.14           | 230.28         | 115.65           | 2  |
| 16 |                |                 |                |                  |                |                  | K    | 147.20         | 74.10           | 130.16         | 65.59            |                |                  | 1  |

Gene Symbol  
EDIL3

Sequences  
CSGPLGIEGGHISNQITASSTR

m/z  
809.61

Charge  
3+

Ion score  
99.1

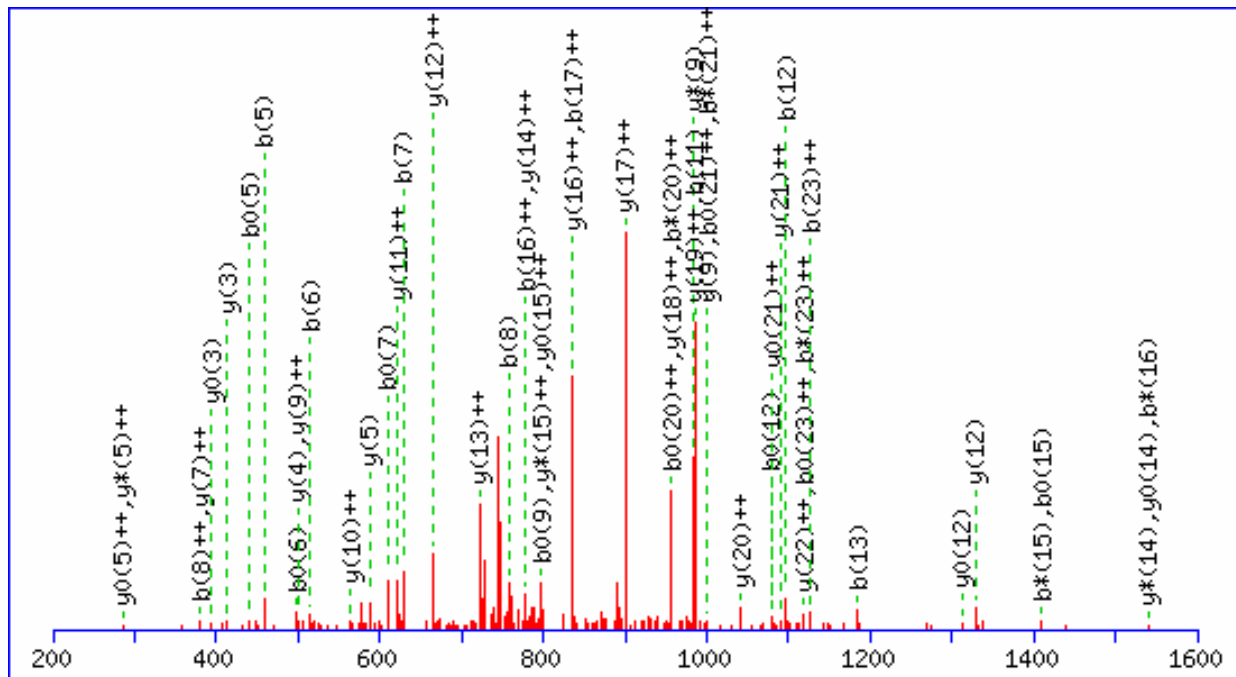

| #  | b       | b <sup>++</sup> | b <sup>+</sup> | b <sup>+++</sup> | b <sup>0</sup> | b <sup>0++</sup> | Seq. | y       | y <sup>++</sup> | y <sup>+</sup> | y <sup>+++</sup> | y <sup>0</sup> | y <sup>0++</sup> | #  |
|----|---------|-----------------|----------------|------------------|----------------|------------------|------|---------|-----------------|----------------|------------------|----------------|------------------|----|
| 1  | 104.15  | 52.58           |                |                  |                |                  | C    |         |                 |                |                  |                |                  | 24 |
| 2  | 191.23  | 96.12           |                |                  | 173.21         | 87.11            | S    | 2324.53 | 1162.77         | 2307.50        | 1154.25          | 2306.51        | 1153.76          | 23 |
| 3  | 248.28  | 124.64          |                |                  | 230.26         | 115.64           | G    | 2237.45 | 1119.23         | 2220.42        | 1110.71          | 2219.43        | 1110.22          | 22 |
| 4  | 345.39  | 173.20          |                |                  | 327.38         | 164.19           | P    | 2180.40 | 1090.70         | 2163.37        | 1082.19          | 2162.38        | 1081.70          | 21 |
| 5  | 458.55  | 229.78          |                |                  | 440.54         | 220.77           | L    | 2083.28 | 1042.15         | 2066.25        | 1033.63          | 2065.27        | 1033.14          | 20 |
| 6  | 515.60  | 258.31          |                |                  | 497.59         | 249.30           | G    | 1970.13 | 985.57          | 1953.09        | 977.05           | 1952.11        | 976.56           | 19 |
| 7  | 628.76  | 314.88          |                |                  | 610.75         | 305.88           | I    | 1913.07 | 957.04          | 1896.04        | 948.53           | 1895.06        | 948.03           | 18 |
| 8  | 757.88  | 379.44          |                |                  | 739.86         | 370.43           | E    | 1799.92 | 900.46          | 1782.89        | 891.95           | 1781.90        | 891.45           | 17 |
| 9  | 814.93  | 407.97          |                |                  | 796.91         | 398.96           | G    | 1670.80 | 835.91          | 1653.77        | 827.39           | 1652.79        | 826.90           | 16 |
| 10 | 871.98  | 436.49          |                |                  | 853.96         | 427.49           | G    | 1613.75 | 807.38          | 1596.72        | 798.86           | 1595.74        | 798.37           | 15 |
| 11 | 985.14  | 493.07          |                |                  | 967.12         | 484.06           | I    | 1556.70 | 778.85          | 1539.67        | 770.34           | 1538.68        | 769.85           | 14 |
| 12 | 1098.29 | 549.65          |                |                  | 1080.28        | 540.64           | I    | 1443.54 | 722.27          | 1426.51        | 713.76           | 1425.53        | 713.27           | 13 |
| 13 | 1185.37 | 593.19          |                |                  | 1167.35        | 584.18           | S    | 1330.38 | 665.70          | 1313.35        | 657.18           | 1312.37        | 656.69           | 12 |
| 14 | 1299.47 | 650.24          | 1282.44        | 641.73           | 1281.46        | 641.23           | N    | 1243.31 | 622.16          | 1226.28        | 613.64           | 1225.29        | 613.15           | 11 |
| 15 | 1427.60 | 714.30          | 1410.57        | 705.79           | 1409.59        | 705.30           | Q    | 1129.20 | 565.11          | 1112.17        | 556.59           | 1111.19        | 556.10           | 10 |
| 16 | 1555.73 | 778.37          | 1538.70        | 769.85           | 1537.72        | 769.36           | Q    | 1001.08 | 501.04          | 984.04         | 492.53           | 983.06         | 492.03           | 9  |
| 17 | 1668.89 | 834.95          | 1651.86        | 826.43           | 1650.87        | 825.94           | I    | 872.95  | 436.98          | 855.92         | 428.46           | 854.93         | 427.97           | 8  |
| 18 | 1769.99 | 885.50          | 1752.96        | 876.99           | 1751.98        | 876.49           | T    | 759.79  | 380.40          | 742.76         | 371.88           | 741.77         | 371.39           | 7  |
| 19 | 1841.07 | 921.04          | 1824.04        | 912.52           | 1823.06        | 912.03           | A    | 658.68  | 329.85          | 641.65         | 321.33           | 640.67         | 320.84           | 6  |
| 20 | 1928.15 | 964.58          | 1911.12        | 956.06           | 1910.13        | 955.57           | S    | 587.61  | 294.31          | 570.58         | 285.79           | 569.59         | 285.30           | 5  |
| 21 | 2015.23 | 1008.12         | 1998.19        | 999.60           | 1997.21        | 999.11           | S    | 500.53  | 250.77          | 483.50         | 242.25           | 482.51         | 241.76           | 4  |
| 22 | 2116.33 | 1058.67         | 2099.30        | 1050.15          | 2098.31        | 1049.66          | T    | 413.45  | 207.23          | 396.42         | 198.71           | 395.44         | 198.22           | 3  |
| 23 | 2253.47 | 1127.24         | 2236.44        | 1118.72          | 2235.45        | 1118.23          | H    | 312.35  | 156.68          | 295.32         | 148.16           |                |                  | 2  |
| 24 |         |                 |                |                  |                |                  | R    | 175.21  | 88.11           | 158.18         | 79.59            |                |                  | 1  |

Gene Symbol  
EEF1B2

Sequences  
SSILLDVKPWDDETDMAKLEE**C**V**R**

m/z  
932.10

Charge  
3+

Ion score  
73.4

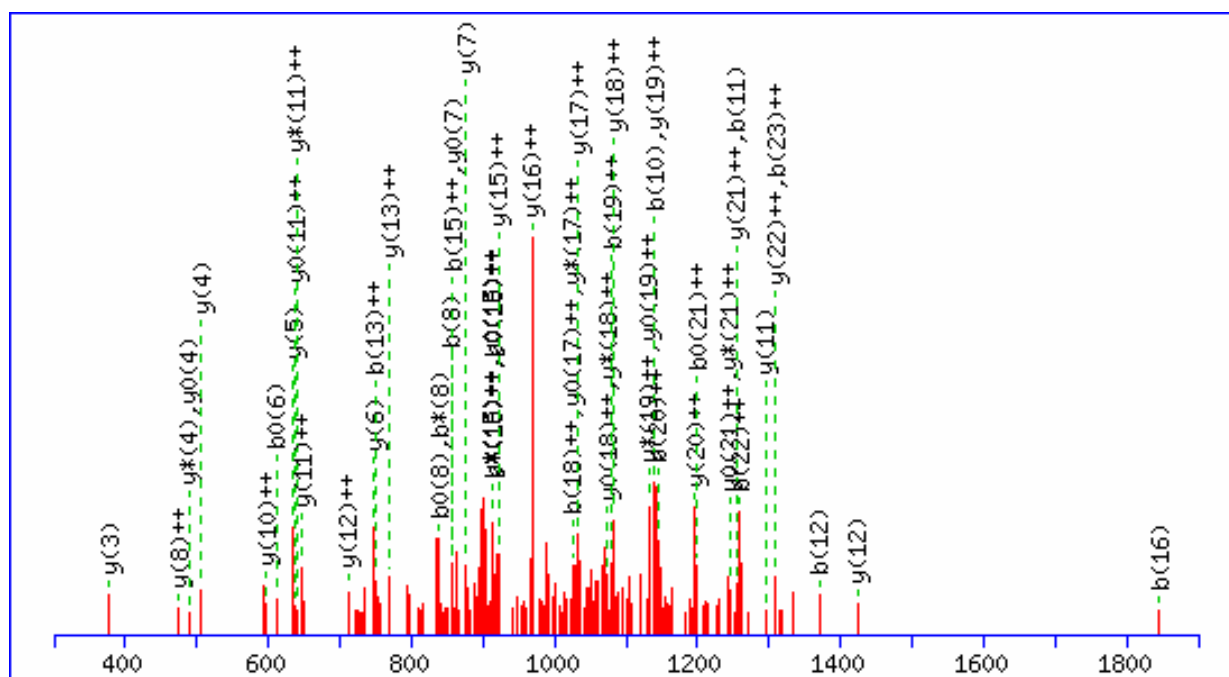

| #  | b              | b <sup>++</sup> | b <sup>+</sup> | b <sup>+++</sup> | b <sup>0</sup> | b <sup>0++</sup> | Seq. | y              | y <sup>++</sup> | y <sup>+</sup> | y <sup>+++</sup> | y <sup>0</sup> | y <sup>0++</sup> | #  |
|----|----------------|-----------------|----------------|------------------|----------------|------------------|------|----------------|-----------------|----------------|------------------|----------------|------------------|----|
| 1  | 88.09          | 44.55           |                |                  | 70.07          | 35.54            | S    |                |                 |                |                  |                |                  | 24 |
| 2  | 175.16         | 88.09           |                |                  | 157.15         | 79.08            | S    | 2707.06        | 1354.03         | 2690.03        | 1345.52          | 2689.05        | 1345.03          | 23 |
| 3  | 288.32         | 144.66          |                |                  | 270.30         | 135.66           | I    | 2619.98        | <b>1310.50</b>  | 2602.95        | 1301.98          | 2601.97        | 1301.49          | 22 |
| 4  | 401.48         | 201.24          |                |                  | 383.46         | 192.24           | L    | 2506.83        | <b>1253.92</b>  | 2489.80        | <b>1245.40</b>   | 2488.81        | <b>1244.91</b>   | 21 |
| 5  | 514.64         | 257.82          |                |                  | 496.62         | 248.81           | L    | 2393.67        | <b>1197.34</b>  | 2376.64        | 1188.82          | 2375.65        | 1188.33          | 20 |
| 6  | 629.72         | 315.37          |                |                  | <b>611.71</b>  | 306.36           | D    | 2280.51        | <b>1140.76</b>  | 2263.48        | <b>1132.24</b>   | 2262.50        | <b>1131.75</b>   | 19 |
| 7  | 728.85         | 364.93          |                |                  | 710.84         | 355.92           | V    | 2165.42        | <b>1083.22</b>  | 2148.39        | <b>1074.70</b>   | 2147.41        | <b>1074.21</b>   | 18 |
| 8  | <b>857.03</b>  | 429.02          | <b>840.00</b>  | 420.50           | <b>839.01</b>  | 420.01           | K    | 2066.29        | <b>1033.65</b>  | 2049.26        | <b>1025.13</b>   | 2048.28        | <b>1024.64</b>   | 17 |
| 9  | 954.14         | 477.57          | 937.11         | 469.06           | 936.13         | 468.57           | P    | 1938.12        | <b>969.56</b>   | 1921.09        | 961.05           | 1920.10        | 960.56           | 16 |
| 10 | <b>1140.35</b> | 570.68          | 1123.32        | 562.16           | 1122.34        | 561.67           | W    | 1841.00        | <b>921.01</b>   | 1823.97        | <b>912.49</b>    | 1822.99        | <b>912.00</b>    | 15 |
| 11 | <b>1255.44</b> | 628.22          | 1238.41        | 619.71           | 1237.42        | 619.22           | D    | 1654.79        | 827.90          | 1637.76        | 819.39           | 1636.78        | 818.89           | 14 |
| 12 | <b>1370.53</b> | 685.77          | 1353.50        | 677.25           | 1352.51        | 676.76           | D    | 1539.71        | <b>770.36</b>   | 1522.68        | 761.84           | 1521.69        | 761.35           | 13 |
| 13 | 1499.64        | <b>750.32</b>   | 1482.61        | 741.81           | 1481.62        | 741.32           | E    | <b>1424.62</b> | <b>712.81</b>   | 1407.59        | 704.30           | 1406.60        | 703.81           | 12 |
| 14 | 1600.74        | 800.88          | 1583.71        | 792.36           | 1582.73        | 791.87           | T    | <b>1295.51</b> | <b>648.26</b>   | 1278.48        | <b>639.74</b>    | 1277.49        | <b>639.25</b>    | 11 |
| 15 | 1715.83        | <b>858.42</b>   | 1698.80        | 849.90           | 1697.82        | 849.41           | D    | 1194.40        | <b>597.71</b>   | 1177.37        | 589.19           | 1176.39        | 588.70           | 10 |
| 16 | <b>1847.03</b> | 924.02          | 1830.00        | <b>915.50</b>    | 1829.01        | <b>915.01</b>    | M    | 1079.31        | 540.16          | 1062.28        | 531.65           | 1061.30        | 531.15           | 9  |
| 17 | 1918.11        | 959.56          | 1901.07        | 951.04           | 1900.09        | 950.55           | A    | 948.12         | <b>474.56</b>   | 931.09         | 466.05           | 930.10         | 465.56           | 8  |
| 18 | 2046.28        | <b>1023.64</b>  | 2029.25        | 1015.13          | 2028.26        | 1014.64          | K    | <b>877.04</b>  | 439.02          | 860.01         | 430.51           | <b>859.03</b>  | 430.02           | 7  |
| 19 | 2159.44        | <b>1080.22</b>  | 2142.40        | 1071.71          | 2141.42        | 1071.21          | L    | <b>748.87</b>  | 374.94          | 731.84         | 366.42           | 730.85         | 365.93           | 6  |
| 20 | 2288.55        | <b>1144.78</b>  | 2271.52        | 1136.26          | 2270.53        | 1135.77          | E    | <b>635.71</b>  | 318.36          | 618.68         | 309.84           | 617.70         | 309.35           | 5  |
| 21 | 2417.66        | 1209.34         | 2400.63        | 1200.82          | 2399.65        | <b>1200.33</b>   | E    | <b>506.60</b>  | 253.80          | <b>489.57</b>  | 245.29           | <b>488.58</b>  | 244.79           | 4  |
| 22 | 2520.81        | <b>1260.91</b>  | 2503.78        | 1252.39          | 2502.79        | 1251.90          | C    | <b>377.48</b>  | 189.25          | 360.45         | 180.73           |                |                  | 3  |
| 23 | 2619.94        | <b>1310.47</b>  | 2602.91        | 1301.96          | 2601.92        | 1301.46          | V    | 274.34         | 137.67          | 257.31         | 129.16           |                |                  | 2  |
| 24 |                |                 |                |                  |                |                  | R    | 175.21         | 88.11           | 158.18         | 79.59            |                |                  | 1  |

Gene Symbol  
EIF2S3

Sequences  
SCGSSTPDEFPTDIPGTK

m/z  
920.15

Charge  
2+

Ion score  
50.8

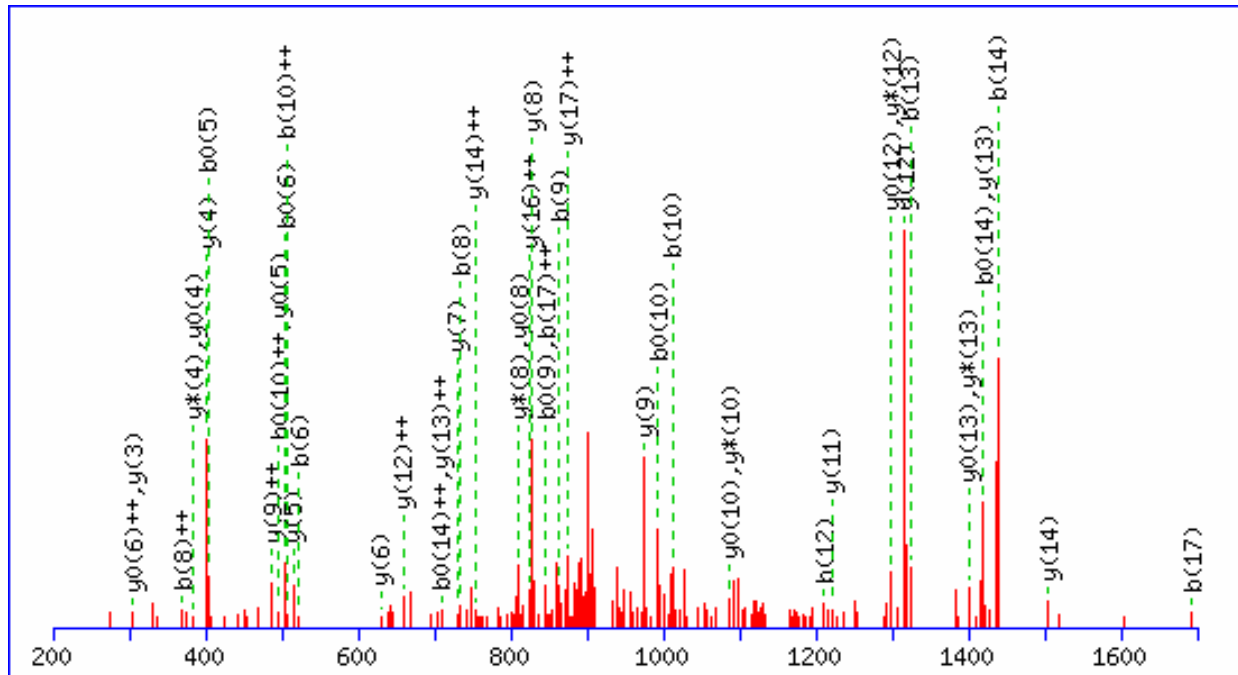

| #  | b              | b <sup>++</sup> | b <sup>0</sup> | b <sup>0++</sup> | Seq. | y              | y <sup>++</sup> | y <sup>+</sup> | y <sup>++</sup> | y <sup>0</sup> | y <sup>0++</sup> | #  |
|----|----------------|-----------------|----------------|------------------|------|----------------|-----------------|----------------|-----------------|----------------|------------------|----|
| 1  | 88.09          | 44.55           | 70.07          | 35.54            | S    |                |                 |                |                 |                |                  | 18 |
| 2  | 191.23         | 96.12           | 173.21         | 87.11            | C    | 1752.87        | <b>876.94</b>   | 1735.84        | 868.43          | 1734.86        | 867.93           | 17 |
| 3  | 248.28         | 124.64          | 230.26         | 115.64           | G    | 1649.73        | <b>825.37</b>   | 1632.70        | 816.85          | 1631.72        | 816.36           | 16 |
| 4  | 335.36         | 168.18          | 317.34         | 159.17           | S    | 1592.68        | 796.84          | 1575.65        | 788.33          | 1574.66        | 787.84           | 15 |
| 5  | 422.43         | 211.72          | <b>404.42</b>  | 202.71           | S    | <b>1505.60</b> | <b>753.30</b>   | 1488.57        | 744.79          | 1487.59        | 744.30           | 14 |
| 6  | <b>523.54</b>  | 262.27          | <b>505.52</b>  | 253.27           | T    | <b>1418.52</b> | <b>709.77</b>   | <b>1401.49</b> | 701.25          | <b>1400.51</b> | 700.76           | 13 |
| 7  | 620.65         | 310.83          | 602.64         | 301.82           | P    | <b>1317.42</b> | <b>659.21</b>   | <b>1300.39</b> | 650.70          | <b>1299.41</b> | 650.21           | 12 |
| 8  | <b>735.74</b>  | <b>368.37</b>   | 717.73         | 359.37           | D    | <b>1220.31</b> | 610.66          | 1203.27        | 602.14          | 1202.29        | 601.65           | 11 |
| 9  | <b>864.85</b>  | 432.93          | <b>846.84</b>  | 423.92           | E    | 1105.22        | 553.11          | <b>1088.19</b> | 544.60          | <b>1087.20</b> | 544.11           | 10 |
| 10 | <b>1012.03</b> | <b>506.52</b>   | <b>994.01</b>  | <b>497.51</b>    | F    | <b>976.10</b>  | <b>488.56</b>   | 959.07         | 480.04          | 958.09         | 479.55           | 9  |
| 11 | 1109.14        | 555.08          | 1091.13        | 546.07           | P    | <b>828.93</b>  | 414.97          | <b>811.90</b>  | 406.45          | <b>810.91</b>  | 405.96           | 8  |
| 12 | <b>1210.25</b> | 605.63          | 1192.23        | 596.62           | T    | <b>731.81</b>  | 366.41          | 714.78         | 357.90          | 713.80         | 357.40           | 7  |
| 13 | <b>1325.33</b> | 663.17          | 1307.32        | 654.16           | D    | <b>630.71</b>  | 315.86          | 613.68         | 307.34          | 612.70         | <b>306.85</b>    | 6  |
| 14 | <b>1438.49</b> | 719.75          | <b>1420.48</b> | <b>710.74</b>    | I    | <b>515.62</b>  | 258.32          | 498.59         | 249.80          | <b>497.61</b>  | 249.31           | 5  |
| 15 | 1535.61        | 768.31          | 1517.59        | 759.30           | P    | <b>402.47</b>  | 201.74          | <b>385.44</b>  | 193.22          | <b>384.45</b>  | 192.73           | 4  |
| 16 | 1592.66        | 796.83          | 1574.64        | 787.83           | G    | <b>305.35</b>  | 153.18          | 288.32         | 144.66          | 287.34         | 144.17           | 3  |
| 17 | <b>1693.76</b> | <b>847.39</b>   | 1675.75        | 838.38           | T    | 248.30         | 124.65          | 231.27         | 116.14          | 230.28         | 115.65           | 2  |
| 18 |                |                 |                |                  | K    | 147.20         | 74.10           | 130.16         | 65.59           |                |                  | 1  |

Gene Symbol  
FBXO45

Sequences  
MAAPAPGAGAASGGAGCSGGGAGAGAGSGGAAGAGGRLPSR

m/z 1081.69  
Charge 3+  
Ion score 44.7

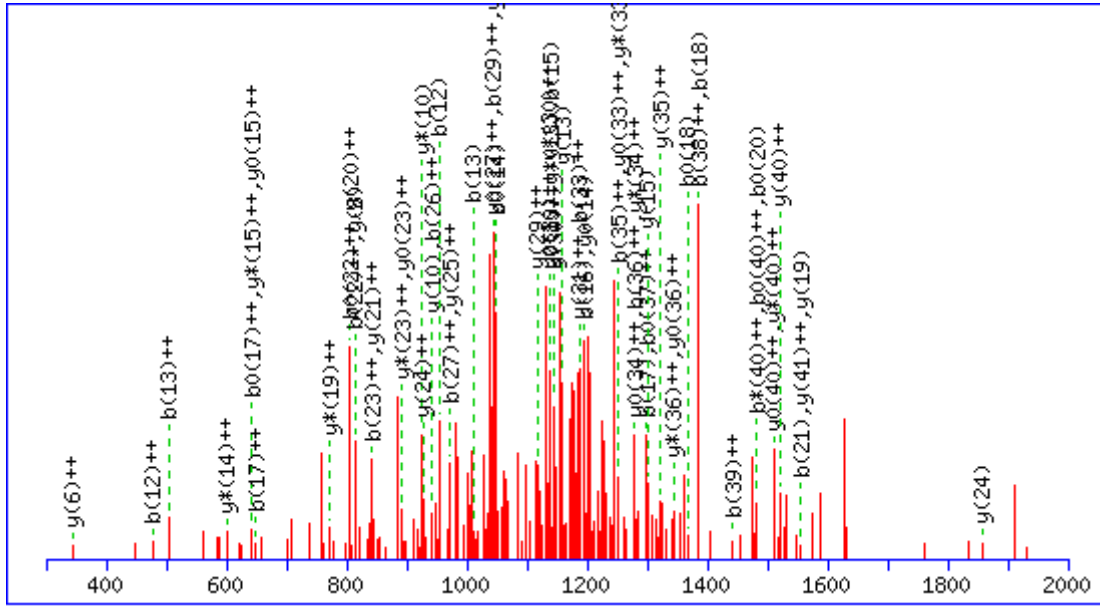

| #  | b       | b <sup>++</sup> | b <sup>+</sup> | b <sup>+++</sup> | b <sup>0</sup> | b <sup>0++</sup> | Seq. | y       | y <sup>++</sup> | y <sup>+</sup> | y <sup>+++</sup> | y <sup>0</sup> | y <sup>0++</sup> | #  |
|----|---------|-----------------|----------------|------------------|----------------|------------------|------|---------|-----------------|----------------|------------------|----------------|------------------|----|
| 1  | 132.20  | 66.61           |                |                  |                |                  | M    |         |                 |                |                  |                |                  | 42 |
| 2  | 203.28  | 102.14          |                |                  |                |                  | A    | 3111.26 | 1556.13         | 3094.23        | 1547.62          | 3093.25        | 1547.13          | 41 |
| 3  | 274.36  | 137.68          |                |                  |                |                  | A    | 3040.18 | 1520.60         | 3023.15        | 1512.08          | 3022.17        | 1511.59          | 40 |
| 4  | 371.48  | 186.24          |                |                  |                |                  | P    | 2969.10 | 1485.06         | 2952.07        | 1476.54          | 2951.09        | 1476.05          | 39 |
| 5  | 442.55  | 221.78          |                |                  |                |                  | A    | 2871.99 | 1436.50         | 2854.96        | 1427.98          | 2853.97        | 1427.49          | 38 |
| 6  | 539.67  | 270.34          |                |                  |                |                  | P    | 2800.91 | 1400.96         | 2783.88        | 1392.44          | 2782.90        | 1391.95          | 37 |
| 7  | 596.72  | 298.86          |                |                  |                |                  | G    | 2703.80 | 1352.40         | 2686.77        | 1343.89          | 2685.78        | 1343.39          | 36 |
| 8  | 667.80  | 334.40          |                |                  |                |                  | A    | 2646.75 | 1323.88         | 2629.71        | 1315.36          | 2628.73        | 1314.87          | 35 |
| 9  | 724.85  | 362.93          |                |                  |                |                  | G    | 2575.67 | 1288.34         | 2558.64        | 1279.82          | 2557.65        | 1279.33          | 34 |
| 10 | 795.93  | 398.47          |                |                  |                |                  | A    | 2518.62 | 1259.81         | 2501.59        | 1251.30          | 2500.60        | 1250.80          | 33 |
| 11 | 867.00  | 434.01          |                |                  |                |                  | A    | 2447.54 | 1224.27         | 2430.51        | 1215.76          | 2429.52        | 1215.27          | 32 |
| 12 | 954.08  | 477.54          |                |                  | 936.07         | 468.54           | S    | 2376.46 | 1188.73         | 2359.43        | 1180.22          | 2358.45        | 1179.73          | 31 |
| 13 | 1011.13 | 506.07          |                |                  | 993.12         | 497.06           | G    | 2289.38 | 1148.20         | 2272.35        | 1136.68          | 2271.37        | 1136.19          | 30 |
| 14 | 1068.18 | 534.60          |                |                  | 1050.17        | 525.59           | G    | 2232.33 | 1116.67         | 2215.30        | 1108.15          | 2214.32        | 1107.66          | 29 |
| 15 | 1139.26 | 570.14          |                |                  | 1121.25        | 561.13           | A    | 2175.28 | 1088.14         | 2158.25        | 1079.63          | 2157.27        | 1079.14          | 28 |
| 16 | 1196.31 | 598.66          |                |                  | 1178.30        | 589.65           | G    | 2104.20 | 1052.61         | 2087.17        | 1044.09          | 2086.19        | 1043.60          | 27 |
| 17 | 1299.46 | 650.23          |                |                  | 1281.44        | 641.22           | C    | 2047.15 | 1024.08         | 2030.12        | 1015.56          | 2029.14        | 1015.07          | 26 |
| 18 | 1386.53 | 693.77          |                |                  | 1368.52        | 684.76           | S    | 1944.01 | 972.51          | 1926.98        | 963.99           | 1925.99        | 963.50           | 25 |
| 19 | 1443.59 | 722.30          |                |                  | 1425.57        | 713.29           | G    | 1856.93 | 928.97          | 1839.90        | 920.45           | 1838.92        | 919.96           | 24 |
| 20 | 1500.64 | 750.82          |                |                  | 1482.62        | 741.81           | G    | 1799.88 | 900.44          | 1782.85        | 891.93           | 1781.86        | 891.44           | 23 |
| 21 | 1557.69 | 779.35          |                |                  | 1539.67        | 770.34           | G    | 1742.83 | 871.92          | 1725.80        | 863.40           | 1724.81        | 862.91           | 22 |
| 22 | 1628.77 | 814.89          |                |                  | 1610.75        | 805.88           | A    | 1685.78 | 843.39          | 1668.75        | 834.88           | 1667.76        | 834.38           | 21 |
| 23 | 1685.82 | 843.41          |                |                  | 1667.80        | 834.40           | G    | 1614.70 | 807.85          | 1597.67        | 799.34           | 1596.68        | 798.85           | 20 |
| 24 | 1756.89 | 878.95          |                |                  | 1738.88        | 869.94           | A    | 1557.65 | 779.33          | 1540.62        | 770.81           | 1539.63        | 770.32           | 19 |
| 25 | 1813.95 | 907.48          |                |                  | 1795.93        | 898.47           | G    | 1486.57 | 743.79          | 1469.54        | 735.27           | 1468.55        | 734.78           | 18 |
| 26 | 1885.02 | 943.02          |                |                  | 1867.01        | 934.01           | A    | 1429.52 | 715.26          | 1412.49        | 706.75           | 1411.50        | 706.26           | 17 |
| 27 | 1942.08 | 971.54          |                |                  | 1924.06        | 962.53           | G    | 1358.44 | 679.72          | 1341.41        | 671.21           | 1340.43        | 670.72           | 16 |
| 28 | 2029.15 | 1015.08         |                |                  | 2011.14        | 1006.07          | S    | 1301.39 | 651.20          | 1284.36        | 642.68           | 1283.37        | 642.19           | 15 |
| 29 | 2086.20 | 1043.61         |                |                  | 2068.19        | 1034.60          | G    | 1214.31 | 607.66          | 1197.28        | 599.14           | 1196.30        | 598.65           | 14 |
| 30 | 2173.28 | 1087.14         |                |                  | 2155.27        | 1078.14          | S    | 1157.26 | 579.13          | 1140.23        | 570.62           | 1139.25        | 570.13           | 13 |
| 31 | 2230.33 | 1115.67         |                |                  | 2212.32        | 1106.66          | G    | 1070.18 | 535.60          | 1053.15        | 527.08           | 1052.17        | 526.59           | 12 |
| 32 | 2301.41 | 1151.21         |                |                  | 2283.40        | 1142.20          | A    | 1013.13 | 507.07          | 996.10         | 498.55           | 995.12         | 498.06           | 11 |
| 33 | 2372.49 | 1186.75         |                |                  | 2354.47        | 1177.74          | A    | 942.05  | 471.53          | 925.02         | 463.02           | 924.04         | 462.52           | 10 |
| 34 | 2429.54 | 1215.27         |                |                  | 2411.52        | 1206.27          | G    | 870.98  | 435.99          | 853.95         | 427.48           | 852.96         | 426.98           | 9  |
| 35 | 2500.62 | 1250.81         |                |                  | 2482.60        | 1241.81          | A    | 813.93  | 407.47          | 796.89         | 398.95           | 795.91         | 398.46           | 8  |
| 36 | 2557.67 | 1279.34         |                |                  | 2539.65        | 1270.33          | G    | 742.85  | 371.93          | 725.82         | 363.41           | 724.83         | 362.92           | 7  |
| 37 | 2614.72 | 1307.86         |                |                  | 2596.70        | 1298.86          | G    | 685.80  | 343.40          | 668.77         | 334.89           | 667.78         | 334.39           | 6  |
| 38 | 2770.91 | 1385.96         | 2753.88        | 1377.44          | 2752.89        | 1376.95          | R    | 628.74  | 314.88          | 611.71         | 306.36           | 610.73         | 305.87           | 5  |
| 39 | 2884.06 | 1442.54         | 2867.03        | 1434.02          | 2866.05        | 1433.53          | L    | 472.56  | 236.78          | 455.53         | 228.27           | 454.54         | 227.78           | 4  |
| 40 | 2981.18 | 1491.09         | 2964.15        | 1482.58          | 2963.16        | 1482.09          | P    | 359.40  | 180.20          | 342.37         | 171.69           | 341.39         | 171.20           | 3  |
| 41 | 3068.26 | 1534.63         | 3051.23        | 1526.12          | 3050.24        | 1525.62          | S    | 262.29  | 131.65          | 245.26         | 123.13           | 244.27         | 122.64           | 2  |
| 42 |         |                 |                |                  |                |                  | R    | 175.21  | 88.11           | 158.18         | 79.59            |                |                  | 1  |

Gene Symbol  
FER1L3

Sequences  
LDLPNRPETSFLWFTN**PCK**

m/z  
760.70

Charge  
3+

Ion score  
87.5

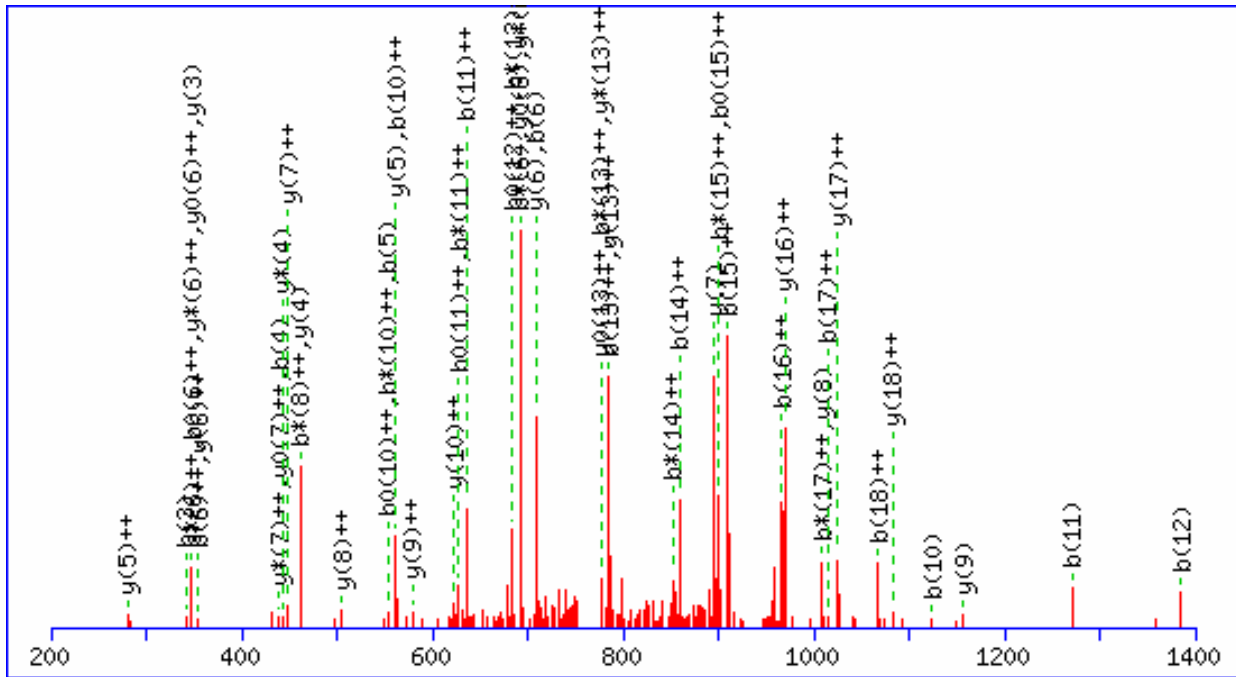

| #  | b              | b <sup>++</sup> | b <sup>+</sup> | b <sup>+++</sup> | b <sup>0</sup> | b <sup>0++</sup> | Seq. | y              | y <sup>++</sup> | y <sup>+</sup> | y <sup>+++</sup> | y <sup>0</sup> | y <sup>0++</sup> | #  |
|----|----------------|-----------------|----------------|------------------|----------------|------------------|------|----------------|-----------------|----------------|------------------|----------------|------------------|----|
| 1  | 114.17         | 57.59           |                |                  |                |                  | L    |                |                 |                |                  |                |                  | 19 |
| 2  | 229.25         | 115.13          |                |                  | 211.24         | 106.12           | D    | 2166.43        | <b>1083.72</b>  | 2149.40        | 1075.21          | 2148.42        | 1074.71          | 18 |
| 3  | <b>342.41</b>  | 171.71          |                |                  | 324.40         | 162.70           | L    | 2051.35        | <b>1026.18</b>  | 2034.32        | 1017.66          | 2033.33        | 1017.17          | 17 |
| 4  | <b>439.53</b>  | 220.27          |                |                  | 421.51         | 211.26           | P    | 1938.19        | <b>969.60</b>   | 1921.16        | 961.08           | 1920.17        | 960.59           | 16 |
| 5  | <b>553.63</b>  | 277.32          | 536.60         | 268.80           | 535.61         | 268.31           | N    | 1841.07        | 921.04          | 1824.04        | 912.53           | 1823.06        | 912.03           | 15 |
| 6  | <b>709.81</b>  | <b>355.41</b>   | <b>692.78</b>  | <b>346.90</b>    | <b>691.80</b>  | <b>346.40</b>    | R    | 1726.97        | 863.99          | 1709.94        | 855.47           | 1708.96        | 854.98           | 14 |
| 7  | 806.93         | 403.97          | 789.90         | 395.45           | 788.91         | 394.96           | P    | 1570.79        | <b>785.90</b>   | 1553.76        | <b>777.38</b>    | 1552.77        | <b>776.89</b>    | 13 |
| 8  | 936.04         | 468.53          | 919.01         | <b>460.01</b>    | 918.03         | 459.52           | E    | 1473.67        | 737.34          | 1456.64        | 728.82           | 1455.66        | 728.33           | 12 |
| 9  | 1037.15        | 519.08          | 1020.12        | 510.56           | 1019.13        | 510.07           | T    | 1344.56        | 672.78          | 1327.53        | 664.27           | 1326.54        | 663.77           | 11 |
| 10 | <b>1124.22</b> | <b>562.62</b>   | 1107.19        | <b>554.10</b>    | 1106.21        | <b>553.61</b>    | S    | 1243.45        | <b>622.23</b>   | 1226.42        | 613.72           | 1225.44        | 613.22           | 10 |
| 11 | <b>1271.40</b> | <b>636.20</b>   | 1254.37        | <b>627.69</b>    | 1253.38        | <b>627.20</b>    | F    | <b>1156.38</b> | <b>578.69</b>   | 1139.34        | 570.18           | 1138.36        | 569.68           | 9  |
| 12 | <b>1384.56</b> | <b>692.78</b>   | 1367.53        | <b>684.27</b>    | 1366.54        | <b>683.77</b>    | L    | <b>1009.20</b> | <b>505.10</b>   | 992.17         | 496.59           | 991.19         | 496.10           | 8  |
| 13 | 1570.77        | <b>785.89</b>   | 1553.74        | <b>777.37</b>    | 1552.75        | <b>776.88</b>    | W    | <b>896.04</b>  | <b>448.53</b>   | 879.01         | <b>440.01</b>    | 878.03         | <b>439.52</b>    | 7  |
| 14 | 1717.94        | <b>859.47</b>   | 1700.91        | <b>850.96</b>    | 1699.92        | 850.47           | F    | <b>709.83</b>  | <b>355.42</b>   | <b>692.80</b>  | <b>346.91</b>    | <b>691.82</b>  | <b>346.41</b>    | 6  |
| 15 | 1819.04        | <b>910.03</b>   | 1802.01        | <b>901.51</b>    | 1801.03        | <b>901.02</b>    | T    | <b>562.66</b>  | <b>281.83</b>   | 545.63         | 273.32           | 544.64         | 272.83           | 5  |
| 16 | 1933.15        | <b>967.08</b>   | 1916.12        | 958.56           | 1915.13        | 958.07           | N    | <b>461.56</b>  | 231.28          | <b>444.53</b>  | 222.77           |                |                  | 4  |
| 17 | 2030.26        | <b>1015.63</b>  | 2013.23        | <b>1007.12</b>   | 2012.25        | 1006.63          | P    | <b>347.45</b>  | 174.23          | 330.42         | 165.72           |                |                  | 3  |
| 18 | 2133.40        | <b>1067.21</b>  | 2116.37        | 1058.69          | 2115.39        | 1058.20          | C    | 250.34         | 125.67          | 233.31         | 117.16           |                |                  | 2  |
| 19 |                |                 |                |                  |                |                  | K    | 147.20         | 74.10           | 130.17         | 65.59            |                |                  | 1  |

Gene Symbol  
FLNA

Sequences  
CSGPGLSPGMVR

m/z  
580.56

Charge  
2+

Ion score  
61.4

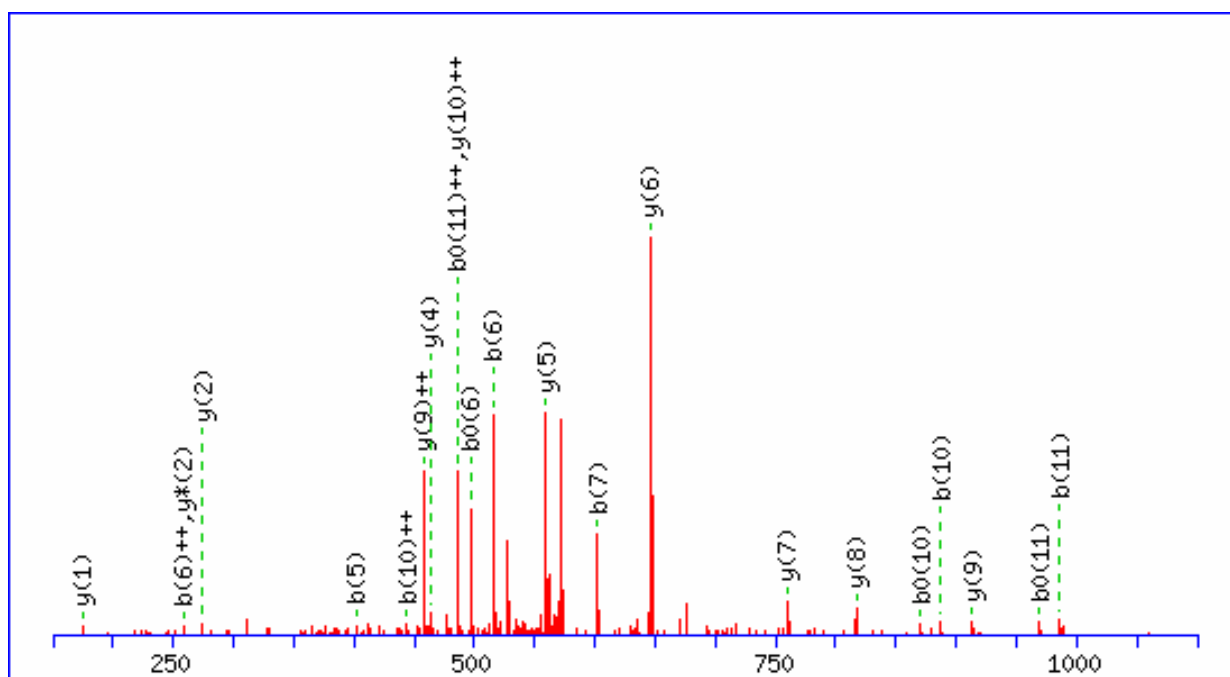

| #  | b             | b <sup>++</sup> | b <sup>0</sup> | b <sup>0++</sup> | Seq. | y             | y <sup>++</sup> | y <sup>*</sup> | y <sup>*++</sup> | y <sup>0</sup> | y <sup>0++</sup> | #  |
|----|---------------|-----------------|----------------|------------------|------|---------------|-----------------|----------------|------------------|----------------|------------------|----|
| 1  | 104.15        | 52.58           |                |                  | C    |               |                 |                |                  |                |                  | 12 |
| 2  | 191.23        | 96.12           | 173.21         | 87.11            | S    | 1058.23       | 529.62          | 1041.20        | 521.11           | 1040.22        | 520.61           | 11 |
| 3  | 248.28        | 124.64          | 230.26         | 115.64           | G    | 971.16        | <b>486.08</b>   | 954.12         | 477.57           | 953.14         | 477.07           | 10 |
| 4  | 345.39        | 173.20          | 327.38         | 164.19           | P    | <b>914.10</b> | <b>457.56</b>   | 897.07         | 449.04           | 896.09         | 448.55           | 9  |
| 5  | <b>402.45</b> | 201.73          | 384.43         | 192.72           | G    | <b>816.99</b> | 409.00          | 799.96         | 400.48           | 798.97         | 399.99           | 8  |
| 6  | <b>515.60</b> | <b>258.31</b>   | <b>497.59</b>  | 249.30           | L    | <b>759.94</b> | 380.47          | 742.91         | 371.96           | 741.92         | 371.47           | 7  |
| 7  | <b>602.68</b> | 301.84          | 584.67         | 292.84           | S    | <b>646.78</b> | 323.89          | 629.75         | 315.38           | 628.76         | 314.89           | 6  |
| 8  | 699.80        | 350.40          | 681.78         | 341.39           | P    | <b>559.70</b> | 280.36          | 542.67         | 271.84           |                |                  | 5  |
| 9  | 756.85        | 378.93          | 738.83         | 369.92           | G    | <b>462.59</b> | 231.80          | 445.56         | 223.28           |                |                  | 4  |
| 10 | <b>888.04</b> | <b>444.53</b>   | <b>870.03</b>  | 435.52           | M    | 405.54        | 203.27          | 388.51         | 194.76           |                |                  | 3  |
| 11 | <b>987.17</b> | 494.09          | <b>969.16</b>  | <b>485.08</b>    | V    | <b>274.34</b> | 137.67          | <b>257.31</b>  | 129.16           |                |                  | 2  |
| 12 |               |                 |                |                  | R    | <b>175.21</b> | 88.11           | 158.18         | 79.59            |                |                  | 1  |

Gene Symbol  
FLNA

Sequences  
SPYTVTVGQACNPSACR

m/z  
877.67

Charge  
2+

Ion score  
100.4

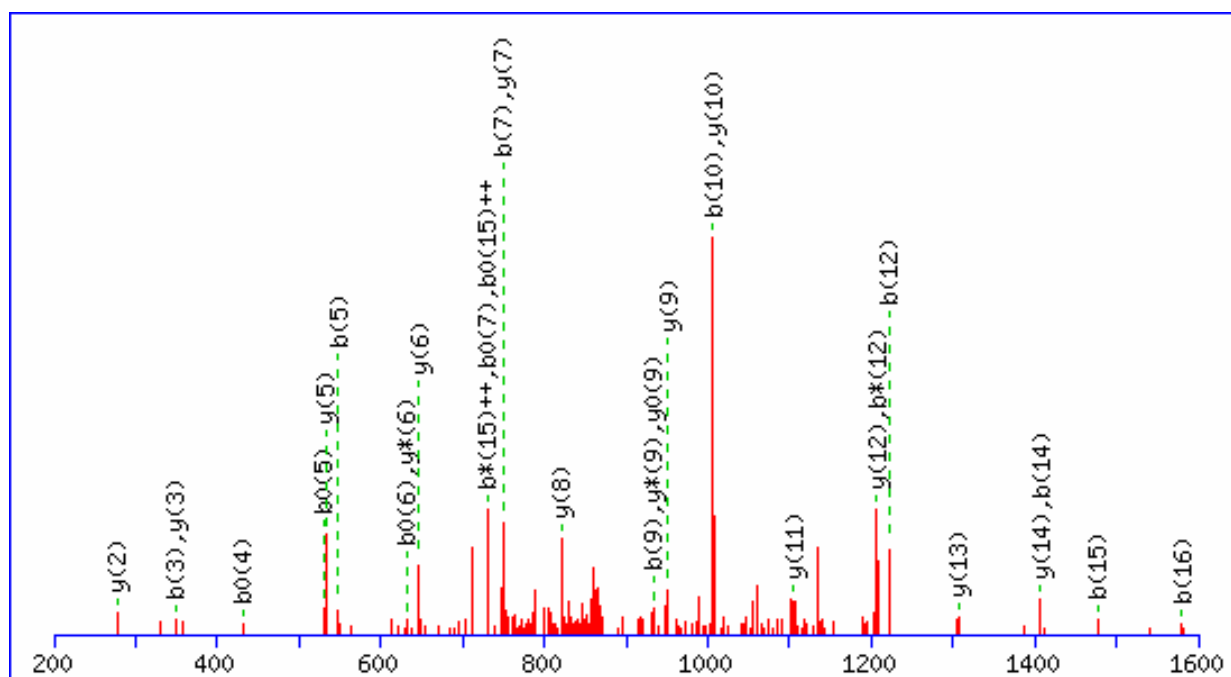

| #  | b       | b <sup>++</sup> | b <sup>*</sup> | b <sup>*++</sup> | b <sup>0</sup> | b <sup>0++</sup> | Seq. | y       | y <sup>++</sup> | y <sup>*</sup> | y <sup>*++</sup> | y <sup>0</sup> | y <sup>0++</sup> | #  |
|----|---------|-----------------|----------------|------------------|----------------|------------------|------|---------|-----------------|----------------|------------------|----------------|------------------|----|
| 1  | 88.09   | 44.55           |                |                  | 70.07          | 35.54            | S    |         |                 |                |                  |                |                  | 17 |
| 2  | 185.20  | 93.10           |                |                  | 167.19         | 84.10            | P    | 1667.88 | 834.45          | 1650.85        | 825.93           | 1649.87        | 825.44           | 16 |
| 3  | 348.37  | 174.69          |                |                  | 330.36         | 165.68           | Y    | 1570.77 | 785.89          | 1553.74        | 777.37           | 1552.75        | 776.88           | 15 |
| 4  | 449.48  | 225.24          |                |                  | 431.46         | 216.24           | T    | 1407.60 | 704.30          | 1390.57        | 695.79           | 1389.58        | 695.29           | 14 |
| 5  | 548.61  | 274.81          |                |                  | 530.59         | 265.80           | V    | 1306.49 | 653.75          | 1289.46        | 645.23           | 1288.48        | 644.74           | 13 |
| 6  | 649.71  | 325.36          |                |                  | 631.70         | 316.35           | T    | 1207.36 | 604.18          | 1190.33        | 595.67           | 1189.35        | 595.18           | 12 |
| 7  | 748.84  | 374.93          |                |                  | 730.83         | 365.92           | V    | 1106.26 | 553.63          | 1089.23        | 545.12           | 1088.24        | 544.62           | 11 |
| 8  | 805.90  | 403.45          |                |                  | 787.88         | 394.44           | G    | 1007.13 | 504.07          | 990.10         | 495.55           | 989.11         | 495.06           | 10 |
| 9  | 934.02  | 467.52          | 916.99         | 459.00           | 916.01         | 458.51           | Q    | 950.07  | 475.54          | 933.04         | 467.03           | 932.06         | 466.53           | 9  |
| 10 | 1005.10 | 503.06          | 988.07         | 494.54           | 987.09         | 494.05           | A    | 821.95  | 411.48          | 804.92         | 402.96           | 803.93         | 402.47           | 8  |
| 11 | 1108.25 | 554.63          | 1091.21        | 546.11           | 1090.23        | 545.62           | C    | 750.87  | 375.94          | 733.84         | 367.42           | 732.85         | 366.93           | 7  |
| 12 | 1222.35 | 611.68          | 1205.32        | 603.16           | 1204.33        | 602.67           | N    | 647.72  | 324.37          | 630.69         | 315.85           | 629.71         | 315.36           | 6  |
| 13 | 1319.46 | 660.24          | 1302.43        | 651.72           | 1301.45        | 651.23           | P    | 533.62  | 267.32          | 516.59         | 258.80           | 515.61         | 258.31           | 5  |
| 14 | 1406.54 | 703.77          | 1389.51        | 695.26           | 1388.52        | 694.77           | S    | 436.51  | 218.76          | 419.48         | 210.24           | 418.49         | 209.75           | 4  |
| 15 | 1477.62 | 739.31          | 1460.59        | 730.80           | 1459.60        | 730.31           | A    | 349.43  | 175.22          | 332.40         | 166.70           |                |                  | 3  |
| 16 | 1580.76 | 790.88          | 1563.73        | 782.37           | 1562.75        | 781.88           | C    | 278.35  | 139.68          | 261.32         | 131.16           |                |                  | 2  |
| 17 |         |                 |                |                  |                |                  | R    | 175.21  | 88.11           | 158.18         | 79.59            |                |                  | 1  |



Gene Symbol Sequences m/z Charge Ion score  
 FLNA VGSAADIPINISETDLSLLTATVVPPSGREEPCLLK 1236.40 3+ 102.1

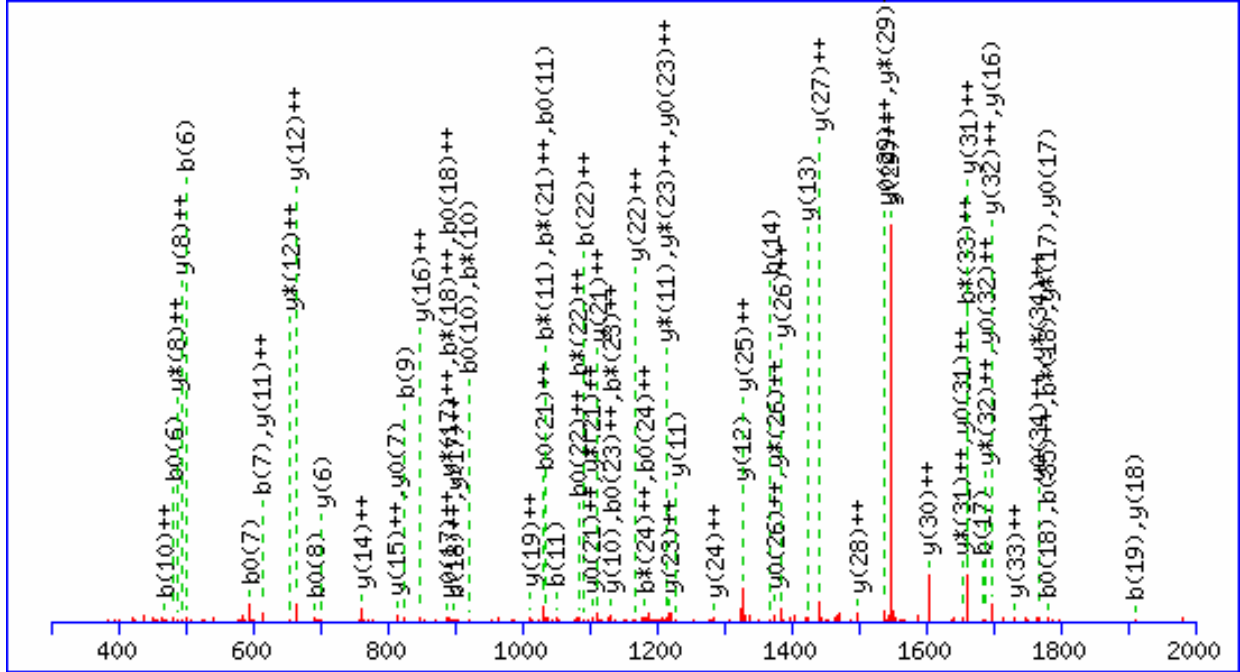

| #  | b              | b <sup>+</sup> | b <sup>+</sup> | b <sup>++</sup> | b <sup>0</sup> | b <sup>0+</sup> | Seq. | y              | y <sup>+</sup> | y <sup>+</sup> | y <sup>++</sup> | y <sup>0</sup> | y <sup>0+</sup> | #  |
|----|----------------|----------------|----------------|-----------------|----------------|-----------------|------|----------------|----------------|----------------|-----------------|----------------|-----------------|----|
| 1  | 100.14         | 50.57          |                |                 |                |                 | V    |                |                |                |                 |                |                 | 36 |
| 2  | 157.19         | 79.10          |                |                 |                |                 | G    | 3609.08        | 1805.05        | 3592.05        | 1796.53         | 3591.07        | 1796.04         | 35 |
| 3  | 244.27         | 122.64         |                |                 | 226.25         | 113.63          | S    | 3552.03        | 1776.52        | 3535.00        | <b>1768.01</b>  | 3534.02        | <b>1767.51</b>  | 34 |
| 4  | 315.35         | 158.18         |                |                 | 297.33         | 149.17          | A    | 3464.96        | <b>1732.98</b> | 3447.93        | 1724.47         | 3446.94        | 1723.97         | 33 |
| 5  | 386.42         | 193.72         |                |                 | 368.41         | 184.71          | A    | 3393.88        | <b>1697.44</b> | 3376.85        | <b>1688.93</b>  | 3375.86        | <b>1688.44</b>  | 32 |
| 6  | <b>501.51</b>  | 251.26         |                |                 | <b>483.50</b>  | 242.25          | D    | 3322.80        | <b>1661.90</b> | 3305.77        | <b>1653.39</b>  | 3304.78        | <b>1652.90</b>  | 31 |
| 7  | <b>614.67</b>  | 307.84         |                |                 | <b>596.65</b>  | 298.83          | I    | 3207.71        | <b>1604.36</b> | 3190.68        | 1595.85         | 3189.70        | 1595.35         | 30 |
| 8  | 711.78         | 356.40         |                |                 | <b>693.77</b>  | 347.39          | P    | 3094.56        | <b>1547.78</b> | 3077.52        | <b>1539.27</b>  | 3076.54        | <b>1538.77</b>  | 29 |
| 9  | <b>824.94</b>  | 412.97         |                |                 | 806.93         | 403.97          | I    | 2997.44        | <b>1499.22</b> | 2980.41        | 1490.71         | 2979.42        | 1490.22         | 28 |
| 10 | 939.04         | <b>470.03</b>  | <b>922.01</b>  | 461.51          | <b>921.03</b>  | 461.02          | N    | 2884.28        | <b>1442.65</b> | 2867.25        | 1434.13         | 2866.27        | 1433.64         | 27 |
| 11 | <b>1052.20</b> | 526.60         | <b>1035.17</b> | 518.09          | <b>1034.19</b> | 517.60          | I    | 2770.18        | <b>1385.59</b> | 2753.15        | <b>1377.08</b>  | 2752.16        | <b>1376.59</b>  | 26 |
| 12 | 1139.28        | 570.14         | 1122.25        | 561.63          | 1121.26        | 561.14          | S    | 2657.02        | <b>1329.02</b> | 2639.99        | 1320.50         | 2639.01        | 1320.01         | 25 |
| 13 | 1268.39        | 634.70         | 1251.36        | 626.19          | 1250.38        | 625.69          | E    | 2569.94        | <b>1285.48</b> | 2552.91        | 1276.96         | 2551.93        | 1276.47         | 24 |
| 14 | <b>1369.50</b> | 685.25         | 1352.47        | 676.74          | 1351.48        | 676.24          | T    | 2440.83        | <b>1220.92</b> | 2423.80        | <b>1212.40</b>  | 2422.82        | <b>1211.91</b>  | 23 |
| 15 | 1484.58        | 742.80         | 1467.55        | 734.28          | 1466.57        | 733.79          | D    | 2339.73        | <b>1170.37</b> | 2322.70        | 1161.85         | 2321.71        | 1161.36         | 22 |
| 16 | 1597.74        | 799.37         | 1580.71        | 790.86          | 1579.73        | 790.37          | L    | 2224.64        | <b>1112.82</b> | 2207.61        | <b>1104.31</b>  | 2206.62        | <b>1103.82</b>  | 21 |
| 17 | <b>1684.82</b> | 842.91         | 1667.79        | 834.40          | 1666.80        | 833.91          | S    | 2111.48        | 1056.24        | 2094.45        | 1047.73         | 2093.47        | 1047.24         | 20 |
| 18 | 1797.98        | <b>899.49</b>  | <b>1780.95</b> | <b>890.98</b>   | <b>1779.96</b> | <b>890.48</b>   | L    | 2024.40        | <b>1012.71</b> | 2007.37        | 1004.19         | 2006.39        | 1003.70         | 19 |
| 19 | <b>1911.13</b> | 956.07         | 1894.10        | 947.56          | 1893.12        | 947.06          | L    | <b>1911.25</b> | 956.13         | 1894.22        | 947.61          | 1893.23        | 947.12          | 18 |
| 20 | 2012.24        | 1006.62        | 1995.21        | 998.11          | 1994.22        | 997.62          | T    | 1798.09        | <b>899.55</b>  | <b>1781.06</b> | <b>891.03</b>   | <b>1780.07</b> | <b>890.54</b>   | 17 |
| 21 | 2083.32        | 1042.16        | 2066.29        | <b>1033.65</b>  | 2065.30        | <b>1033.15</b>  | A    | <b>1696.99</b> | <b>849.00</b>  | 1679.96        | 840.48          | 1678.97        | 839.99          | 16 |
| 22 | 2184.42        | <b>1092.71</b> | 2167.39        | <b>1084.20</b>  | 2166.40        | <b>1083.71</b>  | T    | 1625.91        | <b>813.46</b>  | 1608.88        | 804.94          | 1607.89        | 804.45          | 15 |
| 23 | 2283.55        | 1142.28        | 2266.52        | <b>1133.76</b>  | 2265.54        | <b>1133.27</b>  | V    | 1524.80        | <b>762.91</b>  | 1507.77        | 754.39          | 1506.79        | 753.90          | 14 |
| 24 | 2382.68        | 1191.84        | 2365.65        | <b>1183.33</b>  | 2364.67        | <b>1182.84</b>  | V    | <b>1425.67</b> | 713.34         | 1408.64        | 704.83          | 1407.66        | 704.33          | 13 |
| 25 | 2479.80        | 1240.40        | 2462.77        | 1231.89         | 2461.78        | 1231.39         | P    | <b>1326.54</b> | <b>663.77</b>  | 1309.51        | <b>655.26</b>   | 1308.53        | 654.77          | 12 |
| 26 | 2576.91        | 1288.96        | 2559.88        | 1280.44         | 2558.90        | 1279.95         | P    | <b>1229.43</b> | <b>615.22</b>  | <b>1212.40</b> | 606.70          | 1211.41        | 606.21          | 11 |
| 27 | 2663.99        | 1332.50        | 2646.96        | 1323.98         | 2645.97        | 1323.49         | S    | <b>1132.31</b> | 566.66         | 1115.28        | 558.14          | 1114.30        | 557.65          | 10 |
| 28 | 2721.04        | 1361.02        | 2704.01        | 1352.51         | 2703.03        | 1352.02         | G    | 1045.23        | 523.12         | 1028.20        | 514.61          | 1027.22        | 514.11          | 9  |
| 29 | 2877.23        | 1439.12        | 2860.20        | 1430.60         | 2859.21        | 1430.11         | R    | 988.18         | <b>494.60</b>  | 971.15         | <b>486.08</b>   | 970.17         | 485.59          | 8  |
| 30 | 3006.34        | 1503.67        | 2989.31        | 1495.16         | 2988.33        | 1494.67         | E    | 832.00         | 416.50         | 814.97         | 407.99          | <b>813.98</b>  | 407.49          | 7  |
| 31 | 3135.45        | 1568.23        | 3118.42        | 1559.72         | 3117.44        | 1559.22         | E    | <b>702.88</b>  | 351.95         | 685.85         | 343.43          | 684.87         | 342.94          | 6  |
| 32 | 3232.57        | 1616.79        | 3215.54        | 1608.27         | 3214.55        | 1607.78         | P    | 573.77         | 287.39         | 556.74         | 278.87          |                |                 | 5  |
| 33 | 3335.71        | 1668.36        | 3318.68        | <b>1659.85</b>  | 3317.70        | 1659.35         | C    | 476.65         | 238.83         | 459.62         | 230.32          |                |                 | 4  |
| 34 | 3448.87        | 1724.94        | 3431.84        | 1716.42         | 3430.86        | 1715.93         | L    | 373.51         | 187.26         | 356.48         | 178.74          |                |                 | 3  |
| 35 | 3562.03        | <b>1781.52</b> | 3545.00        | 1773.00         | 3544.01        | 1772.51         | L    | 260.35         | 130.68         | 243.32         | 122.17          |                |                 | 2  |
| 36 |                |                |                |                 |                |                 | K    | 147.20         | 74.10          | 130.17         | 65.59           |                |                 | 1  |

Gene Symbol: FLNA  
Sequences: VHSPSGALEECYVTEIDQDKYAVR  
m/z: 678.60  
Charge: 4+  
Ion score: 115.6

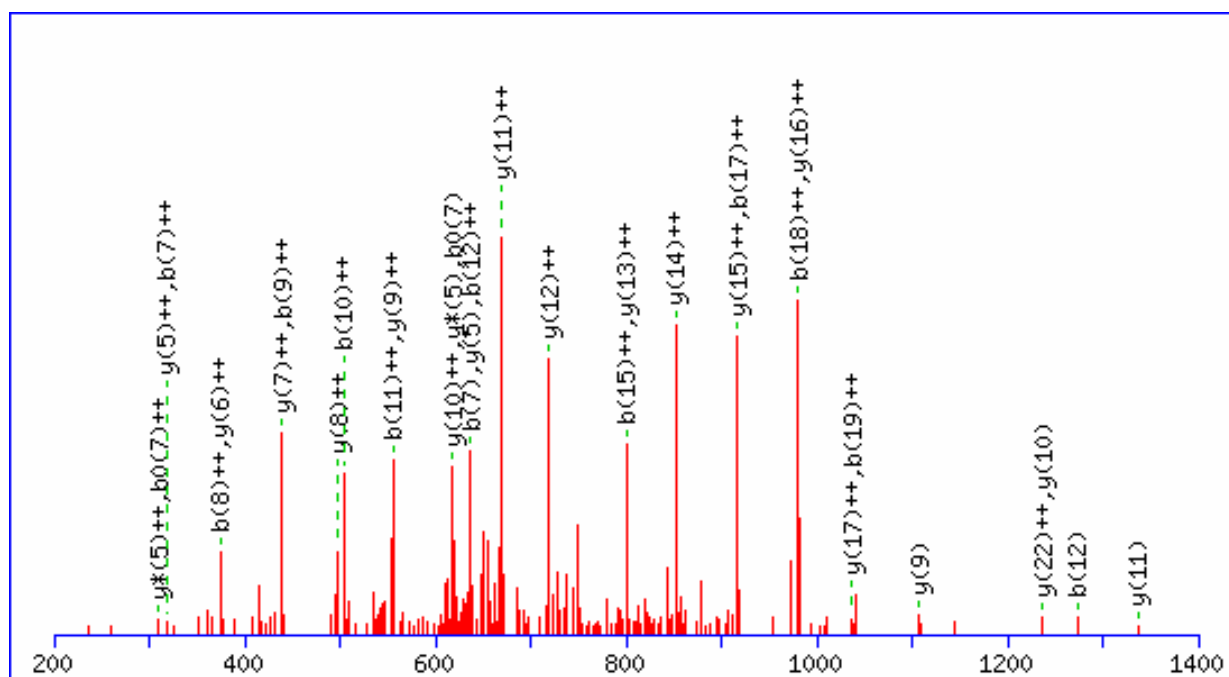

| #  | b       | b <sup>++</sup> | b <sup>*</sup> | b <sup>+++</sup> | b <sup>0</sup> | b <sup>0++</sup> | Seq. | y       | y <sup>++</sup> | y <sup>*</sup> | y <sup>+++</sup> | y <sup>0</sup> | y <sup>0++</sup> | #  |
|----|---------|-----------------|----------------|------------------|----------------|------------------|------|---------|-----------------|----------------|------------------|----------------|------------------|----|
| 1  | 100.14  | 50.57           |                |                  |                |                  | V    |         |                 |                |                  |                |                  | 24 |
| 2  | 237.28  | 119.14          |                |                  |                |                  | H    | 2611.81 | 1306.41         | 2594.78        | 1297.90          | 2593.80        | 1297.40          | 23 |
| 3  | 324.36  | 162.68          |                |                  | 306.34         | 153.67           | S    | 2474.67 | 1237.84         | 2457.64        | 1229.33          | 2456.66        | 1228.83          | 22 |
| 4  | 421.47  | 211.24          |                |                  | 403.46         | 202.23           | P    | 2387.60 | 1194.30         | 2370.57        | 1185.79          | 2369.58        | 1185.30          | 21 |
| 5  | 508.55  | 254.78          |                |                  | 490.53         | 245.77           | S    | 2290.48 | 1145.75         | 2273.45        | 1137.23          | 2272.47        | 1136.74          | 20 |
| 6  | 565.60  | 283.30          |                |                  | 547.58         | 274.30           | G    | 2203.41 | 1102.21         | 2186.37        | 1093.69          | 2185.39        | 1093.20          | 19 |
| 7  | 636.68  | 318.84          |                |                  | 618.66         | 309.83           | A    | 2146.35 | 1073.68         | 2129.32        | 1065.17          | 2128.34        | 1064.67          | 18 |
| 8  | 749.83  | 375.42          |                |                  | 731.82         | 366.41           | L    | 2075.28 | 1038.14         | 2058.25        | 1029.63          | 2057.26        | 1029.13          | 17 |
| 9  | 878.95  | 439.98          |                |                  | 860.93         | 430.97           | E    | 1962.12 | 981.56          | 1945.09        | 973.05           | 1944.10        | 972.56           | 16 |
| 10 | 1008.06 | 504.54          |                |                  | 990.05         | 495.53           | E    | 1833.00 | 917.01          | 1815.97        | 908.49           | 1814.99        | 908.00           | 15 |
| 11 | 1111.21 | 556.11          |                |                  | 1093.19        | 547.10           | C    | 1703.89 | 852.45          | 1686.86        | 843.93           | 1685.88        | 843.44           | 14 |
| 12 | 1274.38 | 637.69          |                |                  | 1256.36        | 628.69           | Y    | 1600.75 | 800.88          | 1583.72        | 792.36           | 1582.73        | 791.87           | 13 |
| 13 | 1373.51 | 687.26          |                |                  | 1355.49        | 678.25           | V    | 1437.57 | 719.29          | 1420.54        | 710.78           | 1419.56        | 710.28           | 12 |
| 14 | 1474.61 | 737.81          |                |                  | 1456.60        | 728.80           | T    | 1338.44 | 669.73          | 1321.41        | 661.21           | 1320.43        | 660.72           | 11 |
| 15 | 1603.73 | 802.37          |                |                  | 1585.71        | 793.36           | E    | 1237.34 | 619.17          | 1220.31        | 610.66           | 1219.32        | 610.17           | 10 |
| 16 | 1716.89 | 858.95          |                |                  | 1698.87        | 849.94           | I    | 1108.23 | 554.62          | 1091.19        | 546.10           | 1090.21        | 545.61           | 9  |
| 17 | 1831.97 | 916.49          |                |                  | 1813.96        | 907.48           | D    | 995.07  | 498.04          | 978.04         | 489.52           | 977.05         | 489.03           | 8  |
| 18 | 1960.10 | 980.56          | 1943.07        | 972.04           | 1942.09        | 971.55           | Q    | 879.98  | 440.49          | 862.95         | 431.98           | 861.96         | 431.49           | 7  |
| 19 | 2075.19 | 1038.10         | 2058.16        | 1029.58          | 2057.17        | 1029.09          | D    | 751.85  | 376.43          | 734.82         | 367.91           | 733.84         | 367.42           | 6  |
| 20 | 2203.36 | 1102.18         | 2186.33        | 1093.67          | 2185.35        | 1093.18          | K    | 636.76  | 318.89          | 619.73         | 310.37           |                |                  | 5  |
| 21 | 2366.54 | 1183.77         | 2349.50        | 1175.26          | 2348.52        | 1174.76          | Y    | 508.59  | 254.80          | 491.56         | 246.28           |                |                  | 4  |
| 22 | 2437.61 | 1219.31         | 2420.58        | 1210.80          | 2419.60        | 1210.30          | A    | 345.42  | 173.21          | 328.39         | 164.70           |                |                  | 3  |
| 23 | 2536.74 | 1268.88         | 2519.71        | 1260.36          | 2518.73        | 1259.87          | V    | 274.34  | 137.67          | 257.31         | 129.16           |                |                  | 2  |
| 24 |         |                 |                |                  |                |                  | R    | 175.21  | 88.11           | 158.18         | 79.59            |                |                  | 1  |

Gene Symbol: FLNA Sequences: YGGQVPNFPKSLQVEPAVDTSGVQC~~Y~~YGPQIEGQGVFR m/z: 1327.85 Charge: 3+ Ion score: 160.1

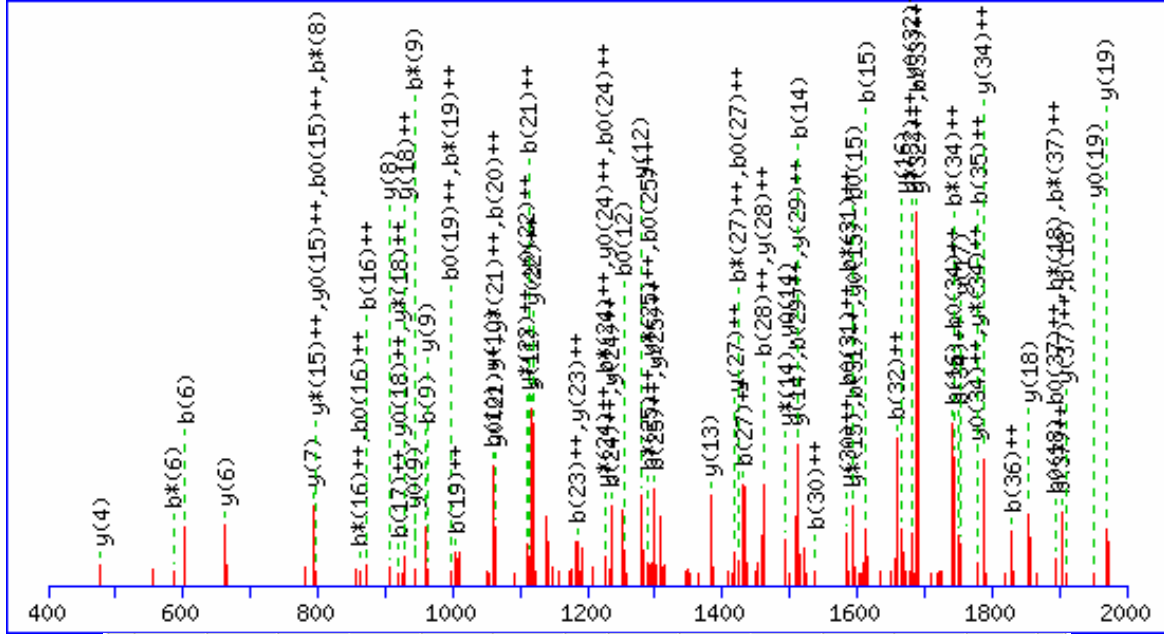

| #  | b       | b <sup>+</sup> | b <sup>+</sup> | b <sup>++</sup> | b <sup>0</sup> | b <sup>0+</sup> | Seq. | y       | y <sup>+</sup> | y <sup>+</sup> | y <sup>++</sup> | y <sup>0</sup> | y <sup>0+</sup> | #  |
|----|---------|----------------|----------------|-----------------|----------------|-----------------|------|---------|----------------|----------------|-----------------|----------------|-----------------|----|
| 1  | 164.18  | 82.59          |                |                 |                |                 | Y    |         |                |                |                 |                |                 | 38 |
| 2  | 221.23  | 111.12         |                |                 |                |                 | G    | 3817.22 | 1909.12        | 3800.19        | 1900.60         | 3799.21        | 1900.11         | 37 |
| 3  | 278.28  | 139.65         |                |                 |                |                 | G    | 3760.17 | 1880.59        | 3743.14        | 1872.07         | 3742.16        | 1871.58         | 36 |
| 4  | 406.41  | 203.71         | 389.38         | 195.20          |                |                 | Q    | 3703.12 | 1852.06        | 3686.09        | 1843.55         | 3685.10        | 1843.06         | 35 |
| 5  | 503.53  | 252.27         | 486.50         | 243.75          |                |                 | P    | 3574.99 | 1788.00        | 3557.96        | 1779.48         | 3556.98        | 1778.99         | 34 |
| 6  | 602.66  | 301.83         | 585.63         | 293.32          |                |                 | V    | 3477.88 | 1739.44        | 3460.84        | 1730.93         | 3459.86        | 1730.43         | 33 |
| 7  | 699.77  | 350.39         | 682.74         | 341.88          |                |                 | P    | 3378.74 | 1689.88        | 3361.71        | 1681.36         | 3360.73        | 1680.87         | 32 |
| 8  | 813.88  | 407.44         | 796.85         | 398.93          |                |                 | N    | 3281.63 | 1641.32        | 3264.60        | 1632.80         | 3263.61        | 1632.31         | 31 |
| 9  | 961.05  | 481.03         | 944.02         | 472.51          |                |                 | F    | 3167.53 | 1584.27        | 3150.50        | 1575.75         | 3149.51        | 1575.26         | 30 |
| 10 | 1058.17 | 529.59         | 1041.14        | 521.07          |                |                 | P    | 3020.35 | 1510.68        | 3003.32        | 1502.16         | 3002.34        | 1501.67         | 29 |
| 11 | 1145.24 | 573.13         | 1128.21        | 564.61          | 1127.23        | 564.12          | S    | 2923.24 | 1462.12        | 2906.21        | 1453.61         | 2905.22        | 1453.11         | 28 |
| 12 | 1273.42 | 637.21         | 1256.39        | 628.70          | 1255.40        | 628.20          | K    | 2836.16 | 1418.58        | 2819.13        | 1410.07         | 2818.14        | 1409.58         | 27 |
| 13 | 1386.57 | 693.79         | 1369.54        | 685.28          | 1368.56        | 684.78          | L    | 2707.99 | 1354.50        | 2690.96        | 1345.98         | 2689.97        | 1345.49         | 26 |
| 14 | 1514.70 | 757.86         | 1497.67        | 749.34          | 1496.69        | 748.85          | Q    | 2594.83 | 1297.92        | 2577.80        | 1289.40         | 2576.81        | 1288.91         | 25 |
| 15 | 1613.83 | 807.42         | 1596.80        | 798.91          | 1595.82        | 798.41          | V    | 2466.70 | 1233.85        | 2449.67        | 1225.34         | 2448.69        | 1224.85         | 24 |
| 16 | 1742.95 | 871.98         | 1725.92        | 863.46          | 1724.93        | 862.97          | E    | 2367.57 | 1184.29        | 2350.54        | 1175.77         | 2349.55        | 1175.28         | 23 |
| 17 | 1840.06 | 920.54         | 1823.03        | 912.02          | 1822.05        | 911.53          | P    | 2238.46 | 1119.73        | 2221.43        | 1111.22         | 2220.44        | 1110.72         | 22 |
| 18 | 1911.14 | 956.07         | 1894.11        | 947.56          | 1893.13        | 947.07          | A    | 2141.34 | 1071.17        | 2124.31        | 1062.66         | 2123.33        | 1062.17         | 21 |
| 19 | 2010.27 | 1005.64        | 1993.24        | 997.12          | 1992.26        | 996.63          | V    | 2070.26 | 1035.64        | 2053.23        | 1027.12         | 2052.25        | 1026.63         | 20 |
| 20 | 2125.36 | 1063.18        | 2108.33        | 1054.67         | 2107.34        | 1054.18         | D    | 1971.13 | 986.07         | 1954.10        | 977.55          | 1953.12        | 977.06          | 19 |
| 21 | 2226.46 | 1113.74        | 2209.43        | 1105.22         | 2208.45        | 1104.73         | T    | 1856.04 | 928.53         | 1839.01        | 920.01          | 1838.03        | 919.52          | 18 |
| 22 | 2313.54 | 1157.27        | 2296.51        | 1148.76         | 2295.53        | 1148.27         | S    | 1754.94 | 877.97         | 1737.91        | 869.46          | 1736.92        | 868.97          | 17 |
| 23 | 2370.59 | 1185.80        | 2353.56        | 1177.28         | 2352.58        | 1176.79         | G    | 1667.86 | 834.44         | 1650.83        | 825.92          | 1649.85        | 825.43          | 16 |
| 24 | 2469.72 | 1235.37        | 2452.69        | 1226.85         | 2451.71        | 1226.36         | V    | 1610.81 | 805.91         | 1593.78        | 797.39          | 1592.80        | 796.90          | 15 |
| 25 | 2597.85 | 1299.43        | 2580.82        | 1290.91         | 2579.84        | 1290.42         | Q    | 1511.68 | 756.34         | 1494.65        | 747.83          | 1493.67        | 747.34          | 14 |
| 26 | 2701.00 | 1351.00        | 2683.96        | 1342.49         | 2682.98        | 1341.99         | C    | 1383.55 | 692.28         | 1366.52        | 683.76          | 1365.54        | 683.27          | 13 |
| 27 | 2864.17 | 1432.59        | 2847.14        | 1424.07         | 2846.15        | 1423.58         | Y    | 1280.41 | 640.71         | 1263.38        | 632.19          | 1262.39        | 631.70          | 12 |
| 28 | 2921.22 | 1461.11        | 2904.19        | 1452.60         | 2903.20        | 1452.11         | G    | 1117.24 | 559.12         | 1100.20        | 550.61          | 1099.22        | 550.11          | 11 |
| 29 | 3018.33 | 1509.67        | 3001.30        | 1501.16         | 3000.32        | 1500.66         | P    | 1060.18 | 530.60         | 1043.15        | 522.08          | 1042.17        | 521.59          | 10 |
| 30 | 3075.39 | 1538.20        | 3058.36        | 1529.68         | 3057.37        | 1529.19         | G    | 963.07  | 482.04         | 946.04         | 473.52          | 945.05         | 473.03          | 9  |
| 31 | 3188.54 | 1594.78        | 3171.51        | 1586.26         | 3170.53        | 1585.77         | I    | 906.02  | 453.51         | 888.99         | 445.00          | 888.00         | 444.50          | 8  |
| 32 | 3317.66 | 1659.33        | 3300.63        | 1650.82         | 3299.64        | 1650.33         | E    | 792.86  | 396.93         | 775.83         | 388.42          | 774.84         | 387.93          | 7  |
| 33 | 3374.71 | 1687.86        | 3357.68        | 1679.34         | 3356.69        | 1678.85         | G    | 663.75  | 332.38         | 646.72         | 323.86          |                |                 | 6  |
| 34 | 3502.84 | 1751.92        | 3485.81        | 1743.41         | 3484.82        | 1742.92         | Q    | 606.69  | 303.85         | 589.66         | 295.34          |                |                 | 5  |
| 35 | 3559.89 | 1780.45        | 3542.86        | 1771.93         | 3541.87        | 1771.44         | G    | 478.57  | 239.79         | 461.53         | 231.27          |                |                 | 4  |
| 36 | 3659.02 | 1830.01        | 3641.99        | 1821.50         | 3641.01        | 1821.01         | V    | 421.51  | 211.26         | 404.48         | 202.75          |                |                 | 3  |
| 37 | 3806.19 | 1903.60        | 3789.16        | 1895.09         | 3788.18        | 1894.59         | F    | 322.38  | 161.70         | 305.35         | 153.18          |                |                 | 2  |
| 38 |         |                |                |                 |                |                 | R    | 175.21  | 88.11          | 158.18         | 79.59           |                |                 | 1  |

Gene Symbol  
FLNB

Sequences  
AGSNMLLIGVHGPTTP**C**EEVSMK

m/z  
791.82

Charge  
3+

Ion score  
96.1

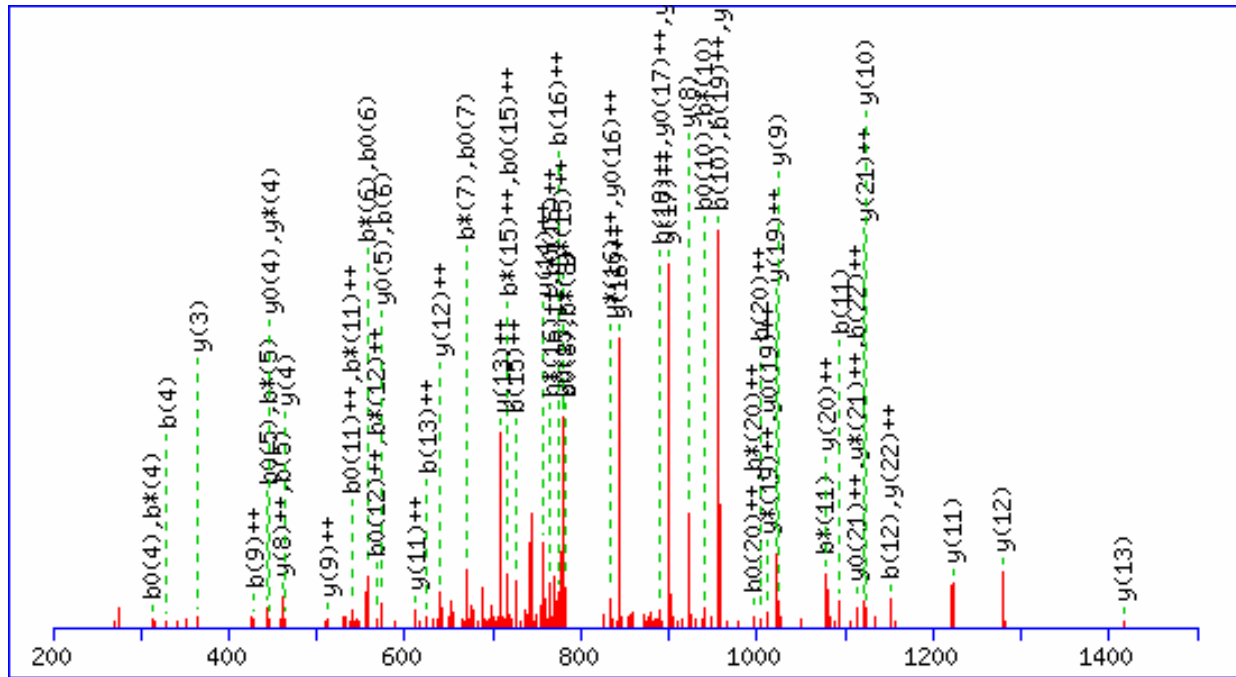

| #  | b       | b <sup>++</sup> | b <sup>+</sup> | b <sup>+++</sup> | b <sup>0</sup> | b <sup>0++</sup> | Seq. | y       | y <sup>++</sup> | y <sup>+</sup> | y <sup>+++</sup> | y <sup>0</sup> | y <sup>0++</sup> | #  |
|----|---------|-----------------|----------------|------------------|----------------|------------------|------|---------|-----------------|----------------|------------------|----------------|------------------|----|
| 1  | 72.09   | 36.55           |                |                  |                |                  | A    |         |                 |                |                  |                |                  | 23 |
| 2  | 129.14  | 65.07           |                |                  |                |                  | G    | 2301.68 | 1151.35         | 2284.65        | 1142.83          | 2283.67        | 1142.34          | 22 |
| 3  | 216.21  | 108.61          |                |                  | 198.20         | 99.60            | S    | 2244.63 | 1122.82         | 2227.60        | 1114.30          | 2226.62        | 1113.81          | 21 |
| 4  | 330.32  | 165.66          | 313.29         | 157.15           | 312.30         | 156.65           | N    | 2157.55 | 1079.28         | 2140.52        | 1070.77          | 2139.54        | 1070.27          | 20 |
| 5  | 461.51  | 231.26          | 444.48         | 222.75           | 443.50         | 222.25           | M    | 2043.45 | 1022.23         | 2026.42        | 1013.71          | 2025.44        | 1013.22          | 19 |
| 6  | 574.67  | 287.84          | 557.64         | 279.32           | 556.66         | 278.83           | L    | 1912.25 | 956.63          | 1895.22        | 948.12           | 1894.24        | 947.62           | 18 |
| 7  | 687.83  | 344.42          | 670.80         | 335.90           | 669.81         | 335.41           | L    | 1799.10 | 900.05          | 1782.07        | 891.54           | 1781.08        | 891.04           | 17 |
| 8  | 800.99  | 401.00          | 783.96         | 392.48           | 782.97         | 391.99           | I    | 1685.94 | 843.47          | 1668.91        | 834.96           | 1667.92        | 834.47           | 16 |
| 9  | 858.04  | 429.52          | 841.01         | 421.01           | 840.02         | 420.51           | G    | 1572.78 | 786.90          | 1555.75        | 778.38           | 1554.77        | 777.89           | 15 |
| 10 | 957.17  | 479.09          | 940.14         | 470.57           | 939.15         | 470.08           | V    | 1515.73 | 758.37          | 1498.70        | 749.85           | 1497.72        | 749.36           | 14 |
| 11 | 1094.31 | 547.66          | 1077.28        | 539.14           | 1076.29        | 538.65           | H    | 1416.60 | 708.80          | 1399.57        | 700.29           | 1398.58        | 699.80           | 13 |
| 12 | 1151.36 | 576.18          | 1134.33        | 567.67           | 1133.34        | 567.18           | G    | 1279.46 | 640.23          | 1262.43        | 631.72           | 1261.45        | 631.23           | 12 |
| 13 | 1248.47 | 624.74          | 1231.44        | 616.23           | 1230.46        | 615.73           | P    | 1222.41 | 611.71          | 1205.38        | 603.19           | 1204.39        | 602.70           | 11 |
| 14 | 1349.58 | 675.29          | 1332.55        | 666.78           | 1331.56        | 666.29           | T    | 1125.29 | 563.15          | 1108.26        | 554.64           | 1107.28        | 554.14           | 10 |
| 15 | 1450.68 | 725.84          | 1433.65        | 717.33           | 1432.67        | 716.84           | T    | 1024.19 | 512.60          | 1007.16        | 504.08           | 1006.17        | 503.59           | 9  |
| 16 | 1547.80 | 774.40          | 1530.77        | 765.89           | 1529.78        | 765.39           | P    | 923.09  | 462.05          | 906.06         | 453.53           | 905.07         | 453.04           | 8  |
| 17 | 1650.94 | 825.97          | 1633.91        | 817.46           | 1632.92        | 816.97           | C    | 825.97  | 413.49          | 808.94         | 404.97           | 807.96         | 404.48           | 7  |
| 18 | 1780.05 | 890.53          | 1763.02        | 882.02           | 1762.04        | 881.52           | E    | 722.83  | 361.92          | 705.80         | 353.40           | 704.81         | 352.91           | 6  |
| 19 | 1909.17 | 955.09          | 1892.14        | 946.57           | 1891.15        | 946.08           | E    | 593.71  | 297.36          | 576.68         | 288.85           | 575.70         | 288.35           | 5  |
| 20 | 2008.30 | 1004.65         | 1991.27        | 996.14           | 1990.28        | 995.65           | V    | 464.60  | 232.80          | 447.57         | 224.29           | 446.58         | 223.80           | 4  |
| 21 | 2095.38 | 1048.19         | 2078.35        | 1039.68          | 2077.36        | 1039.18          | S    | 365.47  | 183.24          | 348.44         | 174.72           | 347.45         | 174.23           | 3  |
| 22 | 2226.57 | 1113.79         | 2209.54        | 1105.27          | 2208.56        | 1104.78          | M    | 278.39  | 139.70          | 261.36         | 131.18           |                |                  | 2  |
| 23 |         |                 |                |                  |                |                  | K    | 147.20  | 74.10           | 130.17         | 65.59            |                |                  | 1  |

Gene Symbol  
FLNB

Sequences  
AHIANPSGASTE**C**FVTDNADGTYQVEYTPFEK

m/z  
1155.23

Charge  
3+

Ion score  
109.8

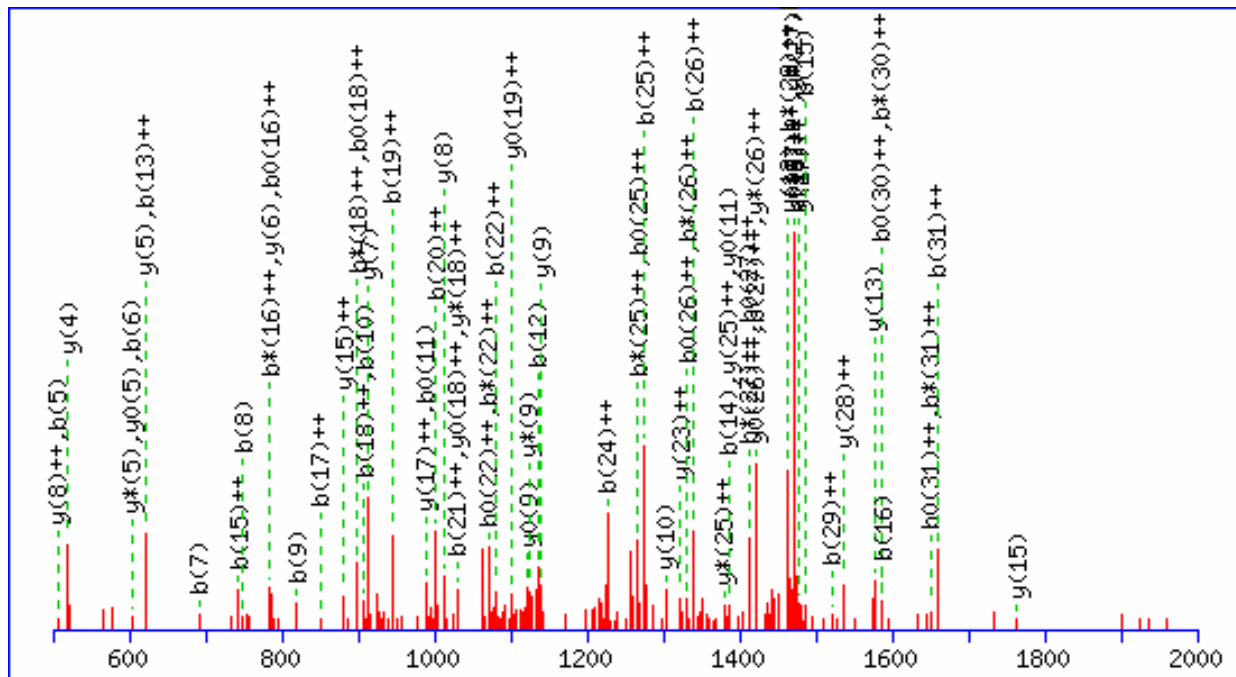

| #  | b              | b <sup>++</sup> | b <sup>+</sup> | b <sup>+++</sup> | b <sup>0</sup> | b <sup>0++</sup> | Seq. | y              | y <sup>++</sup> | y <sup>+</sup> | y <sup>+++</sup> | y <sup>0</sup> | y <sup>0++</sup> | #  |
|----|----------------|-----------------|----------------|------------------|----------------|------------------|------|----------------|-----------------|----------------|------------------|----------------|------------------|----|
| 1  | 72.09          | 36.55           |                |                  |                |                  | A    |                |                 |                |                  |                |                  | 32 |
| 2  | 209.23         | 105.12          |                |                  |                |                  | H    | 3393.58        | 1697.29         | 3376.55        | 1688.78          | 3375.56        | 1688.29          | 31 |
| 3  | 322.38         | 161.70          |                |                  |                |                  | I    | 3256.44        | 1628.72         | 3239.41        | 1620.21          | 3238.43        | 1619.72          | 30 |
| 4  | 393.46         | 197.23          |                |                  |                |                  | A    | 3143.28        | 1572.15         | 3126.25        | 1563.63          | 3125.27        | 1563.14          | 29 |
| 5  | <b>507.56</b>  | 254.29          | 490.53         | 245.77           |                |                  | N    | 3072.21        | <b>1536.61</b>  | 3055.17        | 1528.09          | 3054.19        | 1527.60          | 28 |
| 6  | <b>604.68</b>  | 302.84          | 587.65         | 294.33           |                |                  | P    | 2958.10        | <b>1479.56</b>  | 2941.07        | <b>1471.04</b>   | 2940.09        | <b>1470.55</b>   | 27 |
| 7  | <b>691.76</b>  | 346.38          | 674.73         | 337.87           | 673.74         | 337.37           | S    | 2860.99        | 1431.00         | 2843.96        | <b>1422.48</b>   | 2842.97        | <b>1421.99</b>   | 26 |
| 8  | <b>748.81</b>  | 374.91          | 731.78         | 366.39           | 730.79         | 365.90           | G    | 2773.91        | <b>1387.46</b>  | 2756.88        | <b>1378.94</b>   | 2755.89        | 1378.45          | 25 |
| 9  | <b>819.88</b>  | 410.45          | 802.85         | 401.93           | 801.87         | 401.44           | A    | 2716.86        | 1358.93         | 2699.83        | 1350.42          | 2698.84        | 1349.93          | 24 |
| 10 | <b>906.96</b>  | 453.99          | 889.93         | 445.47           | 888.95         | 444.98           | S    | 2645.78        | <b>1323.39</b>  | 2628.75        | 1314.88          | 2627.77        | 1314.39          | 23 |
| 11 | 1008.07        | 504.54          | 991.04         | 496.02           | <b>990.05</b>  | 495.53           | T    | 2558.70        | 1279.86         | 2541.67        | 1271.34          | 2540.69        | 1270.85          | 22 |
| 12 | <b>1137.18</b> | 569.09          | 1120.15        | 560.58           | 1119.16        | 560.09           | E    | 2457.60        | 1229.30         | 2440.57        | 1220.79          | 2439.58        | 1220.30          | 21 |
| 13 | 1240.32        | <b>620.67</b>   | 1223.29        | 612.15           | 1222.31        | 611.66           | C    | 2328.49        | 1164.75         | 2311.46        | 1156.23          | 2310.47        | 1155.74          | 20 |
| 14 | <b>1387.50</b> | 694.25          | 1370.47        | 685.74           | 1369.48        | 685.24           | F    | 2225.34        | 1113.18         | 2208.31        | 1104.66          | 2207.33        | <b>1104.17</b>   | 19 |
| 15 | <b>1486.63</b> | <b>743.82</b>   | 1469.60        | 735.30           | 1468.61        | 734.81           | V    | 2078.17        | 1039.59         | 2061.14        | <b>1031.07</b>   | 2060.15        | <b>1030.58</b>   | 18 |
| 16 | <b>1587.73</b> | 794.37          | 1570.70        | <b>785.85</b>    | 1569.72        | <b>785.36</b>    | T    | 1979.04        | <b>990.02</b>   | 1962.01        | 981.51           | 1961.02        | 981.02           | 17 |
| 17 | 1702.82        | <b>851.91</b>   | 1685.79        | 843.40           | 1684.80        | 842.91           | D    | 1877.93        | 939.47          | 1860.90        | 930.96           | 1859.92        | 930.46           | 16 |
| 18 | 1816.92        | <b>908.96</b>   | 1799.89        | <b>900.45</b>    | 1798.91        | <b>899.96</b>    | N    | <b>1762.85</b> | <b>881.93</b>   | 1745.82        | 873.41           | 1744.83        | 872.92           | 15 |
| 19 | 1888.00        | <b>944.50</b>   | 1870.97        | 935.99           | 1869.98        | 935.50           | A    | 1648.74        | 824.88          | 1631.71        | 816.36           | 1630.73        | 815.87           | 14 |
| 20 | 2003.09        | <b>1002.05</b>  | 1986.06        | 993.53           | 1985.07        | 993.04           | D    | <b>1577.67</b> | 789.34          | 1560.64        | 780.82           | 1559.65        | 780.33           | 13 |
| 21 | 2060.14        | <b>1030.57</b>  | 2043.11        | 1022.06          | 2042.12        | 1021.57          | G    | <b>1462.58</b> | 731.79          | 1445.55        | 723.28           | 1444.56        | 722.79           | 12 |
| 22 | 2161.24        | <b>1081.13</b>  | 2144.21        | <b>1072.61</b>   | 2143.23        | <b>1072.12</b>   | T    | 1405.53        | 703.27          | 1388.50        | 694.75           | <b>1387.51</b> | 694.26           | 11 |
| 23 | 2324.42        | 1162.71         | 2307.39        | 1154.20          | 2306.40        | 1153.70          | Y    | <b>1304.42</b> | 652.72          | 1287.39        | 644.20           | 1286.41        | 643.71           | 10 |
| 24 | 2452.54        | <b>1226.78</b>  | 2435.51        | 1218.26          | 2434.53        | 1217.77          | Q    | <b>1141.25</b> | 571.13          | <b>1124.22</b> | 562.61           | <b>1123.23</b> | 562.12           | 9  |
| 25 | 2551.68        | <b>1276.34</b>  | 2534.65        | <b>1267.83</b>   | 2533.66        | <b>1267.33</b>   | V    | <b>1013.12</b> | <b>507.06</b>   | 996.09         | 498.55           | 995.11         | 498.06           | 8  |
| 26 | 2680.79        | <b>1340.90</b>  | 2663.76        | <b>1332.38</b>   | 2662.77        | <b>1331.89</b>   | E    | <b>913.99</b>  | 457.50          | 896.96         | 448.98           | 895.97         | 448.49           | 7  |
| 27 | 2843.96        | <b>1422.49</b>  | 2826.93        | <b>1413.97</b>   | 2825.95        | <b>1413.48</b>   | Y    | <b>784.88</b>  | 392.94          | 767.85         | 384.43           | 766.86         | 383.93           | 6  |
| 28 | 2945.07        | <b>1473.04</b>  | 2928.04        | <b>1464.52</b>   | 2927.05        | <b>1464.03</b>   | T    | <b>621.70</b>  | 311.36          | <b>604.67</b>  | 302.84           | <b>603.69</b>  | 302.35           | 5  |
| 29 | 3042.18        | <b>1521.60</b>  | 3025.15        | 1513.08          | 3024.17        | 1512.59          | P    | <b>520.60</b>  | 260.80          | 503.57         | 252.29           | 502.58         | 251.80           | 4  |
| 30 | 3189.36        | 1595.18         | 3172.33        | <b>1586.67</b>   | 3171.34        | <b>1586.17</b>   | F    | 423.48         | 212.25          | 406.45         | 203.73           | 405.47         | 203.24           | 3  |
| 31 | 3318.47        | <b>1659.74</b>  | 3301.44        | <b>1651.22</b>   | 3300.46        | <b>1650.73</b>   | E    | 276.31         | 138.66          | 259.28         | 130.14           | 258.29         | 129.65           | 2  |
| 32 |                |                 |                |                  |                |                  | K    | 147.20         | 74.10           | 130.17         | 65.59            |                |                  | 1  |

Gene Symbol  
FLNB

Sequences  
CLATGPGIASTVK

m/z  
610.12

Charge  
2+

Ion score  
79.3

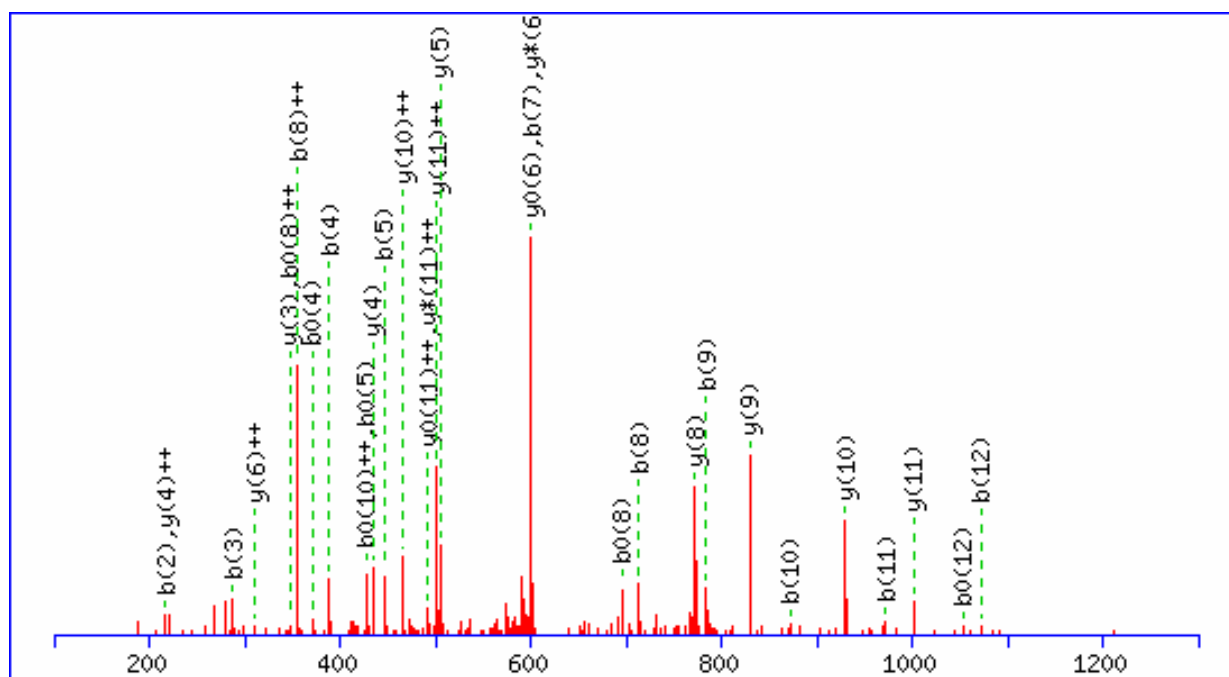

| #  | b       | b <sup>++</sup> | b <sup>0</sup> | b <sup>0++</sup> | Seq. | y       | y <sup>++</sup> | y <sup>*</sup> | y <sup>*++</sup> | y <sup>0</sup> | y <sup>0++</sup> | #  |
|----|---------|-----------------|----------------|------------------|------|---------|-----------------|----------------|------------------|----------------|------------------|----|
| 1  | 104.15  | 52.58           |                |                  | C    |         |                 |                |                  |                |                  | 13 |
| 2  | 217.31  | 109.16          |                |                  | L    | 1115.30 | 558.15          | 1098.27        | 549.64           | 1097.29        | 549.15           | 12 |
| 3  | 288.39  | 144.70          |                |                  | A    | 1002.14 | 501.58          | 985.11         | 493.06           | 984.13         | 492.57           | 11 |
| 4  | 389.49  | 195.25          | 371.47         | 186.24           | T    | 931.07  | 466.04          | 914.03         | 457.52           | 913.05         | 457.03           | 10 |
| 5  | 446.54  | 223.77          | 428.53         | 214.77           | G    | 829.96  | 415.48          | 812.93         | 406.97           | 811.95         | 406.48           | 9  |
| 6  | 543.66  | 272.33          | 525.64         | 263.32           | P    | 772.91  | 386.96          | 755.88         | 378.44           | 754.89         | 377.95           | 8  |
| 7  | 600.71  | 300.86          | 582.69         | 291.85           | G    | 675.79  | 338.40          | 658.76         | 329.89           | 657.78         | 329.39           | 7  |
| 8  | 713.87  | 357.44          | 695.85         | 348.43           | I    | 618.74  | 309.88          | 601.71         | 301.36           | 600.73         | 300.87           | 6  |
| 9  | 784.94  | 392.98          | 766.93         | 383.97           | A    | 505.59  | 253.30          | 488.56         | 244.78           | 487.57         | 244.29           | 5  |
| 10 | 872.02  | 436.51          | 854.01         | 427.51           | S    | 434.51  | 217.76          | 417.48         | 209.24           | 416.49         | 208.75           | 4  |
| 11 | 973.12  | 487.07          | 955.11         | 478.06           | T    | 347.43  | 174.22          | 330.40         | 165.70           | 329.42         | 165.21           | 3  |
| 12 | 1072.26 | 536.63          | 1054.24        | 527.62           | V    | 246.33  | 123.67          | 229.30         | 115.15           |                |                  | 2  |
| 13 |         |                 |                |                  | K    | 147.20  | 74.10           | 130.16         | 65.59            |                |                  | 1  |

Gene Symbol: FLNB Sequences: DAGYGGISLAVEGSPKVDIQTEDLEDGTCCK m/z: 1023.76 Charge: 3+ Ion score: 58.9

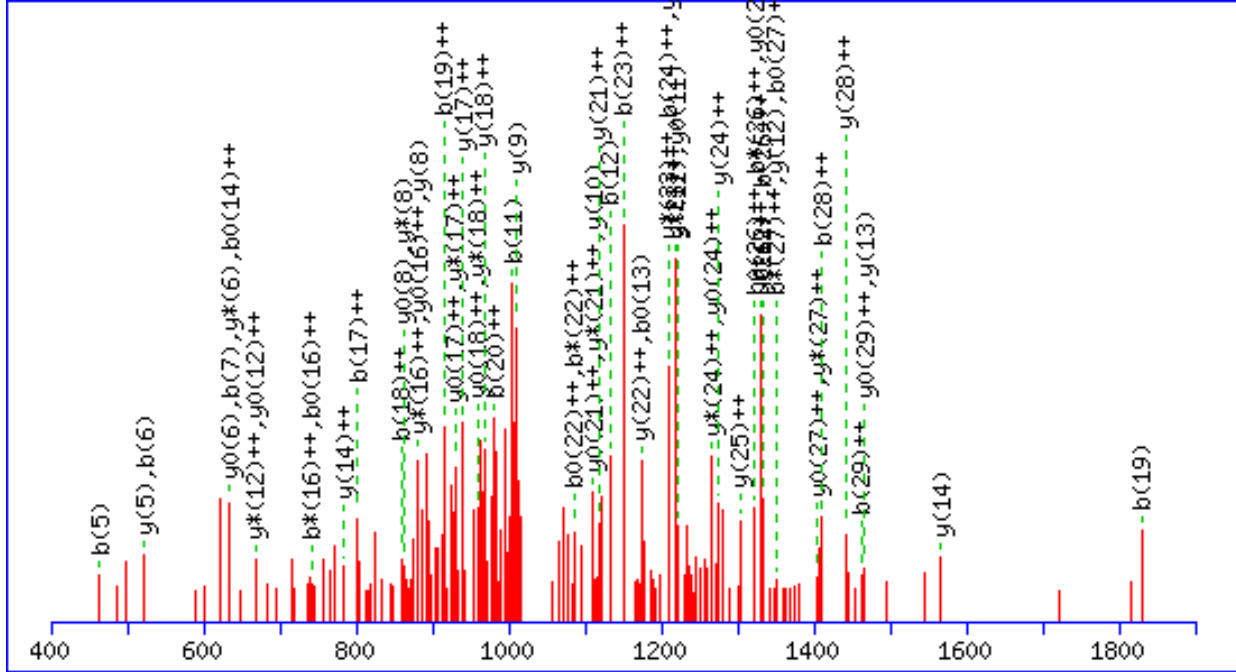

| #  | b       | b <sup>++</sup> | b <sup>+</sup> | b <sup>++</sup> | b <sup>0</sup> | b <sup>0++</sup> | Seq. | y       | y <sup>++</sup> | y <sup>+</sup> | y <sup>++</sup> | y <sup>0</sup> | y <sup>0++</sup> | #  |
|----|---------|-----------------|----------------|-----------------|----------------|------------------|------|---------|-----------------|----------------|-----------------|----------------|------------------|----|
| 1  | 116.10  | 58.55           |                |                 | 98.08          | 49.54            | D    |         |                 |                |                 |                |                  | 30 |
| 2  | 187.17  | 94.09           |                |                 | 169.16         | 85.08            | A    | 2954.20 | 1477.60         | 2937.17        | 1469.09         | 2936.18        | 1468.60          | 29 |
| 3  | 244.22  | 122.62          |                |                 | 226.21         | 113.61           | G    | 2883.12 | 1442.06         | 2866.09        | 1433.55         | 2865.11        | 1433.06          | 28 |
| 4  | 407.40  | 204.20          |                |                 | 389.38         | 195.20           | Y    | 2826.07 | 1413.54         | 2809.04        | 1405.02         | 2808.06        | 1404.53          | 27 |
| 5  | 464.45  | 232.73          |                |                 | 446.43         | 223.72           | G    | 2662.90 | 1331.95         | 2645.87        | 1323.44         | 2644.88        | 1322.95          | 26 |
| 6  | 521.50  | 261.25          |                |                 | 503.49         | 252.25           | G    | 2605.85 | 1303.43         | 2588.82        | 1294.91         | 2587.83        | 1294.42          | 25 |
| 7  | 634.66  | 317.83          |                |                 | 616.64         | 308.83           | I    | 2548.79 | 1274.90         | 2531.76        | 1266.39         | 2530.78        | 1265.89          | 24 |
| 8  | 721.74  | 361.37          |                |                 | 703.72         | 352.36           | S    | 2435.64 | 1218.32         | 2418.61        | 1209.81         | 2417.62        | 1209.31          | 23 |
| 9  | 834.89  | 417.95          |                |                 | 816.88         | 408.94           | L    | 2348.56 | 1174.78         | 2331.53        | 1166.27         | 2330.54        | 1165.78          | 22 |
| 10 | 905.97  | 453.49          |                |                 | 887.96         | 444.48           | A    | 2235.40 | 1118.21         | 2218.37        | 1109.69         | 2217.39        | 1109.20          | 21 |
| 11 | 1005.10 | 503.05          |                |                 | 987.09         | 494.05           | V    | 2164.32 | 1082.67         | 2147.29        | 1074.15         | 2146.31        | 1073.66          | 20 |
| 12 | 1134.22 | 567.61          |                |                 | 1116.20        | 558.60           | E    | 2065.19 | 1033.10         | 2048.16        | 1024.59         | 2047.18        | 1024.09          | 19 |
| 13 | 1191.27 | 596.14          |                |                 | 1173.25        | 587.13           | G    | 1936.08 | 968.54          | 1919.05        | 960.03          | 1918.06        | 959.54           | 18 |
| 14 | 1288.38 | 644.70          |                |                 | 1270.37        | 635.69           | P    | 1879.03 | 940.02          | 1862.00        | 931.50          | 1861.01        | 931.01           | 17 |
| 15 | 1375.46 | 688.23          |                |                 | 1357.44        | 679.23           | S    | 1781.91 | 891.46          | 1764.88        | 882.95          | 1763.90        | 882.45           | 16 |
| 16 | 1503.63 | 752.32          | 1486.60        | 743.80          | 1485.62        | 743.31           | K    | 1694.84 | 847.92          | 1677.80        | 839.41          | 1676.82        | 838.91           | 15 |
| 17 | 1602.76 | 801.89          | 1585.73        | 793.37          | 1584.75        | 792.88           | V    | 1566.66 | 783.84          | 1549.63        | 775.32          | 1548.65        | 774.83           | 14 |
| 18 | 1717.85 | 859.43          | 1700.82        | 850.91          | 1699.84        | 850.42           | D    | 1467.53 | 734.27          | 1450.50        | 725.75          | 1449.52        | 725.26           | 13 |
| 19 | 1831.01 | 916.01          | 1813.98        | 907.49          | 1812.99        | 907.00           | I    | 1352.44 | 676.73          | 1335.41        | 668.21          | 1334.43        | 667.72           | 12 |
| 20 | 1959.14 | 980.07          | 1942.11        | 971.56          | 1941.12        | 971.06           | Q    | 1239.29 | 620.15          | 1222.26        | 611.63          | 1221.27        | 611.14           | 11 |
| 21 | 2060.24 | 1030.62         | 2043.21        | 1022.11         | 2042.23        | 1021.62          | T    | 1111.16 | 556.08          | 1094.13        | 547.57          | 1093.14        | 547.08           | 10 |
| 22 | 2189.36 | 1095.18         | 2172.32        | 1086.67         | 2171.34        | 1086.17          | E    | 1010.05 | 505.53          | 993.02         | 497.02          | 992.04         | 496.52           | 9  |
| 23 | 2304.44 | 1152.73         | 2287.41        | 1144.21         | 2286.43        | 1143.72          | D    | 880.94  | 440.97          | 863.91         | 432.46          | 862.92         | 431.97           | 8  |
| 24 | 2417.60 | 1209.30         | 2400.57        | 1200.79         | 2399.58        | 1200.30          | L    | 765.85  | 383.43          | 748.82         | 374.92          | 747.84         | 374.42           | 7  |
| 25 | 2546.71 | 1273.86         | 2529.68        | 1265.35         | 2528.70        | 1264.85          | E    | 652.70  | 326.85          | 635.66         | 318.34          | 634.68         | 317.84           | 6  |
| 26 | 2661.80 | 1331.40         | 2644.77        | 1322.89         | 2643.79        | 1322.40          | D    | 523.58  | 262.29          | 506.55         | 253.78          | 505.57         | 253.29           | 5  |
| 27 | 2718.85 | 1359.93         | 2701.82        | 1351.42         | 2700.84        | 1350.92          | G    | 408.49  | 204.75          | 391.46         | 196.24          | 390.48         | 195.74           | 4  |
| 28 | 2819.96 | 1410.48         | 2802.93        | 1401.97         | 2801.94        | 1401.47          | T    | 351.44  | 176.23          | 334.41         | 167.71          | 333.43         | 167.22           | 3  |
| 29 | 2923.10 | 1462.05         | 2906.07        | 1453.54         | 2905.08        | 1453.05          | C    | 250.34  | 125.67          | 233.31         | 117.16          |                |                  | 2  |
| 30 |         |                 |                |                 |                |                  | K    | 147.20  | 74.10           | 130.17         | 65.59           |                |                  | 1  |

Gene Symbol  
FLNB

Sequences  
GAGTGGLGLTVEGP**C**EAK

m/z  
809.68

Charge  
2+

Ion score  
89.6

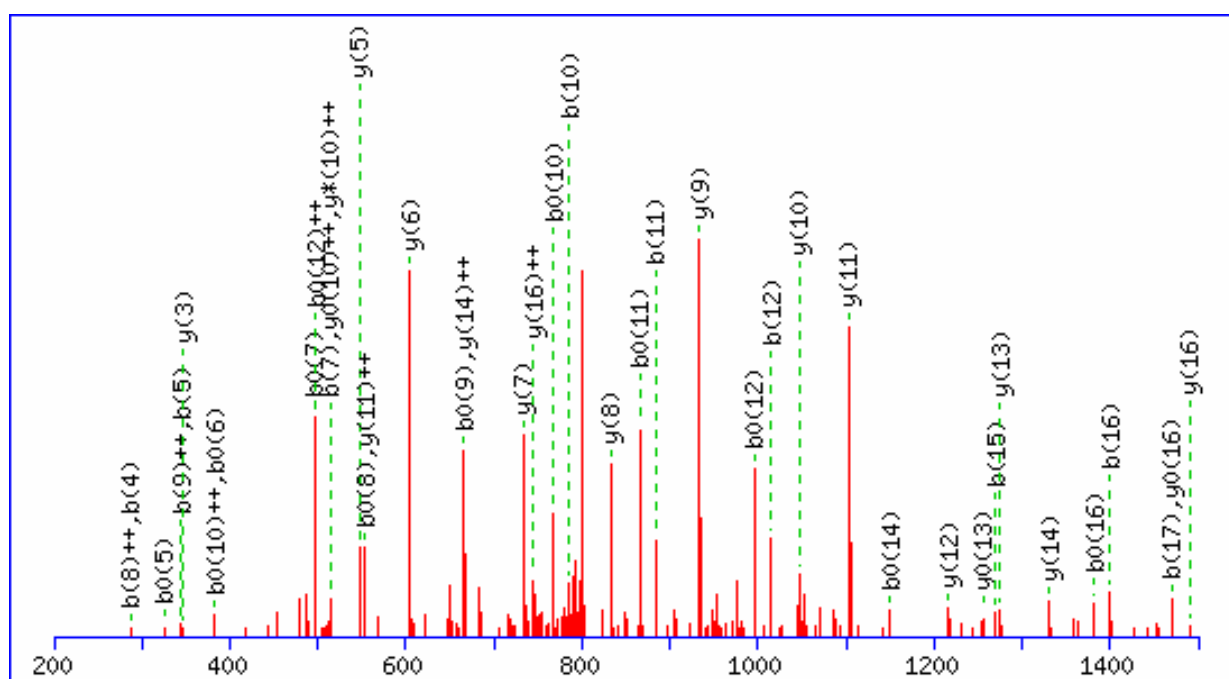

| #  | b       | b <sup>++</sup> | b <sup>0</sup> | b <sup>0++</sup> | Seq. | y       | y <sup>++</sup> | y <sup>*</sup> | y <sup>*++</sup> | y <sup>0</sup> | y <sup>0++</sup> | #  |
|----|---------|-----------------|----------------|------------------|------|---------|-----------------|----------------|------------------|----------------|------------------|----|
| 1  | 58.06   | 29.53           |                |                  | G    |         |                 |                |                  |                |                  | 18 |
| 2  | 129.14  | 65.07           |                |                  | A    | 1560.75 | 780.88          | 1543.72        | 772.36           | 1542.73        | 771.87           | 17 |
| 3  | 186.19  | 93.60           |                |                  | G    | 1489.67 | 745.34          | 1472.64        | 736.82           | 1471.65        | 736.33           | 16 |
| 4  | 287.29  | 144.15          | 269.28         | 135.14           | T    | 1432.62 | 716.81          | 1415.59        | 708.30           | 1414.60        | 707.81           | 15 |
| 5  | 344.34  | 172.68          | 326.33         | 163.67           | G    | 1331.51 | 666.26          | 1314.48        | 657.75           | 1313.50        | 657.25           | 14 |
| 6  | 401.39  | 201.20          | 383.38         | 192.19           | G    | 1274.46 | 637.74          | 1257.43        | 629.22           | 1256.45        | 628.73           | 13 |
| 7  | 514.55  | 257.78          | 496.54         | 248.77           | L    | 1217.41 | 609.21          | 1200.38        | 600.69           | 1199.40        | 600.20           | 12 |
| 8  | 571.60  | 286.31          | 553.59         | 277.30           | G    | 1104.25 | 552.63          | 1087.22        | 544.12           | 1086.24        | 543.62           | 11 |
| 9  | 684.76  | 342.88          | 666.75         | 333.88           | L    | 1047.20 | 524.11          | 1030.17        | 515.59           | 1029.19        | 515.10           | 10 |
| 10 | 785.87  | 393.44          | 767.85         | 384.43           | T    | 934.05  | 467.53          | 917.02         | 459.01           | 916.03         | 458.52           | 9  |
| 11 | 885.00  | 443.00          | 866.98         | 433.99           | V    | 832.94  | 416.97          | 815.91         | 408.46           | 814.93         | 407.97           | 8  |
| 12 | 1014.11 | 507.56          | 996.10         | 498.55           | E    | 733.81  | 367.41          | 716.78         | 358.89           | 715.80         | 358.40           | 7  |
| 13 | 1071.16 | 536.08          | 1053.15        | 527.08           | G    | 604.70  | 302.85          | 587.67         | 294.34           | 586.68         | 293.84           | 6  |
| 14 | 1168.28 | 584.64          | 1150.26        | 575.63           | P    | 547.65  | 274.33          | 530.62         | 265.81           | 529.63         | 265.32           | 5  |
| 15 | 1271.42 | 636.21          | 1253.40        | 627.21           | C    | 450.53  | 225.77          | 433.50         | 217.25           | 432.52         | 216.76           | 4  |
| 16 | 1400.53 | 700.77          | 1382.52        | 691.76           | E    | 347.39  | 174.20          | 330.36         | 165.68           | 329.37         | 165.19           | 3  |
| 17 | 1471.61 | 736.31          | 1453.60        | 727.30           | A    | 218.27  | 109.64          | 201.24         | 101.13           |                |                  | 2  |
| 18 |         |                 |                |                  | K    | 147.20  | 74.10           | 130.16         | 65.59            |                |                  | 1  |



Gene Symbol  
FLNB

Sequences  
SPFVVQVG**EAC**NP**NA**CR

m/z  
959.11

Charge  
2+

Ion score  
106.3

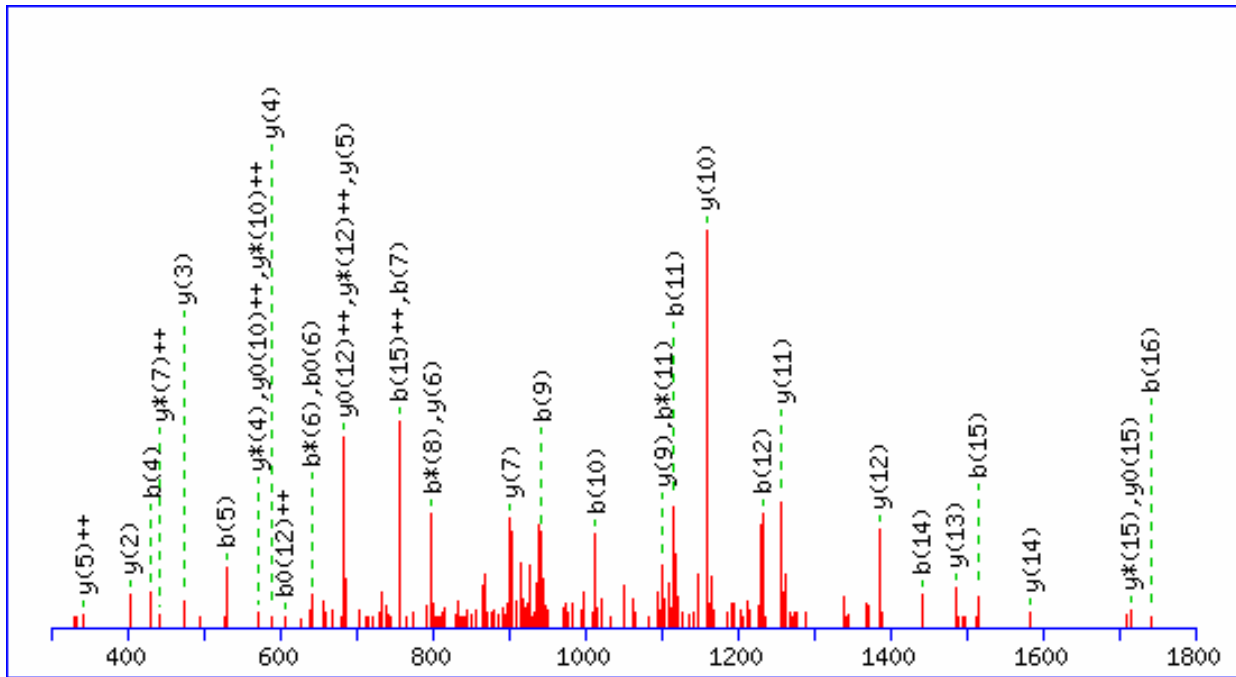

**C16 : NEM (C)**

| #  | b              | b <sup>++</sup> | b <sup>*</sup> | b <sup>+++</sup> | b <sup>0</sup> | b <sup>0++</sup> | Seq. | y              | y <sup>++</sup> | y <sup>*</sup> | y <sup>+++</sup> | y <sup>0</sup> | y <sup>0++</sup> | #  |
|----|----------------|-----------------|----------------|------------------|----------------|------------------|------|----------------|-----------------|----------------|------------------|----------------|------------------|----|
| 1  | 88.09          | 44.55           |                |                  | 70.07          | 35.54            | S    |                |                 |                |                  |                |                  | 17 |
| 2  | 185.20         | 93.10           |                |                  | 167.19         | 84.10            | P    | 1830.07        | 915.54          | 1813.04        | 907.03           | 1812.06        | 906.53           | 16 |
| 3  | 332.37         | 166.69          |                |                  | 314.36         | 157.68           | F    | 1732.96        | 866.98          | <b>1715.93</b> | 858.47           | <b>1714.94</b> | 857.98           | 15 |
| 4  | <b>431.51</b>  | 216.26          |                |                  | 413.49         | 207.25           | V    | <b>1585.78</b> | 793.40          | 1568.75        | 784.88           | 1567.77        | 784.39           | 14 |
| 5  | <b>530.64</b>  | 265.82          |                |                  | 512.62         | 256.81           | V    | <b>1486.65</b> | 743.83          | 1469.62        | 735.32           | 1468.64        | 734.82           | 13 |
| 6  | 658.77         | 329.89          | <b>641.74</b>  | 321.37           | <b>640.75</b>  | 320.88           | Q    | <b>1387.52</b> | 694.26          | 1370.49        | <b>685.75</b>    | 1369.51        | <b>685.26</b>    | 12 |
| 7  | <b>757.90</b>  | 379.45          | 740.87         | 370.94           | 739.88         | 370.44           | V    | <b>1259.39</b> | 630.20          | 1242.36        | 621.69           | 1241.38        | 621.19           | 11 |
| 8  | 814.95         | 407.98          | <b>797.92</b>  | 399.46           | 796.93         | 398.97           | G    | <b>1160.26</b> | 580.63          | 1143.23        | <b>572.12</b>    | 1142.25        | <b>571.63</b>    | 10 |
| 9  | <b>944.06</b>  | 472.54          | 927.03         | 464.02           | 926.05         | 463.53           | E    | <b>1103.21</b> | 552.11          | 1086.18        | 543.59           | 1085.19        | 543.10           | 9  |
| 10 | <b>1015.14</b> | 508.07          | 998.11         | 499.56           | 997.12         | 499.07           | A    | 974.10         | 487.55          | 957.07         | 479.04           |                |                  | 8  |
| 11 | <b>1118.28</b> | 559.65          | <b>1101.25</b> | 551.13           | 1100.27        | 550.64           | C    | <b>903.02</b>  | 452.01          | 885.99         | <b>443.50</b>    |                |                  | 7  |
| 12 | <b>1232.39</b> | 616.70          | 1215.36        | 608.18           | 1214.37        | <b>607.69</b>    | N    | <b>799.88</b>  | 400.44          | 782.84         | 391.93           |                |                  | 6  |
| 13 | 1329.50        | 665.25          | 1312.47        | 656.74           | 1311.49        | 656.25           | P    | <b>685.77</b>  | <b>343.39</b>   | 668.74         | 334.88           |                |                  | 5  |
| 14 | <b>1443.60</b> | 722.31          | 1426.57        | 713.79           | 1425.59        | 713.30           | N    | <b>588.66</b>  | 294.83          | <b>571.63</b>  | 286.32           |                |                  | 4  |
| 15 | <b>1514.68</b> | <b>757.84</b>   | 1497.65        | 749.33           | 1496.67        | 748.84           | A    | <b>474.56</b>  | 237.78          | 457.52         | 229.27           |                |                  | 3  |
| 16 | <b>1742.95</b> | 871.98          | 1725.92        | 863.46           | 1724.93        | 862.97           | C    | <b>403.48</b>  | 202.24          | 386.45         | 193.73           |                |                  | 2  |
| 17 |                |                 |                |                  |                |                  | R    | 175.21         | 88.11           | 158.18         | 79.59            |                |                  | 1  |

Gene Symbol  
FLNB

Sequences  
SPFVVQVG**E**ACNP**N**AC**R**

m/z  
959.17

Charge  
2+

Ion score  
130.1

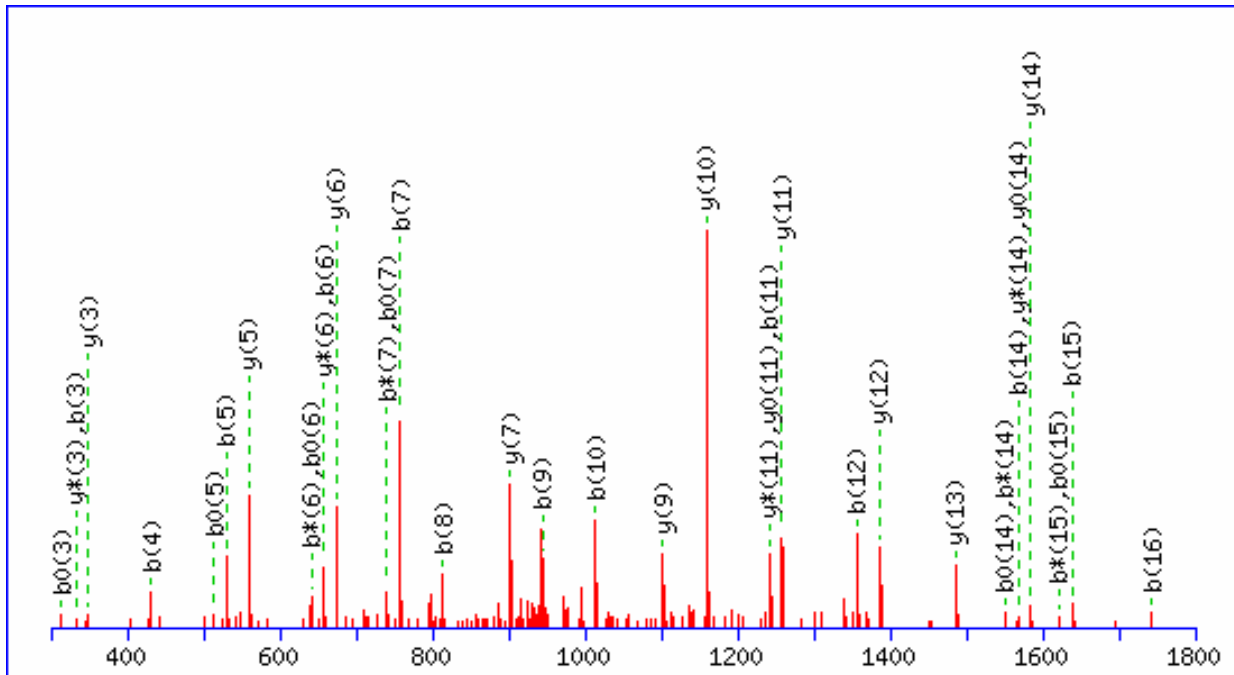

**C11** : NEM (C)

| #  | b              | b <sup>++</sup> | b <sup>*</sup> | b <sup>*++</sup> | b <sup>0</sup> | b <sup>0++</sup> | Seq. | y              | y <sup>++</sup> | y <sup>*</sup> | y <sup>*++</sup> | y <sup>0</sup> | y <sup>0++</sup> | #  |
|----|----------------|-----------------|----------------|------------------|----------------|------------------|------|----------------|-----------------|----------------|------------------|----------------|------------------|----|
| 1  | 88.09          | 44.55           |                |                  | 70.07          | 35.54            | S    |                |                 |                |                  |                |                  | 17 |
| 2  | 185.20         | 93.10           |                |                  | 167.19         | 84.10            | P    | 1830.07        | 915.54          | 1813.04        | 907.03           | 1812.06        | 906.53           | 16 |
| 3  | <b>332.37</b>  | 166.69          |                |                  | <b>314.36</b>  | 157.68           | F    | 1732.96        | 866.98          | 1715.93        | 858.47           | 1714.94        | 857.98           | 15 |
| 4  | <b>431.51</b>  | 216.26          |                |                  | 413.49         | 207.25           | V    | <b>1585.78</b> | 793.40          | <b>1568.75</b> | 784.88           | <b>1567.77</b> | 784.39           | 14 |
| 5  | <b>530.64</b>  | 265.82          |                |                  | <b>512.62</b>  | 256.81           | V    | <b>1486.65</b> | 743.83          | 1469.62        | 735.32           | 1468.64        | 734.82           | 13 |
| 6  | <b>658.77</b>  | 329.89          | <b>641.74</b>  | 321.37           | <b>640.75</b>  | 320.88           | Q    | <b>1387.52</b> | 694.26          | 1370.49        | 685.75           | 1369.51        | 685.26           | 12 |
| 7  | <b>757.90</b>  | 379.45          | <b>740.87</b>  | 370.94           | <b>739.88</b>  | 370.44           | V    | <b>1259.39</b> | 630.20          | <b>1242.36</b> | 621.69           | <b>1241.38</b> | 621.19           | 11 |
| 8  | <b>814.95</b>  | 407.98          | 797.92         | 399.46           | 796.93         | 398.97           | G    | <b>1160.26</b> | 580.63          | 1143.23        | 572.12           | 1142.25        | 571.63           | 10 |
| 9  | <b>944.06</b>  | 472.54          | 927.03         | 464.02           | 926.05         | 463.53           | E    | <b>1103.21</b> | 552.11          | 1086.18        | 543.59           | 1085.19        | 543.10           | 9  |
| 10 | <b>1015.14</b> | 508.07          | 998.11         | 499.56           | 997.12         | 499.07           | A    | 974.10         | 487.55          | 957.07         | 479.04           |                |                  | 8  |
| 11 | <b>1243.41</b> | 622.21          | 1226.38        | 613.69           | 1225.39        | 613.20           | C    | <b>903.02</b>  | 452.01          | 885.99         | 443.50           |                |                  | 7  |
| 12 | <b>1357.51</b> | 679.26          | 1340.48        | 670.74           | 1339.50        | 670.25           | N    | <b>674.75</b>  | 337.88          | <b>657.72</b>  | 329.36           |                |                  | 6  |
| 13 | 1454.63        | 727.82          | 1437.60        | 719.30           | 1436.61        | 718.81           | P    | <b>560.65</b>  | 280.83          | 543.62         | 272.31           |                |                  | 5  |
| 14 | <b>1568.73</b> | 784.87          | <b>1551.70</b> | 776.35           | <b>1550.71</b> | 775.86           | N    | 463.53         | 232.27          | 446.50         | 223.75           |                |                  | 4  |
| 15 | <b>1639.81</b> | 820.41          | <b>1622.78</b> | 811.89           | <b>1621.79</b> | 811.40           | A    | <b>349.43</b>  | 175.22          | <b>332.40</b>  | 166.70           |                |                  | 3  |
| 16 | <b>1742.95</b> | 871.98          | 1725.92        | 863.46           | 1724.93        | 862.97           | C    | 278.35         | 139.68          | 261.32         | 131.16           |                |                  | 2  |
| 17 |                |                 |                |                  |                |                  | R    | 175.21         | 88.11           | 158.18         | 79.59            |                |                  | 1  |

Gene Symbol: FLNB Sequences: SSFLVDCSKAGSNMLLIGVHGPTTPCEEVSMK m/z: 1155.31 Charge: 3+ Ion score: 103.0

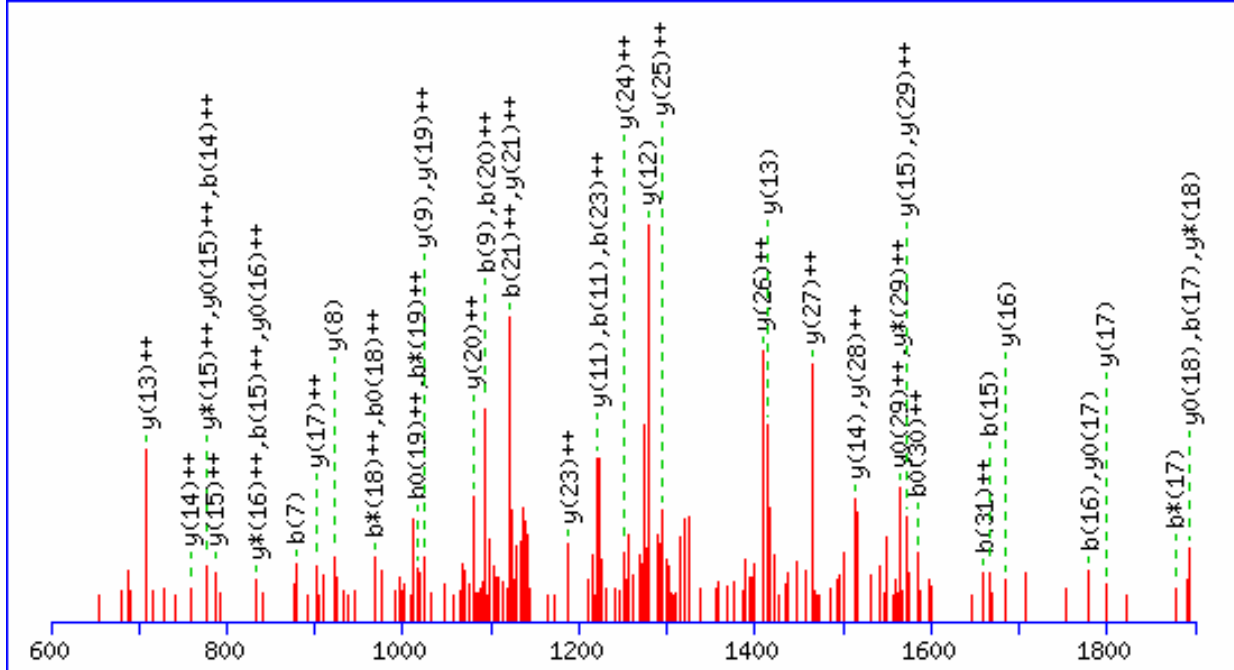

C7 : NEM (C)

| #  | b              | b <sup>+</sup> | b <sup>+</sup> | b <sup>++</sup> | b <sup>0</sup> | b <sup>0+</sup> | Seq. | y              | y <sup>++</sup> | y <sup>+</sup> | y <sup>+++</sup> | y <sup>0</sup> | y <sup>0+</sup> | #  |
|----|----------------|----------------|----------------|-----------------|----------------|-----------------|------|----------------|-----------------|----------------|------------------|----------------|-----------------|----|
| 1  | 88.09          | 44.55          |                |                 | 70.07          | 35.54           | S    |                |                 |                |                  |                |                 | 32 |
| 2  | 175.16         | 88.09          |                |                 | 157.15         | 79.08           | S    | 3377.91        | 1689.46         | 3360.87        | 1680.94          | 3359.89        | 1680.45         | 31 |
| 3  | 322.34         | 161.67         |                |                 | 304.32         | 152.66          | F    | 3290.83        | 1645.92         | 3273.80        | 1637.40          | 3272.81        | 1636.91         | 30 |
| 4  | 435.49         | 218.25         |                |                 | 417.48         | 209.24          | L    | 3143.65        | <b>1572.33</b>  | 3126.62        | <b>1563.82</b>   | 3125.64        | <b>1563.32</b>  | 29 |
| 5  | 534.63         | 267.82         |                |                 | 516.61         | 258.81          | V    | 3030.50        | <b>1515.75</b>  | 3013.47        | 1507.24          | 3012.48        | 1506.74         | 28 |
| 6  | 649.71         | 325.36         |                |                 | 631.70         | 316.35          | D    | 2931.37        | <b>1466.19</b>  | 2914.33        | 1457.67          | 2913.35        | 1457.18         | 27 |
| 7  | <b>877.98</b>  | 439.49         |                |                 | 859.97         | 430.49          | C    | 2816.28        | <b>1408.64</b>  | 2799.25        | 1400.13          | 2798.26        | 1399.64         | 26 |
| 8  | 965.06         | 483.03         |                |                 | 947.04         | 474.03          | S    | 2588.01        | <b>1294.51</b>  | 2570.98        | 1285.99          | 2569.99        | 1285.50         | 25 |
| 9  | <b>1093.23</b> | 547.12         | 1076.20        | 538.60          | 1075.22        | 538.11          | K    | 2500.93        | <b>1250.97</b>  | 2483.90        | 1242.45          | 2482.92        | 1241.96         | 24 |
| 10 | 1164.31        | 582.66         | 1147.28        | 574.14          | 1146.29        | 573.65          | A    | 2372.76        | <b>1186.88</b>  | 2355.73        | 1178.37          | 2354.74        | 1177.88         | 23 |
| 11 | <b>1221.36</b> | 611.18         | 1204.33        | 602.67          | 1203.34        | 602.18          | C    | 2301.68        | 1151.35         | 2284.65        | 1142.83          | 2283.67        | 1142.34         | 22 |
| 12 | 1308.44        | 654.72         | 1291.41        | 646.21          | 1290.42        | 645.71          | S    | 2244.63        | <b>1122.82</b>  | 2227.60        | 1114.30          | 2226.62        | 1113.81         | 21 |
| 13 | 1422.54        | 711.77         | 1405.51        | 703.26          | 1404.52        | 702.77          | N    | 2157.55        | <b>1079.28</b>  | 2140.52        | 1070.77          | 2139.54        | 1070.27         | 20 |
| 14 | 1553.74        | <b>777.37</b>  | 1536.71        | 768.86          | 1535.72        | 768.36          | M    | 2043.45        | <b>1022.23</b>  | 2026.42        | 1013.71          | 2025.44        | 1013.22         | 19 |
| 15 | <b>1666.89</b> | <b>833.95</b>  | 1649.86        | 825.44          | 1648.88        | 824.94          | L    | 1912.25        | 956.63          | <b>1895.22</b> | 948.12           | <b>1894.24</b> | 947.62          | 18 |
| 16 | <b>1780.05</b> | 890.53         | 1763.02        | 882.01          | 1762.04        | 881.52          | L    | <b>1799.10</b> | <b>900.05</b>   | 1782.07        | 891.54           | <b>1781.08</b> | 891.04          | 17 |
| 17 | <b>1893.21</b> | 947.11         | <b>1876.18</b> | 938.59          | 1875.19        | 938.10          | I    | <b>1685.94</b> | 843.47          | 1668.91        | <b>834.96</b>    | 1667.92        | <b>834.47</b>   | 16 |
| 18 | 1950.26        | 975.63         | 1933.23        | <b>967.12</b>   | 1932.24        | <b>966.63</b>   | G    | <b>1572.78</b> | <b>786.90</b>   | 1555.75        | <b>778.38</b>    | 1554.77        | <b>777.89</b>   | 15 |
| 19 | 2049.39        | 1025.20        | 2032.36        | <b>1016.68</b>  | 2031.38        | <b>1016.19</b>  | V    | <b>1515.73</b> | <b>758.37</b>   | 1498.70        | 749.85           | 1497.72        | 749.36          | 14 |
| 20 | 2186.53        | <b>1093.77</b> | 2169.50        | 1085.25         | 2168.51        | 1084.76         | H    | <b>1416.60</b> | <b>708.80</b>   | 1399.57        | 700.29           | 1398.58        | 699.80          | 13 |
| 21 | 2243.58        | <b>1122.29</b> | 2226.55        | 1113.78         | 2225.57        | 1113.29         | C    | <b>1279.46</b> | 640.23          | 1262.43        | 631.72           | 1261.45        | 631.23          | 12 |
| 22 | 2340.70        | 1170.85        | 2323.67        | 1162.34         | 2322.68        | 1161.84         | P    | <b>1222.41</b> | 611.71          | 1205.38        | 603.19           | 1204.39        | 602.70          | 11 |
| 23 | 2441.80        | <b>1221.40</b> | 2424.77        | 1212.89         | 2423.79        | 1212.40         | T    | 1125.29        | 563.15          | 1108.26        | 554.64           | 1107.28        | 554.14          | 10 |
| 24 | 2542.90        | 1271.96        | 2525.87        | 1263.44         | 2524.89        | 1262.95         | T    | <b>1024.19</b> | 512.60          | 1007.16        | 504.08           | 1006.17        | 503.59          | 9  |
| 25 | 2640.02        | 1320.51        | 2622.99        | 1312.00         | 2622.00        | 1311.51         | P    | <b>923.09</b>  | 462.05          | 906.06         | 453.53           | 905.07         | 453.04          | 8  |
| 26 | 2743.16        | 1372.09        | 2726.13        | 1363.57         | 2725.15        | 1363.08         | C    | 825.97         | 413.49          | 808.94         | 404.97           | 807.96         | 404.48          | 7  |
| 27 | 2872.28        | 1436.64        | 2855.25        | 1428.13         | 2854.26        | 1427.63         | E    | 722.83         | 361.92          | 705.80         | 353.40           | 704.81         | 352.91          | 6  |
| 28 | 3001.39        | 1501.20        | 2984.36        | 1492.68         | 2983.38        | 1492.19         | E    | 593.71         | 297.36          | 576.68         | 288.85           | 575.70         | 288.35          | 5  |
| 29 | 3100.52        | 1550.76        | 3083.49        | 1542.25         | 3082.51        | 1541.76         | V    | 464.60         | 232.80          | 447.57         | 224.29           | 446.58         | 223.80          | 4  |
| 30 | 3187.60        | 1594.30        | 3170.57        | 1585.79         | 3169.58        | <b>1585.30</b>  | S    | 365.47         | 183.24          | 348.44         | 174.72           | 347.45         | 174.23          | 3  |
| 31 | 3318.79        | <b>1659.90</b> | 3301.76        | 1651.39         | 3300.78        | 1650.89         | M    | 278.39         | 139.70          | 261.36         | 131.18           |                |                 | 2  |
| 32 |                |                |                |                 |                |                 | K    | 147.20         | 74.10           | 130.17         | 65.59            |                |                 | 1  |

Gene Symbol  
FLNB

Sequences  
VAVTEG**C**QPSR

m/z  
573.84

Charge  
2+

Ion score  
53.0

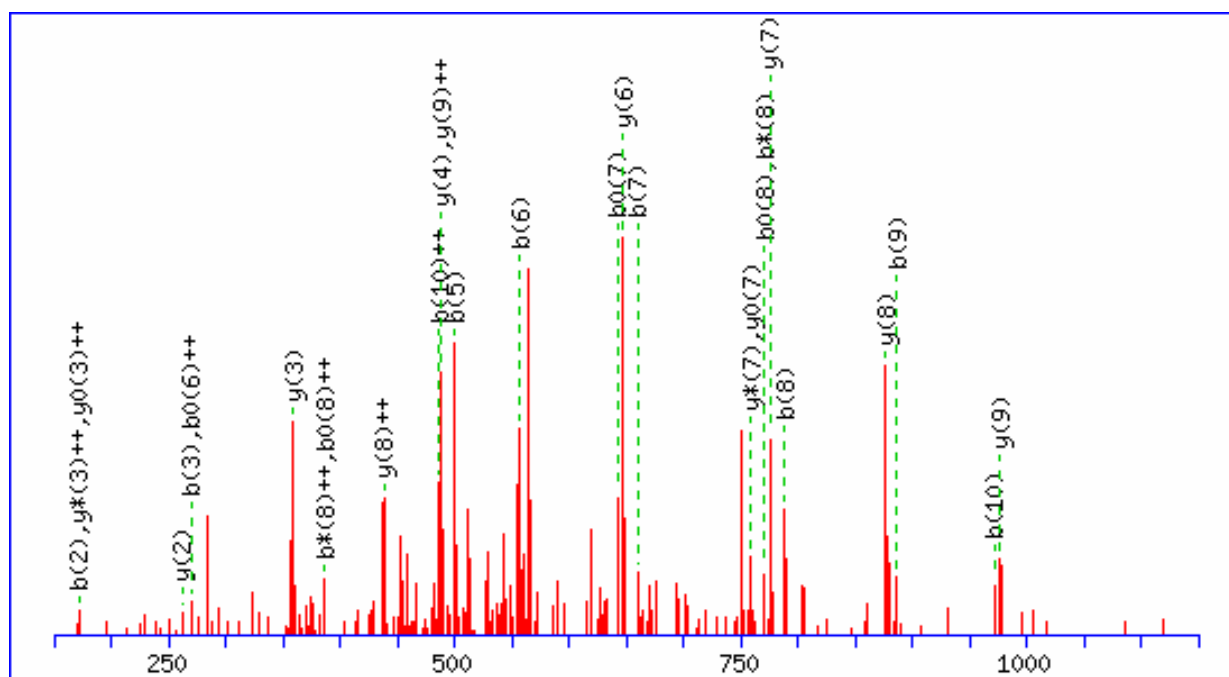

| #  | b      | b <sup>++</sup> | b <sup>*</sup> | b <sup>*++</sup> | b <sup>0</sup> | b <sup>0++</sup> | Seq. | y       | y <sup>++</sup> | y <sup>*</sup> | y <sup>*++</sup> | y <sup>0</sup> | y <sup>0++</sup> | #  |
|----|--------|-----------------|----------------|------------------|----------------|------------------|------|---------|-----------------|----------------|------------------|----------------|------------------|----|
| 1  | 100.14 | 50.57           |                |                  |                |                  | V    |         |                 |                |                  |                |                  | 11 |
| 2  | 171.22 | 86.11           |                |                  |                |                  | A    | 1048.15 | 524.58          | 1031.12        | 516.06           | 1030.14        | 515.57           | 10 |
| 3  | 270.35 | 135.68          |                |                  |                |                  | V    | 977.07  | 489.04          | 960.04         | 480.53           | 959.06         | 480.03           | 9  |
| 4  | 371.45 | 186.23          |                |                  | 353.44         | 177.22           | T    | 877.94  | 439.48          | 860.91         | 430.96           | 859.93         | 430.47           | 8  |
| 5  | 500.57 | 250.79          |                |                  | 482.55         | 241.78           | E    | 776.84  | 388.92          | 759.81         | 380.41           | 758.82         | 379.92           | 7  |
| 6  | 557.62 | 279.31          |                |                  | 539.60         | 270.30           | G    | 647.72  | 324.37          | 630.69         | 315.85           | 629.71         | 315.36           | 6  |
| 7  | 660.76 | 330.88          |                |                  | 642.74         | 321.88           | C    | 590.67  | 295.84          | 573.64         | 287.33           | 572.66         | 286.83           | 5  |
| 8  | 788.89 | 394.95          | 771.86         | 386.43           | 770.87         | 385.94           | Q    | 487.53  | 244.27          | 470.50         | 235.75           | 469.52         | 235.26           | 4  |
| 9  | 886.00 | 443.51          | 868.97         | 434.99           | 867.99         | 434.50           | P    | 359.40  | 180.20          | 342.37         | 171.69           | 341.39         | 171.20           | 3  |
| 10 | 973.08 | 487.04          | 956.05         | 478.53           | 955.07         | 478.04           | S    | 262.29  | 131.65          | 245.26         | 123.13           | 244.27         | 122.64           | 2  |
| 11 |        |                 |                |                  |                |                  | R    | 175.21  | 88.11           | 158.18         | 79.59            |                |                  | 1  |

Gene Symbol  
FLNB

Sequences  
VVPCLVTPVTGR

m/z  
620.58

Charge  
2+

Ion score  
52.7

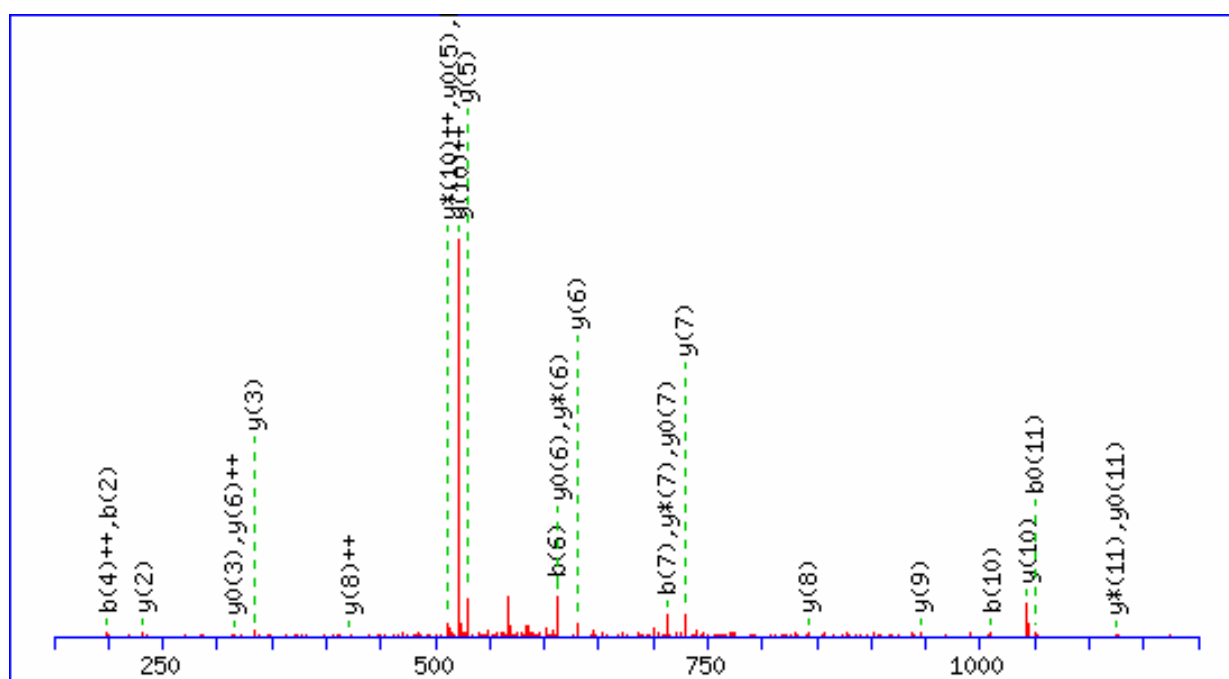

| #  | b              | b <sup>++</sup> | b <sup>0</sup> | b <sup>0++</sup> | Seq. | y              | y <sup>++</sup> | y <sup>*</sup> | y <sup>+++</sup> | y <sup>0</sup> | y <sup>0++</sup> | #  |
|----|----------------|-----------------|----------------|------------------|------|----------------|-----------------|----------------|------------------|----------------|------------------|----|
| 1  | 100.14         | 50.57           |                |                  | V    |                |                 |                |                  |                |                  | 12 |
| 2  | <b>199.27</b>  | 100.14          |                |                  | V    | 1142.39        | 571.70          | <b>1125.36</b> | 563.18           | <b>1124.38</b> | 562.69           | 11 |
| 3  | 296.39         | 148.70          |                |                  | P    | <b>1043.26</b> | <b>522.13</b>   | 1026.23        | <b>513.62</b>    | 1025.25        | <b>513.13</b>    | 10 |
| 4  | 399.53         | <b>200.27</b>   |                |                  | C    | <b>946.15</b>  | 473.58          | 929.12         | 465.06           | 928.13         | 464.57           | 9  |
| 5  | <b>512.69</b>  | 256.85          |                |                  | L    | <b>843.00</b>  | <b>422.01</b>   | 825.97         | 413.49           | 824.99         | 413.00           | 8  |
| 6  | <b>611.82</b>  | 306.41          |                |                  | V    | <b>729.85</b>  | 365.43          | <b>712.81</b>  | 356.91           | <b>711.83</b>  | 356.42           | 7  |
| 7  | <b>712.92</b>  | 356.96          | 694.91         | 347.96           | T    | <b>630.71</b>  | <b>315.86</b>   | <b>613.68</b>  | 307.35           | <b>612.70</b>  | 306.85           | 6  |
| 8  | 810.04         | 405.52          | 792.02         | 396.51           | P    | <b>529.61</b>  | 265.31          | <b>512.58</b>  | 256.79           | <b>511.60</b>  | 256.30           | 5  |
| 9  | 909.17         | 455.09          | 891.15         | 446.08           | V    | 432.50         | 216.75          | 415.46         | 208.24           | 414.48         | 207.74           | 4  |
| 10 | <b>1010.27</b> | 505.64          | 992.26         | 496.63           | T    | <b>333.36</b>  | 167.19          | 316.33         | 158.67           | <b>315.35</b>  | 158.18           | 3  |
| 11 | 1067.32        | 534.17          | <b>1049.31</b> | 525.16           | G    | <b>232.26</b>  | 116.63          | 215.23         | 108.12           |                |                  | 2  |
| 12 |                |                 |                |                  | R    | 175.21         | 88.11           | 158.18         | 79.59            |                |                  | 1  |

Gene Symbol  
FLOT1

Sequences  
MFFTCGPNEAMVVS**G**FCR

m/z  
1069.18

Charge  
2+

Ion score  
121.7

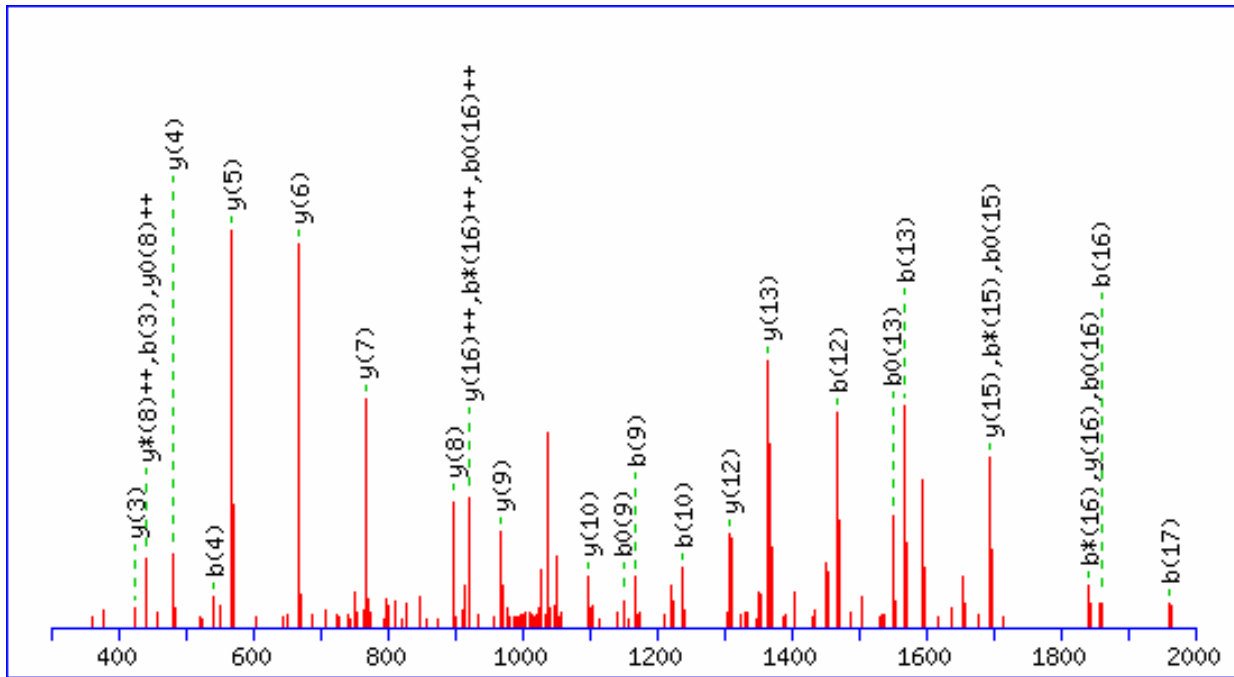

**M1** : Oxidation (M)

**C5** : NEM (C)

| #  | b              | b <sup>++</sup> | b <sup>*</sup> | b <sup>*++</sup> | b <sup>0</sup> | b <sup>0++</sup> | Seq.     | y              | y <sup>++</sup> | y <sup>*</sup> | y <sup>*++</sup> | y <sup>0</sup> | y <sup>0++</sup> | #  |
|----|----------------|-----------------|----------------|------------------|----------------|------------------|----------|----------------|-----------------|----------------|------------------|----------------|------------------|----|
| 1  | 148.20         | 74.61           |                |                  |                |                  | <b>M</b> |                |                 |                |                  |                |                  | 18 |
| 2  | 295.38         | 148.19          |                |                  |                |                  | <b>F</b> | 1991.29        | 996.15          | 1974.26        | 987.64           | 1973.28        | 987.14           | 17 |
| 3  | <b>442.55</b>  | 221.78          |                |                  |                |                  | <b>F</b> | <b>1844.12</b> | <b>922.56</b>   | 1827.09        | 914.05           | 1826.10        | 913.56           | 16 |
| 4  | <b>543.66</b>  | 272.33          |                |                  | 525.64         | 263.32           | <b>T</b> | <b>1696.95</b> | 848.98          | 1679.92        | 840.46           | 1678.93        | 839.97           | 15 |
| 5  | 771.92         | 386.47          |                |                  | 753.91         | 377.46           | <b>C</b> | 1595.84        | 798.42          | 1578.81        | 789.91           | 1577.83        | 789.42           | 14 |
| 6  | 828.97         | 414.99          |                |                  | 810.96         | 405.98           | <b>G</b> | <b>1367.57</b> | 684.29          | 1350.54        | 675.78           | 1349.56        | 675.28           | 13 |
| 7  | 926.09         | 463.55          |                |                  | 908.07         | 454.54           | <b>P</b> | <b>1310.52</b> | 655.77          | 1293.49        | 647.25           | 1292.51        | 646.76           | 12 |
| 8  | 1040.19        | 520.60          | 1023.16        | 512.08           | 1022.18        | 511.59           | <b>N</b> | 1213.41        | 607.21          | 1196.38        | 598.69           | 1195.39        | 598.20           | 11 |
| 9  | <b>1169.31</b> | 585.16          | 1152.28        | 576.64           | <b>1151.29</b> | 576.15           | <b>E</b> | <b>1099.30</b> | 550.16          | 1082.27        | 541.64           | 1081.29        | 541.15           | 10 |
| 10 | <b>1240.38</b> | 620.70          | 1223.35        | 612.18           | 1222.37        | 611.69           | <b>A</b> | <b>970.19</b>  | 485.60          | 953.16         | 477.08           | 952.18         | 476.59           | 9  |
| 11 | 1371.58        | 686.29          | 1354.55        | 677.78           | 1353.57        | 677.29           | <b>M</b> | <b>899.11</b>  | 450.06          | 882.08         | <b>441.55</b>    | 881.10         | <b>441.05</b>    | 8  |
| 12 | <b>1470.71</b> | 735.86          | 1453.68        | 727.34           | 1452.70        | 726.85           | <b>V</b> | <b>767.92</b>  | 384.46          | 750.89         | 375.95           | 749.90         | 375.45           | 7  |
| 13 | <b>1569.84</b> | 785.43          | 1552.81        | 776.91           | <b>1551.83</b> | 776.42           | <b>V</b> | <b>668.79</b>  | 334.90          | 651.75         | 326.38           | 650.77         | 325.89           | 6  |
| 14 | 1656.92        | 828.96          | 1639.89        | 820.45           | 1638.90        | 819.96           | <b>S</b> | <b>569.65</b>  | 285.33          | 552.62         | 276.82           | 551.64         | 276.32           | 5  |
| 15 | 1713.97        | 857.49          | <b>1696.94</b> | 848.97           | <b>1695.96</b> | 848.48           | <b>G</b> | <b>482.58</b>  | 241.79          | 465.55         | 233.28           |                |                  | 4  |
| 16 | <b>1861.15</b> | 931.08          | <b>1844.11</b> | <b>922.56</b>    | <b>1843.13</b> | <b>922.07</b>    | <b>F</b> | <b>425.53</b>  | 213.27          | 408.50         | 204.75           |                |                  | 3  |
| 17 | <b>1964.29</b> | 982.65          | 1947.26        | 974.13           | 1946.27        | 973.64           | <b>C</b> | 278.35         | 139.68          | 261.32         | 131.16           |                |                  | 2  |
| 18 |                |                 |                |                  |                |                  | <b>R</b> | 175.21         | 88.11           | 158.18         | 79.59            |                |                  | 1  |

Gene Symbol  
FLOT1

Sequences  
MFFTCGPNEAMVVS~~G~~FCR

m/z  
998.67

Charge  
2+

Ion score  
131.0

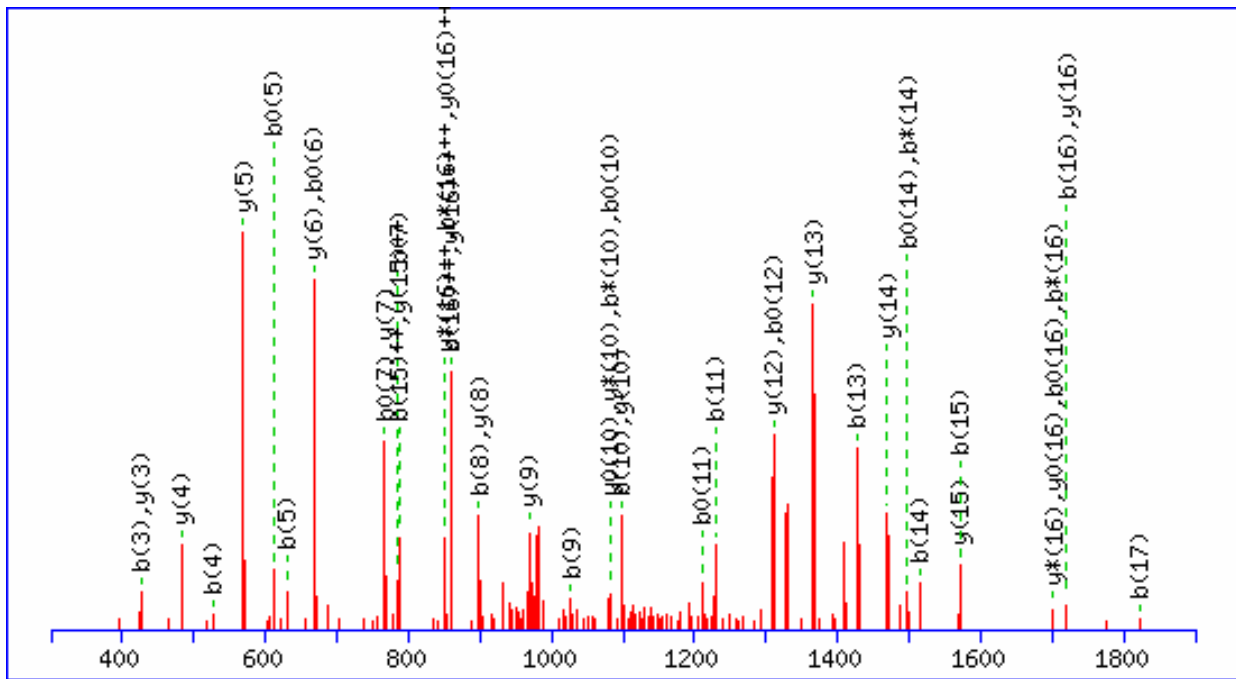

| #  | b              | b <sup>++</sup> | b <sup>*</sup> | b <sup>***</sup> | b <sup>0</sup> | b <sup>0++</sup> | Seq. | y              | y <sup>++</sup> | y <sup>*</sup> | y <sup>***</sup> | y <sup>0</sup> | y <sup>0++</sup> | #  |
|----|----------------|-----------------|----------------|------------------|----------------|------------------|------|----------------|-----------------|----------------|------------------|----------------|------------------|----|
| 1  | 132.20         | 66.61           |                |                  |                |                  | M    |                |                 |                |                  |                |                  | 18 |
| 2  | 279.38         | 140.19          |                |                  |                |                  | F    | 1866.17        | 933.59          | 1849.14        | 925.07           | 1848.15        | 924.58           | 17 |
| 3  | <b>426.55</b>  | 213.78          |                |                  |                |                  | F    | <b>1718.99</b> | <b>860.00</b>   | <b>1701.96</b> | <b>851.49</b>    | <b>1700.98</b> | <b>850.99</b>    | 16 |
| 4  | <b>527.66</b>  | 264.33          |                |                  | 509.64         | 255.32           | T    | <b>1571.82</b> | <b>786.41</b>   | 1554.79        | 777.90           | 1553.81        | 777.41           | 15 |
| 5  | <b>630.80</b>  | 315.90          |                |                  | <b>612.78</b>  | 306.90           | C    | <b>1470.72</b> | 735.86          | 1453.69        | 727.35           | 1452.70        | 726.85           | 14 |
| 6  | 687.85         | 344.43          |                |                  | <b>669.83</b>  | 335.42           | G    | <b>1367.57</b> | 684.29          | 1350.54        | 675.78           | 1349.56        | 675.28           | 13 |
| 7  | <b>784.97</b>  | 392.99          |                |                  | <b>766.95</b>  | 383.98           | P    | <b>1310.52</b> | 655.77          | 1293.49        | 647.25           | 1292.51        | 646.76           | 12 |
| 8  | <b>899.07</b>  | 450.04          | 882.04         | 441.52           | 881.05         | 441.03           | N    | 1213.41        | 607.21          | 1196.38        | 598.69           | 1195.39        | 598.20           | 11 |
| 9  | <b>1028.18</b> | 514.59          | 1011.15        | 506.08           | 1010.17        | 505.59           | E    | <b>1099.30</b> | 550.16          | <b>1082.27</b> | 541.64           | <b>1081.29</b> | 541.15           | 10 |
| 10 | <b>1099.26</b> | 550.13          | <b>1082.23</b> | 541.62           | <b>1081.24</b> | 541.13           | A    | <b>970.19</b>  | 485.60          | 953.16         | 477.08           | 952.18         | 476.59           | 9  |
| 11 | <b>1230.46</b> | 615.73          | 1213.43        | 607.22           | <b>1212.44</b> | 606.72           | M    | <b>899.11</b>  | 450.06          | 882.08         | 441.55           | 881.10         | 441.05           | 8  |
| 12 | 1329.59        | 665.30          | 1312.56        | 656.78           | <b>1311.57</b> | 656.29           | V    | <b>767.92</b>  | 384.46          | 750.89         | 375.95           | 749.90         | 375.45           | 7  |
| 13 | <b>1428.72</b> | 714.86          | 1411.69        | 706.35           | 1410.70        | 705.86           | V    | <b>668.79</b>  | 334.90          | 651.75         | 326.38           | 650.77         | 325.89           | 6  |
| 14 | <b>1515.80</b> | 758.40          | <b>1498.76</b> | 749.89           | <b>1497.78</b> | 749.39           | S    | <b>569.65</b>  | 285.33          | 552.62         | 276.82           | 551.64         | 276.32           | 5  |
| 15 | <b>1572.85</b> | <b>786.93</b>   | 1555.82        | 778.41           | 1554.83        | 777.92           | G    | <b>482.58</b>  | 241.79          | 465.55         | 233.28           |                |                  | 4  |
| 16 | <b>1720.02</b> | <b>860.51</b>   | <b>1702.99</b> | <b>852.00</b>    | <b>1702.01</b> | <b>851.51</b>    | F    | <b>425.53</b>  | 213.27          | 408.50         | 204.75           |                |                  | 3  |
| 17 | <b>1823.16</b> | 912.09          | 1806.13        | 903.57           | 1805.15        | 903.08           | C    | 278.35         | 139.68          | 261.32         | 131.16           |                |                  | 2  |
| 18 |                |                 |                |                  |                |                  | R    | 175.21         | 88.11           | 158.18         | 79.59            |                |                  | 1  |

Gene Symbol  
FLOT1

Sequences  
SPPVMVAGGRVFLVLP**CI**QQIQR

m/z  
799.37

Charge  
3+

Ion score  
123.2

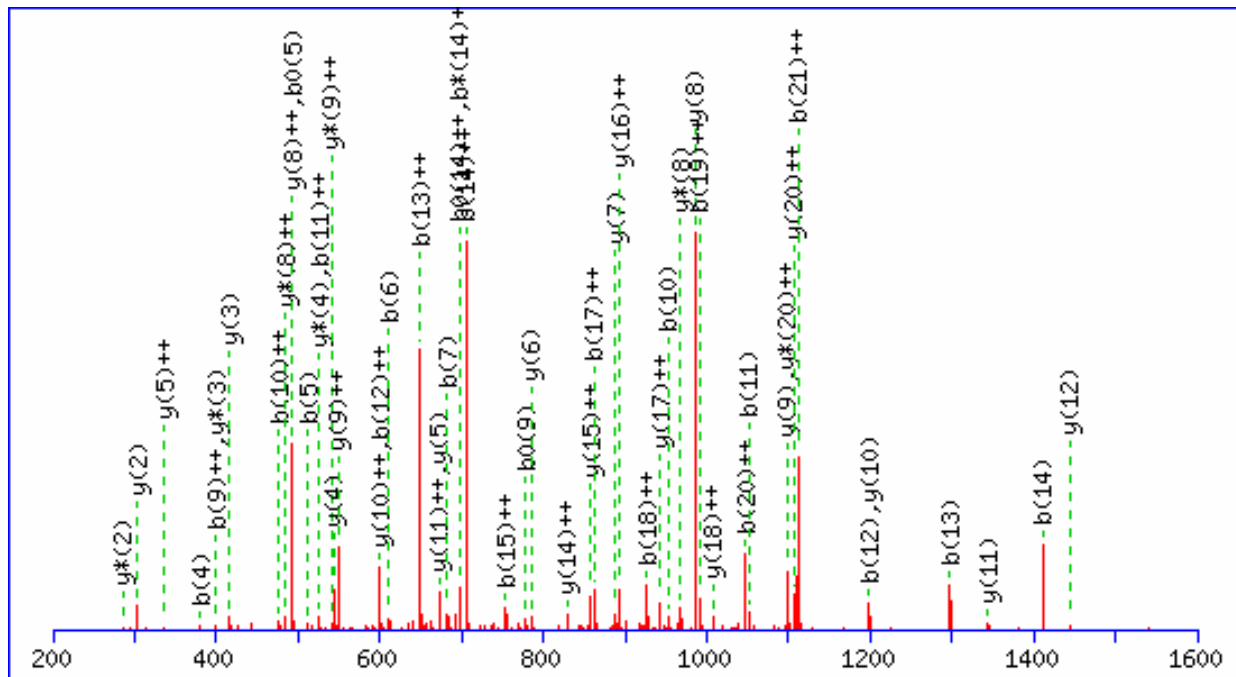

| #  | b              | b <sup>++</sup> | b <sup>*</sup> | b <sup>***</sup> | b <sup>0</sup> | b <sup>0++</sup> | Seq. | y              | y <sup>++</sup> | y <sup>*</sup> | y <sup>***</sup> | #  |
|----|----------------|-----------------|----------------|------------------|----------------|------------------|------|----------------|-----------------|----------------|------------------|----|
| 1  | 88.09          | 44.55           |                |                  | 70.07          | 35.54            | S    |                |                 |                |                  | 22 |
| 2  | 185.20         | 93.10           |                |                  | 167.19         | 84.10            | P    | 2309.82        | 1155.41         | 2292.79        | 1146.90          | 21 |
| 3  | 282.32         | 141.66          |                |                  | 264.30         | 132.65           | P    | 2212.70        | <b>1106.86</b>  | 2195.67        | <b>1098.34</b>   | 20 |
| 4  | <b>381.45</b>  | 191.23          |                |                  | 363.43         | 182.22           | V    | 2115.59        | 1058.30         | 2098.56        | 1049.78          | 19 |
| 5  | <b>512.64</b>  | 256.83          |                |                  | <b>494.63</b>  | 247.82           | M    | 2016.46        | <b>1008.73</b>  | 1999.43        | 1000.22          | 18 |
| 6  | <b>611.77</b>  | 306.39          |                |                  | 593.76         | 297.38           | V    | 1885.26        | <b>943.13</b>   | 1868.23        | 934.62           | 17 |
| 7  | <b>682.85</b>  | 341.93          |                |                  | 664.84         | 332.92           | A    | 1786.13        | <b>893.57</b>   | 1769.10        | 885.05           | 16 |
| 8  | 739.90         | 370.46          |                |                  | 721.89         | 361.45           | G    | 1715.05        | <b>858.03</b>   | 1698.02        | 849.51           | 15 |
| 9  | 796.95         | <b>398.98</b>   |                |                  | <b>778.94</b>  | 389.97           | G    | 1658.00        | <b>829.50</b>   | 1640.97        | 820.99           | 14 |
| 10 | <b>953.14</b>  | <b>477.07</b>   | 936.11         | 468.56           | 935.12         | 468.07           | R    | 1600.95        | 800.98          | 1583.92        | 792.46           | 13 |
| 11 | <b>1052.27</b> | <b>526.64</b>   | 1035.24        | 518.12           | 1034.26        | 517.63           | V    | <b>1444.76</b> | 722.89          | 1427.73        | 714.37           | 12 |
| 12 | <b>1199.45</b> | <b>600.23</b>   | 1182.41        | 591.71           | 1181.43        | 591.22           | F    | <b>1345.63</b> | <b>673.32</b>   | 1328.60        | 664.80           | 11 |
| 13 | <b>1298.58</b> | <b>649.79</b>   | 1281.55        | 641.28           | 1280.56        | 640.78           | V    | <b>1198.46</b> | <b>599.73</b>   | 1181.43        | 591.22           | 10 |
| 14 | <b>1411.73</b> | <b>706.37</b>   | 1394.70        | <b>697.86</b>    | 1393.72        | <b>697.36</b>    | L    | <b>1099.33</b> | <b>550.17</b>   | 1082.30        | <b>541.65</b>    | 9  |
| 15 | 1508.85        | <b>754.93</b>   | 1491.82        | 746.41           | 1490.83        | 745.92           | P    | <b>986.17</b>  | <b>493.59</b>   | <b>969.14</b>  | <b>485.07</b>    | 8  |
| 16 | 1611.99        | 806.50          | 1594.96        | 797.98           | 1593.98        | 797.49           | C    | <b>889.05</b>  | 445.03          | 872.02         | 436.52           | 7  |
| 17 | 1725.15        | <b>863.08</b>   | 1708.12        | 854.56           | 1707.13        | 854.07           | I    | <b>785.91</b>  | 393.46          | 768.88         | 384.94           | 6  |
| 18 | 1853.28        | <b>927.14</b>   | 1836.25        | 918.63           | 1835.26        | 918.14           | Q    | <b>672.75</b>  | <b>336.88</b>   | 655.72         | 328.37           | 5  |
| 19 | 1981.41        | <b>991.21</b>   | 1964.38        | 982.69           | 1963.39        | 982.20           | Q    | <b>544.62</b>  | 272.82          | <b>527.59</b>  | 264.30           | 4  |
| 20 | 2094.57        | <b>1047.79</b>  | 2077.54        | 1039.27          | 2076.55        | 1038.78          | I    | <b>416.50</b>  | 208.75          | <b>399.47</b>  | 200.24           | 3  |
| 21 | 2222.69        | <b>1111.85</b>  | 2205.66        | 1103.34          | 2204.68        | 1102.84          | Q    | <b>303.34</b>  | 152.17          | <b>286.31</b>  | 143.66           | 2  |
| 22 |                |                 |                |                  |                |                  | R    | 175.21         | 88.11           | 158.18         | 79.59            | 1  |



Gene Symbol  
G3BP1

Sequences  
VMSQNFTN**C**HTK

m/z  
705.59

Charge  
2+

Ion score  
47.5

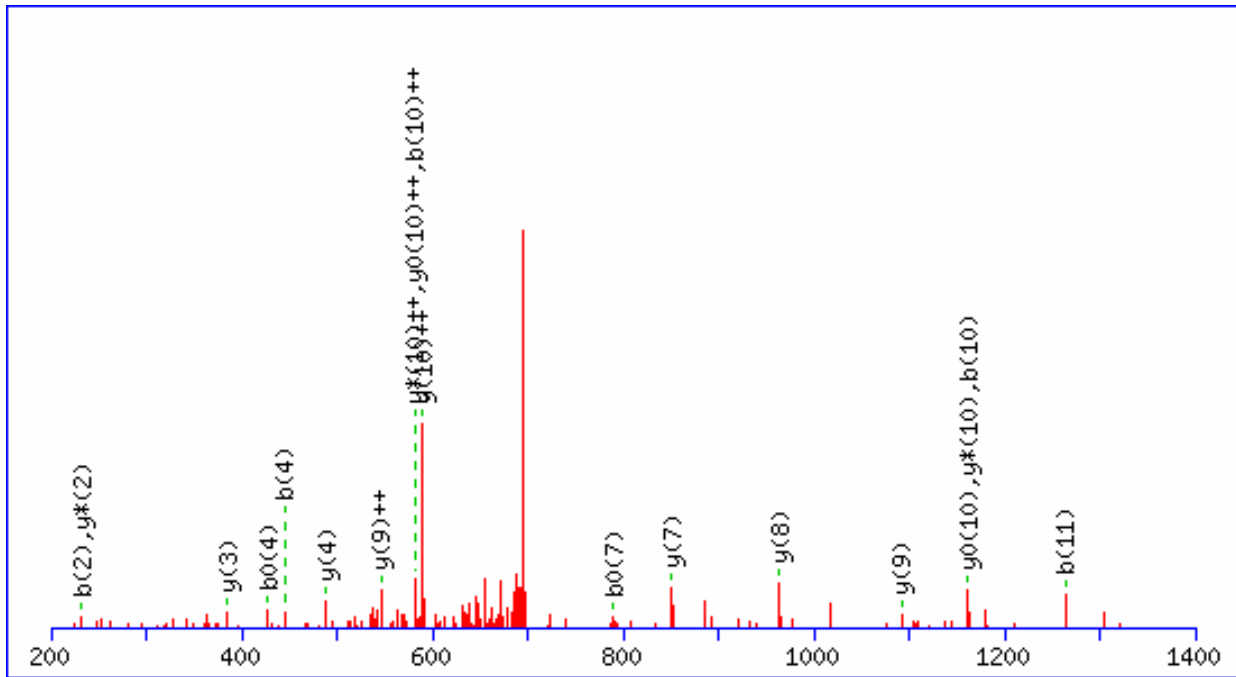

| #  | b              | b <sup>++</sup> | b <sup>*</sup> | b <sup>***</sup> | b <sup>0</sup> | b <sup>0++</sup> | Seq. | y              | y <sup>++</sup> | y <sup>*</sup> | y <sup>***</sup> | y <sup>0</sup> | y <sup>0++</sup> | #  |
|----|----------------|-----------------|----------------|------------------|----------------|------------------|------|----------------|-----------------|----------------|------------------|----------------|------------------|----|
| 1  | 100.14         | 50.57           |                |                  |                |                  | V    |                |                 |                |                  |                |                  | 12 |
| 2  | <b>231.34</b>  | 116.17          |                |                  |                |                  | M    | 1311.47        | 656.24          | 1294.44        | 647.72           | 1293.45        | 647.23           | 11 |
| 3  | 318.41         | 159.71          |                |                  | 300.40         | 150.70           | S    | 1180.27        | <b>590.64</b>   | <b>1163.24</b> | <b>582.12</b>    | <b>1162.26</b> | <b>581.63</b>    | 10 |
| 4  | <b>446.54</b>  | 223.77          | 429.51         | 215.26           | <b>428.53</b>  | 214.77           | Q    | <b>1093.19</b> | <b>547.10</b>   | 1076.16        | 538.59           | 1075.18        | 538.09           | 9  |
| 5  | 560.64         | 280.83          | 543.61         | 272.31           | 542.63         | 271.82           | N    | <b>965.06</b>  | 483.04          | 948.03         | 474.52           | 947.05         | 474.03           | 8  |
| 6  | 707.82         | 354.41          | 690.79         | 345.90           | 689.80         | 345.41           | F    | <b>850.96</b>  | 425.98          | 833.93         | 417.47           | 832.95         | 416.98           | 7  |
| 7  | 808.92         | 404.96          | 791.89         | 396.45           | <b>790.91</b>  | 395.96           | T    | 703.79         | 352.40          | 686.76         | 343.88           | 685.77         | 343.39           | 6  |
| 8  | 923.02         | 462.02          | 905.99         | 453.50           | 905.01         | 453.01           | N    | 602.68         | 301.85          | 585.65         | 293.33           | 584.67         | 292.84           | 5  |
| 9  | 1026.17        | 513.59          | 1009.14        | 505.07           | 1008.15        | 504.58           | C    | <b>488.58</b>  | 244.79          | 471.55         | 236.28           | 470.57         | 235.79           | 4  |
| 10 | <b>1163.31</b> | <b>582.16</b>   | 1146.28        | 573.64           | 1145.29        | 573.15           | H    | <b>385.44</b>  | 193.22          | 368.41         | 184.71           | 367.42         | 184.22           | 3  |
| 11 | <b>1264.41</b> | 632.71          | 1247.38        | 624.19           | 1246.40        | 623.70           | T    | 248.30         | 124.65          | <b>231.27</b>  | 116.14           | 230.28         | 115.65           | 2  |
| 12 |                |                 |                |                  |                |                  | K    | 147.20         | 74.10           | 130.16         | 65.59            |                |                  | 1  |

Gene Symbol  
G6PC3

Sequences  
DSGAALGLGIALHSP**C**YAQVR

m/z  
700.80

Charge  
3+

Ion score  
110.2

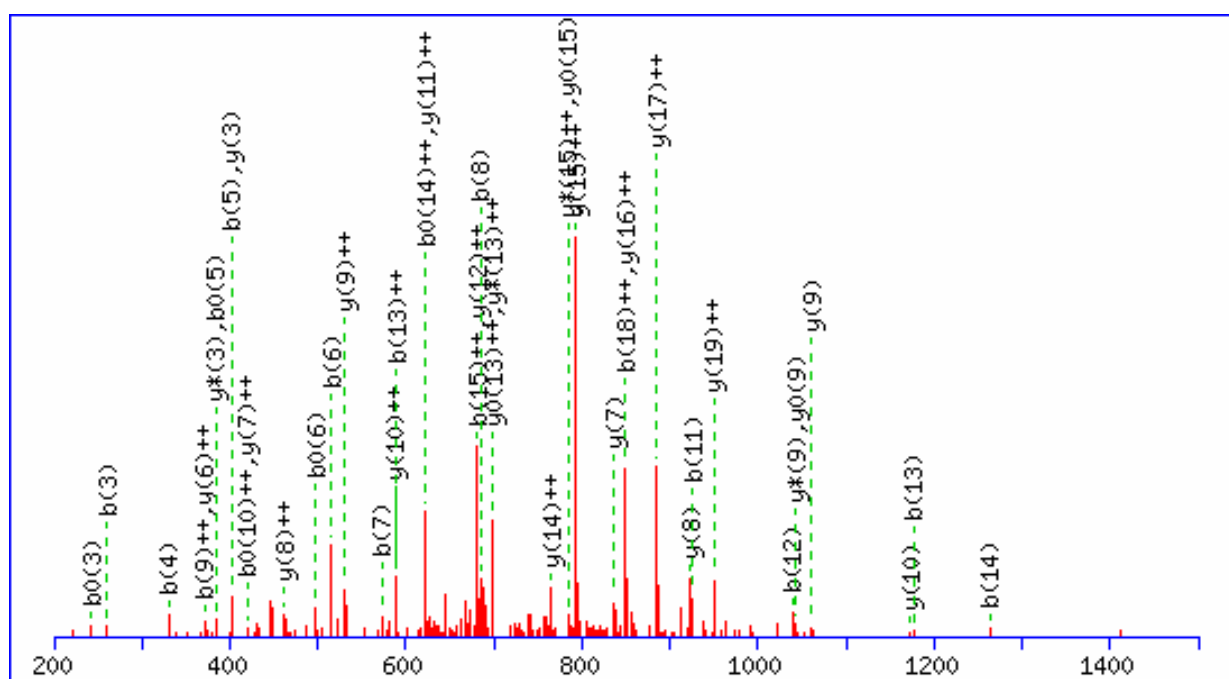

| #  | b              | b <sup>++</sup> | b <sup>*</sup> | b <sup>*++</sup> | b <sup>0</sup> | b <sup>0++</sup> | Seq. | y              | y <sup>++</sup> | y <sup>*</sup> | y <sup>*++</sup> | y <sup>0</sup> | y <sup>0++</sup> | #  |
|----|----------------|-----------------|----------------|------------------|----------------|------------------|------|----------------|-----------------|----------------|------------------|----------------|------------------|----|
| 1  | 116.10         | 58.55           |                |                  | 98.08          | 49.54            | D    |                |                 |                |                  |                |                  | 21 |
| 2  | 203.17         | 102.09          |                |                  | 185.16         | 93.08            | S    | 1985.29        | 993.15          | 1968.26        | 984.63           | 1967.28        | 984.14           | 20 |
| 3  | <b>260.22</b>  | 130.62          |                |                  | <b>242.21</b>  | 121.61           | G    | 1898.21        | <b>949.61</b>   | 1881.18        | 941.10           | 1880.20        | 940.60           | 19 |
| 4  | <b>331.30</b>  | 166.15          |                |                  | 313.29         | 157.15           | A    | 1841.16        | 921.08          | 1824.13        | 912.57           | 1823.15        | 912.08           | 18 |
| 5  | <b>402.38</b>  | 201.69          |                |                  | <b>384.36</b>  | 192.69           | A    | 1770.08        | <b>885.55</b>   | 1753.05        | 877.03           | 1752.07        | 876.54           | 17 |
| 6  | <b>515.54</b>  | 258.27          |                |                  | <b>497.52</b>  | 249.26           | L    | 1699.01        | <b>850.01</b>   | 1681.98        | 841.49           | 1680.99        | 841.00           | 16 |
| 7  | <b>572.59</b>  | 286.80          |                |                  | 554.57         | 277.79           | G    | 1585.85        | <b>793.43</b>   | 1568.82        | <b>784.91</b>    | 1567.83        | <b>784.42</b>    | 15 |
| 8  | <b>685.75</b>  | 343.38          |                |                  | 667.73         | 334.37           | L    | 1528.80        | <b>764.90</b>   | 1511.77        | 756.39           | 1510.78        | 755.89           | 14 |
| 9  | 742.80         | <b>371.90</b>   |                |                  | 724.78         | 362.90           | G    | 1415.64        | 708.32          | 1398.61        | <b>699.81</b>    | 1397.62        | <b>699.32</b>    | 13 |
| 10 | 855.96         | 428.48          |                |                  | 837.94         | <b>419.47</b>    | I    | 1358.59        | <b>679.80</b>   | 1341.56        | 671.28           | 1340.57        | 670.79           | 12 |
| 11 | <b>927.03</b>  | 464.02          |                |                  | 909.02         | 455.01           | A    | 1245.43        | <b>623.22</b>   | 1228.40        | 614.70           | 1227.42        | 614.21           | 11 |
| 12 | <b>1040.19</b> | 520.60          |                |                  | 1022.18        | 511.59           | L    | <b>1174.35</b> | <b>587.68</b>   | 1157.32        | 579.17           | 1156.34        | 578.67           | 10 |
| 13 | <b>1177.33</b> | <b>589.17</b>   |                |                  | 1159.31        | 580.16           | H    | <b>1061.20</b> | <b>531.10</b>   | <b>1044.16</b> | 522.59           | <b>1043.18</b> | 522.09           | 9  |
| 14 | <b>1264.41</b> | 632.71          |                |                  | 1246.39        | <b>623.70</b>    | S    | <b>924.06</b>  | <b>462.53</b>   | 907.03         | 454.02           | 906.04         | 453.52           | 8  |
| 15 | 1361.52        | <b>681.27</b>   |                |                  | 1343.51        | 672.26           | P    | <b>836.98</b>  | <b>418.99</b>   | 819.95         | 410.48           |                |                  | 7  |
| 16 | 1464.67        | 732.84          |                |                  | 1446.65        | 723.83           | C    | 739.86         | <b>370.44</b>   | 722.83         | 361.92           |                |                  | 6  |
| 17 | 1627.84        | 814.42          |                |                  | 1609.82        | 805.42           | Y    | 636.72         | 318.86          | 619.69         | 310.35           |                |                  | 5  |
| 18 | 1698.92        | <b>849.96</b>   |                |                  | 1680.90        | 840.95           | A    | 473.55         | 237.28          | 456.52         | 228.76           |                |                  | 4  |
| 19 | 1827.05        | 914.03          | 1810.02        | 905.51           | 1809.03        | 905.02           | Q    | <b>402.47</b>  | 201.74          | <b>385.44</b>  | 193.22           |                |                  | 3  |
| 20 | 1926.18        | 963.59          | 1909.15        | 955.08           | 1908.16        | 954.58           | V    | 274.34         | 137.67          | 257.31         | 129.16           |                |                  | 2  |
| 21 |                |                 |                |                  |                |                  | R    | 175.21         | 88.11           | 158.18         | 79.59            |                |                  | 1  |

Gene Symbol  
GAPDH

Sequences  
IISNASCTTNCLAPLAK

m/z  
923.52

Charge  
2+

Ion score  
72.8

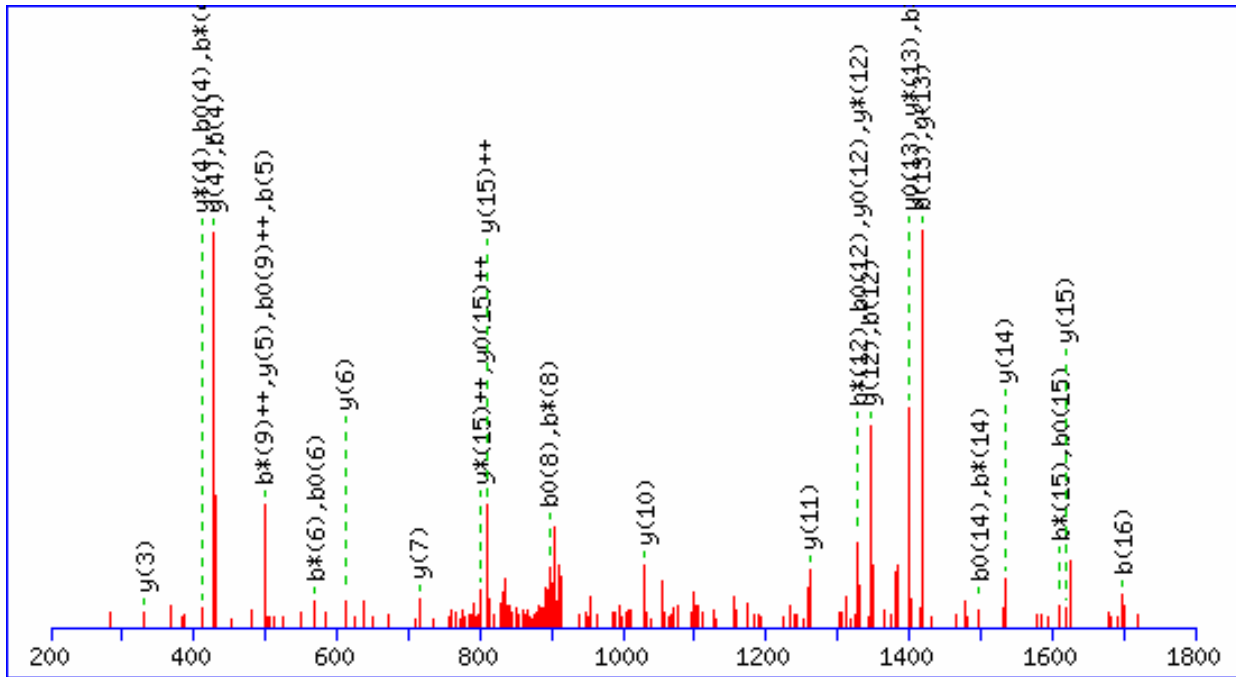

C7 : NEM (C)

| #  | b       | b <sup>++</sup> | b <sup>*</sup> | b <sup>*++</sup> | b <sup>0</sup> | b <sup>0++</sup> | Seq. | y       | y <sup>++</sup> | y <sup>*</sup> | y <sup>*++</sup> | y <sup>0</sup> | y <sup>0++</sup> | #  |
|----|---------|-----------------|----------------|------------------|----------------|------------------|------|---------|-----------------|----------------|------------------|----------------|------------------|----|
| 1  | 114.17  | 57.59           |                |                  |                |                  | I    |         |                 |                |                  |                |                  | 17 |
| 2  | 227.32  | 114.17          |                |                  |                |                  | I    | 1733.00 | 867.00          | 1715.97        | 858.49           | 1714.98        | 857.99           | 16 |
| 3  | 314.40  | 157.70          |                |                  | 296.39         | 148.70           | S    | 1619.84 | 810.42          | 1602.81        | 801.91           | 1601.82        | 801.42           | 15 |
| 4  | 428.50  | 214.76          | 411.47         | 206.24           | 410.49         | 205.75           | N    | 1532.76 | 766.88          | 1515.73        | 758.37           | 1514.75        | 757.88           | 14 |
| 5  | 499.58  | 250.29          | 482.55         | 241.78           | 481.57         | 241.29           | A    | 1418.66 | 709.83          | 1401.63        | 701.32           | 1400.64        | 700.83           | 13 |
| 6  | 586.66  | 293.83          | 569.63         | 285.32           | 568.64         | 284.83           | S    | 1347.58 | 674.29          | 1330.55        | 665.78           | 1329.57        | 665.29           | 12 |
| 7  | 814.93  | 407.97          | 797.90         | 399.45           | 796.91         | 398.96           | C    | 1260.50 | 630.76          | 1243.47        | 622.24           | 1242.49        | 621.75           | 11 |
| 8  | 916.03  | 458.52          | 899.00         | 450.00           | 898.02         | 449.51           | T    | 1032.24 | 516.62          | 1015.20        | 508.11           | 1014.22        | 507.61           | 10 |
| 9  | 1017.13 | 509.07          | 1000.10        | 500.56           | 999.12         | 500.06           | T    | 931.13  | 466.07          | 914.10         | 457.55           | 913.12         | 457.06           | 9  |
| 10 | 1131.24 | 566.12          | 1114.21        | 557.61           | 1113.22        | 557.11           | N    | 830.03  | 415.52          | 813.00         | 407.00           |                |                  | 8  |
| 11 | 1234.38 | 617.69          | 1217.35        | 609.18           | 1216.36        | 608.69           | C    | 715.92  | 358.47          | 698.89         | 349.95           |                |                  | 7  |
| 12 | 1347.54 | 674.27          | 1330.51        | 665.76           | 1329.52        | 665.27           | L    | 612.78  | 306.89          | 595.75         | 298.38           |                |                  | 6  |
| 13 | 1418.62 | 709.81          | 1401.58        | 701.30           | 1400.60        | 700.80           | A    | 499.62  | 250.32          | 482.59         | 241.80           |                |                  | 5  |
| 14 | 1515.73 | 758.37          | 1498.70        | 749.85           | 1497.72        | 749.36           | P    | 428.55  | 214.78          | 411.52         | 206.26           |                |                  | 4  |
| 15 | 1628.89 | 814.95          | 1611.86        | 806.43           | 1610.87        | 805.94           | L    | 331.43  | 166.22          | 314.40         | 157.70           |                |                  | 3  |
| 16 | 1699.97 | 850.49          | 1682.94        | 841.97           | 1681.95        | 841.48           | A    | 218.27  | 109.64          | 201.24         | 101.13           |                |                  | 2  |
| 17 |         |                 |                |                  |                |                  | K    | 147.20  | 74.10           | 130.16         | 65.59            |                |                  | 1  |

Gene Symbol  
GAPDH

Sequences  
IISNASCTTNCLAPLAK

m/z  
860.60

Charge  
2+

Ion score  
85.0

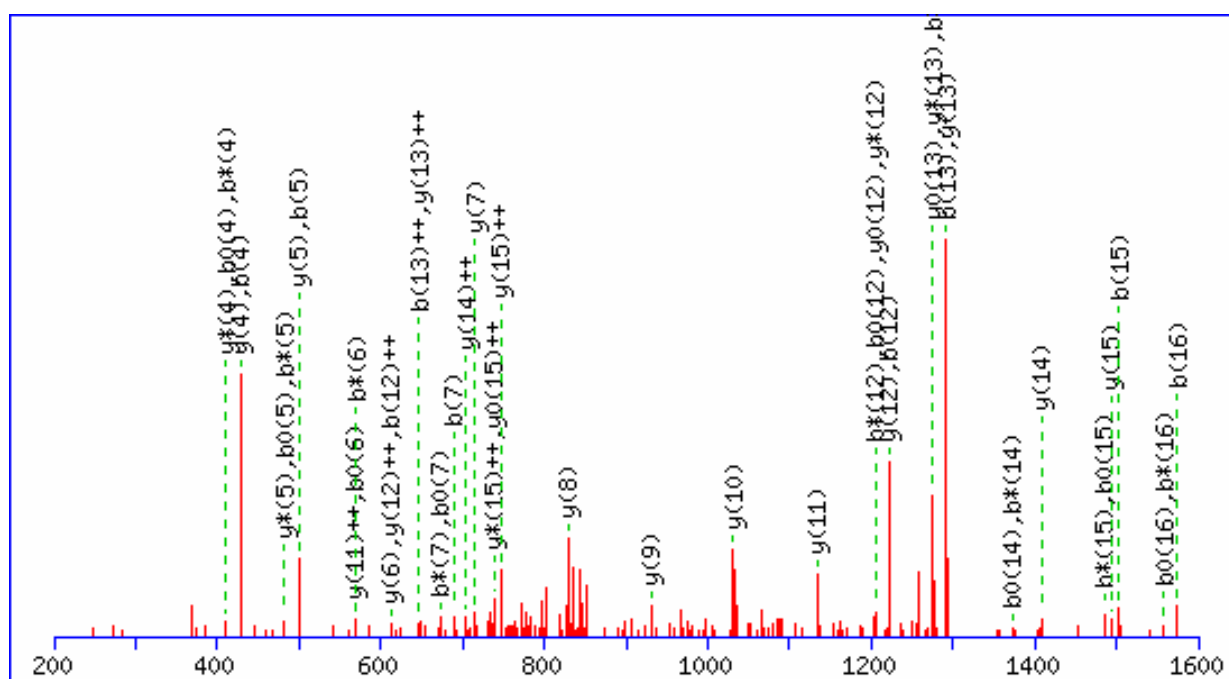

| #  | b       | b <sup>++</sup> | b <sup>*</sup> | b <sup>*++</sup> | b <sup>0</sup> | b <sup>0++</sup> | Seq. | y       | y <sup>++</sup> | y <sup>*</sup> | y <sup>*++</sup> | y <sup>0</sup> | y <sup>0++</sup> | #  |
|----|---------|-----------------|----------------|------------------|----------------|------------------|------|---------|-----------------|----------------|------------------|----------------|------------------|----|
| 1  | 114.17  | 57.59           |                |                  |                |                  | I    |         |                 |                |                  |                |                  | 17 |
| 2  | 227.32  | 114.17          |                |                  |                |                  | I    | 1607.87 | 804.44          | 1590.84        | 795.92           | 1589.86        | 795.43           | 16 |
| 3  | 314.40  | 157.70          |                |                  | 296.39         | 148.70           | S    | 1494.71 | 747.86          | 1477.68        | 739.35           | 1476.70        | 738.85           | 15 |
| 4  | 428.50  | 214.76          | 411.47         | 206.24           | 410.49         | 205.75           | N    | 1407.64 | 704.32          | 1390.61        | 695.81           | 1389.62        | 695.31           | 14 |
| 5  | 499.58  | 250.29          | 482.55         | 241.78           | 481.57         | 241.29           | A    | 1293.53 | 647.27          | 1276.50        | 638.76           | 1275.52        | 638.26           | 13 |
| 6  | 586.66  | 293.83          | 569.63         | 285.32           | 568.64         | 284.83           | S    | 1222.46 | 611.73          | 1205.42        | 603.22           | 1204.44        | 602.72           | 12 |
| 7  | 689.80  | 345.40          | 672.77         | 336.89           | 671.79         | 336.40           | C    | 1135.38 | 568.19          | 1118.35        | 559.68           | 1117.36        | 559.19           | 11 |
| 8  | 790.91  | 395.96          | 773.87         | 387.44           | 772.89         | 386.95           | T    | 1032.24 | 516.62          | 1015.20        | 508.11           | 1014.22        | 507.61           | 10 |
| 9  | 892.01  | 446.51          | 874.98         | 437.99           | 873.99         | 437.50           | T    | 931.13  | 466.07          | 914.10         | 457.55           | 913.12         | 457.06           | 9  |
| 10 | 1006.11 | 503.56          | 989.08         | 495.04           | 988.10         | 494.55           | N    | 830.03  | 415.52          | 813.00         | 407.00           |                |                  | 8  |
| 11 | 1109.25 | 555.13          | 1092.22        | 546.62           | 1091.24        | 546.12           | C    | 715.92  | 358.47          | 698.89         | 349.95           |                |                  | 7  |
| 12 | 1222.41 | 611.71          | 1205.38        | 603.19           | 1204.40        | 602.70           | L    | 612.78  | 306.89          | 595.75         | 298.38           |                |                  | 6  |
| 13 | 1293.49 | 647.25          | 1276.46        | 638.73           | 1275.47        | 638.24           | A    | 499.62  | 250.32          | 482.59         | 241.80           |                |                  | 5  |
| 14 | 1390.61 | 695.81          | 1373.57        | 687.29           | 1372.59        | 686.80           | P    | 428.55  | 214.78          | 411.52         | 206.26           |                |                  | 4  |
| 15 | 1503.76 | 752.39          | 1486.73        | 743.87           | 1485.75        | 743.38           | L    | 331.43  | 166.22          | 314.40         | 157.70           |                |                  | 3  |
| 16 | 1574.84 | 787.92          | 1557.81        | 779.41           | 1556.83        | 778.92           | A    | 218.27  | 109.64          | 201.24         | 101.13           |                |                  | 2  |
| 17 |         |                 |                |                  |                |                  | K    | 147.20  | 74.10           | 130.16         | 65.59            |                |                  | 1  |

Gene Symbol  
GFPT1

Sequences  
CGIFAYLNYHVPR

m/z  
777.17

Charge  
2+

Ion score  
61.8

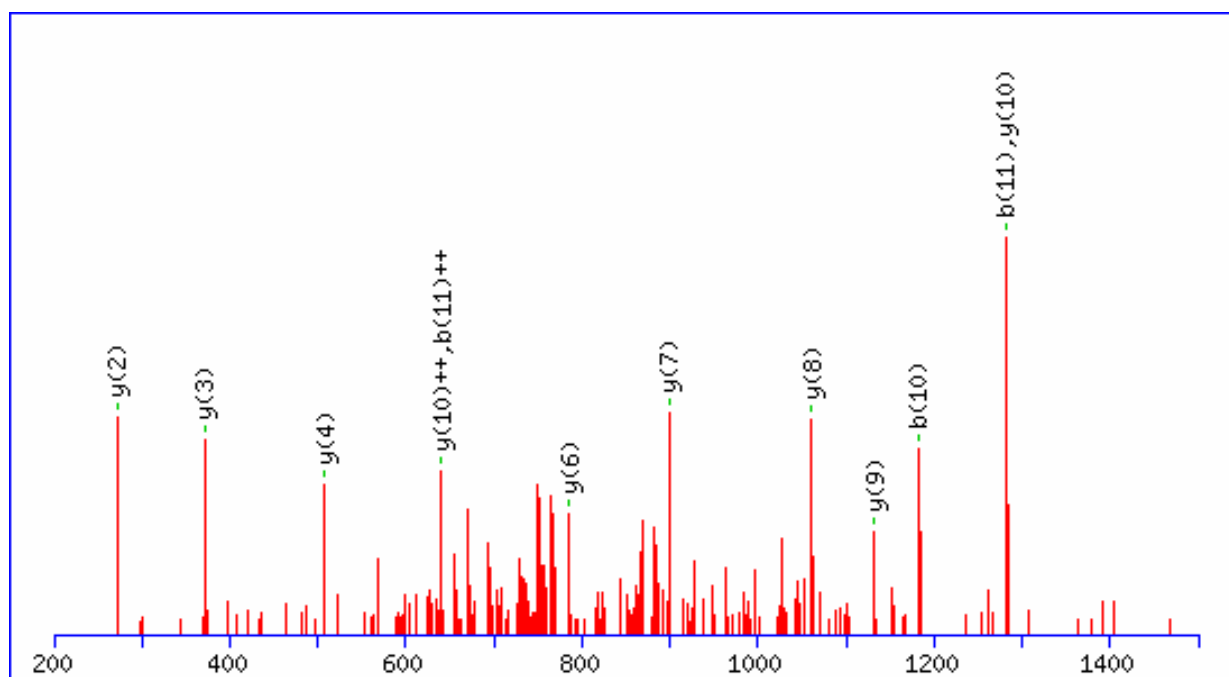

| #  | b       | b <sup>++</sup> | b <sup>*</sup> | b <sup>*++</sup> | Seq. | y       | y <sup>++</sup> | y <sup>*</sup> | y <sup>*++</sup> | #  |
|----|---------|-----------------|----------------|------------------|------|---------|-----------------|----------------|------------------|----|
| 1  | 104.15  | 52.58           |                |                  | C    |         |                 |                |                  | 13 |
| 2  | 161.20  | 81.11           |                |                  | G    | 1450.66 | 725.83          | 1433.63        | 717.32           | 12 |
| 3  | 274.36  | 137.68          |                |                  | I    | 1393.61 | 697.31          | 1376.58        | 688.79           | 11 |
| 4  | 421.53  | 211.27          |                |                  | F    | 1280.45 | 640.73          | 1263.42        | 632.22           | 10 |
| 5  | 492.61  | 246.81          |                |                  | A    | 1133.28 | 567.14          | 1116.25        | 558.63           | 9  |
| 6  | 655.78  | 328.40          |                |                  | Y    | 1062.20 | 531.60          | 1045.17        | 523.09           | 8  |
| 7  | 768.94  | 384.98          |                |                  | L    | 899.03  | 450.02          | 882.00         | 441.50           | 7  |
| 8  | 883.05  | 442.03          | 866.01         | 433.51           | N    | 785.87  | 393.44          | 768.84         | 384.92           | 6  |
| 9  | 1046.22 | 523.61          | 1029.19        | 515.10           | Y    | 671.77  | 336.39          | 654.74         | 327.87           | 5  |
| 10 | 1183.36 | 592.18          | 1166.33        | 583.67           | H    | 508.59  | 254.80          | 491.56         | 246.29           | 4  |
| 11 | 1282.49 | 641.75          | 1265.46        | 633.23           | V    | 371.46  | 186.23          | 354.42         | 177.72           | 3  |
| 12 | 1379.60 | 690.31          | 1362.57        | 681.79           | P    | 272.32  | 136.67          | 255.29         | 128.15           | 2  |
| 13 |         |                 |                |                  | R    | 175.21  | 88.11           | 158.18         | 79.59            | 1  |

Gene Symbol  
GNA11

Sequences  
TLESMMAC**C**LSDEVKESK

m/z  
1086.37

Charge  
2+

Ion score  
93.5

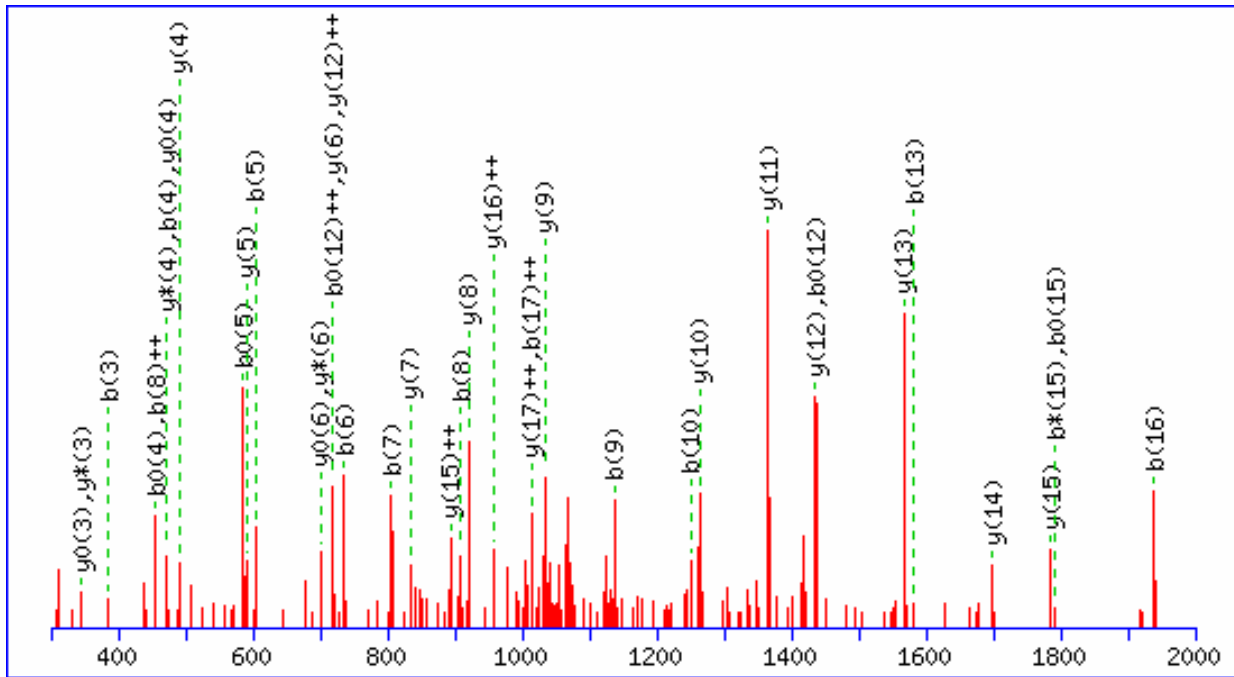

N-term : N-Acetyl (Protein)  
C9 : NEM (C)

| #  | b              | b <sup>++</sup> | b <sup>*</sup> | b <sup>+++</sup> | b <sup>0</sup> | b <sup>0++</sup> | Seq. | y              | y <sup>++</sup> | y <sup>*</sup> | y <sup>+++</sup> | y <sup>0</sup> | y <sup>0++</sup> | #  |
|----|----------------|-----------------|----------------|------------------|----------------|------------------|------|----------------|-----------------|----------------|------------------|----------------|------------------|----|
| 1  | 144.15         | 72.58           |                |                  | 126.13         | 63.57            | T    |                |                 |                |                  |                |                  | 18 |
| 2  | 257.31         | 129.16          |                |                  | 239.29         | 120.15           | L    | 2029.36        | <b>1015.18</b>  | 2012.33        | 1006.67          | 2011.34        | 1006.17          | 17 |
| 3  | <b>386.42</b>  | 193.71          |                |                  | 368.40         | 184.71           | E    | 1916.20        | <b>958.60</b>   | 1899.17        | 950.09           | 1898.18        | 949.60           | 16 |
| 4  | <b>473.50</b>  | 237.25          |                |                  | <b>455.48</b>  | 228.25           | S    | <b>1787.09</b> | <b>894.05</b>   | 1770.05        | 885.53           | 1769.07        | 885.04           | 15 |
| 5  | <b>604.69</b>  | 302.85          |                |                  | <b>586.68</b>  | 293.84           | M    | <b>1700.01</b> | 850.51          | 1682.98        | 841.99           | 1681.99        | 841.50           | 14 |
| 6  | <b>735.89</b>  | 368.45          |                |                  | 717.87         | 359.44           | M    | <b>1568.81</b> | 784.91          | 1551.78        | 776.39           | 1550.80        | 775.90           | 13 |
| 7  | <b>806.97</b>  | 403.99          |                |                  | 788.95         | 394.98           | A    | <b>1437.62</b> | <b>719.31</b>   | 1420.59        | 710.80           | 1419.60        | 710.30           | 12 |
| 8  | <b>910.11</b>  | <b>455.56</b>   |                |                  | 892.10         | 446.55           | C    | <b>1366.54</b> | 683.77          | 1349.51        | 675.26           | 1348.52        | 674.77           | 11 |
| 9  | <b>1138.38</b> | 569.69          |                |                  | 1120.36        | 560.69           | C    | <b>1263.39</b> | 632.20          | 1246.36        | 623.69           | 1245.38        | 623.19           | 10 |
| 10 | <b>1251.54</b> | 626.27          |                |                  | 1233.52        | 617.26           | L    | <b>1035.13</b> | 518.07          | 1018.10        | 509.55           | 1017.11        | 509.06           | 9  |
| 11 | 1338.61        | 669.81          |                |                  | 1320.60        | 660.80           | S    | <b>921.97</b>  | 461.49          | 904.94         | 452.97           | 903.95         | 452.48           | 8  |
| 12 | 1453.70        | 727.35          |                |                  | <b>1435.69</b> | <b>718.35</b>    | D    | <b>834.89</b>  | 417.95          | 817.86         | 409.43           | 816.88         | 408.94           | 7  |
| 13 | <b>1582.81</b> | 791.91          |                |                  | 1564.80        | 782.90           | E    | <b>719.80</b>  | 360.41          | <b>702.77</b>  | 351.89           | <b>701.79</b>  | 351.40           | 6  |
| 14 | 1681.95        | 841.48          |                |                  | 1663.93        | 832.47           | V    | <b>590.69</b>  | 295.85          | 573.66         | 287.33           | 572.67         | 286.84           | 5  |
| 15 | 1810.12        | 905.56          | <b>1793.09</b> | 897.05           | <b>1792.10</b> | 896.56           | K    | <b>491.56</b>  | 246.28          | <b>474.53</b>  | 237.77           | <b>473.54</b>  | 237.28           | 4  |
| 16 | <b>1939.23</b> | 970.12          | 1922.20        | 961.60           | 1921.22        | 961.11           | E    | 363.39         | 182.20          | <b>346.36</b>  | 173.68           | <b>345.37</b>  | 173.19           | 3  |
| 17 | 2026.31        | <b>1013.66</b>  | 2009.28        | 1005.14          | 2008.29        | 1004.65          | S    | 234.27         | 117.64          | 217.24         | 109.13           | 216.26         | 108.63           | 2  |
| 18 |                |                 |                |                  |                |                  | K    | 147.20         | 74.10           | 130.16         | 65.59            |                |                  | 1  |

Gene Symbol  
GNA11

Sequences  
TLESMMA**C**CLSDEVKESK

m/z  
1024.24

Charge  
2+

Ion score  
107.9

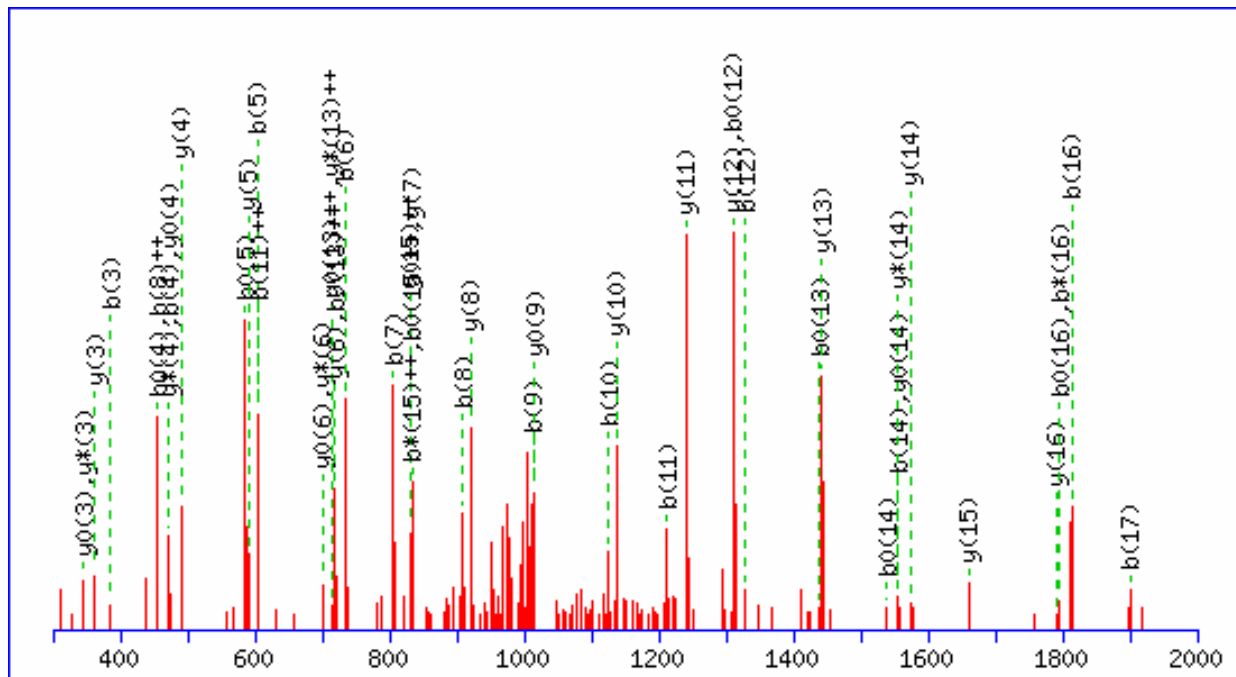

N-term : N-Acetyl (Protein)

| #  | b              | b <sup>++</sup> | b <sup>*</sup> | b <sup>+++</sup> | b <sup>0</sup> | b <sup>0++</sup> | Seq. | y              | y <sup>++</sup> | y <sup>*</sup> | y <sup>+++</sup> | y <sup>0</sup> | y <sup>0++</sup> | #  |
|----|----------------|-----------------|----------------|------------------|----------------|------------------|------|----------------|-----------------|----------------|------------------|----------------|------------------|----|
| 1  | 144.15         | 72.58           |                |                  | 126.13         | 63.57            | T    |                |                 |                |                  |                |                  | 18 |
| 2  | 257.31         | 129.16          |                |                  | 239.29         | 120.15           | L    | 1904.23        | 952.62          | 1887.20        | 944.10           | 1886.22        | 943.61           | 17 |
| 3  | <b>386.42</b>  | 193.71          |                |                  | 368.40         | 184.71           | E    | <b>1791.07</b> | 896.04          | 1774.04        | 887.53           | 1773.06        | 887.03           | 16 |
| 4  | <b>473.50</b>  | 237.25          |                |                  | <b>455.48</b>  | 228.25           | S    | <b>1661.96</b> | <b>831.48</b>   | 1644.93        | 822.97           | 1643.94        | 822.48           | 15 |
| 5  | <b>604.69</b>  | 302.85          |                |                  | <b>586.68</b>  | 293.84           | M    | <b>1574.88</b> | 787.95          | <b>1557.85</b> | 779.43           | <b>1556.87</b> | 778.94           | 14 |
| 6  | <b>735.89</b>  | 368.45          |                |                  | 717.87         | 359.44           | M    | <b>1443.69</b> | 722.35          | 1426.66        | <b>713.83</b>    | 1425.67        | <b>713.34</b>    | 13 |
| 7  | <b>806.97</b>  | 403.99          |                |                  | 788.95         | 394.98           | A    | <b>1312.49</b> | 656.75          | 1295.46        | 648.23           | 1294.47        | 647.74           | 12 |
| 8  | <b>910.11</b>  | <b>455.56</b>   |                |                  | 892.10         | 446.55           | C    | <b>1241.41</b> | 621.21          | 1224.38        | 612.69           | 1223.40        | 612.20           | 11 |
| 9  | <b>1013.25</b> | 507.13          |                |                  | 995.24         | 498.12           | C    | <b>1138.27</b> | 569.64          | 1121.24        | 561.12           | 1120.25        | 560.63           | 10 |
| 10 | <b>1126.41</b> | 563.71          |                |                  | 1108.40        | 554.70           | L    | 1035.13        | 518.07          | 1018.10        | 509.55           | <b>1017.11</b> | 509.06           | 9  |
| 11 | <b>1213.49</b> | <b>607.25</b>   |                |                  | 1195.47        | 598.24           | S    | <b>921.97</b>  | 461.49          | 904.94         | 452.97           | 903.95         | 452.48           | 8  |
| 12 | <b>1328.58</b> | 664.79          |                |                  | <b>1310.56</b> | 655.78           | D    | <b>834.89</b>  | 417.95          | 817.86         | 409.43           | 816.88         | 408.94           | 7  |
| 13 | 1457.69        | 729.35          |                |                  | <b>1439.67</b> | <b>720.34</b>    | E    | <b>719.80</b>  | 360.41          | <b>702.77</b>  | 351.89           | <b>701.79</b>  | 351.40           | 6  |
| 14 | <b>1556.82</b> | 778.91          |                |                  | <b>1538.81</b> | 769.91           | V    | <b>590.69</b>  | 295.85          | 573.66         | 287.33           | 572.67         | 286.84           | 5  |
| 15 | 1684.99        | 843.00          | 1667.96        | <b>834.49</b>    | 1666.98        | <b>833.99</b>    | K    | <b>491.56</b>  | 246.28          | <b>474.53</b>  | 237.77           | <b>473.54</b>  | 237.28           | 4  |
| 16 | <b>1814.11</b> | 907.56          | <b>1797.08</b> | 899.04           | <b>1796.09</b> | 898.55           | E    | <b>363.39</b>  | 182.20          | <b>346.36</b>  | 173.68           | <b>345.37</b>  | 173.19           | 3  |
| 17 | <b>1901.18</b> | 951.10          | 1884.15        | 942.58           | 1883.17        | 942.09           | S    | 234.27         | 117.64          | 217.24         | 109.13           | 216.26         | 108.63           | 2  |
| 18 |                |                 |                |                  |                |                  | K    | 147.20         | 74.10           | 130.16         | 65.59            |                |                  | 1  |

Gene Symbol  
GNA12

Sequences  
CLLPAEAGGAR

m/z  
529.45

Charge  
2+

Ion score  
53.6

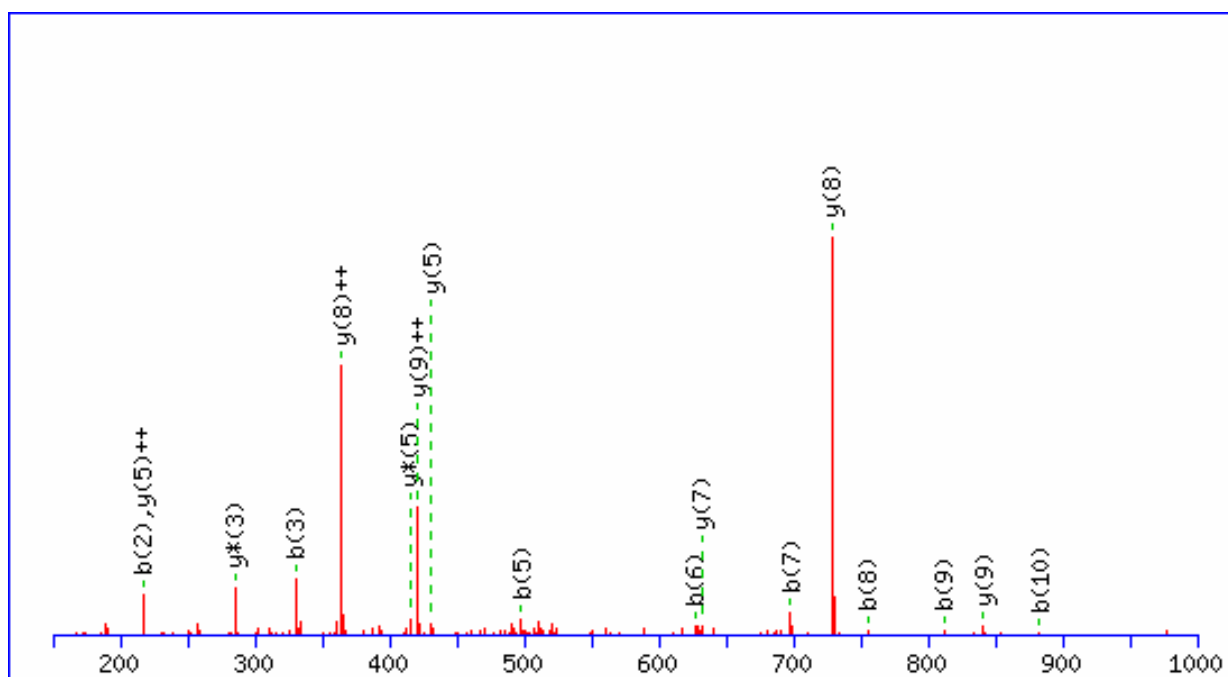

| #  | b      | b <sup>++</sup> | b <sup>0</sup> | b <sup>0++</sup> | Seq. | y      | y <sup>++</sup> | y <sup>*</sup> | y <sup>*++</sup> | y <sup>0</sup> | y <sup>0++</sup> | #  |
|----|--------|-----------------|----------------|------------------|------|--------|-----------------|----------------|------------------|----------------|------------------|----|
| 1  | 104.15 | 52.58           |                |                  | C    |        |                 |                |                  |                |                  | 11 |
| 2  | 217.31 | 109.16          |                |                  | L    | 955.09 | 478.05          | 938.06         | 469.53           | 937.07         | 469.04           | 10 |
| 3  | 330.47 | 165.74          |                |                  | L    | 841.93 | 421.47          | 824.90         | 412.95           | 823.92         | 412.46           | 9  |
| 4  | 427.58 | 214.29          |                |                  | P    | 728.77 | 364.89          | 711.74         | 356.38           | 710.76         | 355.88           | 8  |
| 5  | 498.66 | 249.83          |                |                  | A    | 631.66 | 316.33          | 614.63         | 307.82           | 613.64         | 307.33           | 7  |
| 6  | 627.77 | 314.39          | 609.76         | 305.38           | E    | 560.58 | 280.79          | 543.55         | 272.28           | 542.57         | 271.79           | 6  |
| 7  | 698.85 | 349.93          | 680.84         | 340.92           | A    | 431.47 | 216.24          | 414.44         | 207.72           |                |                  | 5  |
| 8  | 755.90 | 378.46          | 737.89         | 369.45           | G    | 360.39 | 180.70          | 343.36         | 172.18           |                |                  | 4  |
| 9  | 812.95 | 406.98          | 794.94         | 397.97           | G    | 303.34 | 152.17          | 286.31         | 143.66           |                |                  | 3  |
| 10 | 884.03 | 442.52          | 866.02         | 433.51           | A    | 246.29 | 123.65          | 229.26         | 115.13           |                |                  | 2  |
| 11 |        |                 |                |                  | R    | 175.21 | 88.11           | 158.18         | 79.59            |                |                  | 1  |



Gene Symbol  
GNA13

Sequences  
SVLSV**C**FP**G**CL**L**TS**G**EA**E**Q**R**

m/z  
1175.93

Charge  
2+

Ion score  
97.5

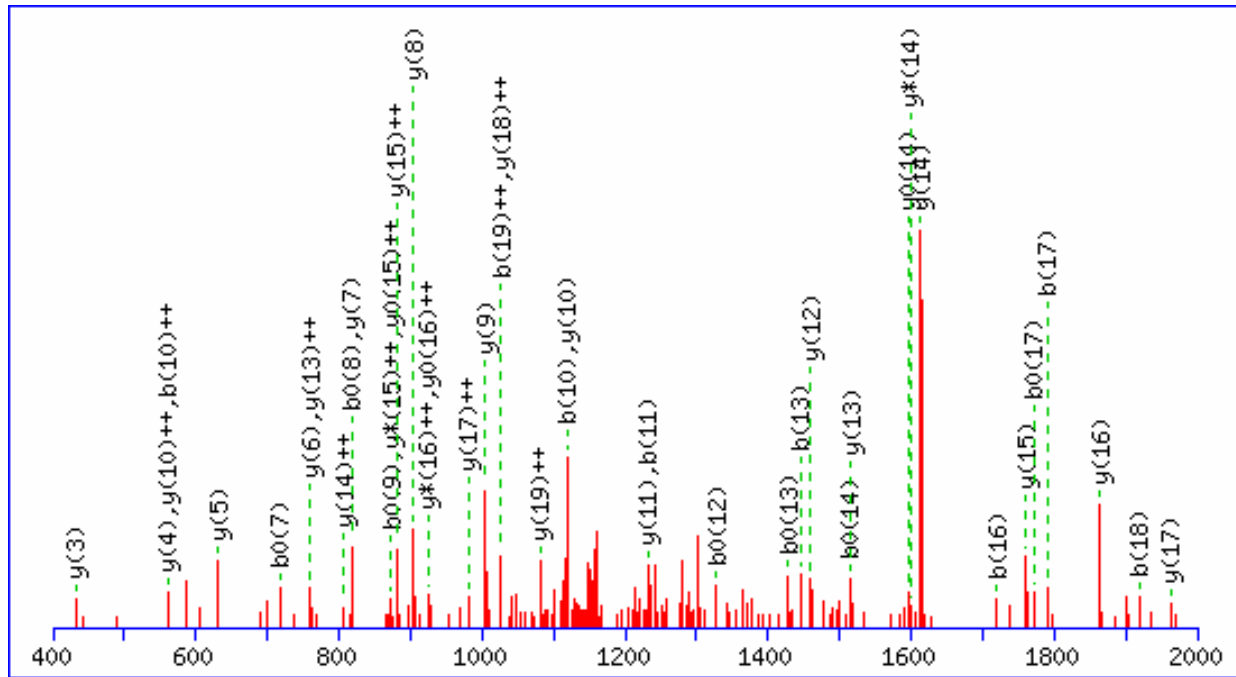

**C10** : NEM (C)

| #  | b              | b <sup>++</sup> | b <sup>*</sup> | b <sup>+++</sup> | b <sup>0</sup> | b <sup>0++</sup> | Seq. | y              | y <sup>++</sup> | y <sup>*</sup> | y <sup>+++</sup> | y <sup>0</sup> | y <sup>0++</sup> | #  |
|----|----------------|-----------------|----------------|------------------|----------------|------------------|------|----------------|-----------------|----------------|------------------|----------------|------------------|----|
| 1  | 88.09          | 44.55           |                |                  | 70.07          | 35.54            | S    |                |                 |                |                  |                |                  | 21 |
| 2  | 187.22         | 94.11           |                |                  | 169.20         | 85.10            | V    | 2263.57        | 1132.29         | 2246.54        | 1123.77          | 2245.55        | 1123.28          | 20 |
| 3  | 300.37         | 150.69          |                |                  | 282.36         | 141.68           | L    | 2164.44        | <b>1082.72</b>  | 2147.41        | 1074.21          | 2146.42        | 1073.72          | 19 |
| 4  | 387.45         | 194.23          |                |                  | 369.44         | 185.22           | S    | 2051.28        | <b>1026.14</b>  | 2034.25        | 1017.63          | 2033.27        | 1017.14          | 18 |
| 5  | 486.58         | 243.80          |                |                  | 468.57         | 234.79           | V    | <b>1964.20</b> | <b>982.61</b>   | 1947.17        | 974.09           | 1946.19        | 973.60           | 17 |
| 6  | 589.73         | 295.37          |                |                  | 571.71         | 286.36           | C    | <b>1865.07</b> | 933.04          | 1848.04        | <b>924.52</b>    | 1847.06        | <b>924.03</b>    | 16 |
| 7  | 736.90         | 368.95          |                |                  | <b>718.88</b>  | 359.95           | F    | <b>1761.93</b> | <b>881.47</b>   | 1744.90        | <b>872.95</b>    | 1743.91        | <b>872.46</b>    | 15 |
| 8  | 834.01         | 417.51          |                |                  | <b>816.00</b>  | 408.50           | P    | <b>1614.76</b> | <b>807.88</b>   | <b>1597.73</b> | 799.37           | <b>1596.74</b> | 798.87           | 14 |
| 9  | 891.07         | 446.04          |                |                  | <b>873.05</b>  | 437.03           | G    | <b>1517.64</b> | <b>759.32</b>   | 1500.61        | 750.81           | 1499.63        | 750.32           | 13 |
| 10 | <b>1119.33</b> | <b>560.17</b>   |                |                  | 1101.32        | 551.16           | C    | <b>1460.59</b> | 730.80          | 1443.56        | 722.28           | 1442.57        | 721.79           | 12 |
| 11 | <b>1232.49</b> | 616.75          |                |                  | 1214.48        | 607.74           | L    | <b>1232.32</b> | 616.66          | 1215.29        | 608.15           | 1214.31        | 607.66           | 11 |
| 12 | 1345.65        | 673.33          |                |                  | <b>1327.63</b> | 664.32           | L    | <b>1119.16</b> | <b>560.09</b>   | 1102.13        | 551.57           | 1101.15        | 551.08           | 10 |
| 13 | <b>1446.75</b> | 723.88          |                |                  | <b>1428.74</b> | 714.87           | T    | <b>1006.01</b> | 503.51          | 988.98         | 494.99           | 987.99         | 494.50           | 9  |
| 14 | 1533.83        | 767.42          |                |                  | <b>1515.81</b> | 758.41           | S    | <b>904.90</b>  | 452.95          | 887.87         | 444.44           | 886.89         | 443.95           | 8  |
| 15 | 1590.88        | 795.94          |                |                  | 1572.87        | 786.94           | G    | <b>817.82</b>  | 409.42          | 800.79         | 400.90           | 799.81         | 400.41           | 7  |
| 16 | <b>1720.00</b> | 860.50          |                |                  | 1701.98        | 851.49           | E    | <b>760.77</b>  | 380.89          | 743.74         | 372.38           | 742.76         | 371.88           | 6  |
| 17 | <b>1791.07</b> | 896.04          |                |                  | <b>1773.06</b> | 887.03           | A    | <b>631.66</b>  | 316.33          | 614.63         | 307.82           | 613.64         | 307.33           | 5  |
| 18 | <b>1920.19</b> | 960.60          |                |                  | 1902.17        | 951.59           | E    | <b>560.58</b>  | 280.79          | 543.55         | 272.28           | 542.57         | 271.79           | 4  |
| 19 | 2048.32        | <b>1024.66</b>  | 2031.29        | 1016.15          | 2030.30        | 1015.65          | Q    | <b>431.47</b>  | 216.24          | 414.44         | 207.72           |                |                  | 3  |
| 20 | 2176.45        | 1088.73         | 2159.42        | 1080.21          | 2158.43        | 1079.72          | Q    | 303.34         | 152.17          | 286.31         | 143.66           |                |                  | 2  |
| 21 |                |                 |                |                  |                |                  | R    | 175.21         | 88.11           | 158.18         | 79.59            |                |                  | 1  |

Gene Symbol  
GNA13

Sequences  
SVLSVCFPGCLLTSGEAEQQR

m/z  
1113.54

Charge  
2+

Ion score  
114.5

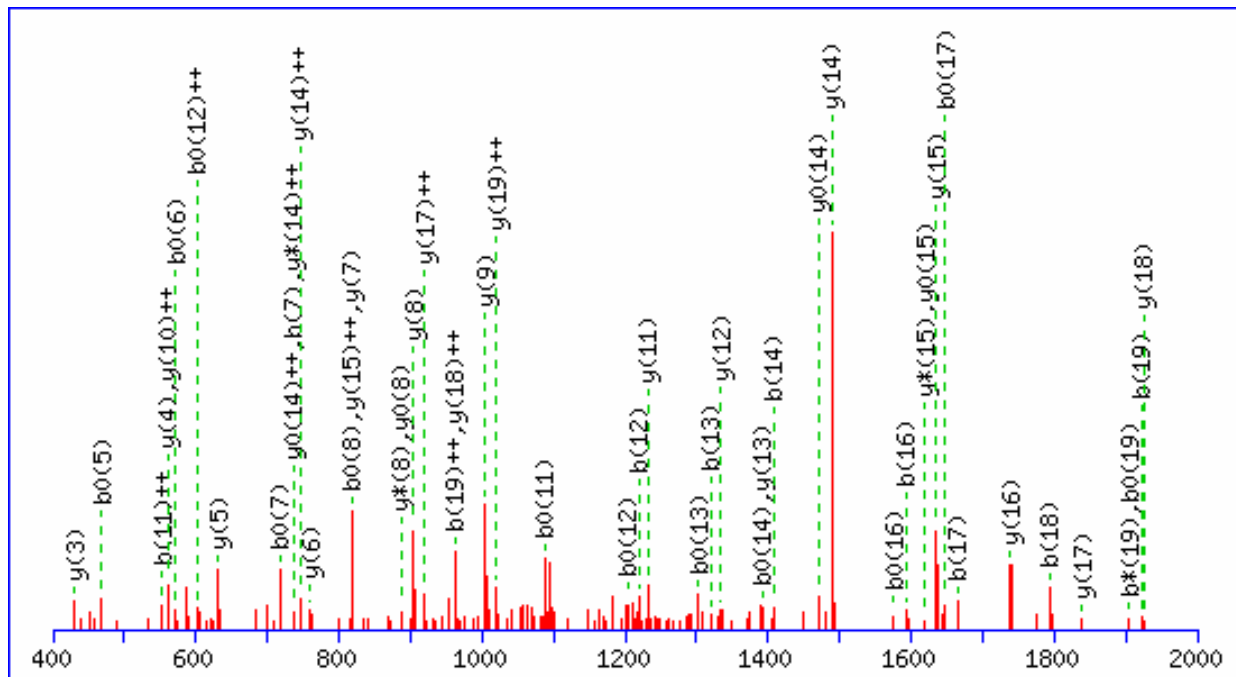

| #  | b              | b <sup>++</sup> | b <sup>*</sup> | b <sup>*++</sup> | b <sup>0</sup> | b <sup>0++</sup> | Seq. | y              | y <sup>++</sup> | y <sup>*</sup> | y <sup>*++</sup> | y <sup>0</sup> | y <sup>0++</sup> | #  |
|----|----------------|-----------------|----------------|------------------|----------------|------------------|------|----------------|-----------------|----------------|------------------|----------------|------------------|----|
| 1  | 88.09          | 44.55           |                |                  | 70.07          | 35.54            | S    |                |                 |                |                  |                |                  | 21 |
| 2  | 187.22         | 94.11           |                |                  | 169.20         | 85.10            | V    | 2138.44        | 1069.73         | 2121.41        | 1061.21          | 2120.43        | 1060.72          | 20 |
| 3  | 300.37         | 150.69          |                |                  | 282.36         | 141.68           | L    | 2039.31        | <b>1020.16</b>  | 2022.28        | 1011.65          | 2021.30        | 1011.15          | 19 |
| 4  | 387.45         | 194.23          |                |                  | 369.44         | 185.22           | S    | <b>1926.16</b> | <b>963.58</b>   | 1909.13        | 955.07           | 1908.14        | 954.57           | 18 |
| 5  | 486.58         | 243.80          |                |                  | <b>468.57</b>  | 234.79           | V    | <b>1839.08</b> | <b>920.04</b>   | 1822.05        | 911.53           | 1821.06        | 911.04           | 17 |
| 6  | 589.73         | 295.37          |                |                  | <b>571.71</b>  | 286.36           | C    | <b>1739.95</b> | 870.48          | 1722.92        | 861.96           | 1721.93        | 861.47           | 16 |
| 7  | <b>736.90</b>  | 368.95          |                |                  | <b>718.88</b>  | 359.95           | F    | <b>1636.80</b> | <b>818.91</b>   | <b>1619.77</b> | 810.39           | <b>1618.79</b> | 809.90           | 15 |
| 8  | 834.01         | 417.51          |                |                  | <b>816.00</b>  | 408.50           | P    | <b>1489.63</b> | <b>745.32</b>   | 1472.60        | <b>736.80</b>    | <b>1471.62</b> | <b>736.31</b>    | 14 |
| 9  | 891.07         | 446.04          |                |                  | 873.05         | 437.03           | G    | <b>1392.52</b> | 696.76          | 1375.48        | 688.25           | 1374.50        | 687.75           | 13 |
| 10 | 994.21         | 497.61          |                |                  | 976.19         | 488.60           | C    | <b>1335.46</b> | 668.24          | 1318.43        | 659.72           | 1317.45        | 659.23           | 12 |
| 11 | 1107.37        | <b>554.19</b>   |                |                  | <b>1089.35</b> | 545.18           | L    | <b>1232.32</b> | 616.66          | 1215.29        | 608.15           | 1214.31        | 607.66           | 11 |
| 12 | <b>1220.52</b> | 610.77          |                |                  | <b>1202.51</b> | <b>601.76</b>    | L    | 1119.16        | <b>560.09</b>   | 1102.13        | 551.57           | 1101.15        | 551.08           | 10 |
| 13 | <b>1321.63</b> | 661.32          |                |                  | <b>1303.61</b> | 652.31           | T    | <b>1006.01</b> | 503.51          | 988.98         | 494.99           | 987.99         | 494.50           | 9  |
| 14 | <b>1408.70</b> | 704.86          |                |                  | <b>1390.69</b> | 695.85           | S    | <b>904.90</b>  | 452.95          | <b>887.87</b>  | 444.44           | <b>886.89</b>  | 443.95           | 8  |
| 15 | 1465.76        | 733.38          |                |                  | 1447.74        | 724.37           | G    | <b>817.82</b>  | 409.42          | 800.79         | 400.90           | 799.81         | 400.41           | 7  |
| 16 | <b>1594.87</b> | 797.94          |                |                  | <b>1576.85</b> | 788.93           | E    | <b>760.77</b>  | 380.89          | 743.74         | 372.38           | 742.76         | 371.88           | 6  |
| 17 | <b>1665.95</b> | 833.48          |                |                  | <b>1647.93</b> | 824.47           | A    | <b>631.66</b>  | 316.33          | 614.63         | 307.82           | 613.64         | 307.33           | 5  |
| 18 | <b>1795.06</b> | 898.04          |                |                  | 1777.05        | 889.03           | E    | <b>560.58</b>  | 280.79          | 543.55         | 272.28           | 542.57         | 271.79           | 4  |
| 19 | <b>1923.19</b> | <b>962.10</b>   | <b>1906.16</b> | 953.58           | <b>1905.18</b> | 953.09           | Q    | <b>431.47</b>  | 216.24          | 414.44         | 207.72           |                |                  | 3  |
| 20 | 2051.32        | 1026.16         | 2034.29        | 1017.65          | 2033.31        | 1017.16          | Q    | 303.34         | 152.17          | 286.31         | 143.66           |                |                  | 2  |
| 21 |                |                 |                |                  |                |                  | R    | 175.21         | 88.11           | 158.18         | 79.59            |                |                  | 1  |

Gene Symbol  
GNAQ

Sequences  
TLESIMAC**C**CLSEEAKEAR

m/z  
1076.50

Charge  
2+

Ion score  
67.7

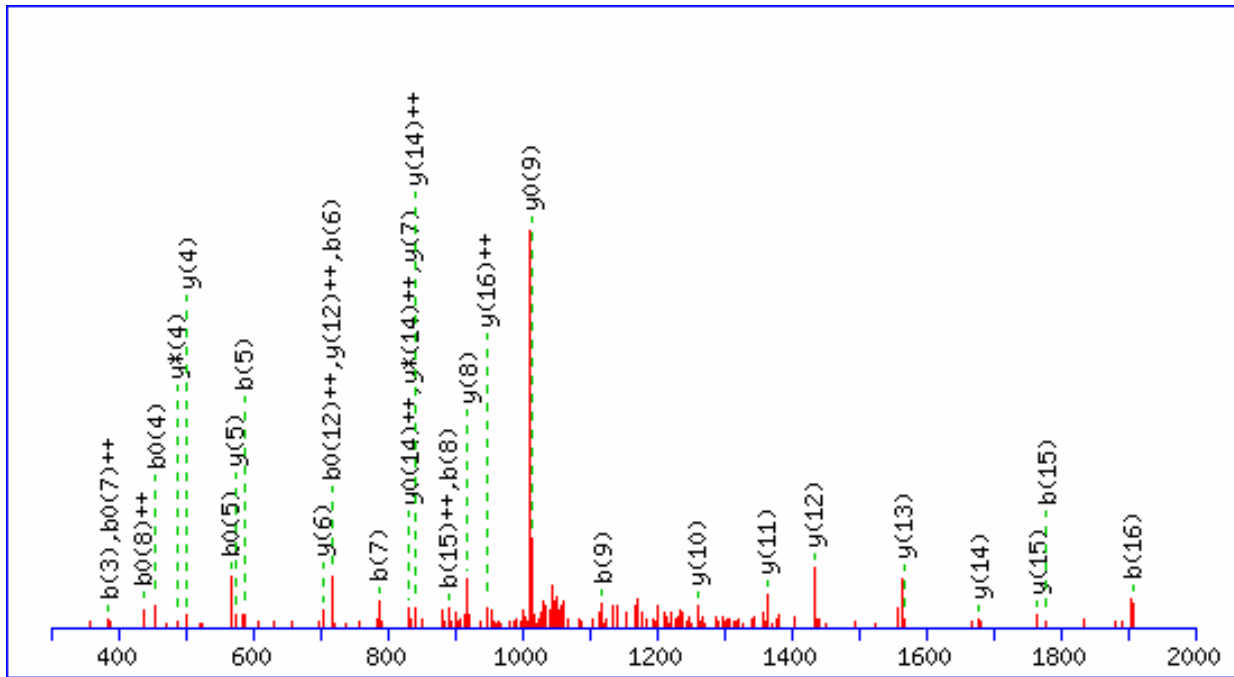

N-term : N-Acetyl (Protein)  
C9 : NEM (C)

| #  | b              | b <sup>++</sup> | b <sup>*</sup> | b <sup>+++</sup> | b <sup>0</sup> | b <sup>0++</sup> | Seq. | y              | y <sup>++</sup> | y <sup>*</sup> | y <sup>+++</sup> | y <sup>0</sup> | y <sup>0++</sup> | #  |
|----|----------------|-----------------|----------------|------------------|----------------|------------------|------|----------------|-----------------|----------------|------------------|----------------|------------------|----|
| 1  | 144.15         | 72.58           |                |                  | 126.13         | 63.57            | T    |                |                 |                |                  |                |                  | 18 |
| 2  | 257.31         | 129.16          |                |                  | 239.29         | 120.15           | L    | 2009.31        | 1005.16         | 1992.28        | 996.64           | 1991.29        | 996.15           | 17 |
| 3  | <b>386.42</b>  | 193.71          |                |                  | 368.40         | 184.71           | E    | 1896.15        | <b>948.58</b>   | 1879.12        | 940.06           | 1878.13        | 939.57           | 16 |
| 4  | 473.50         | 237.25          |                |                  | <b>455.48</b>  | 228.25           | S    | <b>1767.03</b> | 884.02          | 1750.00        | 875.51           | 1749.02        | 875.01           | 15 |
| 5  | <b>586.66</b>  | 293.83          |                |                  | <b>568.64</b>  | 284.82           | I    | <b>1679.96</b> | <b>840.48</b>   | 1662.93        | <b>831.97</b>    | 1661.94        | <b>831.47</b>    | 14 |
| 6  | <b>717.85</b>  | 359.43          |                |                  | 699.84         | 350.42           | M    | <b>1566.80</b> | 783.90          | 1549.77        | 775.39           | 1548.78        | 774.90           | 13 |
| 7  | <b>788.93</b>  | 394.97          |                |                  | 770.91         | <b>385.96</b>    | A    | <b>1435.60</b> | <b>718.31</b>   | 1418.57        | 709.79           | 1417.59        | 709.30           | 12 |
| 8  | <b>892.07</b>  | 446.54          |                |                  | 874.06         | <b>437.53</b>    | C    | <b>1364.53</b> | 682.77          | 1347.49        | 674.25           | 1346.51        | 673.76           | 11 |
| 9  | <b>1120.34</b> | 560.67          |                |                  | 1102.32        | 551.67           | C    | <b>1261.38</b> | 631.20          | 1244.35        | 622.68           | 1243.37        | 622.19           | 10 |
| 10 | 1233.50        | 617.25          |                |                  | 1215.48        | 608.25           | L    | 1033.11        | 517.06          | 1016.08        | 508.55           | <b>1015.10</b> | 508.05           | 9  |
| 11 | 1320.58        | 660.79          |                |                  | 1302.56        | 651.78           | S    | <b>919.96</b>  | 460.48          | 902.93         | 451.97           | 901.94         | 451.47           | 8  |
| 12 | 1449.69        | 725.35          |                |                  | 1431.67        | <b>716.34</b>    | E    | <b>832.88</b>  | 416.94          | 815.85         | 408.43           | 814.86         | 407.94           | 7  |
| 13 | 1578.80        | 789.91          |                |                  | 1560.79        | 780.90           | E    | <b>703.77</b>  | 352.39          | 686.73         | 343.87           | 685.75         | 343.38           | 6  |
| 14 | 1649.88        | 825.44          |                |                  | 1631.87        | 816.44           | A    | <b>574.65</b>  | 287.83          | 557.62         | 279.31           | 556.64         | 278.82           | 5  |
| 15 | <b>1778.05</b> | <b>889.53</b>   | 1761.02        | 881.02           | 1760.04        | 880.52           | K    | <b>503.57</b>  | 252.29          | <b>486.54</b>  | 243.78           | 485.56         | 243.28           | 4  |
| 16 | <b>1907.17</b> | 954.09          | 1890.14        | 945.57           | 1889.15        | 945.08           | E    | 375.40         | 188.20          | 358.37         | 179.69           | 357.39         | 179.20           | 3  |
| 17 | 1978.25        | 989.63          | 1961.21        | 981.11           | 1960.23        | 980.62           | A    | 246.29         | 123.65          | 229.26         | 115.13           |                |                  | 2  |
| 18 |                |                 |                |                  |                |                  | R    | 175.21         | 88.11           | 158.18         | 79.59            |                |                  | 1  |

Gene Symbol  
GNAQ

Sequences  
TLESIMAC**CL**SEEAKEAR

m/z  
1076.50

Charge  
2+

Ion score  
99.9

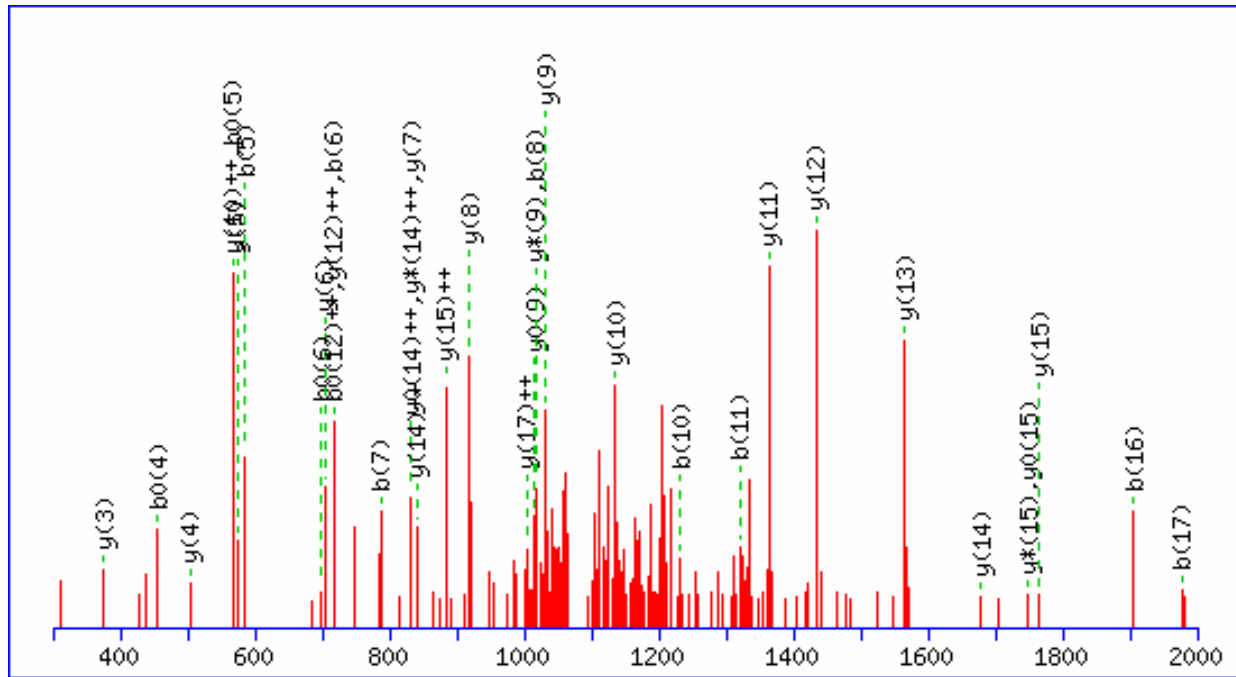

N-term : N-Acetyl (Protein)  
C8 : NEM (C)

| #  | b       | b <sup>++</sup> | b <sup>*</sup> | b <sup>*++</sup> | b <sup>0</sup> | b <sup>0++</sup> | Seq. | y       | y <sup>++</sup> | y <sup>*</sup> | y <sup>*++</sup> | y <sup>0</sup> | y <sup>0++</sup> | #  |
|----|---------|-----------------|----------------|------------------|----------------|------------------|------|---------|-----------------|----------------|------------------|----------------|------------------|----|
| 1  | 144.15  | 72.58           |                |                  | 126.13         | 63.57            | T    |         |                 |                |                  |                |                  | 18 |
| 2  | 257.31  | 129.16          |                |                  | 239.29         | 120.15           | L    | 2009.31 | 1005.16         | 1992.28        | 996.64           | 1991.29        | 996.15           | 17 |
| 3  | 386.42  | 193.71          |                |                  | 368.40         | 184.71           | E    | 1896.15 | 948.58          | 1879.12        | 940.06           | 1878.13        | 939.57           | 16 |
| 4  | 473.50  | 237.25          |                |                  | 455.48         | 228.25           | S    | 1767.03 | 884.02          | 1750.00        | 875.51           | 1749.02        | 875.01           | 15 |
| 5  | 586.66  | 293.83          |                |                  | 568.64         | 284.82           | I    | 1679.96 | 840.48          | 1662.93        | 831.97           | 1661.94        | 831.47           | 14 |
| 6  | 717.85  | 359.43          |                |                  | 699.84         | 350.42           | M    | 1566.80 | 783.90          | 1549.77        | 775.39           | 1548.78        | 774.90           | 13 |
| 7  | 788.93  | 394.97          |                |                  | 770.91         | 385.96           | A    | 1435.60 | 718.31          | 1418.57        | 709.79           | 1417.59        | 709.30           | 12 |
| 8  | 1017.20 | 509.10          |                |                  | 999.18         | 500.09           | C    | 1364.53 | 682.77          | 1347.49        | 674.25           | 1346.51        | 673.76           | 11 |
| 9  | 1120.34 | 560.67          |                |                  | 1102.32        | 551.67           | C    | 1136.26 | 568.63          | 1119.23        | 560.12           | 1118.24        | 559.62           | 10 |
| 10 | 1233.50 | 617.25          |                |                  | 1215.48        | 608.25           | L    | 1033.11 | 517.06          | 1016.08        | 508.55           | 1015.10        | 508.05           | 9  |
| 11 | 1320.58 | 660.79          |                |                  | 1302.56        | 651.78           | S    | 919.96  | 460.48          | 902.93         | 451.97           | 901.94         | 451.47           | 8  |
| 12 | 1449.69 | 725.35          |                |                  | 1431.67        | 716.34           | E    | 832.88  | 416.94          | 815.85         | 408.43           | 814.86         | 407.94           | 7  |
| 13 | 1578.80 | 789.91          |                |                  | 1560.79        | 780.90           | E    | 703.77  | 352.39          | 686.73         | 343.87           | 685.75         | 343.38           | 6  |
| 14 | 1649.88 | 825.44          |                |                  | 1631.87        | 816.44           | A    | 574.65  | 287.83          | 557.62         | 279.31           | 556.64         | 278.82           | 5  |
| 15 | 1778.05 | 889.53          | 1761.02        | 881.02           | 1760.04        | 880.52           | K    | 503.57  | 252.29          | 486.54         | 243.78           | 485.56         | 243.28           | 4  |
| 16 | 1907.17 | 954.09          | 1890.14        | 945.57           | 1889.15        | 945.08           | E    | 375.40  | 188.20          | 358.37         | 179.69           | 357.39         | 179.20           | 3  |
| 17 | 1978.25 | 989.63          | 1961.21        | 981.11           | 1960.23        | 980.62           | A    | 246.29  | 123.65          | 229.26         | 115.13           |                |                  | 2  |
| 18 |         |                 |                |                  |                |                  | R    | 175.21  | 88.11           | 158.18         | 79.59            |                |                  | 1  |

Gene Symbol  
GNAQ

Sequences  
TLESIMACCLSEEAKEAR

m/z  
1013.50

Charge  
2+

Ion score  
106.5

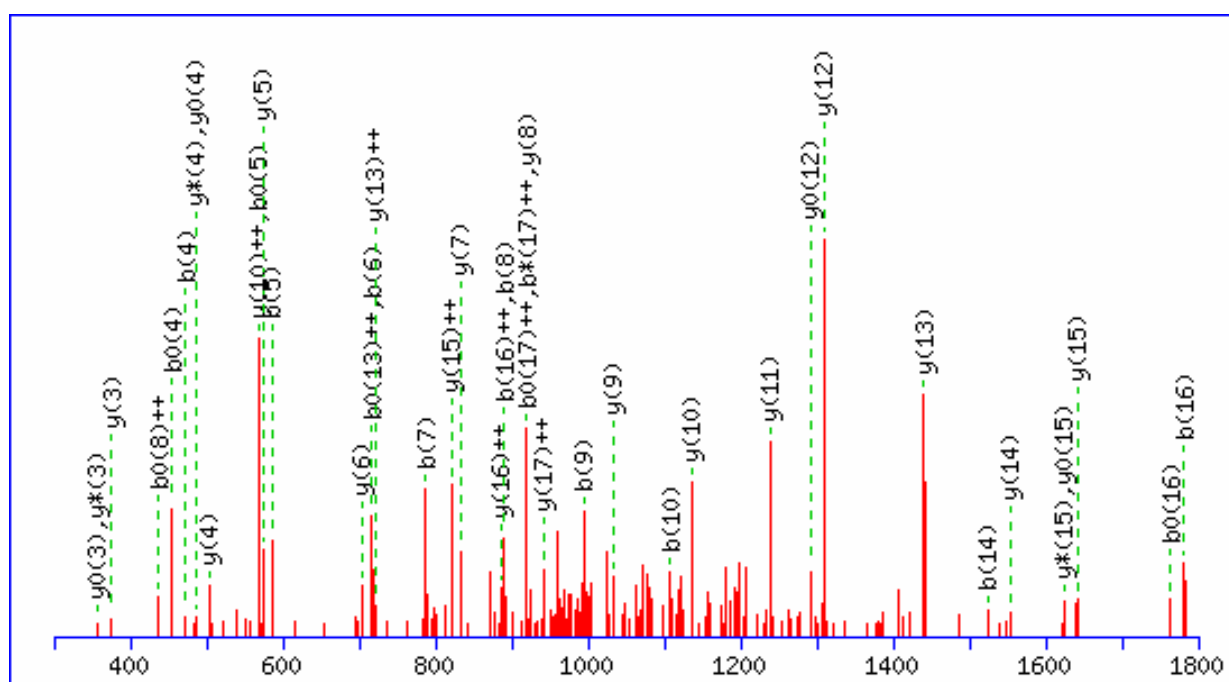

N-term : N-Acetyl (Protein)

| #  | b       | b <sup>++</sup> | b <sup>*</sup> | b <sup>***</sup> | b <sup>0</sup> | b <sup>0++</sup> | Seq. | y       | y <sup>++</sup> | y <sup>*</sup> | y <sup>***</sup> | y <sup>0</sup> | y <sup>0++</sup> | #  |
|----|---------|-----------------|----------------|------------------|----------------|------------------|------|---------|-----------------|----------------|------------------|----------------|------------------|----|
| 1  | 144.15  | 72.58           |                |                  | 126.13         | 63.57            | T    |         |                 |                |                  |                |                  | 18 |
| 2  | 257.31  | 129.16          |                |                  | 239.29         | 120.15           | L    | 1884.18 | 942.59          | 1867.15        | 934.08           | 1866.16        | 933.59           | 17 |
| 3  | 386.42  | 193.71          |                |                  | 368.40         | 184.71           | E    | 1771.02 | 886.02          | 1753.99        | 877.50           | 1753.01        | 877.01           | 16 |
| 4  | 473.50  | 237.25          |                |                  | 455.48         | 228.25           | S    | 1641.91 | 821.46          | 1624.88        | 812.94           | 1623.89        | 812.45           | 15 |
| 5  | 586.66  | 293.83          |                |                  | 568.64         | 284.82           | I    | 1554.83 | 777.92          | 1537.80        | 769.40           | 1536.82        | 768.91           | 14 |
| 6  | 717.85  | 359.43          |                |                  | 699.84         | 350.42           | M    | 1441.67 | 721.34          | 1424.64        | 712.83           | 1423.66        | 712.33           | 13 |
| 7  | 788.93  | 394.97          |                |                  | 770.91         | 385.96           | A    | 1310.48 | 655.74          | 1293.45        | 647.23           | 1292.46        | 646.74           | 12 |
| 8  | 892.07  | 446.54          |                |                  | 874.06         | 437.53           | C    | 1239.40 | 620.20          | 1222.37        | 611.69           | 1221.38        | 611.20           | 11 |
| 9  | 995.21  | 498.11          |                |                  | 977.20         | 489.10           | C    | 1136.26 | 568.63          | 1119.23        | 560.12           | 1118.24        | 559.62           | 10 |
| 10 | 1108.37 | 554.69          |                |                  | 1090.36        | 545.68           | L    | 1033.11 | 517.06          | 1016.08        | 508.55           | 1015.10        | 508.05           | 9  |
| 11 | 1195.45 | 598.23          |                |                  | 1177.43        | 589.22           | S    | 919.96  | 460.48          | 902.93         | 451.97           | 901.94         | 451.47           | 8  |
| 12 | 1324.56 | 662.79          |                |                  | 1306.55        | 653.78           | E    | 832.88  | 416.94          | 815.85         | 408.43           | 814.86         | 407.94           | 7  |
| 13 | 1453.68 | 727.34          |                |                  | 1435.66        | 718.34           | E    | 703.77  | 352.39          | 686.73         | 343.87           | 685.75         | 343.38           | 6  |
| 14 | 1524.76 | 762.88          |                |                  | 1506.74        | 753.87           | A    | 574.65  | 287.83          | 557.62         | 279.31           | 556.64         | 278.82           | 5  |
| 15 | 1652.93 | 826.97          | 1635.90        | 818.45           | 1634.91        | 817.96           | K    | 503.57  | 252.29          | 486.54         | 243.78           | 485.56         | 243.28           | 4  |
| 16 | 1782.04 | 891.52          | 1765.01        | 883.01           | 1764.03        | 882.52           | E    | 375.40  | 188.20          | 358.37         | 179.69           | 357.39         | 179.20           | 3  |
| 17 | 1853.12 | 927.06          | 1836.09        | 918.55           | 1835.10        | 918.06           | A    | 246.29  | 123.65          | 229.26         | 115.13           |                |                  | 2  |
| 18 |         |                 |                |                  |                |                  | R    | 175.21  | 88.11           | 158.18         | 79.59            |                |                  | 1  |

Gene Symbol  
GPCR5A

Sequences  
ATTVPDGC**R**NGLK

m/z  
687.64

Charge  
2+

Ion score  
52.8

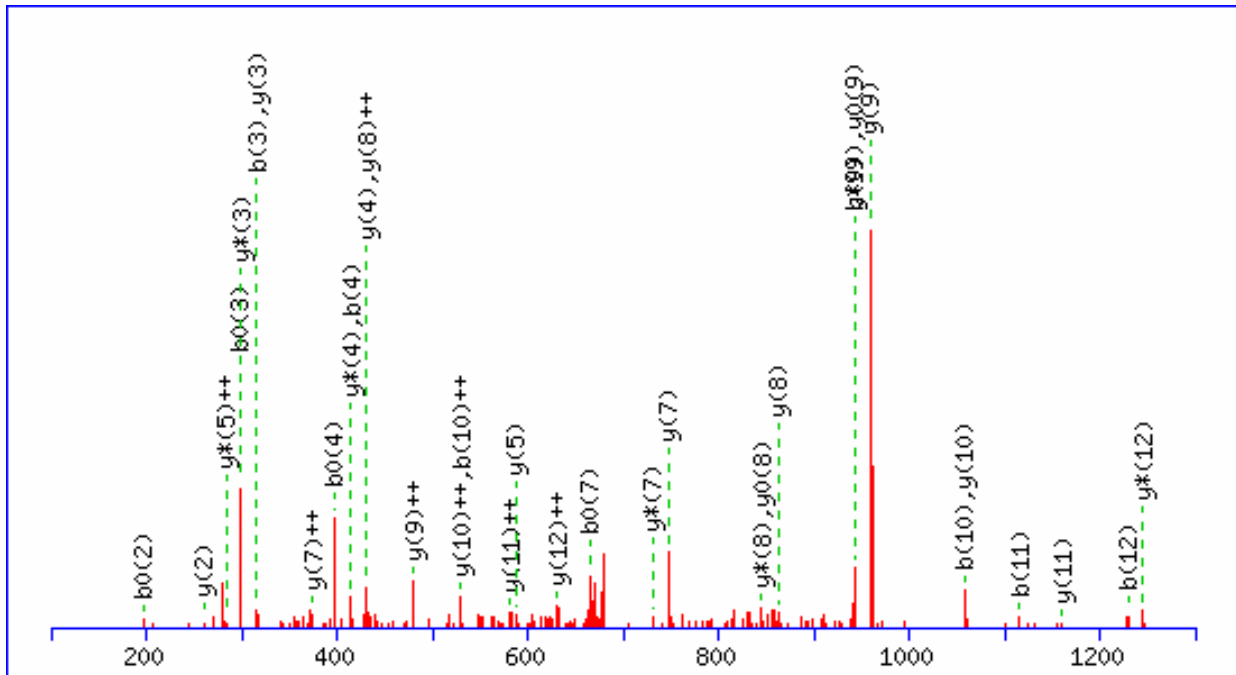

| #  | b       | b <sup>++</sup> | b <sup>*</sup> | b <sup>*++</sup> | b <sup>0</sup> | b <sup>0++</sup> | Seq. | y       | y <sup>++</sup> | y <sup>*</sup> | y <sup>*++</sup> | y <sup>0</sup> | y <sup>0++</sup> | #  |
|----|---------|-----------------|----------------|------------------|----------------|------------------|------|---------|-----------------|----------------|------------------|----------------|------------------|----|
| 1  | 114.12  | 57.57           |                |                  |                |                  | A    |         |                 |                |                  |                |                  | 13 |
| 2  | 215.23  | 108.12          |                |                  | 197.21         | 99.11            | T    | 1261.43 | 631.22          | 1244.40        | 622.70           | 1243.41        | 622.21           | 12 |
| 3  | 316.33  | 158.67          |                |                  | 298.32         | 149.66           | T    | 1160.32 | 580.67          | 1143.29        | 572.15           | 1142.31        | 571.66           | 11 |
| 4  | 415.46  | 208.23          |                |                  | 397.45         | 199.23           | V    | 1059.22 | 530.11          | 1042.19        | 521.60           | 1041.21        | 521.11           | 10 |
| 5  | 512.58  | 256.79          |                |                  | 494.56         | 247.78           | P    | 960.09  | 480.55          | 943.06         | 472.03           | 942.07         | 471.54           | 9  |
| 6  | 627.66  | 314.34          |                |                  | 609.65         | 305.33           | D    | 862.97  | 431.99          | 845.94         | 423.48           | 844.96         | 422.98           | 8  |
| 7  | 684.72  | 342.86          |                |                  | 666.70         | 333.85           | G    | 747.89  | 374.45          | 730.86         | 365.93           |                |                  | 7  |
| 8  | 787.86  | 394.43          |                |                  | 769.84         | 385.43           | C    | 690.84  | 345.92          | 673.81         | 337.41           |                |                  | 6  |
| 9  | 944.04  | 472.53          | 927.01         | 464.01           | 926.03         | 463.52           | R    | 587.69  | 294.35          | 570.66         | 285.84           |                |                  | 5  |
| 10 | 1058.15 | 529.58          | 1041.12        | 521.06           | 1040.13        | 520.57           | N    | 431.51  | 216.26          | 414.48         | 207.74           |                |                  | 4  |
| 11 | 1115.20 | 558.10          | 1098.17        | 549.59           | 1097.18        | 549.10           | G    | 317.40  | 159.21          | 300.37         | 150.69           |                |                  | 3  |
| 12 | 1228.36 | 614.68          | 1211.32        | 606.17           | 1210.34        | 605.67           | L    | 260.35  | 130.68          | 243.32         | 122.17           |                |                  | 2  |
| 13 |         |                 |                |                  |                |                  | K    | 147.20  | 74.10           | 130.16         | 65.59            |                |                  | 1  |

Gene Symbol  
GPCR5A

Sequences  
QRNPMDYPVEDAF**C**KPQLVK

m/z  
793.58

Charge  
3+

Ion score  
83.2

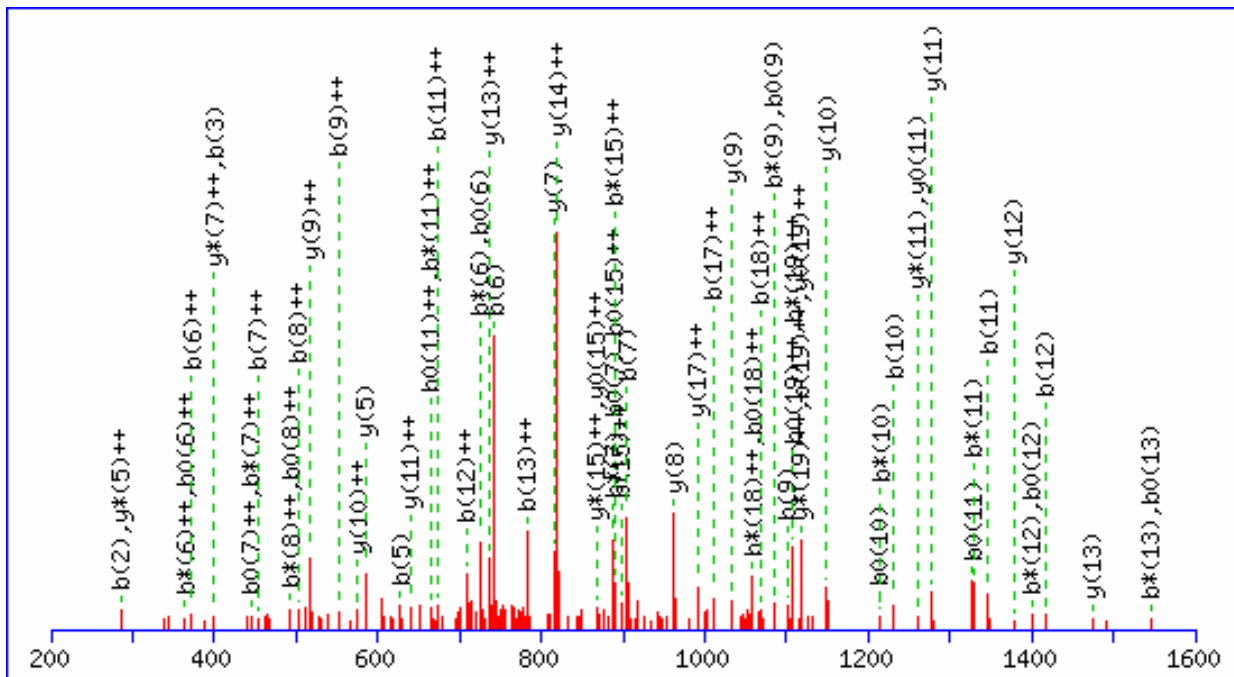

| #  | b              | b <sup>++</sup> | b <sup>+</sup> | b <sup>+++</sup> | b <sup>0</sup> | b <sup>0++</sup> | Seq. | y              | y <sup>++</sup> | y <sup>+</sup> | y <sup>+++</sup> | y <sup>0</sup> | y <sup>0++</sup> | #  |
|----|----------------|-----------------|----------------|------------------|----------------|------------------|------|----------------|-----------------|----------------|------------------|----------------|------------------|----|
| 1  | 129.14         | 65.07           | 112.11         | 56.56            |                |                  | Q    |                |                 |                |                  |                |                  | 20 |
| 2  | <b>285.32</b>  | 143.17          | 268.29         | 134.65           |                |                  | R    | 2251.60        | 1126.31         | 2234.57        | <b>1117.79</b>   | 2233.59        | <b>1117.30</b>   | 19 |
| 3  | <b>399.43</b>  | 200.22          | 382.39         | 191.70           |                |                  | N    | 2095.42        | 1048.21         | 2078.39        | 1039.70          | 2077.40        | 1039.21          | 18 |
| 4  | 496.54         | 248.77          | 479.51         | 240.26           |                |                  | P    | 1981.32        | <b>991.16</b>   | 1964.28        | 982.65           | 1963.30        | 982.15           | 17 |
| 5  | <b>627.74</b>  | 314.37          | 610.71         | 305.86           |                |                  | M    | 1884.20        | 942.60          | 1867.17        | 934.09           | 1866.18        | 933.60           | 16 |
| 6  | <b>742.82</b>  | <b>371.92</b>   | <b>725.79</b>  | <b>363.40</b>    | <b>724.81</b>  | <b>362.91</b>    | D    | 1753.00        | 877.01          | 1735.97        | <b>868.49</b>    | 1734.99        | <b>868.00</b>    | 15 |
| 7  | <b>906.00</b>  | <b>453.50</b>   | <b>888.97</b>  | <b>444.99</b>    | <b>887.98</b>  | <b>444.50</b>    | Y    | 1637.92        | <b>819.46</b>   | 1620.89        | 810.95           | 1619.90        | 810.45           | 14 |
| 8  | 1003.11        | <b>502.06</b>   | 986.08         | <b>493.55</b>    | 985.10         | <b>493.05</b>    | P    | <b>1474.74</b> | <b>737.88</b>   | 1457.71        | 729.36           | 1456.73        | 728.87           | 13 |
| 9  | <b>1102.24</b> | <b>551.63</b>   | <b>1085.21</b> | 543.11           | <b>1084.23</b> | 542.62           | V    | <b>1377.63</b> | 689.32          | 1360.60        | 680.80           | 1359.61        | 680.31           | 12 |
| 10 | <b>1231.36</b> | 616.18          | <b>1214.33</b> | 607.67           | <b>1213.34</b> | 607.18           | E    | <b>1278.50</b> | <b>639.75</b>   | <b>1261.47</b> | 631.24           | <b>1260.48</b> | 630.74           | 11 |
| 11 | <b>1346.45</b> | <b>673.73</b>   | <b>1329.41</b> | <b>665.21</b>    | <b>1328.43</b> | <b>664.72</b>    | D    | <b>1149.38</b> | <b>575.20</b>   | 1132.35        | 566.68           | 1131.37        | 566.19           | 10 |
| 12 | <b>1417.52</b> | <b>709.27</b>   | <b>1400.49</b> | 700.75           | <b>1399.51</b> | 700.26           | A    | <b>1034.30</b> | <b>517.65</b>   | 1017.27        | 509.14           |                |                  | 9  |
| 13 | 1564.70        | <b>782.85</b>   | <b>1547.67</b> | 774.34           | <b>1546.68</b> | 773.84           | F    | <b>963.22</b>  | 482.11          | 946.19         | 473.60           |                |                  | 8  |
| 14 | 1667.84        | 834.42          | 1650.81        | 825.91           | 1649.82        | 825.42           | C    | <b>816.04</b>  | 408.53          | 799.01         | <b>400.01</b>    |                |                  | 7  |
| 15 | 1796.01        | <b>898.51</b>   | 1778.98        | <b>889.99</b>    | 1778.00        | <b>889.50</b>    | K    | 712.90         | 356.95          | 695.87         | 348.44           |                |                  | 6  |
| 16 | 1893.13        | 947.07          | 1876.10        | 938.55           | 1875.11        | 938.06           | P    | <b>584.73</b>  | 292.87          | 567.70         | <b>284.35</b>    |                |                  | 5  |
| 17 | 2021.26        | <b>1011.13</b>  | 2004.23        | 1002.62          | 2003.24        | 1002.12          | Q    | 487.61         | 244.31          | 470.58         | 235.80           |                |                  | 4  |
| 18 | 2134.41        | <b>1067.71</b>  | 2117.38        | <b>1059.20</b>   | 2116.40        | <b>1058.70</b>   | L    | 359.48         | 180.25          | 342.45         | 171.73           |                |                  | 3  |
| 19 | 2233.55        | <b>1117.28</b>  | 2216.51        | <b>1108.76</b>   | 2215.53        | <b>1108.27</b>   | V    | 246.33         | 123.67          | 229.30         | 115.15           |                |                  | 2  |
| 20 |                |                 |                |                  |                |                  | K    | 147.20         | 74.10           | 130.17         | 65.59            |                |                  | 1  |

Gene Symbol  
HLA-B/C

Sequences  
MYG**C**DLGPDGR

m/z  
593.03

Charge  
2+

Ion score  
71.4

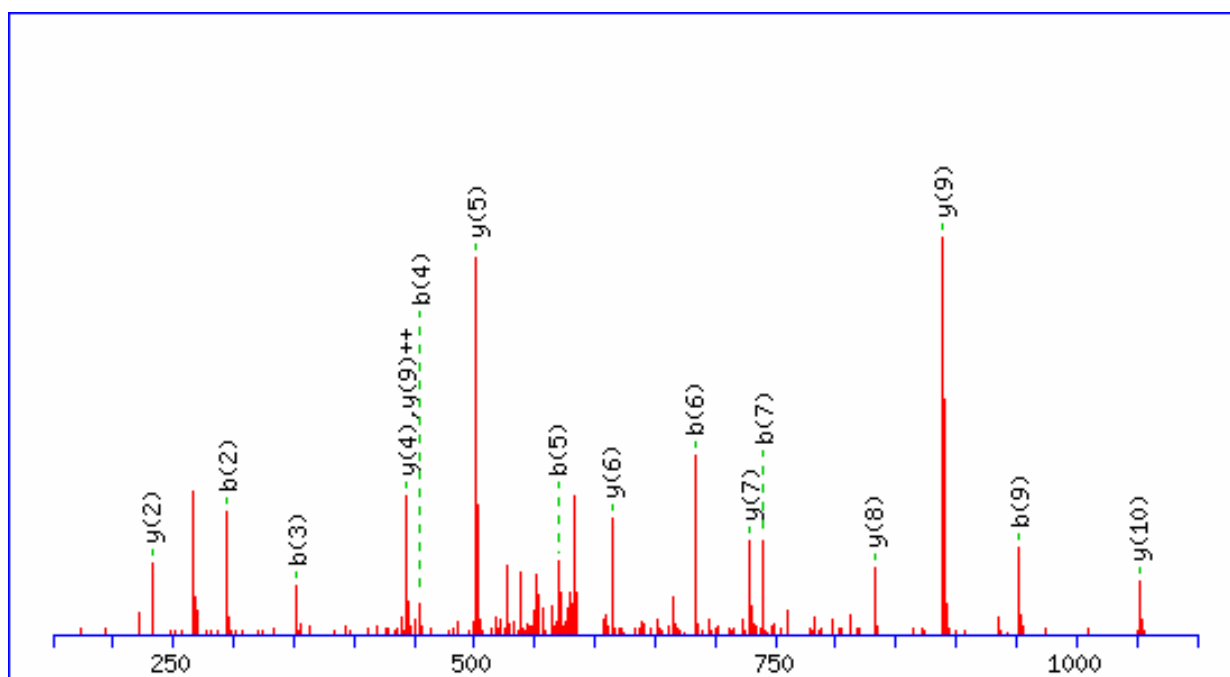

| #  | b       | b <sup>++</sup> | b <sup>0</sup> | b <sup>0++</sup> | Seq. | y       | y <sup>++</sup> | y <sup>*</sup> | y <sup>*++</sup> | y <sup>0</sup> | y <sup>0++</sup> | #  |
|----|---------|-----------------|----------------|------------------|------|---------|-----------------|----------------|------------------|----------------|------------------|----|
| 1  | 132.20  | 66.61           |                |                  | M    |         |                 |                |                  |                |                  | 11 |
| 2  | 295.38  | 148.19          |                |                  | Y    | 1053.13 | 527.07          | 1036.10        | 518.55           | 1035.11        | 518.06           | 10 |
| 3  | 352.43  | 176.72          |                |                  | G    | 889.95  | 445.48          | 872.92         | 436.97           | 871.94         | 436.47           | 9  |
| 4  | 455.57  | 228.29          |                |                  | C    | 832.90  | 416.95          | 815.87         | 408.44           | 814.89         | 407.95           | 8  |
| 5  | 570.66  | 285.83          | 552.64         | 276.83           | D    | 729.76  | 365.38          | 712.73         | 356.87           | 711.74         | 356.38           | 7  |
| 6  | 683.82  | 342.41          | 665.80         | 333.40           | L    | 614.67  | 307.84          | 597.64         | 299.32           | 596.66         | 298.83           | 6  |
| 7  | 740.87  | 370.94          | 722.85         | 361.93           | G    | 501.51  | 251.26          | 484.48         | 242.75           | 483.50         | 242.25           | 5  |
| 8  | 837.98  | 419.50          | 819.97         | 410.49           | P    | 444.46  | 222.74          | 427.43         | 214.22           | 426.45         | 213.73           | 4  |
| 9  | 953.07  | 477.04          | 935.06         | 468.03           | D    | 347.35  | 174.18          | 330.32         | 165.66           | 329.33         | 165.17           | 3  |
| 10 | 1010.12 | 505.56          | 992.11         | 496.56           | G    | 232.26  | 116.63          | 215.23         | 108.12           |                |                  | 2  |
| 11 |         |                 |                |                  | R    | 175.21  | 88.11           | 158.18         | 79.59            |                |                  | 1  |



Gene Symbol  
HPCA

Sequences  
LLQCDPSSASQF

m/z  
648.62

Charge  
2+

Ion score  
75.9

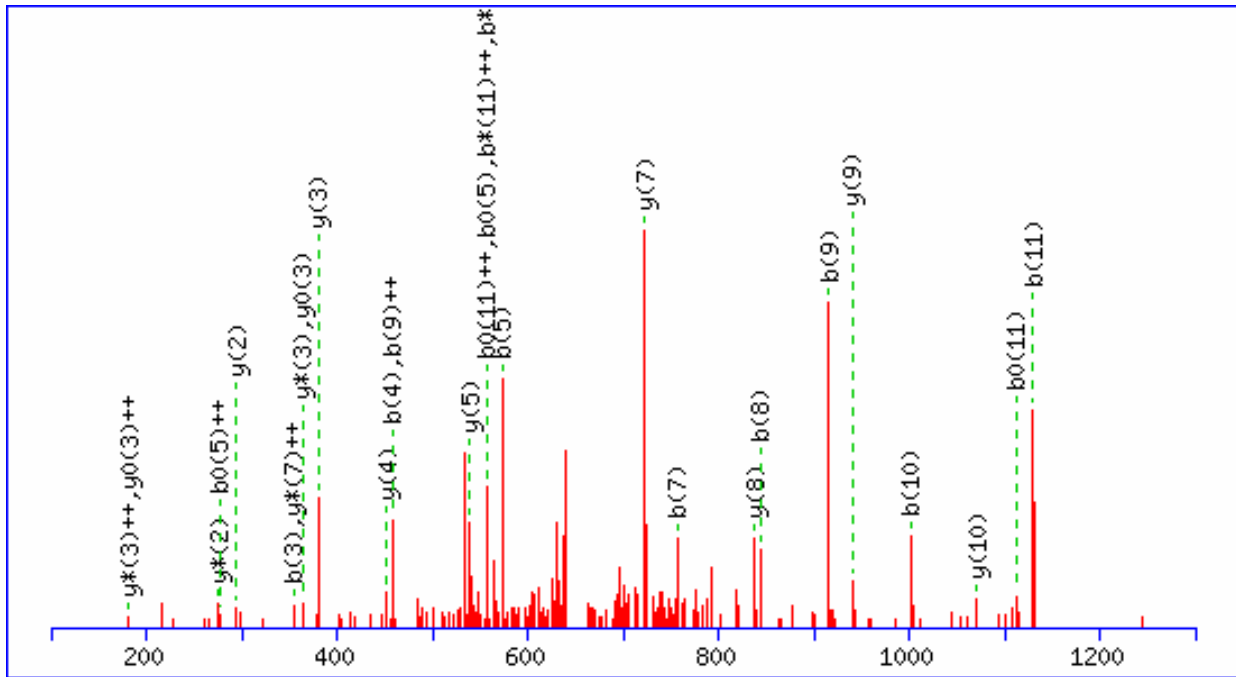

| #  | b       | b <sup>++</sup> | b <sup>+</sup> | b <sup>*++</sup> | b <sup>0</sup> | b <sup>0++</sup> | Seq. | y       | y <sup>++</sup> | y <sup>+</sup> | y <sup>*++</sup> | y <sup>0</sup> | y <sup>0++</sup> | #  |
|----|---------|-----------------|----------------|------------------|----------------|------------------|------|---------|-----------------|----------------|------------------|----------------|------------------|----|
| 1  | 114.17  | 57.59           |                |                  |                |                  | L    |         |                 |                |                  |                |                  | 12 |
| 2  | 227.32  | 114.17          |                |                  |                |                  | L    | 1183.27 | 592.14          | 1166.24        | 583.62           | 1165.25        | 583.13           | 11 |
| 3  | 355.45  | 178.23          | 338.42         | 169.71           |                |                  | Q    | 1070.11 | 535.56          | 1053.08        | 527.04           | 1052.10        | 526.55           | 10 |
| 4  | 458.60  | 229.80          | 441.56         | 221.29           |                |                  | C    | 941.98  | 471.49          | 924.95         | 462.98           | 923.97         | 462.49           | 9  |
| 5  | 573.68  | 287.35          | 556.65         | 278.83           | 555.67         | 278.34           | D    | 838.84  | 419.92          | 821.81         | 411.41           | 820.82         | 410.92           | 8  |
| 6  | 670.80  | 335.90          | 653.77         | 327.39           | 652.78         | 326.90           | P    | 723.75  | 362.38          | 706.72         | 353.86           | 705.74         | 353.37           | 7  |
| 7  | 757.88  | 379.44          | 740.84         | 370.93           | 739.86         | 370.43           | S    | 626.64  | 313.82          | 609.61         | 305.31           | 608.62         | 304.81           | 6  |
| 8  | 844.95  | 422.98          | 827.92         | 414.46           | 826.94         | 413.97           | S    | 539.56  | 270.28          | 522.53         | 261.77           | 521.54         | 261.28           | 5  |
| 9  | 916.03  | 458.52          | 899.00         | 450.00           | 898.02         | 449.51           | A    | 452.48  | 226.74          | 435.45         | 218.23           | 434.47         | 217.74           | 4  |
| 10 | 1003.11 | 502.06          | 986.08         | 493.54           | 985.09         | 493.05           | S    | 381.40  | 191.21          | 364.37         | 182.69           | 363.39         | 182.20           | 3  |
| 11 | 1131.24 | 566.12          | 1114.21        | 557.61           | 1113.22        | 557.11           | Q    | 294.33  | 147.67          | 277.30         | 139.15           |                |                  | 2  |
| 12 |         |                 |                |                  |                |                  | F    | 166.20  | 83.60           |                |                  |                |                  | 1  |

Gene Symbol  
ITGA3

Sequences  
SETVLTCATGR

m/z  
569.49

Charge  
2+

Ion score  
87.7

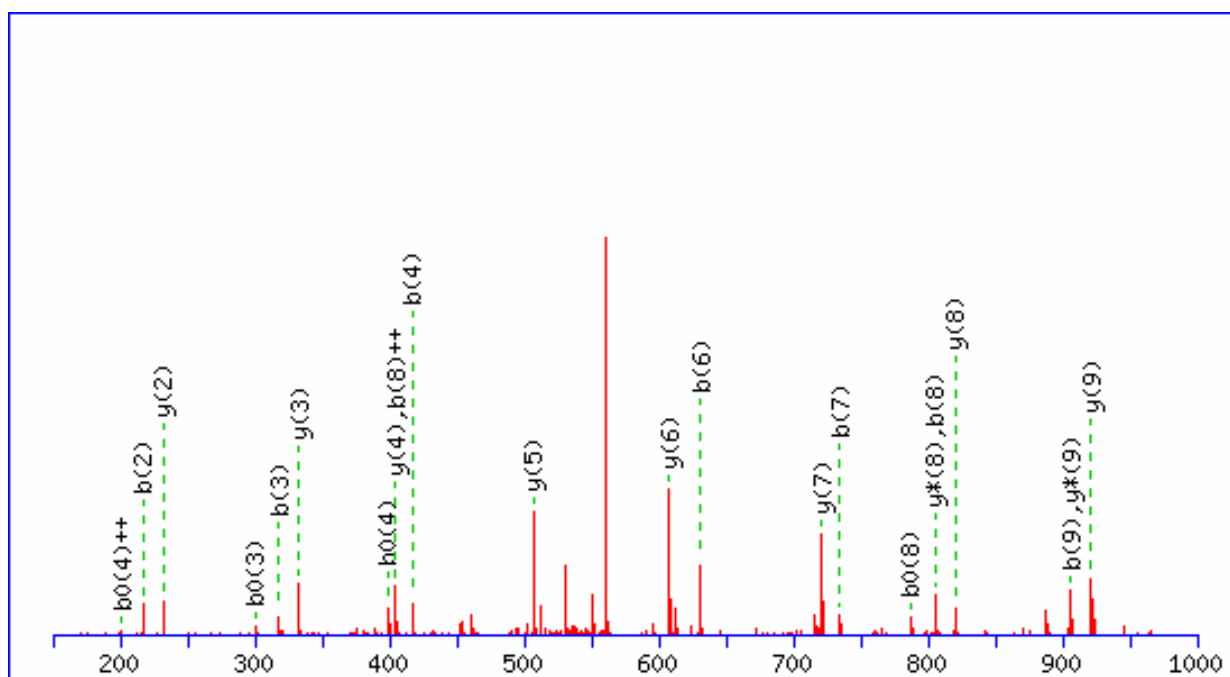

| #  | b             | b <sup>++</sup> | b <sup>0</sup> | b <sup>0++</sup> | Seq. | y             | y <sup>++</sup> | y <sup>*</sup> | y <sup>*++</sup> | y <sup>0</sup> | y <sup>0++</sup> | #  |
|----|---------------|-----------------|----------------|------------------|------|---------------|-----------------|----------------|------------------|----------------|------------------|----|
| 1  | 88.09         | 44.55           | 70.07          | 35.54            | S    |               |                 |                |                  |                |                  | 11 |
| 2  | <b>217.20</b> | 109.10          | 199.18         | 100.10           | E    | 1051.20       | 526.10          | 1034.16        | 517.59           | 1033.18        | 517.09           | 10 |
| 3  | <b>318.30</b> | 159.66          | <b>300.29</b>  | 150.65           | T    | <b>922.08</b> | 461.54          | <b>905.05</b>  | 453.03           | 904.07         | 452.54           | 9  |
| 4  | <b>417.43</b> | 209.22          | <b>399.42</b>  | <b>200.21</b>    | V    | <b>820.98</b> | 410.99          | <b>803.95</b>  | 402.48           | 802.96         | 401.99           | 8  |
| 5  | 530.59        | 265.80          | 512.58         | 256.79           | L    | <b>721.85</b> | 361.43          | 704.82         | 352.91           | 703.83         | 352.42           | 7  |
| 6  | <b>631.70</b> | 316.35          | 613.68         | 307.34           | T    | <b>608.69</b> | 304.85          | 591.66         | 296.33           | 590.67         | 295.84           | 6  |
| 7  | <b>734.84</b> | 367.92          | 716.82         | 358.92           | C    | <b>507.58</b> | 254.30          | 490.55         | 245.78           | 489.57         | 245.29           | 5  |
| 8  | <b>805.92</b> | <b>403.46</b>   | <b>787.90</b>  | 394.45           | A    | <b>404.44</b> | 202.72          | 387.41         | 194.21           | 386.43         | 193.72           | 4  |
| 9  | <b>907.02</b> | 454.01          | 889.01         | 445.01           | T    | <b>333.36</b> | 167.19          | 316.33         | 158.67           | 315.35         | 158.18           | 3  |
| 10 | 964.07        | 482.54          | 946.06         | 473.53           | G    | <b>232.26</b> | 116.63          | 215.23         | 108.12           |                |                  | 2  |
| 11 |               |                 |                |                  | R    | 175.21        | 88.11           | 158.18         | 79.59            |                |                  | 1  |

Gene Symbol Sequences m/z Charge Ion score  
 JUP VREAMCPGVSGEDSLLLATQVEGQATNLQR 1087.61 3+ 82.3

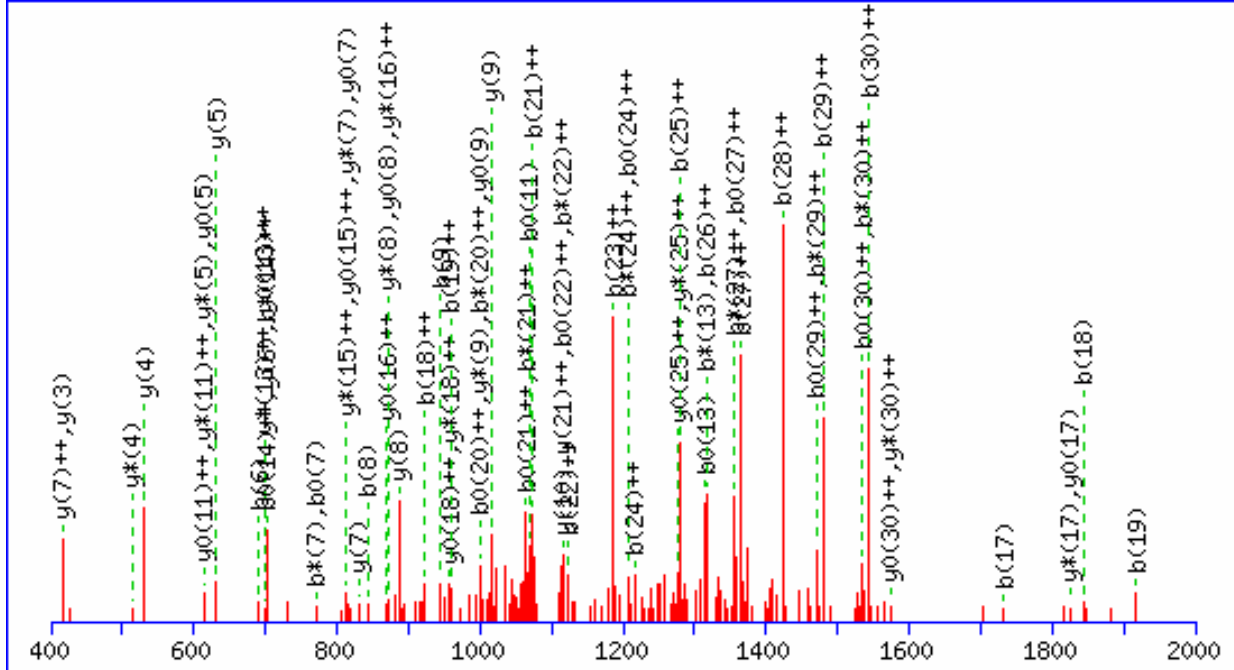

| #  | b              | b <sup>++</sup> | b <sup>+</sup> | b <sup>+++</sup> | b <sup>0</sup> | b <sup>0++</sup> | Seq. | y              | y <sup>++</sup> | y <sup>+</sup> | y <sup>+++</sup> | y <sup>0</sup> | y <sup>0++</sup> | #  |
|----|----------------|-----------------|----------------|------------------|----------------|------------------|------|----------------|-----------------|----------------|------------------|----------------|------------------|----|
| 1  | 100.14         | 50.57           |                |                  |                |                  | V    |                |                 |                |                  |                |                  | 31 |
| 2  | 256.32         | 128.67          | 239.29         | 120.15           |                |                  | R    | 3162.49        | 1581.75         | 3145.46        | <b>1573.23</b>   | 3144.47        | <b>1572.74</b>   | 30 |
| 3  | 385.44         | 193.22          | 368.41         | 184.71           | 367.42         | 184.22           | E    | 3006.30        | 1503.66         | 2989.27        | 1495.14          | 2988.29        | 1494.65          | 29 |
| 4  | 456.52         | 228.76          | 439.49         | 220.25           | 438.50         | 219.75           | A    | 2877.19        | 1439.10         | 2860.16        | 1430.58          | 2859.17        | 1430.09          | 28 |
| 5  | 587.71         | 294.36          | 570.68         | 285.85           | 569.70         | 285.35           | M    | 2806.11        | 1403.56         | 2789.08        | 1395.04          | 2788.10        | 1394.55          | 27 |
| 6  | <b>690.86</b>  | 345.93          | 673.83         | 337.42           | 672.84         | 336.92           | C    | 2674.91        | 1337.96         | 2657.88        | 1329.45          | 2656.90        | 1328.95          | 26 |
| 7  | 787.97         | 394.49          | <b>770.94</b>  | 385.97           | <b>769.96</b>  | 385.48           | P    | 2571.77        | 1286.39         | 2554.74        | <b>1277.87</b>   | 2553.76        | <b>1277.38</b>   | 25 |
| 8  | <b>845.02</b>  | 423.02          | 827.99         | 414.50           | 827.01         | 414.01           | G    | 2474.66        | 1237.83         | 2457.63        | 1229.32          | 2456.64        | 1228.82          | 24 |
| 9  | <b>944.15</b>  | 472.58          | 927.12         | 464.07           | 926.14         | 463.57           | V    | 2417.61        | 1209.31         | 2400.57        | 1200.79          | 2399.59        | 1200.30          | 23 |
| 10 | 1031.23        | 516.12          | 1014.20        | 507.60           | 1013.22        | 507.11           | S    | 2318.47        | 1159.74         | 2301.44        | 1151.23          | 2300.46        | 1150.73          | 22 |
| 11 | 1088.28        | 544.64          | 1071.25        | 536.13           | <b>1070.27</b> | 535.64           | G    | 2231.40        | <b>1116.20</b>  | 2214.37        | 1107.69          | 2213.38        | 1107.19          | 21 |
| 12 | 1217.40        | 609.20          | 1200.37        | 600.69           | 1199.38        | 600.19           | E    | 2174.35        | 1087.68         | 2157.32        | 1079.16          | 2156.33        | 1078.67          | 20 |
| 13 | 1332.48        | 666.75          | <b>1315.45</b> | 658.23           | <b>1314.47</b> | 657.74           | D    | 2045.23        | 1023.12         | 2028.20        | 1014.60          | 2027.22        | 1014.11          | 19 |
| 14 | 1419.56        | 710.28          | 1402.53        | <b>701.77</b>    | 1401.55        | <b>701.28</b>    | S    | 1930.14        | 965.58          | 1913.11        | <b>957.06</b>    | 1912.13        | <b>956.57</b>    | 18 |
| 15 | 1506.64        | 753.82          | 1489.61        | 745.31           | 1488.62        | 744.82           | S    | 1843.07        | 922.04          | <b>1826.04</b> | 913.52           | <b>1825.05</b> | 913.03           | 17 |
| 16 | 1619.80        | 810.40          | 1602.76        | 801.89           | 1601.78        | 801.39           | L    | 1755.99        | 878.50          | 1738.96        | <b>869.98</b>    | 1737.97        | <b>869.49</b>    | 16 |
| 17 | <b>1732.95</b> | 866.98          | 1715.92        | 858.47           | 1714.94        | 857.97           | L    | 1642.83        | 821.92          | 1625.80        | <b>813.40</b>    | 1624.82        | <b>812.91</b>    | 15 |
| 18 | <b>1846.11</b> | <b>923.56</b>   | 1829.08        | 915.04           | 1828.10        | 914.55           | L    | 1529.67        | 765.34          | 1512.64        | 756.83           | 1511.66        | 756.33           | 14 |
| 19 | <b>1917.19</b> | <b>959.10</b>   | 1900.16        | 950.58           | 1899.17        | 950.09           | A    | 1416.52        | 708.76          | 1399.49        | <b>700.25</b>    | 1398.50        | <b>699.75</b>    | 13 |
| 20 | 2018.29        | 1009.65         | 2001.26        | <b>1001.13</b>   | 2000.28        | <b>1000.64</b>   | T    | 1345.44        | 673.22          | 1328.41        | 664.71           | 1327.42        | 664.22           | 12 |
| 21 | 2146.42        | <b>1073.71</b>  | 2129.39        | <b>1065.20</b>   | 2128.41        | <b>1064.71</b>   | Q    | 1244.33        | 622.67          | 1227.30        | <b>614.16</b>    | 1226.32        | <b>613.66</b>    | 11 |
| 22 | 2245.55        | <b>1123.28</b>  | 2228.52        | <b>1114.77</b>   | 2227.54        | <b>1114.27</b>   | V    | <b>1116.21</b> | 558.61          | 1099.18        | 550.09           | 1098.19        | 549.60           | 10 |
| 23 | 2374.67        | <b>1187.84</b>  | 2357.64        | 1179.32          | 2356.65        | 1178.83          | E    | <b>1017.07</b> | 509.04          | <b>1000.04</b> | 500.53           | <b>999.06</b>  | 500.03           | 9  |
| 24 | 2431.72        | <b>1216.36</b>  | 2414.69        | <b>1207.85</b>   | 2413.70        | <b>1207.36</b>   | G    | <b>887.96</b>  | 444.48          | <b>870.93</b>  | 435.97           | <b>869.95</b>  | 435.48           | 8  |
| 25 | 2559.85        | <b>1280.43</b>  | 2542.82        | 1271.91          | 2541.83        | 1271.42          | Q    | <b>830.91</b>  | <b>415.96</b>   | <b>813.88</b>  | 407.44           | <b>812.89</b>  | 406.95           | 7  |
| 26 | 2630.93        | <b>1315.97</b>  | 2613.89        | 1307.45          | 2612.91        | 1306.96          | A    | <b>702.78</b>  | 351.89          | 685.75         | 343.38           | 684.76         | 342.89           | 6  |
| 27 | 2732.03        | <b>1366.52</b>  | 2715.00        | <b>1358.00</b>   | 2714.01        | <b>1357.51</b>   | T    | <b>631.70</b>  | 316.36          | <b>614.67</b>  | 307.84           | <b>613.69</b>  | 307.35           | 5  |
| 28 | 2846.13        | <b>1423.57</b>  | 2829.10        | 1415.05          | 2828.12        | 1414.56          | N    | <b>530.60</b>  | 265.80          | <b>513.57</b>  | 257.29           |                |                  | 4  |
| 29 | 2959.29        | <b>1480.15</b>  | 2942.26        | <b>1471.63</b>   | 2941.27        | <b>1471.14</b>   | L    | <b>416.50</b>  | 208.75          | 399.47         | 200.24           |                |                  | 3  |
| 30 | 3087.42        | <b>1544.21</b>  | 3070.39        | <b>1535.70</b>   | 3069.40        | <b>1535.21</b>   | Q    | 303.34         | 152.17          | 286.31         | 143.66           |                |                  | 2  |
| 31 |                |                 |                |                  |                |                  | R    | 175.21         | 88.11           | 158.18         | 79.59            |                |                  | 1  |

Gene Symbol  
KCNK1

Sequences  
MLQSLAGSS**C**VR

m/z  
626.47

Charge  
2+

Ion score  
86.3

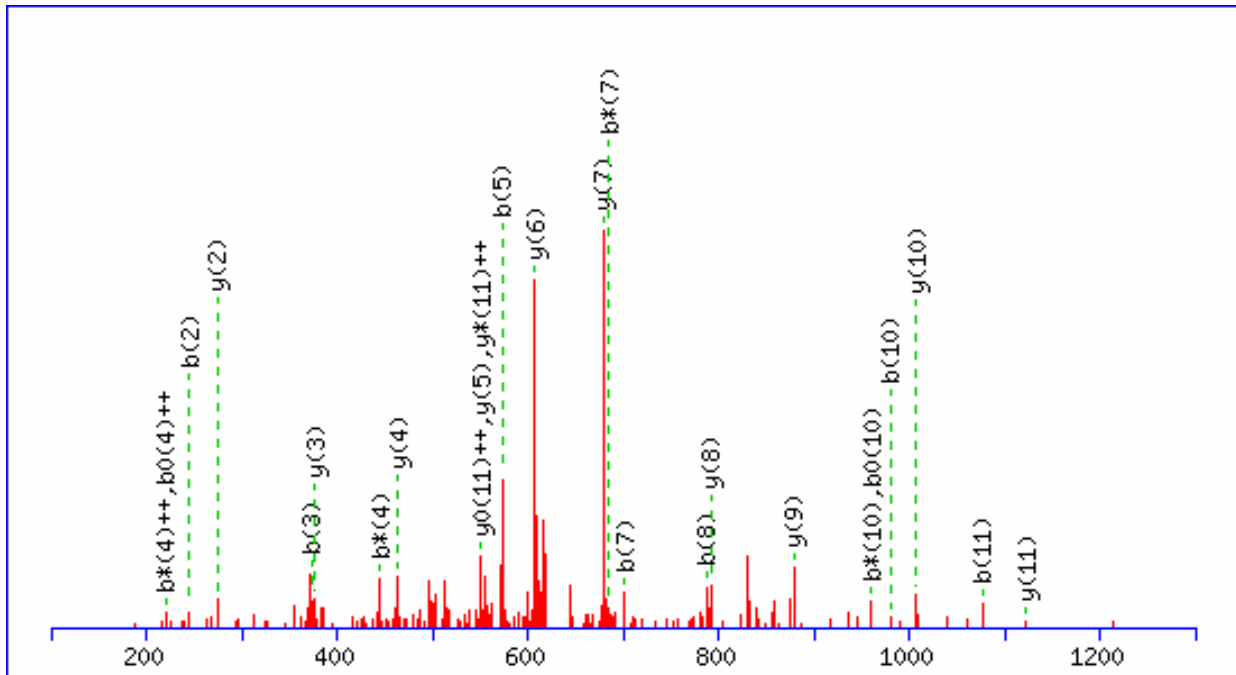

| #  | b              | b <sup>++</sup> | b <sup>*</sup> | b <sup>+++</sup> | b <sup>0</sup> | b <sup>0++</sup> | Seq. | y              | y <sup>++</sup> | y <sup>*</sup> | y <sup>+++</sup> | y <sup>0</sup> | y <sup>0++</sup> | #  |
|----|----------------|-----------------|----------------|------------------|----------------|------------------|------|----------------|-----------------|----------------|------------------|----------------|------------------|----|
| 1  | 132.20         | 66.61           |                |                  |                |                  | M    |                |                 |                |                  |                |                  | 12 |
| 2  | <b>245.36</b>  | 123.18          |                |                  |                |                  | L    | <b>1121.29</b> | 561.15          | 1104.26        | <b>552.63</b>    | 1103.27        | <b>552.14</b>    | 11 |
| 3  | <b>373.49</b>  | 187.25          | 356.46         | 178.73           |                |                  | Q    | <b>1008.13</b> | 504.57          | 991.10         | 496.05           | 990.12         | 495.56           | 10 |
| 4  | 460.57         | 230.79          | <b>443.54</b>  | <b>222.27</b>    | 442.55         | <b>221.78</b>    | S    | <b>880.00</b>  | 440.50          | 862.97         | 431.99           | 861.99         | 431.50           | 9  |
| 5  | <b>573.73</b>  | 287.37          | 556.70         | 278.85           | 555.71         | 278.36           | L    | <b>792.92</b>  | 396.97          | 775.89         | 388.45           | 774.91         | 387.96           | 8  |
| 6  | 644.80         | 322.91          | 627.77         | 314.39           | 626.79         | 313.90           | A    | <b>679.77</b>  | 340.39          | 662.74         | 331.87           | 661.75         | 331.38           | 7  |
| 7  | <b>701.85</b>  | 351.43          | <b>684.82</b>  | 342.92           | 683.84         | 342.42           | G    | <b>608.69</b>  | 304.85          | 591.66         | 296.33           | 590.67         | 295.84           | 6  |
| 8  | <b>788.93</b>  | 394.97          | 771.90         | 386.45           | 770.92         | 385.96           | S    | <b>551.64</b>  | 276.32          | 534.61         | 267.81           | 533.62         | 267.32           | 5  |
| 9  | 876.01         | 438.51          | 858.98         | 429.99           | 857.99         | 429.50           | S    | <b>464.56</b>  | 232.78          | 447.53         | 224.27           | 446.54         | 223.78           | 4  |
| 10 | <b>979.15</b>  | 490.08          | <b>962.12</b>  | 481.56           | <b>961.14</b>  | 481.07           | C    | <b>377.48</b>  | 189.25          | 360.45         | 180.73           |                |                  | 3  |
| 11 | <b>1078.28</b> | 539.65          | 1061.25        | 531.13           | 1060.27        | 530.64           | V    | <b>274.34</b>  | 137.67          | 257.31         | 129.16           |                |                  | 2  |
| 12 |                |                 |                |                  |                |                  | R    | 175.21         | 88.11           | 158.18         | 79.59            |                |                  | 1  |

Gene Symbol  
LGALS1

Sequences  
SFVLNLGKDSNNL**C**LHFNPR

m/z  
763.90

Charge  
3+

Ion score  
90.5

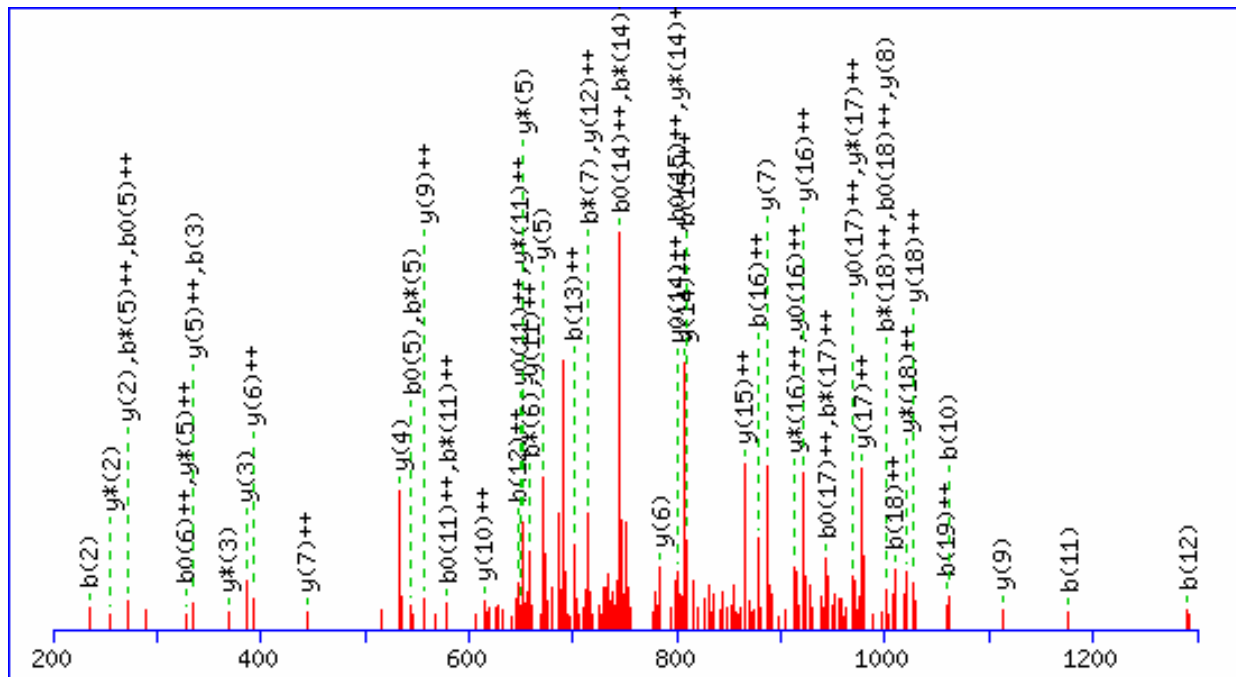

| #  | b              | b <sup>++</sup> | b <sup>+</sup> | b <sup>+++</sup> | b <sup>0</sup> | b <sup>0++</sup> | Seq. | y              | y <sup>++</sup> | y <sup>+</sup> | y <sup>+++</sup> | y <sup>0</sup> | y <sup>0++</sup> | #  |
|----|----------------|-----------------|----------------|------------------|----------------|------------------|------|----------------|-----------------|----------------|------------------|----------------|------------------|----|
| 1  | 88.09          | 44.55           |                |                  | 70.07          | 35.54            | S    |                |                 |                |                  |                |                  | 20 |
| 2  | <b>235.26</b>  | 118.13          |                |                  | 217.24         | 109.13           | F    | 2202.51        | 1101.76         | 2185.48        | 1093.25          | 2184.50        | 1092.75          | 19 |
| 3  | <b>334.39</b>  | 167.70          |                |                  | 316.37         | 158.69           | V    | 2055.34        | <b>1028.17</b>  | 2038.31        | <b>1019.66</b>   | 2037.33        | 1019.17          | 18 |
| 4  | 447.55         | 224.28          |                |                  | 429.53         | 215.27           | L    | 1956.21        | <b>978.61</b>   | 1939.18        | <b>970.09</b>    | 1938.19        | <b>969.60</b>    | 17 |
| 5  | 561.65         | 281.33          | <b>544.62</b>  | <b>272.81</b>    | <b>543.64</b>  | <b>272.32</b>    | N    | 1843.05        | <b>922.03</b>   | 1826.02        | <b>913.51</b>    | 1825.04        | <b>913.02</b>    | 16 |
| 6  | 674.81         | 337.91          | <b>657.78</b>  | 329.39           | 656.79         | <b>328.90</b>    | L    | 1728.95        | <b>864.98</b>   | 1711.92        | 856.46           | 1710.93        | 855.97           | 15 |
| 7  | 731.86         | 366.43          | <b>714.83</b>  | 357.92           | 713.84         | 357.43           | G    | 1615.79        | <b>808.40</b>   | 1598.76        | <b>799.88</b>    | 1597.78        | <b>799.39</b>    | 14 |
| 8  | 860.03         | 430.52          | 843.00         | 422.00           | 842.02         | 421.51           | K    | 1558.74        | 779.87          | 1541.71        | 771.36           | 1540.72        | 770.87           | 13 |
| 9  | 975.12         | 488.06          | 958.09         | 479.55           | 957.10         | 479.06           | D    | 1430.57        | <b>715.79</b>   | 1413.54        | 707.27           | 1412.55        | 706.78           | 12 |
| 10 | <b>1062.20</b> | 531.60          | 1045.17        | 523.09           | 1044.18        | 522.59           | S    | 1315.48        | <b>658.24</b>   | 1298.45        | <b>649.73</b>    | 1297.47        | <b>649.24</b>    | 11 |
| 11 | <b>1176.30</b> | 588.65          | 1159.27        | <b>580.14</b>    | 1158.28        | <b>579.65</b>    | N    | 1228.40        | <b>614.71</b>   | 1211.37        | 606.19           |                |                  | 10 |
| 12 | <b>1290.40</b> | <b>645.70</b>   | 1273.37        | 637.19           | 1272.39        | 636.70           | N    | <b>1114.30</b> | <b>557.65</b>   | 1097.27        | 549.14           |                |                  | 9  |
| 13 | 1403.56        | <b>702.28</b>   | 1386.53        | 693.77           | 1385.54        | 693.28           | L    | <b>1000.20</b> | 500.60          | 983.17         | 492.09           |                |                  | 8  |
| 14 | 1506.70        | 753.85          | 1489.67        | <b>745.34</b>    | 1488.69        | <b>744.85</b>    | C    | <b>887.04</b>  | <b>444.02</b>   | 870.01         | 435.51           |                |                  | 7  |
| 15 | 1619.86        | <b>810.43</b>   | 1602.83        | 801.92           | 1601.84        | <b>801.43</b>    | L    | <b>783.90</b>  | <b>392.45</b>   | 766.87         | 383.94           |                |                  | 6  |
| 16 | 1757.00        | <b>879.00</b>   | 1739.97        | 870.49           | 1738.98        | 870.00           | H    | <b>670.74</b>  | <b>335.87</b>   | <b>653.71</b>  | <b>327.36</b>    |                |                  | 5  |
| 17 | 1904.17        | 952.59          | 1887.14        | <b>944.08</b>    | 1886.16        | <b>943.58</b>    | F    | <b>533.60</b>  | 267.30          | 516.57         | 258.79           |                |                  | 4  |
| 18 | 2018.28        | <b>1009.64</b>  | 2001.24        | <b>1001.13</b>   | 2000.26        | <b>1000.63</b>   | N    | <b>386.43</b>  | 193.72          | <b>369.40</b>  | 185.20           |                |                  | 3  |
| 19 | 2115.39        | <b>1058.20</b>  | 2098.36        | 1049.68          | 2097.38        | 1049.19          | P    | <b>272.32</b>  | 136.67          | <b>255.29</b>  | 128.15           |                |                  | 2  |
| 20 |                |                 |                |                  |                |                  | R    | 175.21         | 88.11           | 158.18         | 79.59            |                |                  | 1  |

Gene Symbol  
LOC653781

Sequences  
CPEALFQPCFLGMESCIGIHETTFNSIMK

m/z  
1088.00

Charge  
3+

Ion score  
62.2

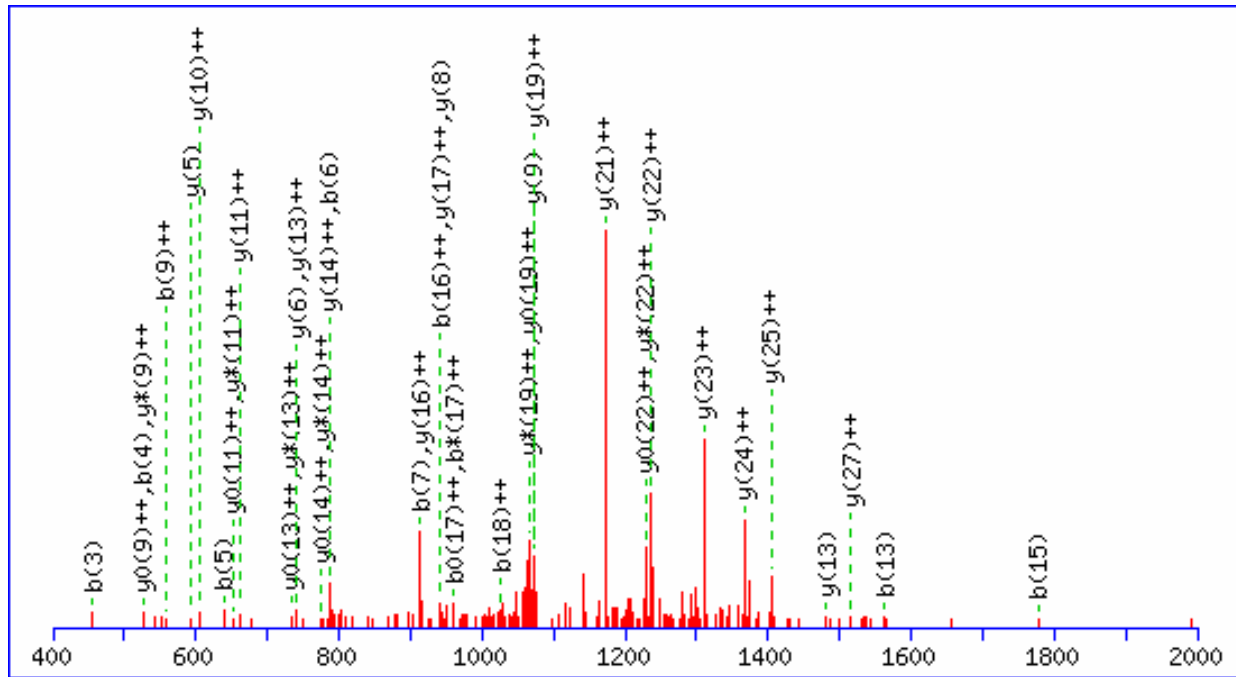

C1 : NEM (C)

| #  | b       | b <sup>+</sup> | b <sup>+</sup> | b <sup>++</sup> | b <sup>0</sup> | b <sup>0++</sup> | Seq. | y       | y <sup>+</sup> | y <sup>+</sup> | y <sup>++</sup> | y <sup>0</sup> | y <sup>0++</sup> | #  |
|----|---------|----------------|----------------|-----------------|----------------|------------------|------|---------|----------------|----------------|-----------------|----------------|------------------|----|
| 1  | 229.28  | 115.14         |                |                 |                |                  | C    |         |                |                |                 |                |                  | 28 |
| 2  | 326.39  | 163.70         |                |                 |                |                  | P    | 3032.51 | 1516.76        | 3015.48        | 1508.24         | 3014.50        | 1507.75          | 27 |
| 3  | 455.51  | 228.26         |                |                 | 437.49         | 219.25           | E    | 2935.40 | 1468.20        | 2918.37        | 1459.69         | 2917.38        | 1459.19          | 26 |
| 4  | 526.58  | 263.80         |                |                 | 508.57         | 254.79           | A    | 2806.28 | 1403.65        | 2789.25        | 1395.13         | 2788.27        | 1394.64          | 25 |
| 5  | 639.74  | 320.37         |                |                 | 621.73         | 311.37           | L    | 2735.20 | 1368.11        | 2718.17        | 1359.59         | 2717.19        | 1359.10          | 24 |
| 6  | 786.91  | 393.96         |                |                 | 768.90         | 384.95           | F    | 2622.05 | 1311.53        | 2605.02        | 1303.01         | 2604.03        | 1302.52          | 23 |
| 7  | 915.04  | 458.03         | 898.01         | 449.51          | 897.03         | 449.02           | Q    | 2474.87 | 1237.94        | 2457.84        | 1229.43         | 2456.86        | 1228.93          | 22 |
| 8  | 1012.16 | 506.58         | 995.13         | 498.07          | 994.14         | 497.58           | P    | 2346.74 | 1173.88        | 2329.71        | 1165.36         | 2328.73        | 1164.87          | 21 |
| 9  | 1115.30 | 558.15         | 1098.27        | 549.64          | 1097.29        | 549.15           | C    | 2249.63 | 1125.32        | 2232.60        | 1116.80         | 2231.61        | 1116.31          | 20 |
| 10 | 1262.48 | 631.74         | 1245.45        | 623.23          | 1244.46        | 622.73           | F    | 2146.49 | 1073.75        | 2129.46        | 1065.23         | 2128.47        | 1064.74          | 19 |
| 11 | 1375.63 | 688.32         | 1358.60        | 679.81          | 1357.62        | 679.31           | L    | 1999.31 | 1000.16        | 1982.28        | 991.64          | 1981.30        | 991.15           | 18 |
| 12 | 1432.68 | 716.85         | 1415.65        | 708.33          | 1414.67        | 707.84           | G    | 1886.15 | 943.58         | 1869.12        | 935.07          | 1868.14        | 934.57           | 17 |
| 13 | 1563.88 | 782.44         | 1546.85        | 773.93          | 1545.87        | 773.44           | M    | 1829.10 | 915.06         | 1812.07        | 906.54          | 1811.09        | 906.05           | 16 |
| 14 | 1692.99 | 847.00         | 1675.96        | 838.49          | 1674.98        | 837.99           | E    | 1697.91 | 849.46         | 1680.88        | 840.94          | 1679.89        | 840.45           | 15 |
| 15 | 1780.07 | 890.54         | 1763.04        | 882.02          | 1762.06        | 881.53           | S    | 1568.79 | 784.90         | 1551.76        | 776.39          | 1550.78        | 775.89           | 14 |
| 16 | 1883.22 | 942.11         | 1866.18        | 933.60          | 1865.20        | 933.10           | C    | 1481.72 | 741.36         | 1464.69        | 732.85          | 1463.70        | 732.35           | 13 |
| 17 | 1940.27 | 970.64         | 1923.24        | 962.12          | 1922.25        | 961.63           | G    | 1378.57 | 689.79         | 1361.54        | 681.28          | 1360.56        | 680.78           | 12 |
| 18 | 2053.42 | 1027.22        | 2036.39        | 1018.70         | 2035.41        | 1018.21          | I    | 1321.52 | 661.26         | 1304.49        | 652.75          | 1303.51        | 652.26           | 11 |
| 19 | 2190.56 | 1095.79        | 2173.53        | 1087.27         | 2172.55        | 1086.78          | H    | 1208.36 | 604.69         | 1191.33        | 596.17          | 1190.35        | 595.68           | 10 |
| 20 | 2319.68 | 1160.34        | 2302.65        | 1151.83         | 2301.66        | 1151.34          | E    | 1071.22 | 536.12         | 1054.19        | 527.60          | 1053.21        | 527.11           | 9  |
| 21 | 2420.78 | 1210.89        | 2403.75        | 1202.38         | 2402.77        | 1201.89          | T    | 942.11  | 471.56         | 925.08         | 463.04          | 924.10         | 462.55           | 8  |
| 22 | 2521.89 | 1261.45        | 2504.85        | 1252.93         | 2503.87        | 1252.44          | T    | 841.01  | 421.01         | 823.98         | 412.49          | 822.99         | 412.00           | 7  |
| 23 | 2669.06 | 1335.03        | 2652.03        | 1326.52         | 2651.04        | 1326.03          | F    | 739.90  | 370.46         | 722.87         | 361.94          | 721.89         | 361.45           | 6  |
| 24 | 2783.16 | 1392.08        | 2766.13        | 1383.57         | 2765.15        | 1383.08          | N    | 592.73  | 296.87         | 575.70         | 288.35          | 574.71         | 287.86           | 5  |
| 25 | 2870.24 | 1435.62        | 2853.21        | 1427.11         | 2852.22        | 1426.62          | S    | 478.63  | 239.82         | 461.60         | 231.30          | 460.61         | 230.81           | 4  |
| 26 | 2983.40 | 1492.20        | 2966.37        | 1483.69         | 2965.38        | 1483.19          | I    | 391.55  | 196.28         | 374.52         | 187.76          |                |                  | 3  |
| 27 | 3114.59 | 1557.80        | 3097.56        | 1549.29         | 3096.58        | 1548.79          | M    | 278.39  | 139.70         | 261.36         | 131.18          |                |                  | 2  |
| 28 |         |                |                |                 |                |                  | K    | 147.20  | 74.10          | 130.17         | 65.59           |                |                  | 1  |

Gene Symbol  
LOC730269

Sequences  
[CDCFHMVLPTWPGTPGSVSGR](#)

m/z  
1146.10

Charge  
2+

Ion score  
72.5

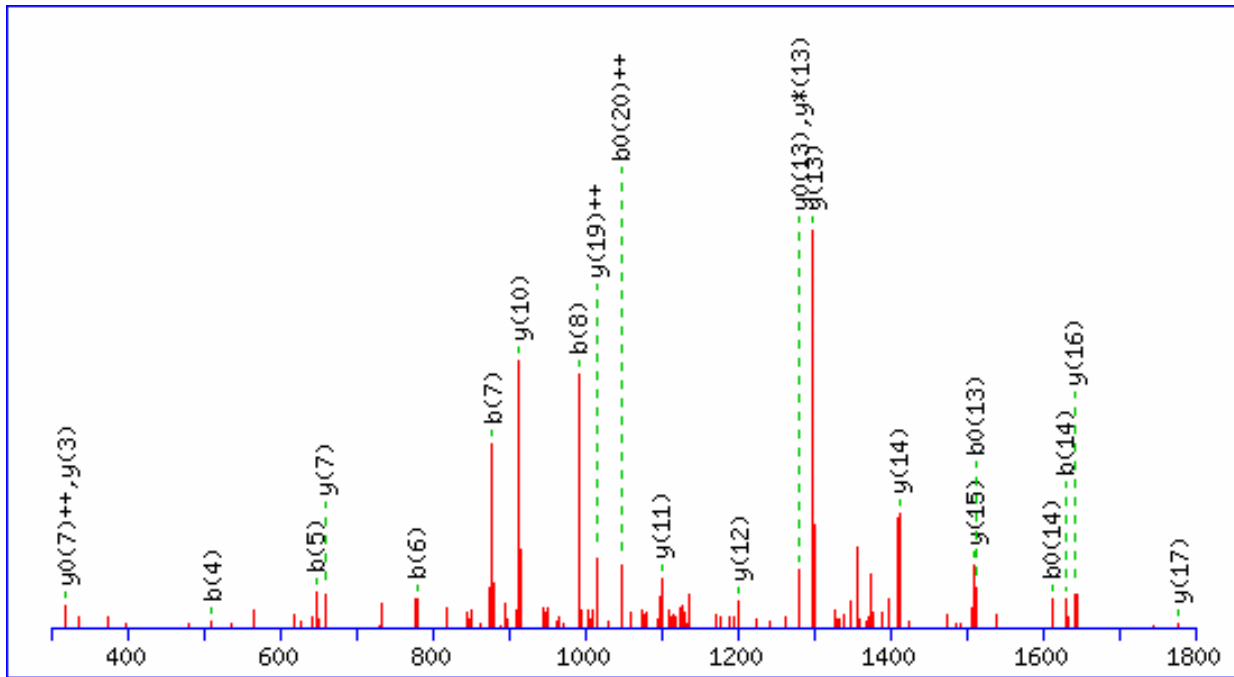

N-term : N-Acetyl (Protein)

| #  | b              | b <sup>++</sup> | b <sup>0</sup> | b <sup>0++</sup> | Seq. | y              | y <sup>++</sup> | y <sup>*</sup> | y <sup>*++</sup> | y <sup>0</sup> | y <sup>0++</sup> | #  |
|----|----------------|-----------------|----------------|------------------|------|----------------|-----------------|----------------|------------------|----------------|------------------|----|
| 1  | 146.19         | 73.60           |                |                  | C    |                |                 |                |                  |                |                  | 21 |
| 2  | 261.27         | 131.14          | 243.26         | 122.13           | D    | 2145.44        | 1073.22         | 2128.41        | 1064.71          | 2127.42        | 1064.22          | 20 |
| 3  | 364.42         | 182.71          | 346.40         | 173.71           | C    | 2030.35        | <b>1015.68</b>  | 2013.32        | 1007.17          | 2012.34        | 1006.67          | 19 |
| 4  | <b>511.59</b>  | 256.30          | 493.58         | 247.29           | F    | 1927.21        | 964.11          | 1910.18        | 955.59           | 1909.19        | 955.10           | 18 |
| 5  | <b>648.73</b>  | 324.87          | 630.72         | 315.86           | H    | <b>1780.04</b> | 890.52          | 1763.01        | 882.01           | 1762.02        | 881.51           | 17 |
| 6  | <b>779.93</b>  | 390.47          | 761.91         | 381.46           | M    | <b>1642.90</b> | 821.95          | 1625.87        | 813.44           | 1624.88        | 812.94           | 16 |
| 7  | <b>879.06</b>  | 440.03          | 861.04         | 431.03           | V    | <b>1511.70</b> | 756.35          | 1494.67        | 747.84           | 1493.69        | 747.35           | 15 |
| 8  | <b>992.22</b>  | 496.61          | 974.20         | 487.60           | L    | <b>1412.57</b> | 706.79          | 1395.54        | 698.27           | 1394.55        | 697.78           | 14 |
| 9  | 1089.33        | 545.17          | 1071.32        | 536.16           | P    | <b>1299.41</b> | 650.21          | <b>1282.38</b> | 641.69           | <b>1281.40</b> | 641.20           | 13 |
| 10 | 1190.43        | 595.72          | 1172.42        | 586.71           | T    | <b>1202.30</b> | 601.65          | 1185.27        | 593.14           | 1184.28        | 592.64           | 12 |
| 11 | 1376.64        | 688.83          | 1358.63        | 679.82           | W    | <b>1101.19</b> | 551.10          | 1084.16        | 542.59           | 1083.18        | 542.09           | 11 |
| 12 | 1473.76        | 737.38          | 1455.74        | 728.38           | P    | <b>914.98</b>  | 458.00          | 897.95         | 449.48           | 896.97         | 448.99           | 10 |
| 13 | 1530.81        | 765.91          | <b>1512.80</b> | 756.90           | G    | 817.87         | 409.44          | 800.84         | 400.92           | 799.85         | 400.43           | 9  |
| 14 | <b>1631.92</b> | 816.46          | <b>1613.90</b> | 807.45           | T    | 760.82         | 380.91          | 743.79         | 372.40           | 742.80         | 371.90           | 8  |
| 15 | 1729.03        | 865.02          | 1711.02        | 856.01           | P    | <b>659.71</b>  | 330.36          | 642.68         | 321.84           | 641.70         | <b>321.35</b>    | 7  |
| 16 | 1786.08        | 893.54          | 1768.07        | 884.54           | G    | 562.60         | 281.80          | 545.57         | 273.29           | 544.58         | 272.79           | 6  |
| 17 | 1873.16        | 937.08          | 1855.14        | 928.08           | S    | 505.55         | 253.28          | 488.52         | 244.76           | 487.53         | 244.27           | 5  |
| 18 | 1972.29        | 986.65          | 1954.27        | 977.64           | V    | 418.47         | 209.74          | 401.44         | 201.22           | 400.45         | 200.73           | 4  |
| 19 | 2059.37        | 1030.19         | 2041.35        | 1021.18          | S    | <b>319.34</b>  | 160.17          | 302.31         | 151.66           | 301.32         | 151.17           | 3  |
| 20 | 2116.42        | 1058.71         | 2098.40        | <b>1049.71</b>   | G    | 232.26         | 116.63          | 215.23         | 108.12           |                |                  | 2  |
| 21 |                |                 |                |                  | R    | 175.21         | 88.11           | 158.18         | 79.59            |                |                  | 1  |

Gene Symbol  
M6PR

Sequences  
AVVMISCNRHTLADNFPVSEER

m/z  
869.04

Charge  
3+

Ion score  
101.1

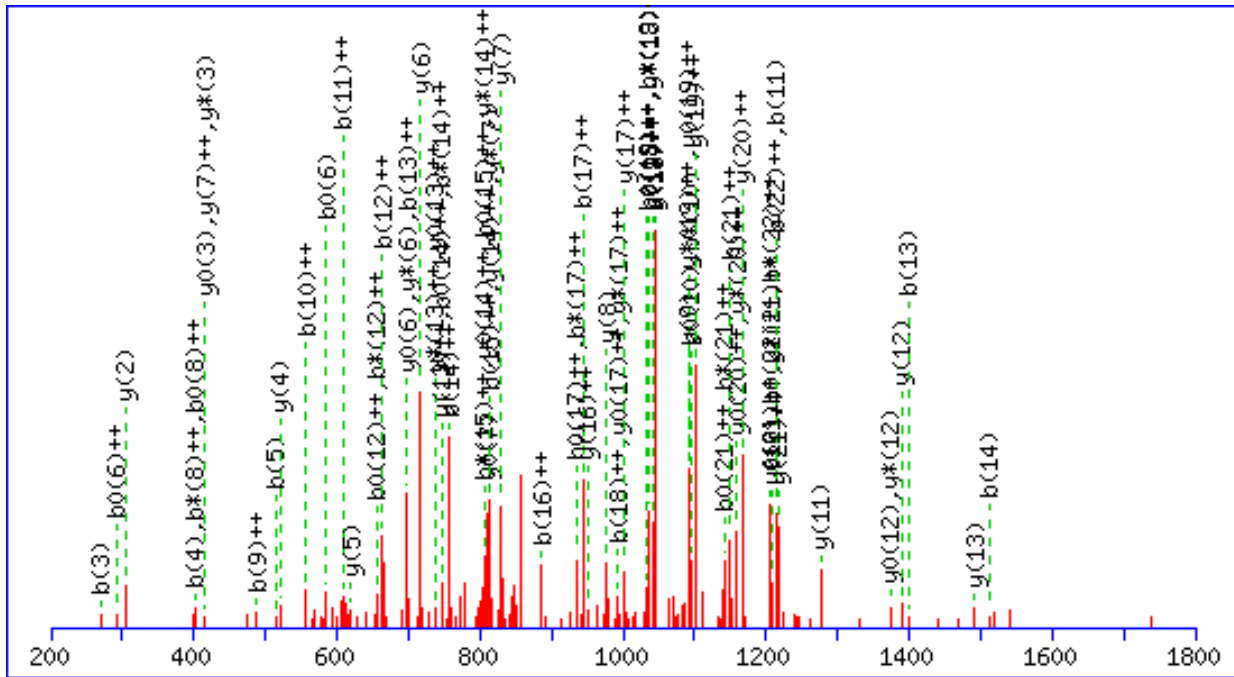

| #  | b              | b <sup>++</sup> | b <sup>*</sup> | b <sup>*++</sup> | b <sup>0</sup> | b <sup>0++</sup> | Seq. | y              | y <sup>++</sup> | y <sup>*</sup> | y <sup>*++</sup> | y <sup>0</sup> | y <sup>0++</sup> | #  |
|----|----------------|-----------------|----------------|------------------|----------------|------------------|------|----------------|-----------------|----------------|------------------|----------------|------------------|----|
| 1  | 72.09          | 36.55           |                |                  |                |                  | A    |                |                 |                |                  |                |                  | 23 |
| 2  | 171.22         | 86.11           |                |                  |                |                  | V    | 2532.83        | 1266.92         | 2515.80        | 1258.40          | 2514.81        | 1257.91          | 22 |
| 3  | <b>270.35</b>  | 135.68          |                |                  |                |                  | V    | 2433.70        | <b>1217.35</b>  | 2416.67        | <b>1208.84</b>   | 2415.68        | <b>1208.35</b>   | 21 |
| 4  | <b>401.54</b>  | 201.28          |                |                  |                |                  | M    | 2334.57        | <b>1167.79</b>  | 2317.54        | <b>1159.27</b>   | 2316.55        | <b>1158.78</b>   | 20 |
| 5  | <b>514.70</b>  | 257.85          |                |                  |                |                  | I    | 2203.37        | <b>1102.19</b>  | 2186.34        | <b>1093.67</b>   | 2185.36        | <b>1093.18</b>   | 19 |
| 6  | 601.78         | 301.39          |                |                  | <b>583.76</b>  | <b>292.39</b>    | S    | 2090.21        | <b>1045.61</b>  | 2073.18        | <b>1037.10</b>   | 2072.20        | <b>1036.60</b>   | 18 |
| 7  | 704.92         | 352.96          |                |                  | 686.91         | 343.96           | C    | 2003.14        | <b>1002.07</b>  | 1986.11        | <b>993.56</b>    | 1985.12        | <b>993.06</b>    | 17 |
| 8  | 819.02         | 410.02          | 801.99         | <b>401.50</b>    | 801.01         | <b>401.01</b>    | N    | 1899.99        | <b>950.50</b>   | 1882.96        | 941.99           | 1881.98        | 941.49           | 16 |
| 9  | 975.21         | <b>488.11</b>   | 958.18         | 479.59           | 957.19         | 479.10           | R    | 1785.89        | 893.45          | 1768.86        | 884.93           | 1767.88        | 884.44           | 15 |
| 10 | 1112.35        | <b>556.68</b>   | <b>1095.32</b> | 548.16           | <b>1094.33</b> | 547.67           | H    | 1629.71        | <b>815.36</b>   | 1612.68        | <b>806.84</b>    | 1611.69        | <b>806.35</b>    | 14 |
| 11 | <b>1213.45</b> | <b>607.23</b>   | 1196.42        | 598.72           | 1195.44        | 598.22           | T    | <b>1492.57</b> | <b>746.79</b>   | 1475.54        | <b>738.27</b>    | 1474.55        | <b>737.78</b>    | 13 |
| 12 | 1326.61        | <b>663.81</b>   | 1309.58        | <b>655.29</b>    | 1308.60        | <b>654.80</b>    | L    | <b>1391.46</b> | 696.24          | <b>1374.43</b> | 687.72           | <b>1373.45</b> | 687.23           | 12 |
| 13 | <b>1397.69</b> | <b>699.35</b>   | 1380.66        | 690.83           | 1379.67        | 690.34           | A    | <b>1278.30</b> | 639.66          | 1261.27        | 631.14           | 1260.29        | 630.65           | 11 |
| 14 | <b>1512.78</b> | <b>756.89</b>   | 1495.75        | <b>748.38</b>    | 1494.76        | <b>747.88</b>    | D    | <b>1207.23</b> | 604.12          | 1190.20        | 595.60           | 1189.21        | 595.11           | 10 |
| 15 | 1626.88        | <b>813.94</b>   | 1609.85        | <b>805.43</b>    | 1608.86        | <b>804.94</b>    | N    | <b>1092.14</b> | 546.57          | 1075.11        | 538.06           | 1074.12        | 537.57           | 9  |
| 16 | 1774.05        | <b>887.53</b>   | 1757.02        | 879.02           | 1756.04        | 878.52           | F    | <b>978.04</b>  | 489.52          | 961.01         | 481.01           | 960.02         | 480.51           | 8  |
| 17 | 1888.16        | <b>944.58</b>   | 1871.12        | <b>936.07</b>    | 1870.14        | <b>935.57</b>    | N    | <b>830.86</b>  | <b>415.94</b>   | <b>813.83</b>  | 407.42           | <b>812.85</b>  | 406.93           | 7  |
| 18 | 1985.27        | <b>993.14</b>   | 1968.24        | 984.62           | 1967.26        | 984.13           | P    | <b>716.76</b>  | 358.88          | <b>699.73</b>  | 350.37           | <b>698.75</b>  | 349.88           | 6  |
| 19 | 2084.40        | <b>1042.70</b>  | 2067.37        | <b>1034.19</b>   | 2066.39        | <b>1033.70</b>   | V    | <b>619.65</b>  | 310.33          | 602.61         | 301.81           | 601.63         | 301.32           | 5  |
| 20 | 2171.48        | 1086.24         | 2154.45        | 1077.73          | 2153.46        | 1077.24          | S    | <b>520.51</b>  | 260.76          | 503.48         | 252.25           | 502.50         | 251.75           | 4  |
| 21 | 2300.59        | <b>1150.80</b>  | 2283.56        | <b>1142.29</b>   | 2282.58        | <b>1141.79</b>   | E    | 433.44         | 217.22          | <b>416.41</b>  | 208.71           | <b>415.42</b>  | 208.21           | 3  |
| 22 | 2429.71        | <b>1215.36</b>  | 2412.68        | <b>1206.84</b>   | 2411.69        | <b>1206.35</b>   | E    | <b>304.32</b>  | 152.67          | 287.29         | 144.15           | 286.31         | 143.66           | 2  |
| 23 |                |                 |                |                  |                |                  | R    | 175.21         | 88.11           | 158.18         | 79.59            |                |                  | 1  |



Gene Symbol  
MMP14

Sequences  
RLLY**C**QR

m/z  
476.58

Charge  
2+

Ion score  
45.6

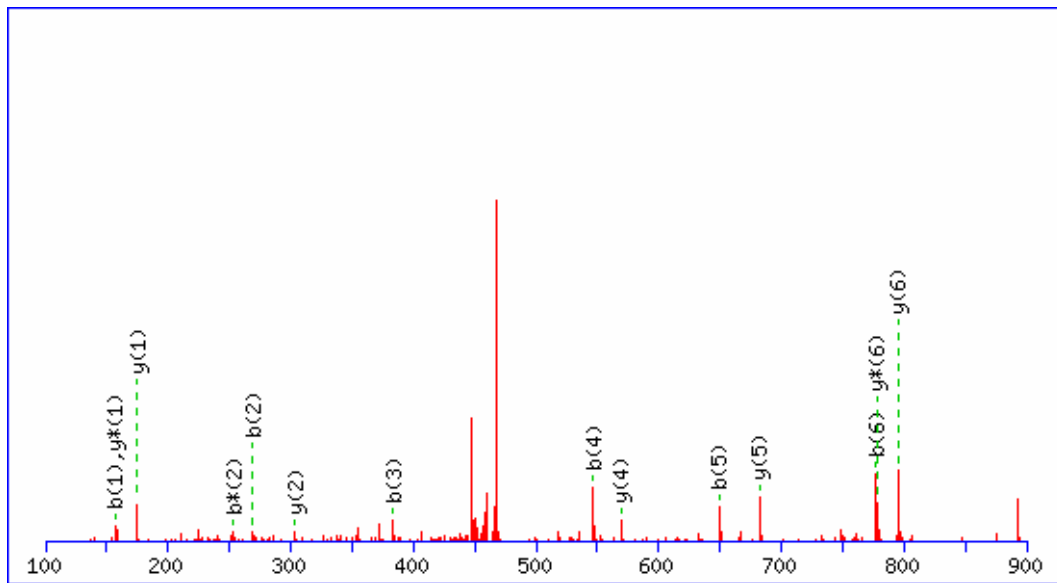

| # | b      | b <sup>++</sup> | b <sup>*</sup> | b <sup>*++</sup> | Seq. | y      | y <sup>++</sup> | y <sup>*</sup> | y <sup>*++</sup> | # |
|---|--------|-----------------|----------------|------------------|------|--------|-----------------|----------------|------------------|---|
| 1 | 157.19 | 79.10           | 140.16         | 70.59            | R    |        |                 |                |                  | 7 |
| 2 | 270.35 | 135.68          | 253.32         | 127.16           | L    | 795.97 | 398.49          | 778.94         | 389.97           | 6 |
| 3 | 383.51 | 192.26          | 366.48         | 183.74           | L    | 682.81 | 341.91          | 665.78         | 333.39           | 5 |
| 4 | 546.68 | 273.85          | 529.65         | 265.33           | Y    | 569.65 | 285.33          | 552.62         | 276.82           | 4 |
| 5 | 649.83 | 325.42          | 632.79         | 316.90           | C    | 406.48 | 203.74          | 389.45         | 195.23           | 3 |
| 6 | 777.95 | 389.48          | 760.92         | 380.97           | Q    | 303.34 | 152.17          | 286.31         | 143.66           | 2 |
| 7 |        |                 |                |                  | R    | 175.21 | 88.11           | 158.18         | 79.59            | 1 |

Gene Symbol  
MPP1

Sequences  
VASMAQSAPEAPS**C**SPFGK

m/z  
976.59

Charge  
2+

Ion score  
87.3

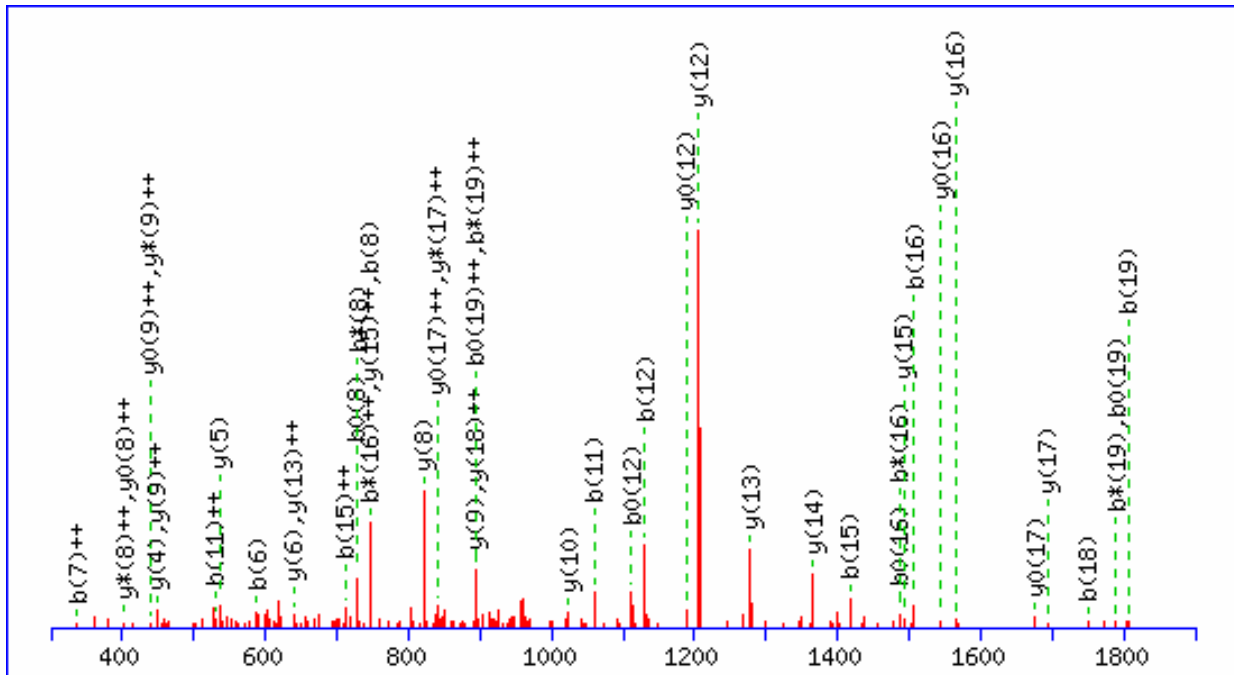

| #  | b              | b <sup>++</sup> | b <sup>*</sup> | b <sup>*++</sup> | b <sup>0</sup> | b <sup>0++</sup> | Seq. | y              | y <sup>++</sup> | y <sup>*</sup> | y <sup>*++</sup> | y <sup>0</sup> | y <sup>0++</sup> | #  |
|----|----------------|-----------------|----------------|------------------|----------------|------------------|------|----------------|-----------------|----------------|------------------|----------------|------------------|----|
| 1  | 100.14         | 50.57           |                |                  |                |                  | V    |                |                 |                |                  |                |                  | 20 |
| 2  | 171.22         | 86.11           |                |                  |                |                  | A    | 1854.05        | 927.53          | 1837.02        | 919.01           | 1836.03        | 918.52           | 19 |
| 3  | 258.29         | 129.65          |                |                  | 240.28         | 120.64           | S    | 1782.97        | <b>891.99</b>   | 1765.94        | 883.47           | 1764.95        | 882.98           | 18 |
| 4  | 389.49         | 195.25          |                |                  | 371.48         | 186.24           | M    | <b>1695.89</b> | 848.45          | 1678.86        | <b>839.93</b>    | <b>1677.88</b> | <b>839.44</b>    | 17 |
| 5  | 460.57         | 230.79          |                |                  | 442.55         | 221.78           | A    | <b>1564.70</b> | 782.85          | 1547.66        | 774.34           | <b>1546.68</b> | 773.84           | 16 |
| 6  | <b>588.70</b>  | 294.85          | 571.67         | 286.34           | 570.68         | 285.85           | Q    | <b>1493.62</b> | <b>747.31</b>   | 1476.59        | 738.80           | 1475.60        | 738.31           | 15 |
| 7  | 675.77         | <b>338.39</b>   | 658.74         | 329.88           | 657.76         | 329.38           | S    | <b>1365.49</b> | 683.25          | 1348.46        | 674.73           | 1347.47        | 674.24           | 14 |
| 8  | <b>746.85</b>  | 373.93          | <b>729.82</b>  | 365.42           | <b>728.84</b>  | 364.92           | A    | <b>1278.41</b> | <b>639.71</b>   | 1261.38        | 631.19           | 1260.40        | 630.70           | 13 |
| 9  | 843.97         | 422.49          | 826.94         | 413.97           | 825.95         | 413.48           | P    | <b>1207.33</b> | 604.17          | 1190.30        | 595.66           | <b>1189.32</b> | 595.16           | 12 |
| 10 | 931.05         | 466.03          | 914.01         | 457.51           | 913.03         | 457.02           | S    | 1110.22        | 555.61          | 1093.19        | 547.10           | 1092.20        | 546.61           | 11 |
| 11 | <b>1060.16</b> | <b>530.58</b>   | 1043.13        | 522.07           | 1042.14        | 521.58           | E    | <b>1023.14</b> | 512.07          | 1006.11        | 503.56           | 1005.13        | 503.07           | 10 |
| 12 | <b>1131.24</b> | 566.12          | 1114.21        | 557.61           | <b>1113.22</b> | 557.11           | A    | <b>894.03</b>  | <b>447.52</b>   | 877.00         | <b>439.00</b>    | 876.01         | <b>438.51</b>    | 9  |
| 13 | 1228.35        | 614.68          | 1211.32        | 606.16           | 1210.34        | 605.67           | P    | <b>822.95</b>  | 411.98          | 805.92         | <b>403.46</b>    | 804.93         | <b>402.97</b>    | 8  |
| 14 | 1315.43        | 658.22          | 1298.40        | 649.70           | 1297.41        | 649.21           | S    | 725.83         | 363.42          | 708.80         | 354.91           | 707.82         | 354.41           | 7  |
| 15 | <b>1418.57</b> | <b>709.79</b>   | 1401.54        | 701.27           | 1400.56        | 700.78           | C    | <b>638.76</b>  | 319.88          | 621.73         | 311.37           | 620.74         | 310.87           | 6  |
| 16 | <b>1505.65</b> | 753.33          | <b>1488.62</b> | <b>744.81</b>    | <b>1487.63</b> | 744.32           | S    | <b>535.61</b>  | 268.31          | 518.58         | 259.80           | 517.60         | 259.30           | 5  |
| 17 | 1602.76        | 801.89          | 1585.73        | 793.37           | 1584.75        | 792.88           | P    | <b>448.54</b>  | 224.77          | 431.51         | 216.26           |                |                  | 4  |
| 18 | <b>1749.94</b> | 875.47          | 1732.91        | 866.96           | 1731.92        | 866.47           | F    | 351.42         | 176.21          | 334.39         | 167.70           |                |                  | 3  |
| 19 | <b>1806.99</b> | 904.00          | <b>1789.96</b> | <b>895.48</b>    | <b>1788.97</b> | <b>894.99</b>    | G    | 204.25         | 102.63          | 187.22         | 94.11            |                |                  | 2  |
| 20 |                |                 |                |                  |                |                  | K    | 147.20         | 74.10           | 130.16         | 65.59            |                |                  | 1  |

Gene Symbol  
MPP6

Sequences  
RDWDNSGPF**C**GTISSK

m/z  
885.71

Charge  
2+

Ion score  
62.4

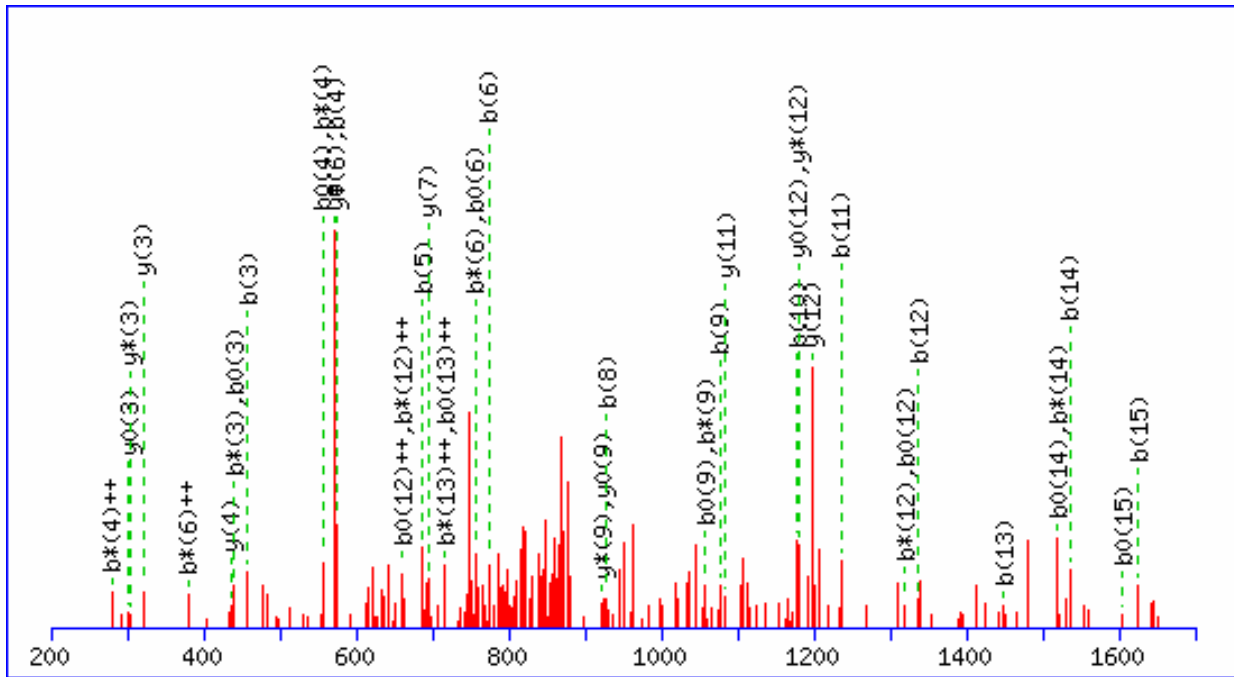

| #  | b              | b <sup>++</sup> | b <sup>*</sup> | b <sup>*++</sup> | b <sup>0</sup> | b <sup>0++</sup> | Seq. | y              | y <sup>++</sup> | y <sup>*</sup> | y <sup>*++</sup> | y <sup>0</sup> | y <sup>0++</sup> | #  |
|----|----------------|-----------------|----------------|------------------|----------------|------------------|------|----------------|-----------------|----------------|------------------|----------------|------------------|----|
| 1  | 157.19         | 79.10           | 140.16         | 70.59            |                |                  | R    |                |                 |                |                  |                |                  | 16 |
| 2  | 272.28         | 136.64          | 255.25         | 128.13           | 254.27         | 127.64           | D    | 1614.71        | 807.86          | 1597.68        | 799.34           | 1596.70        | 798.85           | 15 |
| 3  | <b>458.49</b>  | 229.75          | <b>441.46</b>  | 221.23           | <b>440.48</b>  | 220.74           | W    | 1499.62        | 750.32          | 1482.59        | 741.80           | 1481.61        | 741.31           | 14 |
| 4  | <b>573.58</b>  | 287.29          | <b>556.55</b>  | <b>278.78</b>    | <b>555.56</b>  | 278.29           | D    | 1313.41        | 657.21          | 1296.38        | 648.70           | 1295.40        | 648.20           | 13 |
| 5  | <b>687.68</b>  | 344.34          | 670.65         | 335.83           | 669.67         | 335.34           | N    | <b>1198.33</b> | 599.67          | <b>1181.30</b> | 591.15           | <b>1180.31</b> | 590.66           | 12 |
| 6  | <b>774.76</b>  | 387.88          | <b>757.73</b>  | <b>379.37</b>    | <b>756.74</b>  | 378.88           | S    | <b>1084.22</b> | 542.62          | 1067.19        | 534.10           | 1066.21        | 533.61           | 11 |
| 7  | 831.81         | 416.41          | 814.78         | 407.89           | 813.79         | 407.40           | G    | 997.15         | 499.08          | 980.12         | 490.56           | 979.13         | 490.07           | 10 |
| 8  | <b>928.92</b>  | 464.97          | 911.89         | 456.45           | 910.91         | 455.96           | P    | 940.09         | 470.55          | <b>923.06</b>  | 462.04           | <b>922.08</b>  | 461.54           | 9  |
| 9  | <b>1076.10</b> | 538.55          | <b>1059.07</b> | 530.04           | <b>1058.08</b> | 529.55           | F    | 842.98         | 421.99          | 825.95         | 413.48           | 824.96         | 412.99           | 8  |
| 10 | <b>1179.24</b> | 590.12          | 1162.21        | 581.61           | 1161.23        | 581.12           | C    | <b>695.81</b>  | 348.41          | 678.78         | 339.89           | 677.79         | 339.40           | 7  |
| 11 | <b>1236.29</b> | 618.65          | 1219.26        | 610.14           | 1218.28        | 609.64           | G    | 592.66         | 296.84          | <b>575.63</b>  | 288.32           | <b>574.65</b>  | 287.83           | 6  |
| 12 | <b>1337.40</b> | 669.20          | <b>1320.37</b> | <b>660.69</b>    | <b>1319.38</b> | <b>660.19</b>    | T    | 535.61         | 268.31          | 518.58         | 259.79           | 517.60         | 259.30           | 5  |
| 13 | <b>1450.55</b> | 725.78          | 1433.52        | <b>717.27</b>    | 1432.54        | <b>716.77</b>    | I    | <b>434.51</b>  | 217.76          | 417.48         | 209.24           | 416.49         | 208.75           | 4  |
| 14 | <b>1537.63</b> | 769.32          | <b>1520.60</b> | 760.80           | <b>1519.62</b> | 760.31           | S    | <b>321.35</b>  | 161.18          | <b>304.32</b>  | 152.66           | <b>303.33</b>  | 152.17           | 3  |
| 15 | <b>1624.71</b> | 812.86          | 1607.68        | 804.34           | <b>1606.69</b> | 803.85           | S    | 234.27         | 117.64          | 217.24         | 109.13           | 216.26         | 108.63           | 2  |
| 16 |                |                 |                |                  |                |                  | K    | 147.20         | 74.10           | 130.16         | 65.59            |                |                  | 1  |

Gene Symbol  
MTHFD1

Sequences  
SKIVGAPMHDLLLWNNATVTT**C**HSK

m/z  
913.74

Charge  
3+

Ion score  
78.9

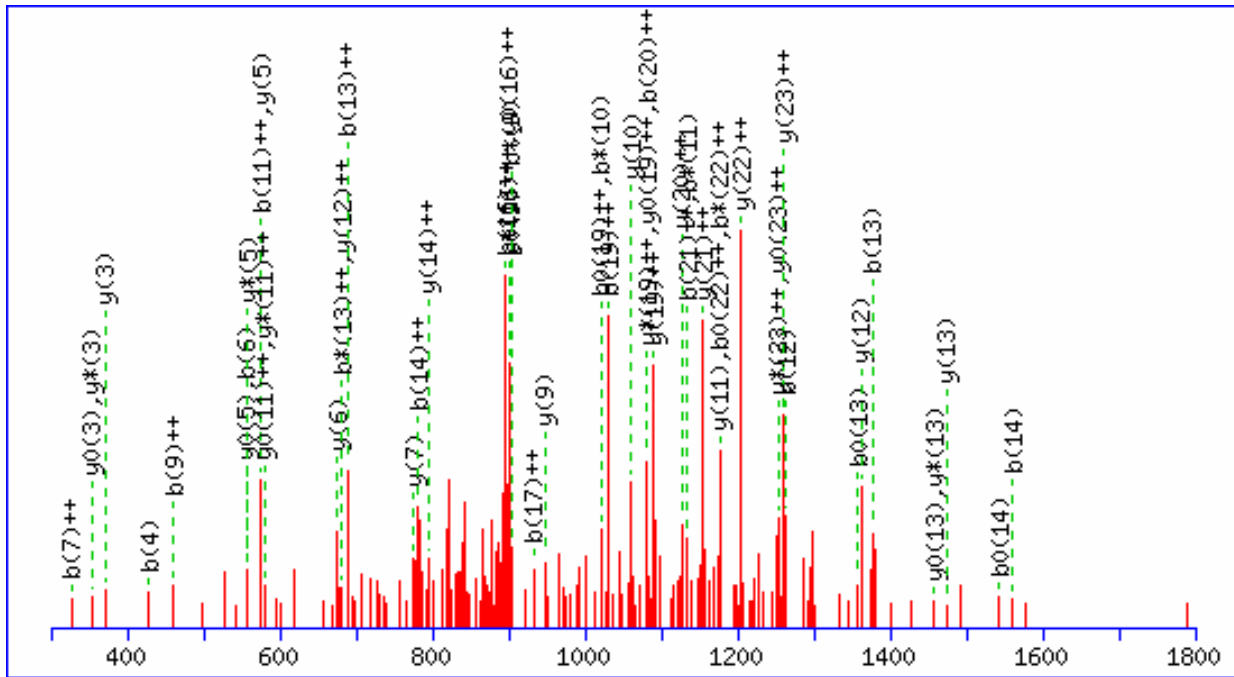

| #  | b              | b <sup>++</sup> | b <sup>+</sup> | b <sup>+++</sup> | b <sup>0</sup> | b <sup>0++</sup> | Seq. | y              | y <sup>++</sup> | y <sup>+</sup> | y <sup>+++</sup> | y <sup>0</sup> | y <sup>0++</sup> | #  |
|----|----------------|-----------------|----------------|------------------|----------------|------------------|------|----------------|-----------------|----------------|------------------|----------------|------------------|----|
| 1  | 88.09          | 44.55           |                |                  | 70.07          | 35.54            | S    |                |                 |                |                  |                |                  | 25 |
| 2  | 216.26         | 108.63          | 199.23         | 100.12           | 198.24         | 99.63            | K    | 2651.09        | 1326.05         | 2634.06        | 1317.53          | 2633.08        | 1317.04          | 24 |
| 3  | 329.42         | 165.21          | 312.38         | 156.70           | 311.40         | 156.20           | I    | 2522.92        | <b>1261.96</b>  | 2505.89        | <b>1253.45</b>   | 2504.90        | <b>1252.96</b>   | 23 |
| 4  | <b>428.55</b>  | 214.78          | 411.52         | 206.26           | 410.53         | 205.77           | V    | 2409.76        | <b>1205.38</b>  | 2392.73        | 1196.87          | 2391.75        | 1196.38          | 22 |
| 5  | 485.60         | 243.30          | 468.57         | 234.79           | 467.58         | 234.30           | G    | 2310.63        | <b>1155.82</b>  | 2293.60        | 1147.30          | 2292.62        | 1146.81          | 21 |
| 6  | <b>556.68</b>  | 278.84          | 539.64         | 270.33           | 538.66         | 269.83           | A    | 2253.58        | <b>1127.29</b>  | 2236.55        | 1118.78          | 2235.56        | 1118.29          | 20 |
| 7  | 653.79         | <b>327.40</b>   | 636.76         | 318.88           | 635.78         | 318.39           | P    | 2182.50        | <b>1091.75</b>  | 2165.47        | <b>1083.24</b>   | 2164.49        | <b>1082.75</b>   | 19 |
| 8  | 784.99         | 393.00          | 767.96         | 384.48           | 766.97         | 383.99           | M    | 2085.39        | 1043.20         | 2068.36        | 1034.68          | 2067.37        | 1034.19          | 18 |
| 9  | 922.13         | <b>461.57</b>   | <b>905.10</b>  | 453.05           | <b>904.11</b>  | 452.56           | H    | 1954.19        | 977.60          | 1937.16        | 969.08           | 1936.18        | 968.59           | 17 |
| 10 | 1037.21        | 519.11          | <b>1020.18</b> | 510.60           | 1019.20        | 510.10           | D    | 1817.05        | 909.03          | 1800.02        | <b>900.51</b>    | 1799.04        | <b>900.02</b>    | 16 |
| 11 | 1150.37        | <b>575.69</b>   | <b>1133.34</b> | 567.17           | 1132.36        | 566.68           | L    | 1701.96        | 851.49          | 1684.93        | 842.97           | 1683.95        | 842.48           | 15 |
| 12 | <b>1263.53</b> | 632.27          | 1246.50        | 623.75           | 1245.51        | 623.26           | L    | 1588.81        | <b>794.91</b>   | 1571.78        | 786.39           | 1570.79        | 785.90           | 14 |
| 13 | <b>1376.69</b> | <b>688.85</b>   | 1359.66        | <b>680.33</b>    | <b>1358.67</b> | 679.84           | L    | <b>1475.65</b> | 738.33          | <b>1458.62</b> | 729.81           | <b>1457.63</b> | 729.32           | 13 |
| 14 | <b>1562.90</b> | <b>781.95</b>   | 1545.87        | 773.44           | <b>1544.88</b> | 772.94           | W    | <b>1362.49</b> | <b>681.75</b>   | 1345.46        | 673.23           | 1344.48        | 672.74           | 12 |
| 15 | 1677.00        | 839.00          | 1659.97        | 830.49           | 1658.98        | 830.00           | N    | <b>1176.28</b> | 588.64          | 1159.25        | <b>580.13</b>    | 1158.27        | <b>579.64</b>    | 11 |
| 16 | 1791.10        | <b>896.05</b>   | 1774.07        | 887.54           | 1773.09        | 887.05           | N    | <b>1062.18</b> | 531.59          | 1045.15        | 523.08           | 1044.16        | 522.59           | 10 |
| 17 | 1862.18        | <b>931.59</b>   | 1845.15        | 923.08           | 1844.16        | 922.59           | A    | <b>948.08</b>  | 474.54          | 931.05         | 466.03           | 930.06         | 465.53           | 9  |
| 18 | 1963.28        | 982.15          | 1946.25        | 973.63           | 1945.27        | 973.14           | T    | 877.00         | 439.00          | 859.97         | 430.49           | 858.98         | 430.00           | 8  |
| 19 | 2062.41        | <b>1031.71</b>  | 2045.38        | 1023.20          | 2044.40        | <b>1022.70</b>   | V    | <b>775.89</b>  | 388.45          | 758.86         | 379.94           | 757.88         | 379.44           | 7  |
| 20 | 2163.52        | <b>1082.26</b>  | 2146.49        | 1073.75          | 2145.50        | 1073.26          | T    | <b>676.76</b>  | 338.89          | 659.73         | 330.37           | 658.75         | 329.88           | 6  |
| 21 | 2264.62        | <b>1132.81</b>  | 2247.59        | 1124.30          | 2246.61        | 1123.81          | T    | <b>575.66</b>  | 288.33          | <b>558.63</b>  | 279.82           | <b>557.64</b>  | 279.33           | 5  |
| 22 | 2367.76        | 1184.39         | 2350.73        | <b>1175.87</b>   | 2349.75        | <b>1175.38</b>   | C    | 474.56         | 237.78          | 457.52         | 229.27           | 456.54         | 228.77           | 4  |
| 23 | 2504.90        | <b>1252.96</b>  | 2487.87        | 1244.44          | 2486.89        | 1243.95          | H    | <b>371.41</b>  | 186.21          | <b>354.38</b>  | 177.69           | <b>353.40</b>  | 177.20           | 3  |
| 24 | 2591.98        | 1296.49         | 2574.95        | 1287.98          | 2573.97        | 1287.49          | S    | 234.27         | 117.64          | 217.24         | 109.13           | 216.26         | 108.63           | 2  |
| 25 |                |                 |                |                  |                |                  | K    | 147.20         | 74.10           | 130.17         | 65.59            |                |                  | 1  |

Gene Symbol  
NDFIP1

Sequences  
ALALAALAAVEPACGSR

m/z  
813.55

Charge  
2+

Ion score  
66.6

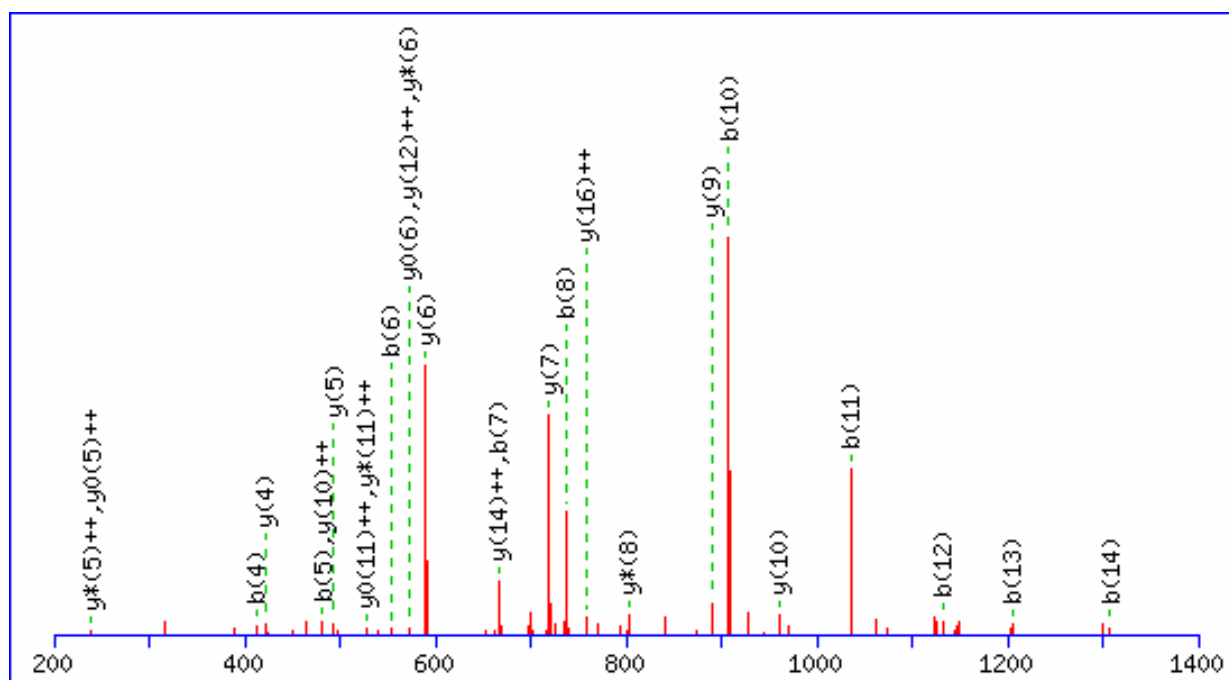

N-term : N-Acetyl (Protein)

| #  | b       | b <sup>++</sup> | b <sup>0</sup> | b <sup>0++</sup> | Seq. | y       | y <sup>++</sup> | y <sup>*</sup> | y <sup>+++</sup> | y <sup>0</sup> | y <sup>0++</sup> | #  |
|----|---------|-----------------|----------------|------------------|------|---------|-----------------|----------------|------------------|----------------|------------------|----|
| 1  | 114.12  | 57.57           |                |                  | A    |         |                 |                |                  |                |                  | 17 |
| 2  | 227.28  | 114.14          |                |                  | L    | 1513.78 | 757.39          | 1496.75        | 748.88           | 1495.77        | 748.39           | 16 |
| 3  | 298.36  | 149.68          |                |                  | A    | 1400.62 | 700.82          | 1383.59        | 692.30           | 1382.61        | 691.81           | 15 |
| 4  | 411.52  | 206.26          |                |                  | L    | 1329.55 | 665.28          | 1312.51        | 656.76           | 1311.53        | 656.27           | 14 |
| 5  | 482.59  | 241.80          |                |                  | A    | 1216.39 | 608.70          | 1199.36        | 600.18           | 1198.37        | 599.69           | 13 |
| 6  | 553.67  | 277.34          |                |                  | A    | 1145.31 | 573.16          | 1128.28        | 564.64           | 1127.29        | 564.15           | 12 |
| 7  | 666.83  | 333.92          |                |                  | L    | 1074.23 | 537.62          | 1057.20        | 529.10           | 1056.22        | 528.61           | 11 |
| 8  | 737.91  | 369.46          |                |                  | A    | 961.07  | 481.04          | 944.04         | 472.53           | 943.06         | 472.03           | 10 |
| 9  | 808.98  | 405.00          |                |                  | A    | 890.00  | 445.50          | 872.97         | 436.99           | 871.98         | 436.49           | 9  |
| 10 | 908.12  | 454.56          |                |                  | V    | 818.92  | 409.96          | 801.89         | 401.45           | 800.90         | 400.96           | 8  |
| 11 | 1037.23 | 519.12          | 1019.21        | 510.11           | E    | 719.79  | 360.40          | 702.76         | 351.88           | 701.77         | 351.39           | 7  |
| 12 | 1134.35 | 567.68          | 1116.33        | 558.67           | P    | 590.67  | 295.84          | 573.64         | 287.33           | 572.66         | 286.83           | 6  |
| 13 | 1205.42 | 603.22          | 1187.41        | 594.21           | A    | 493.56  | 247.28          | 476.53         | 238.77           | 475.54         | 238.28           | 5  |
| 14 | 1308.57 | 654.79          | 1290.55        | 645.78           | C    | 422.48  | 211.74          | 405.45         | 203.23           | 404.47         | 202.74           | 4  |
| 15 | 1365.62 | 683.31          | 1347.60        | 674.30           | G    | 319.34  | 160.17          | 302.31         | 151.66           | 301.32         | 151.17           | 3  |
| 16 | 1452.69 | 726.85          | 1434.68        | 717.84           | S    | 262.29  | 131.65          | 245.26         | 123.13           | 244.27         | 122.64           | 2  |
| 17 |         |                 |                |                  | R    | 175.21  | 88.11           | 158.18         | 79.59            |                |                  | 1  |

Gene Symbol  
NONO

Sequences  
FACHSASLTVR

m/z  
596.56

Charge  
2+

Ion score  
62.3

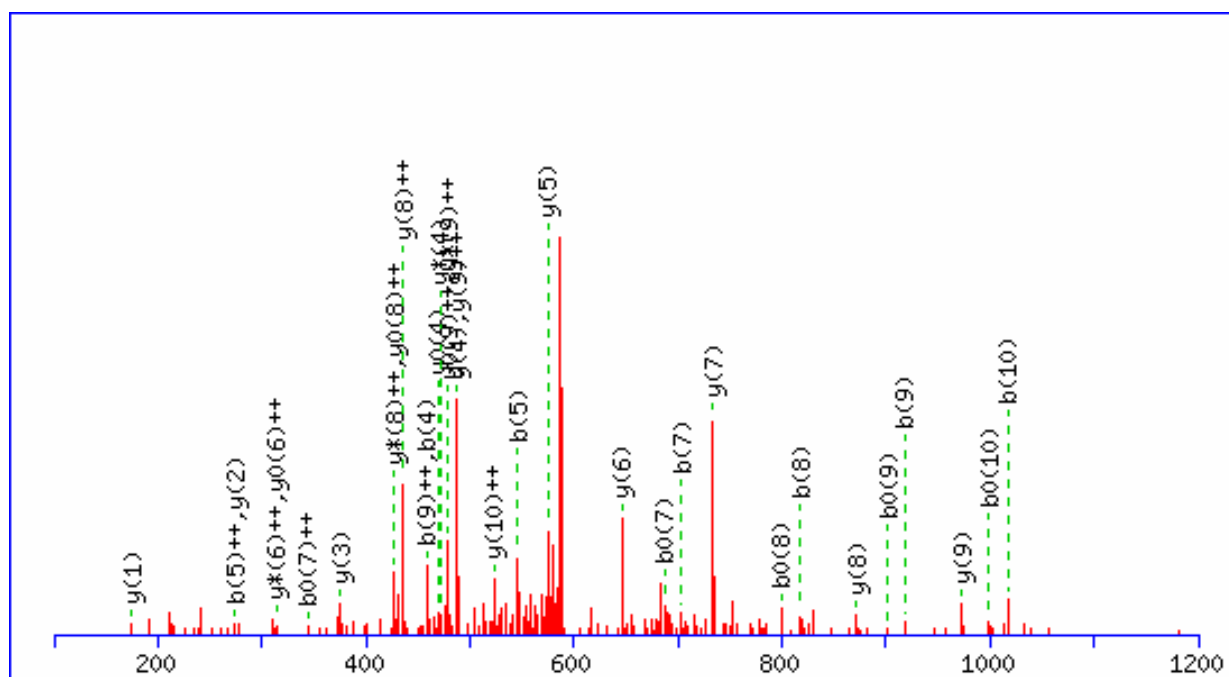

| #  | b       | b <sup>++</sup> | b <sup>0</sup> | b <sup>0++</sup> | Seq. | y       | y <sup>++</sup> | y*      | y <sup>+++</sup> | y <sup>0</sup> | y <sup>0++</sup> | #  |
|----|---------|-----------------|----------------|------------------|------|---------|-----------------|---------|------------------|----------------|------------------|----|
| 1  | 148.18  | 74.59           |                |                  | F    |         |                 |         |                  |                |                  | 11 |
| 2  | 219.26  | 110.13          |                |                  | A    | 1045.19 | 523.10          | 1028.16 | 514.59           | 1027.18        | 514.09           | 10 |
| 3  | 322.40  | 161.71          |                |                  | C    | 974.12  | 487.56          | 957.09  | 479.05           | 956.10         | 478.55           | 9  |
| 4  | 459.54  | 230.27          |                |                  | H    | 870.97  | 435.99          | 853.94  | 427.48           | 852.96         | 426.98           | 8  |
| 5  | 546.62  | 273.81          | 528.60         | 264.81           | S    | 733.83  | 367.42          | 716.80  | 358.91           | 715.82         | 358.41           | 7  |
| 6  | 617.70  | 309.35          | 599.68         | 300.34           | A    | 646.76  | 323.88          | 629.73  | 315.37           | 628.74         | 314.87           | 6  |
| 7  | 704.77  | 352.89          | 686.76         | 343.88           | S    | 575.68  | 288.34          | 558.65  | 279.83           | 557.66         | 279.34           | 5  |
| 8  | 817.93  | 409.47          | 799.92         | 400.46           | L    | 488.60  | 244.80          | 471.57  | 236.29           | 470.59         | 235.80           | 4  |
| 9  | 919.04  | 460.02          | 901.02         | 451.01           | T    | 375.44  | 188.23          | 358.41  | 179.71           | 357.43         | 179.22           | 3  |
| 10 | 1018.17 | 509.59          | 1000.15        | 500.58           | V    | 274.34  | 137.67          | 257.31  | 129.16           |                |                  | 2  |
| 11 |         |                 |                |                  | R    | 175.21  | 88.11           | 158.18  | 79.59            |                |                  | 1  |

Gene Symbol  
OXSM

Sequences  
LKGPNHAVSTAC**C**TTGAHAVGDSFR

m/z  
800.04

Charge  
3+

Ion score  
63.8

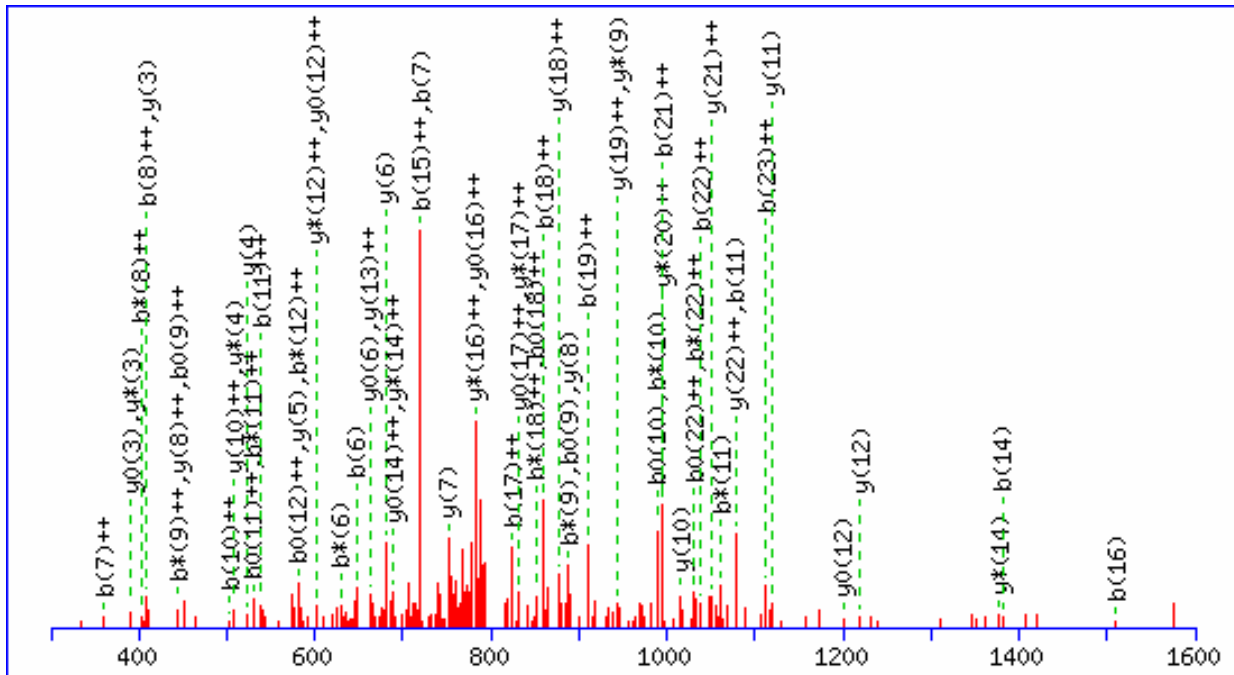

| #  | b       | b <sup>++</sup> | b <sup>+</sup> | b <sup>+++</sup> | b <sup>0</sup> | b <sup>0++</sup> | Seq. | y       | y <sup>++</sup> | y <sup>+</sup> | y <sup>+++</sup> | y <sup>0</sup> | y <sup>0++</sup> | #  |
|----|---------|-----------------|----------------|------------------|----------------|------------------|------|---------|-----------------|----------------|------------------|----------------|------------------|----|
| 1  | 114.17  | 57.59           |                |                  |                |                  | L    |         |                 |                |                  |                |                  | 24 |
| 2  | 242.34  | 121.67          | 225.31         | 113.16           |                |                  | K    | 2285.48 | 1143.24         | 2268.45        | 1134.73          | 2267.46        | 1134.23          | 23 |
| 3  | 299.39  | 150.20          | 282.36         | 141.68           |                |                  | G    | 2157.30 | 1079.16         | 2140.27        | 1070.64          | 2139.29        | 1070.15          | 22 |
| 4  | 396.50  | 198.76          | 379.47         | 190.24           |                |                  | P    | 2100.25 | 1050.63         | 2083.22        | 1042.11          | 2082.24        | 1041.62          | 21 |
| 5  | 510.61  | 255.81          | 493.58         | 247.29           |                |                  | N    | 2003.14 | 1002.07         | 1986.11        | 993.56           | 1985.12        | 993.06           | 20 |
| 6  | 647.75  | 324.38          | 630.72         | 315.86           |                |                  | H    | 1889.03 | 945.02          | 1872.00        | 936.51           | 1871.02        | 936.01           | 19 |
| 7  | 718.82  | 359.92          | 701.79         | 351.40           |                |                  | A    | 1751.90 | 876.45          | 1734.86        | 867.94           | 1733.88        | 867.44           | 18 |
| 8  | 817.96  | 409.48          | 800.92         | 400.97           |                |                  | V    | 1680.82 | 840.91          | 1663.79        | 832.40           | 1662.80        | 831.90           | 17 |
| 9  | 905.03  | 453.02          | 888.00         | 444.50           | 887.02         | 444.01           | S    | 1581.69 | 791.35          | 1564.66        | 782.83           | 1563.67        | 782.34           | 16 |
| 10 | 1006.14 | 503.57          | 989.11         | 495.06           | 988.12         | 494.56           | T    | 1494.61 | 747.81          | 1477.58        | 739.29           | 1476.59        | 738.80           | 15 |
| 11 | 1077.21 | 539.11          | 1060.18        | 530.60           | 1059.20        | 530.10           | A    | 1393.50 | 697.26          | 1376.47        | 688.74           | 1375.49        | 688.25           | 14 |
| 12 | 1180.36 | 590.68          | 1163.33        | 582.17           | 1162.34        | 581.67           | C    | 1322.43 | 661.72          | 1305.40        | 653.20           | 1304.41        | 652.71           | 13 |
| 13 | 1281.46 | 641.23          | 1264.43        | 632.72           | 1263.45        | 632.23           | T    | 1219.28 | 610.15          | 1202.25        | 601.63           | 1201.27        | 601.14           | 12 |
| 14 | 1382.57 | 691.79          | 1365.53        | 683.27           | 1364.55        | 682.78           | T    | 1118.18 | 559.59          | 1101.15        | 551.08           | 1100.16        | 550.59           | 11 |
| 15 | 1439.62 | 720.31          | 1422.59        | 711.80           | 1421.60        | 711.30           | G    | 1017.08 | 509.04          | 1000.05        | 500.53           | 999.06         | 500.03           | 10 |
| 16 | 1510.69 | 755.85          | 1493.66        | 747.34           | 1492.68        | 746.84           | A    | 960.03  | 480.52          | 942.99         | 472.00           | 942.01         | 471.51           | 9  |
| 17 | 1647.83 | 824.42          | 1630.80        | 815.91           | 1629.82        | 815.41           | H    | 888.95  | 444.98          | 871.92         | 436.46           | 870.93         | 435.97           | 8  |
| 18 | 1718.91 | 859.96          | 1701.88        | 851.44           | 1700.90        | 850.95           | A    | 751.81  | 376.41          | 734.78         | 367.89           | 733.79         | 367.40           | 7  |
| 19 | 1818.04 | 909.53          | 1801.01        | 901.01           | 1800.03        | 900.52           | V    | 680.73  | 340.87          | 663.70         | 332.35           | 662.71         | 331.86           | 6  |
| 20 | 1875.09 | 938.05          | 1858.06        | 929.54           | 1857.08        | 929.04           | G    | 581.60  | 291.30          | 564.57         | 282.79           | 563.58         | 282.30           | 5  |
| 21 | 1990.18 | 995.59          | 1973.15        | 987.08           | 1972.17        | 986.59           | D    | 524.55  | 262.78          | 507.52         | 254.26           | 506.53         | 253.77           | 4  |
| 22 | 2077.26 | 1039.13         | 2060.23        | 1030.62          | 2059.24        | 1030.13          | S    | 409.46  | 205.23          | 392.43         | 196.72           | 391.44         | 196.23           | 3  |
| 23 | 2224.43 | 1112.72         | 2207.40        | 1104.20          | 2206.42        | 1103.71          | F    | 322.38  | 161.70          | 305.35         | 153.18           |                |                  | 2  |
| 24 |         |                 |                |                  |                |                  | R    | 175.21  | 88.11           | 158.18         | 79.59            |                |                  | 1  |

Gene Symbol  
PCBP1

Sequences  
VMTIPYQMPASSPVICAGGQDR

m/z  
807.32

Charge  
3+

Ion score  
60.7

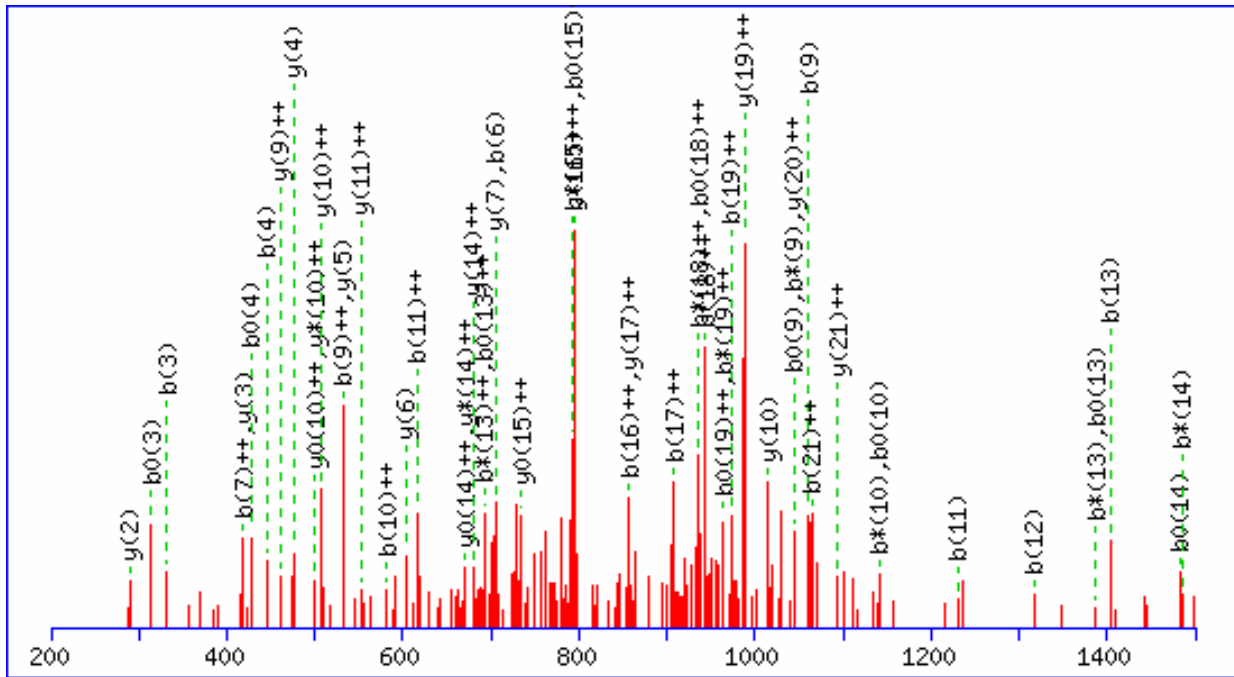

| #  | b       | b <sup>++</sup> | b <sup>+</sup> | b <sup>+++</sup> | b <sup>0</sup> | b <sup>0++</sup> | Seq. | y       | y <sup>++</sup> | y <sup>+</sup> | y <sup>+++</sup> | y <sup>0</sup> | y <sup>0++</sup> | #  |
|----|---------|-----------------|----------------|------------------|----------------|------------------|------|---------|-----------------|----------------|------------------|----------------|------------------|----|
| 1  | 100.14  | 50.57           |                |                  |                |                  | V    |         |                 |                |                  |                |                  | 23 |
| 2  | 231.34  | 116.17          |                |                  |                |                  | M    | 2320.69 | 1160.85         | 2303.66        | 1152.33          | 2302.67        | 1151.84          | 22 |
| 3  | 332.44  | 166.72          |                |                  | 314.42         | 157.72           | T    | 2189.49 | 1095.25         | 2172.46        | 1086.73          | 2171.48        | 1086.24          | 21 |
| 4  | 445.60  | 223.30          |                |                  | 427.58         | 214.29           | I    | 2088.39 | 1044.70         | 2071.36        | 1036.18          | 2070.37        | 1035.69          | 20 |
| 5  | 542.71  | 271.86          |                |                  | 524.70         | 262.85           | P    | 1975.23 | 988.12          | 1958.20        | 979.60           | 1957.21        | 979.11           | 19 |
| 6  | 705.89  | 353.45          |                |                  | 687.87         | 344.44           | Y    | 1878.11 | 939.56          | 1861.08        | 931.05           | 1860.10        | 930.55           | 18 |
| 7  | 834.01  | 417.51          | 816.98         | 409.00           | 816.00         | 408.50           | Q    | 1714.94 | 857.97          | 1697.91        | 849.46           | 1696.93        | 848.97           | 17 |
| 8  | 931.13  | 466.07          | 914.10         | 457.55           | 913.11         | 457.06           | P    | 1586.81 | 793.91          | 1569.78        | 785.39           | 1568.80        | 784.90           | 16 |
| 9  | 1062.33 | 531.67          | 1045.30        | 523.15           | 1044.31        | 522.66           | M    | 1489.70 | 745.35          | 1472.67        | 736.84           | 1471.68        | 736.34           | 15 |
| 10 | 1159.44 | 580.22          | 1142.41        | 571.71           | 1141.43        | 571.22           | P    | 1358.50 | 679.75          | 1341.47        | 671.24           | 1340.49        | 670.75           | 14 |
| 11 | 1230.52 | 615.76          | 1213.49        | 607.25           | 1212.50        | 606.76           | A    | 1261.39 | 631.20          | 1244.35        | 622.68           | 1243.37        | 622.19           | 13 |
| 12 | 1317.60 | 659.30          | 1300.57        | 650.79           | 1299.58        | 650.29           | S    | 1190.31 | 595.66          | 1173.28        | 587.14           | 1172.29        | 586.65           | 12 |
| 13 | 1404.67 | 702.84          | 1387.64        | 694.33           | 1386.66        | 693.83           | S    | 1103.23 | 552.12          | 1086.20        | 543.60           | 1085.21        | 543.11           | 11 |
| 14 | 1501.79 | 751.40          | 1484.76        | 742.88           | 1483.77        | 742.39           | P    | 1016.15 | 508.58          | 999.12         | 500.07           | 998.14         | 499.57           | 10 |
| 15 | 1600.92 | 800.96          | 1583.89        | 792.45           | 1582.90        | 791.96           | V    | 919.04  | 460.02          | 902.01         | 451.51           | 901.02         | 451.02           | 9  |
| 16 | 1714.08 | 857.54          | 1697.05        | 849.03           | 1696.06        | 848.53           | I    | 819.91  | 410.46          | 802.88         | 401.94           | 801.89         | 401.45           | 8  |
| 17 | 1817.22 | 909.11          | 1800.19        | 900.60           | 1799.20        | 900.11           | C    | 706.75  | 353.88          | 689.72         | 345.36           | 688.73         | 344.87           | 7  |
| 18 | 1888.30 | 944.65          | 1871.27        | 936.14           | 1870.28        | 935.65           | A    | 603.61  | 302.31          | 586.58         | 293.79           | 585.59         | 293.30           | 6  |
| 19 | 1945.35 | 973.18          | 1928.32        | 964.66           | 1927.33        | 964.17           | G    | 532.53  | 266.77          | 515.50         | 258.25           | 514.51         | 257.76           | 5  |
| 20 | 2002.40 | 1001.70         | 1985.37        | 993.19           | 1984.39        | 992.70           | G    | 475.48  | 238.24          | 458.45         | 229.73           | 457.46         | 229.23           | 4  |
| 21 | 2130.53 | 1065.77         | 2113.50        | 1057.25          | 2112.51        | 1056.76          | Q    | 418.43  | 209.72          | 401.39         | 201.20           | 400.41         | 200.71           | 3  |
| 22 | 2245.62 | 1123.31         | 2228.59        | 1114.80          | 2227.60        | 1114.30          | D    | 290.30  | 145.65          | 273.27         | 137.14           | 272.28         | 136.64           | 2  |
| 23 |         |                 |                |                  |                |                  | R    | 175.21  | 88.11           | 158.18         | 79.59            |                |                  | 1  |



Gene Symbol  
PKP2

Sequences  
NIQTDNNSIG**C**FGSR

m/z  
877.89

Charge  
2+

Ion score  
83.6

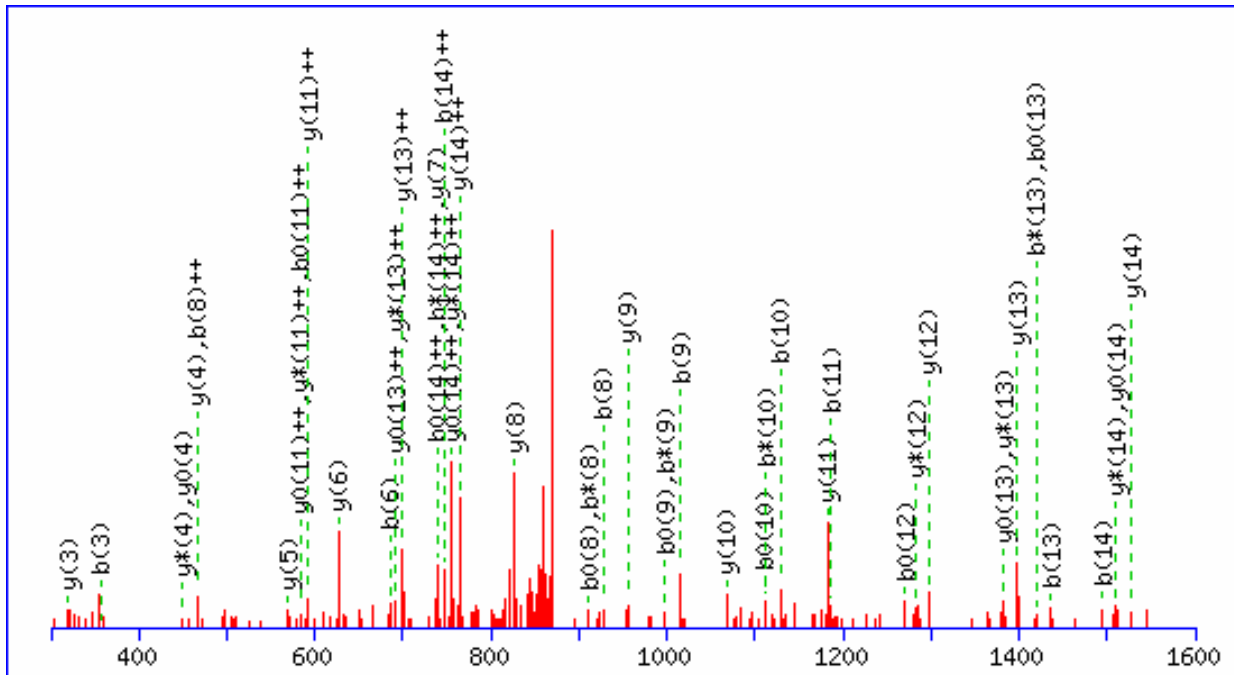

| #  | b              | b <sup>++</sup> | b <sup>*</sup> | b <sup>+++</sup> | b <sup>0</sup> | b <sup>0++</sup> | Seq. | y              | y <sup>++</sup> | y <sup>*</sup> | y <sup>+++</sup> | y <sup>0</sup> | y <sup>0++</sup> | #  |
|----|----------------|-----------------|----------------|------------------|----------------|------------------|------|----------------|-----------------|----------------|------------------|----------------|------------------|----|
| 1  | 115.11         | 58.06           | 98.08          | 49.54            |                |                  | N    |                |                 |                |                  |                |                  | 16 |
| 2  | 228.27         | 114.64          | 211.24         | 106.12           |                |                  | I    | 1640.80        | 820.90          | 1623.77        | 812.39           | 1622.78        | 811.89           | 15 |
| 3  | <b>356.40</b>  | 178.70          | 339.37         | 170.19           |                |                  | Q    | <b>1527.64</b> | <b>764.32</b>   | <b>1510.61</b> | <b>755.81</b>    | <b>1509.62</b> | <b>755.32</b>    | 14 |
| 4  | 457.50         | 229.25          | 440.47         | 220.74           | 439.49         | 220.25           | T    | <b>1399.51</b> | <b>700.26</b>   | <b>1382.48</b> | <b>691.74</b>    | <b>1381.49</b> | <b>691.25</b>    | 13 |
| 5  | 572.59         | 286.80          | 555.56         | 278.28           | 554.57         | 277.79           | D    | <b>1298.41</b> | 649.71          | <b>1281.37</b> | 641.19           | 1280.39        | 640.70           | 12 |
| 6  | <b>686.69</b>  | 343.85          | 669.66         | 335.33           | 668.68         | 334.84           | N    | <b>1183.32</b> | <b>592.16</b>   | 1166.29        | <b>583.65</b>    | 1165.30        | <b>583.16</b>    | 11 |
| 7  | 800.79         | 400.90          | 783.76         | 392.39           | 782.78         | 391.89           | N    | <b>1069.22</b> | 535.11          | 1052.18        | 526.60           | 1051.20        | 526.10           | 10 |
| 8  | <b>928.97</b>  | <b>464.99</b>   | <b>911.94</b>  | 456.47           | <b>910.95</b>  | 455.98           | K    | <b>955.11</b>  | 478.06          | 938.08         | 469.55           | 937.10         | 469.05           | 9  |
| 9  | <b>1016.04</b> | 508.53          | <b>999.01</b>  | 500.01           | <b>998.03</b>  | 499.52           | S    | <b>826.94</b>  | 413.97          | 809.91         | 405.46           | 808.93         | 404.97           | 8  |
| 10 | <b>1129.20</b> | 565.10          | <b>1112.17</b> | 556.59           | <b>1111.19</b> | 556.10           | I    | <b>739.86</b>  | 370.44          | 722.83         | 361.92           | 721.85         | 361.43           | 7  |
| 11 | <b>1186.25</b> | 593.63          | 1169.22        | 585.11           | 1168.24        | <b>584.62</b>    | G    | <b>626.71</b>  | 313.86          | 609.68         | 305.34           | 608.69         | 304.85           | 6  |
| 12 | 1289.40        | 645.20          | 1272.36        | 636.69           | <b>1271.38</b> | 636.19           | C    | <b>569.65</b>  | 285.33          | 552.62         | 276.82           | 551.64         | 276.32           | 5  |
| 13 | <b>1436.57</b> | 718.79          | <b>1419.54</b> | 710.27           | <b>1418.55</b> | 709.78           | F    | <b>466.51</b>  | 233.76          | <b>449.48</b>  | 225.24           | <b>448.50</b>  | 224.75           | 4  |
| 14 | <b>1493.62</b> | <b>747.31</b>   | 1476.59        | <b>738.80</b>    | 1475.61        | <b>738.31</b>    | G    | <b>319.34</b>  | 160.17          | 302.31         | 151.66           | 301.32         | 151.17           | 3  |
| 15 | 1580.70        | 790.85          | 1563.67        | 782.34           | 1562.68        | 781.85           | S    | 262.29         | 131.65          | 245.26         | 123.13           | 244.27         | 122.64           | 2  |
| 16 |                |                 |                |                  |                |                  | R    | 175.21         | 88.11           | 158.18         | 79.59            |                |                  | 1  |

Gene Symbol  
PKP3

Sequences  
DLGAPPGEVVG**C**FTPQSR

m/z  
951.32

Charge  
2+

Ion score  
58.7

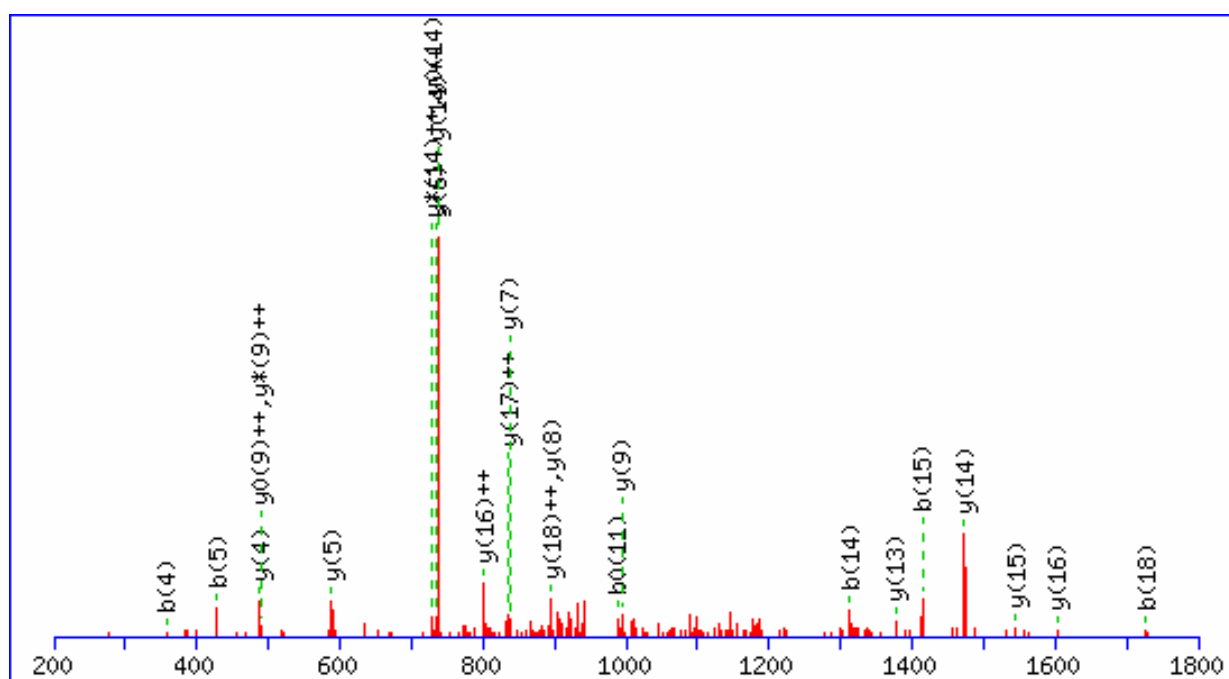

| #  | b              | b <sup>++</sup> | b <sup>*</sup> | b <sup>*++</sup> | b <sup>0</sup> | b <sup>0++</sup> | Seq. | y              | y <sup>++</sup> | y <sup>*</sup> | y <sup>*++</sup> | y <sup>0</sup> | y <sup>0++</sup> | #  |
|----|----------------|-----------------|----------------|------------------|----------------|------------------|------|----------------|-----------------|----------------|------------------|----------------|------------------|----|
| 1  | 116.10         | 58.55           |                |                  | 98.08          | 49.54            | D    |                |                 |                |                  |                |                  | 19 |
| 2  | 229.25         | 115.13          |                |                  | 211.24         | 106.12           | L    | 1787.03        | <b>894.02</b>   | 1769.99        | 885.50           | 1769.01        | 885.01           | 18 |
| 3  | 300.33         | 150.67          |                |                  | 282.32         | 141.66           | A    | 1673.87        | <b>837.44</b>   | 1656.84        | 828.92           | 1655.85        | 828.43           | 17 |
| 4  | <b>357.38</b>  | 179.20          |                |                  | 339.37         | 170.19           | G    | <b>1602.79</b> | <b>801.90</b>   | 1585.76        | 793.38           | 1584.77        | 792.89           | 16 |
| 5  | <b>428.46</b>  | 214.73          |                |                  | 410.44         | 205.73           | A    | <b>1545.74</b> | 773.37          | 1528.71        | 764.86           | 1527.72        | 764.37           | 15 |
| 6  | 525.58         | 263.29          |                |                  | 507.56         | 254.28           | P    | <b>1474.66</b> | <b>737.83</b>   | 1457.63        | <b>729.32</b>    | 1456.65        | <b>728.83</b>    | 14 |
| 7  | 622.69         | 311.85          |                |                  | 604.68         | 302.84           | P    | <b>1377.55</b> | 689.28          | 1360.51        | 680.76           | 1359.53        | 680.27           | 13 |
| 8  | 679.74         | 340.37          |                |                  | 661.73         | 331.37           | G    | 1280.43        | 640.72          | 1263.40        | 632.20           | 1262.41        | 631.71           | 12 |
| 9  | 808.86         | 404.93          |                |                  | 790.84         | 395.92           | E    | 1223.38        | 612.19          | 1206.35        | 603.68           | 1205.36        | 603.19           | 11 |
| 10 | 907.99         | 454.50          |                |                  | 889.97         | 445.49           | V    | 1094.26        | 547.64          | 1077.23        | 539.12           | 1076.25        | 538.63           | 10 |
| 11 | 1007.12        | 504.06          |                |                  | <b>989.10</b>  | 495.06           | V    | <b>995.13</b>  | 498.07          | 978.10         | <b>489.56</b>    | 977.12         | <b>489.06</b>    | 9  |
| 12 | 1064.17        | 532.59          |                |                  | 1046.15        | 523.58           | G    | <b>896.00</b>  | 448.51          | 878.97         | 439.99           | 877.99         | 439.50           | 8  |
| 13 | 1167.31        | 584.16          |                |                  | 1149.30        | 575.15           | C    | <b>838.95</b>  | 419.98          | 821.92         | 411.46           | 820.94         | 410.97           | 7  |
| 14 | <b>1314.49</b> | 657.75          |                |                  | 1296.47        | 648.74           | F    | <b>735.81</b>  | 368.41          | 718.78         | 359.89           | 717.79         | 359.40           | 6  |
| 15 | <b>1415.59</b> | 708.30          |                |                  | 1397.57        | 699.29           | T    | <b>588.63</b>  | 294.82          | 571.60         | 286.31           | 570.62         | 285.81           | 5  |
| 16 | 1512.71        | 756.86          |                |                  | 1494.69        | 747.85           | P    | <b>487.53</b>  | 244.27          | 470.50         | 235.75           | 469.52         | 235.26           | 4  |
| 17 | 1640.83        | 820.92          | 1623.80        | 812.41           | 1622.82        | 811.91           | Q    | 390.42         | 195.71          | 373.38         | 187.20           | 372.40         | 186.70           | 3  |
| 18 | <b>1727.91</b> | 864.46          | 1710.88        | 855.94           | 1709.90        | 855.45           | S    | 262.29         | 131.65          | 245.26         | 123.13           | 244.27         | 122.64           | 2  |
| 19 |                |                 |                |                  |                |                  | R    | 175.21         | 88.11           | 158.18         | 79.59            |                |                  | 1  |

Gene Symbol  
PLP2

Sequences  
ADSERLSAPG**C**WAA**C**TNFSR

m/z  
729.58

Charge  
3+

Ion score  
62.3

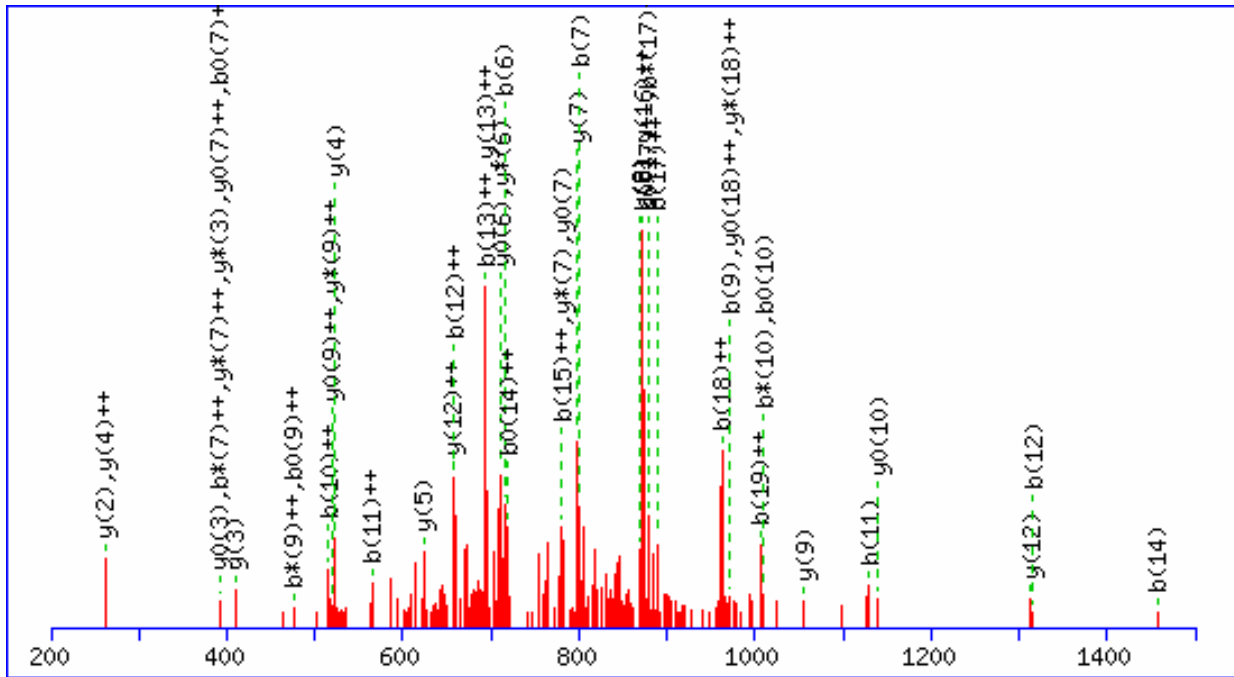

N-term : N-Acetyl (Protein)

| #  | b              | b <sup>++</sup> | b <sup>*</sup> | b <sup>+++</sup> | b <sup>0</sup> | b <sup>0++</sup> | Seq. | y              | y <sup>++</sup> | y <sup>*</sup> | y <sup>+++</sup> | y <sup>0</sup> | y <sup>0++</sup> | #  |
|----|----------------|-----------------|----------------|------------------|----------------|------------------|------|----------------|-----------------|----------------|------------------|----------------|------------------|----|
| 1  | 114.12         | 57.57           |                |                  |                |                  | A    |                |                 |                |                  |                |                  | 20 |
| 2  | 229.21         | 115.11          |                |                  | 211.19         | 106.10           | D    | 2072.26        | 1036.63         | 2055.23        | 1028.12          | 2054.25        | 1027.63          | 19 |
| 3  | 316.29         | 158.65          |                |                  | 298.27         | 149.64           | S    | 1957.17        | 979.09          | 1940.14        | <b>970.58</b>    | 1939.16        | <b>970.08</b>    | 18 |
| 4  | 445.40         | 223.20          |                |                  | 427.39         | 214.20           | E    | 1870.10        | 935.55          | 1853.07        | 927.04           | 1852.08        | 926.54           | 17 |
| 5  | 601.59         | 301.30          | 584.56         | 292.78           | 583.57         | 292.29           | R    | 1740.98        | <b>871.00</b>   | 1723.95        | 862.48           | 1722.97        | 861.99           | 16 |
| 6  | <b>714.74</b>  | 357.88          | 697.71         | 349.36           | 696.73         | 348.87           | L    | 1584.80        | 792.90          | 1567.77        | 784.39           | 1566.78        | 783.90           | 15 |
| 7  | <b>801.82</b>  | 401.41          | 784.79         | <b>392.90</b>    | 783.81         | <b>392.41</b>    | S    | 1471.64        | 736.32          | 1454.61        | 727.81           | 1453.62        | 727.32           | 14 |
| 8  | <b>872.90</b>  | 436.95          | 855.87         | 428.44           | 854.88         | 427.95           | A    | 1384.56        | <b>692.79</b>   | 1367.53        | 684.27           | 1366.55        | 683.78           | 13 |
| 9  | <b>970.01</b>  | 485.51          | 952.98         | <b>477.00</b>    | 952.00         | <b>476.50</b>    | P    | <b>1313.48</b> | <b>657.25</b>   | 1296.45        | 648.73           | 1295.47        | 648.24           | 12 |
| 10 | 1027.07        | <b>514.04</b>   | <b>1010.04</b> | 505.52           | <b>1009.05</b> | 505.03           | G    | 1216.37        | 608.69          | 1199.34        | 600.17           | 1198.35        | 599.68           | 11 |
| 11 | <b>1130.21</b> | <b>565.61</b>   | 1113.18        | 557.09           | 1112.19        | 556.60           | C    | 1159.32        | 580.16          | 1142.29        | 571.65           | <b>1141.30</b> | 571.16           | 10 |
| 12 | <b>1316.42</b> | <b>658.71</b>   | 1299.39        | 650.20           | 1298.40        | 649.71           | W    | <b>1056.18</b> | 528.59          | 1039.14        | <b>520.08</b>    | 1038.16        | <b>519.58</b>    | 9  |
| 13 | 1387.50        | <b>694.25</b>   | 1370.47        | 685.74           | 1369.48        | 685.24           | A    | <b>869.97</b>  | 435.49          | 852.93         | 426.97           | 851.95         | 426.48           | 8  |
| 14 | <b>1458.57</b> | 729.79          | 1441.54        | 721.28           | 1440.56        | <b>720.78</b>    | A    | <b>798.89</b>  | 399.95          | <b>781.86</b>  | <b>391.43</b>    | <b>780.87</b>  | <b>390.94</b>    | 7  |
| 15 | 1561.72        | <b>781.36</b>   | 1544.69        | 772.85           | 1543.70        | 772.36           | C    | 727.81         | 364.41          | <b>710.78</b>  | 355.89           | <b>709.79</b>  | 355.40           | 6  |
| 16 | 1662.82        | 831.91          | 1645.79        | 823.40           | 1644.81        | 822.91           | T    | <b>624.67</b>  | 312.84          | 607.64         | 304.32           | 606.65         | 303.83           | 5  |
| 17 | 1776.92        | <b>888.97</b>   | 1759.89        | <b>880.45</b>    | 1758.91        | <b>879.96</b>    | N    | <b>523.56</b>  | <b>262.29</b>   | 506.53         | 253.77           | 505.55         | 253.28           | 4  |
| 18 | 1924.10        | <b>962.55</b>   | 1907.07        | 954.04           | 1906.08        | 953.55           | F    | <b>409.46</b>  | 205.23          | <b>392.43</b>  | 196.72           | <b>391.44</b>  | 196.23           | 3  |
| 19 | 2011.18        | <b>1006.09</b>  | 1994.14        | 997.58           | 1993.16        | 997.08           | S    | <b>262.29</b>  | 131.65          | 245.26         | 123.13           | 244.27         | 122.64           | 2  |
| 20 |                |                 |                |                  |                |                  | R    | 175.21         | 88.11           | 158.18         | 79.59            |                |                  | 1  |

Gene Symbol  
PLSCR1

Sequences  
VYFAAEDTD**C**CTR

m/z  
809.69

Charge  
2+

Ion score  
46.0

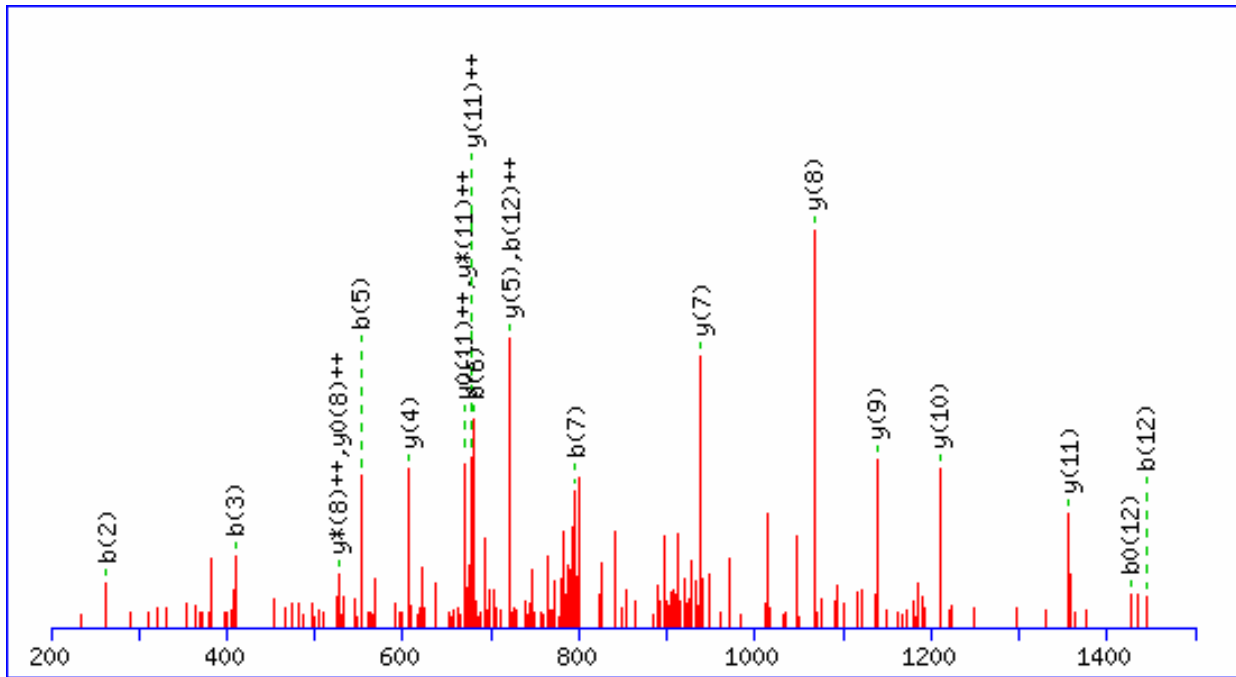

**C11** : NEM (C)

| #  | b              | b <sup>++</sup> | b <sup>0</sup> | b <sup>0++</sup> | Seq. | y              | y <sup>++</sup> | y <sup>*</sup> | y <sup>*++</sup> | y <sup>0</sup> | y <sup>0++</sup> | #  |
|----|----------------|-----------------|----------------|------------------|------|----------------|-----------------|----------------|------------------|----------------|------------------|----|
| 1  | 100.14         | 50.57           |                |                  | V    |                |                 |                |                  |                |                  | 13 |
| 2  | <b>263.31</b>  | 132.16          |                |                  | Y    | 1520.62        | 760.81          | 1503.59        | 752.30           | 1502.60        | 751.81           | 12 |
| 3  | <b>410.49</b>  | 205.75          |                |                  | F    | <b>1357.45</b> | <b>679.23</b>   | 1340.42        | <b>670.71</b>    | 1339.43        | <b>670.22</b>    | 11 |
| 4  | 481.56         | 241.29          |                |                  | A    | <b>1210.27</b> | 605.64          | 1193.24        | 597.12           | 1192.26        | 596.63           | 10 |
| 5  | <b>552.64</b>  | 276.82          |                |                  | A    | <b>1139.19</b> | 570.10          | 1122.16        | 561.59           | 1121.18        | 561.09           | 9  |
| 6  | <b>681.76</b>  | 341.38          | 663.74         | 332.37           | E    | <b>1068.12</b> | 534.56          | 1051.09        | <b>526.05</b>    | 1050.10        | <b>525.55</b>    | 8  |
| 7  | <b>796.84</b>  | 398.93          | 778.83         | 389.92           | D    | <b>939.00</b>  | 470.01          | 921.97         | 461.49           | 920.99         | 461.00           | 7  |
| 8  | 897.95         | 449.48          | 879.93         | 440.47           | T    | 823.92         | 412.46          | 806.88         | 403.95           | 805.90         | 403.45           | 6  |
| 9  | 1013.03        | 507.02          | 995.02         | 498.01           | D    | <b>722.81</b>  | 361.91          | 705.78         | 353.39           | 704.80         | 352.90           | 5  |
| 10 | 1116.18        | 558.59          | 1098.16        | 549.59           | C    | <b>607.72</b>  | 304.37          | 590.69         | 295.85           | 589.71         | 295.36           | 4  |
| 11 | 1344.45        | 672.73          | 1326.43        | 663.72           | C    | 504.58         | 252.79          | 487.55         | 244.28           | 486.57         | 243.79           | 3  |
| 12 | <b>1445.55</b> | <b>723.28</b>   | <b>1427.53</b> | 714.27           | T    | 276.31         | 138.66          | 259.28         | 130.15           | 258.30         | 129.65           | 2  |
| 13 |                |                 |                |                  | R    | 175.21         | 88.11           | 158.18         | 79.59            |                |                  | 1  |

Gene Symbol  
PLSCR1

Sequences  
VYFAAEDTDCCTR

m/z  
810.14

Charge  
2+

Ion score  
83.6

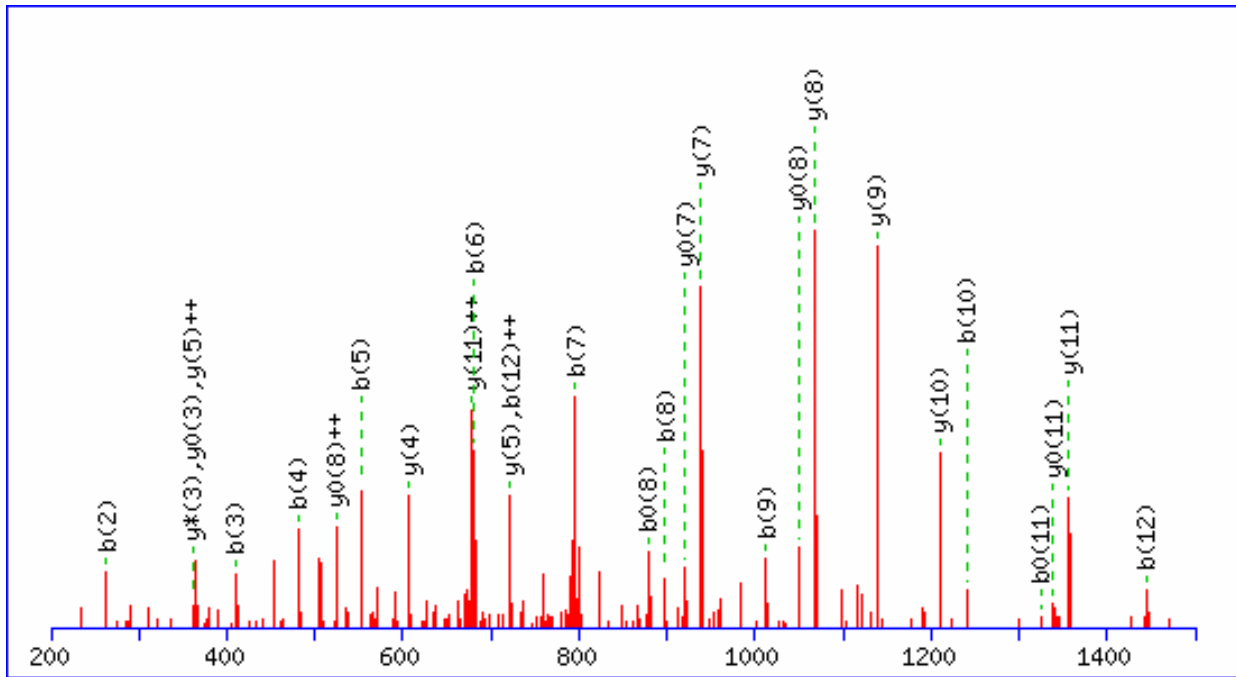

C10 : NEM (C)

| #  | b              | b <sup>++</sup> | b <sup>0</sup> | b <sup>0++</sup> | Seq. | y              | y <sup>++</sup> | y <sup>*</sup> | y <sup>*++</sup> | y <sup>0</sup> | y <sup>0++</sup> | #  |
|----|----------------|-----------------|----------------|------------------|------|----------------|-----------------|----------------|------------------|----------------|------------------|----|
| 1  | 100.14         | 50.57           |                |                  | V    |                |                 |                |                  |                |                  | 13 |
| 2  | <b>263.31</b>  | 132.16          |                |                  | Y    | 1520.62        | 760.81          | 1503.59        | 752.30           | 1502.60        | 751.81           | 12 |
| 3  | <b>410.49</b>  | 205.75          |                |                  | F    | <b>1357.45</b> | <b>679.23</b>   | 1340.42        | 670.71           | <b>1339.43</b> | 670.22           | 11 |
| 4  | <b>481.56</b>  | 241.29          |                |                  | A    | <b>1210.27</b> | 605.64          | 1193.24        | 597.12           | 1192.26        | 596.63           | 10 |
| 5  | <b>552.64</b>  | 276.82          |                |                  | A    | <b>1139.19</b> | 570.10          | 1122.16        | 561.59           | 1121.18        | 561.09           | 9  |
| 6  | <b>681.76</b>  | 341.38          | 663.74         | 332.37           | E    | <b>1068.12</b> | 534.56          | 1051.09        | 526.05           | <b>1050.10</b> | <b>525.55</b>    | 8  |
| 7  | <b>796.84</b>  | 398.93          | 778.83         | 389.92           | D    | <b>939.00</b>  | 470.01          | 921.97         | 461.49           | <b>920.99</b>  | 461.00           | 7  |
| 8  | <b>897.95</b>  | 449.48          | <b>879.93</b>  | 440.47           | T    | 823.92         | 412.46          | 806.88         | 403.95           | 805.90         | 403.45           | 6  |
| 9  | <b>1013.03</b> | 507.02          | 995.02         | 498.01           | D    | <b>722.81</b>  | <b>361.91</b>   | 705.78         | 353.39           | 704.80         | 352.90           | 5  |
| 10 | <b>1241.30</b> | 621.16          | 1223.29        | 612.15           | C    | <b>607.72</b>  | 304.37          | 590.69         | 295.85           | 589.71         | 295.36           | 4  |
| 11 | 1344.45        | 672.73          | <b>1326.43</b> | 663.72           | C    | 379.46         | 190.23          | <b>362.43</b>  | 181.72           | <b>361.44</b>  | 181.22           | 3  |
| 12 | <b>1445.55</b> | <b>723.28</b>   | 1427.53        | 714.27           | T    | 276.31         | 138.66          | 259.28         | 130.15           | 258.30         | 129.65           | 2  |
| 13 |                |                 |                |                  | R    | 175.21         | 88.11           | 158.18         | 79.59            |                |                  | 1  |

Gene Symbol  
PLSCR1

Sequences  
VYFAAEDTD**CC**TR

m/z  
747.46

Charge  
2+

Ion score  
105.1

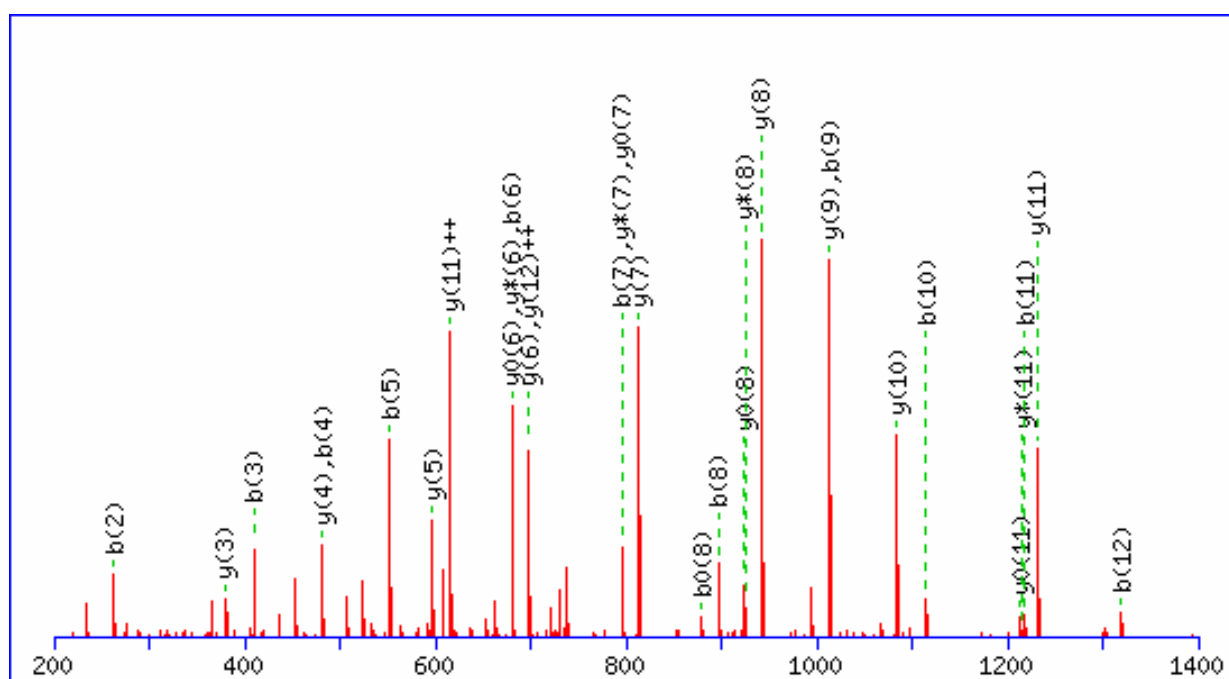

| #  | b              | b <sup>++</sup> | b <sup>0</sup> | b <sup>0++</sup> | Seq. | y              | y <sup>++</sup> | y <sup>*</sup> | y <sup>+++</sup> | y <sup>0</sup> | y <sup>0++</sup> | #  |
|----|----------------|-----------------|----------------|------------------|------|----------------|-----------------|----------------|------------------|----------------|------------------|----|
| 1  | 100.14         | 50.57           |                |                  | V    |                |                 |                |                  |                |                  | 13 |
| 2  | <b>263.31</b>  | 132.16          |                |                  | Y    | 1395.49        | <b>698.25</b>   | 1378.46        | 689.74           | 1377.48        | 689.24           | 12 |
| 3  | <b>410.49</b>  | 205.75          |                |                  | F    | <b>1232.32</b> | <b>616.66</b>   | <b>1215.29</b> | 608.15           | <b>1214.31</b> | 607.66           | 11 |
| 4  | <b>481.56</b>  | 241.29          |                |                  | A    | <b>1085.15</b> | 543.08          | 1068.12        | 534.56           | 1067.13        | 534.07           | 10 |
| 5  | <b>552.64</b>  | 276.82          |                |                  | A    | <b>1014.07</b> | 507.54          | 997.04         | 499.02           | 996.05         | 498.53           | 9  |
| 6  | <b>681.76</b>  | 341.38          | 663.74         | 332.37           | E    | <b>942.99</b>  | 472.00          | <b>925.96</b>  | 463.48           | <b>924.98</b>  | 462.99           | 8  |
| 7  | <b>796.84</b>  | 398.93          | 778.83         | 389.92           | D    | <b>813.88</b>  | 407.44          | <b>796.85</b>  | 398.93           | <b>795.86</b>  | 398.43           | 7  |
| 8  | <b>897.95</b>  | 449.48          | <b>879.93</b>  | 440.47           | T    | <b>698.79</b>  | 349.90          | <b>681.76</b>  | 341.38           | <b>680.77</b>  | 340.89           | 6  |
| 9  | <b>1013.03</b> | 507.02          | 995.02         | 498.01           | D    | <b>597.69</b>  | 299.35          | 580.66         | 290.83           | 579.67         | 290.34           | 5  |
| 10 | <b>1116.18</b> | 558.59          | 1098.16        | 549.59           | C    | <b>482.60</b>  | 241.80          | 465.57         | 233.29           | 464.58         | 232.80           | 4  |
| 11 | <b>1219.32</b> | 610.16          | 1201.31        | 601.16           | C    | <b>379.46</b>  | 190.23          | 362.43         | 181.72           | 361.44         | 181.22           | 3  |
| 12 | <b>1320.42</b> | 660.72          | 1302.41        | 651.71           | T    | 276.31         | 138.66          | 259.28         | 130.15           | 258.30         | 129.65           | 2  |
| 13 |                |                 |                |                  | R    | 175.21         | 88.11           | 158.18         | 79.59            |                |                  | 1  |

Gene Symbol  
PLSCR3

Sequences  
SGAGQLGQAAEESN**C**AR

m/z  
987.72

Charge  
2+

Ion score  
95.9

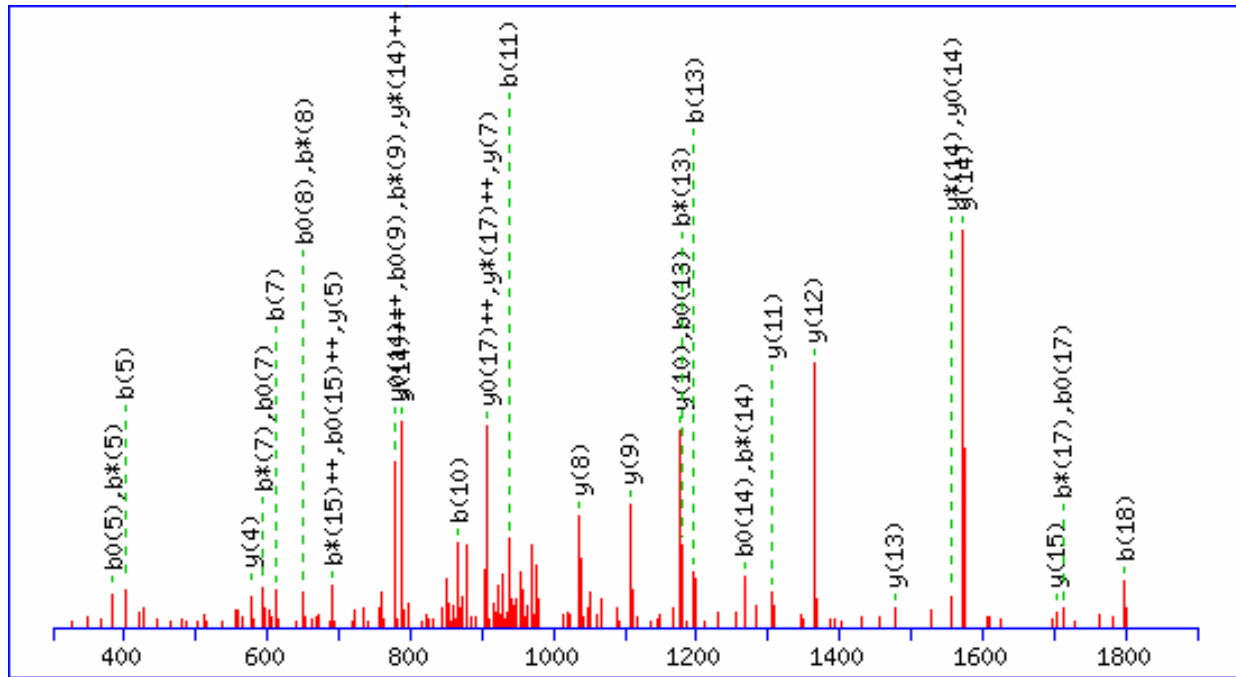

C17 : NEM (C)

| #  | b              | b <sup>++</sup> | b <sup>*</sup> | b <sup>*++</sup> | b <sup>0</sup> | b <sup>0++</sup> | Seq. | y              | y <sup>++</sup> | y <sup>*</sup> | y <sup>*++</sup> | y <sup>0</sup> | y <sup>0++</sup> | #  |
|----|----------------|-----------------|----------------|------------------|----------------|------------------|------|----------------|-----------------|----------------|------------------|----------------|------------------|----|
| 1  | 88.09          | 44.55           |                |                  | 70.07          | 35.54            | S    |                |                 |                |                  |                |                  | 19 |
| 2  | 145.14         | 73.07           |                |                  | 127.12         | 64.06            | G    | 1888.02        | 944.52          | 1870.99        | 936.00           | 1870.01        | 935.51           | 18 |
| 3  | 216.21         | 108.61          |                |                  | 198.20         | 99.60            | A    | 1830.97        | 915.99          | 1813.94        | <b>907.48</b>    | 1812.96        | <b>906.98</b>    | 17 |
| 4  | 273.27         | 137.14          |                |                  | 255.25         | 128.13           | G    | 1759.90        | 880.45          | 1742.86        | 871.94           | 1741.88        | 871.44           | 16 |
| 5  | <b>401.39</b>  | 201.20          | <b>384.36</b>  | 192.69           | <b>383.38</b>  | 192.19           | Q    | <b>1702.84</b> | 851.93          | 1685.81        | 843.41           | 1684.83        | 842.92           | 15 |
| 6  | 498.51         | 249.76          | 481.48         | 241.24           | 480.49         | 240.75           | P    | <b>1574.71</b> | <b>787.86</b>   | <b>1557.68</b> | <b>779.35</b>    | <b>1556.70</b> | <b>778.85</b>    | 14 |
| 7  | <b>611.67</b>  | 306.34          | <b>594.64</b>  | 297.82           | <b>593.65</b>  | 297.33           | L    | <b>1477.60</b> | 739.30          | 1460.57        | 730.79           | 1459.58        | 730.30           | 13 |
| 8  | 668.72         | 334.86          | <b>651.69</b>  | 326.35           | <b>650.70</b>  | 325.86           | G    | <b>1364.44</b> | 682.73          | 1347.41        | 674.21           | 1346.43        | 673.72           | 12 |
| 9  | 796.85         | 398.93          | <b>779.82</b>  | 390.41           | <b>778.83</b>  | 389.92           | Q    | <b>1307.39</b> | 654.20          | 1290.36        | 645.68           | 1289.38        | 645.19           | 11 |
| 10 | <b>867.93</b>  | 434.47          | 850.90         | 425.95           | 849.91         | 425.46           | A    | <b>1179.26</b> | 590.13          | 1162.23        | 581.62           | 1161.25        | 581.13           | 10 |
| 11 | <b>939.00</b>  | 470.01          | 921.97         | 461.49           | 920.99         | 461.00           | A    | <b>1108.18</b> | 554.60          | 1091.15        | 546.08           | 1090.17        | 545.59           | 9  |
| 12 | 1068.12        | 534.56          | 1051.09        | 526.05           | 1050.10        | 525.56           | E    | <b>1037.11</b> | 519.06          | 1020.08        | 510.54           | 1019.09        | 510.05           | 8  |
| 13 | <b>1197.23</b> | 599.12          | <b>1180.20</b> | 590.60           | <b>1179.22</b> | 590.11           | E    | <b>907.99</b>  | 454.50          | 890.96         | 445.98           | 889.98         | 445.49           | 7  |
| 14 | 1284.31        | 642.66          | <b>1267.28</b> | 634.14           | <b>1266.29</b> | 633.65           | S    | <b>778.88</b>  | 389.94          | 761.85         | 381.43           | 760.86         | 380.94           | 6  |
| 15 | 1398.41        | 699.71          | 1381.38        | <b>691.19</b>    | 1380.40        | <b>690.70</b>    | N    | <b>691.80</b>  | 346.40          | 674.77         | 337.89           |                |                  | 5  |
| 16 | 1501.55        | 751.28          | 1484.52        | 742.77           | 1483.54        | 742.27           | C    | <b>577.70</b>  | 289.35          | 560.67         | 280.84           |                |                  | 4  |
| 17 | 1729.82        | 865.42          | <b>1712.79</b> | 856.90           | <b>1711.81</b> | 856.41           | C    | 474.56         | 237.78          | 457.52         | 229.27           |                |                  | 3  |
| 18 | <b>1800.90</b> | 900.95          | 1783.87        | 892.44           | 1782.89        | 891.95           | A    | 246.29         | 123.65          | 229.26         | 115.13           |                |                  | 2  |
| 19 |                |                 |                |                  |                |                  | R    | 175.21         | 88.11           | 158.18         | 79.59            |                |                  | 1  |

Gene Symbol  
PLSCR3

Sequences  
SGAGQPLGQAAEESN**C**AR

m/z  
988.17

Charge  
2+

Ion score  
96.1

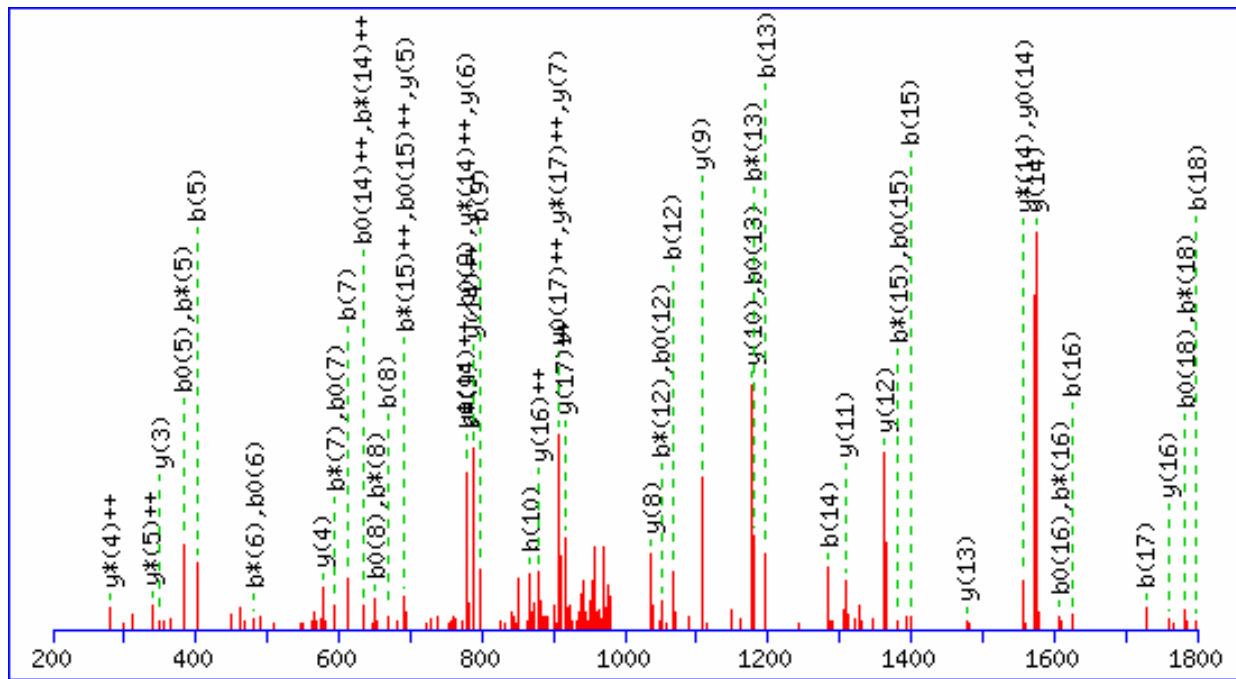

C16 : NEM (C)

| #  | b              | b <sup>++</sup> | b <sup>*</sup> | b <sup>*++</sup> | b <sup>0</sup> | b <sup>0++</sup> | Seq. | y              | y <sup>++</sup> | y <sup>*</sup> | y <sup>*++</sup> | y <sup>0</sup> | y <sup>0++</sup> | #  |
|----|----------------|-----------------|----------------|------------------|----------------|------------------|------|----------------|-----------------|----------------|------------------|----------------|------------------|----|
| 1  | 88.09          | 44.55           |                |                  | 70.07          | 35.54            | S    |                |                 |                |                  |                |                  | 19 |
| 2  | 145.14         | 73.07           |                |                  | 127.12         | 64.06            | G    | 1888.02        | 944.52          | 1870.99        | 936.00           | 1870.01        | 935.51           | 18 |
| 3  | 216.21         | 108.61          |                |                  | 198.20         | 99.60            | A    | 1830.97        | <b>915.99</b>   | 1813.94        | <b>907.48</b>    | 1812.96        | <b>906.98</b>    | 17 |
| 4  | 273.27         | 137.14          |                |                  | 255.25         | 128.13           | G    | <b>1759.90</b> | <b>880.45</b>   | 1742.86        | 871.94           | 1741.88        | 871.44           | 16 |
| 5  | <b>401.39</b>  | 201.20          | <b>384.36</b>  | 192.69           | <b>383.38</b>  | 192.19           | Q    | 1702.84        | 851.93          | 1685.81        | 843.41           | 1684.83        | 842.92           | 15 |
| 6  | 498.51         | 249.76          | <b>481.48</b>  | 241.24           | <b>480.49</b>  | 240.75           | P    | <b>1574.71</b> | <b>787.86</b>   | <b>1557.68</b> | <b>779.35</b>    | <b>1556.70</b> | <b>778.85</b>    | 14 |
| 7  | <b>611.67</b>  | 306.34          | <b>594.64</b>  | 297.82           | <b>593.65</b>  | 297.33           | L    | <b>1477.60</b> | 739.30          | 1460.57        | 730.79           | 1459.58        | 730.30           | 13 |
| 8  | <b>668.72</b>  | 334.86          | <b>651.69</b>  | 326.35           | <b>650.70</b>  | 325.86           | G    | <b>1364.44</b> | 682.73          | 1347.41        | 674.21           | 1346.43        | 673.72           | 12 |
| 9  | <b>796.85</b>  | 398.93          | <b>779.82</b>  | 390.41           | <b>778.83</b>  | 389.92           | Q    | <b>1307.39</b> | 654.20          | 1290.36        | 645.68           | 1289.38        | 645.19           | 11 |
| 10 | <b>867.93</b>  | 434.47          | 850.90         | 425.95           | 849.91         | 425.46           | A    | <b>1179.26</b> | 590.13          | 1162.23        | 581.62           | 1161.25        | 581.13           | 10 |
| 11 | 939.00         | 470.01          | 921.97         | 461.49           | 920.99         | 461.00           | A    | <b>1108.18</b> | 554.60          | 1091.15        | 546.08           | 1090.17        | 545.59           | 9  |
| 12 | <b>1068.12</b> | 534.56          | <b>1051.09</b> | 526.05           | <b>1050.10</b> | 525.56           | E    | <b>1037.11</b> | 519.06          | 1020.08        | 510.54           | 1019.09        | 510.05           | 8  |
| 13 | <b>1197.23</b> | 599.12          | <b>1180.20</b> | 590.60           | <b>1179.22</b> | 590.11           | E    | <b>907.99</b>  | 454.50          | 890.96         | 445.98           | 889.98         | 445.49           | 7  |
| 14 | <b>1284.31</b> | 642.66          | 1267.28        | <b>634.14</b>    | 1266.29        | <b>633.65</b>    | S    | <b>778.88</b>  | 389.94          | 761.85         | 381.43           | 760.86         | 380.94           | 6  |
| 15 | <b>1398.41</b> | 699.71          | <b>1381.38</b> | <b>691.19</b>    | <b>1380.40</b> | <b>690.70</b>    | N    | <b>691.80</b>  | 346.40          | 674.77         | <b>337.89</b>    |                |                  | 5  |
| 16 | <b>1626.68</b> | 813.84          | <b>1609.65</b> | 805.33           | <b>1608.66</b> | 804.84           | C    | <b>577.70</b>  | 289.35          | 560.67         | <b>280.84</b>    |                |                  | 4  |
| 17 | <b>1729.82</b> | 865.42          | 1712.79        | 856.90           | 1711.81        | 856.41           | C    | <b>349.43</b>  | 175.22          | 332.40         | 166.70           |                |                  | 3  |
| 18 | <b>1800.90</b> | 900.95          | <b>1783.87</b> | 892.44           | <b>1782.89</b> | 891.95           | A    | 246.29         | 123.65          | 229.26         | 115.13           |                |                  | 2  |
| 19 |                |                 |                |                  |                |                  | R    | 175.21         | 88.11           | 158.18         | 79.59            |                |                  | 1  |



Gene Symbol  
PLSCR3

Sequences  
SGAGQPLGQAAEESN**CC**AR

m/z  
925.59

Charge  
2+

Ion score  
105.2

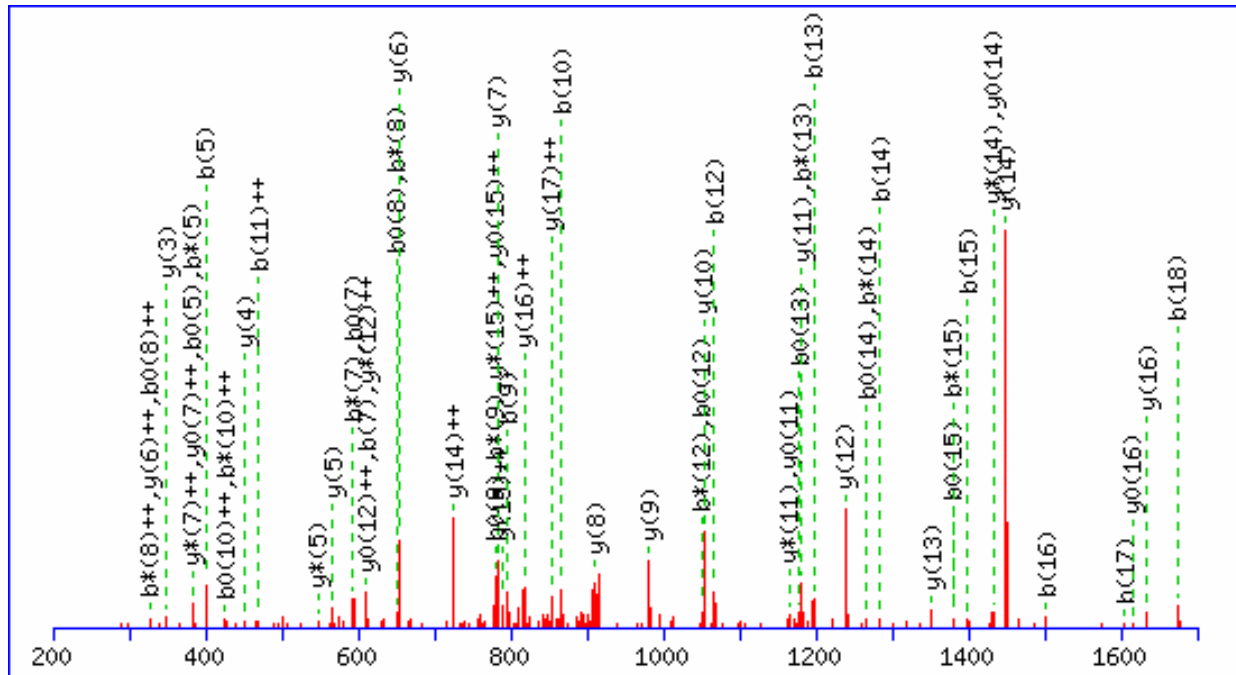

| #  | b              | b <sup>++</sup> | b <sup>*</sup> | b <sup>*++</sup> | b <sup>0</sup> | b <sup>0++</sup> | Seq. | y              | y <sup>++</sup> | y <sup>*</sup> | y <sup>*++</sup> | y <sup>0</sup> | y <sup>0++</sup> | #  |
|----|----------------|-----------------|----------------|------------------|----------------|------------------|------|----------------|-----------------|----------------|------------------|----------------|------------------|----|
| 1  | 88.09          | 44.55           |                |                  | 70.07          | 35.54            | S    |                |                 |                |                  |                |                  | 19 |
| 2  | 145.14         | 73.07           |                |                  | 127.12         | 64.06            | G    | 1762.90        | 881.95          | 1745.87        | 873.44           | 1744.88        | 872.95           | 18 |
| 3  | 216.21         | 108.61          |                |                  | 198.20         | 99.60            | A    | 1705.85        | <b>853.43</b>   | 1688.82        | 844.91           | 1687.83        | 844.42           | 17 |
| 4  | 273.27         | 137.14          |                |                  | 255.25         | 128.13           | G    | <b>1634.77</b> | <b>817.89</b>   | 1617.74        | 809.37           | <b>1616.75</b> | 808.88           | 16 |
| 5  | <b>401.39</b>  | 201.20          | <b>384.36</b>  | 192.69           | <b>383.38</b>  | 192.19           | Q    | 1577.72        | <b>789.36</b>   | 1560.69        | <b>780.85</b>    | 1559.70        | <b>780.36</b>    | 15 |
| 6  | 498.51         | 249.76          | 481.48         | 241.24           | 480.49         | 240.75           | P    | <b>1449.59</b> | <b>725.30</b>   | <b>1432.56</b> | 716.78           | <b>1431.57</b> | 716.29           | 14 |
| 7  | <b>611.67</b>  | 306.34          | <b>594.64</b>  | 297.82           | <b>593.65</b>  | 297.33           | L    | <b>1352.47</b> | 676.74          | 1335.44        | 668.23           | 1334.46        | 667.73           | 13 |
| 8  | 668.72         | 334.86          | <b>651.69</b>  | <b>326.35</b>    | <b>650.70</b>  | <b>325.86</b>    | G    | <b>1239.32</b> | 620.16          | 1222.29        | <b>611.65</b>    | 1221.30        | <b>611.15</b>    | 12 |
| 9  | <b>796.85</b>  | 398.93          | <b>779.82</b>  | 390.41           | <b>778.83</b>  | 389.92           | Q    | <b>1182.27</b> | 591.64          | <b>1165.23</b> | 583.12           | <b>1164.25</b> | 582.63           | 11 |
| 10 | <b>867.93</b>  | 434.47          | 850.90         | <b>425.95</b>    | 849.91         | <b>425.46</b>    | A    | <b>1054.14</b> | 527.57          | 1037.11        | 519.06           | 1036.12        | 518.56           | 10 |
| 11 | 939.00         | <b>470.01</b>   | 921.97         | 461.49           | 920.99         | 461.00           | A    | <b>983.06</b>  | 492.03          | 966.03         | 483.52           | 965.04         | 483.03           | 9  |
| 12 | <b>1068.12</b> | 534.56          | <b>1051.09</b> | 526.05           | <b>1050.10</b> | 525.56           | E    | <b>911.98</b>  | 456.49          | 894.95         | 447.98           | 893.97         | 447.49           | 8  |
| 13 | <b>1197.23</b> | 599.12          | <b>1180.20</b> | 590.60           | <b>1179.22</b> | 590.11           | E    | <b>782.87</b>  | 391.94          | 765.84         | <b>383.42</b>    | 764.85         | <b>382.93</b>    | 7  |
| 14 | <b>1284.31</b> | 642.66          | <b>1267.28</b> | 634.14           | <b>1266.29</b> | 633.65           | S    | <b>653.75</b>  | <b>327.38</b>   | 636.72         | 318.86           | 635.74         | 318.37           | 6  |
| 15 | <b>1398.41</b> | 699.71          | <b>1381.38</b> | 691.19           | <b>1380.40</b> | 690.70           | N    | <b>566.68</b>  | 283.84          | <b>549.64</b>  | 275.33           |                |                  | 5  |
| 16 | <b>1501.55</b> | 751.28          | 1484.52        | 742.77           | 1483.54        | 742.27           | C    | <b>452.57</b>  | 226.79          | 435.54         | 218.28           |                |                  | 4  |
| 17 | <b>1604.70</b> | 802.85          | 1587.67        | 794.34           | 1586.68        | 793.85           | C    | <b>349.43</b>  | 175.22          | 332.40         | 166.70           |                |                  | 3  |
| 18 | <b>1675.78</b> | 838.39          | 1658.75        | 829.88           | 1657.76        | 829.38           | A    | 246.29         | 123.65          | 229.26         | 115.13           |                |                  | 2  |
| 19 |                |                 |                |                  |                |                  | R    | 175.21         | 88.11           | 158.18         | 79.59            |                |                  | 1  |

Gene Symbol  
PLSCR3

Sequences  
VVGPCWTCGCGTDTNFEVK

m/z  
1009.18

Charge  
2+

Ion score  
60.0

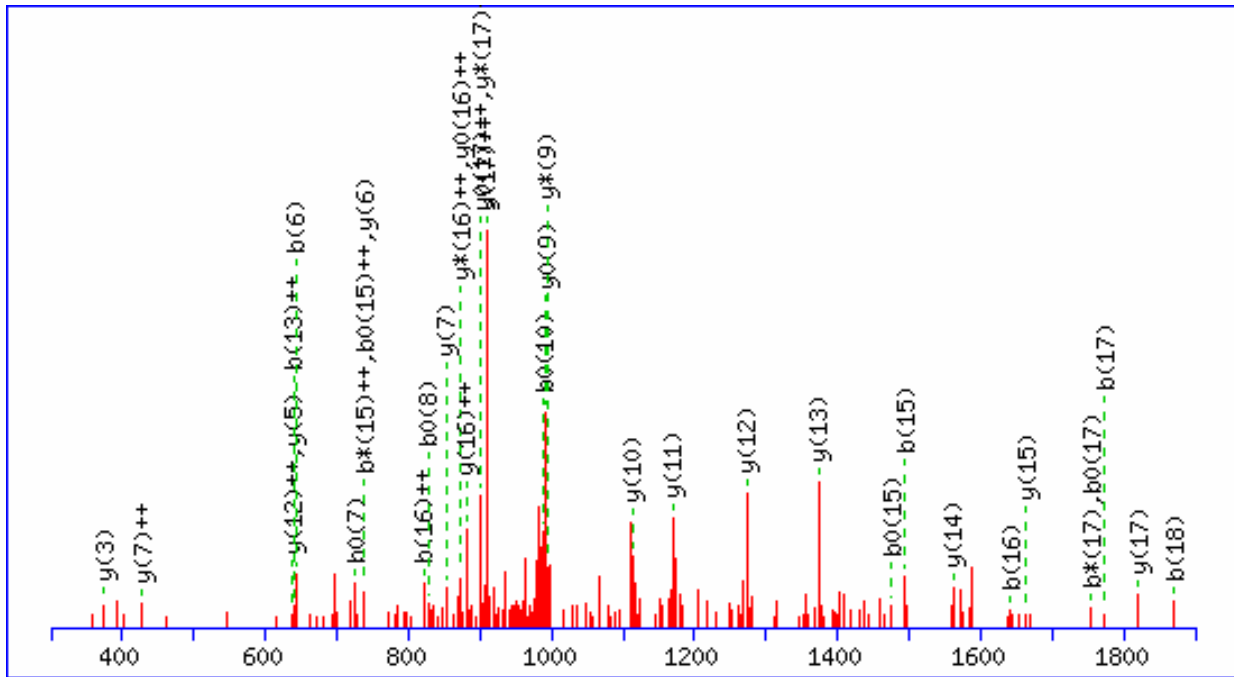

| #  | b       | b <sup>++</sup> | b <sup>*</sup> | b <sup>*++</sup> | b <sup>0</sup> | b <sup>0++</sup> | Seq. | y       | y <sup>++</sup> | y <sup>*</sup> | y <sup>*++</sup> | y <sup>0</sup> | y <sup>0++</sup> | #  |
|----|---------|-----------------|----------------|------------------|----------------|------------------|------|---------|-----------------|----------------|------------------|----------------|------------------|----|
| 1  | 100.14  | 50.57           |                |                  |                |                  | V    |         |                 |                |                  |                |                  | 19 |
| 2  | 199.27  | 100.14          |                |                  |                |                  | V    | 1918.16 | 959.58          | 1901.12        | 951.07           | 1900.14        | 950.57           | 18 |
| 3  | 256.32  | 128.66          |                |                  |                |                  | G    | 1819.02 | 910.02          | 1801.99        | 901.50           | 1801.01        | 901.01           | 17 |
| 4  | 353.44  | 177.22          |                |                  |                |                  | P    | 1761.97 | 881.49          | 1744.94        | 872.98           | 1743.96        | 872.48           | 16 |
| 5  | 456.58  | 228.79          |                |                  |                |                  | C    | 1664.86 | 832.93          | 1647.83        | 824.42           | 1646.84        | 823.93           | 15 |
| 6  | 642.79  | 321.90          |                |                  |                |                  | W    | 1561.71 | 781.36          | 1544.68        | 772.85           | 1543.70        | 772.35           | 14 |
| 7  | 743.89  | 372.45          |                |                  | 725.88         | 363.44           | T    | 1375.50 | 688.26          | 1358.47        | 679.74           | 1357.49        | 679.25           | 13 |
| 8  | 847.04  | 424.02          |                |                  | 829.02         | 415.01           | C    | 1274.40 | 637.70          | 1257.37        | 629.19           | 1256.39        | 628.70           | 12 |
| 9  | 904.09  | 452.55          |                |                  | 886.07         | 443.54           | G    | 1171.26 | 586.13          | 1154.23        | 577.62           | 1153.24        | 577.13           | 11 |
| 10 | 1007.23 | 504.12          |                |                  | 989.22         | 495.11           | C    | 1114.21 | 557.61          | 1097.18        | 549.09           | 1096.19        | 548.60           | 10 |
| 11 | 1064.28 | 532.64          |                |                  | 1046.27        | 523.64           | G    | 1011.06 | 506.04          | 994.03         | 497.52           | 993.05         | 497.03           | 9  |
| 12 | 1165.39 | 583.20          |                |                  | 1147.37        | 574.19           | T    | 954.01  | 477.51          | 936.98         | 468.99           | 936.00         | 468.50           | 8  |
| 13 | 1280.47 | 640.74          |                |                  | 1262.46        | 631.73           | D    | 852.91  | 426.96          | 835.88         | 418.44           | 834.89         | 417.95           | 7  |
| 14 | 1381.58 | 691.29          |                |                  | 1363.56        | 682.28           | T    | 737.82  | 369.41          | 720.79         | 360.90           | 719.81         | 360.41           | 6  |
| 15 | 1495.68 | 748.34          | 1478.65        | 739.83           | 1477.66        | 739.34           | N    | 636.72  | 318.86          | 619.69         | 310.35           | 618.70         | 309.85           | 5  |
| 16 | 1642.85 | 821.93          | 1625.82        | 813.42           | 1624.84        | 812.92           | F    | 522.61  | 261.81          | 505.58         | 253.30           | 504.60         | 252.80           | 4  |
| 17 | 1771.97 | 886.49          | 1754.94        | 877.97           | 1753.95        | 877.48           | E    | 375.44  | 188.22          | 358.41         | 179.71           | 357.43         | 179.22           | 3  |
| 18 | 1871.10 | 936.05          | 1854.07        | 927.54           | 1853.08        | 927.05           | V    | 246.33  | 123.67          | 229.30         | 115.15           |                |                  | 2  |
| 19 |         |                 |                |                  |                |                  | K    | 147.20  | 74.10           | 130.16         | 65.59            |                |                  | 1  |

Gene Symbol  
PLSCR4

Sequences  
VRGPG**C**STYGG**C**GSDSVFEVK

m/z  
996.39

Charge  
2+

Ion score  
61.1

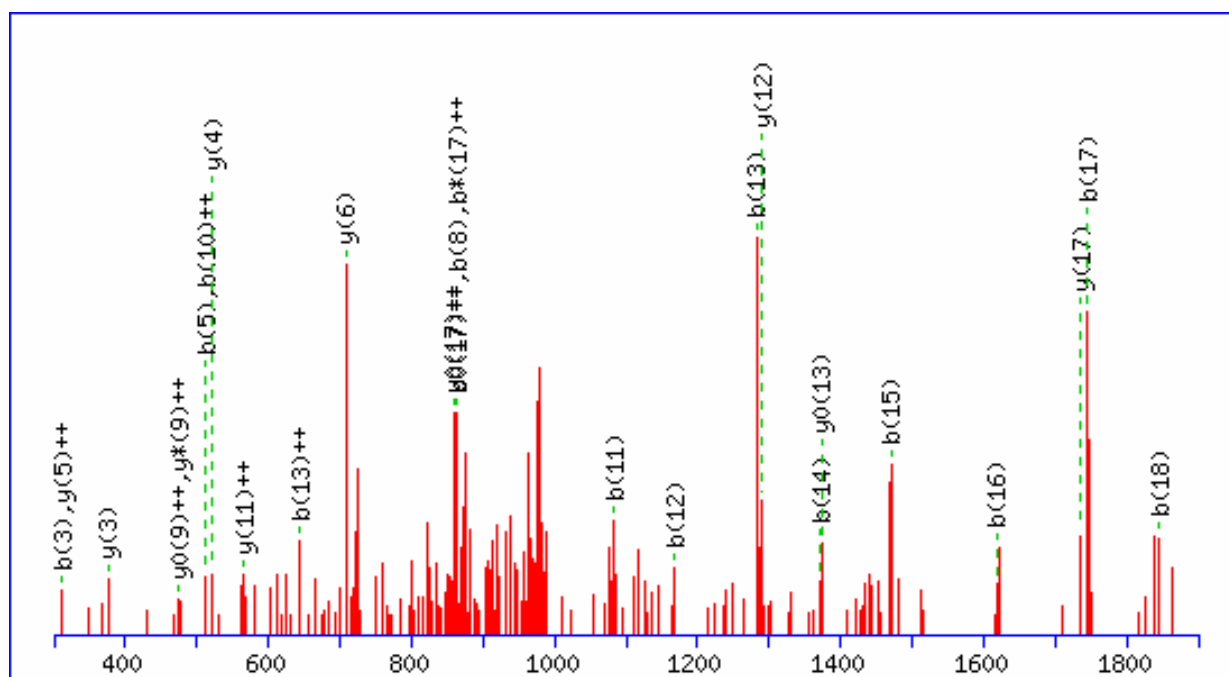

| #  | b              | b <sup>++</sup> | b <sup>*</sup> | b <sup>*++</sup> | b <sup>0</sup> | b <sup>0++</sup> | Seq. | y              | y <sup>++</sup> | y <sup>*</sup> | y <sup>*++</sup> | y <sup>0</sup> | y <sup>0++</sup> | #  |
|----|----------------|-----------------|----------------|------------------|----------------|------------------|------|----------------|-----------------|----------------|------------------|----------------|------------------|----|
| 1  | 100.14         | 50.57           |                |                  |                |                  | V    |                |                 |                |                  |                |                  | 19 |
| 2  | 256.32         | 128.67          | 239.29         | 120.15           |                |                  | R    | 1893.08        | 947.05          | 1876.05        | 938.53           | 1875.07        | 938.04           | 18 |
| 3  | <b>313.38</b>  | 157.19          | 296.35         | 148.68           |                |                  | G    | <b>1736.90</b> | 868.95          | 1719.87        | 860.44           | 1718.88        | <b>859.94</b>    | 17 |
| 4  | 410.49         | 205.75          | 393.46         | 197.23           |                |                  | P    | 1679.85        | 840.43          | 1662.82        | 831.91           | 1661.83        | 831.42           | 16 |
| 5  | <b>513.63</b>  | 257.32          | 496.60         | 248.81           |                |                  | C    | 1582.73        | 791.87          | 1565.70        | 783.35           | 1564.72        | 782.86           | 15 |
| 6  | 600.71         | 300.86          | 583.68         | 292.34           | 582.70         | 291.85           | S    | 1479.59        | 740.30          | 1462.56        | 731.78           | 1461.57        | 731.29           | 14 |
| 7  | 701.82         | 351.41          | 684.78         | 342.90           | 683.80         | 342.40           | T    | 1392.51        | 696.76          | 1375.48        | 688.24           | <b>1374.50</b> | 687.75           | 13 |
| 8  | <b>864.99</b>  | 433.00          | 847.96         | 424.48           | 846.97         | 423.99           | Y    | <b>1291.41</b> | 646.21          | 1274.38        | 637.69           | 1273.39        | 637.20           | 12 |
| 9  | 922.04         | 461.52          | 905.01         | 453.01           | 904.02         | 452.52           | G    | 1128.23        | <b>564.62</b>   | 1111.20        | 556.11           | 1110.22        | 555.61           | 11 |
| 10 | 1025.18        | <b>513.10</b>   | 1008.15        | 504.58           | 1007.17        | 504.09           | C    | 1071.18        | 536.09          | 1054.15        | 527.58           | 1053.17        | 527.09           | 10 |
| 11 | <b>1082.23</b> | 541.62          | 1065.20        | 533.11           | 1064.22        | 532.61           | G    | 968.04         | 484.52          | 951.01         | <b>476.01</b>    | 950.02         | <b>475.52</b>    | 9  |
| 12 | <b>1169.31</b> | 585.16          | 1152.28        | 576.64           | 1151.30        | 576.15           | S    | 910.99         | 456.00          | 893.96         | 447.48           | 892.97         | 446.99           | 8  |
| 13 | <b>1284.40</b> | <b>642.70</b>   | 1267.37        | 634.19           | 1266.38        | 633.70           | D    | 823.91         | 412.46          | 806.88         | 403.94           | 805.90         | 403.45           | 7  |
| 14 | <b>1371.48</b> | 686.24          | 1354.45        | 677.73           | 1353.46        | 677.23           | S    | <b>708.82</b>  | 354.92          | 691.79         | 346.40           | 690.81         | 345.91           | 6  |
| 15 | <b>1470.61</b> | 735.81          | 1453.58        | 727.29           | 1452.59        | 726.80           | V    | 621.75         | <b>311.38</b>   | 604.72         | 302.86           | 603.73         | 302.37           | 5  |
| 16 | <b>1617.78</b> | 809.39          | 1600.75        | 800.88           | 1599.77        | 800.39           | F    | <b>522.61</b>  | 261.81          | 505.58         | 253.30           | 504.60         | 252.80           | 4  |
| 17 | <b>1746.90</b> | 873.95          | 1729.86        | <b>865.44</b>    | 1728.88        | <b>864.94</b>    | E    | <b>375.44</b>  | 188.22          | 358.41         | 179.71           | 357.43         | 179.22           | 3  |
| 18 | <b>1846.03</b> | 923.52          | 1829.00        | 915.00           | 1828.01        | 914.51           | V    | 246.33         | 123.67          | 229.30         | 115.15           |                |                  | 2  |
| 19 |                |                 |                |                  |                |                  | K    | 147.20         | 74.10           | 130.16         | 65.59            |                |                  | 1  |

Gene Symbol  
PRDX4

Sequences  
TREEE**C**HFYAGGQVYPGEASR

m/z  
796.40

Charge  
3+

Ion score  
57.3

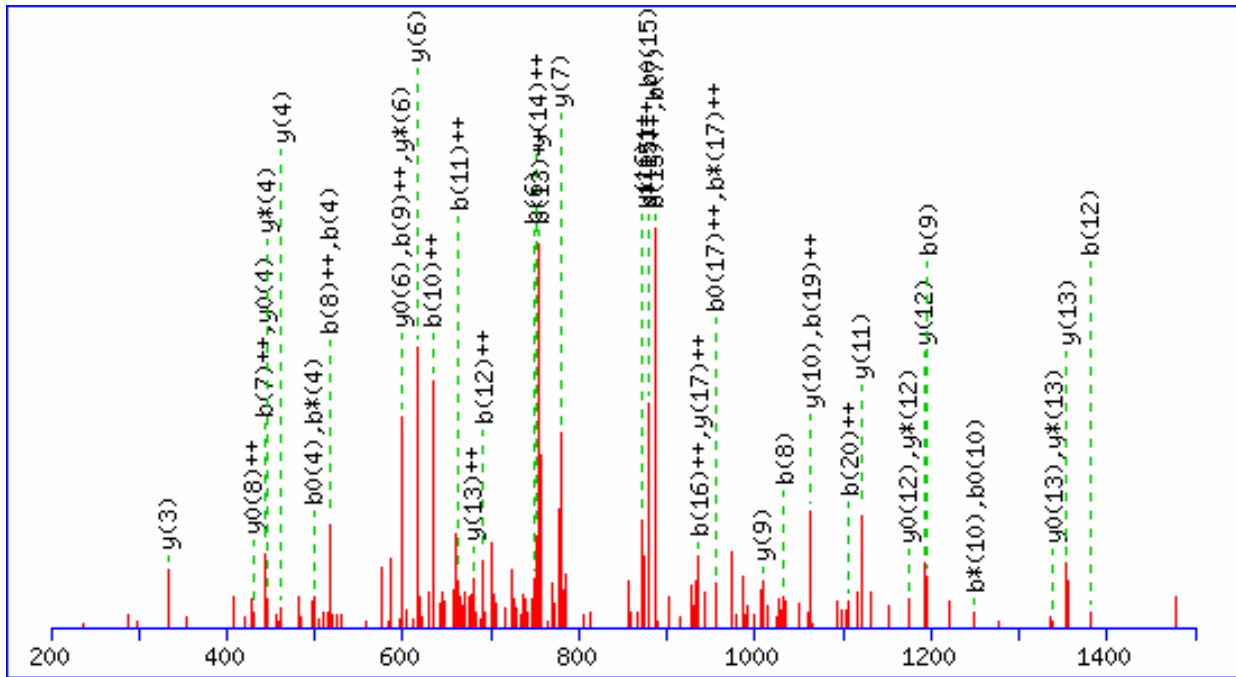

| #  | b              | b <sup>++</sup> | b <sup>*</sup> | b <sup>+++</sup> | b <sup>0</sup> | b <sup>0++</sup> | Seq. | y              | y <sup>++</sup> | y <sup>*</sup> | y <sup>+++</sup> | y <sup>0</sup> | y <sup>0++</sup> | #  |
|----|----------------|-----------------|----------------|------------------|----------------|------------------|------|----------------|-----------------|----------------|------------------|----------------|------------------|----|
| 1  | 102.11         | 51.56           |                |                  | 84.10          | 42.55            | T    |                |                 |                |                  |                |                  | 21 |
| 2  | 258.30         | 129.65          | 241.27         | 121.14           | 240.28         | 120.65           | R    | 2286.42        | 1143.71         | 2269.39        | 1135.20          | 2268.40        | 1134.70          | 20 |
| 3  | 387.41         | 194.21          | 370.38         | 185.69           | 369.40         | 185.20           | E    | 2130.23        | 1065.62         | 2113.20        | 1057.10          | 2112.21        | 1056.61          | 19 |
| 4  | <b>516.53</b>  | 258.77          | <b>499.50</b>  | 250.25           | <b>498.51</b>  | 249.76           | E    | 2001.12        | 1001.06         | 1984.09        | 992.55           | 1983.10        | 992.05           | 18 |
| 5  | 645.64         | 323.32          | 628.61         | 314.81           | 627.62         | 314.32           | E    | 1872.00        | <b>936.51</b>   | 1854.97        | 927.99           | 1853.99        | 927.50           | 17 |
| 6  | <b>748.78</b>  | 374.90          | 731.75         | 366.38           | 730.77         | 365.89           | C    | 1742.89        | <b>871.95</b>   | 1725.86        | 863.43           | 1724.87        | 862.94           | 16 |
| 7  | <b>885.92</b>  | <b>443.46</b>   | 868.89         | 434.95           | 867.91         | 434.46           | H    | 1639.75        | 820.38          | 1622.71        | 811.86           | 1621.73        | 811.37           | 15 |
| 8  | <b>1033.10</b> | <b>517.05</b>   | 1016.07        | 508.54           | 1015.08        | 508.04           | F    | 1502.61        | <b>751.81</b>   | 1485.58        | 743.29           | 1484.59        | 742.80           | 14 |
| 9  | <b>1196.27</b> | <b>598.64</b>   | 1179.24        | 590.12           | 1178.25        | 589.63           | Y    | <b>1355.43</b> | <b>678.22</b>   | <b>1338.40</b> | 669.70           | <b>1337.42</b> | 669.21           | 13 |
| 10 | 1267.35        | <b>634.18</b>   | <b>1250.32</b> | 625.66           | <b>1249.33</b> | 625.17           | A    | <b>1192.26</b> | 596.63          | <b>1175.23</b> | 588.12           | <b>1174.24</b> | 587.63           | 12 |
| 11 | 1324.40        | <b>662.70</b>   | 1307.37        | 654.19           | 1306.38        | 653.70           | G    | <b>1121.18</b> | 561.09          | 1104.15        | 552.58           | 1103.17        | 552.09           | 11 |
| 12 | <b>1381.45</b> | <b>691.23</b>   | 1364.42        | 682.71           | 1363.43        | 682.22           | G    | <b>1064.13</b> | 532.57          | 1047.10        | 524.05           | 1046.11        | 523.56           | 10 |
| 13 | 1509.58        | <b>755.29</b>   | 1492.55        | 746.78           | 1491.56        | 746.29           | Q    | <b>1007.08</b> | 504.04          | 990.05         | 495.53           | 989.06         | 495.04           | 9  |
| 14 | 1608.71        | 804.86          | 1591.68        | 796.34           | 1590.69        | 795.85           | V    | <b>878.95</b>  | 439.98          | 861.92         | 431.46           | 860.93         | <b>430.97</b>    | 8  |
| 15 | 1771.88        | <b>886.45</b>   | 1754.85        | <b>877.93</b>    | 1753.87        | <b>877.44</b>    | Y    | <b>779.82</b>  | 390.41          | 762.79         | 381.90           | 761.80         | 381.41           | 7  |
| 16 | 1869.00        | <b>935.00</b>   | 1851.97        | 926.49           | 1850.98        | 926.00           | P    | <b>616.64</b>  | 308.83          | <b>599.61</b>  | 300.31           | <b>598.63</b>  | 299.82           | 6  |
| 17 | 1926.05        | 963.53          | 1909.02        | <b>955.01</b>    | 1908.03        | <b>954.52</b>    | G    | 519.53         | 260.27          | 502.50         | 251.75           | 501.51         | 251.26           | 5  |
| 18 | 2055.16        | 1028.09         | 2038.13        | 1019.57          | 2037.15        | 1019.08          | E    | <b>462.48</b>  | 231.74          | <b>445.45</b>  | 223.23           | <b>444.46</b>  | 222.74           | 4  |
| 19 | 2126.24        | <b>1063.62</b>  | 2109.21        | 1055.11          | 2108.23        | 1054.62          | A    | <b>333.36</b>  | 167.19          | 316.33         | 158.67           | 315.35         | 158.18           | 3  |
| 20 | 2213.32        | <b>1107.16</b>  | 2196.29        | 1098.65          | 2195.30        | 1098.16          | S    | 262.29         | 131.65          | 245.26         | 123.13           | 244.27         | 122.64           | 2  |
| 21 |                |                 |                |                  |                |                  | R    | 175.21         | 88.11           | 158.18         | 79.59            |                |                  | 1  |

Gene Symbol  
PRPF19

Sequences  
SLIC**S**ISNEVPEHP**C**VSPVSNHVVYR

m/z  
1021.73

Charge  
3+

Ion score  
76.1

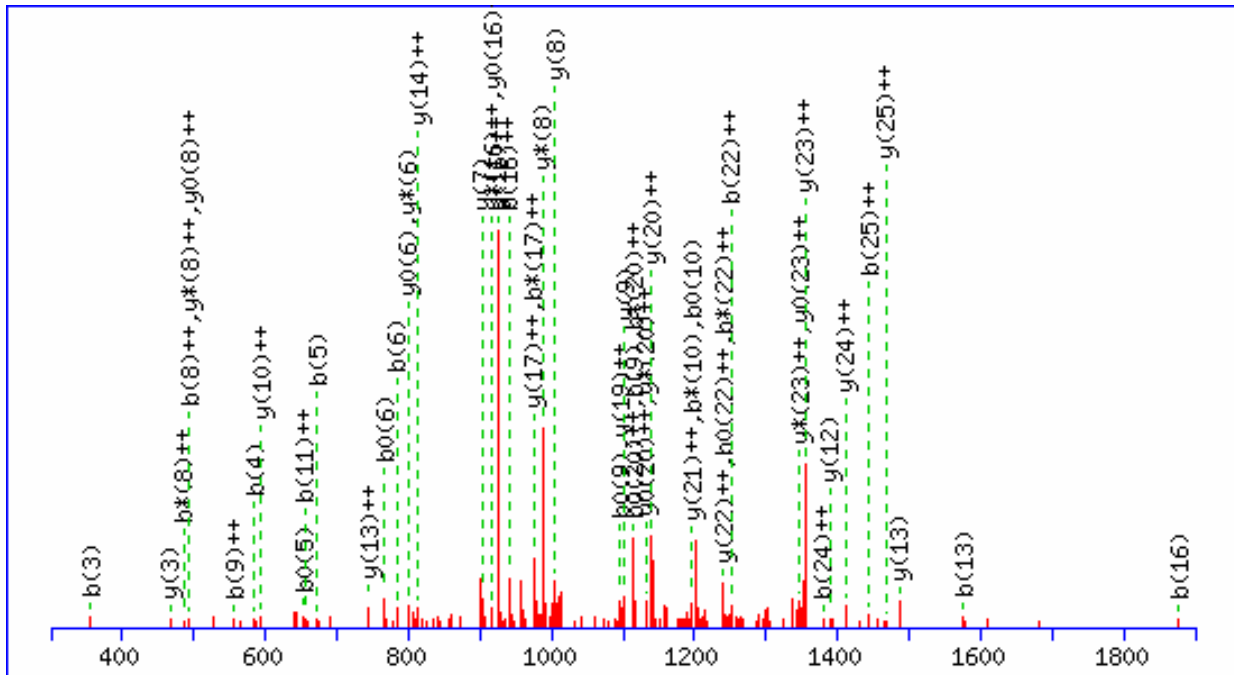

N-term : N-Acetyl (Protein)  
C4 : NEM (C)

| #  | b       | b <sup>++</sup> | b <sup>*</sup> | b <sup>+++</sup> | b <sup>0</sup> | b <sup>0++</sup> | Seq. | y       | y <sup>++</sup> | y <sup>*</sup> | y <sup>+++</sup> | y <sup>0</sup> | y <sup>0++</sup> | #  |
|----|---------|-----------------|----------------|------------------|----------------|------------------|------|---------|-----------------|----------------|------------------|----------------|------------------|----|
| 1  | 130.12  | 65.56           |                |                  | 112.11         | 56.56            | S    |         |                 |                |                  |                |                  | 26 |
| 2  | 243.28  | 122.14          |                |                  | 225.26         | 113.14           | L    | 2935.27 | 1468.14         | 2918.24        | 1459.62          | 2917.26        | 1459.13          | 25 |
| 3  | 356.44  | 178.72          |                |                  | 338.42         | 169.71           | I    | 2822.11 | 1411.56         | 2805.08        | 1403.05          | 2804.10        | 1402.55          | 24 |
| 4  | 584.71  | 292.86          |                |                  | 566.69         | 283.85           | C    | 2708.96 | 1354.98         | 2691.93        | 1346.47          | 2690.94        | 1345.97          | 23 |
| 5  | 671.78  | 336.40          |                |                  | 653.77         | 327.39           | S    | 2480.69 | 1240.85         | 2463.66        | 1232.33          | 2462.67        | 1231.84          | 22 |
| 6  | 784.94  | 392.97          |                |                  | 766.92         | 383.97           | I    | 2393.61 | 1197.31         | 2376.58        | 1188.79          | 2375.60        | 1188.30          | 21 |
| 7  | 872.02  | 436.51          |                |                  | 854.00         | 427.51           | S    | 2280.45 | 1140.73         | 2263.42        | 1132.22          | 2262.44        | 1131.72          | 20 |
| 8  | 986.12  | 493.56          | 969.09         | 485.05           | 968.10         | 484.56           | N    | 2193.38 | 1097.19         | 2176.35        | 1088.68          | 2175.36        | 1088.18          | 19 |
| 9  | 1115.23 | 558.12          | 1098.20        | 549.61           | 1097.22        | 549.11           | E    | 2079.27 | 1040.14         | 2062.24        | 1031.63          | 2061.26        | 1031.13          | 18 |
| 10 | 1214.37 | 607.69          | 1197.33        | 599.17           | 1196.35        | 598.68           | V    | 1950.16 | 975.58          | 1933.13        | 967.07           | 1932.14        | 966.58           | 17 |
| 11 | 1311.48 | 656.24          | 1294.45        | 647.73           | 1293.47        | 647.24           | P    | 1851.03 | 926.02          | 1834.00        | 917.50           | 1833.01        | 917.01           | 16 |
| 12 | 1440.59 | 720.80          | 1423.56        | 712.29           | 1422.58        | 711.79           | E    | 1753.91 | 877.46          | 1736.88        | 868.95           | 1735.90        | 868.45           | 15 |
| 13 | 1577.73 | 789.37          | 1560.70        | 780.86           | 1559.72        | 780.36           | H    | 1624.80 | 812.90          | 1607.77        | 804.39           | 1606.78        | 803.90           | 14 |
| 14 | 1674.85 | 837.93          | 1657.82        | 829.41           | 1656.83        | 828.92           | P    | 1487.66 | 744.33          | 1470.63        | 735.82           | 1469.64        | 735.33           | 13 |
| 15 | 1777.99 | 889.50          | 1760.96        | 880.98           | 1759.98        | 880.49           | C    | 1390.54 | 695.78          | 1373.51        | 687.26           | 1372.53        | 686.77           | 12 |
| 16 | 1877.12 | 939.07          | 1860.09        | 930.55           | 1859.11        | 930.06           | V    | 1287.40 | 644.20          | 1270.37        | 635.69           | 1269.39        | 635.20           | 11 |
| 17 | 1964.20 | 982.60          | 1947.17        | 974.09           | 1946.18        | 973.60           | S    | 1188.27 | 594.64          | 1171.24        | 586.12           | 1170.25        | 585.63           | 10 |
| 18 | 2061.32 | 1031.16         | 2044.28        | 1022.65          | 2043.30        | 1022.15          | P    | 1101.19 | 551.10          | 1084.16        | 542.59           | 1083.18        | 542.09           | 9  |
| 19 | 2160.45 | 1080.73         | 2143.42        | 1072.21          | 2142.43        | 1071.72          | V    | 1004.08 | 502.54          | 987.05         | 494.03           | 986.06         | 493.54           | 8  |
| 20 | 2247.52 | 1124.27         | 2230.49        | 1115.75          | 2229.51        | 1115.26          | S    | 904.95  | 452.98          | 887.92         | 444.46           | 886.93         | 443.97           | 7  |
| 21 | 2361.63 | 1181.32         | 2344.60        | 1172.80          | 2343.61        | 1172.31          | N    | 817.87  | 409.44          | 800.84         | 400.92           | 799.85         | 400.43           | 6  |
| 22 | 2498.77 | 1249.89         | 2481.74        | 1241.37          | 2480.75        | 1240.88          | H    | 703.77  | 352.39          | 686.74         | 343.87           | 685.75         | 343.38           | 5  |
| 23 | 2597.90 | 1299.45         | 2580.87        | 1290.94          | 2579.88        | 1290.44          | V    | 566.63  | 283.82          | 549.60         | 275.30           | 548.61         | 274.81           | 4  |
| 24 | 2761.07 | 1381.04         | 2744.04        | 1372.52          | 2743.05        | 1372.03          | Y    | 467.50  | 234.25          | 450.47         | 225.74           | 449.48         | 225.24           | 3  |
| 25 | 2890.18 | 1445.60         | 2873.15        | 1437.08          | 2872.17        | 1436.59          | E    | 304.32  | 152.67          | 287.29         | 144.15           | 286.31         | 143.66           | 2  |
| 26 |         |                 |                |                  |                |                  | R    | 175.21  | 88.11           | 158.18         | 79.59            |                |                  | 1  |

Gene Symbol  
RAP2C

Sequences  
ALAQEWG**C**PFMETS**A**K

m/z  
884.82

Charge  
2+

Ion score  
77.8

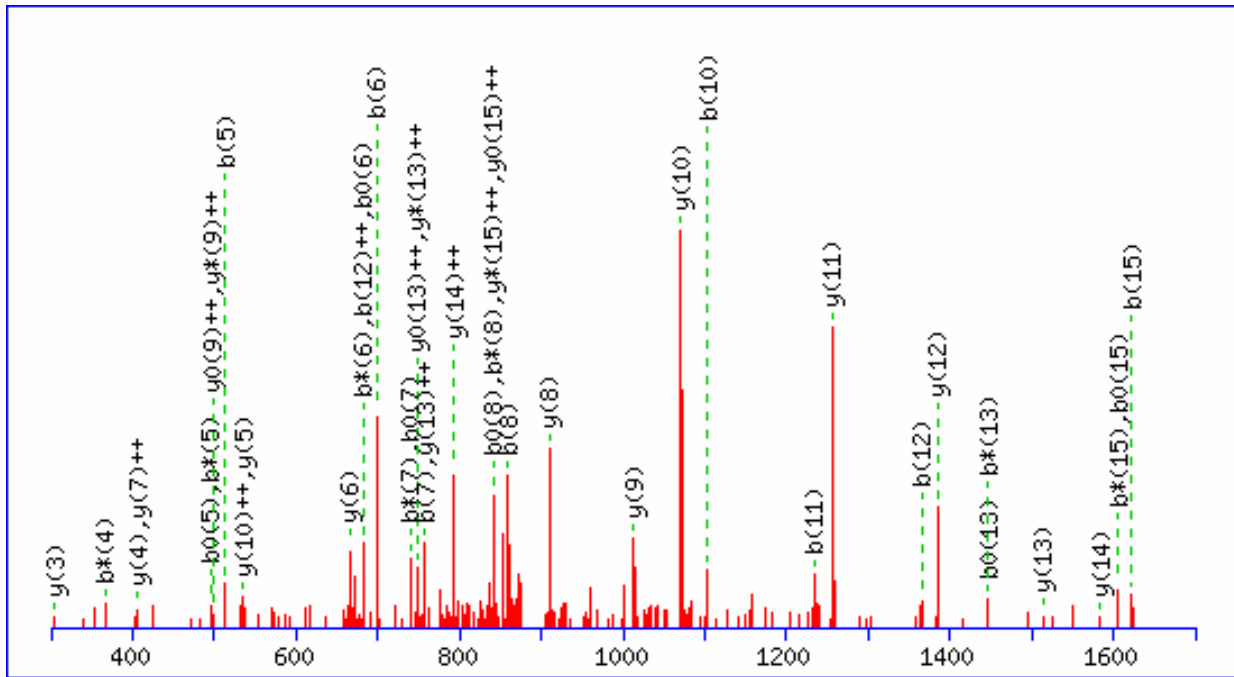

| #  | b              | b <sup>++</sup> | b <sup>*</sup> | b <sup>*++</sup> | b <sup>0</sup> | b <sup>0++</sup> | Seq. | y              | y <sup>++</sup> | y <sup>*</sup> | y <sup>*++</sup> | y <sup>0</sup> | y <sup>0++</sup> | #  |
|----|----------------|-----------------|----------------|------------------|----------------|------------------|------|----------------|-----------------|----------------|------------------|----------------|------------------|----|
| 1  | 72.09          | 36.55           |                |                  |                |                  | A    |                |                 |                |                  |                |                  | 16 |
| 2  | 185.24         | 93.13           |                |                  |                |                  | L    | 1698.94        | 849.97          | 1681.91        | <b>841.46</b>    | 1680.92        | <b>840.96</b>    | 15 |
| 3  | 256.32         | 128.66          |                |                  |                |                  | A    | <b>1585.78</b> | <b>793.39</b>   | 1568.75        | 784.88           | 1567.76        | 784.39           | 14 |
| 4  | 384.45         | 192.73          | <b>367.42</b>  | 184.21           |                |                  | Q    | <b>1514.70</b> | <b>757.85</b>   | 1497.67        | <b>749.34</b>    | 1496.69        | <b>748.85</b>    | 13 |
| 5  | <b>513.56</b>  | 257.29          | <b>496.53</b>  | 248.77           | <b>495.55</b>  | 248.28           | E    | <b>1386.57</b> | 693.79          | 1369.54        | 685.27           | 1368.56        | 684.78           | 12 |
| 6  | <b>699.77</b>  | 350.39          | <b>682.74</b>  | 341.88           | <b>681.76</b>  | 341.38           | W    | <b>1257.46</b> | 629.23          | 1240.43        | 620.72           | 1239.44        | 620.23           | 11 |
| 7  | <b>756.83</b>  | 378.92          | <b>739.80</b>  | 370.40           | <b>738.81</b>  | 369.91           | G    | <b>1071.25</b> | <b>536.13</b>   | 1054.22        | 527.61           | 1053.23        | 527.12           | 10 |
| 8  | <b>859.97</b>  | 430.49          | <b>842.94</b>  | 421.97           | <b>841.95</b>  | 421.48           | C    | <b>1014.20</b> | 507.60          | 997.17         | <b>499.09</b>    | 996.18         | <b>498.59</b>    | 9  |
| 9  | 957.08         | 479.05          | 940.05         | 470.53           | 939.07         | 470.04           | P    | <b>911.05</b>  | 456.03          | 894.02         | 447.52           | 893.04         | 447.02           | 8  |
| 10 | <b>1104.26</b> | 552.63          | 1087.23        | 544.12           | 1086.24        | 543.63           | F    | 813.94         | <b>407.47</b>   | 796.91         | 398.96           | 795.92         | 398.47           | 7  |
| 11 | <b>1235.45</b> | 618.23          | 1218.42        | 609.72           | 1217.44        | 609.22           | M    | <b>666.76</b>  | 333.89          | 649.73         | 325.37           | 648.75         | 324.88           | 6  |
| 12 | <b>1364.57</b> | <b>682.79</b>   | 1347.54        | 674.27           | 1346.55        | 673.78           | E    | <b>535.57</b>  | 268.29          | 518.54         | 259.77           | 517.55         | 259.28           | 5  |
| 13 | 1465.67        | 733.34          | <b>1448.64</b> | 724.82           | <b>1447.66</b> | 724.33           | T    | <b>406.45</b>  | 203.73          | 389.42         | 195.22           | 388.44         | 194.72           | 4  |
| 14 | 1552.75        | 776.88          | 1535.72        | 768.36           | 1534.73        | 767.87           | S    | <b>305.35</b>  | 153.18          | 288.32         | 144.66           | 287.34         | 144.17           | 3  |
| 15 | <b>1623.83</b> | 812.42          | <b>1606.80</b> | 803.90           | <b>1605.81</b> | 803.41           | A    | 218.27         | 109.64          | 201.24         | 101.13           |                |                  | 2  |
| 16 |                |                 |                |                  |                |                  | K    | 147.20         | 74.10           | 130.16         | 65.59            |                |                  | 1  |

Gene Symbol RNF31 Sequences LLAQECAVCGWALPHNRMQALTSCECTICPDCFR m/z 982.60 Charge 4+ Ion score 61.3

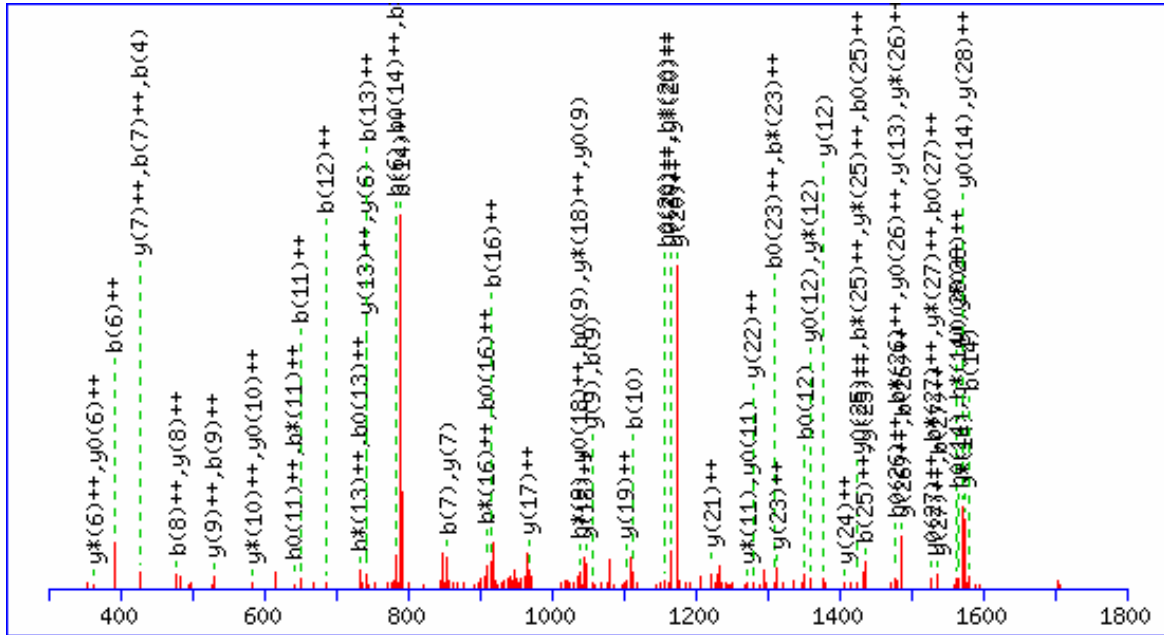

C6 : NEM (C)  
M18 : Oxidation (M)

| #  | b              | b <sup>+</sup> | b <sup>+</sup> | b <sup>++</sup> | b <sup>0</sup> | b <sup>0++</sup> | Seq. | y              | y <sup>+</sup> | y <sup>+</sup> | y <sup>++</sup> | y <sup>0</sup> | y <sup>0++</sup> | #  |
|----|----------------|----------------|----------------|-----------------|----------------|------------------|------|----------------|----------------|----------------|-----------------|----------------|------------------|----|
| 1  | 114.17         | 57.59          |                |                 |                |                  | L    |                |                |                |                 |                |                  | 34 |
| 2  | 227.32         | 114.17         |                |                 |                |                  | L    | 3813.41        | 1907.21        | 3796.38        | 1898.69         | 3795.40        | 1898.20          | 33 |
| 3  | 298.40         | 149.70         |                |                 |                |                  | A    | 3700.25        | 1850.63        | 3683.22        | 1842.12         | 3682.24        | 1841.62          | 32 |
| 4  | <b>426.53</b>  | 213.77         | 409.50         | 205.25          |                |                  | Q    | 3629.18        | 1815.09        | 3612.15        | 1806.58         | 3611.16        | 1806.08          | 31 |
| 5  | 555.64         | 278.33         | 538.61         | 269.81          | 537.63         | 269.32           | E    | 3501.05        | 1751.03        | 3484.02        | 1742.51         | 3483.03        | 1742.02          | 30 |
| 6  | <b>783.91</b>  | <b>392.46</b>  | 766.88         | 383.94          | 765.90         | 383.45           | C    | 3371.93        | 1686.47        | 3354.90        | 1677.96         | 3353.92        | 1677.46          | 29 |
| 7  | <b>854.99</b>  | <b>428.00</b>  | 837.96         | 419.48          | 836.98         | 418.99           | A    | 3143.67        | <b>1572.34</b> | 3126.63        | <b>1563.82</b>  | 3125.65        | <b>1563.33</b>   | 28 |
| 8  | 954.12         | <b>477.56</b>  | 937.09         | 469.05          | 936.11         | 468.56           | V    | 3072.59        | <b>1536.80</b> | 3055.56        | <b>1528.28</b>  | 3054.57        | <b>1527.79</b>   | 27 |
| 9  | <b>1057.26</b> | <b>529.14</b>  | <b>1040.23</b> | 520.62          | <b>1039.25</b> | 520.13           | C    | 2973.46        | <b>1487.23</b> | 2956.43        | <b>1478.72</b>  | 2955.44        | <b>1478.22</b>   | 26 |
| 10 | <b>1114.32</b> | 557.66         | 1097.29        | 549.15          | 1096.30        | 548.65           | G    | 2870.31        | <b>1435.66</b> | 2853.28        | <b>1427.15</b>  | 2852.30        | <b>1426.65</b>   | 25 |
| 11 | 1300.53        | <b>650.77</b>  | 1283.50        | <b>642.25</b>   | 1282.51        | <b>641.76</b>    | W    | 2813.26        | <b>1407.14</b> | 2796.23        | 1398.62         | 2795.25        | 1398.13          | 24 |
| 12 | 1371.60        | <b>686.31</b>  | 1354.57        | 677.79          | <b>1353.59</b> | 677.30           | A    | 2627.05        | <b>1314.03</b> | 2610.02        | 1305.51         | 2609.04        | 1305.02          | 23 |
| 13 | 1484.76        | <b>742.88</b>  | 1467.73        | <b>734.37</b>   | 1466.75        | <b>733.88</b>    | L    | 2555.97        | <b>1278.49</b> | 2538.94        | 1269.98         | 2537.96        | 1269.48          | 22 |
| 14 | <b>1581.88</b> | <b>791.44</b>  | <b>1564.85</b> | <b>782.93</b>   | <b>1563.86</b> | <b>782.43</b>    | P    | 2442.82        | <b>1221.91</b> | 2425.79        | 1213.40         | 2424.80        | 1212.90          | 21 |
| 15 | 1719.02        | 860.01         | 1701.99        | 851.50          | 1701.00        | 851.00           | H    | 2345.70        | <b>1173.35</b> | 2328.67        | <b>1164.84</b>  | 2327.69        | <b>1164.35</b>   | 20 |
| 16 | 1833.12        | <b>917.06</b>  | 1816.09        | <b>908.55</b>   | 1815.10        | <b>908.06</b>    | N    | 2208.56        | <b>1104.79</b> | 2191.53        | 1096.27         | 2190.55        | 1095.78          | 19 |
| 17 | 1989.30        | 995.16         | 1972.27        | 986.64          | 1971.29        | 986.15           | R    | 2094.46        | <b>1047.73</b> | 2077.43        | <b>1039.22</b>  | 2076.44        | <b>1038.73</b>   | 18 |
| 18 | 2136.50        | 1068.75        | 2119.47        | 1060.24         | 2118.48        | 1059.75          | M    | 1938.27        | <b>969.64</b>  | 1921.24        | 961.13          | 1920.26        | 960.63           | 17 |
| 19 | 2264.63        | 1132.82        | 2247.60        | 1124.30         | 2246.61        | 1123.81          | Q    | 1791.08        | 896.04         | 1774.05        | 887.53          | 1773.06        | 887.04           | 16 |
| 20 | 2335.71        | 1168.36        | 2318.68        | <b>1159.84</b>  | 2317.69        | <b>1159.35</b>   | A    | 1662.95        | 831.98         | 1645.92        | 823.46          | 1644.93        | 822.97           | 15 |
| 21 | 2448.86        | 1224.94        | 2431.83        | 1216.42         | 2430.85        | 1215.93          | L    | 1591.87        | 796.44         | <b>1574.84</b> | 787.92          | <b>1573.86</b> | 787.43           | 14 |
| 22 | 2549.97        | 1275.49        | 2532.94        | 1266.97         | 2531.95        | 1266.48          | T    | <b>1478.71</b> | <b>739.86</b>  | 1461.68        | 731.35          | 1460.70        | 730.85           | 13 |
| 23 | 2637.05        | 1319.03        | 2620.01        | <b>1310.51</b>  | 2619.03        | <b>1310.02</b>   | S    | <b>1377.61</b> | 689.31         | <b>1360.58</b> | 680.79          | <b>1359.59</b> | 680.30           | 12 |
| 24 | 2740.19        | 1370.60        | 2723.16        | 1362.08         | 2722.17        | 1361.59          | C    | 1290.53        | 645.77         | <b>1273.50</b> | 637.25          | <b>1272.52</b> | 636.76           | 11 |
| 25 | 2869.30        | <b>1435.16</b> | 2852.27        | <b>1426.64</b>  | 2851.29        | <b>1426.15</b>   | E    | 1187.39        | 594.20         | 1170.36        | <b>585.68</b>   | 1169.37        | <b>585.19</b>    | 10 |
| 26 | 2972.45        | <b>1486.73</b> | 2955.41        | <b>1478.21</b>  | 2954.43        | <b>1477.72</b>   | C    | <b>1058.28</b> | <b>529.64</b>  | 1041.25        | 521.13          | <b>1040.26</b> | 520.63           | 9  |
| 27 | 3073.55        | <b>1537.28</b> | 3056.52        | <b>1528.76</b>  | 3055.53        | <b>1528.27</b>   | T    | 955.13         | <b>478.07</b>  | 938.10         | 469.56          | 937.12         | 469.06           | 8  |
| 28 | 3186.71        | 1593.86        | 3169.68        | 1585.34         | 3168.69        | 1584.85          | I    | <b>854.03</b>  | <b>427.52</b>  | 837.00         | 419.00          | 836.01         | 418.51           | 7  |
| 29 | 3289.85        | 1645.43        | 3272.82        | 1636.91         | 3271.83        | 1636.42          | C    | <b>740.87</b>  | 370.94         | 723.84         | <b>362.42</b>   | 722.86         | <b>361.93</b>    | 6  |
| 30 | 3386.96        | 1693.99        | 3369.93        | 1685.47         | 3368.95        | 1684.98          | P    | 637.73         | 319.37         | 620.70         | 310.85          | 619.71         | 310.36           | 5  |
| 31 | 3502.05        | 1751.53        | 3485.02        | 1743.01         | 3484.04        | 1742.52          | D    | 540.61         | 270.81         | 523.58         | 262.30          | 522.60         | 261.80           | 4  |
| 32 | 3605.19        | 1803.10        | 3588.16        | 1794.59         | 3587.18        | 1794.09          | C    | 425.53         | 213.27         | 408.50         | 204.75          |                |                  | 3  |
| 33 | 3752.37        | 1876.69        | 3735.34        | 1868.17         | 3734.35        | 1867.68          | F    | 322.38         | 161.70         | 305.35         | 153.18          |                |                  | 2  |
| 34 |                |                |                |                 |                |                  | R    | 175.21         | 88.11          | 158.18         | 79.59           |                |                  | 1  |

Gene Symbol  
RPL10

Sequences  
AKVDEFPL**C**GHMVSDEYEQLSSEALEAAR

m/z  
1076.16

Charge  
3+

Ion score  
131.6

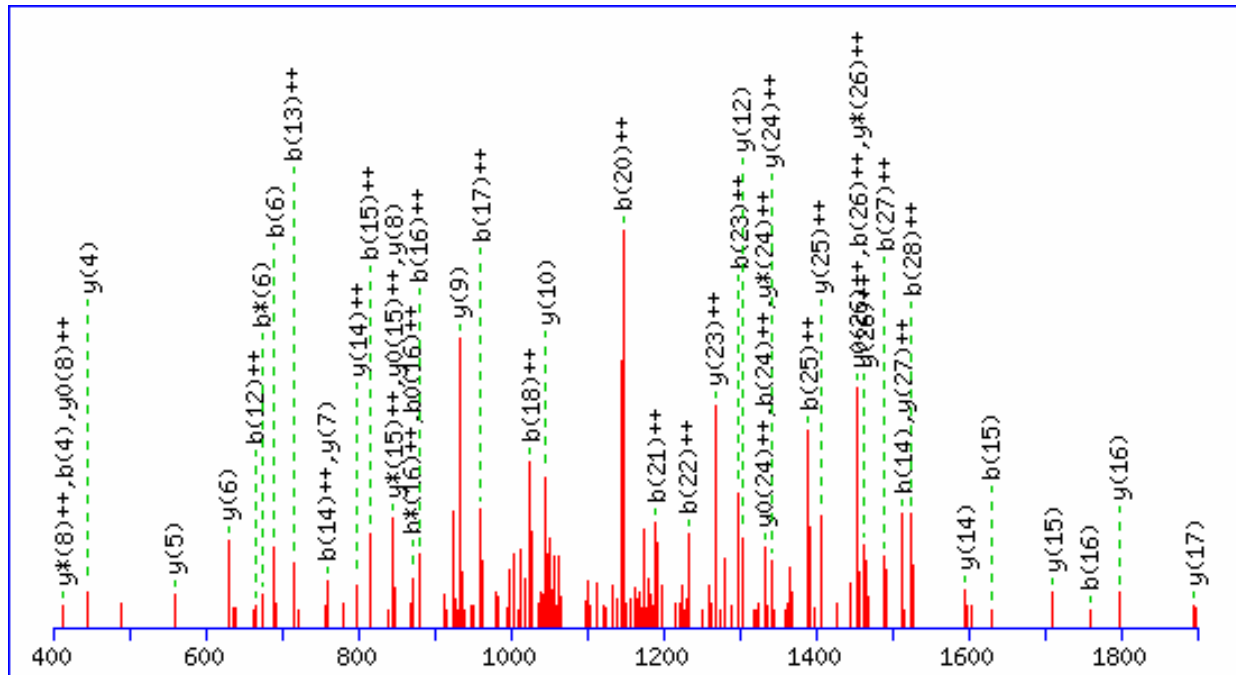

| #  | b       | b <sup>++</sup> | b <sup>+</sup> | b <sup>+-</sup> | b <sup>0</sup> | b <sup>0++</sup> | Seq. | y       | y <sup>++</sup> | y <sup>+</sup> | y <sup>+-</sup> | y <sup>0</sup> | y <sup>0++</sup> | #  |
|----|---------|-----------------|----------------|-----------------|----------------|------------------|------|---------|-----------------|----------------|-----------------|----------------|------------------|----|
| 1  | 72.09   | 36.55           |                |                 |                |                  | A    |         |                 |                |                 |                |                  | 29 |
| 2  | 200.26  | 100.63          | 183.23         | 92.12           |                |                  | K    | 3155.45 | 1578.23         | 3138.42        | 1569.71         | 3137.43        | 1569.22          | 28 |
| 3  | 299.39  | 150.20          | 282.36         | 141.68          |                |                  | V    | 3027.28 | 1514.14         | 3010.25        | 1505.63         | 3009.26        | 1505.13          | 27 |
| 4  | 414.48  | 207.74          | 397.45         | 199.23          | 396.46         | 198.73           | D    | 2928.14 | 1464.58         | 2911.11        | 1456.06         | 2910.13        | 1455.57          | 26 |
| 5  | 543.59  | 272.30          | 526.56         | 263.78          | 525.58         | 263.29           | E    | 2813.06 | 1407.03         | 2796.03        | 1398.52         | 2795.04        | 1398.02          | 25 |
| 6  | 690.76  | 345.89          | 673.73         | 337.37          | 672.75         | 336.88           | F    | 2683.94 | 1342.48         | 2666.91        | 1333.96         | 2665.93        | 1333.47          | 24 |
| 7  | 787.88  | 394.44          | 770.85         | 385.93          | 769.86         | 385.44           | P    | 2536.77 | 1268.89         | 2519.74        | 1260.37         | 2518.75        | 1259.88          | 23 |
| 8  | 901.04  | 451.02          | 884.01         | 442.51          | 883.02         | 442.01           | L    | 2439.65 | 1220.33         | 2422.62        | 1211.82         | 2421.64        | 1211.32          | 22 |
| 9  | 1004.18 | 502.59          | 987.15         | 494.08          | 986.16         | 493.59           | C    | 2326.50 | 1163.75         | 2309.47        | 1155.24         | 2308.48        | 1154.74          | 21 |
| 10 | 1061.23 | 531.12          | 1044.20        | 522.60          | 1043.22        | 522.11           | G    | 2223.35 | 1112.18         | 2206.32        | 1103.67         | 2205.34        | 1103.17          | 20 |
| 11 | 1198.37 | 599.69          | 1181.34        | 591.17          | 1180.36        | 590.68           | H    | 2166.30 | 1083.66         | 2149.27        | 1075.14         | 2148.29        | 1074.65          | 19 |
| 12 | 1329.57 | 665.29          | 1312.54        | 656.77          | 1311.55        | 656.28           | M    | 2029.16 | 1015.09         | 2012.13        | 1006.57         | 2011.15        | 1006.08          | 18 |
| 13 | 1428.70 | 714.85          | 1411.67        | 706.34          | 1410.68        | 705.85           | V    | 1897.97 | 949.49          | 1880.94        | 940.97          | 1879.95        | 940.48           | 17 |
| 14 | 1515.78 | 758.39          | 1498.74        | 749.88          | 1497.76        | 749.38           | S    | 1798.84 | 899.92          | 1781.81        | 891.41          | 1780.82        | 890.91           | 16 |
| 15 | 1630.86 | 815.94          | 1613.83        | 807.42          | 1612.85        | 806.93           | D    | 1711.76 | 856.38          | 1694.73        | 847.87          | 1693.74        | 847.38           | 15 |
| 16 | 1759.98 | 880.49          | 1742.95        | 871.98          | 1741.96        | 871.48           | E    | 1596.67 | 798.84          | 1579.64        | 790.32          | 1578.66        | 789.83           | 14 |
| 17 | 1923.15 | 962.08          | 1906.12        | 953.56          | 1905.13        | 953.07           | Y    | 1467.56 | 734.28          | 1450.53        | 725.77          | 1449.54        | 725.27           | 13 |
| 18 | 2052.26 | 1026.64         | 2035.23        | 1018.12         | 2034.25        | 1017.63          | E    | 1304.38 | 652.70          | 1287.35        | 644.18          | 1286.37        | 643.69           | 12 |
| 19 | 2180.39 | 1090.70         | 2163.36        | 1082.19         | 2162.38        | 1081.69          | Q    | 1175.27 | 588.14          | 1158.24        | 579.62          | 1157.25        | 579.13           | 11 |
| 20 | 2293.55 | 1147.28         | 2276.52        | 1138.76         | 2275.54        | 1138.27          | L    | 1047.14 | 524.07          | 1030.11        | 515.56          | 1029.13        | 515.07           | 10 |
| 21 | 2380.63 | 1190.82         | 2363.60        | 1182.30         | 2362.61        | 1181.81          | S    | 933.98  | 467.50          | 916.95         | 458.98          | 915.97         | 458.49           | 9  |
| 22 | 2467.71 | 1234.36         | 2450.67        | 1225.84         | 2449.69        | 1225.35          | S    | 846.91  | 423.96          | 829.88         | 415.44          | 828.89         | 414.95           | 8  |
| 23 | 2596.82 | 1298.91         | 2579.79        | 1290.40         | 2578.80        | 1289.91          | E    | 759.83  | 380.42          | 742.80         | 371.90          | 741.81         | 371.41           | 7  |
| 24 | 2667.90 | 1334.45         | 2650.87        | 1325.94         | 2649.88        | 1325.44          | A    | 630.71  | 315.86          | 613.68         | 307.35          | 612.70         | 306.85           | 6  |
| 25 | 2781.05 | 1391.03         | 2764.02        | 1382.52         | 2763.04        | 1382.02          | L    | 559.64  | 280.32          | 542.61         | 271.81          | 541.62         | 271.31           | 5  |
| 26 | 2910.17 | 1455.59         | 2893.14        | 1447.07         | 2892.15        | 1446.58          | E    | 446.48  | 223.74          | 429.45         | 215.23          | 428.46         | 214.74           | 4  |
| 27 | 2981.25 | 1491.13         | 2964.22        | 1482.61         | 2963.23        | 1482.12          | A    | 317.36  | 159.19          | 300.33         | 150.67          |                |                  | 3  |
| 28 | 3052.32 | 1526.67         | 3035.29        | 1518.15         | 3034.31        | 1517.66          | A    | 246.29  | 123.65          | 229.26         | 115.13          |                |                  | 2  |
| 29 |         |                 |                |                 |                |                  | R    | 175.21  | 88.11           | 158.18         | 79.59           |                |                  | 1  |



Gene Symbol  
RPL10A

Sequences  
FSV**C**VLGDQQH**C**DEAK

m/z  
952.76

Charge  
2+

Ion score  
69.0

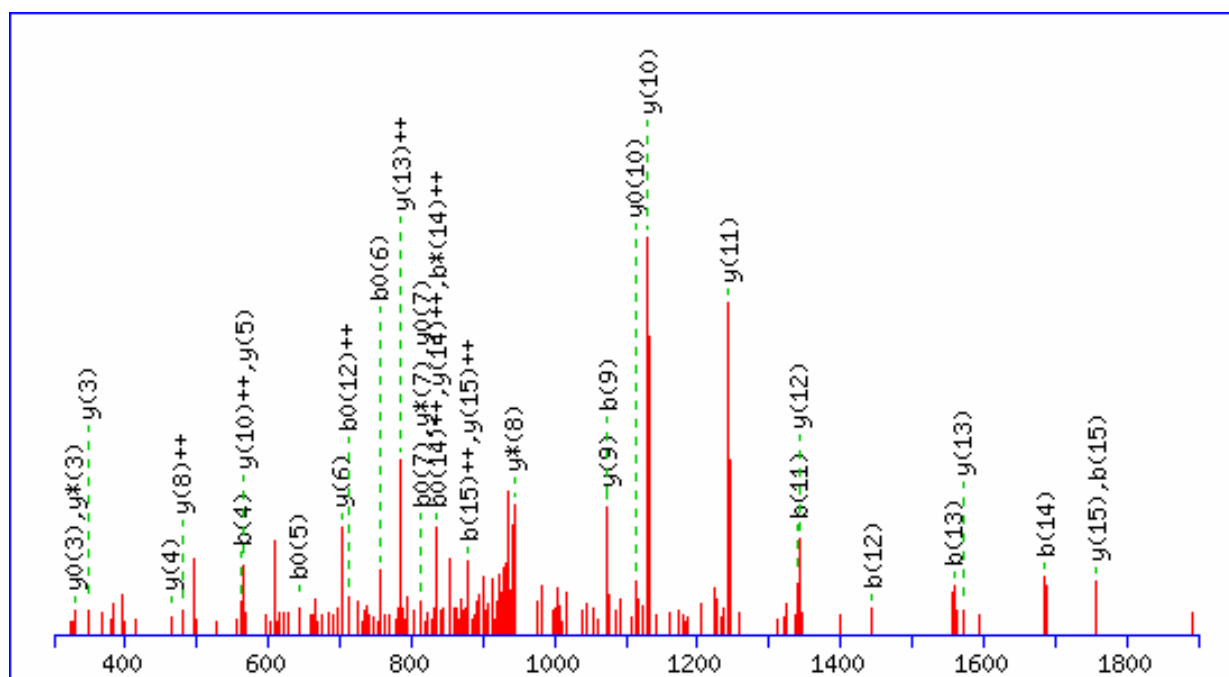

| #  | b       | b <sup>++</sup> | b <sup>*</sup> | b <sup>+++</sup> | b <sup>0</sup> | b <sup>0++</sup> | Seq. | y       | y <sup>++</sup> | y <sup>*</sup> | y <sup>+++</sup> | y <sup>0</sup> | y <sup>0++</sup> | #  |
|----|---------|-----------------|----------------|------------------|----------------|------------------|------|---------|-----------------|----------------|------------------|----------------|------------------|----|
| 1  | 148.18  | 74.59           |                |                  |                |                  | F    |         |                 |                |                  |                |                  | 16 |
| 2  | 235.26  | 118.13          |                |                  | 217.24         | 109.13           | S    | 1757.92 | 879.46          | 1740.89        | 870.95           | 1739.90        | 870.46           | 15 |
| 3  | 334.39  | 167.70          |                |                  | 316.37         | 158.69           | V    | 1670.84 | 835.93          | 1653.81        | 827.41           | 1652.83        | 826.92           | 14 |
| 4  | 562.66  | 281.83          |                |                  | 544.64         | 272.83           | C    | 1571.71 | 786.36          | 1554.68        | 777.84           | 1553.70        | 777.35           | 13 |
| 5  | 661.79  | 331.40          |                |                  | 643.77         | 322.39           | V    | 1343.44 | 672.23          | 1326.41        | 663.71           | 1325.43        | 663.22           | 12 |
| 6  | 774.95  | 387.98          |                |                  | 756.93         | 378.97           | L    | 1244.31 | 622.66          | 1227.28        | 614.14           | 1226.30        | 613.65           | 11 |
| 7  | 832.00  | 416.50          |                |                  | 813.98         | 407.50           | G    | 1131.15 | 566.08          | 1114.12        | 557.57           | 1113.14        | 557.07           | 10 |
| 8  | 947.09  | 474.05          |                |                  | 929.07         | 465.04           | D    | 1074.10 | 537.56          | 1057.07        | 529.04           | 1056.09        | 528.55           | 9  |
| 9  | 1075.22 | 538.11          | 1058.18        | 529.60           | 1057.20        | 529.10           | Q    | 959.02  | 480.01          | 941.98         | 471.50           | 941.00         | 471.00           | 8  |
| 10 | 1203.34 | 602.18          | 1186.31        | 593.66           | 1185.33        | 593.17           | Q    | 830.89  | 415.95          | 813.86         | 407.43           | 812.87         | 406.94           | 7  |
| 11 | 1340.48 | 670.75          | 1323.45        | 662.23           | 1322.47        | 661.74           | H    | 702.76  | 351.88          | 685.73         | 343.37           | 684.74         | 342.87           | 6  |
| 12 | 1443.63 | 722.32          | 1426.60        | 713.80           | 1425.61        | 713.31           | C    | 565.62  | 283.31          | 548.59         | 274.80           | 547.60         | 274.31           | 5  |
| 13 | 1558.71 | 779.86          | 1541.68        | 771.35           | 1540.70        | 770.85           | D    | 462.47  | 231.74          | 445.44         | 223.23           | 444.46         | 222.73           | 4  |
| 14 | 1687.83 | 844.42          | 1670.80        | 835.90           | 1669.81        | 835.41           | E    | 347.39  | 174.20          | 330.36         | 165.68           | 329.37         | 165.19           | 3  |
| 15 | 1758.91 | 879.96          | 1741.88        | 871.44           | 1740.89        | 870.95           | A    | 218.27  | 109.64          | 201.24         | 101.13           |                |                  | 2  |
| 16 |         |                 |                |                  |                |                  | K    | 147.20  | 74.10           | 130.16         | 65.59            |                |                  | 1  |

Gene Symbol  
RPL12

Sequences  
HPHDIIDDINSGAVECPAS

m/z  
995.55

Charge  
2+

Ion score  
74.8

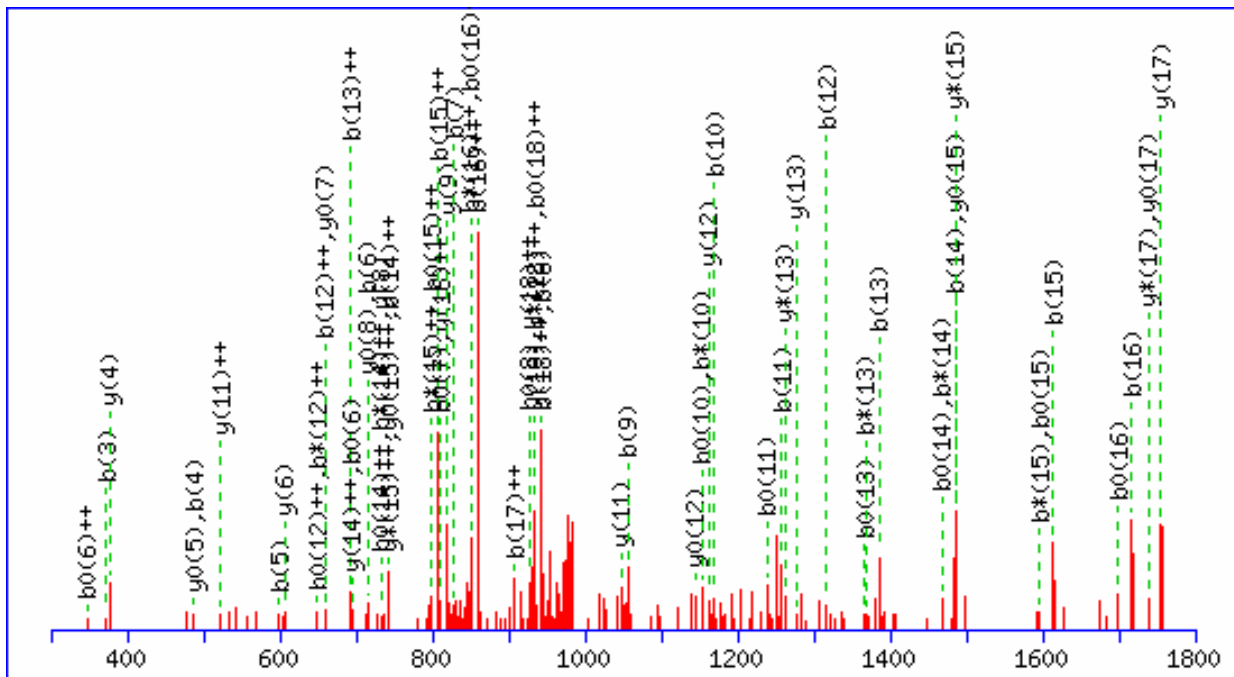

| #  | b              | b <sup>++</sup> | b <sup>*</sup> | b <sup>***</sup> | b <sup>0</sup> | b <sup>0++</sup> | Seq. | y              | y <sup>++</sup> | y <sup>*</sup> | y <sup>***</sup> | y <sup>0</sup> | y <sup>0++</sup> | #  |
|----|----------------|-----------------|----------------|------------------|----------------|------------------|------|----------------|-----------------|----------------|------------------|----------------|------------------|----|
| 1  | 138.15         | 69.58           |                |                  |                |                  | H    |                |                 |                |                  |                |                  | 19 |
| 2  | 235.26         | 118.14          |                |                  |                |                  | P    | 1853.98        | <b>927.49</b>   | 1836.95        | 918.98           | 1835.96        | 918.49           | 18 |
| 3  | <b>372.40</b>  | 186.70          |                |                  |                |                  | H    | <b>1756.87</b> | 878.94          | <b>1739.83</b> | 870.42           | <b>1738.85</b> | 869.93           | 17 |
| 4  | <b>487.49</b>  | 244.25          |                |                  | 469.47         | 235.24           | D    | 1619.73        | <b>810.37</b>   | 1602.70        | 801.85           | 1601.71        | 801.36           | 16 |
| 5  | <b>600.65</b>  | 300.83          |                |                  | 582.63         | 291.82           | I    | 1504.64        | 752.82          | <b>1487.61</b> | <b>744.31</b>    | <b>1486.62</b> | <b>743.82</b>    | 15 |
| 6  | <b>713.80</b>  | 357.41          |                |                  | <b>695.79</b>  | <b>348.40</b>    | I    | 1391.48        | <b>696.24</b>   | 1374.45        | 687.73           | 1373.47        | 687.24           | 14 |
| 7  | <b>828.89</b>  | 414.95          |                |                  | <b>810.88</b>  | 405.94           | D    | <b>1278.32</b> | 639.67          | <b>1261.29</b> | 631.15           | 1260.31        | 630.66           | 13 |
| 8  | <b>943.98</b>  | 472.49          |                |                  | <b>925.96</b>  | 463.49           | D    | <b>1163.24</b> | 582.12          | 1146.21        | 573.61           | <b>1145.22</b> | 573.11           | 12 |
| 9  | <b>1057.14</b> | 529.07          |                |                  | 1039.12        | 520.06           | I    | <b>1048.15</b> | <b>524.58</b>   | 1031.12        | 516.06           | 1030.13        | 515.57           | 11 |
| 10 | <b>1171.24</b> | 586.12          | <b>1154.21</b> | 577.61           | <b>1153.22</b> | 577.12           | N    | <b>934.99</b>  | 468.00          | 917.96         | 459.48           | 916.98         | 458.99           | 10 |
| 11 | <b>1258.32</b> | 629.66          | 1241.29        | 621.15           | <b>1240.30</b> | 620.65           | S    | <b>820.89</b>  | 410.95          |                |                  | 802.87         | 401.94           | 9  |
| 12 | <b>1315.37</b> | <b>658.19</b>   | 1298.34        | <b>649.67</b>    | 1297.35        | <b>649.18</b>    | G    | <b>733.81</b>  | 367.41          |                |                  | <b>715.80</b>  | 358.40           | 8  |
| 13 | <b>1386.45</b> | <b>693.73</b>   | <b>1369.42</b> | 685.21           | <b>1368.43</b> | 684.72           | A    | 676.76         | 338.88          |                |                  | <b>658.74</b>  | 329.88           | 7  |
| 14 | <b>1485.58</b> | <b>743.29</b>   | <b>1468.55</b> | <b>734.78</b>    | <b>1467.56</b> | <b>734.28</b>    | V    | <b>605.68</b>  | 303.34          |                |                  | 587.67         | 294.34           | 6  |
| 15 | <b>1614.69</b> | <b>807.85</b>   | <b>1597.66</b> | <b>799.33</b>    | <b>1596.68</b> | <b>798.84</b>    | E    | 506.55         | 253.78          |                |                  | <b>488.54</b>  | 244.77           | 5  |
| 16 | <b>1717.83</b> | <b>859.42</b>   | 1700.80        | <b>850.91</b>    | <b>1699.82</b> | <b>850.41</b>    | C    | <b>377.44</b>  | 189.22          |                |                  | 359.42         | 180.21           | 4  |
| 17 | 1814.95        | <b>907.98</b>   | 1797.92        | 899.46           | 1796.93        | 898.97           | P    | 274.29         | 137.65          |                |                  | 256.28         | 128.64           | 3  |
| 18 | 1886.03        | <b>943.52</b>   | 1869.00        | <b>935.00</b>    | 1868.01        | <b>934.51</b>    | A    | 177.18         | 89.09           |                |                  | 159.16         | 80.09            | 2  |
| 19 |                |                 |                |                  |                |                  | S    | 106.10         | 53.55           |                |                  | 88.09          | 44.55            | 1  |

Gene Symbol  
RPL18A

Sequences  
EYRDLTTAGAVTQ**C**YR

m/z  
616.79

Charge  
3+

Ion score  
67.5

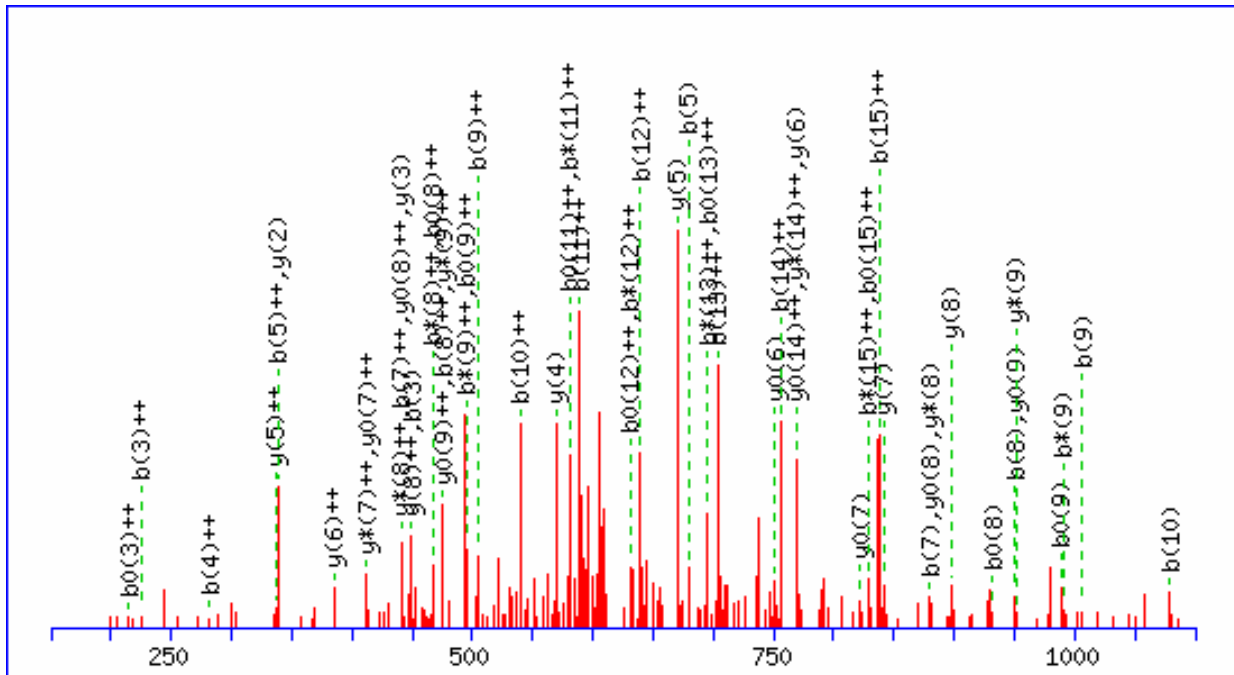

| #  | b              | b <sup>++</sup> | b <sup>*</sup> | b <sup>*++</sup> | b <sup>0</sup> | b <sup>0++</sup> | Seq. | y             | y <sup>++</sup> | y <sup>*</sup> | y <sup>*++</sup> | y <sup>0</sup> | y <sup>0++</sup> | #  |
|----|----------------|-----------------|----------------|------------------|----------------|------------------|------|---------------|-----------------|----------------|------------------|----------------|------------------|----|
| 1  | 130.12         | 65.56           |                |                  | 112.11         | 56.56            | E    |               |                 |                |                  |                |                  | 16 |
| 2  | 293.30         | 147.15          |                |                  | 275.28         | 138.14           | Y    | 1718.91       | 859.96          | 1701.88        | 851.44           | 1700.89        | 850.95           | 15 |
| 3  | <b>449.48</b>  | <b>225.24</b>   | 432.45         | 216.73           | 431.47         | <b>216.24</b>    | R    | 1555.73       | 778.37          | 1538.70        | <b>769.86</b>    | 1537.72        | <b>769.36</b>    | 14 |
| 4  | 564.57         | <b>282.79</b>   | 547.54         | 274.27           | 546.55         | 273.78           | D    | 1399.55       | 700.28          | 1382.52        | 691.76           | 1381.53        | 691.27           | 13 |
| 5  | <b>677.73</b>  | <b>339.37</b>   | 660.70         | 330.85           | 659.71         | 330.36           | L    | 1284.46       | 642.73          | 1267.43        | 634.22           | 1266.45        | 633.73           | 12 |
| 6  | 778.83         | 389.92          | 761.80         | 381.40           | 760.81         | 380.91           | T    | 1171.30       | 586.16          | 1154.27        | 577.64           | 1153.29        | 577.15           | 11 |
| 7  | <b>879.93</b>  | <b>440.47</b>   | 862.90         | 431.96           | 861.92         | 431.46           | T    | 1070.20       | 535.60          | 1053.17        | 527.09           | 1052.19        | 526.60           | 10 |
| 8  | <b>951.01</b>  | <b>476.01</b>   | 933.98         | <b>467.49</b>    | <b>933.00</b>  | <b>467.00</b>    | A    | 969.10        | 485.05          | <b>952.07</b>  | <b>476.54</b>    | <b>951.08</b>  | <b>476.04</b>    | 9  |
| 9  | <b>1008.06</b> | <b>504.54</b>   | <b>991.03</b>  | <b>496.02</b>    | <b>990.05</b>  | <b>495.53</b>    | G    | <b>898.02</b> | <b>449.51</b>   | <b>880.99</b>  | <b>441.00</b>    | <b>880.00</b>  | <b>440.51</b>    | 8  |
| 10 | <b>1079.14</b> | <b>540.07</b>   | 1062.11        | 531.56           | 1061.13        | 531.07           | A    | <b>840.97</b> | 420.99          | 823.94         | <b>412.47</b>    | <b>822.95</b>  | <b>411.98</b>    | 7  |
| 11 | 1178.27        | <b>589.64</b>   | 1161.24        | <b>581.12</b>    | 1160.26        | <b>580.63</b>    | V    | <b>769.89</b> | <b>385.45</b>   | 752.86         | 376.93           | <b>751.87</b>  | 376.44           | 6  |
| 12 | 1279.38        | <b>640.19</b>   | 1262.35        | <b>631.68</b>    | 1261.36        | <b>631.18</b>    | T    | <b>670.76</b> | <b>335.88</b>   | 653.73         | 327.37           | 652.74         | 326.88           | 5  |
| 13 | 1407.51        | <b>704.26</b>   | 1390.47        | <b>695.74</b>    | 1389.49        | <b>695.25</b>    | Q    | <b>569.65</b> | 285.33          | 552.62         | 276.82           |                |                  | 4  |
| 14 | 1510.65        | <b>755.83</b>   | 1493.62        | 747.31           | 1492.63        | 746.82           | C    | <b>441.53</b> | 221.27          | 424.49         | 212.75           |                |                  | 3  |
| 15 | 1673.82        | <b>837.41</b>   | 1656.79        | <b>828.90</b>    | 1655.81        | <b>828.41</b>    | Y    | <b>338.38</b> | 169.70          | 321.35         | 161.18           |                |                  | 2  |
| 16 |                |                 |                |                  |                |                  | R    | 175.21        | 88.11           | 158.18         | 79.59            |                |                  | 1  |

Gene Symbol  
RPL34

Sequences  
SACGVCPGR

m/z  
488.74

Charge  
2+

Ion score  
52.6

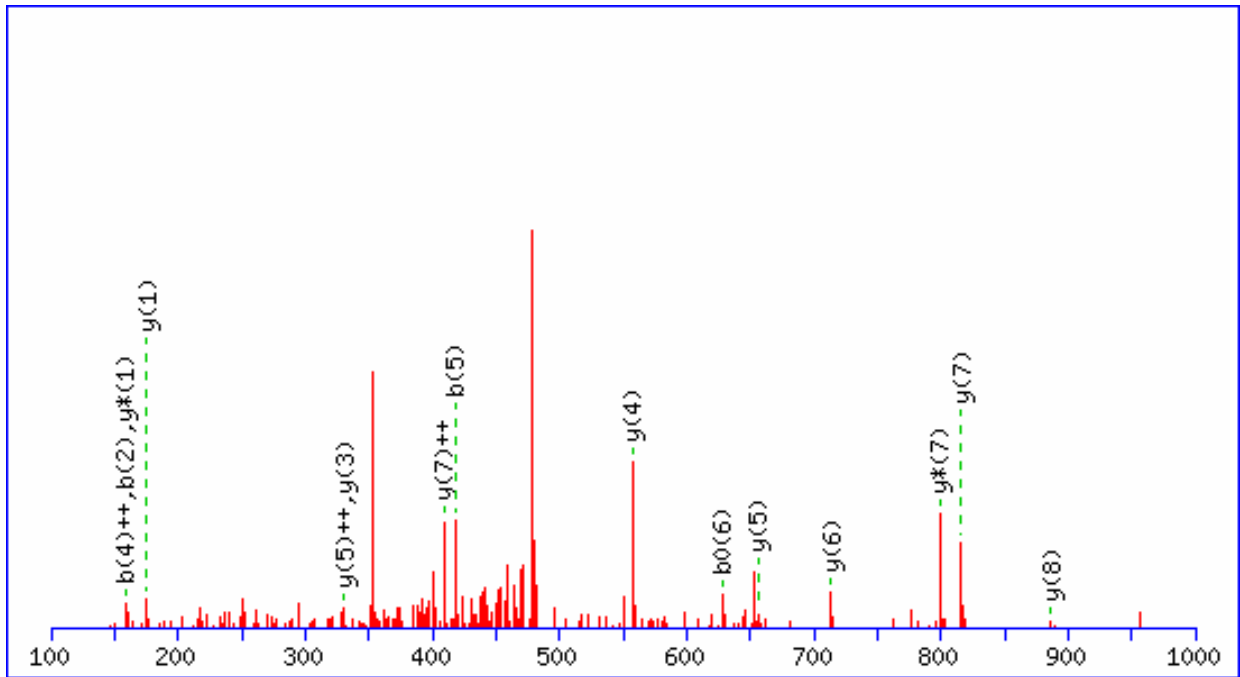

C6 : NEM (C)

| # | b             | b <sup>++</sup> | b <sup>0</sup> | b <sup>0++</sup> | Seq. | y             | y <sup>++</sup> | y <sup>*</sup> | y <sup>*++</sup> | # |
|---|---------------|-----------------|----------------|------------------|------|---------------|-----------------|----------------|------------------|---|
| 1 | 88.09         | 44.55           | 70.07          | 35.54            | S    |               |                 |                |                  | 9 |
| 2 | <b>159.16</b> | 80.09           | 141.15         | 71.08            | A    | <b>888.05</b> | 444.53          | 871.02         | 436.01           | 8 |
| 3 | 262.31        | 131.66          | 244.29         | 122.65           | C    | <b>816.97</b> | <b>408.99</b>   | <b>799.94</b>  | 400.47           | 7 |
| 4 | 319.36        | <b>160.18</b>   | 301.34         | 151.17           | G    | <b>713.83</b> | 357.42          | 696.80         | 348.90           | 6 |
| 5 | <b>418.49</b> | 209.75          | 400.47         | 200.74           | V    | <b>656.77</b> | <b>328.89</b>   | 639.74         | 320.38           | 5 |
| 6 | 646.76        | 323.88          | <b>628.74</b>  | 314.87           | C    | <b>557.64</b> | 279.33          | 540.61         | 270.81           | 4 |
| 7 | 743.87        | 372.44          | 725.86         | 363.43           | P    | <b>329.38</b> | 165.19          | 312.34         | 156.68           | 3 |
| 8 | 800.92        | 400.97          | 782.91         | 391.96           | G    | 232.26        | 116.63          | 215.23         | 108.12           | 2 |
| 9 |               |                 |                |                  | R    | <b>175.21</b> | 88.11           | <b>158.18</b>  | 79.59            | 1 |

Gene Symbol RPL8 Sequences AQLNIGNVLPVGTMPGEGTIVCCLEEKPGDRGK m/z 867.04 Charge 4+ Ion score 46.5

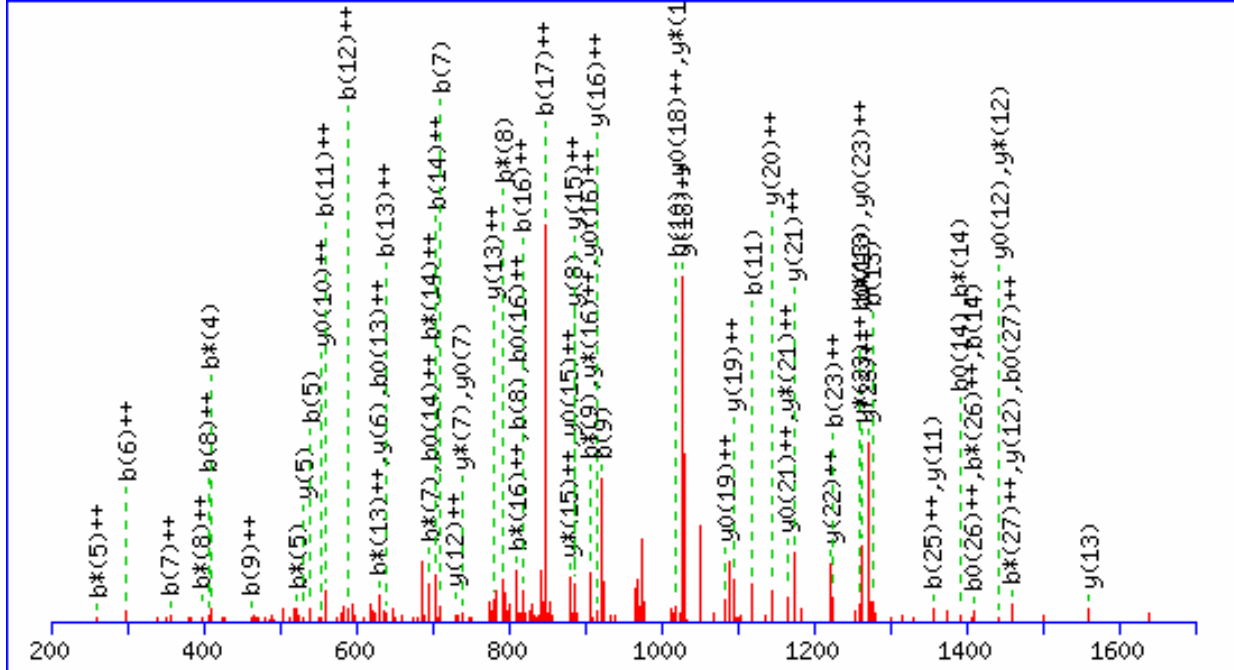

C22 : NEM (C)

| #  | b       | b <sup>+</sup> | b <sup>+</sup> | b <sup>++</sup> | b <sup>0</sup> | b <sup>0+</sup> | Seq. | y       | y <sup>+</sup> | y <sup>+</sup> | y <sup>++</sup> | y <sup>0</sup> | y <sup>0+</sup> | #  |
|----|---------|----------------|----------------|-----------------|----------------|-----------------|------|---------|----------------|----------------|-----------------|----------------|-----------------|----|
| 1  | 72.09   | 36.55          |                |                 |                |                 | A    |         |                |                |                 |                |                 | 32 |
| 2  | 200.22  | 100.61         | 183.18         | 92.10           |                |                 | Q    | 3394.92 | 1697.96        | 3377.89        | 1689.45         | 3376.90        | 1688.95         | 31 |
| 3  | 313.37  | 157.19         | 296.34         | 148.68          |                |                 | L    | 3266.79 | 1633.90        | 3249.76        | 1625.38         | 3248.77        | 1624.89         | 30 |
| 4  | 427.48  | 214.24         | 410.44         | 205.73          |                |                 | N    | 3153.63 | 1577.32        | 3136.60        | 1568.80         | 3135.61        | 1568.31         | 29 |
| 5  | 540.63  | 270.82         | 523.60         | 262.31          |                |                 | I    | 3039.53 | 1520.27        | 3022.50        | 1511.75         | 3021.51        | 1511.26         | 28 |
| 6  | 597.68  | 299.35         | 580.65         | 290.83          |                |                 | G    | 2926.37 | 1463.69        | 2909.34        | 1455.17         | 2908.35        | 1454.68         | 27 |
| 7  | 711.79  | 356.40         | 694.76         | 347.88          |                |                 | N    | 2869.32 | 1435.16        | 2852.29        | 1426.65         | 2851.30        | 1426.16         | 26 |
| 8  | 810.92  | 405.96         | 793.89         | 397.45          |                |                 | V    | 2755.21 | 1378.11        | 2738.18        | 1369.60         | 2737.20        | 1369.10         | 25 |
| 9  | 924.08  | 462.54         | 907.04         | 454.03          |                |                 | L    | 2656.08 | 1328.55        | 2639.05        | 1320.03         | 2638.07        | 1319.54         | 24 |
| 10 | 1021.19 | 511.10         | 1004.16        | 502.58          |                |                 | P    | 2542.93 | 1271.97        | 2525.90        | 1263.45         | 2524.91        | 1262.96         | 23 |
| 11 | 1120.32 | 560.66         | 1103.29        | 552.15          |                |                 | V    | 2445.81 | 1223.41        | 2428.78        | 1214.89         | 2427.80        | 1214.40         | 22 |
| 12 | 1177.37 | 589.19         | 1160.34        | 580.68          |                |                 | G    | 2346.68 | 1173.84        | 2329.65        | 1165.33         | 2328.66        | 1164.84         | 21 |
| 13 | 1278.48 | 639.74         | 1261.45        | 631.23          | 1260.46        | 630.73          | T    | 2289.63 | 1145.32        | 2272.60        | 1136.80         | 2271.61        | 1136.31         | 20 |
| 14 | 1409.67 | 705.34         | 1392.64        | 696.83          | 1391.66        | 696.33          | M    | 2188.52 | 1094.77        | 2171.49        | 1086.25         | 2170.51        | 1085.76         | 19 |
| 15 | 1506.79 | 753.90         | 1489.76        | 745.38          | 1488.77        | 744.89          | P    | 2057.33 | 1029.17        | 2040.30        | 1020.65         | 2039.31        | 1020.16         | 18 |
| 16 | 1635.90 | 818.46         | 1618.87        | 809.94          | 1617.89        | 809.45          | E    | 1960.21 | 980.61         | 1943.18        | 972.10          | 1942.20        | 971.60          | 17 |
| 17 | 1692.95 | 846.98         | 1675.92        | 838.47          | 1674.94        | 837.97          | G    | 1831.10 | 916.05         | 1814.07        | 907.54          | 1813.08        | 907.05          | 16 |
| 18 | 1794.06 | 897.53         | 1777.03        | 889.02          | 1776.04        | 888.53          | T    | 1774.05 | 887.53         | 1757.02        | 879.01          | 1756.03        | 878.52          | 15 |
| 19 | 1907.22 | 954.11         | 1890.18        | 945.60          | 1889.20        | 945.10          | I    | 1672.94 | 836.98         | 1655.91        | 828.46          | 1654.93        | 827.97          | 14 |
| 20 | 2006.35 | 1003.68        | 1989.32        | 995.16          | 1988.33        | 994.67          | V    | 1559.79 | 780.40         | 1542.76        | 771.88          | 1541.77        | 771.39          | 13 |
| 21 | 2109.49 | 1055.25        | 2092.46        | 1046.73         | 2091.47        | 1046.24         | C    | 1460.66 | 730.83         | 1443.62        | 722.32          | 1442.64        | 721.82          | 12 |
| 22 | 2337.76 | 1169.38        | 2320.73        | 1160.87         | 2319.74        | 1160.37         | C    | 1357.51 | 679.26         | 1340.48        | 670.74          | 1339.50        | 670.25          | 11 |
| 23 | 2450.91 | 1225.96        | 2433.88        | 1217.45         | 2432.90        | 1216.95         | L    | 1129.24 | 565.13         | 1112.21        | 556.61          | 1111.23        | 556.12          | 10 |
| 24 | 2580.03 | 1290.52        | 2563.00        | 1282.00         | 2562.01        | 1281.51         | E    | 1016.09 | 508.55         | 999.06         | 500.03          | 998.07         | 499.54          | 9  |
| 25 | 2709.14 | 1355.08        | 2692.11        | 1346.56         | 2691.13        | 1346.07         | E    | 886.97  | 443.99         | 869.94         | 435.48          | 868.96         | 434.98          | 8  |
| 26 | 2837.32 | 1419.16        | 2820.28        | 1410.65         | 2819.30        | 1410.15         | K    | 757.86  | 379.43         | 740.83         | 370.92          | 739.84         | 370.43          | 7  |
| 27 | 2934.43 | 1467.72        | 2917.40        | 1459.20         | 2916.42        | 1458.71         | P    | 629.69  | 315.35         | 612.66         | 306.83          | 611.67         | 306.34          | 6  |
| 28 | 2991.48 | 1496.24        | 2974.45        | 1487.73         | 2973.47        | 1487.24         | G    | 532.57  | 266.79         | 515.54         | 258.27          | 514.56         | 257.78          | 5  |
| 29 | 3106.57 | 1553.79        | 3089.54        | 1545.27         | 3088.55        | 1544.78         | D    | 475.52  | 238.26         | 458.49         | 229.75          | 457.50         | 229.26          | 4  |
| 30 | 3262.75 | 1631.88        | 3245.72        | 1623.37         | 3244.74        | 1622.87         | R    | 360.43  | 180.72         | 343.40         | 172.20          |                |                 | 3  |
| 31 | 3319.81 | 1660.41        | 3302.78        | 1651.89         | 3301.79        | 1651.40         | G    | 204.25  | 102.63         | 187.22         | 94.11           |                |                 | 2  |
| 32 |         |                |                |                 |                |                 | K    | 147.20  | 74.10          | 130.17         | 65.59           |                |                 | 1  |

Gene Symbol  
RPLP0

Sequences  
AGAIAP**C**EVTVPAQNTGLGPEK

m/z  
1062.85

Charge  
2+

Ion score  
90.5

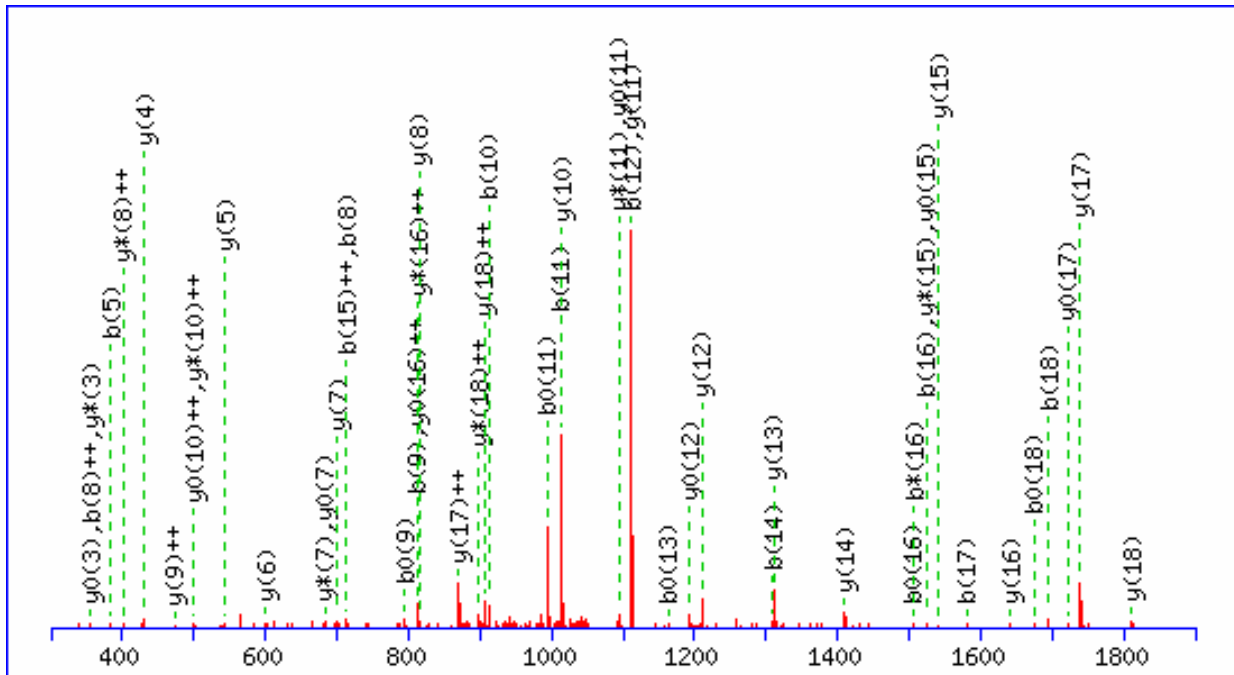

| #  | b              | b <sup>++</sup> | b <sup>*</sup> | b <sup>+++</sup> | b <sup>0</sup> | b <sup>0++</sup> | Seq. | y              | y <sup>++</sup> | y <sup>*</sup> | y <sup>+++</sup> | y <sup>0</sup> | y <sup>0++</sup> | #  |
|----|----------------|-----------------|----------------|------------------|----------------|------------------|------|----------------|-----------------|----------------|------------------|----------------|------------------|----|
| 1  | 72.09          | 36.55           |                |                  |                |                  | A    |                |                 |                |                  |                |                  | 22 |
| 2  | 129.14         | 65.07           |                |                  |                |                  | G    | 2053.32        | 1027.16         | 2036.29        | 1018.65          | 2035.30        | 1018.15          | 21 |
| 3  | 200.22         | 100.61          |                |                  |                |                  | A    | 1996.27        | 998.64          | 1979.23        | 990.12           | 1978.25        | 989.63           | 20 |
| 4  | 313.37         | 157.19          |                |                  |                |                  | I    | 1925.19        | 963.10          | 1908.16        | 954.58           | 1907.17        | 954.09           | 19 |
| 5  | <b>384.45</b>  | 192.73          |                |                  |                |                  | A    | <b>1812.03</b> | <b>906.52</b>   | 1795.00        | <b>898.00</b>    | 1794.01        | 897.51           | 18 |
| 6  | 481.57         | 241.29          |                |                  |                |                  | P    | <b>1740.95</b> | <b>870.98</b>   | 1723.92        | 862.46           | <b>1722.94</b> | 861.97           | 17 |
| 7  | 584.71         | 292.86          |                |                  |                |                  | C    | <b>1643.84</b> | 822.42          | 1626.81        | <b>813.91</b>    | 1625.82        | <b>813.41</b>    | 16 |
| 8  | <b>713.82</b>  | <b>357.42</b>   |                |                  | 695.81         | 348.41           | E    | <b>1540.69</b> | 770.85          | <b>1523.66</b> | 762.34           | <b>1522.68</b> | 761.84           | 15 |
| 9  | <b>812.95</b>  | 406.98          |                |                  | <b>794.94</b>  | 397.97           | V    | <b>1411.58</b> | 706.29          | 1394.55        | 697.78           | 1393.56        | 697.29           | 14 |
| 10 | <b>914.06</b>  | 457.53          |                |                  | 896.04         | 448.53           | T    | <b>1312.45</b> | 656.73          | 1295.42        | 648.21           | 1294.43        | 647.72           | 13 |
| 11 | <b>1013.19</b> | 507.10          |                |                  | <b>995.17</b>  | 498.09           | V    | <b>1211.34</b> | 606.18          | 1194.31        | 597.66           | <b>1193.33</b> | 597.17           | 12 |
| 12 | <b>1110.30</b> | 555.66          |                |                  | 1092.29        | 546.65           | P    | <b>1112.21</b> | 556.61          | <b>1095.18</b> | 548.10           | <b>1094.20</b> | 547.60           | 11 |
| 13 | 1181.38        | 591.19          |                |                  | <b>1163.37</b> | 582.19           | A    | <b>1015.10</b> | 508.05          | 998.07         | <b>499.54</b>    | 997.08         | <b>499.05</b>    | 10 |
| 14 | <b>1309.51</b> | 655.26          | 1292.48        | 646.74           | 1291.50        | 646.25           | Q    | 944.02         | <b>472.51</b>   | 926.99         | 464.00           | 926.01         | 463.51           | 9  |
| 15 | 1423.61        | <b>712.31</b>   | 1406.58        | 703.80           | 1405.60        | 703.30           | N    | <b>815.89</b>  | 408.45          | 798.86         | <b>399.93</b>    | 797.88         | 399.44           | 8  |
| 16 | <b>1524.72</b> | 762.86          | <b>1507.69</b> | 754.35           | <b>1506.70</b> | 753.86           | T    | <b>701.79</b>  | 351.40          | <b>684.76</b>  | 342.88           | <b>683.77</b>  | 342.39           | 7  |
| 17 | <b>1581.77</b> | 791.39          | 1564.74        | 782.87           | 1563.75        | 782.38           | G    | <b>600.68</b>  | 300.85          | 583.65         | 292.33           | 582.67         | 291.84           | 6  |
| 18 | <b>1694.93</b> | 847.97          | 1677.90        | 839.45           | <b>1676.91</b> | 838.96           | L    | <b>543.63</b>  | 272.32          | 526.60         | 263.81           | 525.62         | 263.31           | 5  |
| 19 | 1751.98        | 876.49          | 1734.95        | 867.98           | 1733.96        | 867.49           | G    | <b>430.48</b>  | 215.74          | 413.45         | 207.23           | 412.46         | 206.73           | 4  |
| 20 | 1849.09        | 925.05          | 1832.06        | 916.54           | 1831.08        | 916.04           | P    | 373.42         | 187.22          | <b>356.39</b>  | 178.70           | <b>355.41</b>  | 178.21           | 3  |
| 21 | 1978.21        | 989.61          | 1961.18        | 981.09           | 1960.19        | 980.60           | E    | 276.31         | 138.66          | 259.28         | 130.14           | 258.29         | 129.65           | 2  |
| 22 |                |                 |                |                  |                |                  | K    | 147.20         | 74.10           | 130.17         | 65.59            |                |                  | 1  |

Gene Symbol  
RPLP1

Sequences  
ALANVNI<sup>L</sup>GLICNVGAGGPAPAAGAAPAGGPAPSTAAAPAEK

m/z  
939.43

Charge  
4+

Ion score  
81.9

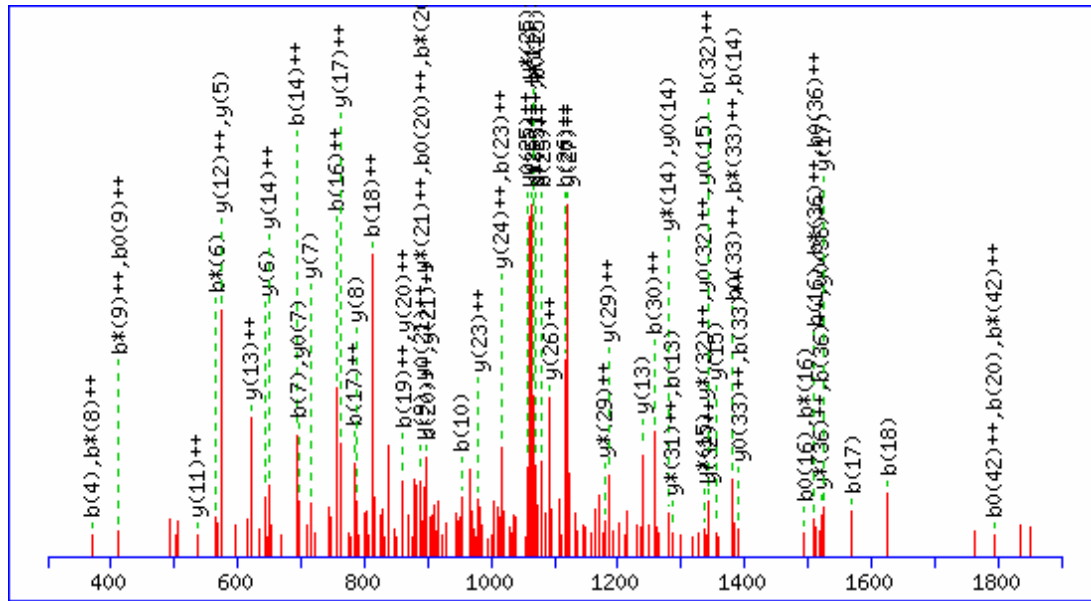

| #  | b              | b <sup>-</sup> | b <sup>+</sup> | b <sup>++</sup> | b <sup>0</sup> | b <sup>+-</sup> | Seq. | y              | y <sup>-</sup> | y <sup>+</sup> | y <sup>++</sup> | y <sup>0</sup> | y <sup>+-</sup> | #  |
|----|----------------|----------------|----------------|-----------------|----------------|-----------------|------|----------------|----------------|----------------|-----------------|----------------|-----------------|----|
| 1  | 72.09          | 36.55          |                |                 |                |                 | A    |                |                |                |                 |                |                 | 43 |
| 2  | 185.24         | 93.13          |                |                 |                |                 | L    | 3683.09        | 1842.05        | 3666.06        | 1833.53         | 3665.07        | 1833.04         | 42 |
| 3  | 256.32         | 128.66         |                |                 |                |                 | A    | 3569.93        | 1783.47        | 3552.90        | 1776.95         | 3551.92        | 1776.46         | 41 |
| 4  | <b>370.42</b>  | 185.72         | 353.39         | 177.20          |                |                 | N    | 3498.85        | 1749.93        | 3481.82        | 1741.42         | 3480.84        | 1740.92         | 40 |
| 5  | 469.56         | 235.28         | 452.52         | 226.77          |                |                 | V    | 3384.75        | 1692.38        | 3367.72        | 1684.36         | 3366.73        | 1683.87         | 39 |
| 6  | 583.66         | 292.33         | <b>566.63</b>  | 283.82          |                |                 | N    | 3285.62        | 1643.31        | 3268.59        | 1634.80         | 3267.60        | 1634.31         | 38 |
| 7  | <b>696.82</b>  | 348.91         | 679.78         | 340.40          |                |                 | I    | 3171.52        | 1588.26        | 3154.49        | 1577.75         | 3153.50        | 1577.25         | 37 |
| 8  | 753.87         | 377.44         | 736.84         | <b>368.92</b>   |                |                 | G    | 3058.36        | 1529.68        | 3041.33        | <b>1521.17</b>  | 3040.34        | <b>1520.68</b>  | 36 |
| 9  | 840.94         | 420.98         | 823.91         | <b>412.46</b>   | 822.93         | <b>411.97</b>   | S    | 3001.31        | 1501.16        | 2984.28        | 1492.64         | 2983.29        | 1492.15         | 35 |
| 10 | <b>954.10</b>  | 477.55         | 937.07         | 469.04          | 936.09         | 468.55          | L    | 2914.23        | 1457.62        | 2897.20        | 1449.10         | 2896.22        | 1448.61         | 34 |
| 11 | <b>1067.26</b> | 534.13         | 1050.23        | 525.62          | 1049.24        | 525.13          | I    | 2801.07        | 1401.04        | 2784.04        | 1392.53         | 2783.06        | <b>1392.03</b>  | 33 |
| 12 | 1170.40        | 585.70         | 1153.37        | 577.19          | 1152.39        | 576.70          | C    | 2687.92        | <b>1344.46</b> | 2670.88        | <b>1335.95</b>  | 2669.90        | <b>1335.45</b>  | 32 |
| 13 | <b>1284.50</b> | 642.76         | 1267.47        | 634.24          | 1266.49        | 633.75          | N    | 2584.77        | 1292.89        | 2567.74        | <b>1284.37</b>  | 2566.76        | 1283.88         | 31 |
| 14 | <b>1383.64</b> | <b>692.32</b>  | 1366.61        | 683.81          | 1365.62        | 683.31          | V    | 2470.67        | 1235.84        | 2453.64        | 1227.32         | 2452.65        | 1226.83         | 30 |
| 15 | 1440.69        | 720.85         | 1423.66        | 712.33          | 1422.67        | 711.84          | G    | 2371.54        | <b>1186.27</b> | 2354.51        | <b>1177.76</b>  | 2353.52        | 1177.27         | 29 |
| 16 | <b>1511.76</b> | <b>756.39</b>  | <b>1494.73</b> | 747.87          | <b>1493.75</b> | 747.38          | A    | 2314.49        | 1157.75        | 2297.46        | 1149.23         | 2296.47        | 1148.74         | 28 |
| 17 | <b>1568.82</b> | <b>784.91</b>  | 1551.79        | 776.40          | 1550.80        | 775.90          | G    | 2243.41        | <b>1122.21</b> | 2226.38        | 1113.69         | 2225.39        | 1113.20         | 27 |
| 18 | <b>1625.87</b> | <b>813.44</b>  | 1608.84        | 804.92          | 1607.85        | 804.43          | G    | 2186.36        | <b>1093.68</b> | 2169.33        | 1085.17         | 2168.34        | 1084.88         | 26 |
| 19 | 1722.98        | <b>862.00</b>  | 1705.95        | 853.48          | 1704.97        | 852.99          | P    | 2129.31        | <b>1065.16</b> | 2112.28        | <b>1056.64</b>  | 2111.29        | <b>1056.15</b>  | 25 |
| 20 | <b>1794.06</b> | <b>897.53</b>  | 1777.03        | <b>889.02</b>   | 1776.05        | <b>888.53</b>   | A    | 2032.19        | <b>1016.60</b> | 2015.16        | 1008.08         | 2014.18        | 1007.59         | 24 |
| 21 | 1891.18        | 946.09         | 1874.15        | 937.38          | 1873.16        | 937.08          | P    | 1961.11        | <b>981.06</b>  | 1944.08        | 972.55          | 1943.10        | 972.05          | 23 |
| 22 | 1962.25        | 981.63         | 1945.22        | 973.12          | 1944.24        | 972.62          | A    | 1864.00        | 952.50         | 1846.97        | 923.99          | 1845.98        | 923.50          | 22 |
| 23 | 2033.33        | <b>1017.17</b> | 2016.30        | 1008.65         | 2015.32        | 1008.16         | A    | 1792.92        | <b>896.96</b>  | 1775.89        | <b>888.45</b>   | 1774.91        | <b>887.96</b>   | 21 |
| 24 | 2090.38        | 1045.70        | 2073.35        | 1037.18         | 2072.37        | 1036.69         | G    | 1721.84        | <b>861.43</b>  | 1704.81        | 852.91          | 1703.83        | 852.42          | 20 |
| 25 | 2161.46        | <b>1081.23</b> | 2144.43        | <b>1072.72</b>  | 2143.45        | <b>1072.23</b>  | A    | 1664.79        | 832.90         | 1647.76        | 824.38          | 1646.78        | 823.89          | 19 |
| 26 | <b>2232.54</b> | <b>1116.77</b> | 2215.51        | 1108.26         | 2214.52        | 1107.77         | A    | 1593.71        | 797.36         | 1576.68        | 788.85          | 1575.70        | 788.35          | 18 |
| 27 | 2329.65        | 1165.33        | 2312.62        | 1156.82         | 2311.64        | 1156.32         | P    | <b>1522.64</b> | <b>761.82</b>  | 1505.61        | 753.31          | 1504.62        | 752.81          | 17 |
| 28 | 2400.73        | 1200.87        | 2383.70        | 1192.35         | 2382.72        | 1191.86         | A    | 1425.52        | 713.26         | 1408.49        | 704.75          | 1407.51        | 704.26          | 16 |
| 29 | 2457.78        | 1229.40        | 2440.75        | 1220.88         | 2439.77        | 1220.39         | G    | <b>1354.44</b> | 677.73         | <b>1337.41</b> | 669.21          | <b>1336.43</b> | 668.72          | 15 |
| 30 | 2514.83        | <b>1257.92</b> | 2497.80        | 1249.41         | 2496.82        | 1248.91         | G    | 1297.39        | <b>649.20</b>  | <b>1280.36</b> | 640.68          | <b>1279.38</b> | 640.19          | 14 |
| 31 | 2611.95        | 1306.48        | 2594.92        | 1297.96         | 2593.95        | 1297.47         | P    | <b>1240.34</b> | <b>620.67</b>  | 1223.31        | 612.16          | 1222.32        | 611.67          | 13 |
| 32 | 2683.03        | <b>1342.02</b> | 2666.00        | 1333.50         | 2665.01        | 1333.01         | A    | 1143.22        | <b>572.12</b>  | 1126.19        | 563.60          | 1125.21        | 563.11          | 12 |
| 33 | 2780.14        | <b>1390.58</b> | 2763.11        | <b>1382.06</b>  | 2762.13        | <b>1381.57</b>  | P    | <b>1072.15</b> | <b>536.58</b>  | 1055.12        | 528.06          | 1054.13        | 527.57          | 11 |
| 34 | 2867.22        | 1434.11        | 2850.19        | 1425.60         | 2849.20        | 1425.11         | S    | 975.03         | 488.02         | 958.00         | 479.50          | 957.02         | 479.01          | 10 |
| 35 | 2968.32        | 1484.87        | 2951.29        | 1476.15         | 2950.31        | 1475.66         | T    | <b>887.95</b>  | 444.48         | 870.92         | 435.97          | 869.94         | 435.47          | 9  |
| 36 | 3039.40        | <b>1520.20</b> | 3022.37        | <b>1511.69</b>  | 3021.39        | <b>1511.20</b>  | A    | <b>786.85</b>  | 393.95         | 769.82         | 385.41          | 768.84         | 384.92          | 8  |
| 37 | 3110.48        | 1555.74        | 3093.45        | 1547.23         | 3092.46        | 1546.74         | A    | <b>715.77</b>  | 358.39         | 698.74         | 349.87          | <b>697.76</b>  | 349.38          | 7  |
| 38 | 3181.56        | 1591.28        | 3164.33        | 1582.77         | 3163.34        | 1582.28         | A    | <b>644.69</b>  | 322.85         | 627.66         | 314.34          | 626.68         | 313.84          | 6  |
| 39 | 3278.67        | 1639.84        | 3261.64        | 1631.33         | 3260.66        | 1630.83         | P    | <b>573.62</b>  | 287.31         | 556.59         | 278.80          | 555.60         | 278.30          | 5  |
| 40 | 3349.75        | 1675.38        | 3332.72        | 1666.86         | 3331.74        | 1666.37         | A    | 476.50         | 238.75         | 459.47         | 230.24          | 458.49         | 229.75          | 4  |
| 41 | 3478.86        | 1739.94        | 3461.83        | 1731.42         | 3460.85        | 1730.93         | E    | 405.42         | 203.22         | 388.39         | 194.70          | 387.41         | 194.21          | 3  |
| 42 | 3607.98        | 1804.49        | 3590.95        | <b>1795.98</b>  | 3589.96        | <b>1795.49</b>  | E    | 276.31         | 138.66         | 259.28         | 130.14          | 258.29         | 129.65          | 2  |
| 43 |                |                |                |                 |                |                 | K    | 147.20         | 74.10          | 130.17         | 65.59           |                |                 | 1  |

Gene Symbol  
RPS2

Sequences  
KLLMMAGIDD**C**YTSAR

m/z  
894.63

Charge  
2+

Ion score  
86.6

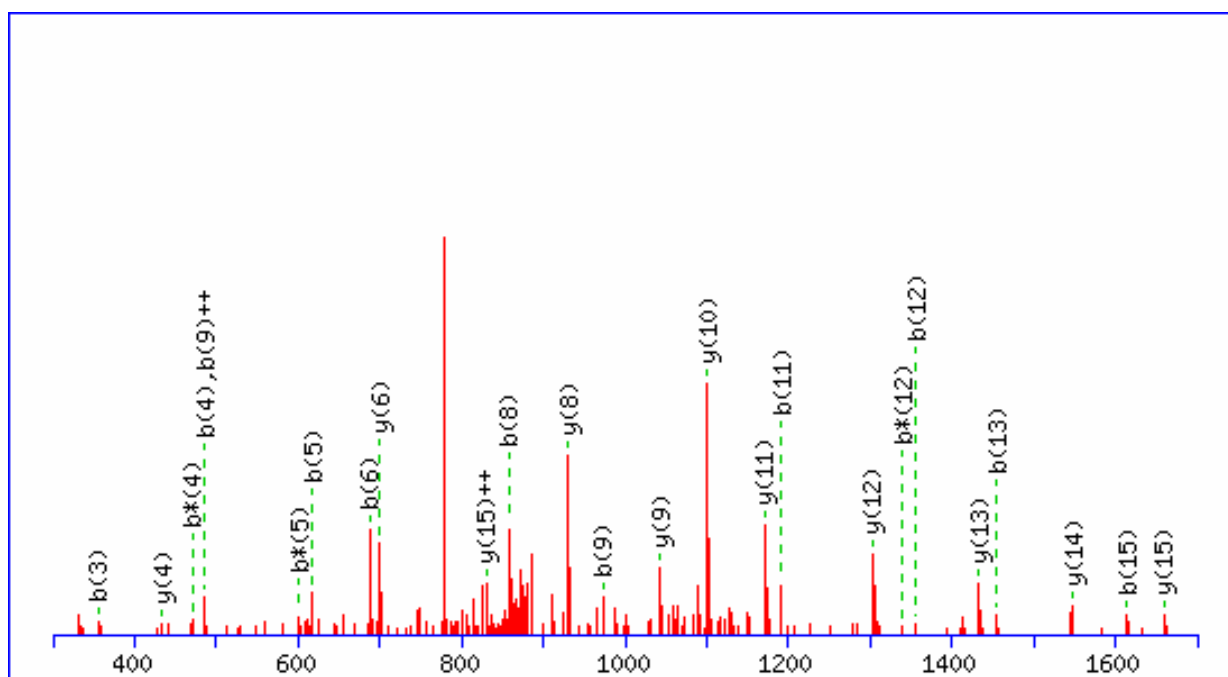

| #  | b       | b <sup>++</sup> | b <sup>*</sup> | b <sup>+++</sup> | b <sup>0</sup> | b <sup>0++</sup> | Seq. | y       | y <sup>++</sup> | y <sup>*</sup> | y <sup>+++</sup> | y <sup>0</sup> | y <sup>0++</sup> | #  |
|----|---------|-----------------|----------------|------------------|----------------|------------------|------|---------|-----------------|----------------|------------------|----------------|------------------|----|
| 1  | 129.18  | 65.09           | 112.15         | 56.58            |                |                  | K    |         |                 |                |                  |                |                  | 16 |
| 2  | 242.34  | 121.67          | 225.31         | 113.16           |                |                  | L    | 1660.95 | 830.98          | 1643.92        | 822.47           | 1642.94        | 821.97           | 15 |
| 3  | 355.50  | 178.25          | 338.46         | 169.74           |                |                  | L    | 1547.80 | 774.40          | 1530.77        | 765.89           | 1529.78        | 765.39           | 14 |
| 4  | 486.69  | 243.85          | 469.66         | 235.33           |                |                  | M    | 1434.64 | 717.82          | 1417.61        | 709.31           | 1416.62        | 708.82           | 13 |
| 5  | 617.89  | 309.45          | 600.86         | 300.93           |                |                  | M    | 1303.44 | 652.22          | 1286.41        | 643.71           | 1285.43        | 643.22           | 12 |
| 6  | 688.97  | 344.99          | 671.94         | 336.47           |                |                  | A    | 1172.25 | 586.63          | 1155.22        | 578.11           | 1154.23        | 577.62           | 11 |
| 7  | 746.02  | 373.51          | 728.99         | 365.00           |                |                  | G    | 1101.17 | 551.09          | 1084.14        | 542.57           | 1083.15        | 542.08           | 10 |
| 8  | 859.17  | 430.09          | 842.14         | 421.58           |                |                  | I    | 1044.12 | 522.56          | 1027.09        | 514.05           | 1026.10        | 513.55           | 9  |
| 9  | 974.26  | 487.63          | 957.23         | 479.12           | 956.25         | 478.63           | D    | 930.96  | 465.98          | 913.93         | 457.47           | 912.94         | 456.98           | 8  |
| 10 | 1089.35 | 545.18          | 1072.32        | 536.66           | 1071.33        | 536.17           | D    | 815.87  | 408.44          | 798.84         | 399.92           | 797.86         | 399.43           | 7  |
| 11 | 1192.49 | 596.75          | 1175.46        | 588.23           | 1174.48        | 587.74           | C    | 700.78  | 350.90          | 683.75         | 342.38           | 682.77         | 341.89           | 6  |
| 12 | 1355.67 | 678.34          | 1338.63        | 669.82           | 1337.65        | 669.33           | Y    | 597.64  | 299.32          | 580.61         | 290.81           | 579.63         | 290.32           | 5  |
| 13 | 1456.77 | 728.89          | 1439.74        | 720.37           | 1438.75        | 719.88           | T    | 434.47  | 217.74          | 417.44         | 209.22           | 416.45         | 208.73           | 4  |
| 14 | 1543.85 | 772.43          | 1526.82        | 763.91           | 1525.83        | 763.42           | S    | 333.36  | 167.19          | 316.33         | 158.67           | 315.35         | 158.18           | 3  |
| 15 | 1614.92 | 807.97          | 1597.89        | 799.45           | 1596.91        | 798.96           | A    | 246.29  | 123.65          | 229.26         | 115.13           |                |                  | 2  |
| 16 |         |                 |                |                  |                |                  | R    | 175.21  | 88.11           | 158.18         | 79.59            |                |                  | 1  |



Gene Symbol RTN3 Sequences AEPsAATQSHSISSSSFGAEPsAPGGGGSPGA**C**PALG**T**K m/z 1186.10 Charge 3+ Ion score 111.9

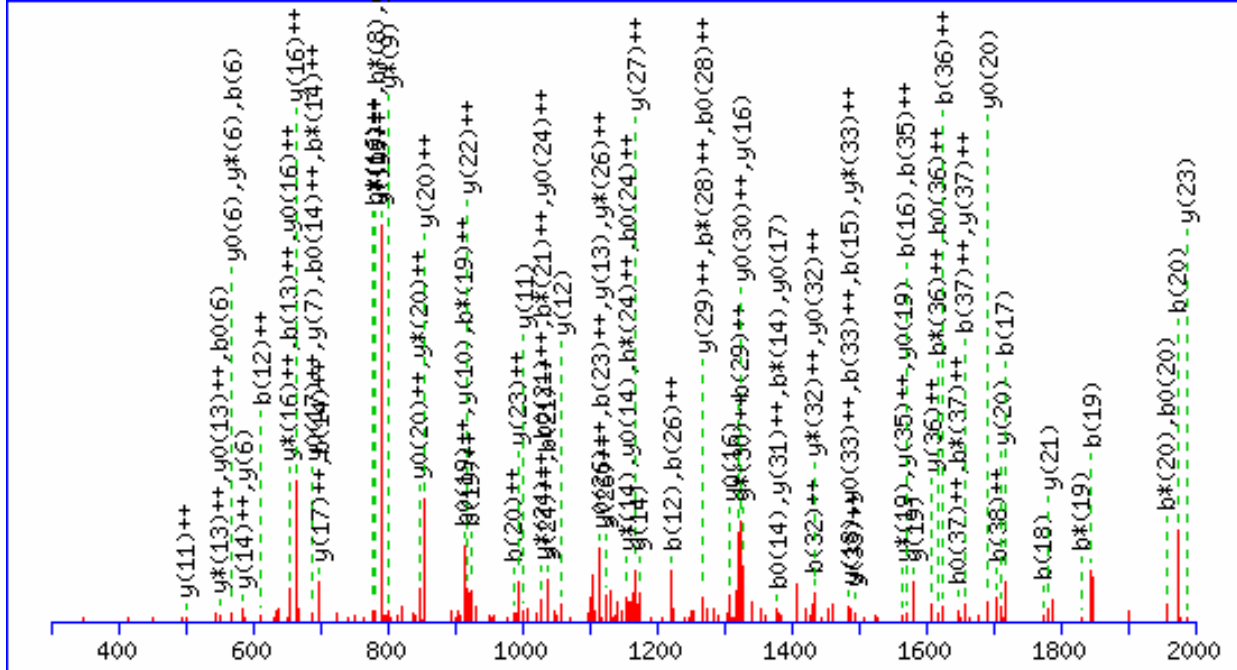

N-term : N-Acetyl (Protein)

| #  | b              | b <sup>++</sup> | b <sup>+</sup> | b <sup>+++</sup> | b <sup>0</sup> | b <sup>0++</sup> | Seq. | y              | y <sup>++</sup> | y <sup>+</sup> | y <sup>+++</sup> | y <sup>0</sup> | y <sup>0++</sup> | #  |
|----|----------------|-----------------|----------------|------------------|----------------|------------------|------|----------------|-----------------|----------------|------------------|----------------|------------------|----|
| 1  | 114.12         | 57.57           |                |                  |                |                  | A    |                |                 |                |                  |                |                  | 39 |
| 2  | 243.24         | 122.12          |                |                  | 225.22         | 113.11           | E    | 3444.63        | 1722.82         | 3427.60        | 1714.30          | 3426.61        | 1713.81          | 38 |
| 3  | 340.35         | 170.68          |                |                  | 322.34         | 161.67           | P    | 3315.52        | <b>1658.26</b>  | 3298.49        | 1649.75          | 3297.50        | 1649.25          | 37 |
| 4  | 427.43         | 214.22          |                |                  | 409.41         | 205.21           | S    | 3218.40        | <b>1609.70</b>  | 3201.37        | 1601.19          | 3200.39        | 1600.70          | 36 |
| 5  | 498.51         | 249.76          |                |                  | 480.49         | 240.75           | A    | 3131.32        | <b>1566.17</b>  | 3114.29        | 1557.65          | 3113.31        | 1557.16          | 35 |
| 6  | <b>569.58</b>  | 285.30          |                |                  | <b>551.57</b>  | 276.29           | A    | 3060.25        | 1530.63         | 3043.22        | 1522.11          | 3042.23        | 1521.62          | 34 |
| 7  | 670.69         | 335.85          |                |                  | 652.67         | 326.84           | T    | 2989.17        | <b>1495.09</b>  | 2972.14        | <b>1486.57</b>   | 2971.15        | <b>1486.08</b>   | 33 |
| 8  | 798.82         | 399.91          | <b>781.79</b>  | 391.40           | 780.80         | 390.91           | Q    | 2888.06        | 1444.54         | 2871.03        | <b>1436.02</b>   | 2870.05        | <b>1435.53</b>   | 32 |
| 9  | 885.90         | 443.45          | 868.86         | 434.94           | 867.88         | 434.44           | S    | 2759.93        | <b>1380.47</b>  | 2742.90        | 1371.96          | 2741.92        | 1371.46          | 31 |
| 10 | 1023.03        | 512.02          | 1006.00        | 503.51           | 1005.02        | 503.01           | H    | 2672.86        | 1336.93         | 2655.83        | <b>1328.42</b>   | 2654.84        | <b>1327.92</b>   | 30 |
| 11 | 1110.11        | 555.56          | 1093.08        | 547.04           | 1092.10        | 546.55           | S    | 2535.72        | <b>1268.36</b>  | 2518.69        | 1259.85          | 2517.70        | 1259.36          | 29 |
| 12 | <b>1223.27</b> | <b>612.14</b>   | 1206.24        | 603.62           | 1205.25        | 603.13           | I    | 2448.64        | 1224.82         | 2431.61        | 1216.31          | 2430.63        | 1215.82          | 28 |
| 13 | 1310.35        | <b>655.68</b>   | 1293.32        | 647.16           | 1292.33        | 646.67           | S    | 2335.48        | <b>1168.25</b>  | 2318.45        | 1159.73          | 2317.47        | 1159.24          | 27 |
| 14 | 1397.42        | <b>699.22</b>   | <b>1380.39</b> | <b>690.70</b>    | <b>1379.41</b> | <b>690.21</b>    | S    | 2248.41        | <b>1124.71</b>  | 2231.38        | <b>1116.19</b>   | 2230.39        | <b>1115.70</b>   | 26 |
| 15 | <b>1484.50</b> | 742.75          | 1467.47        | 734.24           | 1466.49        | 733.75           | S    | 2161.33        | 1081.17         | 2144.30        | 1072.65          | 2143.31        | 1072.16          | 25 |
| 16 | <b>1571.68</b> | 786.29          | 1554.55        | <b>777.78</b>    | 1553.56        | 777.29           | S    | 2074.25        | <b>1037.63</b>  | 2057.22        | <b>1029.11</b>   | 2056.24        | <b>1028.62</b>   | 24 |
| 17 | <b>1718.75</b> | 859.88          | 1701.72        | 851.36           | 1700.74        | 850.87           | F    | <b>1987.17</b> | <b>994.09</b>   | 1970.14        | 985.58           | 1969.16        | 985.08           | 23 |
| 18 | <b>1775.80</b> | 888.41          | 1758.77        | 879.89           | 1757.79        | 879.40           | G    | 1840.00        | <b>920.50</b>   | 1822.97        | 911.99           | 1821.98        | 911.50           | 22 |
| 19 | <b>1846.88</b> | <b>923.94</b>   | <b>1829.85</b> | <b>915.43</b>    | 1828.87        | <b>914.94</b>    | A    | <b>1782.95</b> | 891.98          | 1765.92        | 883.46           | 1764.93        | 882.97           | 21 |
| 20 | <b>1976.00</b> | <b>988.50</b>   | <b>1958.97</b> | 979.99           | <b>1957.98</b> | 979.49           | E    | <b>1711.87</b> | <b>856.44</b>   | 1694.84        | <b>847.92</b>    | <b>1693.86</b> | <b>847.43</b>    | 20 |
| 21 | 2073.11        | <b>1037.06</b>  | 2056.08        | <b>1028.54</b>   | 2055.10        | <b>1028.05</b>   | P    | <b>1582.76</b> | <b>791.88</b>   | <b>1565.73</b> | <b>783.37</b>    | <b>1564.74</b> | <b>782.87</b>    | 19 |
| 22 | 2160.19        | 1080.60         | 2143.16        | 1072.08          | 2142.17        | 1071.59          | S    | <b>1485.64</b> | 743.32          | 1468.61        | 734.81           | 1467.63        | 734.32           | 18 |
| 23 | 2231.27        | <b>1116.14</b>  | 2214.24        | 1107.62          | 2213.25        | 1107.13          | A    | 1398.56        | <b>699.79</b>   | 1381.53        | 691.27           | <b>1380.55</b> | <b>690.78</b>    | 17 |
| 24 | 2328.38        | 1164.69         | 2311.35        | <b>1156.18</b>   | 2310.37        | <b>1155.69</b>   | P    | <b>1327.49</b> | <b>664.25</b>   | 1310.46        | <b>655.73</b>    | <b>1309.47</b> | <b>655.24</b>    | 16 |
| 25 | 2385.43        | 1193.22         | 2368.40        | 1184.71          | 2367.42        | 1184.21          | G    | 1230.37        | 615.69          | 1213.34        | 607.17           | 1212.36        | 606.68           | 15 |
| 26 | 2442.48        | <b>1221.75</b>  | 2425.45        | 1213.23          | 2424.47        | 1212.74          | G    | <b>1173.32</b> | <b>587.16</b>   | <b>1156.29</b> | 578.65           | <b>1155.30</b> | 578.16           | 14 |
| 27 | 2499.54        | 1250.27         | 2482.50        | 1241.76          | 2481.52        | 1241.26          | G    | <b>1116.27</b> | 558.64          | 1099.24        | <b>550.12</b>    | 1098.25        | <b>549.63</b>    | 13 |
| 28 | 2556.59        | 1278.80         | 2539.56        | <b>1270.28</b>   | 2538.57        | <b>1269.79</b>   | G    | <b>1059.22</b> | 530.11          | 1042.19        | 521.60           | 1041.20        | 521.10           | 12 |
| 29 | 2643.66        | <b>1322.34</b>  | 2626.63        | 1313.82          | 2625.65        | 1313.33          | S    | <b>1002.17</b> | <b>501.59</b>   | 985.14         | 493.07           | 984.15         | 492.58           | 11 |
| 30 | 2740.78        | 1370.89         | 2723.75        | 1362.38          | 2722.76        | 1361.89          | P    | <b>915.09</b>  | 458.05          | 898.06         | 449.53           | 897.07         | 449.04           | 10 |
| 31 | 2797.83        | 1399.42         | 2780.80        | 1390.90          | 2779.82        | 1390.41          | G    | 817.97         | 409.49          | <b>800.94</b>  | 400.98           | 799.96         | 400.48           | 9  |
| 32 | 2868.91        | <b>1434.96</b>  | 2851.88        | 1426.44          | 2850.89        | 1425.95          | A    | 760.92         | 380.97          | 743.89         | 372.45           | 742.91         | 371.96           | 8  |
| 33 | 2972.05        | <b>1486.53</b>  | 2955.02        | 1478.01          | 2954.04        | 1477.52          | C    | <b>689.84</b>  | 345.43          | 672.81         | 336.91           | 671.83         | 336.42           | 7  |
| 34 | 3069.17        | 1535.09         | 3052.14        | 1526.57          | 3051.15        | 1526.08          | P    | <b>586.70</b>  | 293.85          | <b>569.67</b>  | 285.34           | <b>568.69</b>  | 284.85           | 6  |
| 35 | 3140.24        | <b>1570.63</b>  | 3123.21        | 1562.11          | 3122.23        | 1561.62          | A    | 489.59         | 245.30          | 472.56         | 236.78           | 471.57         | 236.29           | 5  |
| 36 | 3253.40        | <b>1627.20</b>  | 3236.37        | <b>1618.69</b>   | 3235.39        | <b>1618.20</b>   | L    | 418.51         | 209.76          | 401.48         | 201.24           | 400.49         | 200.75           | 4  |
| 37 | 3310.45        | <b>1655.73</b>  | 3293.42        | <b>1647.22</b>   | 3292.44        | <b>1646.72</b>   | G    | 305.35         | 153.18          | 288.32         | 144.66           | 287.34         | 144.17           | 3  |
| 38 | 3411.56        | <b>1706.28</b>  | 3394.53        | 1697.77          | 3393.54        | 1697.27          | T    | 248.30         | 124.65          | 231.27         | 116.14           | 230.28         | 115.65           | 2  |
| 39 |                |                 |                |                  |                |                  | K    | 147.20         | 74.10           | 130.17         | 65.59            |                |                  | 1  |

Gene Symbol  
RUVBL2

Sequences  
FVQCPDGELQK

m/z  
632.55

Charge  
2+

Ion score  
60.2

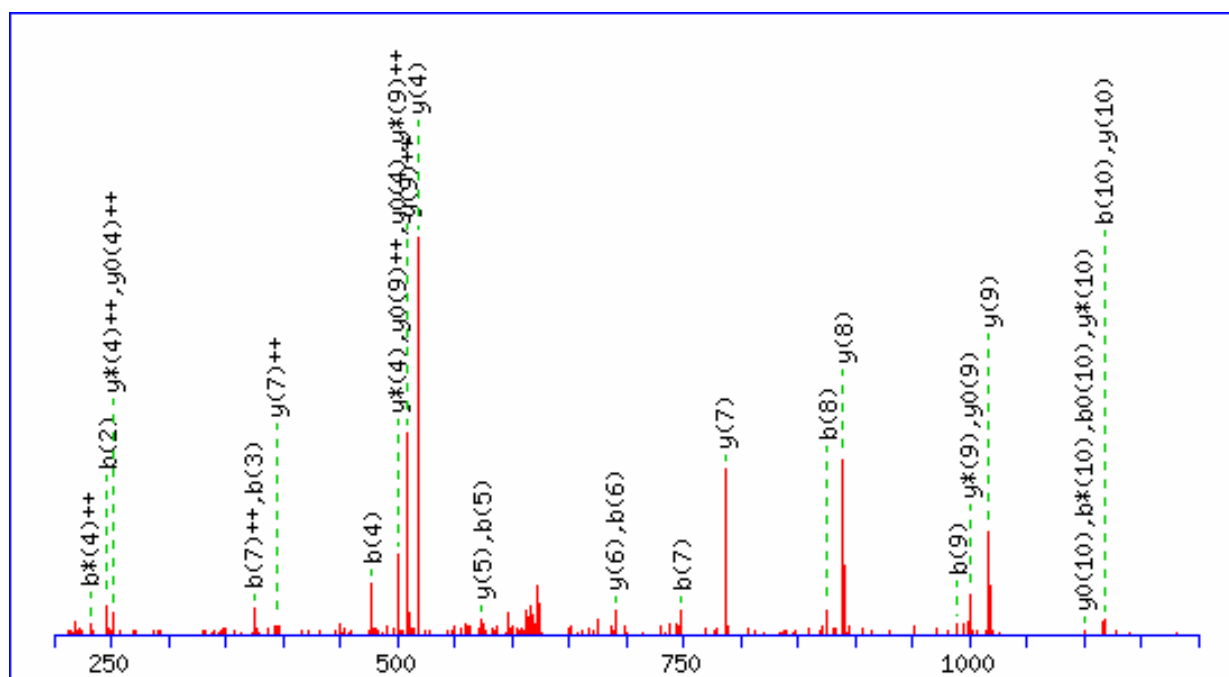

| #  | b       | b <sup>++</sup> | b <sup>*</sup> | b <sup>+++</sup> | b <sup>0</sup> | b <sup>0++</sup> | Seq. | y       | y <sup>++</sup> | y <sup>*</sup> | y <sup>+++</sup> | y <sup>0</sup> | y <sup>0++</sup> | #  |
|----|---------|-----------------|----------------|------------------|----------------|------------------|------|---------|-----------------|----------------|------------------|----------------|------------------|----|
| 1  | 148.18  | 74.59           |                |                  |                |                  | F    |         |                 |                |                  |                |                  | 11 |
| 2  | 247.31  | 124.16          |                |                  |                |                  | V    | 1117.25 | 559.13          | 1100.22        | 550.62           | 1099.24        | 550.12           | 10 |
| 3  | 375.44  | 188.23          | 358.41         | 179.71           |                |                  | Q    | 1018.12 | 509.57          | 1001.09        | 501.05           | 1000.11        | 500.56           | 9  |
| 4  | 478.59  | 239.80          | 461.55         | 231.28           |                |                  | C    | 889.99  | 445.50          | 872.96         | 436.99           | 871.98         | 436.49           | 8  |
| 5  | 575.70  | 288.35          | 558.67         | 279.84           |                |                  | P    | 786.85  | 393.93          | 769.82         | 385.41           | 768.83         | 384.92           | 7  |
| 6  | 690.79  | 345.90          | 673.76         | 337.38           | 672.77         | 336.89           | D    | 689.74  | 345.37          | 672.70         | 336.86           | 671.72         | 336.36           | 6  |
| 7  | 747.84  | 374.42          | 730.81         | 365.91           | 729.82         | 365.42           | G    | 574.65  | 287.83          | 557.62         | 279.31           | 556.63         | 278.82           | 5  |
| 8  | 876.95  | 438.98          | 859.92         | 430.47           | 858.94         | 429.97           | E    | 517.60  | 259.30          | 500.57         | 250.79           | 499.58         | 250.29           | 4  |
| 9  | 990.11  | 495.56          | 973.08         | 487.04           | 972.10         | 486.55           | L    | 388.48  | 194.75          | 371.45         | 186.23           |                |                  | 3  |
| 10 | 1118.24 | 559.62          | 1101.21        | 551.11           | 1100.22        | 550.62           | Q    | 275.32  | 138.17          | 258.29         | 129.65           |                |                  | 2  |
| 11 |         |                 |                |                  |                |                  | K    | 147.20  | 74.10           | 130.16         | 65.59            |                |                  | 1  |

Gene Symbol  
SCRIB

Sequences  
MLK**C**IPLWR

m/z  
601.51

Charge  
2+

Ion score  
64.4

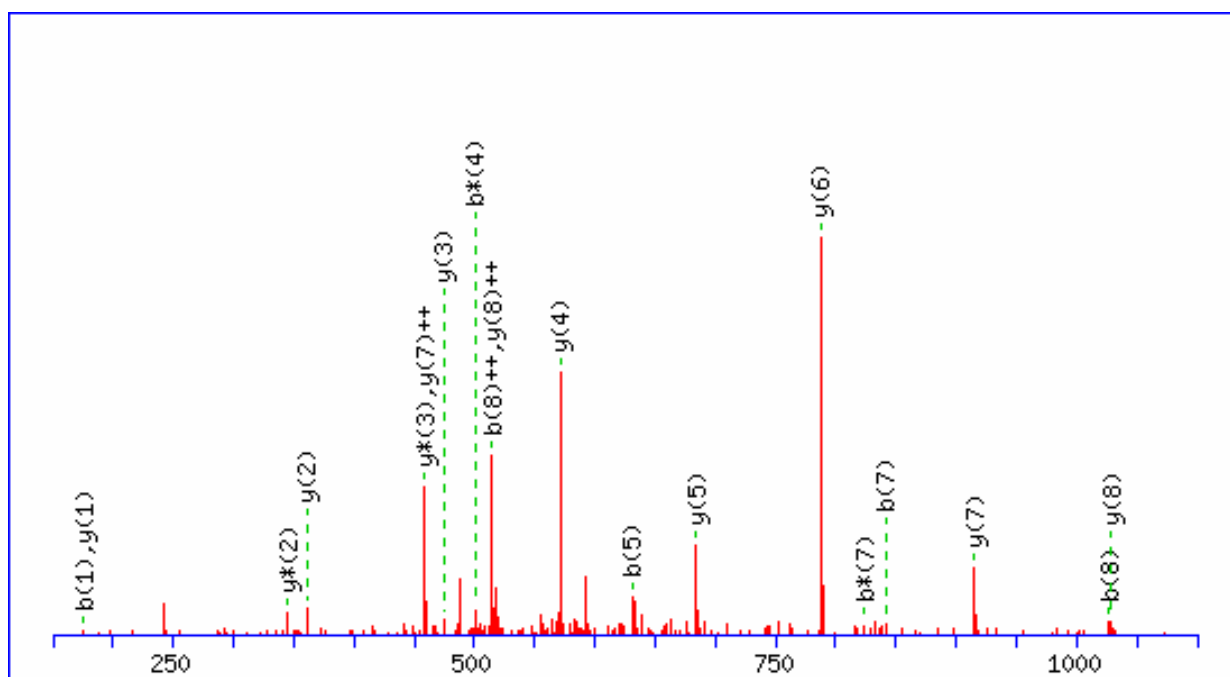

**N-term : N-Acetyl (Protein)**

| # | b       | b <sup>++</sup> | b <sup>*</sup> | b <sup>+++</sup> | Seq. | y       | y <sup>++</sup> | y <sup>*</sup> | y <sup>+++</sup> | # |
|---|---------|-----------------|----------------|------------------|------|---------|-----------------|----------------|------------------|---|
| 1 | 174.24  | 87.62           |                |                  | M    |         |                 |                |                  | 9 |
| 2 | 287.40  | 144.20          |                |                  | L    | 1029.32 | 515.16          | 1012.29        | 506.65           | 8 |
| 3 | 415.57  | 208.29          | 398.54         | 199.77           | K    | 916.16  | 458.59          | 899.13         | 450.07           | 7 |
| 4 | 518.71  | 259.86          | 501.68         | 251.35           | C    | 787.99  | 394.50          | 770.96         | 385.98           | 6 |
| 5 | 631.87  | 316.44          | 614.84         | 307.92           | I    | 684.85  | 342.93          | 667.82         | 334.41           | 5 |
| 6 | 728.99  | 365.00          | 711.96         | 356.48           | P    | 571.69  | 286.35          | 554.66         | 277.83           | 4 |
| 7 | 842.14  | 421.58          | 825.11         | 413.06           | L    | 474.58  | 237.79          | 457.55         | 229.28           | 3 |
| 8 | 1028.35 | 514.68          | 1011.32        | 506.17           | W    | 361.42  | 181.21          | 344.39         | 172.70           | 2 |
| 9 |         |                 |                |                  | R    | 175.21  | 88.11           | 158.18         | 79.59            | 1 |

Gene Symbol  
SFT2D3

Sequences  
SPAESAAAGLTCLPSVTR

m/z  
866.64

Charge  
2+

Ion score  
111.7

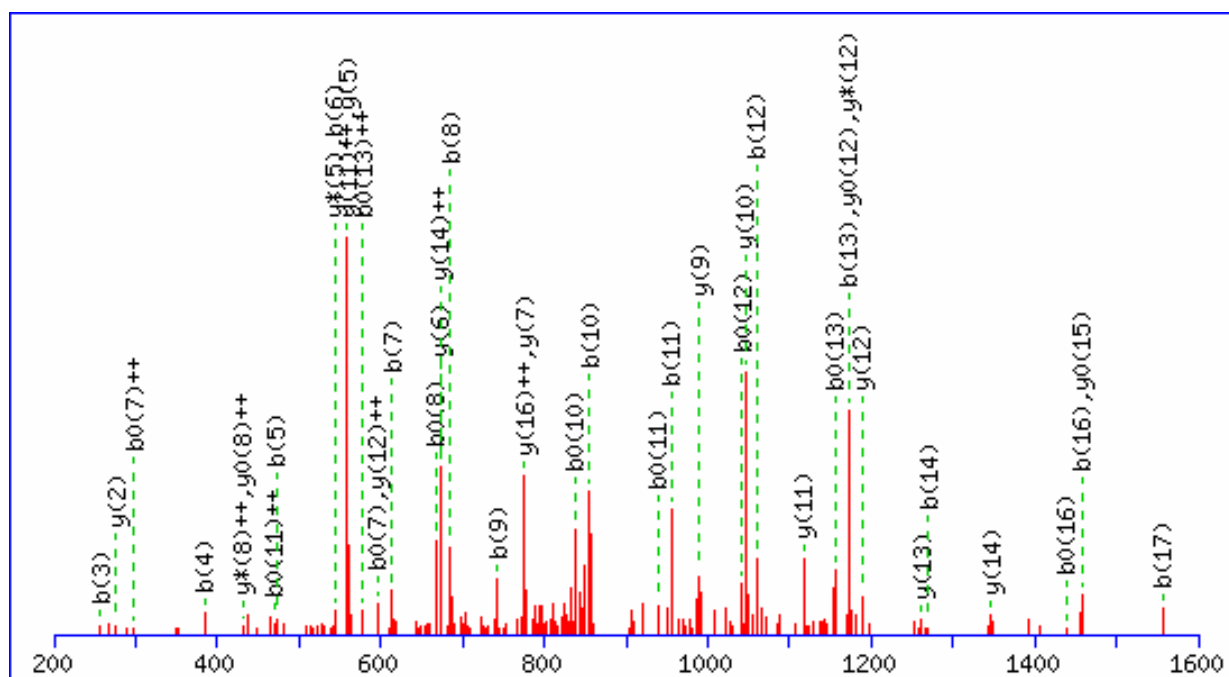

| #  | b              | b <sup>++</sup> | b <sup>0</sup> | b <sup>0++</sup> | Seq. | y              | y <sup>++</sup> | y <sup>*</sup> | y <sup>*++</sup> | y <sup>0</sup> | y <sup>0++</sup> | #  |
|----|----------------|-----------------|----------------|------------------|------|----------------|-----------------|----------------|------------------|----------------|------------------|----|
| 1  | 88.09          | 44.55           | 70.07          | 35.54            | S    |                |                 |                |                  |                |                  | 18 |
| 2  | 185.20         | 93.10           | 167.19         | 84.10            | P    | 1644.87        | 822.94          | 1627.84        | 814.42           | 1626.85        | 813.93           | 17 |
| 3  | <b>256.28</b>  | 128.64          | 238.26         | 119.64           | A    | 1547.75        | <b>774.38</b>   | 1530.72        | 765.87           | 1529.74        | 765.37           | 16 |
| 4  | <b>385.39</b>  | 193.20          | 367.38         | 184.19           | E    | 1476.67        | 738.84          | 1459.64        | 730.33           | <b>1458.66</b> | 729.83           | 15 |
| 5  | <b>472.47</b>  | 236.74          | 454.45         | 227.73           | S    | <b>1347.56</b> | <b>674.28</b>   | 1330.53        | 665.77           | 1329.55        | 665.28           | 14 |
| 6  | <b>543.55</b>  | 272.28          | 525.53         | 263.27           | A    | <b>1260.48</b> | 630.75          | 1243.45        | 622.23           | 1242.47        | 621.74           | 13 |
| 7  | <b>614.63</b>  | 307.82          | <b>596.61</b>  | <b>298.81</b>    | A    | <b>1189.41</b> | <b>595.21</b>   | <b>1172.37</b> | 586.69           | <b>1171.39</b> | 586.20           | 12 |
| 8  | <b>685.70</b>  | 343.36          | <b>667.69</b>  | 334.35           | A    | <b>1118.33</b> | <b>559.67</b>   | 1101.30        | 551.15           | 1100.31        | 550.66           | 11 |
| 9  | <b>742.75</b>  | 371.88          | 724.74         | 362.87           | G    | <b>1047.25</b> | 524.13          | 1030.22        | 515.61           | 1029.23        | 515.12           | 10 |
| 10 | <b>855.91</b>  | 428.46          | <b>837.90</b>  | 419.45           | L    | <b>990.20</b>  | 495.60          | 973.17         | 487.09           | 972.18         | 486.60           | 9  |
| 11 | <b>957.02</b>  | 479.01          | <b>939.00</b>  | <b>470.00</b>    | T    | 877.04         | 439.02          | 860.01         | <b>430.51</b>    | 859.03         | <b>430.02</b>    | 8  |
| 12 | <b>1060.16</b> | 530.58          | <b>1042.14</b> | 521.58           | C    | <b>775.94</b>  | 388.47          | 758.91         | 379.96           | 757.92         | 379.46           | 7  |
| 13 | <b>1173.32</b> | 587.16          | <b>1155.30</b> | <b>578.15</b>    | L    | <b>672.79</b>  | 336.90          | 655.76         | 328.39           | 654.78         | 327.89           | 6  |
| 14 | <b>1270.43</b> | 635.72          | 1252.42        | 626.71           | P    | <b>559.64</b>  | 280.32          | <b>542.61</b>  | 271.81           | 541.62         | 271.31           | 5  |
| 15 | 1357.51        | 679.26          | 1339.49        | 670.25           | S    | 462.52         | 231.76          | 445.49         | 223.25           | 444.51         | 222.76           | 4  |
| 16 | <b>1456.64</b> | 728.82          | <b>1438.62</b> | 719.82           | V    | 375.44         | 188.23          | 358.41         | 179.71           | 357.43         | 179.22           | 3  |
| 17 | <b>1557.74</b> | 779.38          | 1539.73        | 770.37           | T    | <b>276.31</b>  | 138.66          | 259.28         | 130.15           | 258.30         | 129.65           | 2  |
| 18 |                |                 |                |                  | R    | 175.21         | 88.11           | 158.18         | 79.59            |                |                  | 1  |

Gene Symbol  
SKIV2L2

Sequences  
VKVQSVETVEG**C**THEVALPAEEDYLPLKPR

m/z  
1113.51

Charge  
3+

Ion score  
109.1

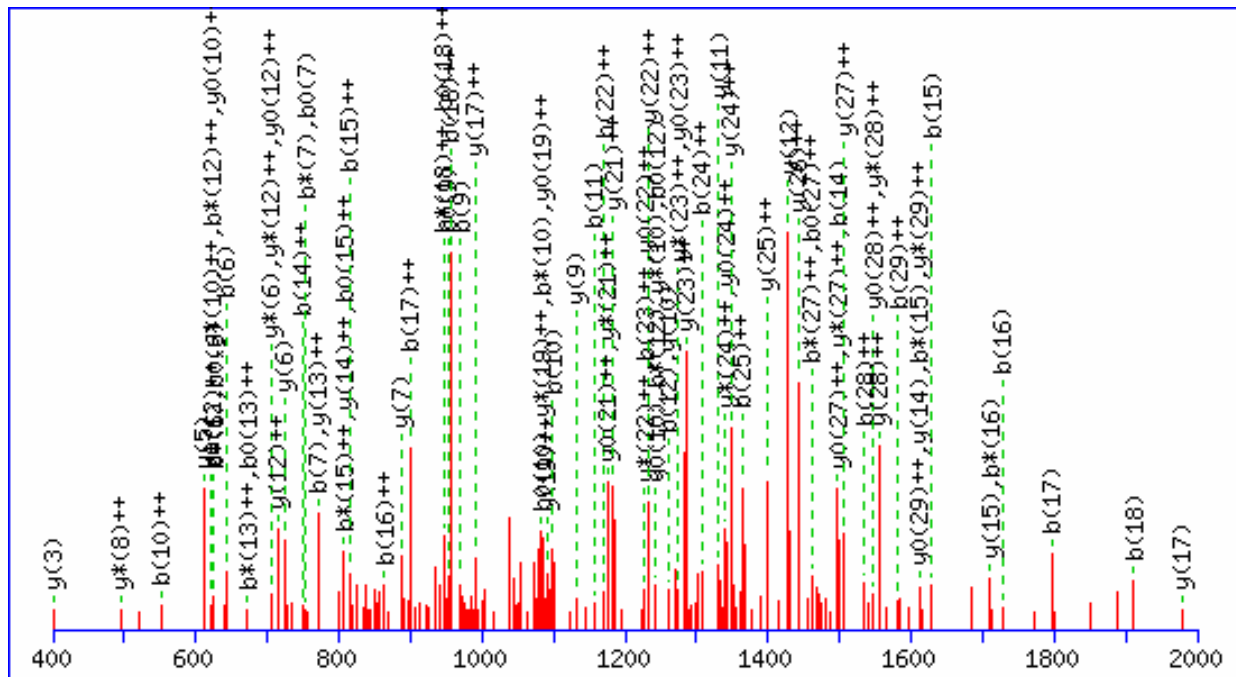

| #  | b              | b <sup>++</sup> | b <sup>+</sup> | b <sup>+++</sup> | b <sup>0</sup> | b <sup>0++</sup> | Seq. | y              | y <sup>++</sup> | y <sup>+</sup> | y <sup>+++</sup> | y <sup>0</sup> | y <sup>0++</sup> | #  |
|----|----------------|-----------------|----------------|------------------|----------------|------------------|------|----------------|-----------------|----------------|------------------|----------------|------------------|----|
| 1  | 100.14         | 50.57           |                |                  |                |                  | V    |                |                 |                |                  |                |                  | 30 |
| 2  | 228.31         | 114.66          | 211.28         | 106.14           |                |                  | K    | 3239.63        | 1620.32         | 3222.60        | <b>1611.80</b>   | 3221.62        | <b>1611.31</b>   | 29 |
| 3  | 327.44         | 164.23          | 310.41         | 155.71           |                |                  | V    | 3111.46        | <b>1556.23</b>  | 3094.43        | <b>1547.72</b>   | 3093.44        | <b>1547.23</b>   | 28 |
| 4  | 455.57         | 228.29          | 438.54         | 219.77           |                |                  | Q    | 3012.33        | <b>1506.67</b>  | 2995.30        | <b>1498.15</b>   | 2994.31        | <b>1497.66</b>   | 27 |
| 5  | 542.65         | 271.83          | 525.62         | 263.31           | 524.63         | 262.82           | S    | 2884.20        | <b>1442.60</b>  | 2867.17        | 1434.09          | 2866.18        | 1433.60          | 26 |
| 6  | <b>641.78</b>  | 321.39          | <b>624.75</b>  | 312.88           | <b>623.76</b>  | 312.39           | V    | 2797.12        | <b>1399.06</b>  | 2780.09        | 1390.55          | 2779.11        | 1390.06          | 25 |
| 7  | <b>770.89</b>  | 385.95          | <b>753.86</b>  | 377.44           | <b>752.88</b>  | 376.94           | E    | 2697.99        | <b>1349.50</b>  | 2680.96        | <b>1340.98</b>   | 2679.97        | <b>1340.49</b>   | 24 |
| 8  | 872.00         | 436.50          | 854.97         | 427.99           | 853.98         | 427.50           | T    | 2568.88        | <b>1284.94</b>  | 2551.85        | <b>1276.43</b>   | 2550.86        | <b>1275.93</b>   | 23 |
| 9  | <b>971.13</b>  | 486.07          | 954.10         | 477.55           | <b>953.11</b>  | 477.06           | V    | 2467.77        | <b>1234.39</b>  | 2450.74        | <b>1225.87</b>   | 2449.76        | <b>1225.38</b>   | 22 |
| 10 | <b>1100.24</b> | <b>550.63</b>   | <b>1083.21</b> | 542.11           | <b>1082.23</b> | 541.62           | E    | 2368.64        | <b>1184.82</b>  | 2351.61        | <b>1176.31</b>   | 2350.63        | <b>1175.82</b>   | 21 |
| 11 | <b>1157.29</b> | 579.15          | 1140.26        | 570.64           | 1139.28        | 570.14           | G    | 2239.53        | 1120.27         | 2222.50        | 1111.75          | 2221.51        | 1111.26          | 20 |
| 12 | <b>1260.44</b> | 630.72          | <b>1243.41</b> | <b>622.21</b>    | <b>1242.42</b> | <b>621.71</b>    | C    | 2182.48        | <b>1091.74</b>  | 2165.44        | <b>1083.23</b>   | 2164.46        | <b>1082.73</b>   | 19 |
| 13 | 1361.54        | 681.27          | 1344.51        | <b>672.76</b>    | 1343.53        | <b>672.27</b>    | T    | 2079.33        | 1040.17         | 2062.30        | 1031.65          | 2061.32        | 1031.16          | 18 |
| 14 | <b>1498.68</b> | <b>749.84</b>   | 1481.65        | 741.33           | 1480.67        | 740.84           | H    | <b>1978.23</b> | <b>989.62</b>   | 1961.20        | 981.10           | 1960.21        | 980.61           | 17 |
| 15 | <b>1627.79</b> | <b>814.40</b>   | <b>1610.76</b> | <b>805.89</b>    | 1609.78        | <b>805.39</b>    | E    | 1841.09        | 921.05          | 1824.06        | 912.53           | 1823.07        | 912.04           | 16 |
| 16 | <b>1726.93</b> | <b>863.97</b>   | <b>1709.90</b> | 855.45           | 1708.91        | 854.96           | V    | <b>1711.98</b> | 856.49          | 1694.94        | 847.98           | 1693.96        | 847.48           | 15 |
| 17 | <b>1798.00</b> | <b>899.51</b>   | 1780.97        | 890.99           | 1779.99        | 890.50           | A    | <b>1612.84</b> | <b>806.93</b>   | 1595.81        | 798.41           | 1594.83        | 797.92           | 14 |
| 18 | <b>1911.16</b> | <b>956.08</b>   | 1894.13        | <b>947.57</b>    | 1893.15        | <b>947.08</b>    | L    | 1541.77        | <b>771.39</b>   | 1524.74        | 762.87           | 1523.75        | 762.38           | 13 |
| 19 | 2008.28        | 1004.64         | 1991.25        | 996.13           | 1990.26        | 995.63           | P    | <b>1428.61</b> | <b>714.81</b>   | 1411.58        | <b>706.29</b>    | 1410.59        | <b>705.80</b>    | 12 |
| 20 | 2079.35        | 1040.18         | 2062.32        | 1031.67          | 2061.34        | 1031.17          | A    | <b>1331.49</b> | 666.25          | 1314.46        | 657.74           | 1313.48        | 657.24           | 11 |
| 21 | 2208.47        | 1104.74         | 2191.44        | 1096.22          | 2190.45        | 1095.73          | E    | <b>1260.42</b> | 630.71          | <b>1243.39</b> | <b>622.20</b>    | <b>1242.40</b> | <b>621.70</b>    | 10 |
| 22 | 2337.58        | <b>1169.30</b>  | 2320.55        | 1160.78          | 2319.57        | 1160.29          | E    | <b>1131.30</b> | 566.15          | 1114.27        | 557.64           | 1113.29        | 557.15           | 9  |
| 23 | 2452.67        | <b>1226.84</b>  | 2435.64        | 1218.32          | 2434.65        | 1217.83          | D    | 1002.19        | 501.60          | 985.16         | <b>493.08</b>    | 984.17         | 492.59           | 8  |
| 24 | 2615.84        | <b>1308.43</b>  | 2598.81        | 1299.91          | 2597.83        | 1299.42          | Y    | <b>887.10</b>  | 444.05          | 870.07         | 435.54           |                |                  | 7  |
| 25 | 2729.00        | <b>1365.00</b>  | 2711.97        | 1356.49          | 2710.99        | 1356.00          | L    | <b>723.93</b>  | 362.47          | <b>706.90</b>  | 353.95           |                |                  | 6  |
| 26 | 2826.12        | 1413.56         | 2809.09        | 1405.05          | 2808.10        | 1404.55          | P    | <b>610.77</b>  | 305.89          | 593.74         | 297.37           |                |                  | 5  |
| 27 | 2939.27        | 1470.14         | 2922.24        | <b>1461.63</b>   | 2921.26        | <b>1461.13</b>   | L    | 513.65         | 257.33          | 496.62         | 248.82           |                |                  | 4  |
| 28 | 3067.45        | <b>1534.23</b>  | 3050.42        | 1525.71          | 3049.43        | 1525.22          | K    | <b>400.50</b>  | 200.75          | 383.47         | 192.24           |                |                  | 3  |
| 29 | 3164.56        | <b>1582.78</b>  | 3147.53        | 1574.27          | 3146.55        | 1573.78          | P    | 272.32         | 136.67          | 255.29         | 128.15           |                |                  | 2  |
| 30 |                |                 |                |                  |                |                  | R    | 175.21         | 88.11           | 158.18         | 79.59            |                |                  | 1  |

Gene Symbol SLC1A5 Sequences GLAAAEPTANGGLALASIEDQGAAAGGY**CGSRDQVR** m/z 1140.28 Charge 3+ Ion score 176.5

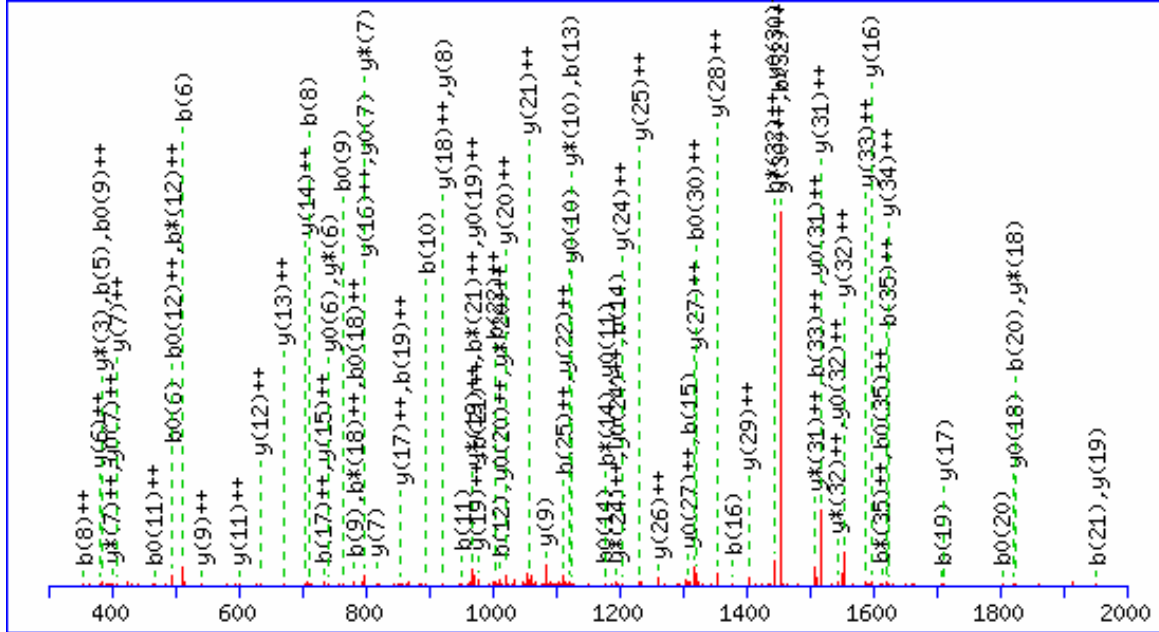

| #  | b              | b <sup>+</sup> | b <sup>+</sup> | b <sup>++</sup> | b <sup>0</sup> | b <sup>0+</sup> | Seq. | y              | y <sup>+</sup> | y <sup>+</sup> | y <sup>++</sup> | y <sup>0</sup> | y <sup>0+</sup> | #  |
|----|----------------|----------------|----------------|-----------------|----------------|-----------------|------|----------------|----------------|----------------|-----------------|----------------|-----------------|----|
| 1  | 58.06          | 29.53          |                |                 |                |                 | G    |                |                |                |                 |                |                 | 36 |
| 2  | 171.22         | 86.11          |                |                 |                |                 | L    | 3362.62        | 1681.81        | 3345.59        | 1673.30         | 3344.60        | 1672.81         | 35 |
| 3  | 242.29         | 121.65         |                |                 |                |                 | A    | 3249.46        | <b>1625.23</b> | 3232.43        | 1616.72         | 3231.45        | 1616.23         | 34 |
| 4  | 313.37         | 157.19         |                |                 |                |                 | A    | 3178.38        | <b>1589.70</b> | 3161.35        | 1581.18         | 3160.37        | 1580.69         | 33 |
| 5  | <b>384.45</b>  | 192.73         |                |                 |                |                 | A    | 3107.31        | <b>1554.16</b> | 3090.27        | <b>1545.64</b>  | 3089.29        | <b>1545.15</b>  | 32 |
| 6  | <b>513.56</b>  | 257.29         |                |                 | <b>495.55</b>  | 248.28          | E    | 3036.23        | <b>1518.62</b> | 3019.20        | <b>1510.10</b>  | 3018.21        | <b>1509.61</b>  | 31 |
| 7  | 610.68         | 305.84         |                |                 | 592.66         | 296.84          | P    | 2907.11        | <b>1454.06</b> | 2890.08        | <b>1445.55</b>  | 2889.10        | <b>1445.05</b>  | 30 |
| 8  | <b>711.78</b>  | <b>356.40</b>  |                |                 | 693.77         | 347.39          | T    | 2810.00        | <b>1405.50</b> | 2792.97        | 1396.99         | 2791.98        | 1396.50         | 29 |
| 9  | <b>782.86</b>  | 391.93         |                |                 | <b>764.85</b>  | <b>382.93</b>   | A    | 2708.89        | <b>1354.95</b> | 2691.86        | 1346.44         | 2690.88        | 1345.94         | 28 |
| 10 | <b>896.96</b>  | 448.99         | 879.93         | 440.47          | 878.95         | 439.98          | N    | 2637.82        | <b>1319.41</b> | 2620.79        | 1310.90         | 2619.80        | <b>1310.40</b>  | 27 |
| 11 | <b>954.02</b>  | 477.51         | 936.98         | 469.00          | 936.00         | <b>468.50</b>   | G    | 2523.71        | <b>1262.36</b> | 2506.68        | 1253.85         | 2505.70        | 1253.35         | 26 |
| 12 | <b>1011.07</b> | 506.04         | 994.04         | <b>497.52</b>   | 993.05         | <b>497.03</b>   | G    | 2466.66        | <b>1233.84</b> | 2449.63        | 1225.32         | 2448.65        | 1224.83         | 25 |
| 13 | <b>1124.22</b> | 562.62         | 1107.19        | 554.10          | 1106.21        | 553.61          | L    | 2409.61        | <b>1205.31</b> | 2392.58        | <b>1196.79</b>  | 2391.60        | <b>1196.30</b>  | 24 |
| 14 | <b>1195.30</b> | 598.16         | <b>1178.27</b> | 589.64          | <b>1177.29</b> | 589.15          | A    | 2296.45        | 1148.73        | 2279.42        | 1140.22         | 2278.44        | 1139.72         | 23 |
| 15 | <b>1308.46</b> | 654.73         | 1291.43        | 646.22          | 1290.44        | 645.73          | L    | 2225.38        | <b>1113.19</b> | 2208.35        | 1104.68         | 2207.36        | 1104.18         | 22 |
| 16 | <b>1379.54</b> | 690.27         | 1362.51        | 681.76          | 1361.52        | 681.27          | A    | 2112.22        | <b>1056.61</b> | 2095.19        | 1048.10         | 2094.20        | 1047.61         | 21 |
| 17 | 1466.62        | <b>733.81</b>  | 1449.58        | 725.30          | 1448.60        | 724.80          | S    | 2041.14        | <b>1021.07</b> | 2024.11        | <b>1012.56</b>  | 2023.12        | <b>1012.07</b>  | 20 |
| 18 | 1579.77        | 790.39         | 1562.74        | <b>781.88</b>   | 1561.76        | <b>781.38</b>   | I    | <b>1954.06</b> | <b>977.54</b>  | 1937.03        | <b>969.02</b>   | 1936.05        | <b>968.53</b>   | 19 |
| 19 | <b>1708.89</b> | <b>854.95</b>  | 1691.86        | 846.43          | 1690.87        | 845.94          | E    | 1840.91        | <b>920.96</b>  | <b>1823.87</b> | 912.44          | <b>1822.89</b> | 911.95          | 18 |
| 20 | <b>1823.97</b> | 912.49         | 1806.94        | 903.98          | <b>1805.96</b> | 903.48          | D    | <b>1711.79</b> | <b>856.40</b>  | 1694.76        | 847.88          | 1693.78        | 847.39          | 17 |
| 21 | <b>1952.10</b> | <b>976.56</b>  | 1935.07        | <b>968.04</b>   | 1934.09        | 967.55          | Q    | <b>1596.70</b> | <b>798.86</b>  | 1579.67        | 790.34          | 1578.69        | 789.85          | 16 |
| 22 | 2009.15        | <b>1005.08</b> | 1992.12        | 996.57          | 1991.14        | 996.07          | G    | 1468.57        | <b>734.79</b>  | 1451.54        | 726.28          | 1450.56        | 725.78          | 15 |
| 23 | 2080.23        | 1040.62        | 2063.20        | 1032.10         | 2062.22        | 1031.61         | A    | 1411.52        | <b>706.27</b>  | 1394.49        | 697.75          | 1393.51        | 697.26          | 14 |
| 24 | 2151.31        | 1076.16        | 2134.28        | 1067.64         | 2133.30        | 1067.15         | A    | 1340.45        | <b>670.73</b>  | 1323.41        | 662.21          | 1322.43        | 661.72          | 13 |
| 25 | 2222.39        | <b>1111.70</b> | 2205.36        | 1103.18         | 2204.37        | 1102.69         | A    | 1269.37        | <b>635.19</b>  | 1252.34        | 626.67          | 1251.35        | 626.18          | 12 |
| 26 | 2279.44        | 1140.22        | 2262.41        | 1131.71         | 2261.42        | 1131.22         | G    | 1198.29        | <b>599.65</b>  | 1181.26        | 591.13          | <b>1180.27</b> | 590.64          | 11 |
| 27 | 2336.49        | 1168.75        | 2319.46        | 1160.23         | 2318.48        | 1159.74         | G    | 1141.24        | 571.12         | <b>1124.21</b> | 562.61          | <b>1123.22</b> | 562.12          | 10 |
| 28 | 2499.66        | 1250.34        | 2482.63        | 1241.82         | 2481.65        | 1241.33         | Y    | <b>1084.19</b> | <b>542.60</b>  | 1067.16        | 534.08          | 1066.17        | 533.59          | 9  |
| 29 | 2602.81        | 1301.91        | 2585.78        | 1293.39         | 2584.79        | 1292.90         | C    | <b>921.01</b>  | 461.01         | 903.98         | 452.50          | 903.00         | 452.00          | 8  |
| 30 | 2659.86        | 1330.43        | 2642.83        | 1321.92         | 2641.84        | <b>1321.43</b>  | G    | <b>817.87</b>  | <b>409.44</b>  | <b>800.84</b>  | <b>400.92</b>   | <b>799.86</b>  | <b>400.43</b>   | 7  |
| 31 | 2746.94        | 1373.97        | 2729.91        | 1365.46         | 2728.92        | 1364.96         | S    | 760.82         | <b>380.91</b>  | <b>743.79</b>  | 372.40          | <b>742.80</b>  | 371.91          | 6  |
| 32 | 2903.12        | <b>1452.06</b> | 2886.09        | <b>1443.55</b>  | 2885.11        | <b>1443.06</b>  | R    | 673.74         | 337.38         | 656.71         | 328.86          | 655.73         | 328.37          | 5  |
| 33 | 3018.21        | <b>1509.61</b> | 3001.18        | 1501.09         | 3000.19        | 1500.60         | D    | 517.56         | 259.28         | 500.53         | 250.77          | 499.54         | 250.27          | 4  |
| 34 | 3146.34        | 1573.67        | 3129.31        | 1565.16         | 3128.32        | 1564.67         | Q    | 402.47         | 201.74         | <b>385.44</b>  | 193.22          |                |                 | 3  |
| 35 | 3245.47        | <b>1623.24</b> | 3228.44        | <b>1614.72</b>  | 3227.45        | <b>1614.23</b>  | V    | 274.34         | 137.67         | 257.31         | 129.16          |                |                 | 2  |
| 36 |                |                |                |                 |                |                 | R    | 175.21         | 88.11          | 158.18         | 79.59           |                |                 | 1  |

Gene Symbol  
SLC26A11

Sequences  
SSGPGMAPSA**CCC**SPAALQR

m/z  
947.55

Charge  
2+

Ion score  
77.9

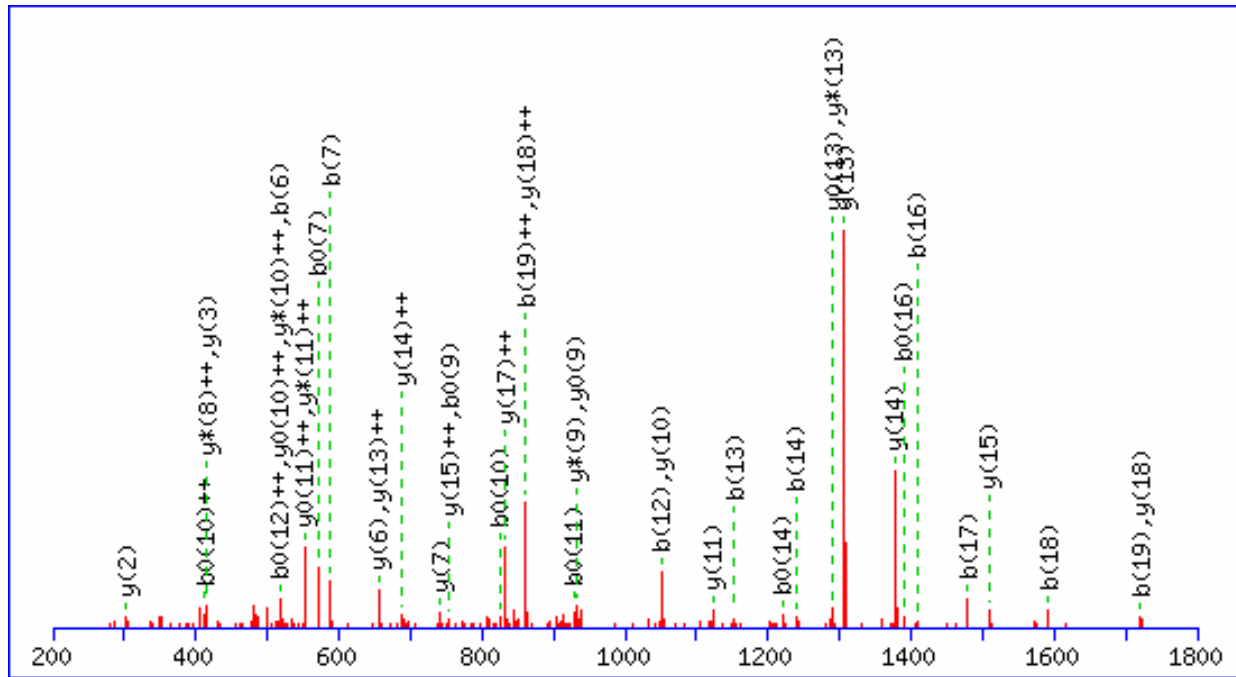

| #  | b              | b <sup>++</sup> | b <sup>*</sup> | b <sup>*++</sup> | b <sup>0</sup> | b <sup>0++</sup> | Seq. | y              | y <sup>++</sup> | y <sup>*</sup> | y <sup>*++</sup> | y <sup>0</sup> | y <sup>0++</sup> | #  |
|----|----------------|-----------------|----------------|------------------|----------------|------------------|------|----------------|-----------------|----------------|------------------|----------------|------------------|----|
| 1  | 88.09          | 44.55           |                |                  | 70.07          | 35.54            | S    |                |                 |                |                  |                |                  | 20 |
| 2  | 175.16         | 88.09           |                |                  | 157.15         | 79.08            | S    | 1808.11        | 904.56          | 1791.08        | 896.04           | 1790.10        | 895.55           | 19 |
| 3  | 232.21         | 116.61          |                |                  | 214.20         | 107.60           | G    | <b>1721.03</b> | <b>861.02</b>   | 1704.00        | 852.51           | 1703.02        | 852.01           | 18 |
| 4  | 329.33         | 165.17          |                |                  | 311.31         | 156.16           | P    | 1663.98        | <b>832.50</b>   | 1646.95        | 823.98           | 1645.97        | 823.49           | 17 |
| 5  | 386.38         | 193.69          |                |                  | 368.37         | 184.69           | G    | 1566.87        | 783.94          | 1549.84        | 775.42           | 1548.85        | 774.93           | 16 |
| 6  | <b>517.58</b>  | 259.29          |                |                  | 499.56         | 250.28           | M    | <b>1509.82</b> | <b>755.41</b>   | 1492.79        | 746.90           | 1491.80        | 746.40           | 15 |
| 7  | <b>588.65</b>  | 294.83          |                |                  | <b>570.64</b>  | 285.82           | A    | <b>1378.62</b> | <b>689.81</b>   | 1361.59        | 681.30           | 1360.61        | 680.81           | 14 |
| 8  | 685.77         | 343.39          |                |                  | 667.75         | 334.38           | P    | <b>1307.54</b> | <b>654.28</b>   | <b>1290.51</b> | 645.76           | <b>1289.53</b> | 645.27           | 13 |
| 9  | 772.85         | 386.93          |                |                  | <b>754.83</b>  | 377.92           | S    | 1210.43        | 605.72          | 1193.40        | 597.20           | 1192.41        | 596.71           | 12 |
| 10 | 843.92         | 422.47          |                |                  | <b>825.91</b>  | <b>413.46</b>    | A    | <b>1123.35</b> | 562.18          | 1106.32        | <b>553.66</b>    | 1105.34        | <b>553.17</b>    | 11 |
| 11 | 947.07         | 474.04          |                |                  | <b>929.05</b>  | 465.03           | C    | <b>1052.27</b> | 526.64          | 1035.24        | <b>518.13</b>    | 1034.26        | <b>517.63</b>    | 10 |
| 12 | <b>1050.21</b> | 525.61          |                |                  | 1032.20        | <b>516.60</b>    | C    | 949.13         | 475.07          | <b>932.10</b>  | 466.55           | <b>931.11</b>  | 466.06           | 9  |
| 13 | <b>1153.35</b> | 577.18          |                |                  | 1135.34        | 568.17           | C    | 845.99         | 423.50          | 828.96         | <b>414.98</b>    | 827.97         | 414.49           | 8  |
| 14 | <b>1240.43</b> | 620.72          |                |                  | <b>1222.42</b> | 611.71           | S    | <b>742.84</b>  | 371.93          | 725.81         | 363.41           | 724.83         | 362.92           | 7  |
| 15 | 1337.55        | 669.28          |                |                  | 1319.53        | 660.27           | P    | <b>655.77</b>  | 328.39          | 638.74         | 319.87           |                |                  | 6  |
| 16 | <b>1408.62</b> | 704.82          |                |                  | <b>1390.61</b> | 695.81           | A    | 558.65         | 279.83          | 541.62         | 271.31           |                |                  | 5  |
| 17 | <b>1479.70</b> | 740.35          |                |                  | 1461.69        | 731.35           | A    | 487.57         | 244.29          | 470.54         | 235.78           |                |                  | 4  |
| 18 | <b>1592.86</b> | 796.93          |                |                  | 1574.84        | 787.93           | L    | <b>416.50</b>  | 208.75          | 399.47         | 200.24           |                |                  | 3  |
| 19 | <b>1720.99</b> | <b>861.00</b>   | 1703.96        | 852.48           | 1702.97        | 851.99           | Q    | <b>303.34</b>  | 152.17          | 286.31         | 143.66           |                |                  | 2  |
| 20 |                |                 |                |                  |                |                  | R    | 175.21         | 88.11           | 158.18         | 79.59            |                |                  | 1  |

Gene Symbol  
SLC35B2

Sequences  
ACVFGNEPKASDEVPLAPR

m/z  
1001.13

Charge  
2+

Ion score  
86.8

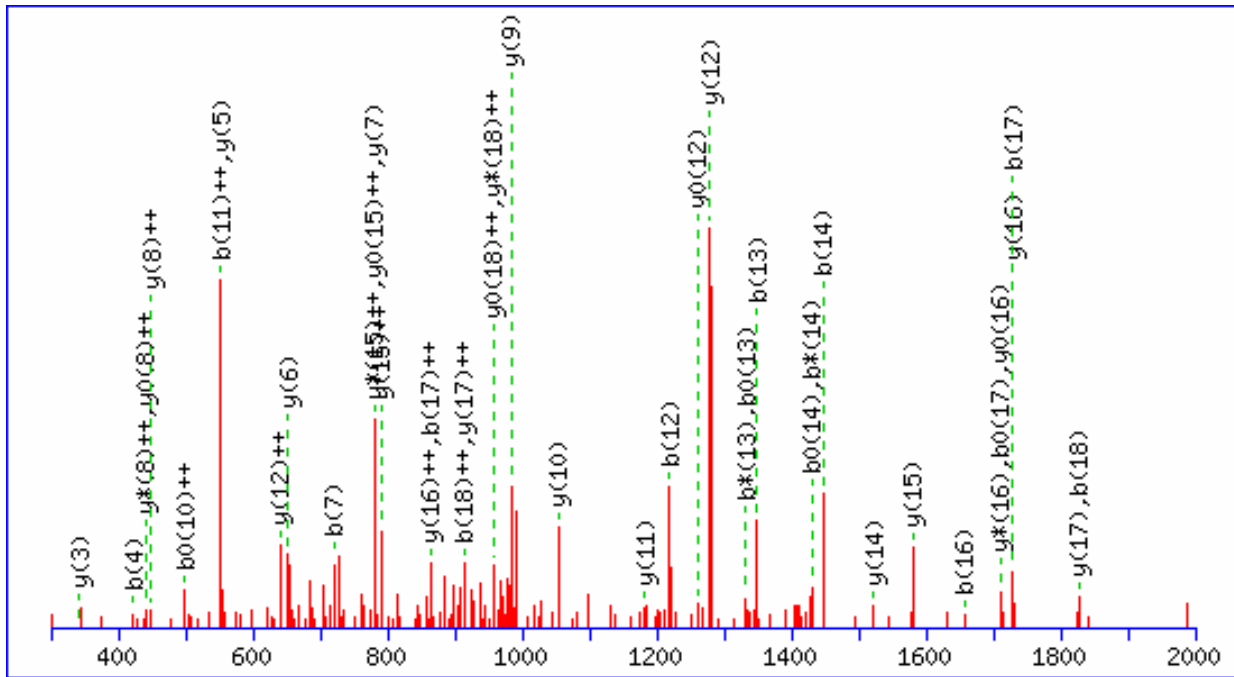

| #  | b       | b <sup>++</sup> | b <sup>*</sup> | b <sup>*++</sup> | b <sup>0</sup> | b <sup>0++</sup> | Seq. | y       | y <sup>++</sup> | y <sup>*</sup> | y <sup>*++</sup> | y <sup>0</sup> | y <sup>0++</sup> | #  |
|----|---------|-----------------|----------------|------------------|----------------|------------------|------|---------|-----------------|----------------|------------------|----------------|------------------|----|
| 1  | 72.09   | 36.55           |                |                  |                |                  | A    |         |                 |                |                  |                |                  | 19 |
| 2  | 175.23  | 88.12           |                |                  |                |                  | C    | 1930.17 | 965.59          | 1913.14        | 957.07           | 1912.15        | 956.58           | 18 |
| 3  | 274.36  | 137.68          |                |                  |                |                  | V    | 1827.02 | 914.02          | 1809.99        | 905.50           | 1809.01        | 905.01           | 17 |
| 4  | 421.53  | 211.27          |                |                  |                |                  | F    | 1727.89 | 864.45          | 1710.86        | 855.93           | 1709.88        | 855.44           | 16 |
| 5  | 478.59  | 239.80          |                |                  |                |                  | G    | 1580.72 | 790.86          | 1563.69        | 782.35           | 1562.70        | 781.86           | 15 |
| 6  | 592.69  | 296.85          | 575.66         | 288.33           |                |                  | N    | 1523.67 | 762.34          | 1506.64        | 753.82           | 1505.65        | 753.33           | 14 |
| 7  | 721.80  | 361.40          | 704.77         | 352.89           | 703.79         | 352.40           | E    | 1409.56 | 705.29          | 1392.53        | 696.77           | 1391.55        | 696.28           | 13 |
| 8  | 818.92  | 409.96          | 801.89         | 401.45           | 800.90         | 400.95           | P    | 1280.45 | 640.73          | 1263.42        | 632.21           | 1262.43        | 631.72           | 12 |
| 9  | 947.09  | 474.05          | 930.06         | 465.53           | 929.07         | 465.04           | K    | 1183.33 | 592.17          | 1166.30        | 583.66           | 1165.32        | 583.16           | 11 |
| 10 | 1018.17 | 509.59          | 1001.14        | 501.07           | 1000.15        | 500.58           | A    | 1055.16 | 528.09          | 1038.13        | 519.57           | 1037.15        | 519.08           | 10 |
| 11 | 1105.24 | 553.13          | 1088.21        | 544.61           | 1087.23        | 544.12           | S    | 984.08  | 492.55          | 967.05         | 484.03           | 966.07         | 483.54           | 9  |
| 12 | 1220.33 | 610.67          | 1203.30        | 602.15           | 1202.32        | 601.66           | D    | 897.01  | 449.01          | 879.98         | 440.49           | 878.99         | 440.00           | 8  |
| 13 | 1349.45 | 675.23          | 1332.42        | 666.71           | 1331.43        | 666.22           | E    | 781.92  | 391.46          | 764.89         | 382.95           | 763.90         | 382.46           | 7  |
| 14 | 1448.58 | 724.79          | 1431.55        | 716.28           | 1430.56        | 715.78           | V    | 652.81  | 326.91          | 635.78         | 318.39           |                |                  | 6  |
| 15 | 1545.69 | 773.35          | 1528.66        | 764.83           | 1527.68        | 764.34           | P    | 553.67  | 277.34          | 536.64         | 268.83           |                |                  | 5  |
| 16 | 1658.85 | 829.93          | 1641.82        | 821.41           | 1640.83        | 820.92           | L    | 456.56  | 228.78          | 439.53         | 220.27           |                |                  | 4  |
| 17 | 1729.93 | 865.47          | 1712.90        | 856.95           | 1711.91        | 856.46           | A    | 343.40  | 172.20          | 326.37         | 163.69           |                |                  | 3  |
| 18 | 1827.04 | 914.03          | 1810.01        | 905.51           | 1809.03        | 905.02           | P    | 272.32  | 136.67          | 255.29         | 128.15           |                |                  | 2  |
| 19 |         |                 |                |                  |                |                  | R    | 175.21  | 88.11           | 158.18         | 79.59            |                |                  | 1  |



Gene Symbol  
SLC35B2

Sequences  
GLCFPLVK

m/z  
438.60

Charge  
2+

Ion score  
49.2

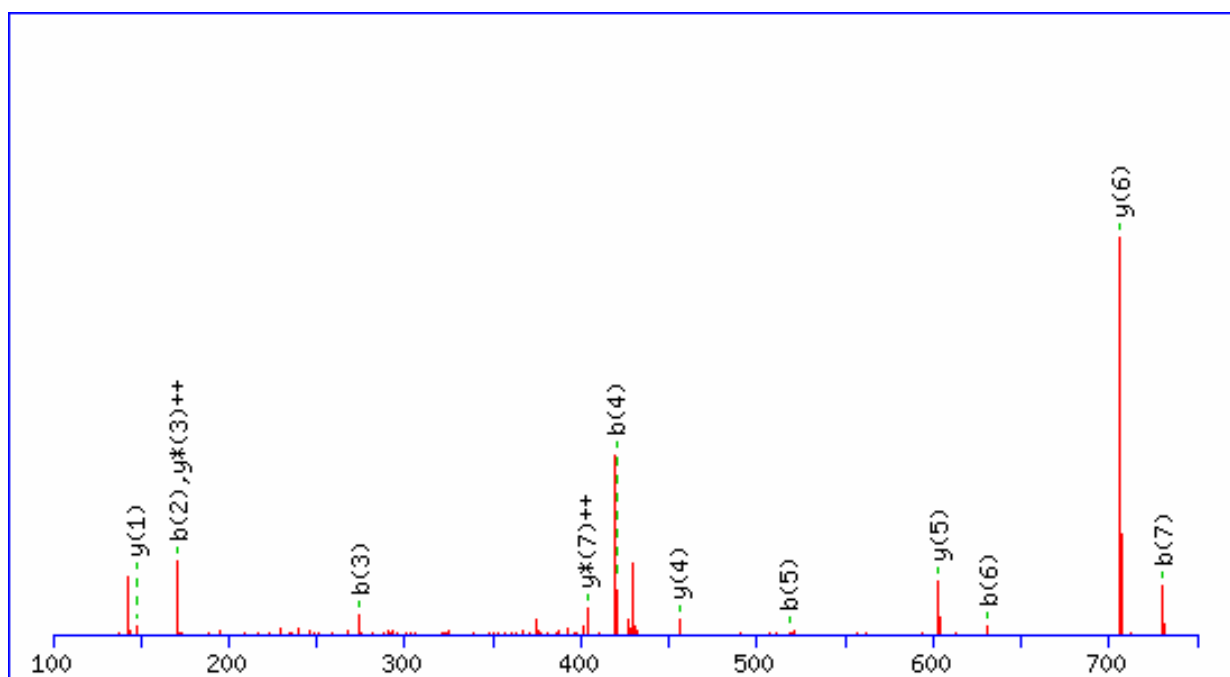

| # | b      | b <sup>++</sup> | Seq. | y      | y <sup>++</sup> | y*     | y <sup>+++</sup> | # |
|---|--------|-----------------|------|--------|-----------------|--------|------------------|---|
| 1 | 58.06  | 29.53           | G    |        |                 |        |                  | 8 |
| 2 | 171.22 | 86.11           | L    | 820.07 | 410.54          | 803.04 | 402.03           | 7 |
| 3 | 274.36 | 137.68          | C    | 706.92 | 353.96          | 689.89 | 345.45           | 6 |
| 4 | 421.53 | 211.27          | F    | 603.77 | 302.39          | 586.74 | 293.88           | 5 |
| 5 | 518.65 | 259.83          | P    | 456.60 | 228.80          | 439.57 | 220.29           | 4 |
| 6 | 631.81 | 316.41          | L    | 359.48 | 180.25          | 342.45 | 171.73           | 3 |
| 7 | 730.94 | 365.97          | V    | 246.33 | 123.67          | 229.30 | 115.15           | 2 |
| 8 |        |                 | K    | 147.20 | 74.10           | 130.16 | 65.59            | 1 |

Gene Symbol  
SLC5A6

Sequences  
SLNPATIIYPVLPKLLSLLPLSCQK

m/z  
870.73

Charge  
3+

Ion score  
84.6

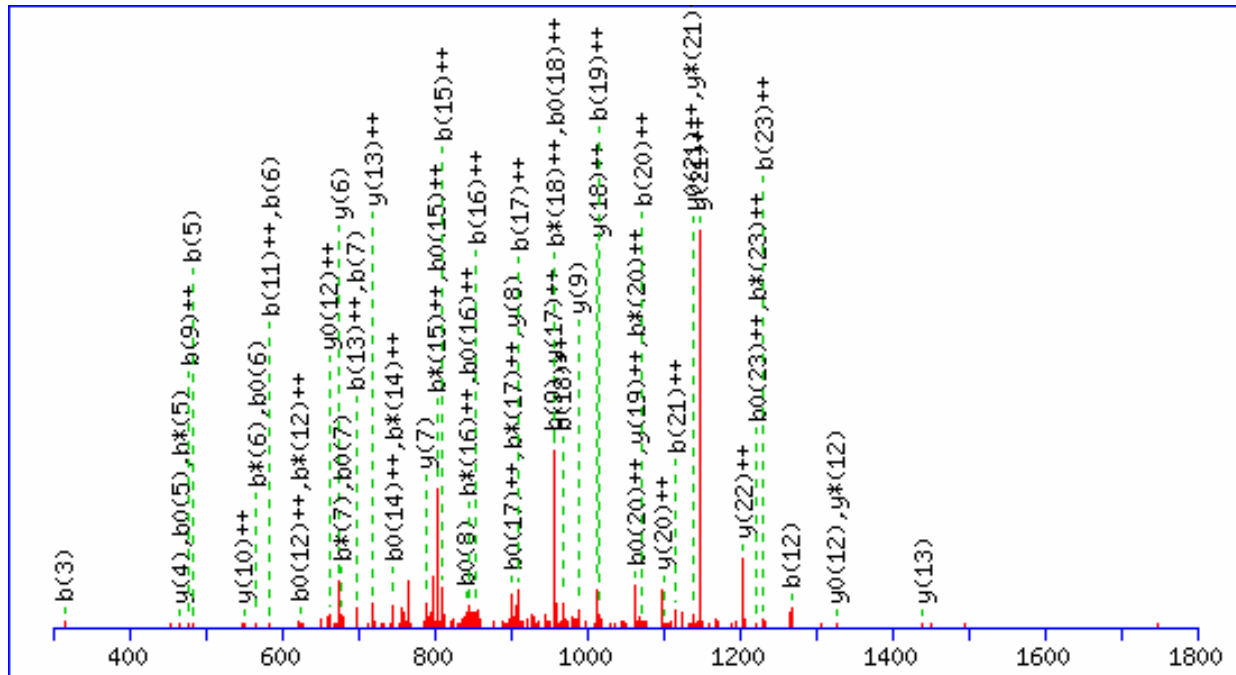

| #  | b              | b <sup>++</sup> | b <sup>+</sup> | b <sup>+++</sup> | b <sup>0</sup> | b <sup>0++</sup> | Seq. | y              | y <sup>++</sup> | y <sup>+</sup> | y <sup>+++</sup> | y <sup>0</sup> | y <sup>0++</sup> | #  |
|----|----------------|-----------------|----------------|------------------|----------------|------------------|------|----------------|-----------------|----------------|------------------|----------------|------------------|----|
| 1  | 88.09          | 44.55           |                |                  | 70.07          | 35.54            | S    |                |                 |                |                  |                |                  | 24 |
| 2  | 201.24         | 101.13          |                |                  | 183.23         | 92.12            | L    | 2523.10        | 1262.06         | 2506.07        | 1253.54          | 2505.09        | 1253.05          | 23 |
| 3  | <b>315.35</b>  | 158.18          | 298.31         | 149.66           | 297.33         | 149.17           | N    | 2409.95        | <b>1205.48</b>  | 2392.92        | 1196.96          | 2391.93        | 1196.47          | 22 |
| 4  | 412.46         | 206.73          | 395.43         | 198.22           | 394.45         | 197.73           | P    | 2295.84        | <b>1148.43</b>  | 2278.81        | <b>1139.91</b>   | 2277.83        | <b>1139.42</b>   | 21 |
| 5  | <b>483.54</b>  | 242.27          | <b>466.51</b>  | 233.76           | <b>465.52</b>  | 233.27           | A    | 2198.73        | <b>1099.87</b>  | 2181.70        | 1091.35          | 2180.71        | 1090.86          | 20 |
| 6  | <b>584.64</b>  | 292.83          | <b>567.61</b>  | 284.31           | <b>566.63</b>  | 283.82           | T    | 2127.65        | <b>1064.33</b>  | 2110.62        | 1055.81          | 2109.64        | 1055.32          | 19 |
| 7  | <b>697.80</b>  | 349.40          | <b>680.77</b>  | 340.89           | <b>679.78</b>  | 340.40           | I    | 2026.55        | <b>1013.78</b>  | 2009.52        | 1005.26          | 2008.53        | 1004.77          | 18 |
| 8  | 860.97         | 430.99          | 843.94         | 422.48           | <b>842.96</b>  | 421.98           | Y    | 1913.39        | <b>957.20</b>   | 1896.36        | 948.68           | 1895.37        | 948.19           | 17 |
| 9  | <b>958.09</b>  | <b>479.55</b>   | 941.06         | 471.03           | 940.07         | 470.54           | P    | 1750.22        | 875.61          | 1733.19        | 867.10           | 1732.20        | 866.60           | 16 |
| 10 | 1057.22        | 529.11          | 1040.19        | 520.60           | 1039.20        | 520.11           | V    | 1653.10        | 827.05          | 1636.07        | 818.54           | 1635.09        | 818.05           | 15 |
| 11 | 1170.38        | <b>585.69</b>   | 1153.35        | 577.18           | 1152.36        | 576.68           | L    | 1553.97        | 777.49          | 1536.94        | 768.97           | 1535.96        | 768.48           | 14 |
| 12 | <b>1267.49</b> | 634.25          | 1250.46        | <b>625.73</b>    | 1249.48        | <b>625.24</b>    | P    | <b>1440.81</b> | <b>720.91</b>   | 1423.78        | 712.40           | 1422.80        | 711.90           | 13 |
| 13 | 1395.66        | <b>698.34</b>   | 1378.63        | 689.82           | 1377.65        | 689.33           | K    | 1343.70        | 672.35          | <b>1326.67</b> | 663.84           | <b>1325.68</b> | <b>663.35</b>    | 12 |
| 14 | 1508.82        | 754.92          | 1491.79        | <b>746.40</b>    | 1490.81        | <b>745.91</b>    | L    | 1215.53        | 608.27          | 1198.49        | 599.75           | 1197.51        | 599.26           | 11 |
| 15 | 1621.98        | <b>811.49</b>   | 1604.95        | <b>802.98</b>    | 1603.96        | <b>802.49</b>    | L    | 1102.37        | <b>551.69</b>   | 1085.34        | 543.17           | 1084.35        | 542.68           | 10 |
| 16 | 1709.06        | <b>855.03</b>   | 1692.03        | <b>846.52</b>    | 1691.04        | <b>846.02</b>    | S    | <b>989.21</b>  | 495.11          | 972.18         | 486.59           | 971.19         | 486.10           | 9  |
| 17 | 1822.21        | <b>911.61</b>   | 1805.18        | <b>903.10</b>    | 1804.20        | <b>902.60</b>    | L    | <b>902.13</b>  | 451.57          | 885.10         | 443.06           | 884.12         | 442.56           | 8  |
| 18 | 1935.37        | <b>968.19</b>   | 1918.34        | <b>959.67</b>    | 1917.36        | <b>959.18</b>    | L    | <b>788.98</b>  | 394.99          | 771.94         | 386.48           | 770.96         | 385.98           | 7  |
| 19 | 2032.49        | <b>1016.75</b>  | 2015.46        | 1008.23          | 2014.47        | 1007.74          | P    | <b>675.82</b>  | 338.41          | 658.79         | 329.90           | 657.80         | 329.41           | 6  |
| 20 | 2145.65        | <b>1073.33</b>  | 2128.61        | <b>1064.81</b>   | 2127.63        | <b>1064.32</b>   | L    | 578.70         | 289.86          | 561.67         | 281.34           | 560.69         | 280.85           | 5  |
| 21 | 2232.72        | <b>1116.87</b>  | 2215.69        | 1108.35          | 2214.71        | 1107.86          | S    | <b>465.54</b>  | 233.28          | 448.51         | 224.76           | 447.53         | 224.27           | 4  |
| 22 | 2335.87        | 1168.44         | 2318.83        | 1159.92          | 2317.85        | 1159.43          | C    | 378.47         | 189.74          | 361.44         | 181.22           |                |                  | 3  |
| 23 | 2463.99        | <b>1232.50</b>  | 2446.96        | <b>1223.99</b>   | 2445.98        | <b>1223.49</b>   | Q    | 275.32         | 138.17          | 258.29         | 129.65           |                |                  | 2  |
| 24 |                |                 |                |                  |                |                  | K    | 147.20         | 74.10           | 130.17         | 65.59            |                |                  | 1  |

Gene Symbol  
SLC7A1

Sequences  
GCKVLLNIGQQLR

m/z  
808.44

Charge  
2+

Ion score  
91.6

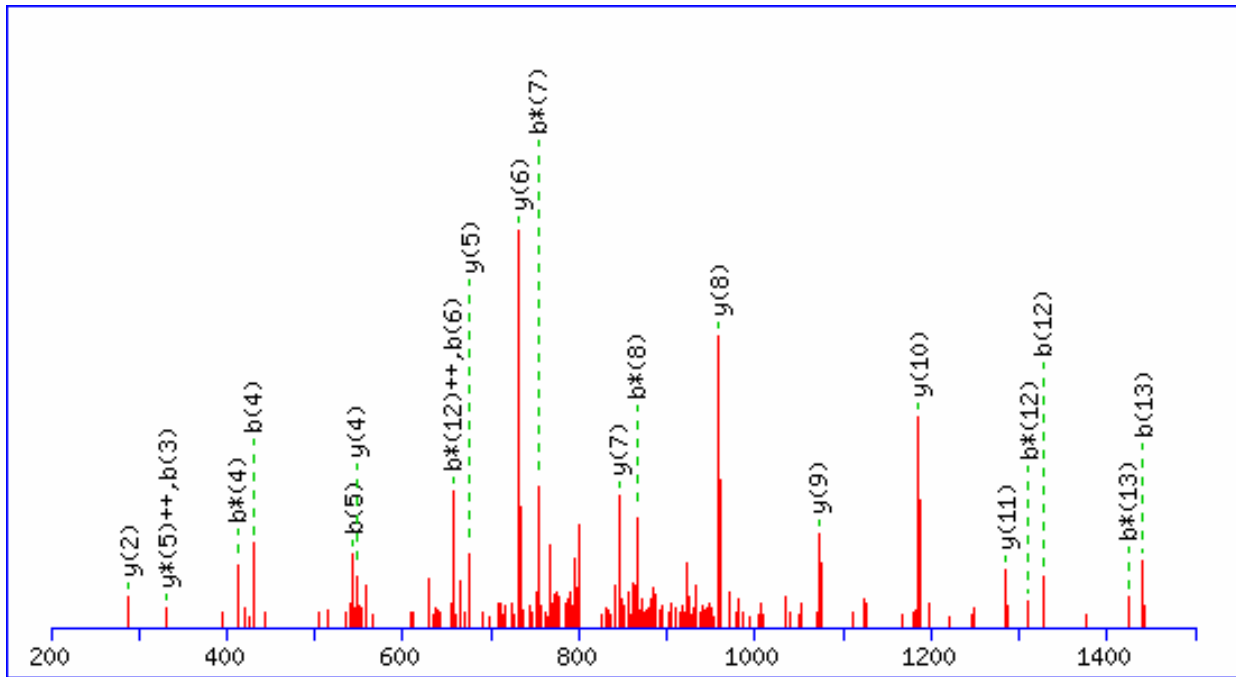

N-term : N-Acetyl (Protein)

| #  | b              | b <sup>++</sup> | b <sup>*</sup> | b <sup>***</sup> | Seq. | y              | y <sup>++</sup> | y <sup>*</sup> | y <sup>***</sup> | #  |
|----|----------------|-----------------|----------------|------------------|------|----------------|-----------------|----------------|------------------|----|
| 1  | 100.10         | 50.55           |                |                  | G    |                |                 |                |                  | 14 |
| 2  | 203.24         | 102.12          |                |                  | C    | 1516.89        | 758.95          | 1499.86        | 750.44           | 13 |
| 3  | <b>331.41</b>  | 166.21          | 314.38         | 157.69           | K    | 1413.75        | 707.38          | 1396.72        | 698.86           | 12 |
| 4  | <b>430.54</b>  | 215.78          | <b>413.51</b>  | 207.26           | V    | <b>1285.58</b> | 643.29          | 1268.55        | 634.78           | 11 |
| 5  | <b>543.70</b>  | 272.35          | 526.67         | 263.84           | L    | <b>1186.45</b> | 593.73          | 1169.42        | 585.21           | 10 |
| 6  | <b>656.86</b>  | 328.93          | 639.83         | 320.42           | L    | <b>1073.29</b> | 537.15          | 1056.26        | 528.63           | 9  |
| 7  | 770.96         | 385.98          | <b>753.93</b>  | 377.47           | N    | <b>960.13</b>  | 480.57          | 943.10         | 472.05           | 8  |
| 8  | 884.12         | 442.56          | <b>867.09</b>  | 434.05           | I    | <b>846.03</b>  | 423.52          | 829.00         | 415.00           | 7  |
| 9  | 941.17         | 471.09          | 924.14         | 462.57           | G    | <b>732.87</b>  | 366.94          | 715.84         | 358.42           | 6  |
| 10 | 1069.30        | 535.15          | 1052.27        | 526.64           | Q    | <b>675.82</b>  | 338.41          | 658.79         | <b>329.90</b>    | 5  |
| 11 | 1197.43        | 599.22          | 1180.40        | 590.70           | Q    | <b>547.69</b>  | 274.35          | 530.66         | 265.83           | 4  |
| 12 | <b>1328.62</b> | 664.82          | <b>1311.59</b> | <b>656.30</b>    | M    | 419.56         | 210.29          | 402.53         | 201.77           | 3  |
| 13 | <b>1441.78</b> | 721.39          | <b>1424.75</b> | 712.88           | L    | <b>288.37</b>  | 144.69          | 271.34         | 136.17           | 2  |
| 14 |                |                 |                |                  | R    | 175.21         | 88.11           | 158.18         | 79.59            | 1  |

Gene Symbol  
SNAP23

Sequences  
TLTELNKCCGLCVPCNR

m/z  
985.76

Charge  
2+

Ion score  
105.4

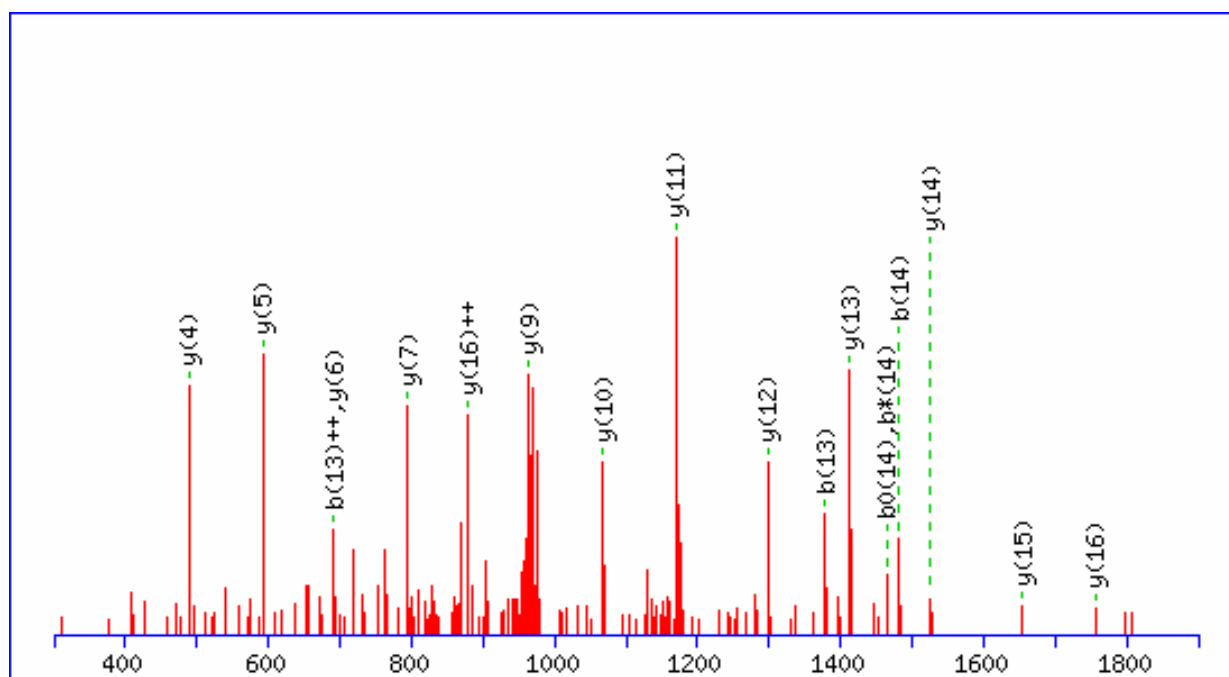

| #  | b       | b <sup>++</sup> | b <sup>*</sup> | b <sup>*++</sup> | b <sup>0</sup> | b <sup>0++</sup> | Seq. | y       | y <sup>++</sup> | y <sup>*</sup> | y <sup>*++</sup> | y <sup>0</sup> | y <sup>0++</sup> | #  |
|----|---------|-----------------|----------------|------------------|----------------|------------------|------|---------|-----------------|----------------|------------------|----------------|------------------|----|
| 1  | 102.11  | 51.56           |                |                  | 84.10          | 42.55            | T    |         |                 |                |                  |                |                  | 18 |
| 2  | 215.27  | 108.14          |                |                  | 197.25         | 99.13            | L    | 1870.29 | 935.65          | 1853.26        | 927.13           | 1852.27        | 926.64           | 17 |
| 3  | 316.37  | 158.69          |                |                  | 298.36         | 149.68           | T    | 1757.13 | 879.07          | 1740.10        | 870.55           | 1739.12        | 870.06           | 16 |
| 4  | 445.49  | 223.25          |                |                  | 427.47         | 214.24           | E    | 1656.03 | 828.52          | 1639.00        | 820.00           | 1638.01        | 819.51           | 15 |
| 5  | 558.64  | 279.83          |                |                  | 540.63         | 270.82           | L    | 1526.91 | 763.96          | 1509.88        | 755.45           |                |                  | 14 |
| 6  | 672.75  | 336.88          | 655.72         | 328.36           | 654.73         | 327.87           | N    | 1413.76 | 707.38          | 1396.73        | 698.87           |                |                  | 13 |
| 7  | 800.92  | 400.96          | 783.89         | 392.45           | 782.90         | 391.96           | K    | 1299.65 | 650.33          | 1282.62        | 641.82           |                |                  | 12 |
| 8  | 904.06  | 452.54          | 887.03         | 444.02           | 886.05         | 443.53           | C    | 1171.48 | 586.24          | 1154.45        | 577.73           |                |                  | 11 |
| 9  | 1007.21 | 504.11          | 990.18         | 495.59           | 989.19         | 495.10           | C    | 1068.34 | 534.67          | 1051.31        | 526.16           |                |                  | 10 |
| 10 | 1064.26 | 532.63          | 1047.23        | 524.12           | 1046.24        | 523.62           | G    | 965.20  | 483.10          | 948.16         | 474.59           |                |                  | 9  |
| 11 | 1177.41 | 589.21          | 1160.38        | 580.70           | 1159.40        | 580.20           | L    | 908.14  | 454.58          | 891.11         | 446.06           |                |                  | 8  |
| 12 | 1280.56 | 640.78          | 1263.53        | 632.27           | 1262.54        | 631.78           | C    | 794.99  | 398.00          | 777.96         | 389.48           |                |                  | 7  |
| 13 | 1379.69 | 690.35          | 1362.66        | 681.83           | 1361.67        | 681.34           | V    | 691.84  | 346.43          | 674.81         | 337.91           |                |                  | 6  |
| 14 | 1482.83 | 741.92          | 1465.80        | 733.40           | 1464.82        | 732.91           | C    | 592.71  | 296.86          | 575.68         | 288.34           |                |                  | 5  |
| 15 | 1579.95 | 790.48          | 1562.92        | 781.96           | 1561.93        | 781.47           | P    | 489.57  | 245.29          | 472.54         | 236.77           |                |                  | 4  |
| 16 | 1683.09 | 842.05          | 1666.06        | 833.53           | 1665.07        | 833.04           | C    | 392.45  | 196.73          | 375.42         | 188.22           |                |                  | 3  |
| 17 | 1797.19 | 899.10          | 1780.16        | 890.58           | 1779.18        | 890.09           | N    | 289.31  | 145.16          | 272.28         | 136.64           |                |                  | 2  |
| 18 |         |                 |                |                  |                |                  | R    | 175.21  | 88.11           | 158.18         | 79.59            |                |                  | 1  |

Gene Symbol  
SNAP23

Sequences  
TTWGDGGENSPCNVVS

m/z  
876.74

Charge  
2+

Ion score  
91.4

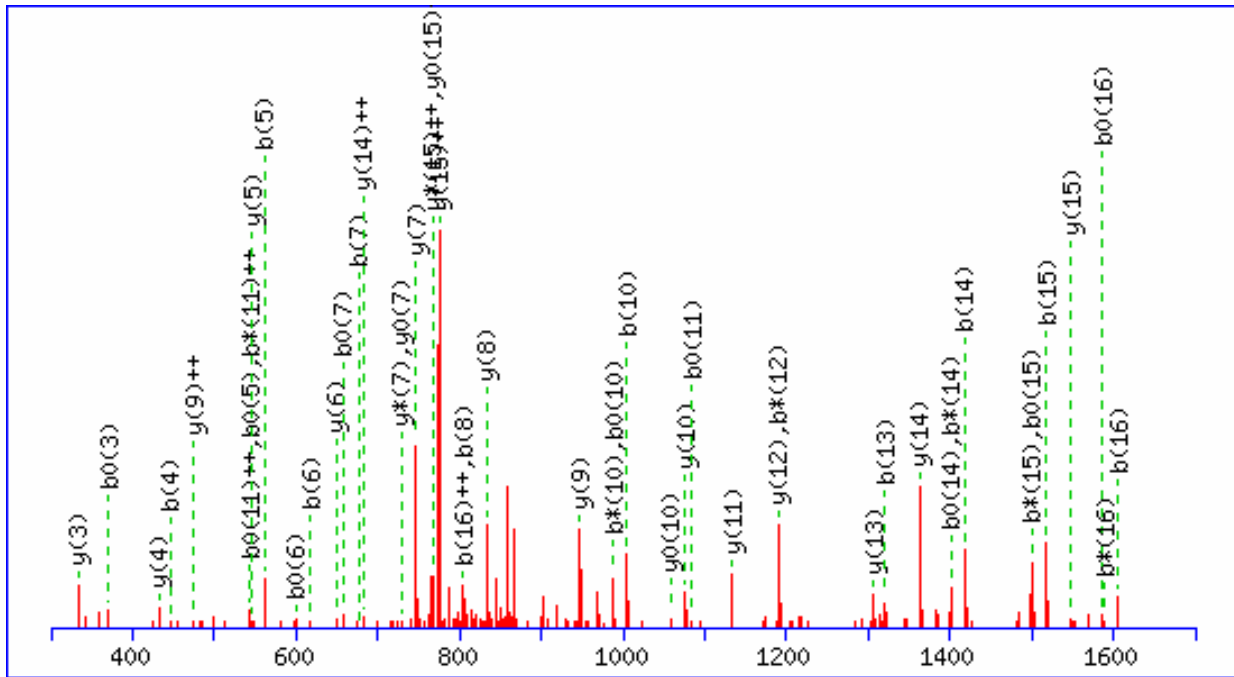

| #  | b              | b <sup>++</sup> | b <sup>*</sup> | b <sup>***</sup> | b <sup>0</sup> | b <sup>0++</sup> | Seq. | y              | y <sup>++</sup> | y <sup>*</sup> | y <sup>***</sup> | y <sup>0</sup> | y <sup>0++</sup> | #  |
|----|----------------|-----------------|----------------|------------------|----------------|------------------|------|----------------|-----------------|----------------|------------------|----------------|------------------|----|
| 1  | 102.11         | 51.56           |                |                  | 84.10          | 42.55            | T    |                |                 |                |                  |                |                  | 17 |
| 2  | 203.22         | 102.11          |                |                  | 185.20         | 93.10            | T    | 1650.74        | 825.88          | 1633.71        | 817.36           | 1632.73        | 816.87           | 16 |
| 3  | 389.43         | 195.22          |                |                  | <b>371.41</b>  | 186.21           | W    | <b>1549.64</b> | <b>775.32</b>   | 1532.61        | <b>766.81</b>    | 1531.63        | <b>766.32</b>    | 15 |
| 4  | <b>446.48</b>  | 223.74          |                |                  | 428.46         | 214.73           | G    | <b>1363.43</b> | <b>682.22</b>   | 1346.40        | 673.70           | 1345.42        | 673.21           | 14 |
| 5  | <b>561.56</b>  | 281.29          |                |                  | <b>543.55</b>  | 272.28           | D    | <b>1306.38</b> | 653.69          | 1289.35        | 645.18           | 1288.36        | 644.69           | 13 |
| 6  | <b>618.62</b>  | 309.81          |                |                  | <b>600.60</b>  | 300.80           | G    | <b>1191.29</b> | 596.15          | 1174.26        | 587.63           | 1173.28        | 587.14           | 12 |
| 7  | <b>675.67</b>  | 338.34          |                |                  | <b>657.65</b>  | 329.33           | G    | <b>1134.24</b> | 567.62          | 1117.21        | 559.11           | 1116.23        | 558.62           | 11 |
| 8  | <b>804.78</b>  | 402.89          |                |                  | 786.77         | 393.89           | E    | <b>1077.19</b> | 539.10          | 1060.16        | 530.58           | <b>1059.17</b> | 530.09           | 10 |
| 9  | 918.88         | 459.95          | 901.85         | 451.43           | 900.87         | 450.94           | N    | <b>948.08</b>  | <b>474.54</b>   | 931.05         | 466.03           | 930.06         | 465.53           | 9  |
| 10 | <b>1005.96</b> | 503.48          | <b>988.93</b>  | 494.97           | <b>987.95</b>  | 494.48           | S    | <b>833.97</b>  | 417.49          | 816.94         | 408.98           | 815.96         | 408.48           | 8  |
| 11 | 1103.08        | 552.04          | 1086.05        | <b>543.53</b>    | <b>1085.06</b> | <b>543.03</b>    | P    | <b>746.90</b>  | 373.95          | <b>729.87</b>  | 365.44           | <b>728.88</b>  | 364.94           | 7  |
| 12 | 1206.22        | 603.61          | <b>1189.19</b> | 595.10           | 1188.20        | 594.61           | C    | <b>649.78</b>  | 325.39          | 632.75         | 316.88           | 631.77         | 316.39           | 6  |
| 13 | <b>1320.32</b> | 660.66          | 1303.29        | 652.15           | 1302.31        | 651.66           | N    | <b>546.64</b>  | 273.82          | 529.61         | 265.31           | 528.62         | 264.82           | 5  |
| 14 | <b>1419.45</b> | 710.23          | <b>1402.42</b> | 701.72           | <b>1401.44</b> | 701.22           | V    | <b>432.54</b>  | 216.77          | 415.50         | 208.26           | 414.52         | 207.76           | 4  |
| 15 | <b>1518.58</b> | 759.80          | <b>1501.55</b> | 751.28           | <b>1500.57</b> | 750.79           | V    | <b>333.40</b>  | 167.21          | 316.37         | 158.69           | 315.39         | 158.20           | 3  |
| 16 | <b>1605.66</b> | <b>803.33</b>   | <b>1588.63</b> | 794.82           | <b>1587.65</b> | 794.33           | S    | 234.27         | 117.64          | 217.24         | 109.13           | 216.26         | 108.63           | 2  |
| 17 |                |                 |                |                  |                |                  | K    | 147.20         | 74.10           | 130.16         | 65.59            |                |                  | 1  |

Gene Symbol  
SNRPD3

Sequences  
SIGVPIKVLHEAEGHIVT**C**ETNTGEVYR

m/z  
1032.25

Charge  
3+

Ion score  
61.4

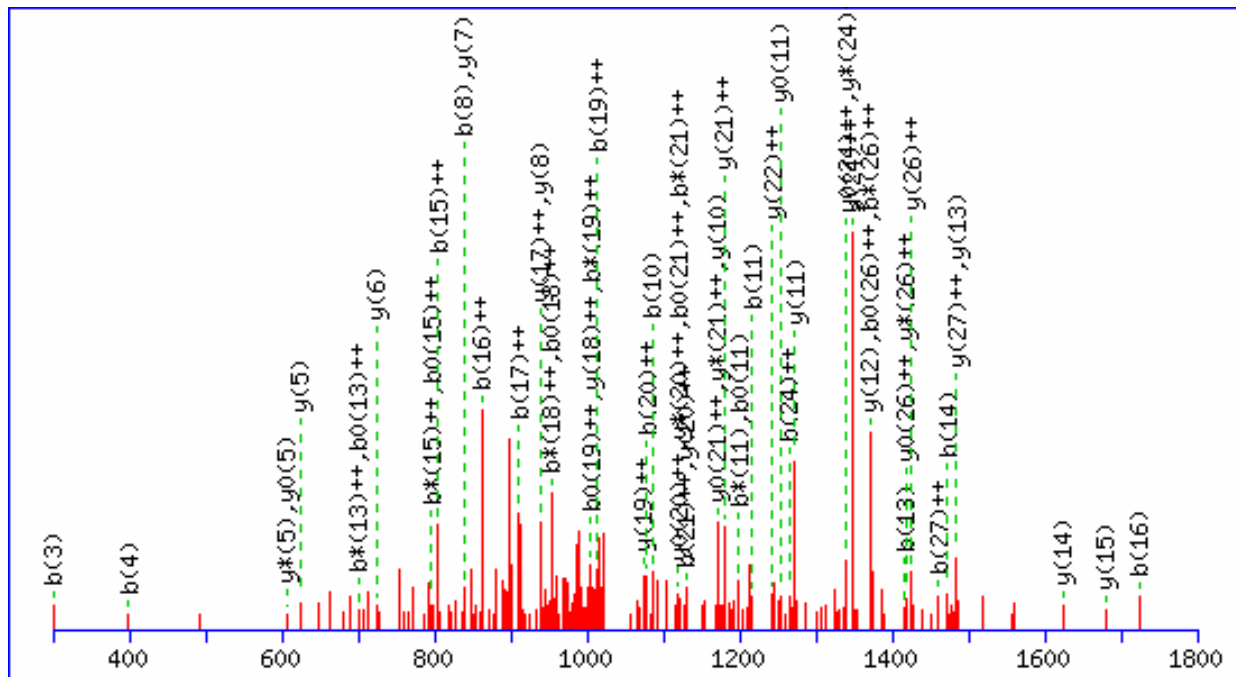

N-term : N-Acetyl (Protein)

| #  | b       | b <sup>++</sup> | b <sup>+</sup> | b <sup>+++</sup> | b <sup>0</sup> | b <sup>0++</sup> | Seq. | y       | y <sup>++</sup> | y <sup>+</sup> | y <sup>+++</sup> | y <sup>0</sup> | y <sup>0++</sup> | #  |
|----|---------|-----------------|----------------|------------------|----------------|------------------|------|---------|-----------------|----------------|------------------|----------------|------------------|----|
| 1  | 130.12  | 65.56           |                |                  | 112.11         | 56.56            | S    |         |                 |                |                  |                |                  | 28 |
| 2  | 243.28  | 122.14          |                |                  | 225.26         | 113.14           | I    | 2966.35 | 1483.68         | 2949.32        | 1475.16          | 2948.33        | 1474.67          | 27 |
| 3  | 300.33  | 150.67          |                |                  | 282.32         | 141.66           | G    | 2853.19 | 1427.10         | 2836.16        | 1418.58          | 2835.18        | 1418.09          | 26 |
| 4  | 399.46  | 200.23          |                |                  | 381.45         | 191.23           | V    | 2796.14 | 1398.57         | 2779.11        | 1390.06          | 2778.12        | 1389.57          | 25 |
| 5  | 496.58  | 248.79          |                |                  | 478.56         | 239.78           | P    | 2697.01 | 1349.01         | 2679.98        | 1340.49          | 2678.99        | 1340.00          | 24 |
| 6  | 609.73  | 305.37          |                |                  | 591.72         | 296.36           | I    | 2599.89 | 1300.45         | 2582.86        | 1291.94          | 2581.88        | 1291.44          | 23 |
| 7  | 737.91  | 369.46          | 720.88         | 360.94           | 719.89         | 360.45           | K    | 2486.74 | 1243.87         | 2469.70        | 1235.36          | 2468.72        | 1234.86          | 22 |
| 8  | 837.04  | 419.02          | 820.01         | 410.51           | 819.02         | 410.02           | V    | 2358.56 | 1179.79         | 2341.53        | 1171.27          | 2340.55        | 1170.78          | 21 |
| 9  | 950.20  | 475.60          | 933.17         | 467.09           | 932.18         | 466.59           | L    | 2259.43 | 1130.22         | 2242.40        | 1121.70          | 2241.42        | 1121.21          | 20 |
| 10 | 1087.34 | 544.17          | 1070.30        | 535.66           | 1069.32        | 535.16           | H    | 2146.27 | 1073.64         | 2129.24        | 1065.13          | 2128.26        | 1064.63          | 19 |
| 11 | 1216.45 | 608.73          | 1199.42        | 600.21           | 1198.43        | 599.72           | E    | 2009.14 | 1005.07         | 1992.10        | 996.56           | 1991.12        | 996.06           | 18 |
| 12 | 1287.53 | 644.27          | 1270.50        | 635.75           | 1269.51        | 635.26           | A    | 1880.02 | 940.51          | 1862.99        | 932.00           | 1862.01        | 931.51           | 17 |
| 13 | 1416.64 | 708.82          | 1399.61        | 700.31           | 1398.63        | 699.82           | E    | 1808.94 | 904.98          | 1791.91        | 896.46           | 1790.93        | 895.97           | 16 |
| 14 | 1473.69 | 737.35          | 1456.66        | 728.83           | 1455.68        | 728.34           | G    | 1679.83 | 840.42          | 1662.80        | 831.90           | 1661.81        | 831.41           | 15 |
| 15 | 1610.83 | 805.92          | 1593.80        | 797.40           | 1592.82        | 796.91           | H    | 1622.78 | 811.89          | 1605.75        | 803.38           | 1604.76        | 802.89           | 14 |
| 16 | 1723.99 | 862.50          | 1706.96        | 853.98           | 1705.97        | 853.49           | I    | 1485.64 | 743.32          | 1468.61        | 734.81           | 1467.62        | 734.32           | 13 |
| 17 | 1823.12 | 912.06          | 1806.09        | 903.55           | 1805.10        | 903.06           | V    | 1372.48 | 686.74          | 1355.45        | 678.23           | 1354.47        | 677.74           | 12 |
| 18 | 1924.22 | 962.62          | 1907.19        | 954.10           | 1906.21        | 953.61           | T    | 1273.35 | 637.18          | 1256.32        | 628.66           | 1255.33        | 628.17           | 11 |
| 19 | 2027.37 | 1014.19         | 2010.34        | 1005.67          | 2009.35        | 1005.18          | C    | 1172.25 | 586.63          | 1155.22        | 578.11           | 1154.23        | 577.62           | 10 |
| 20 | 2156.48 | 1078.74         | 2139.45        | 1070.23          | 2138.47        | 1069.74          | E    | 1069.10 | 535.06          | 1052.07        | 526.54           | 1051.09        | 526.05           | 9  |
| 21 | 2257.58 | 1129.30         | 2240.55        | 1120.78          | 2239.57        | 1120.29          | T    | 939.99  | 470.50          | 922.96         | 461.98           | 921.97         | 461.49           | 8  |
| 22 | 2371.69 | 1186.35         | 2354.66        | 1177.83          | 2353.67        | 1177.34          | N    | 838.89  | 419.95          | 821.85         | 411.43           | 820.87         | 410.94           | 7  |
| 23 | 2472.79 | 1236.90         | 2455.76        | 1228.38          | 2454.78        | 1227.89          | T    | 724.78  | 362.90          | 707.75         | 354.38           | 706.77         | 353.89           | 6  |
| 24 | 2529.84 | 1265.43         | 2512.81        | 1256.91          | 2511.83        | 1256.42          | G    | 623.68  | 312.34          | 606.65         | 303.83           | 605.66         | 303.34           | 5  |
| 25 | 2658.96 | 1329.98         | 2641.93        | 1321.47          | 2640.94        | 1320.97          | E    | 566.63  | 283.82          | 549.60         | 275.30           | 548.61         | 274.81           | 4  |
| 26 | 2758.09 | 1379.55         | 2741.06        | 1371.03          | 2740.07        | 1370.54          | V    | 437.51  | 219.26          | 420.48         | 210.75           |                |                  | 3  |
| 27 | 2921.26 | 1461.13         | 2904.23        | 1452.62          | 2903.25        | 1452.13          | Y    | 338.38  | 169.70          | 321.35         | 161.18           |                |                  | 2  |
| 28 |         |                 |                |                  |                |                  | R    | 175.21  | 88.11           | 158.18         | 79.59            |                |                  | 1  |

Gene Symbol  
STOM

Sequences  
GPGGLFFILP**C**TDSFIK

m/z  
878.07

Charge  
2+

Ion score  
79.7

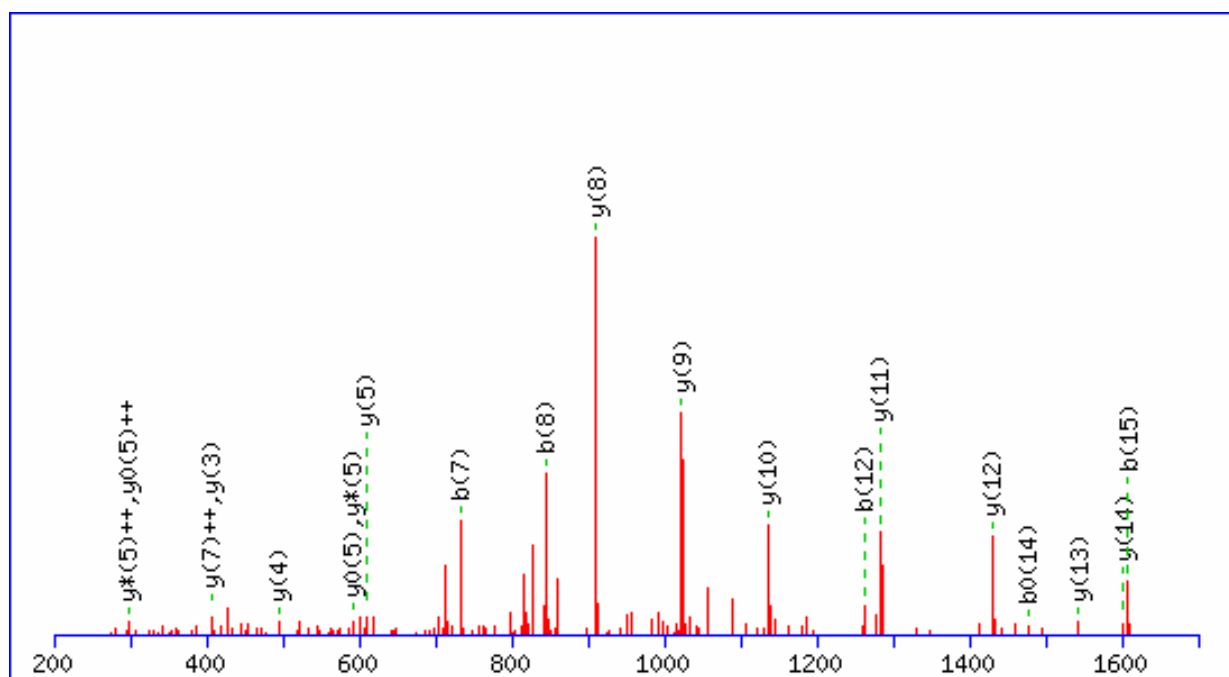

| #  | b              | b <sup>++</sup> | b <sup>0</sup> | b <sup>0++</sup> | Seq. | y              | y <sup>++</sup> | y <sup>*</sup> | y <sup>+++</sup> | y <sup>0</sup> | y <sup>0++</sup> | #  |
|----|----------------|-----------------|----------------|------------------|------|----------------|-----------------|----------------|------------------|----------------|------------------|----|
| 1  | 58.06          | 29.53           |                |                  | G    |                |                 |                |                  |                |                  | 16 |
| 2  | 155.17         | 78.09           |                |                  | P    | 1699.04        | 850.02          | 1682.01        | 841.51           | 1681.03        | 841.02           | 15 |
| 3  | 212.23         | 106.62          |                |                  | G    | <b>1601.93</b> | 801.47          | 1584.90        | 792.95           | 1583.91        | 792.46           | 14 |
| 4  | 325.38         | 163.20          |                |                  | L    | <b>1544.87</b> | 772.94          | 1527.84        | 764.43           | 1526.86        | 763.93           | 13 |
| 5  | 472.56         | 236.78          |                |                  | F    | <b>1431.72</b> | 716.36          | 1414.69        | 707.85           | 1413.70        | 707.35           | 12 |
| 6  | 619.73         | 310.37          |                |                  | F    | <b>1284.54</b> | 642.78          | 1267.51        | 634.26           | 1266.53        | 633.77           | 11 |
| 7  | <b>732.89</b>  | 366.95          |                |                  | I    | <b>1137.37</b> | 569.19          | 1120.34        | 560.67           | 1119.35        | 560.18           | 10 |
| 8  | <b>846.05</b>  | 423.53          |                |                  | L    | <b>1024.21</b> | 512.61          | 1007.18        | 504.09           | 1006.20        | 503.60           | 9  |
| 9  | 943.16         | 472.08          |                |                  | P    | <b>911.05</b>  | 456.03          | 894.02         | 447.52           | 893.04         | 447.02           | 8  |
| 10 | 1046.30        | 523.66          |                |                  | C    | 813.94         | <b>407.47</b>   | 796.91         | 398.96           | 795.92         | 398.47           | 7  |
| 11 | 1147.41        | 574.21          | 1129.39        | 565.20           | T    | 710.80         | 355.90          | 693.77         | 347.39           | 692.78         | 346.89           | 6  |
| 12 | <b>1262.50</b> | 631.75          | 1244.48        | 622.74           | D    | <b>609.69</b>  | 305.35          | <b>592.66</b>  | <b>296.83</b>    | <b>591.68</b>  | <b>296.34</b>    | 5  |
| 13 | 1349.57        | 675.29          | 1331.56        | 666.28           | S    | <b>494.60</b>  | 247.81          | 477.57         | 239.29           | 476.59         | 238.80           | 4  |
| 14 | 1496.75        | 748.88          | <b>1478.73</b> | 739.87           | F    | <b>407.53</b>  | 204.27          | 390.50         | 195.75           |                |                  | 3  |
| 15 | <b>1609.90</b> | 805.46          | 1591.89        | 796.45           | I    | 260.35         | 130.68          | 243.32         | 122.17           |                |                  | 2  |
| 16 |                |                 |                |                  | K    | 147.20         | 74.10           | 130.16         | 65.59            |                |                  | 1  |

Gene Symbol: TNKS1BP1 Sequences: EAALPILEPVLGQEQAAPDQPCVLFADAPEPGQALPVEEEAVTLAR m/z: 1223.72 Charge: 4+ Ion score: 48.8

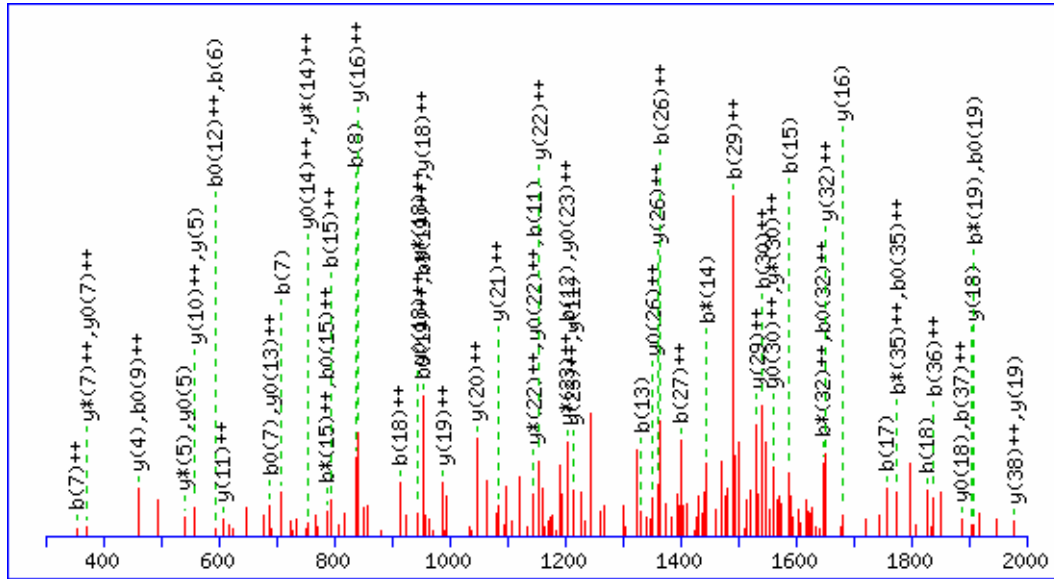

| #  | b       | b <sup>++</sup> | b <sup>+</sup> | b <sup>+++</sup> | b <sup>0</sup> | b <sup>0++</sup> | Seq | y       | y <sup>++</sup> | y <sup>+</sup> | y <sup>+++</sup> | y <sup>0</sup> | y <sup>0++</sup> | #  |
|----|---------|-----------------|----------------|------------------|----------------|------------------|-----|---------|-----------------|----------------|------------------|----------------|------------------|----|
| 1  | 130.12  | 65.56           |                |                  | 112.11         | 56.56            | E   |         |                 |                |                  |                |                  | 47 |
| 2  | 201.20  | 101.10          |                |                  | 183.18         | 92.10            | A   | 4763.36 | 2382.18         | 4746.33        | 2373.67          | 4745.34        | 2373.18          | 46 |
| 3  | 272.28  | 136.64          |                |                  | 254.26         | 127.64           | A   | 4692.28 | 2346.64         | 4675.25        | 2338.13          | 4674.26        | 2337.64          | 45 |
| 4  | 385.44  | 193.22          |                |                  | 367.42         | 184.21           | L   | 4621.20 | 2311.11         | 4604.17        | 2302.59          | 4603.19        | 2302.10          | 44 |
| 5  | 482.55  | 241.78          |                |                  | 464.54         | 232.77           | P   | 4508.04 | 2254.53         | 4491.01        | 2246.01          | 4490.03        | 2245.52          | 43 |
| 6  | 595.71  | 298.36          |                |                  | 577.69         | 289.35           | I   | 4410.93 | 2205.97         | 4393.90        | 2197.45          | 4392.91        | 2196.96          | 42 |
| 7  | 708.87  | 354.94          |                |                  | 690.85         | 345.93           | L   | 4297.77 | 2149.39         | 4280.74        | 2140.87          | 4279.76        | 2140.38          | 41 |
| 8  | 837.98  | 419.49          |                |                  | 819.96         | 410.49           | E   | 4184.61 | 2092.81         | 4167.58        | 2084.30          | 4166.60        | 2083.80          | 40 |
| 9  | 935.09  | 468.05          |                |                  | 917.08         | 459.04           | P   | 4055.50 | 2028.25         | 4038.47        | 2019.74          | 4037.49        | 2019.25          | 39 |
| 10 | 1034.23 | 517.62          |                |                  | 1016.21        | 508.61           | V   | 3958.39 | 1979.70         | 3941.35        | 1971.18          | 3940.37        | 1970.69          | 38 |
| 11 | 1147.38 | 574.20          |                |                  | 1129.37        | 565.19           | L   | 3859.25 | 1930.13         | 3842.22        | 1921.62          | 3841.24        | 1921.12          | 37 |
| 12 | 1204.43 | 602.72          |                |                  | 1186.42        | 593.71           | G   | 3746.10 | 1873.55         | 3729.07        | 1865.04          | 3728.08        | 1864.54          | 36 |
| 13 | 1332.56 | 666.79          | 1315.53        | 658.27           | 1314.55        | 657.78           | Q   | 3689.05 | 1845.03         | 3672.01        | 1836.51          | 3671.03        | 1836.02          | 35 |
| 14 | 1461.68 | 731.34          | 1444.65        | 722.83           | 1443.66        | 722.34           | E   | 3560.92 | 1780.96         | 3543.89        | 1772.45          | 3542.90        | 1771.95          | 34 |
| 15 | 1589.81 | 795.41          | 1572.78        | 786.89           | 1571.79        | 786.40           | Q   | 3431.80 | 1716.40         | 3414.77        | 1707.89          | 3413.79        | 1707.40          | 33 |
| 16 | 1686.92 | 843.97          | 1669.89        | 835.45           | 1668.91        | 834.96           | P   | 3303.67 | 1652.34         | 3286.64        | 1643.83          | 3285.66        | 1643.33          | 32 |
| 17 | 1758.00 | 879.50          | 1740.97        | 870.99           | 1739.99        | 870.50           | A   | 3206.56 | 1603.78         | 3189.53        | 1595.27          | 3188.54        | 1594.78          | 31 |
| 18 | 1829.08 | 915.04          | 1812.05        | 906.53           | 1811.06        | 906.04           | A   | 3135.48 | 1568.24         | 3118.45        | 1559.73          | 3117.46        | 1559.24          | 30 |
| 19 | 1926.19 | 963.60          | 1909.16        | 955.09           | 1908.18        | 954.59           | P   | 3064.40 | 1532.70         | 3047.37        | 1524.19          | 3046.39        | 1523.70          | 29 |
| 20 | 2041.28 | 1021.14         | 2024.25        | 1012.63          | 2023.27        | 1012.14          | D   | 2967.29 | 1484.15         | 2950.26        | 1475.63          | 2949.27        | 1475.14          | 28 |
| 21 | 2169.41 | 1085.21         | 2152.38        | 1076.69          | 2151.39        | 1076.20          | Q   | 2852.20 | 1426.60         | 2835.17        | 1418.09          | 2834.18        | 1417.60          | 27 |
| 22 | 2266.53 | 1133.77         | 2249.49        | 1125.25          | 2248.51        | 1124.76          | P   | 2724.07 | 1362.54         | 2707.04        | 1354.02          | 2706.05        | 1353.53          | 26 |
| 23 | 2369.67 | 1183.34         | 2352.64        | 1176.82          | 2351.65        | 1176.33          | C   | 2626.95 | 1313.98         | 2609.92        | 1305.47          | 2608.94        | 1304.97          | 25 |
| 24 | 2468.80 | 1234.90         | 2451.77        | 1226.39          | 2450.78        | 1225.90          | V   | 2523.81 | 1262.41         | 2506.78        | 1253.89          | 2505.80        | 1253.40          | 24 |
| 25 | 2581.96 | 1291.48         | 2564.93        | 1282.97          | 2563.94        | 1282.47          | L   | 2424.68 | 1212.84         | 2407.65        | 1204.33          | 2406.67        | 1203.84          | 23 |
| 26 | 2729.13 | 1365.07         | 2712.10        | 1356.55          | 2711.12        | 1356.06          | F   | 2311.52 | 1156.27         | 2294.49        | 1147.75          | 2293.51        | 1147.26          | 22 |
| 27 | 2800.21 | 1400.61         | 2783.18        | 1392.09          | 2782.19        | 1391.60          | A   | 2164.35 | 1082.68         | 2147.32        | 1074.16          | 2146.33        | 1073.67          | 21 |
| 28 | 2915.30 | 1458.15         | 2898.27        | 1449.64          | 2897.28        | 1449.14          | D   | 2093.27 | 1047.14         | 2076.24        | 1038.62          | 2075.26        | 1038.13          | 20 |
| 29 | 2986.37 | 1493.69         | 2969.34        | 1485.18          | 2968.36        | 1484.68          | A   | 1978.18 | 989.60          | 1961.15        | 981.08           | 1960.17        | 980.59           | 19 |
| 30 | 3083.49 | 1542.25         | 3066.46        | 1533.73          | 3065.47        | 1533.24          | P   | 1907.11 | 954.06          | 1890.08        | 945.54           | 1889.09        | 945.06           | 18 |
| 31 | 3212.60 | 1606.81         | 3195.57        | 1598.29          | 3194.59        | 1597.80          | E   | 1809.99 | 905.50          | 1792.96        | 896.98           | 1791.98        | 896.49           | 17 |
| 32 | 3309.72 | 1655.36         | 3292.69        | 1646.85          | 3291.70        | 1646.36          | P   | 1680.88 | 840.94          | 1663.85        | 832.43           | 1662.86        | 831.93           | 16 |
| 33 | 3366.77 | 1683.89         | 3349.74        | 1675.37          | 3348.75        | 1674.88          | G   | 1583.76 | 792.38          | 1566.73        | 783.87           | 1565.75        | 783.38           | 15 |
| 34 | 3494.90 | 1747.95         | 3477.87        | 1739.44          | 3476.88        | 1738.95          | Q   | 1526.71 | 763.86          | 1509.68        | 755.34           | 1508.70        | 754.85           | 14 |
| 35 | 3565.98 | 1783.49         | 3548.95        | 1774.98          | 3547.96        | 1774.48          | A   | 1398.58 | 699.79          | 1381.55        | 691.28           | 1380.57        | 690.79           | 13 |
| 36 | 3679.13 | 1840.07         | 3662.10        | 1831.56          | 3661.12        | 1831.06          | L   | 1327.50 | 664.26          | 1310.47        | 655.74           | 1309.49        | 655.25           | 12 |
| 37 | 3776.25 | 1888.63         | 3759.22        | 1880.11          | 3758.23        | 1879.62          | P   | 1214.36 | 607.68          | 1197.32        | 599.16           | 1196.33        | 598.67           | 11 |
| 38 | 3875.38 | 1938.19         | 3858.35        | 1929.68          | 3857.37        | 1929.19          | V   | 1117.23 | 559.12          | 1100.20        | 550.60           | 1099.22        | 550.11           | 10 |
| 39 | 4004.49 | 2002.75         | 3987.46        | 1994.24          | 3986.48        | 1993.74          | E   | 1018.10 | 509.55          | 1001.07        | 501.04           | 1000.08        | 500.55           | 9  |
| 40 | 4133.61 | 2067.31         | 4116.58        | 2058.79          | 4115.59        | 2058.30          | E   | 888.99  | 445.00          | 871.95         | 436.48           | 870.97         | 435.99           | 8  |
| 41 | 4262.72 | 2131.87         | 4245.69        | 2123.35          | 4244.71        | 2122.86          | E   | 759.87  | 380.44          | 742.84         | 371.92           | 741.86         | 371.43           | 7  |
| 42 | 4333.80 | 2167.40         | 4316.77        | 2158.89          | 4315.79        | 2158.40          | A   | 630.76  | 315.88          | 613.73         | 307.37           | 612.74         | 306.87           | 6  |
| 43 | 4432.93 | 2216.97         | 4415.90        | 2208.45          | 4414.92        | 2207.96          | V   | 559.68  | 280.34          | 542.65         | 271.83           | 541.66         | 271.34           | 5  |
| 44 | 4534.04 | 2267.52         | 4517.01        | 2259.01          | 4516.02        | 2258.51          | T   | 460.55  | 230.78          | 443.52         | 222.26           | 442.53         | 221.77           | 4  |
| 45 | 4647.19 | 2324.10         | 4630.16        | 2315.59          | 4629.18        | 2315.09          | L   | 359.44  | 180.23          | 342.41         | 171.71           |                |                  | 3  |
| 46 | 4718.27 | 2359.64         | 4701.24        | 2351.12          | 4700.26        | 2350.63          | A   | 246.29  | 123.65          | 229.26         | 115.13           |                |                  | 2  |
| 47 |         |                 |                |                  |                |                  | R   | 175.21  | 88.11           | 158.18         | 79.59            |                |                  | 1  |



Gene Symbol  
TPM3

Sequences  
CTKEEHLCTQR

m/z  
737.07

Charge  
2+

Ion score  
75.3

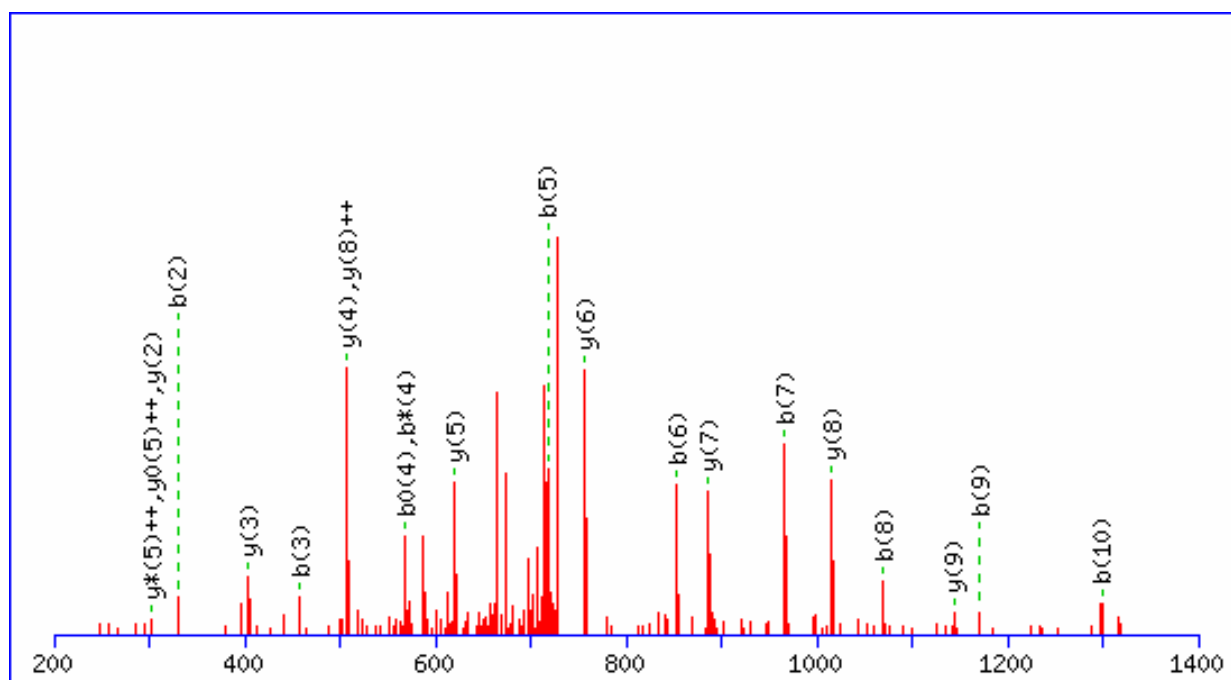

C1 : NEM (C)

| #  | b       | b <sup>++</sup> | b <sup>*</sup> | b <sup>+++</sup> | b <sup>0</sup> | b <sup>0++</sup> | Seq. | y       | y <sup>++</sup> | y <sup>*</sup> | y <sup>+++</sup> | y <sup>0</sup> | y <sup>0++</sup> | #  |
|----|---------|-----------------|----------------|------------------|----------------|------------------|------|---------|-----------------|----------------|------------------|----------------|------------------|----|
| 1  | 229.28  | 115.14          |                |                  |                |                  | C    |         |                 |                |                  |                |                  | 11 |
| 2  | 330.38  | 165.69          |                |                  | 312.36         | 156.69           | T    | 1245.39 | 623.20          | 1228.36        | 614.68           | 1227.37        | 614.19           | 10 |
| 3  | 458.55  | 229.78          | 441.52         | 221.26           | 440.54         | 220.77           | K    | 1144.28 | 572.65          | 1127.25        | 564.13           | 1126.27        | 563.64           | 9  |
| 4  | 587.67  | 294.34          | 570.64         | 285.82           | 569.65         | 285.33           | E    | 1016.11 | 508.56          | 999.08         | 500.04           | 998.09         | 499.55           | 8  |
| 5  | 716.78  | 358.89          | 699.75         | 350.38           | 698.77         | 349.89           | E    | 887.00  | 444.00          | 869.97         | 435.49           | 868.98         | 434.99           | 7  |
| 6  | 853.92  | 427.46          | 836.89         | 418.95           | 835.90         | 418.46           | H    | 757.88  | 379.44          | 740.85         | 370.93           | 739.87         | 370.44           | 6  |
| 7  | 967.08  | 484.04          | 950.05         | 475.53           | 949.06         | 475.03           | L    | 620.74  | 310.88          | 603.71         | 302.36           | 602.73         | 301.87           | 5  |
| 8  | 1070.22 | 535.61          | 1053.19        | 527.10           | 1052.20        | 526.61           | C    | 507.58  | 254.30          | 490.55         | 245.78           | 489.57         | 245.29           | 4  |
| 9  | 1171.32 | 586.17          | 1154.29        | 577.65           | 1153.31        | 577.16           | T    | 404.44  | 202.72          | 387.41         | 194.21           | 386.43         | 193.72           | 3  |
| 10 | 1299.45 | 650.23          | 1282.42        | 641.72           | 1281.44        | 641.22           | Q    | 303.34  | 152.17          | 286.31         | 143.66           |                |                  | 2  |
| 11 |         |                 |                |                  |                |                  | R    | 175.21  | 88.11           | 158.18         | 79.59            |                |                  | 1  |

Gene Symbol  
TUBA4A

Sequences  
AYHEQLSVAEITNA**C**FEFANQMVK

m/z  
898.89

Charge  
3+

Ion score  
57.4

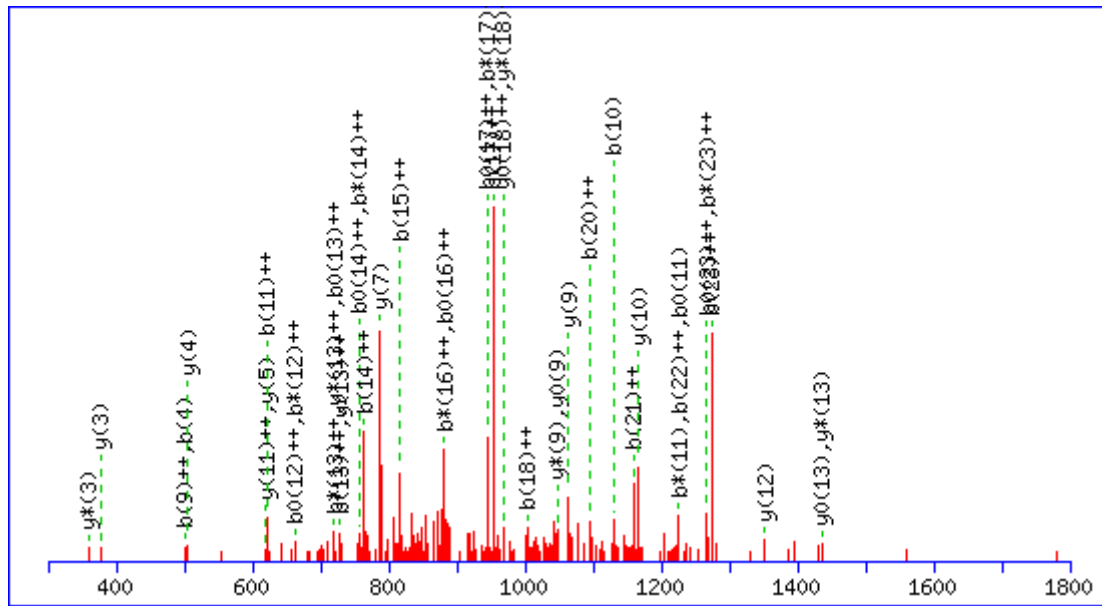

| #  | b              | b <sup>++</sup> | b <sup>*</sup> | b <sup>*++</sup> | b <sup>0</sup> | b <sup>0++</sup> | Seq. | y              | y <sup>++</sup> | y <sup>*</sup> | y <sup>*++</sup> | y <sup>0</sup> | y <sup>0++</sup> | #  |
|----|----------------|-----------------|----------------|------------------|----------------|------------------|------|----------------|-----------------|----------------|------------------|----------------|------------------|----|
| 1  | 72.09          | 36.55           |                |                  |                |                  | A    |                |                 |                |                  |                |                  | 24 |
| 2  | 235.26         | 118.13          |                |                  |                |                  | Y    | 2623.93        | 1312.47         | 2606.90        | 1303.96          | 2605.92        | 1303.46          | 23 |
| 3  | 372.40         | 186.70          |                |                  |                |                  | H    | 2460.76        | 1230.88         | 2443.73        | 1222.37          | 2442.75        | 1221.88          | 22 |
| 4  | <b>501.51</b>  | 251.26          |                |                  | 483.50         | 242.25           | E    | 2323.62        | 1162.31         | 2306.59        | 1153.80          | 2305.61        | 1153.31          | 21 |
| 5  | 629.64         | 315.32          | 612.61         | 306.81           | 611.63         | 306.32           | Q    | 2194.51        | 1097.76         | 2177.48        | 1089.24          | 2176.49        | 1088.75          | 20 |
| 6  | 742.80         | 371.90          | 725.77         | 363.39           | 724.78         | 362.90           | L    | 2066.38        | 1033.69         | 2049.35        | 1025.18          | 2048.36        | 1024.69          | 19 |
| 7  | 829.88         | 415.44          | 812.85         | 406.93           | 811.86         | 406.43           | S    | 1953.22        | 977.11          | 1936.19        | <b>968.60</b>    | 1935.21        | <b>968.11</b>    | 18 |
| 8  | 929.01         | 465.01          | 911.98         | 456.49           | 910.99         | 456.00           | V    | 1866.14        | 933.58          | 1849.11        | 925.06           | 1848.13        | 924.57           | 17 |
| 9  | 1000.09        | <b>500.55</b>   | 983.06         | 492.03           | 982.07         | 491.54           | A    | 1767.01        | 884.01          | 1749.98        | 875.49           | 1749.00        | 875.00           | 16 |
| 10 | <b>1129.20</b> | 565.10          | 1112.17        | 556.59           | 1111.18        | 556.10           | E    | 1695.93        | 848.47          | 1678.90        | 839.96           | 1677.92        | 839.46           | 15 |
| 11 | 1242.36        | <b>621.68</b>   | <b>1225.33</b> | 613.17           | <b>1224.34</b> | 612.67           | I    | 1566.82        | 783.91          | 1549.79        | 775.40           | 1548.81        | 774.91           | 14 |
| 12 | 1343.46        | 672.23          | 1326.43        | <b>663.72</b>    | 1325.45        | <b>663.23</b>    | T    | 1453.66        | <b>727.34</b>   | <b>1436.63</b> | <b>718.82</b>    | <b>1435.65</b> | 718.33           | 13 |
| 13 | 1457.56        | <b>729.29</b>   | 1440.53        | <b>720.77</b>    | 1439.55        | <b>720.28</b>    | N    | <b>1352.56</b> | 676.78          | 1335.53        | 668.27           | 1334.54        | 667.78           | 12 |
| 14 | 1528.64        | <b>764.82</b>   | 1511.61        | <b>756.31</b>    | 1510.63        | <b>755.82</b>    | A    | 1238.46        | <b>619.73</b>   | 1221.43        | 611.22           | 1220.44        | 610.72           | 11 |
| 15 | 1631.78        | <b>816.40</b>   | 1614.75        | 807.88           | 1613.77        | 807.39           | C    | <b>1167.38</b> | 584.19          | 1150.35        | 575.68           | 1149.36        | 575.19           | 10 |
| 16 | 1778.96        | 889.98          | 1761.93        | <b>881.47</b>    | 1760.94        | <b>880.98</b>    | F    | <b>1064.24</b> | 532.62          | <b>1047.21</b> | 524.11           | <b>1046.22</b> | 523.61           | 9  |
| 17 | 1908.07        | <b>954.54</b>   | 1891.04        | <b>946.02</b>    | 1890.06        | <b>945.53</b>    | E    | 917.06         | 459.03          | 900.03         | 450.52           | 899.05         | 450.03           | 8  |
| 18 | 2005.19        | <b>1003.10</b>  | 1988.16        | 994.58           | 1987.17        | 994.09           | P    | <b>787.95</b>  | 394.48          | 770.92         | 385.96           |                |                  | 7  |
| 19 | 2076.27        | 1038.64         | 2059.23        | 1030.12          | 2058.25        | 1029.63          | A    | 690.83         | 345.92          | 673.80         | 337.40           |                |                  | 6  |
| 20 | 2190.37        | <b>1095.69</b>  | 2173.34        | 1087.17          | 2172.35        | 1086.68          | N    | <b>619.75</b>  | 310.38          | 602.72         | 301.87           |                |                  | 5  |
| 21 | 2318.50        | <b>1159.75</b>  | 2301.47        | 1151.24          | 2300.48        | 1150.74          | Q    | <b>505.65</b>  | 253.33          | 488.62         | 244.81           |                |                  | 4  |
| 22 | 2449.69        | <b>1225.35</b>  | 2432.66        | 1216.84          | 2431.68        | 1216.34          | M    | <b>377.52</b>  | 189.27          | <b>360.49</b>  | 180.75           |                |                  | 3  |
| 23 | 2548.82        | <b>1274.92</b>  | 2531.79        | <b>1266.40</b>   | 2530.81        | <b>1265.91</b>   | V    | 246.33         | 123.67          | 229.30         | 115.15           |                |                  | 2  |
| 24 |                |                 |                |                  |                |                  | K    | 147.20         | 74.10           | 130.17         | 65.59            |                |                  | 1  |

Gene Symbol  
UGCG

Sequences  
LRGGTAEELD~~V~~

m/z  
688.50

Charge  
2+

Ion score  
55.8

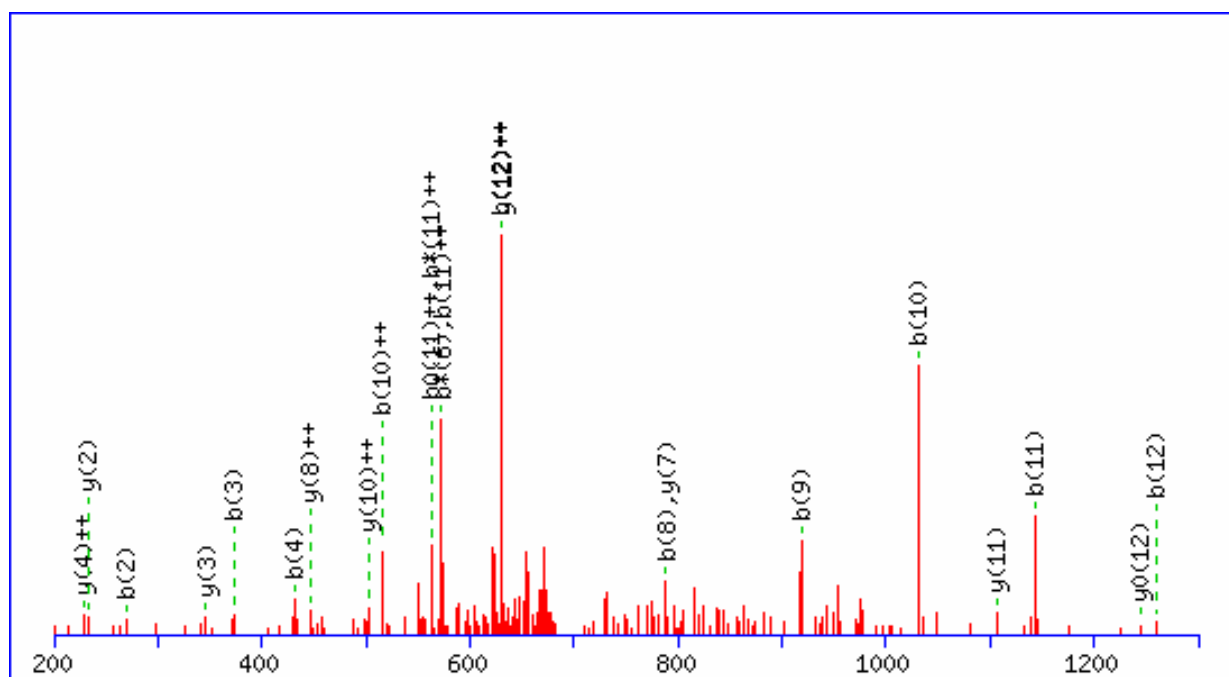

| #  | b              | b <sup>++</sup> | b <sup>*</sup> | b <sup>+++</sup> | b <sup>0</sup> | b <sup>0++</sup> | Seq. | y              | y <sup>++</sup> | y <sup>*</sup> | y <sup>+++</sup> | y <sup>0</sup> | y <sup>0++</sup> | #  |
|----|----------------|-----------------|----------------|------------------|----------------|------------------|------|----------------|-----------------|----------------|------------------|----------------|------------------|----|
| 1  | 114.17         | 57.59           |                |                  |                |                  | L    |                |                 |                |                  |                |                  | 13 |
| 2  | <b>270.35</b>  | 135.68          | 253.32         | 127.16           |                |                  | R    | 1263.40        | <b>632.20</b>   | 1246.37        | 623.69           | <b>1245.38</b> | 623.20           | 12 |
| 3  | <b>373.49</b>  | 187.25          | 356.46         | 178.74           |                |                  | C    | <b>1107.21</b> | 554.11          |                |                  | 1089.20        | 545.10           | 11 |
| 4  | <b>430.55</b>  | 215.78          | 413.51         | 207.26           |                |                  | G    | 1004.07        | <b>502.54</b>   |                |                  | 986.05         | 493.53           | 10 |
| 5  | 487.60         | 244.30          | 470.57         | 235.79           |                |                  | G    | 947.02         | 474.01          |                |                  | 929.00         | 465.01           | 9  |
| 6  | 588.70         | 294.85          | <b>571.67</b>  | 286.34           | 570.69         | 285.85           | T    | 889.97         | <b>445.49</b>   |                |                  | 871.95         | 436.48           | 8  |
| 7  | 659.78         | 330.39          | 642.75         | 321.88           | 641.76         | 321.39           | A    | <b>788.86</b>  | 394.94          |                |                  | 770.85         | 385.93           | 7  |
| 8  | <b>788.89</b>  | 394.95          | 771.86         | 386.43           | 770.88         | 385.94           | E    | 717.78         | 359.40          |                |                  | 699.77         | 350.39           | 6  |
| 9  | <b>918.01</b>  | 459.51          | 900.98         | 450.99           | 899.99         | 450.50           | E    | 588.67         | 294.84          |                |                  | 570.66         | 285.83           | 5  |
| 10 | <b>1031.16</b> | <b>516.09</b>   | 1014.13        | 507.57           | 1013.15        | 507.08           | I    | 459.56         | <b>230.28</b>   |                |                  | 441.54         | 221.27           | 4  |
| 11 | <b>1144.32</b> | <b>572.66</b>   | 1127.29        | <b>564.15</b>    | 1126.31        | <b>563.66</b>    | L    | <b>346.40</b>  | 173.70          |                |                  | 328.38         | 164.70           | 3  |
| 12 | <b>1259.41</b> | <b>630.21</b>   | 1242.38        | 621.69           | 1241.39        | 621.20           | D    | <b>233.24</b>  | 117.12          |                |                  | 215.23         | 108.12           | 2  |
| 13 |                |                 |                |                  |                |                  | V    | 118.15         | 59.58           |                |                  |                |                  | 1  |

Gene Symbol  
VAPA

Sequences  
CVFEMPNDKLNDEMPK

m/z  
1120.68

Charge  
2+

Ion score  
51.4

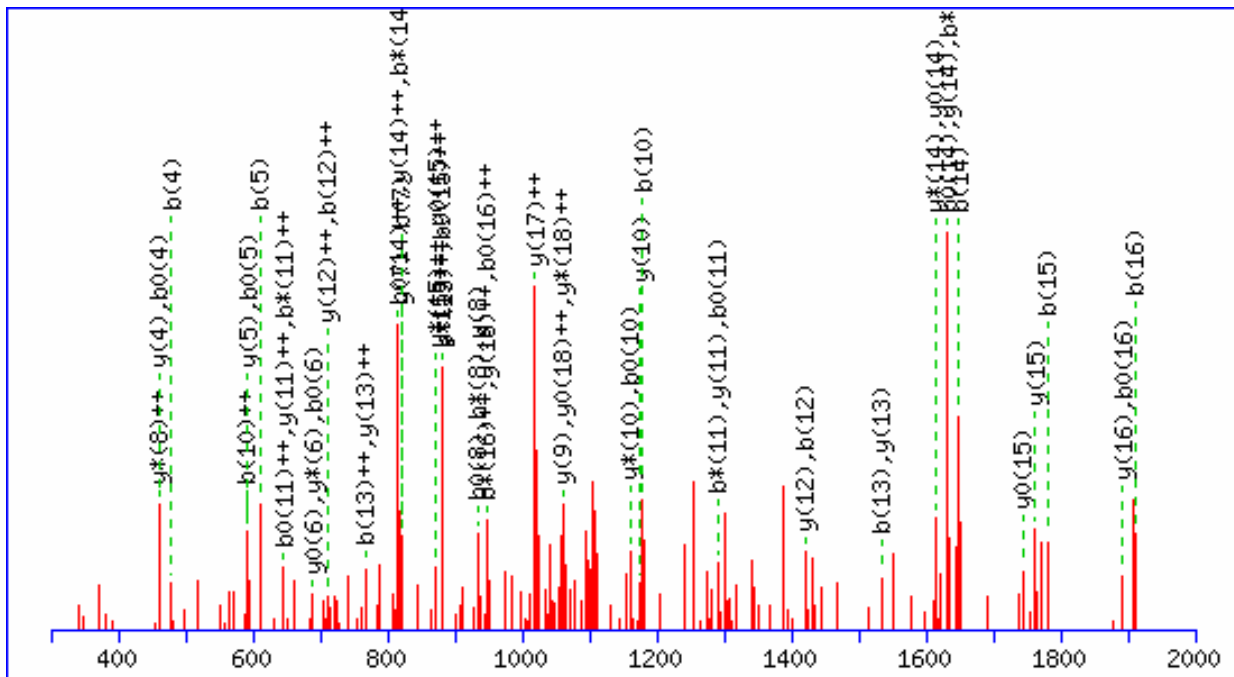

| #  | b       | b <sup>++</sup> | b <sup>+</sup> | b <sup>+++</sup> | b <sup>0</sup> | b <sup>0++</sup> | Seq. | y       | y <sup>++</sup> | y <sup>+</sup> | y <sup>+++</sup> | y <sup>0</sup> | y <sup>0++</sup> | #  |
|----|---------|-----------------|----------------|------------------|----------------|------------------|------|---------|-----------------|----------------|------------------|----------------|------------------|----|
| 1  | 104.15  | 52.58           |                |                  |                |                  | C    |         |                 |                |                  |                |                  | 19 |
| 2  | 203.28  | 102.14          |                |                  |                |                  | V    | 2138.35 | 1069.68         | 2121.32        | 1061.17          | 2120.34        | 1060.67          | 18 |
| 3  | 350.46  | 175.73          |                |                  |                |                  | F    | 2039.22 | 1020.12         | 2022.19        | 1011.60          | 2021.21        | 1011.11          | 17 |
| 4  | 479.57  | 240.29          |                |                  | 461.55         | 231.28           | E    | 1892.05 | 946.53          | 1875.02        | 938.01           | 1874.03        | 937.52           | 16 |
| 5  | 610.77  | 305.89          |                |                  | 592.75         | 296.88           | M    | 1762.94 | 881.97          | 1745.91        | 873.46           | 1744.92        | 872.96           | 15 |
| 6  | 707.88  | 354.44          |                |                  | 689.87         | 345.44           | P    | 1631.74 | 816.37          | 1614.71        | 807.86           | 1613.72        | 807.37           | 14 |
| 7  | 821.98  | 411.50          | 804.95         | 402.98           | 803.97         | 402.49           | N    | 1534.62 | 767.82          | 1517.59        | 759.30           | 1516.61        | 758.81           | 13 |
| 8  | 951.10  | 476.05          | 934.07         | 467.54           | 933.08         | 467.05           | E    | 1420.52 | 710.76          | 1403.49        | 702.25           | 1402.51        | 701.76           | 12 |
| 9  | 1065.20 | 533.10          | 1048.17        | 524.59           | 1047.19        | 524.10           | N    | 1291.41 | 646.21          | 1274.38        | 637.69           | 1273.39        | 637.20           | 11 |
| 10 | 1180.29 | 590.65          | 1163.26        | 582.13           | 1162.27        | 581.64           | D    | 1177.31 | 589.16          | 1160.27        | 580.64           | 1159.29        | 580.15           | 10 |
| 11 | 1308.46 | 654.73          | 1291.43        | 646.22           | 1290.44        | 645.73           | K    | 1062.22 | 531.61          | 1045.19        | 523.10           | 1044.20        | 522.61           | 9  |
| 12 | 1421.62 | 711.31          | 1404.59        | 702.80           | 1403.60        | 702.31           | L    | 934.05  | 467.53          | 917.02         | 459.01           | 916.03         | 458.52           | 8  |
| 13 | 1535.72 | 768.36          | 1518.69        | 759.85           | 1517.70        | 759.36           | N    | 820.89  | 410.95          | 803.86         | 402.43           | 802.87         | 401.94           | 7  |
| 14 | 1650.81 | 825.91          | 1633.78        | 817.39           | 1632.79        | 816.90           | D    | 706.79  | 353.90          | 689.76         | 345.38           | 688.77         | 344.89           | 6  |
| 15 | 1782.00 | 891.51          | 1764.97        | 882.99           | 1763.99        | 882.50           | M    | 591.70  | 296.35          | 574.67         | 287.84           | 573.68         | 287.35           | 5  |
| 16 | 1911.12 | 956.06          | 1894.09        | 947.55           | 1893.10        | 947.06           | E    | 460.50  | 230.75          | 443.47         | 222.24           | 442.49         | 221.75           | 4  |
| 17 | 2008.23 | 1004.62         | 1991.20        | 996.11           | 1990.22        | 995.61           | P    | 331.39  | 166.20          | 314.36         | 157.68           | 313.37         | 157.19           | 3  |
| 18 | 2095.31 | 1048.16         | 2078.28        | 1039.64          | 2077.29        | 1039.15          | S    | 234.27  | 117.64          | 217.24         | 109.13           | 216.26         | 108.63           | 2  |
| 19 |         |                 |                |                  |                |                  | K    | 147.20  | 74.10           | 130.17         | 65.59            |                |                  | 1  |

Gene Symbol YES1 Sequences YRPENTPEPVSTSVSHYGAEPITVSPCPSSSAK m/z 1155.97 Charge 3+ Ion score 91.8

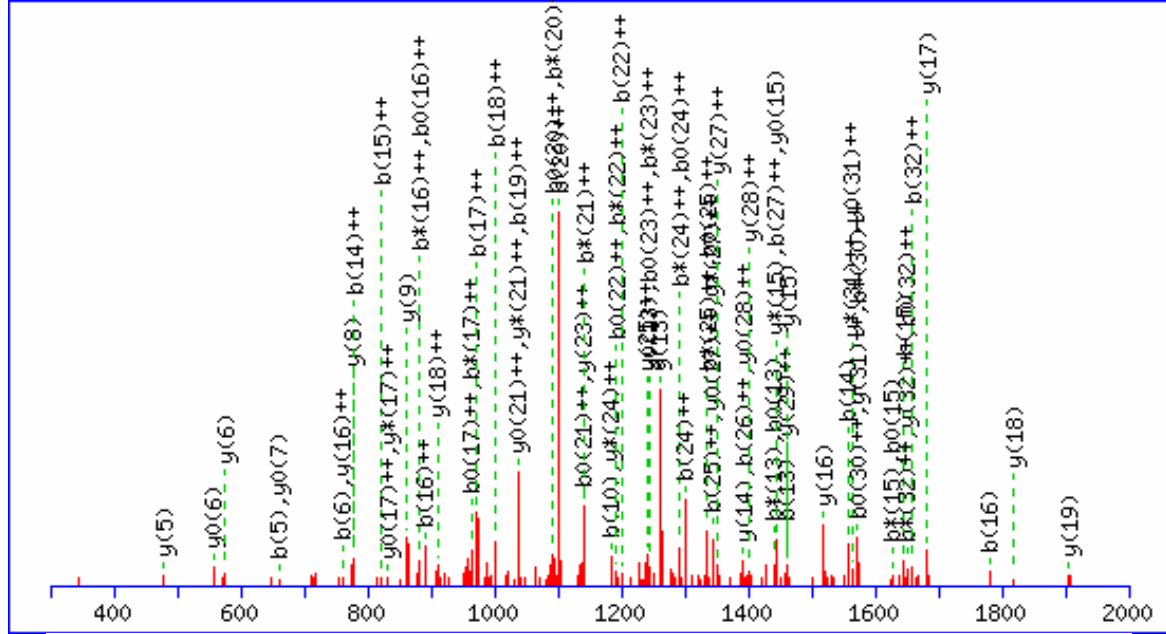

| #  | b       | b <sup>++</sup> | b <sup>+</sup> | b <sup>+++</sup> | b <sup>0</sup> | b <sup>0++</sup> | Seq. | y       | y <sup>+</sup> | y <sup>+</sup> | y <sup>++</sup> | y <sup>0</sup> | y <sup>0++</sup> | #  |
|----|---------|-----------------|----------------|------------------|----------------|------------------|------|---------|----------------|----------------|-----------------|----------------|------------------|----|
| 1  | 164.18  | 82.59           |                |                  |                |                  | Y    |         |                |                |                 |                |                  | 33 |
| 2  | 320.37  | 160.69          | 303.34         | 152.17           |                |                  | R    | 3301.53 | 1651.27        | 3284.50        | 1642.75         | 3283.51        | 1642.26          | 32 |
| 3  | 417.48  | 209.25          | 400.45         | 200.73           |                |                  | P    | 3145.34 | 1573.18        | 3128.31        | 1564.66         | 3127.33        | 1564.17          | 31 |
| 4  | 546.60  | 273.80          | 529.57         | 265.29           | 528.58         | 264.79           | E    | 3048.23 | 1524.62        | 3031.20        | 1516.10         | 3030.21        | 1515.61          | 30 |
| 5  | 660.70  | 330.85          | 643.67         | 322.34           | 642.68         | 321.85           | N    | 2919.11 | 1460.06        | 2902.08        | 1451.55         | 2901.10        | 1451.05          | 29 |
| 6  | 761.80  | 381.41          | 744.77         | 372.89           | 743.79         | 372.40           | T    | 2805.01 | 1403.01        | 2787.98        | 1394.49         | 2787.00        | 1394.00          | 28 |
| 7  | 858.92  | 429.96          | 841.89         | 421.45           | 840.90         | 420.96           | P    | 2703.91 | 1352.46        | 2686.88        | 1343.94         | 2685.89        | 1343.45          | 27 |
| 8  | 988.03  | 494.52          | 971.00         | 486.00           | 970.02         | 485.51           | E    | 2606.79 | 1303.90        | 2589.76        | 1295.39         | 2588.78        | 1294.89          | 26 |
| 9  | 1085.15 | 543.08          | 1068.12        | 534.56           | 1067.13        | 534.07           | P    | 2477.68 | 1239.34        | 2460.65        | 1230.83         | 2459.66        | 1230.34          | 25 |
| 10 | 1184.28 | 592.64          | 1167.25        | 584.13           | 1166.26        | 583.64           | V    | 2380.56 | 1190.79        | 2363.53        | 1182.27         | 2362.55        | 1181.78          | 24 |
| 11 | 1271.36 | 636.18          | 1254.32        | 627.67           | 1253.34        | 627.17           | S    | 2281.43 | 1141.22        | 2264.40        | 1132.71         | 2263.42        | 1132.21          | 23 |
| 12 | 1372.46 | 686.73          | 1355.43        | 678.22           | 1354.44        | 677.73           | T    | 2194.36 | 1097.68        | 2177.32        | 1089.17         | 2176.34        | 1088.67          | 22 |
| 13 | 1459.54 | 730.27          | 1442.51        | 721.76           | 1441.52        | 721.26           | S    | 2093.25 | 1047.13        | 2076.22        | 1038.61         | 2075.24        | 1038.12          | 21 |
| 14 | 1558.67 | 779.84          | 1541.64        | 771.32           | 1540.65        | 770.83           | V    | 2006.17 | 1003.59        | 1989.14        | 995.08          | 1988.16        | 994.58           | 20 |
| 15 | 1645.75 | 823.38          | 1628.71        | 814.86           | 1627.73        | 814.37           | S    | 1907.04 | 954.03         | 1890.01        | 945.51          | 1889.03        | 945.02           | 19 |
| 16 | 1782.88 | 891.95          | 1765.85        | 883.43           | 1764.87        | 882.94           | H    | 1819.97 | 910.49         | 1802.94        | 901.97          | 1801.95        | 901.48           | 18 |
| 17 | 1946.06 | 973.53          | 1929.03        | 965.02           | 1928.04        | 964.53           | Y    | 1682.83 | 841.92         | 1665.80        | 833.40          | 1664.81        | 832.91           | 17 |
| 18 | 2003.11 | 1002.06         | 1986.08        | 993.54           | 1985.09        | 993.05           | G    | 1519.65 | 760.33         | 1502.62        | 751.82          | 1501.64        | 751.32           | 16 |
| 19 | 2074.19 | 1037.60         | 2057.16        | 1029.08          | 2056.17        | 1028.59          | A    | 1462.60 | 731.80         | 1445.57        | 723.29          | 1444.59        | 722.80           | 15 |
| 20 | 2203.30 | 1102.15         | 2186.27        | 1093.64          | 2185.29        | 1093.15          | E    | 1391.52 | 696.27         | 1374.49        | 687.75          | 1373.51        | 687.26           | 14 |
| 21 | 2300.42 | 1150.71         | 2283.39        | 1142.20          | 2282.40        | 1141.70          | P    | 1262.41 | 631.71         | 1245.38        | 623.19          | 1244.39        | 622.70           | 13 |
| 22 | 2401.52 | 1201.26         | 2384.49        | 1192.75          | 2383.50        | 1192.26          | T    | 1165.29 | 583.15         | 1148.26        | 574.64          | 1147.28        | 574.14           | 12 |
| 23 | 2502.62 | 1251.82         | 2485.59        | 1243.30          | 2484.61        | 1242.81          | T    | 1064.19 | 532.60         | 1047.16        | 524.08          | 1046.18        | 523.59           | 11 |
| 24 | 2601.75 | 1301.38         | 2584.72        | 1292.87          | 2583.74        | 1292.37          | V    | 963.09  | 482.05         | 946.06         | 473.53          | 945.07         | 473.04           | 10 |
| 25 | 2688.83 | 1344.92         | 2671.80        | 1336.40          | 2670.82        | 1335.91          | S    | 863.96  | 432.48         | 846.93         | 423.97          | 845.94         | 423.47           | 9  |
| 26 | 2785.95 | 1393.48         | 2768.92        | 1384.96          | 2767.93        | 1384.47          | P    | 776.88  | 388.94         | 759.85         | 380.43          | 758.86         | 379.94           | 8  |
| 27 | 2889.09 | 1445.05         | 2872.06        | 1436.53          | 2871.08        | 1436.04          | C    | 679.76  | 340.39         | 662.73         | 331.87          | 661.75         | 331.38           | 7  |
| 28 | 2986.21 | 1493.61         | 2969.18        | 1485.09          | 2968.19        | 1484.60          | P    | 576.62  | 288.81         | 559.59         | 280.30          | 558.61         | 279.81           | 6  |
| 29 | 3073.28 | 1537.15         | 3056.25        | 1528.63          | 3055.27        | 1528.14          | S    | 479.51  | 240.26         | 462.47         | 231.74          | 461.49         | 231.25           | 5  |
| 30 | 3160.36 | 1580.68         | 3143.33        | 1572.17          | 3142.34        | 1571.68          | S    | 392.43  | 196.72         | 375.40         | 188.20          | 374.41         | 187.71           | 4  |
| 31 | 3247.44 | 1624.22         | 3230.41        | 1615.71          | 3229.42        | 1615.22          | S    | 305.35  | 153.18         | 288.32         | 144.66          | 287.34         | 144.17           | 3  |
| 32 | 3318.52 | 1659.76         | 3301.48        | 1651.25          | 3300.50        | 1650.75          | A    | 218.27  | 109.64         | 201.24         | 101.13          |                |                  | 2  |
| 33 |         |                 |                |                  |                |                  | K    | 147.20  | 74.10          | 130.17         | 65.59           |                |                  | 1  |

Gene Symbol YTHDC2 Sequences MSRPSSVSPRPAPGGGGGGGPPSPCGPGGGGR m/z 709.91 Charge 4+ Ion score 44.6

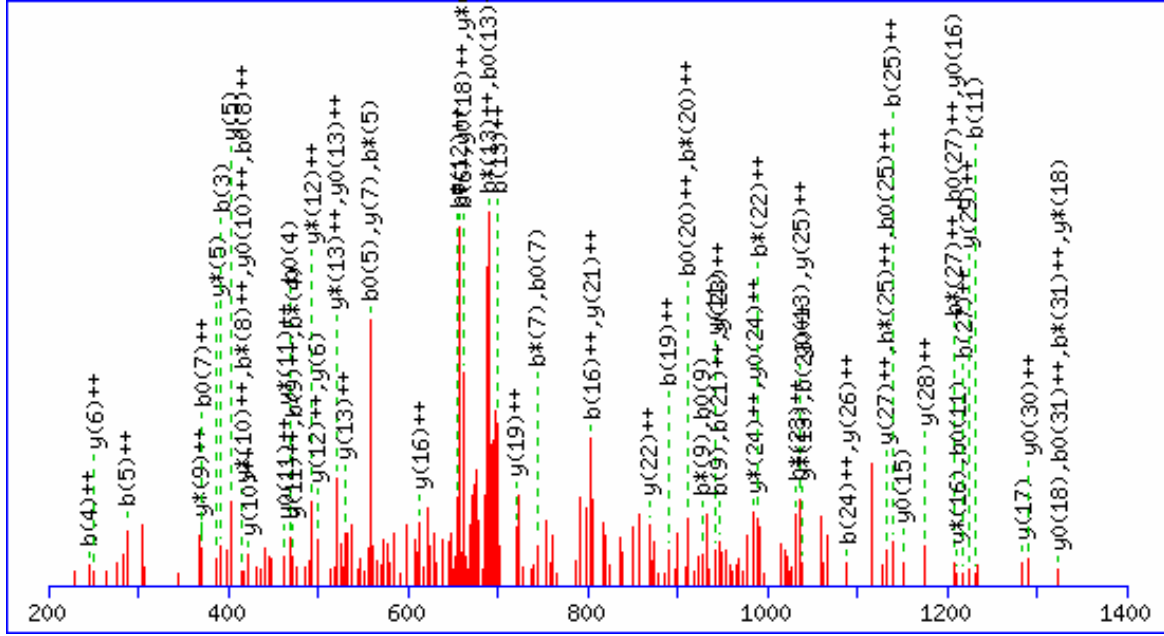

M1 : Oxidation (M)

| #  | b       | b <sup>++</sup> | b <sup>+</sup> | b <sup>+++</sup> | b <sup>0</sup> | b <sup>0++</sup> | Seq. | y       | y <sup>++</sup> | y <sup>+</sup> | y <sup>+++</sup> | y <sup>0</sup> | y <sup>0++</sup> | #  |
|----|---------|-----------------|----------------|------------------|----------------|------------------|------|---------|-----------------|----------------|------------------|----------------|------------------|----|
| 1  | 148.20  | 74.61           |                |                  |                |                  | M    |         |                 |                |                  |                |                  | 32 |
| 2  | 235.28  | 118.14          |                |                  | 217.27         | 109.14           | S    | 2688.87 | 1344.94         | 2671.84        | 1336.42          | 2670.85        | 1335.93          | 31 |
| 3  | 391.47  | 196.24          | 374.44         | 187.72           | 373.45         | 187.23           | R    | 2601.79 | 1301.40         | 2584.76        | 1292.89          | 2583.78        | 1292.39          | 30 |
| 4  | 488.58  | 244.79          | 471.55         | 236.28           | 470.57         | 235.79           | P    | 2445.61 | 1223.31         | 2428.58        | 1214.79          | 2427.59        | 1214.30          | 29 |
| 5  | 575.66  | 288.33          | 558.63         | 279.82           | 557.64         | 279.33           | S    | 2348.49 | 1174.75         | 2331.46        | 1166.23          | 2330.48        | 1165.74          | 28 |
| 6  | 662.74  | 331.87          | 645.71         | 323.36           | 644.72         | 322.86           | S    | 2261.41 | 1131.21         | 2244.38        | 1122.70          | 2243.40        | 1122.20          | 27 |
| 7  | 761.87  | 381.44          | 744.84         | 372.92           | 743.85         | 372.43           | V    | 2174.34 | 1087.67         | 2157.31        | 1079.16          | 2156.32        | 1078.66          | 26 |
| 8  | 848.94  | 424.98          | 831.91         | 416.46           | 830.93         | 415.97           | S    | 2075.21 | 1038.11         | 2058.18        | 1029.59          | 2057.19        | 1029.10          | 25 |
| 9  | 946.06  | 473.53          | 929.03         | 465.02           | 928.04         | 464.53           | P    | 1988.13 | 994.57          | 1971.10        | 986.05           | 1970.11        | 985.56           | 24 |
| 10 | 1102.25 | 551.63          | 1085.22        | 543.11           | 1084.23        | 542.62           | R    | 1891.01 | 946.01          | 1873.98        | 937.50           | 1873.00        | 937.00           | 23 |
| 11 | 1230.37 | 615.69          | 1213.34        | 607.18           | 1212.36        | 606.68           | Q    | 1734.83 | 867.92          | 1717.80        | 859.40           | 1716.81        | 858.91           | 22 |
| 12 | 1327.49 | 664.25          | 1310.46        | 655.73           | 1309.47        | 655.24           | P    | 1606.70 | 803.85          | 1589.67        | 795.34           | 1588.68        | 794.85           | 21 |
| 13 | 1398.57 | 699.79          | 1381.54        | 691.27           | 1380.55        | 690.78           | A    | 1509.58 | 755.30          | 1492.55        | 746.78           | 1491.57        | 746.29           | 20 |
| 14 | 1495.68 | 748.35          | 1478.65        | 739.83           | 1477.67        | 739.34           | P    | 1438.51 | 719.76          | 1421.48        | 711.24           | 1420.49        | 710.75           | 19 |
| 15 | 1552.73 | 776.87          | 1535.70        | 768.36           | 1534.72        | 767.86           | G    | 1341.39 | 671.20          | 1324.36        | 662.68           | 1323.38        | 662.19           | 18 |
| 16 | 1609.79 | 805.40          | 1592.76        | 796.88           | 1591.77        | 796.39           | G    | 1284.34 | 642.67          | 1267.31        | 634.16           | 1266.32        | 633.67           | 17 |
| 17 | 1666.84 | 833.92          | 1649.81        | 825.41           | 1648.82        | 824.91           | G    | 1227.29 | 614.15          | 1210.26        | 605.63           | 1209.27        | 605.14           | 16 |
| 18 | 1723.89 | 862.45          | 1706.86        | 853.93           | 1705.87        | 853.44           | G    | 1170.24 | 585.62          | 1153.21        | 577.11           | 1152.22        | 576.61           | 15 |
| 19 | 1780.94 | 890.97          | 1763.91        | 882.46           | 1762.92        | 881.97           | G    | 1113.19 | 557.10          | 1096.15        | 548.58           | 1095.17        | 548.09           | 14 |
| 20 | 1837.99 | 919.50          | 1820.96        | 910.98           | 1819.98        | 910.49           | G    | 1056.13 | 528.57          | 1039.10        | 520.06           | 1038.12        | 519.56           | 13 |
| 21 | 1895.04 | 948.03          | 1878.01        | 939.51           | 1877.03        | 939.02           | G    | 999.08  | 500.05          | 982.05         | 491.53           | 981.07         | 491.04           | 12 |
| 22 | 1992.16 | 996.58          | 1975.13        | 988.07           | 1974.14        | 987.58           | P    | 942.03  | 471.52          | 925.00         | 463.00           | 924.02         | 462.51           | 11 |
| 23 | 2079.23 | 1040.12         | 2062.20        | 1031.61          | 2061.22        | 1031.11          | S    | 844.92  | 422.96          | 827.89         | 414.45           | 826.90         | 413.95           | 10 |
| 24 | 2176.35 | 1088.68         | 2159.32        | 1080.16          | 2158.33        | 1079.67          | P    | 757.84  | 379.42          | 740.81         | 370.91           |                |                  | 9  |
| 25 | 2279.49 | 1140.25         | 2262.46        | 1131.74          | 2261.48        | 1131.24          | C    | 660.72  | 330.87          | 643.69         | 322.35           |                |                  | 8  |
| 26 | 2336.54 | 1168.78         | 2319.51        | 1160.26          | 2318.53        | 1159.77          | G    | 557.58  | 279.29          | 540.55         | 270.78           |                |                  | 7  |
| 27 | 2433.66 | 1217.33         | 2416.63        | 1208.82          | 2415.64        | 1208.33          | P    | 500.53  | 250.77          | 483.50         | 242.25           |                |                  | 6  |
| 28 | 2490.71 | 1245.86         | 2473.68        | 1237.34          | 2472.70        | 1236.85          | G    | 403.41  | 202.21          | 386.38         | 193.70           |                |                  | 5  |
| 29 | 2547.76 | 1274.38         | 2530.73        | 1265.87          | 2529.75        | 1265.38          | G    | 346.36  | 173.69          | 329.33         | 165.17           |                |                  | 4  |
| 30 | 2604.81 | 1302.91         | 2587.78        | 1294.40          | 2586.80        | 1293.90          | G    | 289.31  | 145.16          | 272.28         | 136.64           |                |                  | 3  |
| 31 | 2661.86 | 1331.44         | 2644.83        | 1322.92          | 2643.85        | 1322.43          | G    | 232.26  | 116.63          | 215.23         | 108.12           |                |                  | 2  |
| 32 |         |                 |                |                  |                |                  | R    | 175.21  | 88.11           | 158.18         | 79.59            |                |                  | 1  |

Gene Symbol  
ZDHHC5

Sequences  
FRGGVNPFTNG**C**CNNVSR

m/z  
689.76

Charge  
3+

Ion score  
58.4

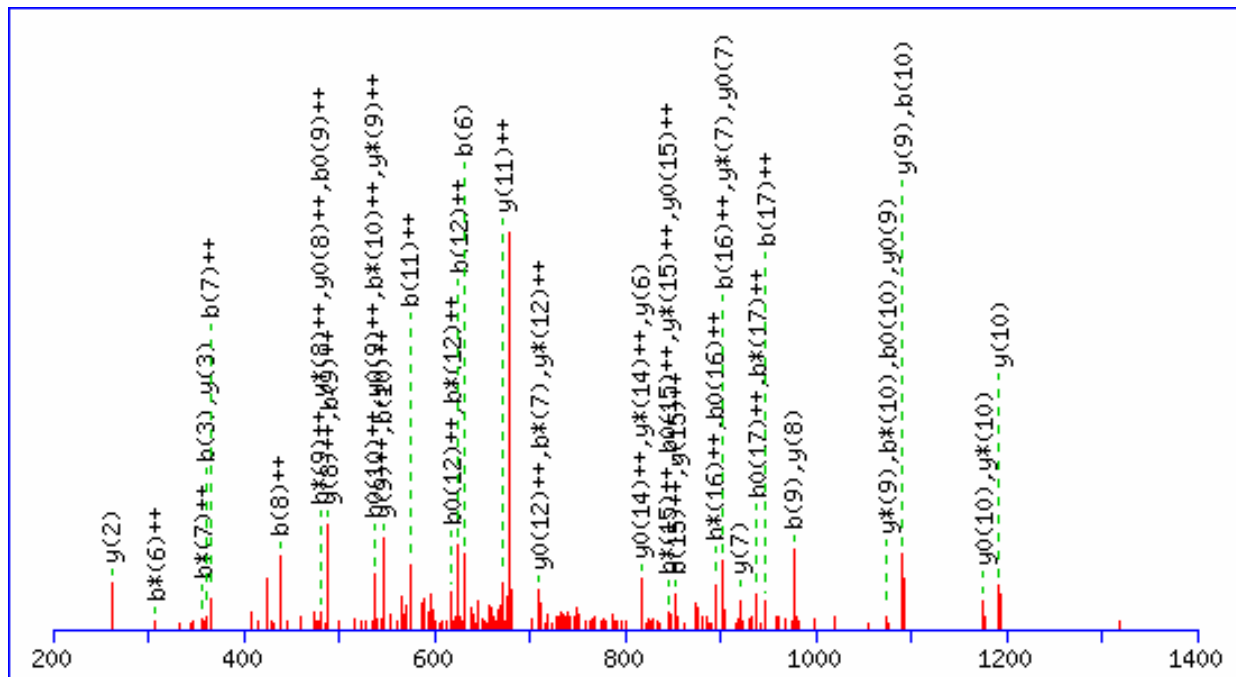

**C13 : NEM (C)**

| #  | b              | b <sup>++</sup> | b <sup>*</sup> | b <sup>+++</sup> | b <sup>0</sup> | b <sup>0++</sup> | Seq. | y              | y <sup>++</sup> | y <sup>*</sup> | y <sup>+++</sup> | y <sup>0</sup> | y <sup>0++</sup> | #  |
|----|----------------|-----------------|----------------|------------------|----------------|------------------|------|----------------|-----------------|----------------|------------------|----------------|------------------|----|
| 1  | 148.18         | 74.59           |                |                  |                |                  | F    |                |                 |                |                  |                |                  | 18 |
| 2  | 304.37         | 152.69          | 287.34         | 144.17           |                |                  | R    | 1921.10        | 961.06          | 1904.07        | 952.54           | 1903.09        | 952.05           | 17 |
| 3  | <b>361.42</b>  | 181.21          | 344.39         | 172.70           |                |                  | G    | 1764.92        | 882.96          | 1747.89        | 874.45           | 1746.90        | 873.95           | 16 |
| 4  | 418.47         | 209.74          | 401.44         | 201.22           |                |                  | G    | 1707.87        | <b>854.44</b>   | 1690.84        | <b>845.92</b>    | 1689.85        | <b>845.43</b>    | 15 |
| 5  | 517.60         | 259.30          | 500.57         | 250.79           |                |                  | V    | 1650.81        | 825.91          | 1633.78        | <b>817.40</b>    | 1632.80        | <b>816.90</b>    | 14 |
| 6  | <b>631.70</b>  | 316.36          | 614.67         | <b>307.84</b>    |                |                  | N    | 1551.68        | 776.35          | 1534.65        | 767.83           | 1533.67        | 767.34           | 13 |
| 7  | 728.82         | <b>364.91</b>   | <b>711.79</b>  | <b>356.40</b>    |                |                  | P    | 1437.58        | 719.29          | 1420.55        | <b>710.78</b>    | 1419.57        | <b>710.29</b>    | 12 |
| 8  | 875.99         | <b>438.50</b>   | 858.96         | 429.99           |                |                  | F    | 1340.47        | <b>670.74</b>   | 1323.43        | 662.22           | 1322.45        | 661.73           | 11 |
| 9  | <b>977.10</b>  | <b>489.05</b>   | 960.07         | <b>480.54</b>    | 959.08         | <b>480.04</b>    | T    | <b>1193.29</b> | 597.15          | <b>1176.26</b> | 588.63           | <b>1175.28</b> | 588.14           | 10 |
| 10 | <b>1091.20</b> | <b>546.10</b>   | <b>1074.17</b> | <b>537.59</b>    | <b>1073.18</b> | <b>537.10</b>    | N    | <b>1092.19</b> | <b>546.60</b>   | <b>1075.16</b> | <b>538.08</b>    | <b>1074.17</b> | <b>537.59</b>    | 9  |
| 11 | 1148.25        | <b>574.63</b>   | 1131.22        | 566.11           | 1130.24        | 565.62           | G    | <b>978.08</b>  | <b>489.55</b>   | 961.05         | <b>481.03</b>    | 960.07         | <b>480.54</b>    | 8  |
| 12 | 1251.39        | <b>626.20</b>   | 1234.36        | <b>617.69</b>    | 1233.38        | <b>617.19</b>    | C    | <b>921.03</b>  | 461.02          | <b>904.00</b>  | 452.51           | <b>903.02</b>  | 452.01           | 7  |
| 13 | 1479.66        | 740.33          | 1462.63        | 731.82           | 1461.65        | 731.33           | C    | <b>817.89</b>  | 409.45          | 800.86         | 400.93           | 799.88         | 400.44           | 6  |
| 14 | 1593.76        | 797.39          | 1576.73        | 788.87           | 1575.75        | 788.38           | N    | 589.62         | 295.32          | 572.59         | 286.80           | 571.61         | 286.31           | 5  |
| 15 | 1707.87        | <b>854.44</b>   | 1690.84        | <b>845.92</b>    | 1689.85        | <b>845.43</b>    | N    | 475.52         | 238.26          | 458.49         | 229.75           | 457.50         | 229.26           | 4  |
| 16 | 1807.00        | <b>904.00</b>   | 1789.97        | <b>895.49</b>    | 1788.98        | <b>895.00</b>    | V    | <b>361.42</b>  | 181.21          | 344.39         | 172.70           | 343.40         | 172.20           | 3  |
| 17 | 1894.08        | <b>947.54</b>   | 1877.04        | <b>939.03</b>    | 1876.06        | <b>938.53</b>    | S    | <b>262.29</b>  | 131.65          | 245.26         | 123.13           | 244.27         | 122.64           | 2  |
| 18 |                |                 |                |                  |                |                  | R    | 175.21         | 88.11           | 158.18         | 79.59            |                |                  | 1  |

Gene Symbol  
ZDHC5

Sequences  
GGVNPFTNG**C**CNNVSR

m/z  
820.10

Charge  
2+

Ion score  
97.5

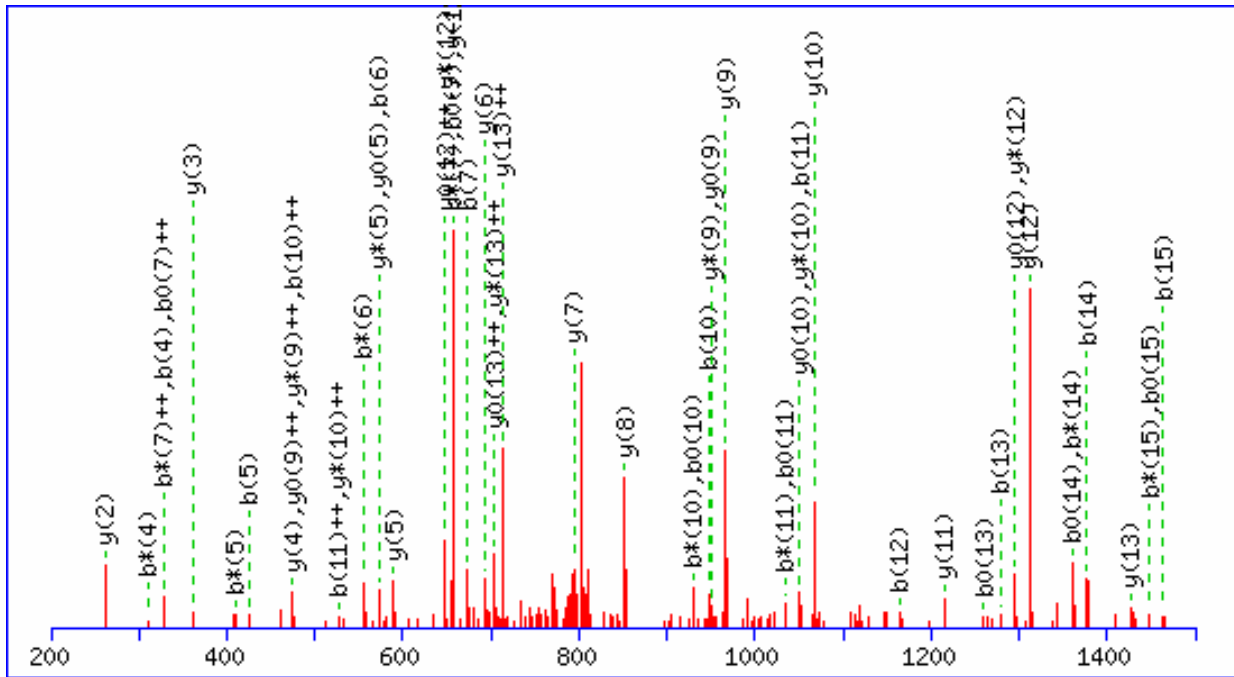

| #  | b              | b <sup>++</sup> | b <sup>*</sup> | b <sup>*++</sup> | b <sup>0</sup> | b <sup>0++</sup> | Seq. | y              | y <sup>++</sup> | y <sup>*</sup> | y <sup>*++</sup> | y <sup>0</sup> | y <sup>0++</sup> | #  |
|----|----------------|-----------------|----------------|------------------|----------------|------------------|------|----------------|-----------------|----------------|------------------|----------------|------------------|----|
| 1  | 58.06          | 29.53           |                |                  |                |                  | G    |                |                 |                |                  |                |                  | 16 |
| 2  | 115.11         | 58.06           |                |                  |                |                  | G    | 1582.74        | 791.87          | 1565.71        | 783.36           | 1564.72        | 782.87           | 15 |
| 3  | 214.24         | 107.62          |                |                  |                |                  | V    | 1525.69        | 763.35          | 1508.66        | 754.83           | 1507.67        | 754.34           | 14 |
| 4  | <b>328.34</b>  | 164.68          | <b>311.31</b>  | 156.16           |                |                  | N    | <b>1426.56</b> | <b>713.78</b>   | 1409.53        | <b>705.27</b>    | 1408.54        | <b>704.78</b>    | 13 |
| 5  | <b>425.46</b>  | 213.23          | <b>408.43</b>  | 204.72           |                |                  | P    | <b>1312.46</b> | <b>656.73</b>   | <b>1295.42</b> | <b>648.22</b>    | <b>1294.44</b> | <b>647.72</b>    | 12 |
| 6  | <b>572.63</b>  | 286.82          | <b>555.60</b>  | 278.31           |                |                  | F    | <b>1215.34</b> | 608.17          | 1198.31        | 599.66           | 1197.32        | 599.17           | 11 |
| 7  | <b>673.74</b>  | 337.37          | <b>656.71</b>  | <b>328.86</b>    | <b>655.72</b>  | <b>328.36</b>    | T    | <b>1068.17</b> | 534.59          | <b>1051.14</b> | <b>526.07</b>    | <b>1050.15</b> | 525.58           | 10 |
| 8  | 787.84         | 394.42          | 770.81         | 385.91           | 769.82         | 385.42           | N    | <b>967.06</b>  | 484.04          | <b>950.03</b>  | <b>475.52</b>    | <b>949.05</b>  | <b>475.03</b>    | 9  |
| 9  | 844.89         | 422.95          | 827.86         | 414.43           | 826.88         | 413.94           | G    | <b>852.96</b>  | 426.98          | 835.93         | 418.47           | 834.94         | 417.98           | 8  |
| 10 | <b>948.03</b>  | <b>474.52</b>   | <b>931.00</b>  | 466.01           | <b>930.02</b>  | 465.51           | C    | <b>795.91</b>  | 398.46          | 778.88         | 389.94           | 777.89         | 389.45           | 7  |
| 11 | <b>1051.18</b> | <b>526.09</b>   | <b>1034.15</b> | 517.58           | <b>1033.16</b> | 517.08           | C    | <b>692.77</b>  | 346.89          | 675.73         | 338.37           | 674.75         | 337.88           | 6  |
| 12 | <b>1165.28</b> | 583.14          | 1148.25        | 574.63           | 1147.26        | 574.14           | N    | <b>589.62</b>  | 295.32          | <b>572.59</b>  | 286.80           | <b>571.61</b>  | 286.31           | 5  |
| 13 | <b>1279.38</b> | 640.20          | 1262.35        | 631.68           | <b>1261.37</b> | 631.19           | N    | <b>475.52</b>  | 238.26          | 458.49         | 229.75           | 457.50         | 229.26           | 4  |
| 14 | <b>1378.51</b> | 689.76          | <b>1361.48</b> | 681.25           | <b>1360.50</b> | 680.75           | V    | <b>361.42</b>  | 181.21          | 344.39         | 172.70           | 343.40         | 172.20           | 3  |
| 15 | <b>1465.59</b> | 733.30          | <b>1448.56</b> | 724.78           | <b>1447.58</b> | 724.29           | S    | <b>262.29</b>  | 131.65          | 245.26         | 123.13           | 244.27         | 122.64           | 2  |
| 16 |                |                 |                |                  |                |                  | R    | 175.21         | 88.11           | 158.18         | 79.59            |                |                  | 1  |



Gene Symbol  
ZDHHC5

Sequences  
VLCSSPAPR

m/z  
465.24

Charge  
2+

Ion score  
66.3

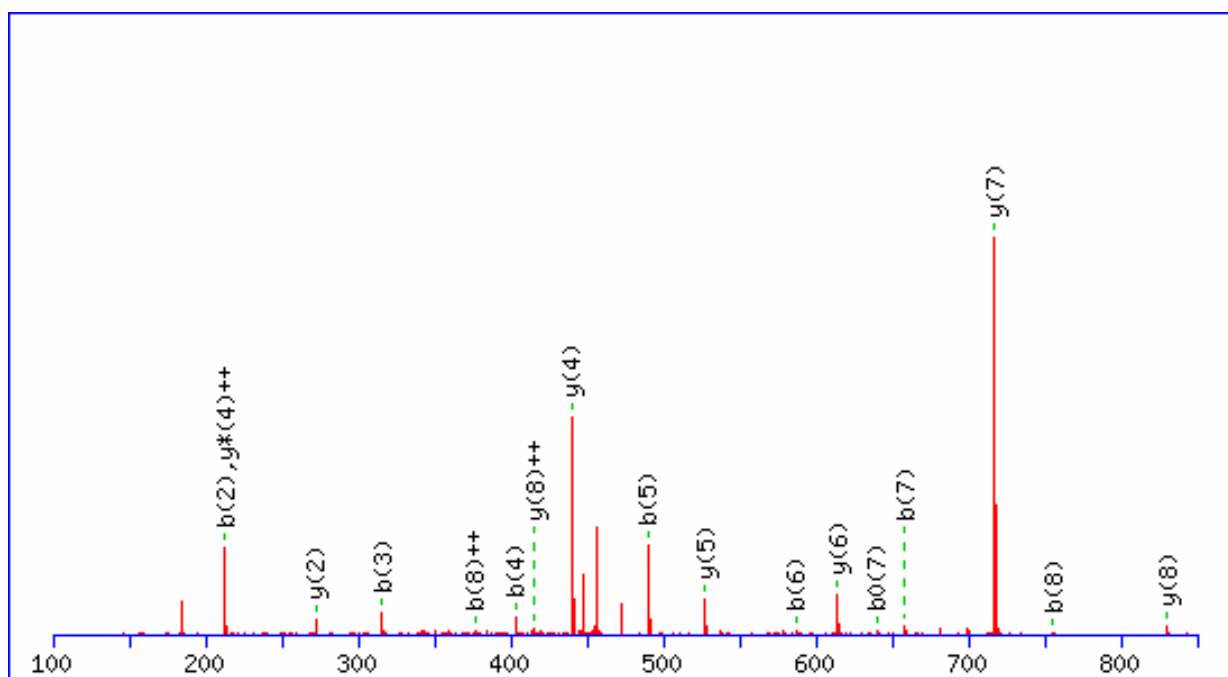

| # | b             | b <sup>++</sup> | b <sup>0</sup> | b <sup>0++</sup> | Seq. | y             | y <sup>++</sup> | y*     | y <sup>+++</sup> | y <sup>0</sup> | y <sup>0++</sup> | # |
|---|---------------|-----------------|----------------|------------------|------|---------------|-----------------|--------|------------------|----------------|------------------|---|
| 1 | 100.14        | 50.57           |                |                  | V    |               |                 |        |                  |                |                  | 9 |
| 2 | <b>213.30</b> | 107.15          |                |                  | L    | <b>830.97</b> | <b>415.99</b>   | 813.94 | 407.47           | 812.96         | 406.98           | 8 |
| 3 | <b>316.44</b> | 158.72          |                |                  | C    | <b>717.81</b> | 359.41          | 700.78 | 350.90           | 699.80         | 350.40           | 7 |
| 4 | <b>403.52</b> | 202.26          | 385.50         | 193.25           | S    | <b>614.67</b> | 307.84          | 597.64 | 299.32           | 596.66         | 298.83           | 6 |
| 5 | <b>490.59</b> | 245.80          | 472.58         | 236.79           | S    | <b>527.59</b> | 264.30          | 510.56 | 255.79           | 509.58         | 255.29           | 5 |
| 6 | <b>587.71</b> | 294.36          | 569.69         | 285.35           | P    | <b>440.52</b> | 220.76          | 423.49 | <b>212.25</b>    |                |                  | 4 |
| 7 | <b>658.79</b> | 329.90          | <b>640.77</b>  | 320.89           | A    | 343.40        | 172.20          | 326.37 | 163.69           |                |                  | 3 |
| 8 | <b>755.90</b> | <b>378.46</b>   | 737.89         | 369.45           | P    | <b>272.32</b> | 136.67          | 255.29 | 128.15           |                |                  | 2 |
| 9 |               |                 |                |                  | R    | 175.21        | 88.11           | 158.18 | 79.59            |                |                  | 1 |

Gene Symbol  
ZDHC6

Sequences  
YKVIEDYSGA**CC**PLNK

m/z  
902.30

Charge  
2+

Ion score  
103.4

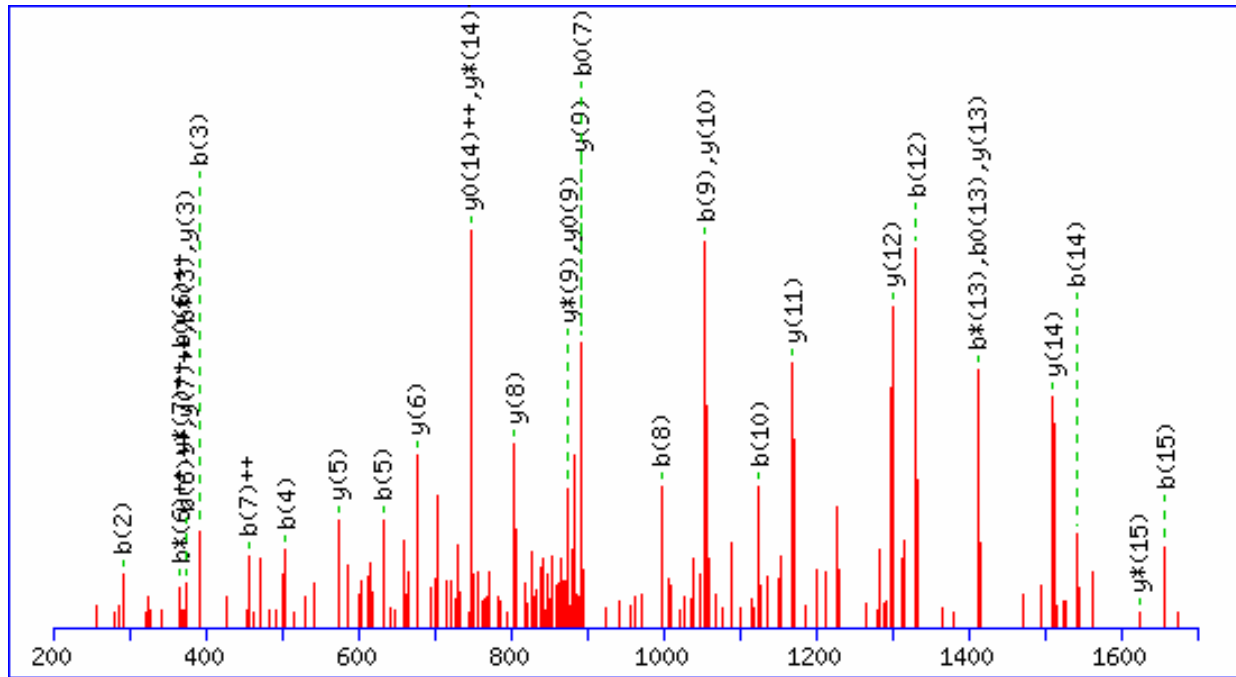

| #  | b              | b <sup>++</sup> | b <sup>*</sup> | b <sup>+++</sup> | b <sup>0</sup> | b <sup>0++</sup> | Seq. | y              | y <sup>++</sup> | y <sup>*</sup> | y <sup>+++</sup> | y <sup>0</sup> | y <sup>0++</sup> | #  |
|----|----------------|-----------------|----------------|------------------|----------------|------------------|------|----------------|-----------------|----------------|------------------|----------------|------------------|----|
| 1  | 164.18         | 82.59           |                |                  |                |                  | Y    |                |                 |                |                  |                |                  | 16 |
| 2  | <b>292.35</b>  | 146.68          | 275.32         | 138.17           |                |                  | K    | 1640.90        | 820.95          | <b>1623.87</b> | 812.44           | 1622.88        | 811.95           | 15 |
| 3  | <b>391.48</b>  | 196.25          | <b>374.45</b>  | 187.73           |                |                  | V    | <b>1512.73</b> | 756.87          | 1495.70        | <b>748.35</b>    | 1494.71        | <b>747.86</b>    | 14 |
| 4  | <b>504.64</b>  | 252.83          | 487.61         | 244.31           |                |                  | I    | <b>1413.60</b> | 707.30          | 1396.56        | 698.79           | 1395.58        | 698.29           | 13 |
| 5  | <b>633.76</b>  | 317.38          | 616.73         | 308.87           | 615.74         | 308.37           | E    | <b>1300.44</b> | 650.72          | 1283.41        | 642.21           | 1282.42        | 641.72           | 12 |
| 6  | <b>748.84</b>  | <b>374.93</b>   | 731.81         | <b>366.41</b>    | 730.83         | <b>365.92</b>    | D    | <b>1171.32</b> | 586.17          | 1154.29        | 577.65           | 1153.31        | 577.16           | 11 |
| 7  | 912.02         | <b>456.51</b>   | 894.99         | 448.00           | <b>894.00</b>  | 447.50           | Y    | <b>1056.24</b> | 528.62          | 1039.21        | 520.11           | 1038.22        | 519.61           | 10 |
| 8  | <b>999.09</b>  | 500.05          | 982.06         | 491.54           | 981.08         | 491.04           | S    | <b>893.06</b>  | 447.04          | <b>876.03</b>  | 438.52           | <b>875.05</b>  | 438.03           | 9  |
| 9  | <b>1056.15</b> | 528.58          | 1039.12        | 520.06           | 1038.13        | 519.57           | G    | <b>805.99</b>  | 403.50          | 788.96         | 394.98           |                |                  | 8  |
| 10 | <b>1127.22</b> | 564.12          | 1110.19        | 555.60           | 1109.21        | 555.11           | A    | <b>748.93</b>  | <b>374.97</b>   | 731.90         | <b>366.46</b>    |                |                  | 7  |
| 11 | 1230.37        | 615.69          | 1213.34        | 607.17           | 1212.35        | 606.68           | C    | <b>677.86</b>  | 339.43          | 660.83         | 330.92           |                |                  | 6  |
| 12 | <b>1333.51</b> | 667.26          | 1316.48        | 658.74           | 1315.49        | 658.25           | C    | <b>574.71</b>  | 287.86          | 557.68         | 279.35           |                |                  | 5  |
| 13 | 1430.62        | 715.82          | <b>1413.59</b> | 707.30           | <b>1412.61</b> | 706.81           | P    | 471.57         | 236.29          | 454.54         | 227.77           |                |                  | 4  |
| 14 | <b>1543.78</b> | 772.39          | 1526.75        | 763.88           | 1525.77        | 763.39           | L    | <b>374.46</b>  | 187.73          | 357.43         | 179.22           |                |                  | 3  |
| 15 | <b>1657.88</b> | 829.45          | 1640.85        | 820.93           | 1639.87        | 820.44           | N    | 261.30         | 131.15          | 244.27         | 122.64           |                |                  | 2  |
| 16 |                |                 |                |                  |                |                  | K    | 147.20         | 74.10           | 130.16         | 65.59            |                |                  | 1  |

Gene Symbol  
ZDHHC8

Sequences  
GCCGNVEHVLCSPLAPR

m/z  
878.57

Charge  
2+

Ion score  
75.6

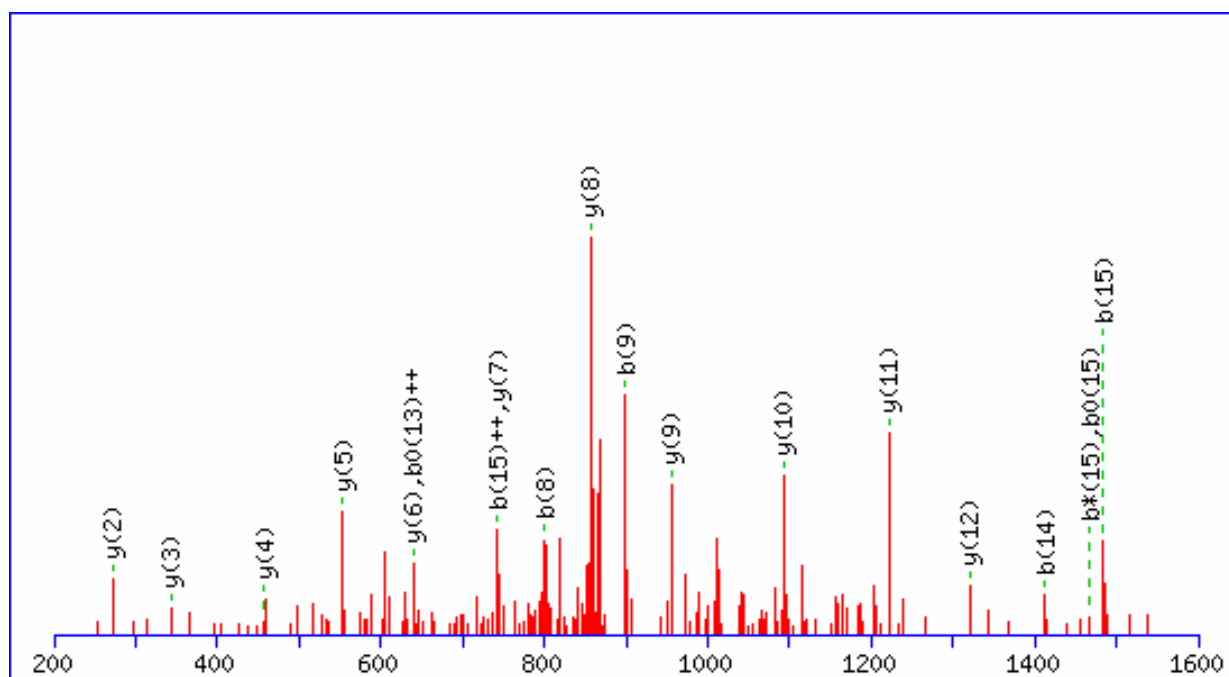

| #  | b       | b <sup>++</sup> | b <sup>*</sup> | b <sup>+++</sup> | b <sup>0</sup> | b <sup>0++</sup> | Seq. | y       | y <sup>++</sup> | y <sup>*</sup> | y <sup>+++</sup> | y <sup>0</sup> | y <sup>0++</sup> | #  |
|----|---------|-----------------|----------------|------------------|----------------|------------------|------|---------|-----------------|----------------|------------------|----------------|------------------|----|
| 1  | 58.06   | 29.53           |                |                  |                |                  | G    |         |                 |                |                  |                |                  | 17 |
| 2  | 161.20  | 81.11           |                |                  |                |                  | C    | 1699.01 | 850.01          | 1681.98        | 841.49           | 1680.99        | 841.00           | 16 |
| 3  | 264.35  | 132.68          |                |                  |                |                  | C    | 1595.86 | 798.44          | 1578.83        | 789.92           | 1577.85        | 789.43           | 15 |
| 4  | 321.40  | 161.20          |                |                  |                |                  | G    | 1492.72 | 746.86          | 1475.69        | 738.35           | 1474.71        | 737.86           | 14 |
| 5  | 435.50  | 218.25          | 418.47         | 209.74           |                |                  | N    | 1435.67 | 718.34          | 1418.64        | 709.82           | 1417.66        | 709.33           | 13 |
| 6  | 534.63  | 267.82          | 517.60         | 259.30           |                |                  | V    | 1321.57 | 661.29          | 1304.54        | 652.77           | 1303.55        | 652.28           | 12 |
| 7  | 663.74  | 332.38          | 646.71         | 323.86           | 645.73         | 323.37           | E    | 1222.44 | 611.72          | 1205.41        | 603.21           | 1204.42        | 602.71           | 11 |
| 8  | 800.88  | 400.95          | 783.85         | 392.43           | 782.87         | 391.94           | H    | 1093.32 | 547.17          | 1076.29        | 538.65           | 1075.31        | 538.16           | 10 |
| 9  | 900.01  | 450.51          | 882.98         | 442.00           | 882.00         | 441.50           | V    | 956.18  | 478.60          | 939.15         | 470.08           | 938.17         | 469.59           | 9  |
| 10 | 1013.17 | 507.09          | 996.14         | 498.57           | 995.16         | 498.08           | L    | 857.05  | 429.03          | 840.02         | 420.52           | 839.04         | 420.02           | 8  |
| 11 | 1116.31 | 558.66          | 1099.28        | 550.15           | 1098.30        | 549.65           | C    | 743.90  | 372.45          | 726.86         | 363.94           | 725.88         | 363.44           | 7  |
| 12 | 1203.39 | 602.20          | 1186.36        | 593.68           | 1185.38        | 593.19           | S    | 640.75  | 320.88          | 623.72         | 312.36           | 622.74         | 311.87           | 6  |
| 13 | 1300.51 | 650.76          | 1283.48        | 642.24           | 1282.49        | 641.75           | P    | 553.67  | 277.34          | 536.64         | 268.83           |                |                  | 5  |
| 14 | 1413.67 | 707.34          | 1396.63        | 698.82           | 1395.65        | 698.33           | L    | 456.56  | 228.78          | 439.53         | 220.27           |                |                  | 4  |
| 15 | 1484.74 | 742.88          | 1467.71        | 734.36           | 1466.73        | 733.87           | A    | 343.40  | 172.20          | 326.37         | 163.69           |                |                  | 3  |
| 16 | 1581.86 | 791.43          | 1564.83        | 782.92           | 1563.84        | 782.43           | P    | 272.32  | 136.67          | 255.29         | 128.15           |                |                  | 2  |
| 17 |         |                 |                |                  |                |                  | R    | 175.21  | 88.11           | 158.18         | 79.59            |                |                  | 1  |

Gene Symbol  
ZFR

Sequences  
MIPICPVVSFTYVPSRLGEDAK

m/z  
1232.93

Charge  
2+

Ion score  
58.6

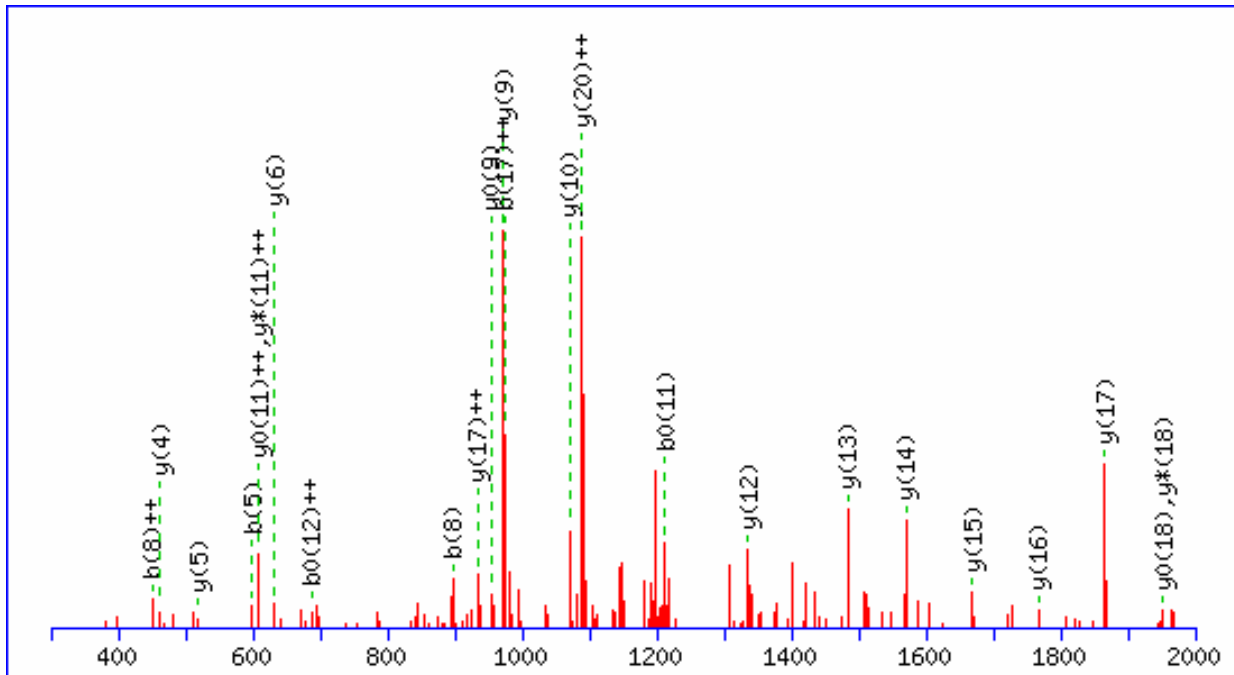

N-term : N-Acetyl (Protein)

| #  | b       | b <sup>++</sup> | b <sup>*</sup> | b <sup>*++</sup> | b <sup>0</sup> | b <sup>0++</sup> | Seq. | y       | y <sup>++</sup> | y <sup>*</sup> | y <sup>*++</sup> | y <sup>0</sup> | y <sup>0++</sup> | #  |
|----|---------|-----------------|----------------|------------------|----------------|------------------|------|---------|-----------------|----------------|------------------|----------------|------------------|----|
| 1  | 174.24  | 87.62           |                |                  |                |                  | M    |         |                 |                |                  |                |                  | 22 |
| 2  | 287.40  | 144.20          |                |                  |                |                  | I    | 2292.67 | 1146.84         | 2275.64        | 1138.32          | 2274.66        | 1137.83          | 21 |
| 3  | 384.51  | 192.76          |                |                  |                |                  | P    | 2179.51 | 1090.26         | 2162.48        | 1081.75          | 2161.50        | 1081.25          | 20 |
| 4  | 497.67  | 249.34          |                |                  |                |                  | I    | 2082.40 | 1041.70         | 2065.37        | 1033.19          | 2064.38        | 1032.70          | 19 |
| 5  | 600.81  | 300.91          |                |                  |                |                  | C    | 1969.24 | 985.12          | 1952.21        | 976.61           | 1951.23        | 976.12           | 18 |
| 6  | 697.93  | 349.47          |                |                  |                |                  | P    | 1866.10 | 933.55          | 1849.07        | 925.04           | 1848.08        | 924.55           | 17 |
| 7  | 797.06  | 399.03          |                |                  |                |                  | V    | 1768.98 | 885.00          | 1751.95        | 876.48           | 1750.97        | 875.99           | 16 |
| 8  | 896.19  | 448.60          |                |                  |                |                  | V    | 1669.85 | 835.43          | 1652.82        | 826.91           | 1651.84        | 826.42           | 15 |
| 9  | 983.27  | 492.14          |                |                  | 965.25         | 483.13           | S    | 1570.72 | 785.86          | 1553.69        | 777.35           | 1552.71        | 776.86           | 14 |
| 10 | 1130.44 | 565.73          |                |                  | 1112.43        | 556.72           | F    | 1483.64 | 742.33          | 1466.61        | 733.81           | 1465.63        | 733.32           | 13 |
| 11 | 1231.55 | 616.28          |                |                  | 1213.53        | 607.27           | T    | 1336.47 | 668.74          | 1319.44        | 660.22           | 1318.45        | 659.73           | 12 |
| 12 | 1394.72 | 697.86          |                |                  | 1376.70        | 688.86           | Y    | 1235.37 | 618.19          | 1218.34        | 609.67           | 1217.35        | 609.18           | 11 |
| 13 | 1493.85 | 747.43          |                |                  | 1475.84        | 738.42           | V    | 1072.19 | 536.60          | 1055.16        | 528.09           | 1054.18        | 527.59           | 10 |
| 14 | 1590.97 | 795.99          |                |                  | 1572.95        | 786.98           | P    | 973.06  | 487.03          | 956.03         | 478.52           | 955.05         | 478.03           | 9  |
| 15 | 1678.04 | 839.53          |                |                  | 1660.03        | 830.52           | S    | 875.95  | 438.48          | 858.92         | 429.96           | 857.93         | 429.47           | 8  |
| 16 | 1834.23 | 917.62          | 1817.20        | 909.10           | 1816.21        | 908.61           | R    | 788.87  | 394.94          | 771.84         | 386.42           | 770.85         | 385.93           | 7  |
| 17 | 1947.39 | 974.20          | 1930.36        | 965.68           | 1929.37        | 965.19           | L    | 632.68  | 316.85          | 615.65         | 308.33           | 614.67         | 307.84           | 6  |
| 18 | 2004.44 | 1002.72         | 1987.41        | 994.21           | 1986.42        | 993.72           | G    | 519.53  | 260.27          | 502.50         | 251.75           | 501.51         | 251.26           | 5  |
| 19 | 2133.55 | 1067.28         | 2116.52        | 1058.76          | 2115.54        | 1058.27          | E    | 462.47  | 231.74          | 445.44         | 223.23           | 444.46         | 222.73           | 4  |
| 20 | 2248.64 | 1124.82         | 2231.61        | 1116.31          | 2230.62        | 1115.82          | D    | 333.36  | 167.18          | 316.33         | 158.67           | 315.35         | 158.18           | 3  |
| 21 | 2319.72 | 1160.36         | 2302.69        | 1151.85          | 2301.70        | 1151.35          | A    | 218.27  | 109.64          | 201.24         | 101.13           |                |                  | 2  |
| 22 |         |                 |                |                  |                |                  | K    | 147.20  | 74.10           | 130.17         | 65.59            |                |                  | 1  |



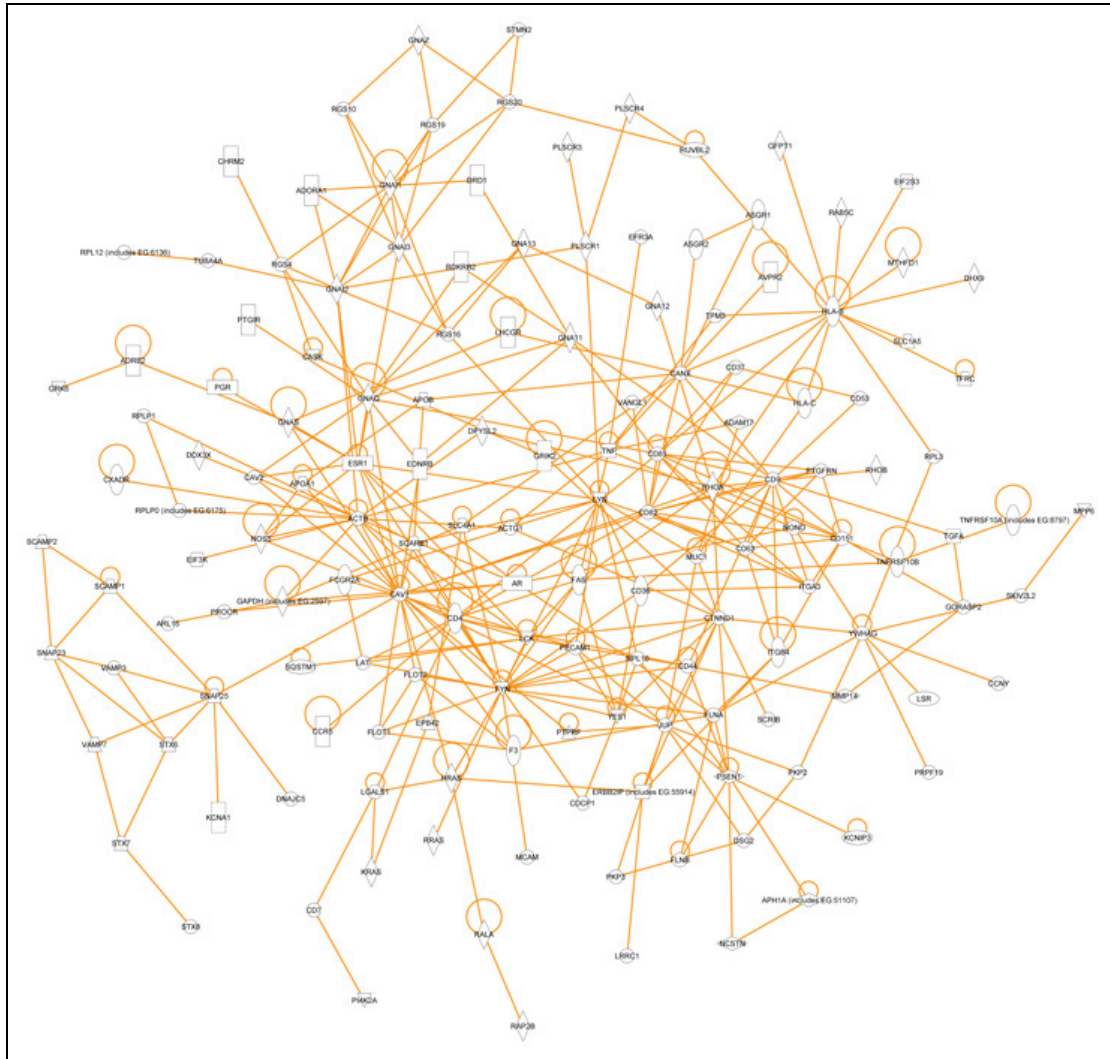

**Figure S5. Magnified view of the S-acylated protein network, in which two highly connected subnetworks emerge.** See Figure 10 for magnified view of the subnetworks.

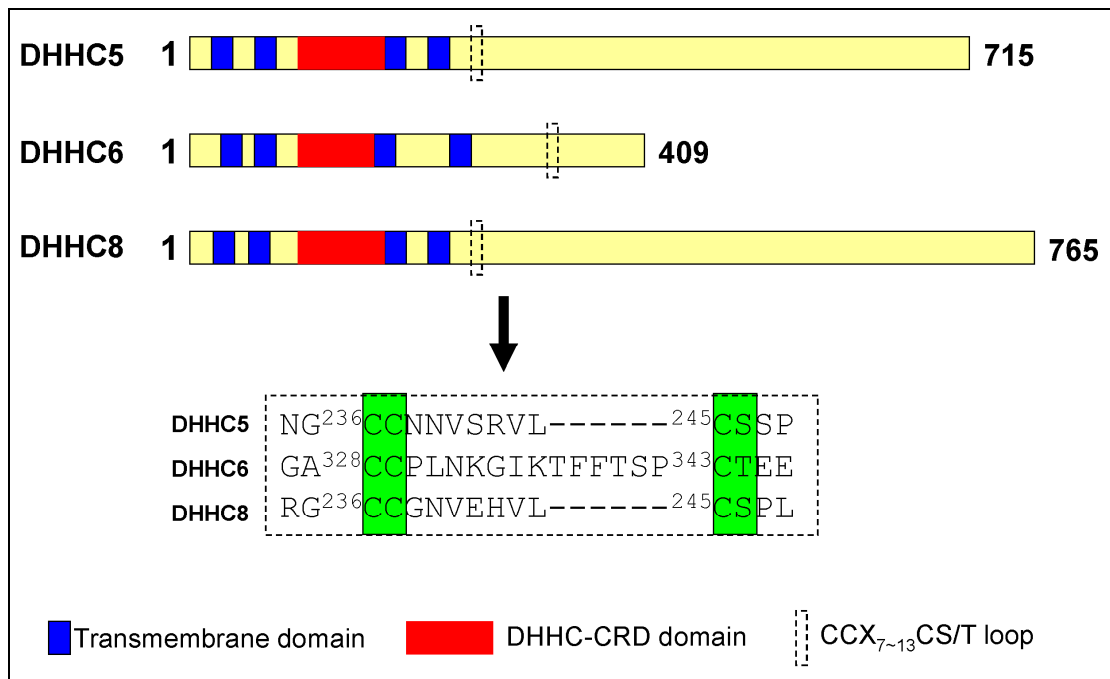

**Figure S6. Illustration of the primary structures of DHC5, DHC6, and DHC8 proteins and the alignment of CCX<sub>7~13</sub>CS/T loops.** Three putative S-acylated cysteine residues are localized downstream of a conserved DHC-CRD domain. The alignment analysis of the cysteines revealed a novel CCX<sub>7~13</sub>CS/T motif.

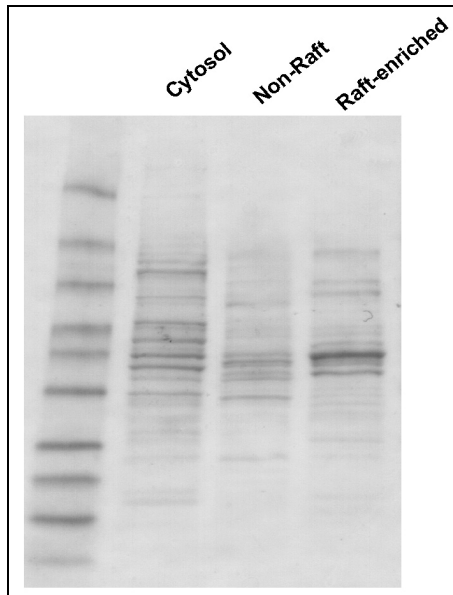

**Figure S7. Ponceau S stained blot to confirm equal protein loading.** 10 µg proteins from the cytoplasmic, non-raft, and lipid raft-enriched fractions were separated by SDS-PAGE and electrotransferred onto nitrocellulose membrane. Subsequently, the membrane was stained with Ponceau S stain for 5 min and destained with distilled water.
