# Supplementary material
Source: PubMed Central journal article supplement (PMC2808267)
Supplement: M800448-MCP200_2.pdf [file M800448-MCP200_2.pdf]

**Table S1. Identification of human S-acylated proteins from non-raft and lipid raft-enriched fractions using the protein-based procedure.**

| No. | Acc.Number  | Gene Symbol | Description                                                                                           | Fraction | Uni. Pep. | Sequence Coverage | Biological Replicates |     |     |     | Total EXP Each Fraction | Total CON Each Fraction | Total EXP Both Fractions | Total CON Both Fractions | EXP/CON Imputed | Ln(EXP/CON imputed) | P-value | 17-ODYA |
|-----|-------------|-------------|-------------------------------------------------------------------------------------------------------|----------|-----------|-------------------|-----------------------|-----|-----|-----|-------------------------|-------------------------|--------------------------|--------------------------|-----------------|---------------------|---------|---------|
|     |             |             |                                                                                                       |          |           |                   | 1st                   |     | 2nd |     |                         |                         |                          |                          |                 |                     |         |         |
|     |             |             |                                                                                                       |          |           |                   | EXP                   | CON | EXP | CON |                         |                         |                          |                          |                 |                     |         |         |
| 1   | IPI00739539 | A26C1B      | Ankrd26-like family C member 1B                                                                       | Raft     | 7         | 90/1075           | 6                     | 6   | 14  | 7   | 20                      | 13                      | 20                       | 13                       | 1.54            | 0.431               | 0.609   |         |
| 2   | IPI00002230 | AADACL1     | Arylacetylamide deacetylase-like 1                                                                    | Non-raft | 13        | 176/440           | 28                    | 16  | 24  | 7   | 52                      | 23                      | 55                       | 23                       | 2.39            | 0.872               | 0.382   | M       |
|     | IPI00002230 | AADACL1     | Arylacetylamide deacetylase-like 1                                                                    | Raft     | 3         | 41/440            | 3                     | 0   | 0   | 0   | 3                       | 0                       |                          |                          |                 |                     |         |         |
| 3   | IPI00027442 | AARS        | Alanyl-tRNA synthetase, cytoplasmic                                                                   | Non-raft | 5         | 67/968            | 2                     | 3   | 0   | 1   | 2                       | 4                       | 2                        | 4                        | 0.50            | -0.693              | 0.959   |         |
| 4   | IPI00065486 | ABCB6       | CDNA FLJ32464 fis, clone SKNMC1000251, highly similar to Homo sapiens MT-ABC transporter (MTABC) mRNA | Non-raft | 9         | 139/766           | 11                    | 0   | 3   | 0   | 14                      | 0                       | 14                       | 0                        | 14.00           | 2.639               | 0.005   |         |
| 5   | IPI00008338 | ABCC1       | Isoform 2 of Multidrug resistance-associated protein 1                                                | Non-raft | 2         | 18/1472           | 2                     | 0   | 0   | 0   | 2                       | 0                       | 2                        | 0                        | 2.00            | 0.693               | 0.473   |         |
| 6   | IPI00006675 | ABCC4       | Multidrug resistance-associated protein 4                                                             | Non-raft | 5         | 60/1325           | 4                     | 0   | 3   | 0   | 7                       | 0                       | 7                        | 0                        | 7.00            | 1.946               | 0.044   |         |
| 7   | IPI00303207 | ABCE1       | ATP-binding cassette sub-family E member 1                                                            | Non-raft | 9         | 141/599           | 6                     | 5   | 2   | 2   | 8                       | 7                       | 8                        | 7                        | 1.14            | 0.134               | 0.747   |         |
| 8   | IPI00001539 | ACAA2       | 3-ketoacyl-CoA thiolase, mitochondrial                                                                | Non-raft | 2         | 46/397            | 2                     | 0   | 0   | 0   | 2                       | 0                       | 2                        | 0                        | 2.00            | 0.693               | 0.473   |         |
| 9   | IPI00005040 | ACADM       | Medium-chain specific acyl-CoA dehydrogenase, mitochondrial precursor                                 | Non-raft | 2         | 20/421            | 0                     | 2   | 0   | 0   | 0                       | 2                       | 0                        | 2                        | 0.50            | -0.693              | 0.959   |         |
| 10  | IPI00028031 | ACADVL      | Isoform 1 of Very-long-chain specific acyl-CoA dehydrogenase, mitochondrial precursor                 | Non-raft | 16        | 187/701           | 10                    | 4   | 4   | 6   | 14                      | 10                      | 14                       | 10                       | 1.40            | 0.336               | 0.655   |         |
| 11  | IPI00030363 | ACAT1       | Acetyl-CoA acetyltransferase, mitochondrial precursor                                                 | Non-raft | 10        | 159/427           | 11                    | 2   | 5   | 1   | 16                      | 3                       | 16                       | 3                        | 5.33            | 1.674               | 0.089   |         |
| 12  | IPI00291419 | ACAT2       | Acetyl-CoA acetyltransferase, cytosolic                                                               | Non-raft | 8         | 135/397           | 10                    | 1   | 3   | 0   | 13                      | 1                       | 13                       | 1                        | 13.00           | 2.565               | 0.006   |         |
| 13  | IPI00021290 | ACLY        | ATP-citrate synthase                                                                                  | Non-raft | 6         | 86/1101           | 3                     | 4   | 0   | 1   | 3                       | 5                       | 3                        | 5                        | 0.60            | -0.511              | 0.934   |         |
| 14  | IPI00017855 | ACO2        | Aconitate hydratase, mitochondrial precursor                                                          | Non-raft | 6         | 78/780            | 3                     | 2   | 2   | 0   | 5                       | 2                       | 5                        | 2                        | 2.50            | 0.916               | 0.360   |         |
| 15  | IPI00003807 | ACP2        | Lysosomal acid phosphatase precursor                                                                  | Non-raft | 2         | 18/423            | 2                     | 0   | 0   | 0   | 2                       | 0                       | 2                        | 0                        | 2.00            | 0.693               | 0.473   |         |
| 16  | IPI00031397 | ACSL3       | Long-chain-fatty-acid--CoA ligase 3                                                                   | Non-raft | 10        | 143/720           | 6                     | 2   | 4   | 2   | 10                      | 4                       | 10                       | 4                        | 2.50            | 0.916               | 0.360   |         |
| 17  | IPI00029737 | ACSL4       | Isoform Long of Long-chain-fatty-acid--CoA ligase 4                                                   | Non-raft | 5         | 75/711            | 4                     | 1   | 0   | 0   | 4                       | 1                       | 4                        | 1                        | 4.00            | 1.386               | 0.165   |         |
| 18  | IPI00021428 | ACTA1       | Actin, alpha skeletal muscle                                                                          | Non-raft | 13        | 123/377           | 17                    | 21  | 21  | 21  | 38                      | 42                      | 103                      | 88                       | 1.17            | 0.157               | 0.737   | H       |
|     | IPI00021428 | ACTA1       | Actin, alpha skeletal muscle                                                                          | Raft     | 16        | 198/377           | 22                    | 24  | 43  | 22  | 65                      | 46                      |                          |                          |                 |                     |         |         |
| 19  | IPI00008603 | ACTA2       | Actin, aortic smooth muscle                                                                           | Non-raft | 5         | 78/377            | 4                     | 3   | 0   | 0   | 4                       | 3                       | 4                        | 3                        | 1.33            | 0.288               | 0.678   | H       |
| 20  | IPI00021439 | ACTB        | Actin, cytoplasmic 1                                                                                  | Non-raft | 25        | 252/375           | 61                    | 54  | 34  | 41  | 95                      | 95                      | 221                      | 190                      | 1.16            | 0.151               | 0.739   |         |
|     | IPI00021439 | ACTB        | Actin, cytoplasmic 1                                                                                  | Raft     | 24        | 291/375           | 60                    | 55  | 66  | 40  | 126                     | 95                      |                          |                          |                 |                     |         |         |
| 21  | IPI00021440 | ACTG1       | Actin, cytoplasmic 2                                                                                  | Non-raft | 25        | 252/375           | 60                    | 57  | 37  | 38  | 97                      | 95                      | 226                      | 192                      | 1.18            | 0.163               | 0.734   |         |
|     | IPI00021440 | ACTG1       | Actin, cytoplasmic 2                                                                                  | Raft     | 25        | 277/375           | 66                    | 57  | 63  | 40  | 129                     | 97                      |                          |                          |                 |                     |         |         |
| 22  | IPI00013508 | ACTN1       | Alpha-actinin-1                                                                                       | Non-raft | 14        | 182/892           | 9                     | 4   | 5   | 5   | 14                      | 9                       | 34                       | 22                       | 1.55            | 0.435               | 0.606   |         |
|     | IPI00013508 | ACTN1       | Alpha-actinin-1                                                                                       | Raft     | 17        | 220/892           | 17                    | 11  | 3   | 2   | 20                      | 13                      |                          |                          |                 |                     |         |         |
| 23  | IPI00013808 | ACTN4       | Alpha-actinin-4                                                                                       | Non-raft | 20        | 278/911           | 13                    | 8   | 4   | 9   | 17                      | 17                      | 44                       | 42                       | 1.05            | 0.047               | 0.782   |         |
|     | IPI00013808 | ACTN4       | Alpha-actinin-4                                                                                       | Raft     | 32        | 402/911           | 27                    | 25  | 0   | 0   | 27                      | 25                      |                          |                          |                 |                     |         |         |
| 24  | IPI00028091 | ACTR3       | Actin-like protein 3                                                                                  | Non-raft | 3         | 34/418            | 0                     | 3   | 0   | 0   | 0                       | 3                       | 0                        | 3                        | 0.33            | -1.099              | 0.988   |         |
| 25  | IPI00013897 | ADAM10      | ADAM 10 precursor                                                                                     | Non-raft | 13        | 161/748           | 11                    | 3   | 3   | 0   | 14                      | 3                       | 16                       | 3                        | 5.33            | 1.674               | 0.089   | M       |
|     | IPI00013897 | ADAM10      | ADAM 10 precursor                                                                                     | Raft     | 2         | 24/748            | 2                     | 0   | 0   | 0   | 2                       | 0                       |                          |                          |                 |                     |         |         |
| 26  | IPI00029606 | ADAM17      | Isoform B of ADAM 17 precursor                                                                        | Non-raft | 4         | 50/694            | 1                     | 0   | 3   | 0   | 4                       | 0                       | 8                        | 0                        | 8.00            | 2.079               | 0.030   |         |
|     | IPI00029606 | ADAM17      | Isoform B of ADAM 17 precursor                                                                        | Raft     | 2         | 20/694            | 2                     | 0   | 2   | 0   | 4                       | 0                       |                          |                          |                 |                     |         |         |
| 27  | IPI00440932 | ADAM9       | Isoform 1 of ADAM 9 precursor                                                                         | Non-raft | 9         | 111/819           | 9                     | 9   | 2   | 1   | 11                      | 10                      | 11                       | 10                       | 1.10            | 0.095               | 0.762   |         |
| 28  | IPI00025057 | ADAR        | Isoform 2 of Double-stranded RNA-specific adenosine deaminase                                         | Raft     | 3         | 52/1200           | 2                     | 0   | 1   | 0   | 3                       | 0                       | 3                        | 0                        | 3.00            | 1.099               | 0.275   |         |
| 29  | IPI00019141 | AGPAT1      | 1-acyl-sn-glycerol-3-phosphate acyltransferase alpha                                                  | Non-raft | 2         | 31/283            | 2                     | 0   | 3   | 0   | 5                       | 0                       | 5                        | 0                        | 5.00            | 1.609               | 0.103   | H       |
| 30  | IPI00385128 | AGPAT7      | Isoform 1 of 1-acyl-sn-glycerol-3-phosphate acyltransferase eta                                       | Non-raft | 5         | 61/524            | 4                     | 1   | 2   | 0   | 6                       | 1                       | 6                        | 1                        | 6.00            | 1.792               | 0.067   |         |
| 31  | IPI00010349 | AGPS        | Alkylidihydroxyacetonephosphate synthase, peroxisomal precursor                                       | Non-raft | 4         | 54/658            | 2                     | 3   | 0   | 0   | 2                       | 3                       | 2                        | 3                        | 0.67            | -0.405              | 0.914   |         |
| 32  | IPI00374563 | AGRN        | Agtrin precursor                                                                                      | Non-raft | 7         | 84/2045           | 1                     | 7   | 0   | 0   | 1                       | 7                       | 5                        | 9                        | 0.56            | -0.588              | 0.946   |         |
|     | IPI00374563 | AGRN        | Agtrin precursor                                                                                      | Raft     | 5         | 62/2045           | 4                     | 2   | 0   | 0   | 4                       | 2                       |                          |                          |                 |                     |         |         |

| No. | Acc.Number  | Gene Symbol | Description                                                                    | Fraction | Uni. Pep. | Sequence Coverage | Biological Replicates |     |     |     | Total EXP Each Fraction | Total CON Each Fraction | Total EXP Both Fractions | Total CON Both Fractions | EXP/CON Imputed | Ln(EXP/CON imputed) | P-value | 17-ODYA |
|-----|-------------|-------------|--------------------------------------------------------------------------------|----------|-----------|-------------------|-----------------------|-----|-----|-----|-------------------------|-------------------------|--------------------------|--------------------------|-----------------|---------------------|---------|---------|
|     |             |             |                                                                                |          |           |                   | 1st                   |     | 2nd |     |                         |                         |                          |                          |                 |                     |         |         |
|     |             |             |                                                                                |          |           |                   | EXP                   | CON | EXP | CON |                         |                         |                          |                          |                 |                     |         |         |
| 33  | IPI00012007 | AHCY        | Adenosylhomocysteinase                                                         | Non-raft | 8         | 84/432            | 4                     | 4   | 0   | 2   | 4                       | 6                       | 4                        | 6                        | 0.67            | -0.405              | 0.914   |         |
| 34  | IPI00182938 | AHCYL1      | Putative adenosylhomocysteinase 2                                              | Non-raft | 2         | 26/530            | 1                     | 1   | 0   | 0   | 1                       | 1                       | 1                        | 1                        | 1.00            | 0.000               | 0.799   |         |
| 35  | IPI00021812 | AHNAK       | Neuroblast differentiation-associated protein AHNAK (Fragment)                 | Non-raft | 4         | 56/5890           | 2                     | 3   | 0   | 0   | 2                       | 3                       | 2                        | 3                        | 0.67            | -0.405              | 0.914   |         |
| 36  | IPI00856045 | AHNAK2      | Isoform 1 of protein AHNAK2                                                    | Non-raft | 3         | 38/5795           | 3                     | 0   | 0   | 0   | 3                       | 0                       | 3                        | 0                        | 3.00            | 1.099               | 0.275   |         |
| 37  | IPI00000690 | AIFM1       | Isoform 1 of Programmed cell death protein 8, mitochondrial precursor          | Non-raft | 2         | 27/613            | 1                     | 0   | 1   | 0   | 2                       | 0                       | 2                        | 0                        | 2.00            | 0.693               | 0.473   |         |
| 38  | IPI00413641 | AKR1B1      | Aldose reductase                                                               | Non-raft | 2         | 18/316            | 2                     | 1   | 0   | 0   | 2                       | 1                       | 2                        | 1                        | 2.00            | 0.693               | 0.473   |         |
| 39  | IPI00015102 | ALCAM       | CD166 antigen precursor                                                        | Non-raft | 2         | 24/583            | 2                     | 0   | 0   | 0   | 2                       | 0                       | 2                        | 0                        | 2.00            | 0.693               | 0.473   |         |
| 40  | IPI00008982 | ALDH18A1    | Isoform Long of Delta 1-pyrroline-5-carboxylate synthetase                     | Non-raft | 8         | 90/795            | 9                     | 1   | 3   | 1   | 12                      | 2                       | 12                       | 2                        | 6.00            | 1.792               | 0.067   |         |
| 41  | IPI00103467 | ALDH1B1     | Aldehyde dehydrogenase X, mitochondrial precursor                              | Non-raft | 6         | 94/517            | 5                     | 0   | 5   | 1   | 10                      | 1                       | 10                       | 1                        | 10.00           | 2.303               | 0.015   |         |
| 42  | IPI00006663 | ALDH2       | Aldehyde dehydrogenase, mitochondrial precursor                                | Non-raft | 4         | 58/517            | 2                     | 2   | 3   | 0   | 5                       | 2                       | 5                        | 2                        | 2.50            | 0.916               | 0.360   |         |
| 43  | IPI00018031 | ALDH3B1     | Isoform 1 of Aldehyde dehydrogenase 3B1                                        | Non-raft | 8         | 96/468            | 9                     | 0   | 4   | 0   | 13                      | 0                       | 18                       | 0                        | 18.00           | 2.890               | 0.002   |         |
|     | IPI00018031 | ALDH3B1     | Isoform 1 of Aldehyde dehydrogenase 3B1                                        | Raft     | 2         | 23/468            | 3                     | 0   | 2   | 0   | 5                       | 0                       |                          |                          |                 |                     |         |         |
| 44  | IPI00019888 | ALDH5A1     | Succinate semialdehyde dehydrogenase, mitochondrial precursor                  | Non-raft | 2         | 28/535            | 2                     | 0   | 1   | 0   | 3                       | 0                       | 3                        | 0                        | 3.00            | 1.099               | 0.275   |         |
| 45  | IPI00024990 | ALDH6A1     | Methylmalonate-semialdehyde dehydrogenase [acylating], mitochondrial precursor | Non-raft | 4         | 44/535            | 1                     | 0   | 3   | 0   | 4                       | 0                       | 4                        | 0                        | 4.00            | 1.386               | 0.165   |         |
| 46  | IPI00221234 | ALDH7A1     | Similar to Aldehyde dehydrogenase family 7 member A1                           | Non-raft | 4         | 55/539            | 2                     | 3   | 1   | 0   | 3                       | 3                       | 3                        | 3                        | 1.00            | 0.000               | 0.799   |         |
| 47  | IPI00465439 | ALDOA       | Fructose-bisphosphate aldolase A                                               | Non-raft | 21        | 251/364           | 26                    | 24  | 11  | 9   | 37                      | 33                      | 37                       | 33                       | 1.12            | 0.114               | 0.755   | M       |
| 48  | IPI00022426 | AMBP        | AMBP protein precursor                                                         | Non-raft | 3         | 31/352            | 0                     | 0   | 0   | 4   | 0                       | 4                       | 0                        | 6                        | 0.17            | -1.792              | 0.999   |         |
|     | IPI00022426 | AMBP        | AMBP protein precursor                                                         | Raft     | 2         | 19/352            | 0                     | 0   | 0   | 2   | 0                       | 2                       |                          |                          |                 |                     |         |         |
| 49  | IPI00030431 | ANTXR1      | Isoform 1 of Anthrax toxin receptor 1 precursor                                | Non-raft | 8         | 83/564            | 12                    | 0   | 7   | 0   | 19                      | 0                       | 26                       | 0                        | 26.00           | 3.258               | 0.000   | M       |
|     | IPI00030431 | ANTXR1      | Isoform 1 of Anthrax toxin receptor 1 precursor                                | Raft     | 5         | 54/564            | 5                     | 0   | 2   | 0   | 7                       | 0                       |                          |                          |                 |                     |         |         |
| 50  | IPI00036552 | ANTXR2      | Isoform 2 of Anthrax toxin receptor 2 precursor                                | Non-raft | 3         | 35/386            | 3                     | 0   | 3   | 0   | 6                       | 0                       | 6                        | 0                        | 6.00            | 1.792               | 0.067   |         |
| 51  | IPI00218918 | ANXA1       | Annexin A1                                                                     | Non-raft | 9         | 117/346           | 7                     | 4   | 0   | 1   | 7                       | 5                       | 7                        | 5                        | 1.40            | 0.336               | 0.655   |         |
| 52  | IPI00418169 | ANXA2       | annexin A2 isoform 1                                                           | Non-raft | 24        | 228/357           | 44                    | 30  | 20  | 22  | 64                      | 52                      | 103                      | 78                       | 1.32            | 0.278               | 0.683   |         |
|     | IPI00418169 | ANXA2       | annexin A2 isoform 1                                                           | Raft     | 19        | 188/357           | 23                    | 20  | 16  | 6   | 39                      | 26                      |                          |                          |                 |                     |         |         |
| 53  | IPI00334627 | ANXA2P2     | Similar to annexin A2 isoform 1                                                | Non-raft | 11        | 138/339           | 17                    | 12  | 2   | 1   | 19                      | 13                      | 21                       | 14                       | 1.50            | 0.405               | 0.621   |         |
|     | IPI00334627 | ANXA2P2     | Similar to annexin A2 isoform 1                                                | Raft     | 2         | 21/339            | 2                     | 1   | 0   | 0   | 2                       | 1                       |                          |                          |                 |                     |         |         |
| 54  | IPI00555692 | ANXA4       | ANXA4 protein                                                                  | Non-raft | 6         | 78/319            | 6                     | 1   | 0   | 0   | 6                       | 1                       | 6                        | 1                        | 6.00            | 1.792               | 0.067   |         |
| 55  | IPI00002459 | ANXA6       | annexin VI isoform 2                                                           | Non-raft | 5         | 68/667            | 4                     | 2   | 0   | 0   | 4                       | 2                       | 4                        | 2                        | 2.00            | 0.693               | 0.473   |         |
| 56  | IPI00016621 | AP2A2       | AP-2 complex subunit alpha-2                                                   | Non-raft | 2         | 28/940            | 2                     | 0   | 0   | 0   | 2                       | 0                       | 4                        | 1                        | 4.00            | 1.386               | 0.165   |         |
|     | IPI00016621 | AP2A2       | AP-2 complex subunit alpha-2                                                   | Raft     | 2         | 28/940            | 2                     | 1   | 0   | 0   | 2                       | 1                       |                          |                          |                 |                     |         |         |
| 57  | IPI00215911 | APEX1       | DNA-(apurinic or apyrimidinic site) lyase                                      | Non-raft | 4         | 68/318            | 4                     | 3   | 2   | 0   | 6                       | 3                       | 12                       | 5                        | 2.40            | 0.875               | 0.380   |         |
|     | IPI00215911 | APEX1       | DNA-(apurinic or apyrimidinic site) lyase                                      | Raft     | 5         | 83/318            | 3                     | 1   | 3   | 1   | 6                       | 2                       |                          |                          |                 |                     |         |         |
| 58  | IPI00298520 | ARCNI       | Hypothetical protein DKEZp686M09245                                            | Non-raft | 7         | 78/552            | 6                     | 3   | 2   | 1   | 8                       | 4                       | 8                        | 4                        | 2.00            | 0.693               | 0.473   |         |
| 59  | IPI00215914 | ARF1        | ADP-ribosylation factor 1                                                      | Non-raft | 2         | 28/181            | 0                     | 0   | 1   | 1   | 1                       | 1                       | 1                        | 1                        | 1.00            | 0.000               | 0.799   | M       |
| 60  | IPI00291560 | ARG1        | Isoform 1 of Arginase-1                                                        | Non-raft | 3         | 42/322            | 0                     | 3   | 0   | 0   | 0                       | 3                       | 2                        | 6                        | 0.33            | -1.099              | 0.988   |         |
|     | IPI00291560 | ARG1        | Isoform 1 of Arginase-1                                                        | Raft     | 4         | 53/322            | 2                     | 3   | 0   | 0   | 2                       | 3                       |                          |                          |                 |                     |         |         |
| 61  | IPI00005163 | ARL15       | ARFRP2 protein                                                                 | Non-raft | 4         | 58/204            | 2                     | 0   | 5   | 0   | 7                       | 0                       | 7                        | 0                        | 7.00            | 1.946               | 0.044   | M       |
| 62  | IPI00169267 | ARL6IP2     | ARL6IP2                                                                        | Non-raft | 2         | 30/583            | 1                     | 1   | 0   | 0   | 1                       | 1                       | 1                        | 1                        | 1.00            | 0.000               | 0.799   |         |
| 63  | IPI00007426 | ARL6IP5     | PRA1 family protein 3                                                          | Non-raft | 3         | 39/188            | 5                     | 0   | 0   | 1   | 5                       | 1                       | 5                        | 1                        | 5.00            | 1.609               | 0.103   |         |
| 64  | IPI00167074 | ARL6IP6     | Phosphonoformate immuno-associated protein 1                                   | Non-raft | 2         | 20/226            | 2                     | 0   | 1   | 0   | 3                       | 0                       | 3                        | 0                        | 3.00            | 1.099               | 0.275   | H       |
| 65  | IPI00018871 | ARL8B       | ADP-ribosylation factor-like protein 8B                                        | Non-raft | 3         | 47/238            | 2                     | 1   | 1   | 0   | 3                       | 1                       | 3                        | 1                        | 3.00            | 1.099               | 0.275   |         |
| 66  | IPI00013698 | ASAH1       | Acid ceramidase precursor                                                      | Non-raft | 3         | 29/395            | 2                     | 0   | 1   | 0   | 3                       | 0                       | 3                        | 0                        | 3.00            | 1.099               | 0.275   |         |
| 67  | IPI00420014 | ASCC3L1     | U5 small nuclear ribonucleoprotein 200 kDa helicase                            | Raft     | 9         | 103/2136          | 7                     | 2   | 0   | 0   | 7                       | 2                       | 7                        | 2                        | 3.50            | 1.253               | 0.212   | M       |
| 68  | IPI00554777 | ASNS        | Asparagine synthetase                                                          | Non-raft | 2         | 23/561            | 2                     | 0   | 1   | 0   | 3                       | 0                       | 3                        | 0                        | 3.00            | 1.099               | 0.275   |         |
| 69  | IPI00294834 | ASPH        | Aspartyl/asparaginyl beta-hydroxylase                                          | Raft     | 3         | 43/758            | 2                     | 1   | 0   | 0   | 2                       | 1                       | 10                       | 4                        | 2.50            | 0.916               | 0.360   |         |
|     | IPI00294834 | ASPH        | Aspartyl/asparaginyl beta-hydroxylase                                          | Non-raft | 8         | 93/758            | 6                     | 3   | 2   | 0   | 8                       | 3                       |                          |                          |                 |                     |         |         |

| No. | Acc.Number  | Gene Symbol | Description                                                                                                                         | Fraction | Uni. Pep. | Sequence Coverage | Biological Replicates |     |     |     | Total EXP Each Fraction | Total CON Each Fraction | Total EXP Both Fractions | Total CON Both Fractions | EXP/CON Imputed | Ln(EXP/CON imputed) | P-value | 17-ODYA |
|-----|-------------|-------------|-------------------------------------------------------------------------------------------------------------------------------------|----------|-----------|-------------------|-----------------------|-----|-----|-----|-------------------------|-------------------------|--------------------------|--------------------------|-----------------|---------------------|---------|---------|
|     |             |             |                                                                                                                                     |          |           |                   | 1st                   |     | 2nd |     |                         |                         |                          |                          |                 |                     |         |         |
|     |             |             |                                                                                                                                     |          |           |                   | EXP                   | CON | EXP | CON |                         |                         |                          |                          |                 |                     |         |         |
| 70  | IPI00550523 | ATL3        | hypothetical protein LOC25923                                                                                                       | Non-raft | 3         | 55/541            | 3                     | 1   | 0   | 1   | 3                       | 2                       | 3                        | 2                        | 1.50            | 0.405               | 0.621   |         |
| 71  | IPI00255653 | ATP11A      | Probable phospholipid-transporting ATPase IH                                                                                        | Non-raft | 8         | 103/1134          | 7                     | 0   | 3   | 0   | 10                      | 0                       | 10                       | 0                        | 10.00           | 2.303               | 0.015   |         |
| 72  | IPI00240793 | ATP11B      | Probable phospholipid-transporting ATPase IF                                                                                        | Non-raft | 6         | 97/1177           | 5                     | 0   | 3   | 0   | 8                       | 0                       | 8                        | 0                        | 8.00            | 2.079               | 0.030   | M       |
| 73  | IPI00177661 | ATP13A3     | PREDICTED: similar to Probable cation-transporting ATPase 13A3 (ATPase family homolog up-regulated in senescence cells 1) isoform 2 | Non-raft | 5         | 79/684            | 5                     | 0   | 0   | 0   | 5                       | 0                       | 5                        | 0                        | 5.00            | 1.609               | 0.103   | M       |
| 74  | IPI00006482 | ATP1A1      | Isoform Long of Sodium/potassium-transporting ATPase alpha-1 chain precursor                                                        | Non-raft | 28        | 327/1023          | 27                    | 20  | 13  | 10  | 40                      | 30                      | 45                       | 34                       | 1.32            | 0.280               | 0.682   | H       |
|     | IPI00006482 | ATP1A1      | Isoform Long of Sodium/potassium-transporting ATPase alpha-1 chain precursor                                                        | Raft     | 6         | 82/1023           | 5                     | 4   | 0   | 0   | 5                       | 4                       |                          |                          |                 |                     |         |         |
| 75  | IPI00219078 | ATP2A2      | Isoform SERCA2B of Sarcoplasmic/endoplasmic reticulum calcium ATPase 2                                                              | Non-raft | 28        | 345/1042          | 31                    | 25  | 17  | 7   | 48                      | 32                      | 48                       | 32                       | 1.50            | 0.405               | 0.621   |         |
| 76  | IPI00021695 | ATP2B1      | Isoform D of Plasma membrane calcium-transporting ATPase 1                                                                          | Non-raft | 7         | 79/1258           | 6                     | 3   | 0   | 0   | 6                       | 3                       | 6                        | 3                        | 2.00            | 0.693               | 0.473   |         |
| 77  | IPI00012490 | ATP2B4      | Isoform XD of Plasma membrane calcium-transporting ATPase 4                                                                         | Non-raft | 9         | 118/1241          | 9                     | 3   | 0   | 0   | 9                       | 3                       | 9                        | 3                        | 3.00            | 1.099               | 0.275   | M       |
| 78  | IPI00220473 | ATP2C1      | Isoform 2 of Calcium-transporting ATPase type 2C member 1                                                                           | Non-raft | 2         | 28/888            | 2                     | 0   | 0   | 0   | 2                       | 0                       | 2                        | 0                        | 2.00            | 0.693               | 0.473   |         |
| 79  | IPI00440493 | ATP5A1      | ATP synthase subunit alpha, mitochondrial precursor                                                                                 | Non-raft | 18        | 233/553           | 17                    | 10  | 9   | 5   | 26                      | 15                      | 26                       | 15                       | 1.73            | 0.550               | 0.548   |         |
| 80  | IPI00303476 | ATP5B       | ATP synthase subunit beta, mitochondrial precursor                                                                                  | Non-raft | 5         | 76/529            | 5                     | 2   | 4   | 0   | 9                       | 2                       | 9                        | 2                        | 4.50            | 1.504               | 0.130   |         |
| 81  | IPI00219291 | ATP5J2      | ATP synthase, H+ transporting, mitochondrial F0 complex, subunit F2 isoform 2b                                                      | Non-raft | 2         | 24/88             | 2                     | 0   | 0   | 0   | 2                       | 0                       | 2                        | 0                        | 2.00            | 0.693               | 0.473   |         |
| 82  | IPI00007611 | ATP5O       | ATP synthase O subunit, mitochondrial precursor                                                                                     | Non-raft | 2         | 12/213            | 1                     | 0   | 1   | 0   | 2                       | 0                       | 2                        | 0                        | 2.00            | 0.693               | 0.473   | M       |
| 83  | IPI00024368 | ATP9A       | Isoform Long of Probable phospholipid-transporting ATPase IIA                                                                       | Non-raft | 2         | 20/1047           | 2                     | 0   | 0   | 0   | 2                       | 0                       | 2                        | 0                        | 2.00            | 0.693               | 0.473   |         |
| 84  | IPI00180154 | ATXN2       | 140 kDa protein                                                                                                                     | Raft     | 3         | 48/1313           | 0                     | 3   | 0   | 0   | 0                       | 3                       | 0                        | 3                        | 0.33            | -1.099              | 0.988   |         |
| 85  | IPI00456359 | ATXN2L      | Isoform 1 of Ataxin-2-like protein                                                                                                  | Raft     | 2         | 34/1075           | 2                     | 0   | 0   | 0   | 2                       | 0                       | 2                        | 0                        | 2.00            | 0.693               | 0.473   |         |
| 86  | IPI00001891 | AUP1        | Isoform Long of Ancient ubiquitous protein 1 precursor                                                                              | Non-raft | 5         | 111/476           | 5                     | 0   | 6   | 0   | 11                      | 0                       | 11                       | 0                        | 11.00           | 2.398               | 0.011   | H       |
| 87  | IPI00296992 | AXL         | AXL receptor tyrosine kinase isoform 1                                                                                              | Non-raft | 3         | 41/894            | 2                     | 4   | 1   | 0   | 3                       | 4                       | 3                        | 4                        | 0.75            | -0.288              | 0.888   |         |
| 88  | IPI00166729 | AZGP1       | alpha-2-glycoprotein 1, zinc                                                                                                        | Non-raft | 2         | 33/298            | 0                     | 1   | 0   | 1   | 0                       | 2                       | 0                        | 2                        | 0.50            | -0.693              | 0.959   |         |
| 89  | IPI00215767 | B4GALT1     | Isoform Long of Beta-1,4-galactosyltransferase 1                                                                                    | Non-raft | 2         | 33/398            | 3                     | 0   | 0   | 0   | 3                       | 0                       | 3                        | 0                        | 3.00            | 1.099               | 0.275   | M       |
| 90  | IPI00000643 | BAG2        | BAG family molecular chaperone regulator 2                                                                                          | Raft     | 3         | 44/211            | 3                     | 0   | 0   | 0   | 3                       | 0                       | 3                        | 0                        | 3.00            | 1.099               | 0.275   |         |
| 91  | IPI00033075 | BAT5        | Protein BAT5                                                                                                                        | Non-raft | 4         | 42/558            | 6                     | 0   | 1   | 0   | 7                       | 0                       | 7                        | 0                        | 7.00            | 1.946               | 0.044   | H       |
| 92  | IPI00002406 | BCAM        | Lutheran blood group glycoprotein precursor                                                                                         | Non-raft | 20        | 275/628           | 35                    | 3   | 17  | 0   | 52                      | 3                       | 61                       | 4                        | 15.25           | 2.725               | 0.003   |         |
|     | IPI00002406 | BCAM        | Lutheran blood group glycoprotein precursor                                                                                         | Raft     | 8         | 112/628           | 4                     | 0   | 5   | 1   | 9                       | 1                       |                          |                          |                 |                     |         |         |
| 93  | IPI00019835 | BCL2L12     | Isoform 1 of Bcl-2-related proline-rich protein                                                                                     | Non-raft | 4         | 53/334            | 5                     | 0   | 1   | 0   | 6                       | 0                       | 6                        | 0                        | 6.00            | 1.792               | 0.067   |         |
| 94  | IPI00219575 | BLMH        | Bleomycin hydrolase                                                                                                                 | Non-raft | 3         | 49/455            | 0                     | 3   | 0   | 0   | 0                       | 3                       | 1                        | 4                        | 0.25            | -1.386              | 0.996   |         |
|     | IPI00219575 | BLMH        | Bleomycin hydrolase                                                                                                                 | Raft     | 2         | 31/455            | 1                     | 1   | 0   | 0   | 1                       | 1                       |                          |                          |                 |                     |         |         |
| 95  | IPI00019906 | BSG         | Isoform 2 of Basigin precursor                                                                                                      | Non-raft | 4         | 51/269            | 3                     | 1   | 0   | 1   | 3                       | 2                       | 3                        | 2                        | 1.50            | 0.405               | 0.621   |         |
| 96  | IPI00013468 | BUB3        | Mitotic checkpoint protein BUB3                                                                                                     | Non-raft | 4         | 58/328            | 2                     | 2   | 0   | 1   | 2                       | 3                       | 8                        | 4                        | 2.00            | 0.693               | 0.473   |         |
|     | IPI00013468 | BUB3        | Mitotic checkpoint protein BUB3                                                                                                     | Raft     | 4         | 60/328            | 6                     | 1   | 0   | 0   | 6                       | 1                       |                          |                          |                 |                     |         |         |
| 97  | IPI00016670 | C11orf59    | FLJ20625 protein                                                                                                                    | Non-raft | 6         | 84/161            | 6                     | 0   | 7   | 0   | 13                      | 0                       | 25                       | 0                        | 25.00           | 3.219               | 0.000   | H       |
|     | IPI00016670 | C11orf59    | FLJ20625 protein                                                                                                                    | Raft     | 7         | 85/161            | 9                     | 0   | 3   | 0   | 12                      | 0                       |                          |                          |                 |                     |         |         |
| 98  | IPI00030959 | C13orf1     | 24 kDa protein                                                                                                                      | Non-raft | 4         | 46/196            | 3                     | 0   | 2   | 0   | 5                       | 0                       | 5                        | 0                        | 5.00            | 1.609               | 0.103   |         |
| 99  | IPI00006980 | C14orf166   | Protein C14orf166                                                                                                                   | Raft     | 10        | 129/244           | 11                    | 0   | 0   | 0   | 11                      | 0                       | 11                       | 0                        | 11.00           | 2.398               | 0.011   |         |
| 100 | IPI00166051 | C14orf24    | Uncharacterized protein C14orf24                                                                                                    | Non-raft | 4         | 48/213            | 4                     | 0   | 4   | 0   | 8                       | 0                       | 8                        | 0                        | 8.00            | 2.079               | 0.030   |         |
| 101 | IPI00056357 | C19orf10    | Uncharacterized protein C19orf10 precursor                                                                                          | Non-raft | 2         | 27/173            | 2                     | 1   | 2   | 0   | 4                       | 1                       | 4                        | 1                        | 4.00            | 1.386               | 0.165   |         |
| 102 | IPI00419849 | C19orf2     | RNA polymerase II subunit 5-mediating protein                                                                                       | Raft     | 3         | 34/535            | 2                     | 2   | 0   | 0   | 2                       | 2                       | 2                        | 2                        | 1.00            | 0.000               | 0.799   |         |
| 103 | IPI00303401 | C1orf75     | FLJ10874 protein                                                                                                                    | Non-raft | 6         | 105/350           | 4                     | 0   | 4   | 0   | 8                       | 0                       | 8                        | 0                        | 8.00            | 2.079               | 0.030   | M       |
| 104 | IPI00024913 | C21orf33    | Isoform Long of ES1 protein homolog, mitochondrial precursor                                                                        | Non-raft | 2         | 27/268            | 2                     | 0   | 0   | 0   | 2                       | 0                       | 2                        | 0                        | 2.00            | 0.693               | 0.473   |         |
| 105 | IPI00550689 | C22orf28    | UPF0027 protein C22orf28                                                                                                            | Non-raft | 3         | 38/505            | 1                     | 1   | 2   | 0   | 3                       | 1                       | 9                        | 3                        | 3.00            | 1.099               | 0.275   |         |
|     | IPI00550689 | C22orf28    | UPF0027 protein C22orf28                                                                                                            | Raft     | 6         | 70/505            | 5                     | 1   | 1   | 1   | 6                       | 2                       |                          |                          |                 |                     |         |         |

| No. | Acc.Number  | Gene Symbol | Description                                                                     | Fraction | Uni. Pep. | Sequence Coverage | Biological Replicates |     |     |     | Total EXP Each Fraction | Total CON Each Fraction | Total EXP Both Fractions | Total CON Both Fractions | EXP/CON Imputed | Ln(EXP/CON imputed) | P-value | 17-ODYA |
|-----|-------------|-------------|---------------------------------------------------------------------------------|----------|-----------|-------------------|-----------------------|-----|-----|-----|-------------------------|-------------------------|--------------------------|--------------------------|-----------------|---------------------|---------|---------|
|     |             |             |                                                                                 |          |           |                   | 1st                   |     | 2nd |     |                         |                         |                          |                          |                 |                     |         |         |
|     |             |             |                                                                                 |          |           |                   | EXP                   | CON | EXP | CON |                         |                         |                          |                          |                 |                     |         |         |
| 106 | IPI00550440 | C2orf18     | Uncharacterized protein C2orf18 precursor                                       | Non-raft | 3         | 25/371            | 7                     | 0   | 2   | 0   | 9                       | 0                       | 11                       | 0                        | 11.00           | 2.398               | 0.011   |         |
|     | IPI00550440 | C2orf18     | Uncharacterized protein C2orf18 precursor                                       | Raft     | 2         | 25/371            | 2                     | 0   | 0   | 0   | 2                       | 0                       |                          |                          |                 |                     |         |         |
| 107 | IPI00024618 | C3orf37     | UPF0361 protein DC12                                                            | Raft     | 4         | 47/354            | 5                     | 0   | 1   | 0   | 6                       | 0                       | 6                        | 0                        | 6.00            | 1.792               | 0.067   |         |
| 108 | IPI00550571 | C5orf15     | Keratinocytes-associated transmembrane protein 2 precursor                      | Non-raft | 2         | 21/265            | 0                     | 0   | 2   | 0   | 2                       | 0                       | 2                        | 0                        | 2.00            | 0.693               | 0.473   |         |
| 109 | IPI00031617 | C6orf125    | Protein C6orf125                                                                | Non-raft | 3         | 34/126            | 2                     | 0   | 2   | 0   | 4                       | 0                       | 4                        | 0                        | 4.00            | 1.386               | 0.165   |         |
| 110 | IPI00007067 | C9orf19     | Golgi-associated plant pathogenesis-related protein 1                           | Raft     | 2         | 26/154            | 2                     | 0   | 0   | 0   | 2                       | 0                       | 2                        | 0                        | 2.00            | 0.693               | 0.473   |         |
| 111 | IPI00012429 | C9orf5      | Isoform 2 of Protein C9orf5                                                     | Non-raft | 2         | 26/886            | 2                     | 0   | 0   | 0   | 2                       | 0                       | 2                        | 0                        | 2.00            | 0.693               | 0.473   |         |
| 112 | IPI00395627 | CACYBP      | Isoform 1 of Calcyclin-binding protein                                          | Non-raft | 3         | 47/228            | 3                     | 0   | 0   | 0   | 3                       | 0                       | 3                        | 0                        | 3.00            | 1.099               | 0.275   |         |
| 113 | IPI00176427 | CADM4       | TSLC1-like 2                                                                    | Non-raft | 4         | 58/388            | 3                     | 0   | 3   | 0   | 6                       | 0                       | 6                        | 0                        | 6.00            | 1.792               | 0.067   |         |
| 114 | IPI00021536 | CALML5      | Calmodulin-like protein 5                                                       | Non-raft | 3         | 48/146            | 1                     | 0   | 0   | 3   | 1                       | 3                       | 1                        | 3                        | 0.33            | -1.099              | 0.988   |         |
| 115 | IPI00020599 | CALR        | Calreticulin precursor                                                          | Non-raft | 3         | 55/417            | 2                     | 3   | 1   | 1   | 3                       | 4                       | 3                        | 4                        | 0.75            | -0.288              | 0.888   |         |
| 116 | IPI00020984 | CANX        | Calnexin precursor                                                              | Non-raft | 24        | 284/627           | 45                    | 2   | 27  | 4   | 72                      | 6                       | 80                       | 7                        | 11.43           | 2.436               | 0.010   | H       |
|     | IPI00020984 | CANX        | Calnexin precursor                                                              | Raft     | 5         | 66/627            | 4                     | 0   | 4   | 1   | 8                       | 1                       |                          |                          |                 |                     |         |         |
| 117 | IPI00008274 | CAP1        | Adenylyl cyclase-associated protein 1                                           | Non-raft | 4         | 72/475            | 3                     | 0   | 1   | 0   | 4                       | 0                       | 4                        | 0                        | 4.00            | 1.386               | 0.165   |         |
| 118 | IPI00643994 | CAPN5       | CDNA FLJ46245 fis, clone TEST14020596, highly similar to Homo sapiens calpain 5 | Non-raft | 2         | 23/680            | 2                     | 0   | 0   | 0   | 2                       | 0                       | 2                        | 0                        | 2.00            | 0.693               | 0.473   |         |
| 119 | IPI00150961 | CAPRIN1     | membrane component chromosome 11 surface marker 1 isoform 1                     | Raft     | 10        | 152/709           | 15                    | 7   | 4   | 4   | 19                      | 11                      | 19                       | 11                       | 1.73            | 0.547               | 0.549   | M       |
| 120 | IPI00026182 | CAPZA2      | F-actin capping protein alpha-2 subunit                                         | Raft     | 3         | 42/286            | 1                     | 1   | 1   | 1   | 2                       | 2                       | 2                        | 2                        | 1.00            | 0.000               | 0.799   |         |
| 121 | IPI00026185 | CAPZB       | Isoform 1 of F-actin capping protein subunit beta                               | Non-raft | 4         | 53/303            | 4                     | 0   | 0   | 0   | 4                       | 0                       | 9                        | 2                        | 4.50            | 1.504               | 0.130   |         |
|     | IPI00026185 | CAPZB       | Isoform 1 of F-actin capping protein subunit beta                               | Raft     | 5         | 63/303            | 4                     | 2   | 1   | 0   | 5                       | 2                       |                          |                          |                 |                     |         |         |
| 122 | IPI00514301 | CASK        | Peripheral plasma membrane protein CASK                                         | Non-raft | 5         | 55/926            | 5                     | 0   | 0   | 0   | 5                       | 0                       | 8                        | 0                        | 8.00            | 2.079               | 0.030   |         |
|     | IPI00514301 | CASK        | Peripheral plasma membrane protein CASK                                         | Raft     | 3         | 30/926            | 3                     | 0   | 0   | 0   | 3                       | 0                       |                          |                          |                 |                     |         |         |
| 123 | IPI00013885 | CASP14      | Caspase-14 precursor                                                            | Non-raft | 2         | 22/242            | 1                     | 2   | 0   | 0   | 1                       | 2                       | 1                        | 2                        | 0.50            | -0.693              | 0.959   |         |
| 124 | IPI00465436 | CAT         | Catalase                                                                        | Non-raft | 4         | 61/527            | 4                     | 3   | 0   | 0   | 4                       | 3                       | 4                        | 3                        | 1.33            | 0.288               | 0.678   |         |
| 125 | IPI00009236 | CAV1        | Caveolin 1                                                                      | Non-raft | 9         | 89/178            | 11                    | 0   | 14  | 0   | 25                      | 0                       | 47                       | 0                        | 47.00           | 3.850               | 0.000   |         |
|     | IPI00009236 | CAV1        | Caveolin 1                                                                      | Raft     | 11        | 130/178           | 13                    | 0   | 9   | 0   | 22                      | 0                       |                          |                          |                 |                     |         |         |
| 126 | IPI00019870 | CAV2        | Isoform Alpha of Caveolin-2                                                     | Non-raft | 2         | 42/162            | 0                     | 0   | 4   | 0   | 4                       | 0                       | 10                       | 0                        | 10.00           | 2.303               | 0.015   |         |
|     | IPI00019870 | CAV2        | Isoform Alpha of Caveolin-2                                                     | Raft     | 3         | 42/162            | 2                     | 0   | 4   | 0   | 6                       | 0                       |                          |                          |                 |                     |         |         |
| 127 | IPI00410093 | CCDC69      | coiled-coil domain containing 69                                                | Raft     | 2         | 23/296            | 2                     | 0   | 0   | 0   | 2                       | 0                       | 2                        | 0                        | 2.00            | 0.693               | 0.473   |         |
| 128 | IPI00334743 | CCNY        | Isoform 2 of Cyclin fold protein 1                                              | Non-raft | 5         | 63/316            | 4                     | 0   | 1   | 0   | 5                       | 0                       | 9                        | 0                        | 9.00            | 2.197               | 0.021   | H       |
|     | IPI00334743 | CCNY        | Isoform 2 of Cyclin fold protein 1                                              | Raft     | 3         | 43/316            | 2                     | 0   | 2   | 0   | 4                       | 0                       |                          |                          |                 |                     |         |         |
| 129 | IPI00185371 | CCNYL1      | CDNA FLJ40432 fis, clone TEST12039227                                           | Non-raft | 5         | 51/289            | 5                     | 0   | 1   | 0   | 6                       | 0                       | 6                        | 0                        | 6.00            | 1.792               | 0.067   | M       |
| 130 | IPI00297779 | CCT2        | T-complex protein 1 subunit beta                                                | Non-raft | 9         | 131/535           | 7                     | 5   | 2   | 3   | 9                       | 8                       | 12                       | 12                       | 1.00            | 0.000               | 0.799   | H       |
|     | IPI00297779 | CCT2        | T-complex protein 1 subunit beta                                                | Raft     | 6         | 80/535            | 3                     | 4   | 0   | 0   | 3                       | 4                       |                          |                          |                 |                     |         |         |
| 131 | IPI00290770 | CCT3        | chaperonin containing TCP1, subunit 3 isoform b                                 | Non-raft | 5         | 60/544            | 4                     | 3   | 1   | 2   | 5                       | 5                       | 5                        | 5                        | 1.00            | 0.000               | 0.799   |         |
| 132 | IPI00302927 | CCT4        | T-complex protein 1 subunit delta                                               | Non-raft | 9         | 126/539           | 6                     | 5   | 2   | 2   | 8                       | 7                       | 8                        | 7                        | 1.14            | 0.134               | 0.747   |         |
| 133 | IPI00010720 | CCT5        | T-complex protein 1 subunit epsilon                                             | Non-raft | 6         | 69/541            | 3                     | 4   | 3   | 3   | 6                       | 7                       | 9                        | 11                       | 0.82            | -0.201              | 0.864   | H       |
|     | IPI00010720 | CCT5        | T-complex protein 1 subunit epsilon                                             | Raft     | 5         | 63/541            | 3                     | 4   | 0   | 0   | 3                       | 4                       |                          |                          |                 |                     |         |         |
| 134 | IPI00027626 | CCT6A       | T-complex protein 1 subunit zeta                                                | Non-raft | 6         | 103/531           | 3                     | 4   | 3   | 1   | 6                       | 5                       | 7                        | 6                        | 1.17            | 0.154               | 0.738   |         |
|     | IPI00027626 | CCT6A       | T-complex protein 1 subunit zeta                                                | Raft     | 2         | 37/531            | 1                     | 1   | 0   | 0   | 1                       | 1                       |                          |                          |                 |                     |         |         |
| 135 | IPI00018465 | CCT7        | T-complex protein 1 subunit eta                                                 | Non-raft | 6         | 101/543           | 6                     | 3   | 1   | 0   | 7                       | 3                       | 7                        | 3                        | 2.33            | 0.847               | 0.394   |         |
| 136 | IPI00302925 | CCT8        | Chaperonin containing TCP1, subunit 8                                           | Non-raft | 15        | 167/547           | 9                     | 8   | 6   | 3   | 15                      | 11                      | 22                       | 18                       | 1.22            | 0.201               | 0.718   |         |
|     | IPI00302925 | CCT8        | Chaperonin containing TCP1, subunit 8                                           | Raft     | 10        | 117/547           | 6                     | 7   | 1   | 0   | 7                       | 7                       |                          |                          |                 |                     |         |         |
| 137 | IPI00298851 | CD151       | CD151 antigen                                                                   | Non-raft | 3         | 32/253            | 7                     | 0   | 6   | 0   | 13                      | 0                       | 13                       | 0                        | 13.00           | 2.565               | 0.006   |         |
| 138 | IPI00410488 | CD276       | Isoform 1 of CD276 antigen precursor                                            | Non-raft | 4         | 68/534            | 4                     | 0   | 1   | 0   | 5                       | 0                       | 5                        | 0                        | 5.00            | 1.609               | 0.103   |         |
| 139 | IPI00297160 | CD44        | CD44 antigen isoform 4 precursor                                                | Non-raft | 15        | 141/361           | 46                    | 5   | 22  | 0   | 68                      | 5                       | 137                      | 6                        | 22.83           | 3.128               | 0.001   |         |
|     | IPI00297160 | CD44        | CD44 antigen isoform 4 precursor                                                | Raft     | 14        | 125/361           | 55                    | 0   | 14  | 1   | 69                      | 1                       |                          |                          |                 |                     |         |         |
| 140 | IPI00219852 | CD46        | Isoform B of Membrane cofactor protein precursor                                | Non-raft | 5         | 23/399            | 5                     | 1   | 5   | 1   | 10                      | 2                       | 10                       | 2                        | 5.00            | 1.609               | 0.103   |         |

| No. | Acc.Number  | Gene Symbol | Description                                                     | Fraction | Uni. Pep. | Sequence Coverage | Biological Replicates |     |     |     | Total EXP Each Fraction | Total CON Each Fraction | Total EXP Both Fractions | Total CON Both Fractions | EXP/CON Imputed | Ln(EXP/CON imputed) | P-value | 17-ODYA |
|-----|-------------|-------------|-----------------------------------------------------------------|----------|-----------|-------------------|-----------------------|-----|-----|-----|-------------------------|-------------------------|--------------------------|--------------------------|-----------------|---------------------|---------|---------|
|     |             |             |                                                                 |          |           |                   | 1st                   |     | 2nd |     |                         |                         |                          |                          |                 |                     |         |         |
|     |             |             |                                                                 |          |           |                   | EXP                   | CON | EXP | CON |                         |                         |                          |                          |                 |                     |         |         |
| 141 | IPI00152418 | CD55        | Decay-accelerating factor splicing variant 4                    | Raft     | 2         | 18/525            | 1                     | 1   | 1   | 1   | 2                       | 2                       | 2                        | 2                        | 1.00            | 0.000               | 0.799   |         |
| 142 | IPI00000059 | CD58        | LFA-3                                                           | Non-raft | 2         | 12/162            | 2                     | 0   | 1   | 0   | 3                       | 0                       | 3                        | 0                        | 3.00            | 1.099               | 0.275   |         |
| 143 | IPI00215998 | CD63        | CD63 antigen                                                    | Non-raft | 4         | 38/238            | 10                    | 2   | 7   | 0   | 17                      | 2                       | 21                       | 2                        | 10.50           | 2.351               | 0.013   |         |
|     | IPI00215998 | CD63        | CD63 antigen                                                    | Raft     | 2         | 12/238            | 4                     | 0   | 0   | 0   | 4                       | 0                       |                          |                          |                 |                     |         |         |
| 144 | IPI00031713 | CD70        | Tumor necrosis factor ligand superfamily member 7               | Non-raft | 6         | 77/193            | 13                    | 1   | 5   | 0   | 18                      | 1                       | 18                       | 1                        | 18.00           | 2.890               | 0.002   |         |
| 145 | IPI00000190 | CD81        | CD81 antigen                                                    | Non-raft | 3         | 27/236            | 10                    | 0   | 10  | 0   | 20                      | 0                       | 26                       | 0                        | 26.00           | 3.258               | 0.000   | M       |
|     | IPI00000190 | CD81        | CD81 antigen                                                    | Raft     | 2         | 23/236            | 4                     | 0   | 2   | 0   | 6                       | 0                       |                          |                          |                 |                     |         |         |
| 146 | IPI00215997 | CD9         | CD9 antigen                                                     | Non-raft | 3         | 47/228            | 9                     | 1   | 14  | 0   | 23                      | 1                       | 26                       | 1                        | 26.00           | 3.258               | 0.000   |         |
|     | IPI00215997 | CD9         | CD9 antigen                                                     | Raft     | 2         | 22/228            | 2                     | 0   | 1   | 0   | 3                       | 0                       |                          |                          |                 |                     |         |         |
| 147 | IPI00299412 | CD97        | Isoform 2 of CD97 antigen precursor                             | Non-raft | 6         | 70/742            | 7                     | 6   | 9   | 4   | 16                      | 10                      | 16                       | 10                       | 1.60            | 0.470               | 0.589   |         |
| 148 | IPI00016786 | CDC42       | Isoform 2 of Cell division control protein 42 homolog precursor | Non-raft | 5         | 79/191            | 5                     | 1   | 5   | 2   | 10                      | 3                       | 10                       | 3                        | 3.33            | 1.204               | 0.231   |         |
| 149 | IPI00024973 | CDC42SE2    | CDC42 small effector 2                                          | Non-raft | 2         | 21/84             | 4                     | 0   | 1   | 0   | 5                       | 0                       | 5                        | 0                        | 5.00            | 1.609               | 0.103   | M       |
| 150 | IPI00290039 | CDCP1       | Isoform 1 of CUB domain-containing protein 1 precursor          | Non-raft | 8         | 113/836           | 6                     | 0   | 4   | 0   | 10                      | 0                       | 16                       | 0                        | 16.00           | 2.773               | 0.003   |         |
|     | IPI00290039 | CDCP1       | Isoform 1 of CUB domain-containing protein 1 precursor          | Raft     | 5         | 77/836            | 4                     | 0   | 2   | 0   | 6                       | 0                       |                          |                          |                 |                     |         |         |
| 151 | IPI00000685 | CDK7        | Cell division protein kinase 7                                  | Raft     | 2         | 24/346            | 1                     | 1   | 0   | 0   | 1                       | 1                       | 1                        | 1                        | 1.00            | 0.000               | 0.799   |         |
| 152 | IPI00015713 | CDKAL1      | CDK5 regulatory subunit associated protein 1-like 1             | Non-raft | 3         | 39/579            | 2                     | 0   | 1   | 0   | 3                       | 0                       | 3                        | 0                        | 3.00            | 1.099               | 0.275   |         |
| 153 | IPI00012011 | CFL1        | Cofilin-1                                                       | Non-raft | 7         | 90/166            | 5                     | 5   | 6   | 5   | 11                      | 10                      | 20                       | 15                       | 1.33            | 0.288               | 0.678   |         |
|     | IPI00012011 | CFL1        | Cofilin-1                                                       | Raft     | 6         | 82/166            | 6                     | 3   | 3   | 2   | 9                       | 5                       |                          |                          |                 |                     |         |         |
| 154 | IPI00413344 | CFL2        | Cofilin-2                                                       | Non-raft | 5         | 68/166            | 3                     | 2   | 3   | 1   | 6                       | 3                       | 10                       | 4                        | 2.50            | 0.916               | 0.360   |         |
|     | IPI00413344 | CFL2        | Cofilin-2                                                       | Raft     | 4         | 60/166            | 4                     | 1   | 0   | 0   | 4                       | 1                       |                          |                          |                 |                     |         |         |
| 155 | IPI00141318 | CKAP4       | Isoform 1 of Cytoskeleton-associated protein 4                  | Non-raft | 26        | 324/602           | 29                    | 1   | 20  | 0   | 49                      | 1                       | 98                       | 1                        | 98.00           | 4.585               | 0.000   |         |
|     | IPI00141318 | CKAP4       | Isoform 1 of Cytoskeleton-associated protein 4                  | Raft     | 23        | 300/602           | 28                    | 0   | 21  | 0   | 49                      | 0                       |                          |                          |                 |                     |         |         |
| 156 | IPI00022977 | CKB         | Creatine kinase B-type                                          | Non-raft | 5         | 62/381            | 3                     | 3   | 1   | 1   | 4                       | 4                       | 4                        | 4                        | 1.00            | 0.000               | 0.799   |         |
| 157 | IPI00045511 | CLCC1       | Mid-1-related chloride channel 1 isoform 1                      | Non-raft | 2         | 22/551            | 2                     | 0   | 0   | 0   | 2                       | 0                       | 2                        | 0                        | 2.00            | 0.693               | 0.473   |         |
| 158 | IPI00000691 | CLDN1       | Claudin-1                                                       | Non-raft | 3         | 42/211            | 4                     | 0   | 1   | 0   | 5                       | 0                       | 5                        | 0                        | 5.00            | 1.609               | 0.103   |         |
| 159 | IPI00059710 | CLDN23      | Claudin-23                                                      | Raft     | 5         | 80/292            | 5                     | 0   | 1   | 0   | 6                       | 0                       | 6                        | 0                        | 6.00            | 1.792               | 0.067   |         |
| 160 | IPI00007364 | CLDN3       | Claudin-3                                                       | Non-raft | 5         | 44/220            | 3                     | 0   | 3   | 0   | 6                       | 0                       | 8                        | 0                        | 8.00            | 2.079               | 0.030   |         |
|     | IPI00007364 | CLDN3       | Claudin-3                                                       | Raft     | 2         | 15/220            | 2                     | 0   | 0   | 0   | 2                       | 0                       |                          |                          |                 |                     |         |         |
| 161 | IPI00072743 | CLDND1      | Isoform 1 of Claudin domain-containing protein 1                | Raft     | 5         | 62/253            | 7                     | 0   | 1   | 0   | 8                       | 0                       | 8                        | 0                        | 8.00            | 2.079               | 0.030   |         |
| 162 | IPI00024776 | CLGN        | Calmegin precursor                                              | Non-raft | 2         | 20/610            | 2                     | 0   | 0   | 0   | 2                       | 0                       | 2                        | 0                        | 2.00            | 0.693               | 0.473   | M       |
| 163 | IPI00010896 | CLIC1       | Chloride intracellular channel protein 1                        | Non-raft | 6         | 87/241            | 5                     | 1   | 1   | 2   | 6                       | 3                       | 6                        | 3                        | 2.00            | 0.693               | 0.473   |         |
| 164 | IPI00001960 | CLIC4       | Chloride intracellular channel protein 4                        | Non-raft | 2         | 21/253            | 2                     | 0   | 0   | 0   | 2                       | 0                       | 2                        | 0                        | 2.00            | 0.693               | 0.473   |         |
| 165 | IPI00024067 | CLTC        | clathrin heavy chain 1                                          | Non-raft | 28        | 394/1675          | 19                    | 18  | 7   | 7   | 26                      | 25                      | 40                       | 33                       | 1.21            | 0.192               | 0.721   | H       |
|     | IPI00024067 | CLTC        | clathrin heavy chain 1                                          | Raft     | 14        | 175/1675          | 10                    | 6   | 4   | 2   | 14                      | 8                       |                          |                          |                 |                     |         |         |
| 166 | IPI00430813 | CNBP        | Isoform 2 of Cellular nucleic acid-binding protein              | Non-raft | 4         | 45/170            | 4                     | 1   | 0   | 0   | 4                       | 1                       | 4                        | 1                        | 4.00            | 1.386               | 0.165   |         |
| 167 | IPI00015262 | CNN2        | Calponin-2                                                      | Non-raft | 2         | 35/309            | 0                     | 2   | 0   | 0   | 0                       | 2                       | 0                        | 2                        | 0.50            | -0.693              | 0.959   |         |
| 168 | IPI00166010 | CNOT1       | CCR4-NOT transcription complex, subunit 1 isoform a             | Raft     | 6         | 64/2376           | 4                     | 4   | 0   | 0   | 4                       | 4                       | 4                        | 4                        | 1.00            | 0.000               | 0.799   | M       |
| 169 | IPI00006552 | CNOT7       | CCR4-NOT transcription complex subunit 7                        | Raft     | 2         | 25/285            | 1                     | 2   | 0   | 0   | 1                       | 2                       | 1                        | 2                        | 0.50            | -0.693              | 0.959   |         |
| 170 | IPI00220993 | CNP         | Isoform CNPI of 2',3'-cyclic-nucleotide 3'-phosphodiesterase    | Non-raft | 2         | 49/401            | 2                     | 0   | 2   | 0   | 4                       | 0                       | 4                        | 0                        | 4.00            | 1.386               | 0.165   |         |
| 171 | IPI00011284 | COMT        | Isoform Membrane-bound of Catechol O-methyltransferase          | Non-raft | 5         | 66/271            | 6                     | 0   | 3   | 0   | 9                       | 0                       | 9                        | 0                        | 9.00            | 2.197               | 0.021   |         |
| 172 | IPI00295857 | COPA        | Coatomer subunit alpha                                          | Non-raft | 13        | 167/1224          | 3                     | 5   | 7   | 2   | 10                      | 7                       | 10                       | 7                        | 1.43            | 0.357               | 0.645   | M       |
| 173 | IPI00295851 | COPB1       | Coatomer subunit beta                                           | Non-raft | 4         | 62/953            | 4                     | 2   | 1   | 1   | 5                       | 3                       | 5                        | 3                        | 1.67            | 0.511               | 0.568   |         |
| 174 | IPI00220219 | COPB2       | Coatomer subunit beta'                                          | Non-raft | 6         | 64/906            | 3                     | 5   | 1   | 1   | 4                       | 6                       | 4                        | 6                        | 0.67            | -0.405              | 0.914   |         |
| 175 | IPI00001890 | COPG        | 98 kDa protein                                                  | Non-raft | 3         | 38/874            | 0                     | 0   | 0   | 4   | 0                       | 4                       | 0                        | 4                        | 0.25            | -1.386              | 0.996   |         |
| 176 | IPI00007058 | CORO1B      | Coronin-1B                                                      | Non-raft | 4         | 65/489            | 4                     | 1   | 0   | 0   | 4                       | 1                       | 4                        | 1                        | 4.00            | 1.386               | 0.165   |         |
| 177 | IPI00008453 | CORO1C      | Coronin-1C                                                      | Non-raft | 7         | 99/527            | 6                     | 2   | 2   | 2   | 8                       | 4                       | 33                       | 28                       | 1.18            | 0.164               | 0.734   |         |
|     | IPI00008453 | CORO1C      | Coronin-1C                                                      | Raft     | 20        | 254/527           | 18                    | 17  | 7   | 7   | 25                      | 24                      |                          |                          |                 |                     |         |         |
| 178 | IPI00017510 | COX2        | Cytochrome c oxidase subunit 2                                  | Non-raft | 4         | 53/227            | 0                     | 1   | 3   | 1   | 3                       | 2                       | 3                        | 2                        | 1.50            | 0.405               | 0.621   |         |

| No. | Acc.Number  | Gene Symbol | Description                                                                 | Fraction | Uni. Pep. | Sequence Coverage | Biological Replicates |     |     |     | Total EXP Each Fraction | Total CON Each Fraction | Total EXP Both Fractions | Total CON Both Fractions | EXP/CON Imputed | Ln(EXP/CON imputed) | P-value | 17-ODYA |
|-----|-------------|-------------|-----------------------------------------------------------------------------|----------|-----------|-------------------|-----------------------|-----|-----|-----|-------------------------|-------------------------|--------------------------|--------------------------|-----------------|---------------------|---------|---------|
|     |             |             |                                                                             |          |           |                   | 1st                   |     | 2nd |     |                         |                         |                          |                          |                 |                     |         |         |
|     |             |             |                                                                             |          |           |                   | EXP                   | CON | EXP | CON |                         |                         |                          |                          |                 |                     |         |         |
| 179 | IPI00027078 | CPD         | Carboxypeptidase D precursor                                                | Non-raft | 5         | 52/1380           | 4                     | 0   | 1   | 0   | 5                       | 0                       | 5                        | 0                        | 5.00            | 1.609               | 0.103   | H       |
| 180 | IPI00026270 | CPM         | Carboxypeptidase M precursor                                                | Raft     | 2         | 18/443            | 1                     | 1   | 0   | 0   | 1                       | 1                       | 1                        | 1                        | 1.00            | 0.000               | 0.799   |         |
| 181 | IPI00032038 | CPT1A       | Isoform 1 of Carnitine O-palmitoyltransferase I, liver isoform              | Non-raft | 3         | 39/773            | 3                     | 1   | 1   | 0   | 4                       | 1                       | 4                        | 1                        | 4.00            | 1.386               | 0.165   | M       |
| 182 | IPI00016457 | CRAT        | Isoform 1 of Carnitine O-acetyltransferase                                  | Non-raft | 2         | 26/626            | 0                     | 1   | 1   | 0   | 1                       | 1                       | 1                        | 1                        | 1.00            | 0.000               | 0.799   |         |
| 183 | IPI00025366 | CS          | Citrate synthase, mitochondrial precursor                                   | Non-raft | 2         | 27/466            | 0                     | 1   | 0   | 1   | 0                       | 2                       | 0                        | 0.50                     | -0.693          | 0.959               |         |         |
| 184 | IPI00219823 | CSNK1G1     | Isoform 1S of Casein kinase I isoform gamma-1                               | Raft     | 4         | 58/393            | 4                     | 0   | 0   | 0   | 4                       | 0                       | 4                        | 0                        | 4.00            | 1.386               | 0.165   | M       |
| 185 | IPI00297767 | CSNK1G2     | Casein kinase I isoform gamma-2                                             | Non-raft | 2         | 30/415            | 0                     | 0   | 2   | 0   | 2                       | 0                       | 6                        | 0                        | 6.00            | 1.792               | 0.067   |         |
|     | IPI00297767 | CSNK1G2     | Casein kinase I isoform gamma-2                                             | Raft     | 4         | 52/415            | 4                     | 0   | 0   | 0   | 4                       | 0                       |                          |                          |                 |                     |         |         |
| 186 | IPI00181294 | CSNK1G3     | Isoform 1 of Casein kinase I isoform gamma-3                                | Raft     | 9         | 139/447           | 9                     | 0   | 3   | 0   | 12                      | 0                       | 12                       | 0                        | 12.00           | 2.485               | 0.008   | M       |
| 187 | IPI00442073 | CSRP1       | Cysteine and glycine-rich protein 1                                         | Non-raft | 2         | 25/193            | 1                     | 1   | 1   | 0   | 2                       | 1                       | 2                        | 1                        | 2.00            | 0.693               | 0.473   |         |
| 188 | IPI00009633 | CTDSP1      | Carboxy-terminal domain RNA polymerase II polypeptide A small phosphatase 1 | Non-raft | 5         | 55/261            | 4                     | 0   | 4   | 0   | 8                       | 0                       | 14                       | 0                        | 14.00           | 2.639               | 0.005   | M       |
|     | IPI00009633 | CTDSP1      | Carboxy-terminal domain RNA polymerase II polypeptide A small phosphatase 1 | Raft     | 4         | 46/261            | 4                     | 0   | 2   | 0   | 6                       | 0                       |                          |                          |                 |                     |         |         |
| 189 | IPI00024826 | CTDSPL      | CTD small phosphatase-like protein                                          | Non-raft | 2         | 21/340            | 0                     | 0   | 3   | 0   | 3                       | 0                       | 3                        | 0                        | 3.00            | 1.099               | 0.275   |         |
| 190 | IPI00215948 | CTNNA1      | Isoform 1 of Catenin alpha-1                                                | Non-raft | 7         | 105/906           | 5                     | 2   | 0   | 0   | 5                       | 2                       | 10                       | 3                        | 3.33            | 1.204               | 0.231   |         |
|     | IPI00215948 | CTNNA1      | Isoform 1 of Catenin alpha-1                                                | Raft     | 5         | 81/906            | 5                     | 1   | 0   | 0   | 5                       | 1                       |                          |                          |                 |                     |         |         |
| 191 | IPI00017292 | CTNNB1      | Isoform 1 of Catenin beta-1                                                 | Non-raft | 6         | 65/781            | 6                     | 2   | 0   | 0   | 6                       | 2                       | 6                        | 2                        | 3.00            | 1.099               | 0.275   |         |
| 192 | IPI00182469 | CTNND1      | Isoform 1AB of Catenin delta-1                                              | Non-raft | 28        | 388/963           | 35                    | 1   | 24  | 1   | 59                      | 2                       | 68                       | 2                        | 34.00           | 3.526               | 0.000   |         |
|     | IPI00182469 | CTNND1      | Isoform 1AB of Catenin delta-1                                              | Raft     | 9         | 152/963           | 8                     | 0   | 1   | 0   | 9                       | 0                       |                          |                          |                 |                     |         |         |
| 193 | IPI00019146 | CXADR       | Isoform 1 of Coxsackievirus and adenovirus receptor precursor               | Non-raft | 14        | 207/365           | 23                    | 0   | 16  | 0   | 39                      | 0                       | 41                       | 0                        | 41.00           | 3.714               | 0.000   |         |
|     | IPI00019146 | CXADR       | Isoform 1 of Coxsackievirus and adenovirus receptor precursor               | Raft     | 2         | 25/365            | 2                     | 0   | 0   | 0   | 2                       | 0                       |                          |                          |                 |                     |         |         |
| 194 | IPI00019994 | CXorf15     | Gamma-taxilin                                                               | Raft     | 2         | 20/528            | 2                     | 0   | 0   | 0   | 2                       | 0                       | 2                        | 0                        | 2.00            | 0.693               | 0.473   |         |
| 195 | IPI00303954 | CYB5B       | cytochrome b5 outer mitochondrial membrane precursor                        | Non-raft | 4         | 70/150            | 3                     | 0   | 2   | 0   | 5                       | 0                       | 5                        | 0                        | 5.00            | 1.609               | 0.103   |         |
| 196 | IPI00102928 | CYB5D2      | Cytochrome b5 domain containing 2                                           | Non-raft | 2         | 27/264            | 2                     | 0   | 0   | 0   | 2                       | 0                       | 2                        | 0                        | 2.00            | 0.693               | 0.473   |         |
| 197 | IPI00029264 | CYC1        | Cytochrome c1, heme protein, mitochondrial precursor                        | Non-raft | 2         | 28/325            | 1                     | 1   | 1   | 1   | 2                       | 2                       | 2                        | 2                        | 1.00            | 0.000               | 0.799   |         |
| 198 | IPI00644231 | CYFIP1      | cytoplasmic FMR1 interacting protein 1 isoform a                            | Non-raft | 4         | 46/1253           | 3                     | 1   | 0   | 0   | 3                       | 1                       | 3                        | 1                        | 3.00            | 1.099               | 0.275   |         |
| 199 | IPI00337800 | DAAM1       | Isoform 1 of Disheveled-associated activator of morphogenesis 1             | Non-raft | 5         | 62/1078           | 4                     | 0   | 2   | 0   | 6                       | 0                       | 6                        | 0                        | 6.00            | 1.792               | 0.067   | M       |
| 200 | IPI00385987 | DAGLB       | Isoform 1 of Sn1-specific diacylglycerol lipase beta                        | Non-raft | 7         | 91/717            | 6                     | 0   | 5   | 0   | 11                      | 0                       | 11                       | 0                        | 11.00           | 2.398               | 0.011   | H       |
| 201 | IPI00216951 | DARS        | Aspartyl-tRNA synthetase, cytoplasmic                                       | Non-raft | 7         | 97/501            | 4                     | 4   | 1   | 1   | 5                       | 5                       | 5                        | 5                        | 1.00            | 0.000               | 0.799   |         |
| 202 | IPI00003406 | DBN1        | Drebrin                                                                     | Raft     | 10        | 119/649           | 9                     | 3   | 1   | 0   | 10                      | 3                       | 10                       | 3                        | 3.33            | 1.204               | 0.231   |         |
| 203 | IPI00027547 | DCD         | Dermcidin precursor                                                         | Non-raft | 2         | 14/110            | 1                     | 2   | 0   | 0   | 1                       | 2                       | 3                        | 9                        | 0.33            | -1.099              | 0.988   |         |
|     | IPI00027547 | DCD         | Dermcidin precursor                                                         | Raft     | 2         | 28/110            | 2                     | 7   | 0   | 0   | 2                       | 7                       |                          |                          |                 |                     |         |         |
| 204 | IPI00300567 | DCI         | Isoform 1 of 3,2-trans-enoyl-CoA isomerase, mitochondrial precursor         | Non-raft | 4         | 41/302            | 4                     | 1   | 0   | 0   | 4                       | 1                       | 4                        | 1                        | 4.00            | 1.386               | 0.165   |         |
| 205 | IPI00217282 | DCUN1D3     | DCN1, defective in cullin neddylation 1, domain containing 3                | Non-raft | 4         | 64/304            | 4                     | 0   | 3   | 0   | 7                       | 0                       | 20                       | 0                        | 20.00           | 2.996               | 0.001   |         |
|     | IPI00217282 | DCUN1D3     | DCN1, defective in cullin neddylation 1, domain containing 3                | Raft     | 9         | 127/304           | 7                     | 0   | 6   | 0   | 13                      | 0                       |                          |                          |                 |                     |         |         |
| 206 | IPI00297084 | DDOST       | dolichyl-diphosphooligosaccharide-protein glycosyltransferase precursor     | Non-raft | 11        | 149/456           | 11                    | 9   | 7   | 1   | 18                      | 10                      | 22                       | 12                       | 1.83            | 0.606               | 0.519   |         |
|     | IPI00297084 | DDOST       | dolichyl-diphosphooligosaccharide-protein glycosyltransferase precursor     | Raft     | 5         | 75/456            | 2                     | 2   | 2   | 0   | 4                       | 2                       |                          |                          |                 |                     |         |         |
| 207 | IPI00293655 | DDX1        | ATP-dependent RNA helicase DDX1                                             | Raft     | 4         | 69/740            | 4                     | 4   | 0   | 0   | 4                       | 4                       | 4                        | 4                        | 1.00            | 0.000               | 0.799   |         |
| 208 | IPI00023785 | DDX17       | Isoform 1 of Probable ATP-dependent RNA helicase DDX17                      | Non-raft | 8         | 96/729            | 6                     | 4   | 2   | 1   | 8                       | 5                       | 18                       | 17                       | 1.06            | 0.057               | 0.777   |         |
|     | IPI00023785 | DDX17       | Isoform 1 of Probable ATP-dependent RNA helicase DDX17                      | Raft     | 10        | 122/729           | 7                     | 8   | 3   | 4   | 10                      | 12                      |                          |                          |                 |                     |         |         |
| 209 | IPI00215637 | DDX3X       | ATP-dependent RNA helicase DDX3X                                            | Non-raft | 6         | 83/662            | 5                     | 1   | 4   | 2   | 9                       | 3                       | 13                       | 7                        | 1.86            | 0.619               | 0.512   |         |
|     | IPI00215637 | DDX3X       | ATP-dependent RNA helicase DDX3X                                            | Raft     | 4         | 52/662            | 3                     | 3   | 1   | 1   | 4                       | 4                       |                          |                          |                 |                     |         |         |
| 210 | IPI00017617 | DDX5        | Probable ATP-dependent RNA helicase DDX5                                    | Non-raft | 4         | 49/614            | 3                     | 2   | 0   | 1   | 3                       | 3                       | 7                        | 12                       | 0.58            | -0.539              | 0.938   |         |
|     | IPI00017617 | DDX5        | Probable ATP-dependent RNA helicase DDX5                                    | Raft     | 6         | 68/614            | 2                     | 5   | 2   | 4   | 4                       | 9                       |                          |                          |                 |                     |         |         |

| No. | Acc.Number  | Gene Symbol   | Description                                                                                                                | Fraction | Uni. Pep. | Sequence Coverage | Biological Replicates |     |     |     | Total EXP Each Fraction | Total CON Each Fraction | Total EXP Both Fractions | Total CON Both Fractions | EXP/CON Imputed | Ln(EXP/CON imputed) | P-value | 17-ODYA |
|-----|-------------|---------------|----------------------------------------------------------------------------------------------------------------------------|----------|-----------|-------------------|-----------------------|-----|-----|-----|-------------------------|-------------------------|--------------------------|--------------------------|-----------------|---------------------|---------|---------|
|     |             |               |                                                                                                                            |          |           |                   | 1st                   |     | 2nd |     |                         |                         |                          |                          |                 |                     |         |         |
|     |             |               |                                                                                                                            |          |           |                   | EXP                   | CON | EXP | CON |                         |                         |                          |                          |                 |                     |         |         |
| 211 | IPI00030320 | DDX6          | Probable ATP-dependent RNA helicase DDX6                                                                                   | Non-raft | 2         | 26/483            | 1                     | 0   | 2   | 0   | 3                       | 0                       | 6                        | 1                        | 6.00            | 1.792               | 0.067   |         |
|     | IPI00030320 | DDX6          | Probable ATP-dependent RNA helicase DDX6                                                                                   | Raft     | 3         | 42/483            | 2                     | 0   | 1   | 1   | 3                       | 1                       |                          |                          |                 |                     |         |         |
| 212 | IPI00003482 | DECRI         | 2,4-dienoyl-CoA reductase, mitochondrial precursor                                                                         | Raft     | 5         | 72/335            | 5                     | 1   | 0   | 0   | 5                       | 1                       | 5                        | 1                        | 5.00            | 1.609               | 0.103   |         |
| 213 | IPI00382990 | DERP12        | DERP12                                                                                                                     | Non-raft | 12        | 134/343           | 14                    | 9   | 9   | 5   | 23                      | 14                      | 152                      | 93                       | 1.63            | 0.491               | 0.578   |         |
|     | IPI00382990 | DERP12        | DERP12                                                                                                                     | Raft     | 28        | 286/343           | 74                    | 55  | 55  | 24  | 129                     | 79                      |                          |                          |                 |                     |         |         |
| 214 | IPI00294501 | DHCR7         | 7-dehydrocholesterol reductase                                                                                             | Non-raft | 3         | 32/475            | 3                     | 2   | 1   | 0   | 4                       | 2                       | 4                        | 2                        | 2.00            | 0.693               | 0.473   |         |
| 215 | IPI00396435 | DHX15         | DEAH (Asp-Glu-Ala-His) box polypeptide 15                                                                                  | Raft     | 7         | 86/795            | 8                     | 6   | 1   | 1   | 9                       | 7                       | 9                        | 7                        | 1.29            | 0.251               | 0.695   |         |
| 216 | IPI00411733 | DHX30         | Putative ATP-dependent RNA helicase DHX30                                                                                  | Non-raft | 2         | 19/1194           | 0                     | 1   | 0   | 1   | 0                       | 2                       | 0                        | 2                        | 0.50            | -0.693              | 0.959   |         |
| 217 | IPI00027415 | DHX36         | Isoform 1 of Probable ATP-dependent RNA helicase DHX36                                                                     | Raft     | 3         | 39/1008           | 2                     | 3   | 0   | 0   | 2                       | 3                       | 2                        | 3                        | 0.67            | -0.405              | 0.914   |         |
| 218 | IPI00844578 | DHX9          | ATP-dependent RNA helicase A                                                                                               | Non-raft | 10        | 110/1270          | 8                     | 6   | 1   | 3   | 9                       | 9                       | 33                       | 20                       | 1.65            | 0.501               | 0.573   |         |
|     | IPI00844578 | DHX9          | ATP-dependent RNA helicase A                                                                                               | Raft     | 18        | 250/1270          | 18                    | 10  | 6   | 1   | 24                      | 11                      |                          |                          |                 |                     |         |         |
| 219 | IPI00003269 | DKFZp686D0972 | hypothetical protein LOC345651                                                                                             | Raft     | 6         | 67/376            | 6                     | 4   | 0   | 0   | 6                       | 4                       | 6                        | 4                        | 1.50            | 0.405               | 0.621   |         |
| 220 | IPI00021338 | DLAT          | Dihydrolipoyllysine-residue acetyltransferase component of pyruvate dehydrogenase complex, mitochondrial precursor         | Non-raft | 8         | 108/614           | 7                     | 1   | 9   | 2   | 16                      | 3                       | 23                       | 5                        | 4.60            | 1.526               | 0.124   |         |
|     | IPI00021338 | DLAT          | Dihydrolipoyllysine-residue acetyltransferase component of pyruvate dehydrogenase complex, mitochondrial precursor         | Raft     | 5         | 77/614            | 4                     | 1   | 3   | 1   | 7                       | 2                       |                          |                          |                 |                     |         |         |
| 221 | IPI00015911 | DLD           | Dihydrolipoyl dehydrogenase, mitochondrial precursor                                                                       | Non-raft | 5         | 56/509            | 3                     | 4   | 1   | 1   | 4                       | 5                       | 4                        | 5                        | 0.80            | -0.223              | 0.871   |         |
| 222 | IPI00420108 | DLST          | Dihydrolipoyllysine-residue succinyltransferase component of 2-oxoglutarate dehydrogenase complex, mitochondrial precursor | Non-raft | 7         | 94/453            | 8                     | 10  | 3   | 3   | 11                      | 13                      | 32                       | 25                       | 1.28            | 0.247               | 0.697   |         |
|     | IPI00420108 | DLST          | Dihydrolipoyllysine-residue succinyltransferase component of 2-oxoglutarate dehydrogenase complex, mitochondrial precursor | Raft     | 9         | 105/453           | 16                    | 9   | 5   | 3   | 21                      | 12                      |                          |                          |                 |                     |         |         |
| 223 | IPI00012535 | DNAJA1        | DnaJ homolog subfamily A member 1                                                                                          | Non-raft | 2         | 26/397            | 1                     | 1   | 0   | 0   | 1                       | 1                       | 4                        | 3                        | 1.33            | 0.288               | 0.678   | M       |
|     | IPI00012535 | DNAJA1        | DnaJ homolog subfamily A member 1                                                                                          | Raft     | 3         | 41/397            | 3                     | 2   | 0   | 0   | 3                       | 2                       |                          |                          |                 |                     |         |         |
| 224 | IPI00032406 | DNAJA2        | DnaJ homolog subfamily A member 2                                                                                          | Raft     | 3         | 52/412            | 2                     | 1   | 0   | 0   | 2                       | 1                       | 2                        | 1                        | 2.00            | 0.693               | 0.473   |         |
| 225 | IPI00178504 | DNAJB14       | DnaJ                                                                                                                       | Raft     | 2         | 23/379            | 1                     | 0   | 0   | 1   | 1                       | 1                       | 1                        | 1                        | 1.00            | 0.000               | 0.799   |         |
| 226 | IPI00023780 | DNAJC5        | Isoform 2 of DnaJ homolog subfamily C member 5                                                                             | Non-raft | 4         | 60/167            | 4                     | 0   | 5   | 0   | 9                       | 0                       | 9                        | 0                        | 9.00            | 2.197               | 0.015   | M       |
| 227 | IPI00402231 | DNAJC5        | Isoform 1 of DnaJ homolog subfamily C member 5                                                                             | Non-raft | 4         | 74/198            | 6                     | 0   | 4   | 0   | 10                      | 0                       | 10                       | 0                        | 10.00           | 2.303               | 0.021   |         |
| 228 | IPI00329629 | DNAJC7        | DnaJ homolog subfamily C member 7                                                                                          | Non-raft | 2         | 23/494            | 1                     | 1   | 0   | 0   | 1                       | 1                       | 1                        | 1                        | 1.00            | 0.000               | 0.799   |         |
| 229 | IPI00031519 | DNMT1         | Isoform 1 of DNA                                                                                                           | Raft     | 3         | 30/1678           | 1                     | 2   | 0   | 0   | 1                       | 2                       | 1                        | 2                        | 0.50            | -0.693              | 0.959   |         |
| 230 | IPI00007425 | DSC1          | desmocollin 1 isoform Dsc1b preproprotein                                                                                  | Non-raft | 2         | 29/840            | 0                     | 2   | 0   | 0   | 0                       | 2                       | 0                        | 2                        | 0.50            | -0.693              | 0.959   |         |
| 231 | IPI00025753 | DSG1          | Desmoglein-1 precursor                                                                                                     | Non-raft | 6         | 116/1049          | 0                     | 9   | 0   | 2   | 0                       | 11                      | 5                        | 21                       | 0.24            | -1.435              | 0.997   |         |
|     | IPI00025753 | DSG1          | Desmoglein-1 precursor                                                                                                     | Raft     | 5         | 84/1049           | 5                     | 10  | 0   | 0   | 5                       | 10                      |                          |                          |                 |                     |         |         |
| 232 | IPI00028931 | DSG2          | desmoglein 2 preproprotein                                                                                                 | Non-raft | 25        | 396/1118          | 36                    | 2   | 30  | 1   | 66                      | 3                       | 218                      | 10                       | 21.80           | 3.082               | 0.001   | M       |
|     | IPI00028931 | DSG2          | desmoglein 2 preproprotein                                                                                                 | Raft     | 57        | 619/1118          | 84                    | 6   | 68  | 1   | 152                     | 7                       |                          |                          |                 |                     |         |         |
| 233 | IPI00013933 | DSP           | Isoform DPI of Desmoplakin                                                                                                 | Non-raft | 11        | 136/2871          | 4                     | 6   | 1   | 8   | 5                       | 14                      | 17                       | 18                       | 0.94            | -0.057              | 0.819   |         |
|     | IPI00013933 | DSP           | Isoform DPI of Desmoplakin                                                                                                 | Raft     | 12        | 180/2871          | 11                    | 4   | 1   | 0   | 12                      | 4                       |                          |                          |                 |                     |         |         |
| 234 | IPI00473014 | DSTN          | Destrin                                                                                                                    | Non-raft | 3         | 23/165            | 2                     | 3   | 1   | 1   | 3                       | 4                       | 3                        | 4                        | 0.75            | -0.288              | 0.888   |         |
| 235 | IPI00299076 | EBAG9         | Receptor-binding cancer antigen expressed on SiSo cells (Fragment)                                                         | Non-raft | 2         | 50/213            | 2                     | 0   | 0   | 0   | 2                       | 0                       | 2                        | 0                        | 2.00            | 0.693               | 0.473   | H       |
| 236 | IPI00216760 | ECE1          | Isoform C of Endothelin-converting enzyme 1                                                                                | Non-raft | 20        | 300/754           | 23                    | 0   | 16  | 0   | 39                      | 0                       | 39                       | 0                        | 39.00           | 3.664               | 0.000   |         |
| 237 | IPI00011416 | ECH1          | Delta3,5-delta2,4-dienoyl-CoA isomerase, mitochondrial precursor                                                           | Non-raft | 6         | 72/328            | 4                     | 1   | 2   | 2   | 6                       | 3                       | 6                        | 3                        | 2.00            | 0.693               | 0.473   |         |
| 238 | IPI00024993 | ECHS1         | Enoyl-CoA hydratase, mitochondrial precursor                                                                               | Non-raft | 2         | 35/290            | 1                     | 0   | 2   | 0   | 3                       | 0                       | 3                        | 0                        | 3.00            | 1.099               | 0.275   |         |
| 239 | IPI00376317 | EDC4          | autoantigen RCD8                                                                                                           | Raft     | 4         | 62/1401           | 5                     | 0   | 0   | 0   | 5                       | 0                       | 5                        | 0                        | 5.00            | 1.609               | 0.103   | M       |
| 240 | IPI00306046 | EDIL3         | Isoform 1 of EGF-like repeat and discoidin I-like domain-containing protein 3 precursor                                    | Non-raft | 10        | 134/480           | 11                    | 4   | 4   | 1   | 15                      | 5                       | 18                       | 7                        | 2.57            | 0.944               | 0.346   |         |

| No. | Acc.Number  | Gene Symbol | Description                                                                             | Fraction | Uni. Pep. | Sequence Coverage | Biological Replicates |     |     |     | Total EXP Each Fraction | Total CON Each Fraction | Total EXP Both Fractions | Total CON Both Fractions | EXP/CON Imputed | Ln(EXP/CON imputed) | P-value | 17-ODYA |
|-----|-------------|-------------|-----------------------------------------------------------------------------------------|----------|-----------|-------------------|-----------------------|-----|-----|-----|-------------------------|-------------------------|--------------------------|--------------------------|-----------------|---------------------|---------|---------|
|     |             |             |                                                                                         |          |           |                   | 1st                   |     | 2nd |     |                         |                         |                          |                          |                 |                     |         |         |
|     |             |             |                                                                                         |          |           |                   | EXP                   | CON | EXP | CON |                         |                         |                          |                          |                 |                     |         |         |
|     | IPI00306046 | EDIL3       | Isoform 1 of EGF-like repeat and discoidin 1-like domain-containing protein 3 precursor | Raft     | 3         | 40/480            | 2                     | 2   | 1   | 0   | 3                       | 2                       |                          |                          |                 |                     |         |         |
| 241 | IPI00396485 | EEF1A1      | Elongation factor 1-alpha 1                                                             | Non-raft | 18        | 275/462           | 21                    | 14  | 26  | 5   | 47                      | 19                      | 67                       | 30                       | 2.23            | 0.803               | 0.416   |         |
|     | IPI00396485 | EEF1A1      | Elongation factor 1-alpha 1                                                             | Raft     | 11        | 156/462           | 15                    | 6   | 5   | 5   | 20                      | 11                      |                          |                          |                 |                     |         |         |
| 242 | IPI00014424 | EEF1A2      | Elongation factor 1-alpha 2                                                             | Non-raft | 11        | 138/463           | 10                    | 4   | 14  | 5   | 24                      | 9                       | 35                       | 19                       | 1.84            | 0.611               | 0.516   |         |
|     | IPI00014424 | EEF1A2      | Elongation factor 1-alpha 2                                                             | Raft     | 8         | 124/463           | 5                     | 6   | 6   | 4   | 11                      | 10                      |                          |                          |                 |                     |         |         |
| 243 | IPI00023048 | EEF1D       | Elongation factor 1-delta                                                               | Non-raft | 2         | 28/281            | 1                     | 0   | 1   | 0   | 2                       | 0                       | 12                       | 4                        | 3.00            | 1.099               | 0.275   | M       |
|     | IPI00023048 | EEF1D       | Elongation factor 1-delta                                                               | Raft     | 6         | 64/281            | 6                     | 3   | 4   | 1   | 10                      | 4                       |                          |                          |                 |                     |         |         |
| 244 | IPI00000875 | EEF1G       | Elongation factor 1-gamma                                                               | Non-raft | 8         | 86/487            | 8                     | 7   | 5   | 7   | 13                      | 14                      | 36                       | 34                       | 1.06            | 0.057               | 0.777   | M       |
|     | IPI00000875 | EEF1G       | Elongation factor 1-gamma                                                               | Raft     | 17        | 211/487           | 14                    | 15  | 9   | 5   | 23                      | 20                      |                          |                          |                 |                     |         |         |
| 245 | IPI00186290 | EEF2        | Elongation factor 2                                                                     | Non-raft | 28        | 355/858           | 34                    | 22  | 19  | 12  | 53                      | 34                      | 56                       | 36                       | 1.56            | 0.442               | 0.603   | M       |
|     | IPI00186290 | EEF2        | Elongation factor 2                                                                     | Raft     | 5         | 64/858            | 3                     | 2   | 0   | 0   | 3                       | 2                       |                          |                          |                 |                     |         |         |
| 246 | IPI00304661 | EEPDI       | hypothetical protein LOC80820                                                           | Raft     | 6         | 82/157            | 2                     | 0   | 4   | 0   | 6                       | 0                       | 6                        | 0                        | 6.00            | 1.792               | 0.067   |         |
| 247 | IPI00470711 | EFR3A       | Hypothetical protein DKFZp781J0562                                                      | Non-raft | 10        | 128/821           | 7                     | 0   | 6   | 0   | 13                      | 0                       | 21                       | 0                        | 21.00           | 3.045               | 0.001   |         |
|     | IPI00470711 | EFR3A       | Hypothetical protein DKFZp781J0562                                                      | Raft     | 7         | 81/821            | 3                     | 0   | 5   | 0   | 8                       | 0                       |                          |                          |                 |                     |         |         |
| 248 | IPI00003519 | EFTUD2      | 116 kDa U5 small nuclear ribonucleoprotein component                                    | Raft     | 5         | 62/972            | 2                     | 3   | 0   | 0   | 2                       | 3                       | 2                        | 3                        | 0.67            | -0.405              | 0.914   |         |
| 249 | IPI00018274 | EGFR        | Isoform 1 of Epidermal growth factor receptor precursor                                 | Non-raft | 13        | 169/1210          | 5                     | 11  | 4   | 3   | 9                       | 14                      | 9                        | 14                       | 0.64            | -0.442              | 0.922   |         |
| 250 | IPI00012462 | EIF2A       | CDA02                                                                                   | Raft     | 6         | 99/609            | 5                     | 5   | 0   | 0   | 5                       | 5                       | 5                        | 5                        | 1.00            | 0.000               | 0.799   |         |
| 251 | IPI00220349 | EIF2C2      | eukaryotic translation initiation factor 2C, 2                                          | Raft     | 4         | 48/859            | 3                     | 1   | 0   | 0   | 3                       | 1                       | 3                        | 1                        | 3.00            | 1.099               | 0.275   |         |
| 252 | IPI00219678 | EIF2S1      | Eukaryotic translation initiation factor 2 subunit 1                                    | Non-raft | 4         | 48/315            | 2                     | 4   | 0   | 2   | 2                       | 6                       | 9                        | 12                       | 0.75            | -0.288              | 0.888   |         |
|     | IPI00219678 | EIF2S1      | Eukaryotic translation initiation factor 2 subunit 1                                    | Raft     | 8         | 116/315           | 6                     | 5   | 1   | 1   | 7                       | 6                       |                          |                          |                 |                     |         |         |
| 253 | IPI00297982 | EIF2S3      | Eukaryotic translation initiation factor 2 subunit 3                                    | Non-raft | 7         | 99/472            | 8                     | 3   | 1   | 3   | 9                       | 6                       | 29                       | 20                       | 1.45            | 0.372               | 0.638   |         |
|     | IPI00297982 | EIF2S3      | Eukaryotic translation initiation factor 2 subunit 3                                    | Raft     | 11        | 178/472           | 15                    | 10  | 5   | 4   | 20                      | 14                      |                          |                          |                 |                     |         |         |
| 254 | IPI00396370 | EIF3B       | Isoform 1 of Eukaryotic translation initiation factor 3 subunit 9                       | Non-raft | 3         | 37/814            | 2                     | 2   | 0   | 0   | 2                       | 2                       | 3                        | 3                        | 1.00            | 0.000               | 0.799   |         |
|     | IPI00396370 | EIF3B       | Isoform 1 of Eukaryotic translation initiation factor 3 subunit 9                       | Raft     | 2         | 23/814            | 1                     | 1   | 0   | 0   | 1                       | 1                       |                          |                          |                 |                     |         |         |
| 255 | IPI00016910 | EIF3C       | Eukaryotic translation initiation factor 3 subunit 8                                    | Non-raft | 4         | 45/913            | 3                     | 0   | 1   | 0   | 4                       | 0                       | 4                        | 0                        | 4.00            | 1.386               | 0.165   | M       |
| 256 | IPI00006181 | EIF3D       | Eukaryotic translation initiation factor 3 subunit 7                                    | Non-raft | 3         | 34/548            | 4                     | 3   | 0   | 0   | 4                       | 3                       | 8                        | 3                        | 2.67            | 0.981               | 0.329   |         |
|     | IPI00006181 | EIF3D       | Eukaryotic translation initiation factor 3 subunit 7                                    | Raft     | 4         | 52/548            | 2                     | 0   | 2   | 0   | 4                       | 0                       |                          |                          |                 |                     |         |         |
| 257 | IPI00465233 | EIF3EIP     | DJ1014D13.1 protein                                                                     | Non-raft | 3         | 37/607            | 3                     | 1   | 1   | 1   | 4                       | 2                       | 4                        | 2                        | 2.00            | 0.693               | 0.473   | M       |
| 258 | IPI00654777 | EIF3F       | Eukaryotic translation initiation factor 3 subunit 5                                    | Raft     | 2         | 30/372            | 0                     | 0   | 2   | 0   | 2                       | 0                       | 2                        | 0                        | 2.00            | 0.693               | 0.473   |         |
| 259 | IPI00290460 | EIF3G       | Eukaryotic translation initiation factor 3 subunit 4                                    | Raft     | 2         | 25/320            | 1                     | 0   | 1   | 0   | 2                       | 0                       | 2                        | 0                        | 2.00            | 0.693               | 0.473   |         |
| 260 | IPI00647650 | EIF3H       | Eukaryotic translation initiation factor 3 subunit 3                                    | Raft     | 3         | 50/366            | 3                     | 1   | 2   | 0   | 5                       | 1                       | 5                        | 1                        | 5.00            | 1.609               | 0.103   |         |
| 261 | IPI00012795 | EIF3I       | Eukaryotic translation initiation factor 3 subunit 2                                    | Non-raft | 9         | 124/325           | 6                     | 3   | 1   | 0   | 7                       | 3                       | 10                       | 4                        | 2.50            | 0.916               | 0.360   |         |
|     | IPI00012795 | EIF3I       | Eukaryotic translation initiation factor 3 subunit 2                                    | Raft     | 3         | 33/325            | 3                     | 1   | 0   | 0   | 3                       | 1                       |                          |                          |                 |                     |         |         |
| 262 | IPI00033143 | EIF3K       | Eukaryotic translation initiation factor 3 subunit 12                                   | Non-raft | 2         | 28/218            | 1                     | 0   | 1   | 0   | 2                       | 0                       | 8                        | 1                        | 8.00            | 2.079               | 0.030   |         |
|     | IPI00033143 | EIF3K       | Eukaryotic translation initiation factor 3 subunit 12                                   | Raft     | 4         | 43/218            | 5                     | 1   | 1   | 0   | 6                       | 1                       |                          |                          |                 |                     |         |         |
| 263 | IPI00025491 | EIF4A1      | Eukaryotic initiation factor 4A-1                                                       | Non-raft | 7         | 104/406           | 11                    | 4   | 4   | 1   | 15                      | 5                       | 20                       | 8                        | 2.50            | 0.916               | 0.360   |         |
|     | IPI00025491 | EIF4A1      | Eukaryotic initiation factor 4A-1                                                       | Raft     | 4         | 47/406            | 3                     | 3   | 2   | 0   | 5                       | 3                       |                          |                          |                 |                     |         |         |
| 264 | IPI00009328 | EIF4A3      | Probable ATP-dependent RNA helicase DDX48                                               | Raft     | 4         | 51/411            | 3                     | 1   | 0   | 0   | 3                       | 1                       | 3                        | 1                        | 3.00            | 1.099               | 0.275   | M       |
| 265 | IPI00220365 | EIF4G1      | EIF4G1 variant protein (Fragment)                                                       | Non-raft | 3         | 33/798            | 2                     | 1   | 0   | 0   | 2                       | 1                       | 2                        | 1                        | 2.00            | 0.693               | 0.473   |         |
| 266 | IPI00022648 | EIF5        | Eukaryotic translation initiation factor 5                                              | Non-raft | 4         | 35/431            | 3                     | 0   | 2   | 0   | 5                       | 0                       | 5                        | 0                        | 5.00            | 1.609               | 0.103   |         |
| 267 | IPI00006935 | EIF5A2      | Eukaryotic translation initiation factor 5A-2                                           | Raft     | 2         | 19/153            | 2                     | 0   | 1   | 0   | 3                       | 0                       | 3                        | 0                        | 3.00            | 1.099               | 0.275   |         |
| 268 | IPI00010105 | EIF6        | Eukaryotic translation initiation factor 6                                              | Non-raft | 2         | 32/245            | 2                     | 0   | 0   | 0   | 2                       | 0                       | 5                        | 1                        | 5.00            | 1.609               | 0.103   |         |
|     | IPI00010105 | EIF6        | Eukaryotic translation initiation factor 6                                              | Raft     | 3         | 67/245            | 3                     | 1   | 0   | 0   | 3                       | 1                       |                          |                          |                 |                     |         |         |
| 269 | IPI00301936 | ELAVL1      | ELAV-like protein 1                                                                     | Non-raft | 3         | 33/353            | 3                     | 2   | 0   | 1   | 3                       | 3                       | 11                       | 8                        | 1.38            | 0.318               | 0.664   |         |
|     | IPI00301936 | ELAVL1      | ELAV-like protein 1                                                                     | Raft     | 8         | 94/353            | 6                     | 5   | 2   | 0   | 8                       | 5                       |                          |                          |                 |                     |         |         |
| 270 | IPI00010187 | ELOVL1      | Elongation of very long chain fatty acids protein 1                                     | Non-raft | 2         | 25/279            | 7                     | 1   | 3   | 0   | 10                      | 1                       | 10                       | 1                        | 10.00           | 2.303               | 0.015   |         |
| 271 | IPI00465248 | ENO1        | enolase 1                                                                               | Non-raft | 17        | 249/434           | 15                    | 15  | 7   | 5   | 22                      | 20                      | 23                       | 21                       | 1.10            | 0.091               | 0.764   |         |



| No. | Acc.Number  | Gene Symbol | Description                                                                 | Fraction | Uni. Pep. | Sequence Coverage | Biological Replicates |     |     |     | Total EXP Each Fraction | Total CON Each Fraction | Total EXP Both Fractions | Total CON Both Fractions | EXP/CON Imputed | Ln(EXP/CON imputed) | P-value | 17-ODYA |
|-----|-------------|-------------|-----------------------------------------------------------------------------|----------|-----------|-------------------|-----------------------|-----|-----|-----|-------------------------|-------------------------|--------------------------|--------------------------|-----------------|---------------------|---------|---------|
|     |             |             |                                                                             |          |           |                   | 1st                   |     | 2nd |     |                         |                         |                          |                          |                 |                     |         |         |
|     |             |             |                                                                             |          |           |                   | EXP                   | CON | EXP | CON |                         |                         |                          |                          |                 |                     |         |         |
|     | IPI00465248 | ENO1        | enolase 1                                                                   | Raft     | 2         | 23/434            | 1                     | 1   | 0   | 0   | 1                       | 1                       |                          |                          |                 |                     |         |         |
| 272 | IPI00218474 | ENO3        | Beta-enolase                                                                | Non-raft | 4         | 81/434            | 6                     | 3   | 1   | 0   | 7                       | 3                       | 7                        | 3                        | 2.33            | 0.847               | 0.394   |         |
| 273 | IPI00015973 | EPB41L2     | Band 4.1-like protein 2                                                     | Non-raft | 2         | 27/1005           | 1                     | 1   | 0   | 0   | 1                       | 1                       | 1                        | 1                        | 1.00            | 0.000               | 0.799   |         |
| 274 | IPI00021267 | EPHA2       | Ephrin type-A receptor 2 precursor                                          | Non-raft | 13        | 141/976           | 9                     | 8   | 2   | 3   | 11                      | 11                      | 13                       | 12                       | 1.08            | 0.080               | 0.768   |         |
|     | IPI00021267 | EPHA2       | Ephrin type-A receptor 2 precursor                                          | Raft     | 2         | 18/976            | 2                     | 1   | 0   | 0   | 2                       | 1                       |                          |                          |                 |                     |         |         |
| 275 | IPI00186826 | EPHB4       | Receptor protein tyrosine kinase variant EphB4v1                            | Non-raft | 3         | 30/935            | 2                     | 3   | 0   | 0   | 2                       | 3                       | 2                        | 3                        | 0.67            | -0.405              | 0.914   |         |
| 276 | IPI00013452 | EPRS        | glutamyl-prolyl tRNA synthetase                                             | Non-raft | 8         | 106/1512          | 6                     | 3   | 0   | 0   | 6                       | 3                       | 7                        | 4                        | 1.75            | 0.560               | 0.543   |         |
|     | IPI00013452 | EPRS        | glutamyl-prolyl tRNA synthetase                                             | Raft     | 2         | 22/1512           | 1                     | 1   | 0   | 0   | 1                       | 1                       |                          |                          |                 |                     |         |         |
| 277 | IPI00438286 | ERBB2IP     | Isoform 1 of Protein LAP2                                                   | Non-raft | 31        | 467/1412          | 42                    | 0   | 31  | 0   | 73                      | 0                       | 93                       | 0                        | 93.00           | 4.533               | 0.000   |         |
|     | IPI00438286 | ERBB2IP     | Isoform 1 of Protein LAP2                                                   | Raft     | 12        | 165/1412          | 14                    | 0   | 6   | 0   | 20                      | 0                       |                          |                          |                 |                     |         |         |
| 278 | IPI00006438 | ERGIC3      | Isoform 1 of Endoplasmic reticulum-Golgi intermediate compartment protein 3 | Non-raft | 3         | 28/383            | 3                     | 0   | 0   | 0   | 3                       | 0                       | 3                        | 0                        | 3.00            | 1.099               | 0.275   |         |
| 279 | IPI00026942 | ERLIN2      | Isoform 1 of SPFH domain-containing protein 2 precursor                     | Non-raft | 2         | 23/339            | 1                     | 1   | 0   | 0   | 1                       | 1                       | 1                        | 1                        | 1.00            | 0.000               | 0.799   |         |
| 280 | IPI00386755 | ERO1L       | ERO1-like protein alpha precursor                                           | Non-raft | 8         | 114/468           | 2                     | 6   | 2   | 2   | 4                       | 8                       | 4                        | 8                        | 0.50            | -0.693              | 0.959   |         |
| 281 | IPI00024911 | ERP29       | Endoplasmic reticulum protein ERP29 precursor                               | Non-raft | 3         | 32/261            | 3                     | 0   | 0   | 0   | 3                       | 0                       | 3                        | 0                        | 3.00            | 1.099               | 0.275   |         |
| 282 | IPI00429191 | ETF1        | Eukaryotic peptide chain release factor subunit 1                           | Non-raft | 2         | 23/437            | 2                     | 0   | 1   | 0   | 3                       | 0                       | 3                        | 0                        | 3.00            | 1.099               | 0.275   |         |
| 283 | IPI00010810 | ETFA        | Electron transfer flavoprotein subunit alpha, mitochondrial precursor       | Non-raft | 3         | 47/333            | 2                     | 1   | 0   | 0   | 2                       | 1                       | 2                        | 1                        | 2.00            | 0.693               | 0.473   |         |
| 284 | IPI00015905 | EXOSC2      | Exosome complex exonuclease RRP4                                            | Raft     | 2         | 22/293            | 2                     | 0   | 2   | 0   | 4                       | 0                       | 4                        | 0                        | 4.00            | 1.386               | 0.165   |         |
| 285 | IPI00218310 | EXOSC4      | Exosome complex exonuclease RRP41                                           | Raft     | 2         | 22/245            | 1                     | 1   | 0   | 0   | 1                       | 1                       | 1                        | 1                        | 1.00            | 0.000               | 0.799   |         |
| 286 | IPI00073602 | EXOSC6      | homolog of yeast mRNA transport regulator 3                                 | Raft     | 2         | 27/272            | 1                     | 0   | 1   | 0   | 2                       | 0                       | 2                        | 0                        | 2.00            | 0.693               | 0.473   |         |
| 287 | IPI00479359 | EZR         | villin 2                                                                    | Non-raft | 2         | 29/585            | 0                     | 1   | 2   | 0   | 2                       | 1                       | 2                        | 1                        | 2.00            | 0.693               | 0.473   |         |
| 288 | IPI00001754 | F11R        | Junctional adhesion molecule A precursor                                    | Non-raft | 4         | 58/299            | 3                     | 4   | 0   | 0   | 3                       | 4                       | 3                        | 4                        | 0.75            | -0.288              | 0.888   |         |
| 289 | IPI00010338 | F3          | Tissue factor precursor                                                     | Non-raft | 6         | 75/295            | 5                     | 0   | 3   | 0   | 8                       | 0                       | 8                        | 0                        | 8.00            | 2.079               | 0.030   |         |
| 290 | IPI00412592 | FAM108B1    | chromosome 9 open reading frame 77 isoform 2                                | Non-raft | 8         | 144/288           | 8                     | 0   | 3   | 0   | 11                      | 0                       | 14                       | 0                        | 14.00           | 2.639               | 0.005   |         |
|     | IPI00412592 | FAM108B1    | chromosome 9 open reading frame 77 isoform 2                                | Raft     | 2         | 26/288            | 2                     | 0   | 1   | 0   | 3                       | 0                       |                          |                          |                 |                     |         |         |
| 291 | IPI00747290 | FAM108C1    | Isoform 2 of abhydrolase domain-containing protein FAM108C1                 | Non-raft | 2         | 22/295            | 2                     | 0   | 0   | 0   | 2                       | 0                       | 2                        | 0                        | 2.00            | 0.693               | 0.473   |         |
| 292 | IPI00039626 | FAM120A     | Isoform D of UPF0318 protein FAM120A                                        | Raft     | 4         | 60/1072           | 4                     | 1   | 0   | 0   | 4                       | 1                       | 4                        | 1                        | 4.00            | 1.386               | 0.165   |         |
| 293 | IPI00456750 | FAM129B     | Niban-like protein                                                          | Non-raft | 2         | 24/733            | 2                     | 1   | 0   | 0   | 2                       | 1                       | 2                        | 1                        | 2.00            | 0.693               | 0.473   |         |
| 294 | IPI00021923 | FAM3C       | Protein FAM3C precursor                                                     | Non-raft | 2         | 22/227            | 2                     | 0   | 0   | 0   | 2                       | 0                       | 2                        | 0                        | 2.00            | 0.693               | 0.473   |         |
| 295 | IPI00303318 | FAM49B      | Protein FAM49B                                                              | Non-raft | 20        | 241/324           | 31                    | 0   | 19  | 0   | 50                      | 0                       | 52                       | 0                        | 52.00           | 3.951               | 0.000   |         |
|     | IPI00303318 | FAM49B      | Protein FAM49B                                                              | Raft     | 2         | 37/324            | 2                     | 0   | 0   | 0   | 2                       | 0                       |                          |                          |                 |                     |         |         |
| 296 | IPI00022143 | FAM62A      | Isoform 1 of Protein FAM62A                                                 | Non-raft | 11        | 163/1104          | 6                     | 5   | 4   | 4   | 10                      | 9                       | 10                       | 9                        | 1.11            | 0.105               | 0.758   |         |
| 297 | IPI00300074 | FARSB       | Phenylalanyl-tRNA synthetase beta chain                                     | Non-raft | 8         | 92/589            | 3                     | 4   | 4   | 3   | 7                       | 7                       | 18                       | 16                       | 1.13            | 0.118               | 0.753   |         |
|     | IPI00300074 | FARSB       | Phenylalanyl-tRNA synthetase beta chain                                     | Raft     | 10        | 110/589           | 8                     | 4   | 3   | 5   | 11                      | 9                       |                          |                          |                 |                     |         |         |
| 298 | IPI00026781 | FASN        | Fatty acid synthase                                                         | Non-raft | 41        | 545/2511          | 31                    | 8   | 20  | 3   | 51                      | 11                      | 54                       | 11                       | 4.91            | 1.591               | 0.108   |         |
|     | IPI00026781 | FASN        | Fatty acid synthase                                                         | Raft     | 3         | 32/2511           | 3                     | 0   | 0   | 0   | 3                       | 0                       |                          |                          |                 |                     |         |         |
| 299 | IPI00174757 | FBXL20      | F-box/LRR-repeat protein 20                                                 | Non-raft | 5         | 53/436            | 4                     | 0   | 1   | 0   | 5                       | 0                       | 5                        | 0                        | 5.00            | 1.609               | 0.103   |         |
| 300 | IPI00021048 | FER1L3      | Isoform 1 of Myoferlin                                                      | Non-raft | 91        | 956/2061          | 94                    | 32  | 66  | 13  | 160                     | 45                      | 191                      | 48                       | 3.98            | 1.381               | 0.167   |         |
|     | IPI00021048 | FER1L3      | Isoform 1 of Myoferlin                                                      | Raft     | 21        | 275/2061          | 22                    | 3   | 9   | 0   | 31                      | 3                       |                          |                          |                 |                     |         |         |
| 301 | IPI00000856 | FERMT2      | Isoform 1 of Pleckstrin homology domain-containing family C member 1        | Non-raft | 3         | 42/680            | 3                     | 1   | 0   | 0   | 3                       | 1                       | 3                        | 1                        | 3.00            | 1.099               | 0.275   |         |
| 302 | IPI00328161 | FKBP8       | FK506-binding protein 8                                                     | Non-raft | 5         | 87/413            | 1                     | 2   | 2   | 3   | 3                       | 5                       | 3                        | 5                        | 0.60            | -0.511              | 0.934   |         |
| 303 | IPI00013281 | FKRP        | Fukutin-related protein                                                     | Non-raft | 2         | 25/495            | 0                     | 0   | 2   | 0   | 2                       | 0                       | 2                        | 0                        | 2.00            | 0.693               | 0.473   |         |
| 304 | IPI00397801 | FLG2        | Ifapsoriasis                                                                | Non-raft | 2         | 23/2391           | 1                     | 2   | 0   | 0   | 1                       | 2                       | 4                        | 4                        | 1.00            | 0.000               | 0.799   |         |
|     | IPI00397801 | FLG2        | Ifapsoriasis                                                                | Raft     | 2         | 23/2391           | 3                     | 2   | 0   | 0   | 3                       | 2                       |                          |                          |                 |                     |         |         |
| 305 | IPI00301987 | FLJ20323    | hypothetical protein FLJ20323                                               | Raft     | 5         | 73/875            | 5                     | 1   | 0   | 0   | 5                       | 1                       | 5                        | 1                        | 5.00            | 1.609               | 0.103   |         |
| 306 | IPI00302592 | FLNA        | filamin 1                                                                   | Non-raft | 79        | 1117/2639         | 53                    | 63  | 21  | 26  | 74                      | 89                      | 99                       | 111                      | 0.89            | -0.114              | 0.838   |         |

| No. | Acc.Number  | Gene Symbol | Description                                                                                                    | Fraction | Uni. Pep. | Sequence Coverage | Biological Replicates |     |     |     | Total EXP Each Fraction | Total CON Each Fraction | Total EXP Both Fractions | Total CON Both Fractions | EXP/CON Imputed | Ln(EXP/CON imputed) | P-value | 17-ODYA |
|-----|-------------|-------------|----------------------------------------------------------------------------------------------------------------|----------|-----------|-------------------|-----------------------|-----|-----|-----|-------------------------|-------------------------|--------------------------|--------------------------|-----------------|---------------------|---------|---------|
|     |             |             |                                                                                                                |          |           |                   | 1st                   |     | 2nd |     |                         |                         |                          |                          |                 |                     |         |         |
|     |             |             |                                                                                                                |          |           |                   | EXP                   | CON | EXP | CON |                         |                         |                          |                          |                 |                     |         |         |
|     | IPI00302592 | FLNA        | filamin 1                                                                                                      | Raft     | 29        | 452/2639          | 25                    | 21  | 0   | 1   | 25                      | 22                      |                          |                          |                 |                     |         |         |
| 307 | IPI00477536 | FLNB        | Filamin B                                                                                                      | Non-raft | 83        | 1102/2591         | 54                    | 68  | 23  | 22  | 77                      | 90                      | 93                       | 104                      | 0.89            | -0.112              | 0.837   | M       |
|     | IPI00477536 | FLNB        | Filamin B                                                                                                      | Raft     | 23        | 312/2591          | 16                    | 14  | 0   | 0   | 16                      | 14                      |                          |                          |                 |                     |         |         |
| 308 | IPI00178352 | FLNC        | Isoform 1 of Filamin-C                                                                                         | Non-raft | 23        | 276/2725          | 11                    | 13  | 3   | 1   | 14                      | 14                      | 18                       | 15                       | 1.20            | 0.182               | 0.726   |         |
|     | IPI00178352 | FLNC        | Isoform 1 of Filamin-C                                                                                         | Raft     | 4         | 52/2725           | 4                     | 1   | 0   | 0   | 4                       | 1                       |                          |                          |                 |                     |         |         |
| 309 | IPI00027438 | FLOT1       | Flotillin-1                                                                                                    | Non-raft | 25        | 303/427           | 27                    | 1   | 24  | 0   | 51                      | 1                       | 152                      | 7                        | 21.71           | 3.078               | 0.001   | H       |
|     | IPI00027438 | FLOT1       | Flotillin-1                                                                                                    | Raft     | 33        | 351/427           | 52                    | 4   | 49  | 2   | 101                     | 6                       |                          |                          |                 |                     |         |         |
| 310 | IPI00029625 | FLOT2       | Flotillin-2                                                                                                    | Non-raft | 24        | 260/428           | 34                    | 1   | 30  | 0   | 64                      | 1                       | 176                      | 6                        | 29.33           | 3.379               | 0.000   | H       |
|     | IPI00029625 | FLOT2       | Flotillin-2                                                                                                    | Raft     | 33        | 404/428           | 60                    | 5   | 52  | 0   | 112                     | 5                       |                          |                          |                 |                     |         |         |
| 311 | IPI00217490 | FNDC3B      | Factor for adipocyte differentiation 104 variant                                                               | Non-raft | 2         | 23/1204           | 0                     | 2   | 0   | 1   | 0                       | 3                       | 3                        | 6                        | 0.50            | -0.693              | 0.959   |         |
|     | IPI00217490 | FNDC3B      | Factor for adipocyte differentiation 104 variant                                                               | Raft     | 5         | 73/1204           | 3                     | 3   | 0   | 0   | 3                       | 3                       |                          |                          |                 |                     |         |         |
| 312 | IPI00163187 | FSCN1       | Fascin                                                                                                         | Non-raft | 8         | 116/493           | 8                     | 3   | 2   | 1   | 10                      | 4                       | 10                       | 4                        | 2.50            | 0.916               | 0.360   |         |
| 313 | IPI00016249 | FXR1        | Isoform 1 of Fragile X mental retardation syndrome-related protein 1                                           | Raft     | 6         | 76/621            | 5                     | 4   | 0   | 1   | 5                       | 5                       | 5                        | 5                        | 1.00            | 0.000               | 0.799   |         |
| 314 | IPI00016250 | FXR2        | Fragile X mental retardation syndrome-related protein 2                                                        | Raft     | 3         | 43/698            | 4                     | 1   | 0   | 0   | 4                       | 1                       | 4                        | 1                        | 4.00            | 1.386               | 0.165   |         |
| 315 | IPI00020228 | FZD6        | Frizzled-6 precursor                                                                                           | Non-raft | 3         | 28/706            | 3                     | 0   | 3   | 0   | 6                       | 0                       | 6                        | 0                        | 6.00            | 1.792               | 0.067   |         |
| 316 | IPI00012442 | G3BP1       | Ras-GTPase-activating protein-binding protein 1                                                                | Raft     | 7         | 102/466           | 4                     | 5   | 0   | 0   | 4                       | 5                       | 4                        | 5                        | 0.80            | -0.223              | 0.871   |         |
| 317 | IPI00216008 | G6PD        | Isoform Long of Glucose-6-phosphate 1-dehydrogenase                                                            | Non-raft | 4         | 43/561            | 2                     | 3   | 1   | 1   | 3                       | 4                       | 3                        | 4                        | 0.75            | -0.288              | 0.888   |         |
| 318 | IPI00004669 | GALNT2      | Polypeptide N-acetylgalactosaminyltransferase 2                                                                | Non-raft | 5         | 62/571            | 4                     | 1   | 0   | 1   | 4                       | 2                       | 4                        | 2                        | 2.00            | 0.693               | 0.473   |         |
| 319 | IPI00011454 | GANAB       | Isoform 2 of Neutral alpha-glucosidase AB precursor                                                            | Non-raft | 14        | 216/966           | 12                    | 7   | 3   | 1   | 15                      | 8                       | 15                       | 8                        | 1.88            | 0.629               | 0.507   |         |
| 320 | IPI00219018 | GAPDH       | Glyceraldehyde-3-phosphate dehydrogenase                                                                       | Non-raft | 29        | 361/335           | 143                   | 62  | 101 | 43  | 244                     | 105                     | 271                      | 113                      | 2.40            | 0.875               | 0.380   |         |
|     | IPI00219018 | GAPDH       | Glyceraldehyde-3-phosphate dehydrogenase                                                                       | Raft     | 12        | 160/335           | 15                    | 5   | 12  | 3   | 27                      | 8                       |                          |                          |                 |                     |         |         |
| 321 | IPI00465260 | GARS        | GARS protein                                                                                                   | Non-raft | 9         | 158/739           | 5                     | 4   | 3   | 2   | 8                       | 6                       | 8                        | 6                        | 1.33            | 0.288               | 0.678   |         |
| 322 | IPI00025273 | GART        | Isoform Long of Trifunctional purine biosynthetic protein adenosine-3                                          | Non-raft | 2         | 27/1010           | 2                     | 0   | 0   | 0   | 2                       | 0                       | 2                        | 0                        | 2.00            | 0.693               | 0.473   |         |
| 323 | IPI00021807 | GBA         | Isoform Long of Glucosylceramidase precursor                                                                   | Non-raft | 4         | 58/536            | 2                     | 1   | 2   | 1   | 4                       | 2                       | 4                        | 2                        | 2.00            | 0.693               | 0.473   |         |
| 324 | IPI00001159 | GCN1L1      | GCN1-like protein 1                                                                                            | Non-raft | 8         | 94/2671           | 4                     | 6   | 2   | 1   | 6                       | 7                       | 6                        | 7                        | 0.86            | -0.154              | 0.851   |         |
| 325 | IPI00031461 | GDI2        | Rab GDP dissociation inhibitor beta                                                                            | Non-raft | 3         | 42/449            | 1                     | 3   | 0   | 0   | 1                       | 3                       | 1                        | 3                        | 0.33            | -1.099              | 0.988   |         |
| 326 | IPI00154473 | GFM1        | 84 kDa protein                                                                                                 | Non-raft | 4         | 39/751            | 2                     | 2   | 1   | 0   | 3                       | 2                       | 3                        | 2                        | 1.50            | 0.405               | 0.621   |         |
| 327 | IPI00217952 | GFPT1       | Isoform 1 of Glucosamine--fructose-6-phosphate aminotransferase [isomerizing] 1                                | Non-raft | 10        | 140/699           | 7                     | 0   | 6   | 0   | 13                      | 0                       | 13                       | 0                        | 13.00           | 2.565               | 0.006   |         |
| 328 | IPI00414717 | GLG1        | golgi apparatus protein 1                                                                                      | Non-raft | 9         | 97/1203           | 5                     | 2   | 3   | 4   | 8                       | 6                       | 8                        | 6                        | 1.33            | 0.288               | 0.678   | M       |
| 329 | IPI00215687 | GLS         | Isoform GAC of Glutaminase kidney isoform, mitochondrial precursor                                             | Non-raft | 12        | 194/598           | 12                    | 9   | 15  | 11  | 27                      | 20                      | 27                       | 20                       | 1.35            | 0.300               | 0.672   |         |
| 330 | IPI00289159 | GLS         | Isoform KGA of Glutaminase kidney isoform, mitochondrial precursor                                             | Non-raft | 13        | 171/669           | 11                    | 9   | 14  | 10  | 25                      | 19                      | 25                       | 19                       | 1.32            | 0.274               | 0.684   |         |
| 331 | IPI00168262 | GLT25D1     | CDNA PSEC0241 fis, clone NT2RP3000234, moderately similar to Homo sapiens cerebral cell adhesion molecule mRNA | Non-raft | 2         | 18/622            | 1                     | 1   | 1   | 0   | 2                       | 1                       | 3                        | 3                        | 1.00            | 0.000               | 0.799   |         |
|     | IPI00168262 | GLT25D1     | CDNA PSEC0241 fis, clone NT2RP3000234, moderately similar to Homo sapiens cerebral cell adhesion molecule mRNA | Raft     | 2         | 18/622            | 1                     | 2   | 0   | 0   | 1                       | 2                       |                          |                          |                 |                     |         |         |
| 332 | IPI00016801 | GLUD1       | Glutamate dehydrogenase 1, mitochondrial precursor                                                             | Raft     | 9         | 110/558           | 9                     | 11  | 7   | 5   | 16                      | 16                      | 16                       | 16                       | 1.00            | 0.000               | 0.799   |         |
| 333 | IPI00305551 | GNA11       | Guanine nucleotide-binding protein subunit alpha-11                                                            | Non-raft | 24        | 278/359           | 36                    | 1   | 20  | 1   | 56                      | 2                       | 77                       | 2                        | 38.50           | 3.651               | 0.000   | H       |
|     | IPI00305551 | GNA11       | Guanine nucleotide-binding protein subunit alpha-11                                                            | Raft     | 13        | 155/359           | 11                    | 0   | 10  | 0   | 21                      | 0                       |                          |                          |                 |                     |         |         |
| 334 | IPI00328744 | GNA12       | Guanine nucleotide-binding protein alpha-12 subunit                                                            | Non-raft | 6         | 71/381            | 9                     | 0   | 8   | 0   | 17                      | 0                       | 17                       | 0                        | 17.00           | 2.833               | 0.002   |         |
| 335 | IPI00290928 | GNA13       | Guanine nucleotide-binding protein alpha-13 subunit                                                            | Non-raft | 17        | 194/377           | 26                    | 1   | 19  | 1   | 45                      | 2                       | 53                       | 2                        | 26.50           | 3.277               | 0.000   | H       |
|     | IPI00290928 | GNA13       | Guanine nucleotide-binding protein alpha-13 subunit                                                            | Raft     | 7         | 102/377           | 5                     | 0   | 3   | 0   | 8                       | 0                       |                          |                          |                 |                     |         |         |
| 336 | IPI00337415 | GNAI1       | Guanine nucleotide-binding protein G(i), alpha-1 subunit                                                       | Non-raft | 14        | 161/354           | 13                    | 0   | 11  | 2   | 24                      | 2                       | 46                       | 2                        | 23.00           | 3.135               | 0.001   |         |
|     | IPI00337415 | GNAI1       | Guanine nucleotide-binding protein G(i), alpha-1 subunit                                                       | Raft     | 12        | 134/354           | 10                    | 0   | 12  | 0   | 22                      | 0                       |                          |                          |                 |                     |         |         |

| No. | Acc.Number  | Gene Symbol | Description                                                                             | Fraction | Uni. Pep. | Sequence Coverage | Biological Replicates |     |     |     | Total EXP Each Fraction | Total CON Each Fraction | Total EXP Both Fractions | Total CON Both Fractions | EXP/CON Imputed | Ln(EXP/CON imputed) | P-value | 17-ODYA |
|-----|-------------|-------------|-----------------------------------------------------------------------------------------|----------|-----------|-------------------|-----------------------|-----|-----|-----|-------------------------|-------------------------|--------------------------|--------------------------|-----------------|---------------------|---------|---------|
|     |             |             |                                                                                         |          |           |                   | 1st                   |     | 2nd |     |                         |                         |                          |                          |                 |                     |         |         |
|     |             |             |                                                                                         |          |           |                   | EXP                   | CON | EXP | CON |                         |                         |                          |                          |                 |                     |         |         |
| 337 | IPI00748145 | GNAI2       | guanine nucleotide binding protein (G protein), alpha inhibiting activity polypeptide 2 | Non-raft | 23        | 248/355           | 40                    | 5   | 22  | 5   | 62                      | 10                      | 108                      | 12                       | 9.00            | 2.197               | 0.021   | H       |
|     | IPI00748145 | GNAI2       | guanine nucleotide binding protein (G protein), alpha inhibiting activity polypeptide 2 | Raft     | 20        | 230/355           | 18                    | 1   | 28  | 1   | 46                      | 2                       |                          |                          |                 |                     |         |         |
| 338 | IPI00220578 | GNAI3       | Guanine nucleotide-binding protein G(k) subunit alpha                                   | Non-raft | 19        | 234/354           | 32                    | 4   | 25  | 6   | 57                      | 10                      | 92                       | 11                       | 8.36            | 2.124               | 0.026   | H       |
|     | IPI00220578 | GNAI3       | Guanine nucleotide-binding protein G(k) subunit alpha                                   | Raft     | 16        | 206/354           | 14                    | 0   | 21  | 1   | 35                      | 1                       |                          |                          |                 |                     |         |         |
| 339 | IPI00220281 | GNAO1       | Guanine nucleotide-binding protein G(o) subunit alpha 1                                 | Non-raft | 5         | 52/354            | 6                     | 0   | 0   | 0   | 6                       | 0                       | 6                        | 0                        | 6.00            | 1.792               | 0.067   | H       |
| 340 | IPI00288947 | GNAQ        | Guanine nucleotide binding protein                                                      | Non-raft | 19        | 262/359           | 22                    | 0   | 21  | 1   | 43                      | 1                       | 68                       | 1                        | 68.00           | 4.220               | 0.000   | H       |
|     | IPI00288947 | GNAQ        | Guanine nucleotide binding protein                                                      | Raft     | 13        | 212/359           | 13                    | 0   | 12  | 0   | 25                      | 0                       |                          |                          |                 |                     |         |         |
| 341 | IPI00219835 | GNAS        | Isoform Gnas-2 of Guanine nucleotide-binding protein G(s) subunit alpha isoforms short  | Non-raft | 19        | 236/380           | 34                    | 6   | 17  | 1   | 51                      | 7                       | 89                       | 7                        | 12.71           | 2.543               | 0.007   | H       |
|     | IPI00219835 | GNAS        | Isoform Gnas-2 of Guanine nucleotide-binding protein G(s) subunit alpha isoforms short  | Raft     | 22        | 256/380           | 18                    | 0   | 20  | 0   | 38                      | 0                       |                          |                          |                 |                     |         |         |
| 342 | IPI00514055 | GNAS        | Isoform Gnas-1 of Guanine nucleotide-binding protein G(s) subunit alpha isoforms short  | Non-raft | 18        | 229/394           | 30                    | 6   | 19  | 1   | 49                      | 7                       | 89                       | 7                        | 12.71           | 2.543               | 0.007   | H       |
|     | IPI00514055 | GNAS        | Isoform Gnas-1 of Guanine nucleotide-binding protein G(s) subunit alpha isoforms short  | Raft     | 22        | 261/394           | 18                    | 0   | 22  | 0   | 40                      | 0                       |                          |                          |                 |                     |         |         |
| 343 | IPI00644936 | GNAS        | Guanine nucleotide-binding protein G-s-alpha-3                                          | Raft     | 22        | 258/379           | 17                    | 0   | 20  | 0   | 37                      | 0                       | 37                       | 0                        | 37.00           | 3.611               | 0.000   | H       |
| 344 | IPI00026268 | GNB1        | Guanine nucleotide-binding protein G(I)/G(S)/G(T) subunit beta 1                        | Non-raft | 9         | 145/340           | 11                    | 9   | 1   | 3   | 12                      | 12                      | 17                       | 15                       | 1.13            | 0.125               | 0.750   |         |
|     | IPI00026268 | GNB1        | Guanine nucleotide-binding protein G(I)/G(S)/G(T) subunit beta 1                        | Raft     | 6         | 74/340            | 4                     | 2   | 1   | 1   | 5                       | 3                       |                          |                          |                 |                     |         |         |
| 345 | IPI00003348 | GNB2        | Guanine nucleotide-binding protein G(I)/G(S)/G(T) subunit beta 2                        | Non-raft | 8         | 95/340            | 5                     | 6   | 2   | 4   | 7                       | 10                      | 13                       | 11                       | 1.18            | 0.167               | 0.732   |         |
|     | IPI00003348 | GNB2        | Guanine nucleotide-binding protein G(I)/G(S)/G(T) subunit beta 2                        | Raft     | 6         | 74/340            | 4                     | 1   | 2   | 0   | 6                       | 1                       |                          |                          |                 |                     |         |         |
| 346 | IPI00641950 | GNB2L1      | Lung cancer oncogene 7                                                                  | Non-raft | 9         | 102/347           | 4                     | 6   | 7   | 4   | 11                      | 10                      | 74                       | 49                       | 1.51            | 0.412               | 0.618   |         |
|     | IPI00641950 | GNB2L1      | Lung cancer oncogene 7                                                                  | Raft     | 20        | 243/347           | 38                    | 25  | 25  | 14  | 63                      | 39                      |                          |                          |                 |                     |         |         |
| 347 | IPI00012451 | GNB4        | Guanine nucleotide-binding protein subunit beta 4                                       | Non-raft | 5         | 60/340            | 4                     | 5   | 0   | 0   | 4                       | 5                       | 4                        | 5                        | 0.80            | -0.223              | 0.871   |         |
| 348 | IPI00005677 | GNPAT       | Dihydroxyacetone phosphate acyltransferase                                              | Non-raft | 2         | 22/680            | 2                     | 1   | 1   | 0   | 3                       | 1                       | 3                        | 1                        | 3.00            | 1.099               | 0.275   | M       |
| 349 | IPI00480022 | GOLGA7      | Isoform 1 of Golgin subfamily A member 7                                                | Non-raft | 8         | 98/137            | 8                     | 0   | 6   | 0   | 14                      | 0                       | 29                       | 1                        | 29.00           | 3.367               | 0.000   | H       |
|     | IPI00480022 | GOLGA7      | Isoform 1 of Golgin subfamily A member 7                                                | Raft     | 10        | 108/137           | 10                    | 1   | 5   | 0   | 15                      | 1                       |                          |                          |                 |                     |         |         |
| 350 | IPI00004962 | GOLIM4      | golgi phosphoprotein 4                                                                  | Non-raft | 9         | 116/696           | 9                     | 0   | 4   | 0   | 13                      | 0                       | 13                       | 0                        | 13.00           | 2.565               | 0.006   |         |
| 351 | IPI00018206 | GOT2        | Aspartate aminotransferase, mitochondrial precursor                                     | Non-raft | 11        | 142/430           | 5                     | 6   | 4   | 4   | 9                       | 10                      | 9                        | 10                       | 0.90            | -0.105              | 0.835   |         |
| 352 | IPI00027497 | GPI         | Glucose-6-phosphate isomerase                                                           | Non-raft | 3         | 43/558            | 7                     | 1   | 2   | 0   | 9                       | 1                       | 9                        | 1                        | 9.00            | 2.197               | 0.021   |         |
| 353 | IPI00217481 | GPR126      | Developmentally regulated G-protein-coupled receptor beta 1                             | Non-raft | 7         | 97/1250           | 6                     | 0   | 5   | 0   | 11                      | 0                       | 15                       | 0                        | 15.00           | 2.708               | 0.003   |         |
|     | IPI00217481 | GPR126      | Developmentally regulated G-protein-coupled receptor beta 1                             | Raft     | 4         | 53/1250           | 2                     | 0   | 2   | 0   | 4                       | 0                       |                          |                          |                 |                     |         |         |
| 354 | IPI00022624 | GPRC5A      | Retinoic acid-induced protein 3                                                         | Non-raft | 7         | 95/357            | 17                    | 1   | 13  | 0   | 30                      | 1                       | 76                       | 3                        | 25.33           | 3.232               | 0.000   |         |
|     | IPI00022624 | GPRC5A      | Retinoic acid-induced protein 3                                                         | Raft     | 10        | 135/357           | 31                    | 2   | 15  | 0   | 46                      | 2                       |                          |                          |                 |                     |         |         |
| 355 | IPI00099883 | GPRC5C      | G-protein coupled receptor family C group 5 member C precursor                          | Raft     | 6         | 51/441            | 9                     | 0   | 0   | 0   | 9                       | 0                       | 9                        | 0                        | 9.00            | 2.197               | 0.021   |         |
| 356 | IPI00332155 | GPRIN1      | Isoform 1 of G protein-regulated inducer of neurite outgrowth 1                         | Non-raft | 2         | 30/1008           | 2                     | 0   | 0   | 0   | 2                       | 0                       | 2                        | 0                        | 2.00            | 0.693               | 0.473   |         |
| 357 | IPI00027831 | GRWD1       | Glutamate-rich WD repeat-containing protein 1                                           | Raft     | 2         | 30/446            | 0                     | 2   | 0   | 0   | 0                       | 2                       | 0                        | 2                        | 0.50            | -0.693              | 0.959   |         |
| 358 | IPI00016862 | GSR         | Isoform Mitochondrial of Glutathione reductase, mitochondrial precursor                 | Non-raft | 3         | 43/522            | 2                     | 2   | 1   | 0   | 3                       | 2                       | 3                        | 2                        | 1.50            | 0.405               | 0.621   |         |
| 359 | IPI00031522 | HADHA       | Trifunctional enzyme subunit alpha, mitochondrial precursor                             | Non-raft | 17        | 230/763           | 13                    | 11  | 8   | 4   | 21                      | 15                      | 33                       | 23                       | 1.43            | 0.361               | 0.643   | H       |
|     | IPI00031522 | HADHA       | Trifunctional enzyme subunit alpha, mitochondrial precursor                             | Raft     | 12        | 154/763           | 9                     | 7   | 3   | 1   | 12                      | 8                       |                          |                          |                 |                     |         |         |
| 360 | IPI00022793 | HADHB       | Trifunctional enzyme beta subunit, mitochondrial precursor                              | Non-raft | 2         | 18/474            | 2                     | 1   | 1   | 0   | 3                       | 1                       | 5                        | 1                        | 5.00            | 1.609               | 0.103   | H       |
|     | IPI00022793 | HADHB       | Trifunctional enzyme beta subunit, mitochondrial precursor                              | Raft     | 2         | 18/474            | 2                     | 0   | 0   | 0   | 2                       | 0                       |                          |                          |                 |                     |         |         |

| No. | Acc.Number  | Gene Symbol | Description                                                        | Fraction | Uni. Pep. | Sequence Coverage | Biological Replicates |     |     |     | Total EXP Each Fraction | Total CON Each Fraction | Total EXP Both Fractions | Total CON Both Fractions | EXP/CON Imputed | Ln(EXP/CON imputed) | P-value | 17-ODYA |
|-----|-------------|-------------|--------------------------------------------------------------------|----------|-----------|-------------------|-----------------------|-----|-----|-----|-------------------------|-------------------------|--------------------------|--------------------------|-----------------|---------------------|---------|---------|
|     |             |             |                                                                    |          |           |                   | 1st                   |     | 2nd |     |                         |                         |                          |                          |                 |                     |         |         |
|     |             |             |                                                                    |          |           |                   | EXP                   | CON | EXP | CON |                         |                         |                          |                          |                 |                     |         |         |
| 361 | IPI00654755 | HBB         | Hemoglobin subunit beta                                            | Non-raft | 2         | 23/147            | 0                     | 0   | 0   | 3   | 0                       | 3                       | 1                        | 5                        | 0.20            | -1.609              | 0.998   |         |
|     | IPI00654755 | HBB         | Hemoglobin subunit beta                                            | Raft     | 2         | 22/147            | 1                     | 1   | 0   | 1   | 1                       | 2                       |                          |                          |                 |                     |         |         |
| 362 | IPI00176692 | hCG_2023776 | PREDICTED: similar to Heterogeneous nuclear ribonucleoprotein A1   | Non-raft | 3         | 59/281            | 2                     | 1   | 2   | 0   | 4                       | 1                       | 8                        | 3                        | 2.67            | 0.981               | 0.329   |         |
|     | IPI00176692 | hCG_2023776 | PREDICTED: similar to Heterogeneous nuclear ribonucleoprotein A1   | Raft     | 5         | 73/281            | 4                     | 2   | 0   | 0   | 4                       | 2                       |                          |                          |                 |                     |         |         |
| 363 | IPI00022228 | HDLBP       | Vigilin                                                            | Raft     | 5         | 70/1268           | 2                     | 4   | 0   | 0   | 2                       | 4                       | 2                        | 4                        | 0.50            | -0.693              | 0.959   |         |
| 364 | IPI00453473 | HIST1H4A    | Histone H4                                                         | Non-raft | 2         | 20/103            | 0                     | 2   | 0   | 0   | 0                       | 2                       | 0                        | 2                        | 0.50            | -0.693              | 0.959   |         |
| 365 | IPI00018246 | HK1         | Isoform 1 of Hexokinase-1                                          | Non-raft | 7         | 91/917            | 2                     | 3   | 3   | 4   | 5                       | 7                       | 5                        | 7                        | 0.71            | -0.336              | 0.899   |         |
| 366 | IPI00743503 | HLA-A       | HLA class I histocompatibility antigen, A-34 alpha chain precursor | Non-raft | 11        | 162/365           | 33                    | 16  | 32  | 6   | 65                      | 22                      | 65                       | 22                       | 2.95            | 1.083               | 0.282   | H       |
| 367 | IPI00471955 | HLA-B       | HLA class I histocompatibility antigen, B-50 alpha chain precursor | Non-raft | 16        | 262/362           | 54                    | 13  | 55  | 7   | 109                     | 20                      | 131                      | 23                       | 5.70            | 1.740               | 0.076   | H       |
|     | IPI00471955 | HLA-B       | HLA class I histocompatibility antigen, B-50 alpha chain precursor | Raft     | 8         | 101/362           | 11                    | 3   | 11  | 0   | 22                      | 3                       |                          |                          |                 |                     |         |         |
| 368 | IPI00473131 | HLA-C       | HLA class I histocompatibility antigen, Cw-6 alpha chain precursor | Non-raft | 18        | 241/366           | 44                    | 17  | 43  | 8   | 87                      | 25                      | 111                      | 28                       | 3.96            | 1.377               | 0.168   | H       |
|     | IPI00473131 | HLA-C       | HLA class I histocompatibility antigen, Cw-6 alpha chain precursor | Raft     | 11        | 154/366           | 13                    | 3   | 11  | 0   | 24                      | 3                       |                          |                          |                 |                     |         |         |
| 369 | IPI00008475 | HMGCS1      | Hydroxymethylglutaryl-CoA synthase, cytoplasmic                    | Non-raft | 8         | 134/520           | 9                     | 0   | 4   | 0   | 13                      | 0                       | 13                       | 0                        | 13.00           | 2.565               | 0.006   |         |
| 370 | IPI00026824 | HMOX2       | Heme oxygenase 2                                                   | Non-raft | 7         | 118/370           | 4                     | 4   | 4   | 0   | 8                       | 4                       | 8                        | 4                        | 2.00            | 0.693               | 0.473   | H       |
| 371 | IPI00011913 | HNRNPA0     | Heterogeneous nuclear ribonucleoprotein A0                         | Raft     | 2         | 33/305            | 2                     | 0   | 1   | 0   | 3                       | 0                       | 3                        | 0                        | 3.00            | 1.099               | 0.275   |         |
| 372 | IPI00215965 | HNRNPA1     | heterogeneous nuclear ribonucleoprotein A1 isoform b               | Non-raft | 4         | 77/372            | 3                     | 2   | 2   | 0   | 5                       | 2                       | 15                       | 7                        | 2.14            | 0.762               | 0.438   |         |
|     | IPI00215965 | HNRNPA1     | heterogeneous nuclear ribonucleoprotein A1 isoform b               | Raft     | 7         | 102/372           | 9                     | 5   | 1   | 0   | 10                      | 5                       |                          |                          |                 |                     |         |         |
| 373 | IPI00396378 | HNRNPA2B1   | Isoform B1 of Heterogeneous nuclear ribonucleoproteins A2/B1       | Raft     | 3         | 34/353            | 2                     | 1   | 0   | 0   | 2                       | 1                       | 2                        | 1                        | 2.00            | 0.693               | 0.473   |         |
| 374 | IPI00027834 | HNRNPL      | heterogeneous nuclear ribonucleoprotein L isoform a                | Raft     | 9         | 190/589           | 8                     | 6   | 1   | 2   | 9                       | 8                       | 9                        | 8                        | 1.13            | 0.118               | 0.753   | M       |
| 375 | IPI00012074 | HNRNPR      | Heterogeneous nuclear ribonucleoprotein R                          | Raft     | 3         | 33/633            | 3                     | 5   | 0   | 0   | 3                       | 5                       | 3                        | 5                        | 0.60            | -0.511              | 0.934   |         |
| 376 | IPI00479217 | HNRNPU      | heterogeneous nuclear ribonucleoprotein U isoform b                | Non-raft | 6         | 59/806            | 4                     | 3   | 0   | 1   | 4                       | 4                       | 4                        | 4                        | 1.00            | 0.000               | 0.799   |         |
| 377 | IPI00419373 | HNRPA3      | Isoform 1 of Heterogeneous nuclear ribonucleoprotein A3            | Raft     | 4         | 71/378            | 4                     | 1   | 1   | 0   | 5                       | 1                       | 5                        | 1                        | 5.00            | 1.609               | 0.103   |         |
| 378 | IPI00028888 | HNRPD       | Isoform 1 of Heterogeneous nuclear ribonucleoprotein D0            | Raft     | 2         | 24/355            | 1                     | 1   | 1   | 0   | 2                       | 1                       | 2                        | 1                        | 2.00            | 0.693               | 0.473   |         |
| 379 | IPI00003881 | HNRPF       | heterogeneous nuclear ribonucleoprotein F                          | Non-raft | 2         | 34/415            | 1                     | 1   | 2   | 0   | 3                       | 1                       | 3                        | 1                        | 3.00            | 1.099               | 0.275   |         |
| 380 | IPI00013881 | HNRPH1      | heterogeneous nuclear ribonucleoprotein H1                         | Non-raft | 2         | 34/449            | 0                     | 1   | 1   | 1   | 1                       | 2                       | 4                        | 3                        | 1.33            | 0.288               | 0.678   |         |
|     | IPI00013881 | HNRPH1      | heterogeneous nuclear ribonucleoprotein H1                         | Raft     | 2         | 33/449            | 2                     | 1   | 1   | 0   | 3                       | 1                       |                          |                          |                 |                     |         |         |
| 381 | IPI00216049 | HNRPK       | Isoform 1 of Heterogeneous nuclear ribonucleoprotein K             | Non-raft | 10        | 127/463           | 6                     | 4   | 4   | 3   | 10                      | 7                       | 17                       | 12                       | 1.42            | 0.348               | 0.649   |         |
|     | IPI00216049 | HNRPK       | Isoform 1 of Heterogeneous nuclear ribonucleoprotein K             | Raft     | 8         | 121/463           | 5                     | 3   | 2   | 2   | 7                       | 5                       |                          |                          |                 |                     |         |         |
| 382 | IPI00171903 | HNRPM       | heterogeneous nuclear ribonucleoprotein M isoform a                | Non-raft | 5         | 70/730            | 3                     | 2   | 2   | 1   | 5                       | 3                       | 20                       | 6                        | 3.33            | 1.204               | 0.231   |         |
|     | IPI00171903 | HNRPM       | heterogeneous nuclear ribonucleoprotein M isoform a                | Raft     | 13        | 146/730           | 13                    | 1   | 2   | 2   | 15                      | 3                       |                          |                          |                 |                     |         |         |
| 383 | IPI00000006 | HRAS        | GTPase HRas precursor                                              | Non-raft | 9         | 85/189            | 9                     | 0   | 13  | 1   | 22                      | 1                       | 22                       | 1                        | 22.00           | 3.091               | 0.001   | H       |
| 384 | IPI00398625 | HRNR        | Hornerin                                                           | Non-raft | 4         | 66/2850           | 4                     | 2   | 0   | 0   | 4                       | 2                       | 19                       | 9                        | 2.11            | 0.747               | 0.445   |         |
|     | IPI00398625 | HRNR        | Hornerin                                                           | Raft     | 11        | 196/2850          | 15                    | 7   | 0   | 0   | 15                      | 7                       |                          |                          |                 |                     |         |         |
| 385 | IPI00017726 | HSD17B10    | hydroxyacyl-Coenzyme A dehydrogenase, type II isoform 1            | Non-raft | 5         | 88/261            | 5                     | 0   | 3   | 0   | 8                       | 0                       | 8                        | 0                        | 8.00            | 2.079               | 0.030   | M       |
| 386 | IPI00019912 | HSD17B4     | Peroxisomal multifunctional enzyme type 2                          | Non-raft | 11        | 147/736           | 8                     | 5   | 4   | 1   | 12                      | 6                       | 12                       | 6                        | 2.00            | 0.693               | 0.473   |         |
| 387 | IPI00382470 | HSP90AA1    | Heat shock protein HSP 90-alpha 2                                  | Non-raft | 14        | 163/854           | 15                    | 15  | 8   | 6   | 23                      | 21                      | 30                       | 31                       | 0.97            | -0.033              | 0.811   |         |
|     | IPI00382470 | HSP90AA1    | Heat shock protein HSP 90-alpha 2                                  | Raft     | 9         | 118/854           | 7                     | 10  | 0   | 0   | 7                       | 10                      |                          |                          |                 |                     |         |         |
| 388 | IPI00414676 | HSP90AB1    | Heat shock protein HSP 90-beta                                     | Non-raft | 24        | 284/724           | 23                    | 24  | 10  | 9   | 33                      | 33                      | 37                       | 38                       | 0.97            | -0.027              | 0.809   |         |
|     | IPI00414676 | HSP90AB1    | Heat shock protein HSP 90-beta                                     | Raft     | 7         | 88/724            | 4                     | 5   | 0   | 0   | 4                       | 5                       |                          |                          |                 |                     |         |         |
| 389 | IPI00555915 | HSP90AB6P   | Heat shock protein 90Bf                                            | Non-raft | 2         | 20/361            | 1                     | 2   | 0   | 0   | 1                       | 2                       | 1                        | 2                        | 0.50            | -0.693              | 0.959   |         |
| 390 | IPI00027230 | HSP90B1     | Endoplasmic precursor                                              | Non-raft | 17        | 204/803           | 14                    | 11  | 6   | 4   | 20                      | 15                      | 20                       | 15                       | 1.33            | 0.288               | 0.678   |         |

| No. | Acc.Number  | Gene Symbol | Description                                                                        | Fraction | Uni. Pep. | Sequence Coverage | Biological Replicates |     |     |     | Total EXP Each Fraction | Total CON Each Fraction | Total EXP Both Fractions | Total CON Both Fractions | EXP/CON Imputed | Ln(EXP/CON imputed) | P-value | 17-ODYA |
|-----|-------------|-------------|------------------------------------------------------------------------------------|----------|-----------|-------------------|-----------------------|-----|-----|-----|-------------------------|-------------------------|--------------------------|--------------------------|-----------------|---------------------|---------|---------|
|     |             |             |                                                                                    |          |           |                   | 1st                   |     | 2nd |     |                         |                         |                          |                          |                 |                     |         |         |
|     |             |             |                                                                                    |          |           |                   | EXP                   | CON | EXP | CON |                         |                         |                          |                          |                 |                     |         |         |
| 391 | IPI00304925 | HSPA1A      | Heat shock 70 kDa protein 1                                                        | Non-raft | 8         | 96/641            | 4                     | 6   | 3   | 4   | 7                       | 10                      | 10                       | 10                       | 1.00            | 0.000               | 0.799   | H       |
|     | IPI00304925 | HSPA1A      | Heat shock 70 kDa protein 1                                                        | Raft     | 3         | 40/641            | 0                     | 0   | 3   | 0   | 3                       | 0                       |                          |                          |                 |                     |         |         |
| 392 | IPI00301277 | HSPA1L      | Heat shock 70 kDa protein 1L                                                       | Non-raft | 7         | 87/641            | 4                     | 5   | 3   | 3   | 7                       | 8                       | 8                        | 9                        | 0.89            | -0.118              | 0.839   |         |
|     | IPI00301277 | HSPA1L      | Heat shock 70 kDa protein 1L                                                       | Raft     | 2         | 31/641            | 1                     | 1   | 0   | 0   | 1                       | 1                       |                          |                          |                 |                     |         |         |
| 393 | IPI00002966 | HSPA4       | Heat shock 70 kDa protein 4                                                        | Non-raft | 8         | 101/840           | 7                     | 4   | 1   | 1   | 8                       | 5                       | 8                        | 5                        | 1.60            | 0.470               | 0.589   |         |
| 394 | IPI00003362 | HSPA5       | Hypothetical protein                                                               | Non-raft | 29        | 309/655           | 35                    | 36  | 21  | 20  | 56                      | 56                      | 69                       | 66                       | 1.05            | 0.044               | 0.782   |         |
|     | IPI00003362 | HSPA5       | Hypothetical protein                                                               | Raft     | 11        | 141/655           | 7                     | 6   | 6   | 4   | 13                      | 10                      |                          |                          |                 |                     |         |         |
| 395 | IPI00003865 | HSPA8       | Isoform 1 of Heat shock cognate 71 kDa protein                                     | Non-raft | 19        | 235/646           | 21                    | 13  | 10  | 6   | 31                      | 19                      | 41                       | 24                       | 1.71            | 0.536               | 0.555   |         |
|     | IPI00003865 | HSPA8       | Isoform 1 of Heat shock cognate 71 kDa protein                                     | Raft     | 13        | 167/646           | 4                     | 3   | 6   | 2   | 10                      | 5                       |                          |                          |                 |                     |         |         |
| 396 | IPI00007765 | HSPA9       | Stress-70 protein, mitochondrial precursor                                         | Non-raft | 19        | 275/679           | 16                    | 25  | 8   | 13  | 24                      | 38                      | 38                       | 52                       | 0.73            | -0.314              | 0.894   |         |
|     | IPI00007765 | HSPA9       | Stress-70 protein, mitochondrial precursor                                         | Raft     | 15        | 197/679           | 8                     | 10  | 6   | 4   | 14                      | 14                      |                          |                          |                 |                     |         |         |
| 397 | IPI00472102 | HSPD1       | Heat shock protein 60                                                              | Non-raft | 23        | 264/573           | 30                    | 16  | 17  | 8   | 47                      | 24                      | 47                       | 24                       | 1.96            | 0.672               | 0.484   |         |
| 398 | IPI00024284 | HSPG2       | Basement membrane-specific heparan sulfate proteoglycan core protein precursor     | Raft     | 4         | 50/4391           | 0                     | 4   | 0   | 0   | 0                       | 4                       | 0                        | 4                        | 0.25            | -1.386              | 0.996   |         |
| 399 | IPI00218993 | HSPH1       | Isoform Beta of Heat-shock protein 105 kDa                                         | Non-raft | 5         | 65/814            | 4                     | 2   | 0   | 1   | 4                       | 3                       | 4                        | 3                        | 1.33            | 0.288               | 0.678   |         |
| 400 | IPI00013234 | IARS        | IARS protein                                                                       | Non-raft | 4         | 43/1266           | 3                     | 1   | 0   | 0   | 3                       | 1                       | 3                        | 1                        | 3.00            | 1.099               | 0.275   | M       |
| 401 | IPI00008494 | ICAM1       | Intercellular adhesion molecule 1 precursor                                        | Non-raft | 11        | 117/532           | 9                     | 8   | 1   | 3   | 10                      | 11                      | 10                       | 11                       | 0.91            | -0.095              | 0.832   |         |
| 402 | IPI00030702 | IDH3A       | Isoform 1 of Isocitrate dehydrogenase [NAD] subunit alpha, mitochondrial precursor | Non-raft | 2         | 18/366            | 1                     | 1   | 0   | 0   | 1                       | 1                       | 1                        | 1                        | 1.00            | 0.000               | 0.799   |         |
| 403 | IPI00289819 | IGF2R       | Cation-independent mannose-6-phosphate receptor precursor                          | Non-raft | 11        | 135/2491          | 7                     | 6   | 4   | 1   | 11                      | 7                       | 21                       | 7                        | 3.00            | 1.099               | 0.275   | H       |
|     | IPI00289819 | IGF2R       | Cation-independent mannose-6-phosphate receptor precursor                          | Raft     | 10        | 108/2491          | 10                    | 0   | 0   | 0   | 10                      | 0                       |                          |                          |                 |                     |         |         |
| 404 | IPI00056478 | IGSF8       | Isoform 1 of Immunoglobulin superfamily member 8 precursor                         | Non-raft | 3         | 40/613            | 1                     | 0   | 3   | 0   | 4                       | 0                       | 4                        | 0                        | 4.00            | 1.386               | 0.165   | H       |
| 405 | IPI00788962 | IL10RB      | Protein                                                                            | Non-raft | 2         | 23/292            | 2                     | 0   | 1   | 0   | 3                       | 0                       | 3                        | 0                        | 3.00            | 1.099               | 0.275   |         |
| 406 | IPI00006774 | IL27RA      | Interleukin-27 receptor subunit alpha                                              | Non-raft | 2         | 37/725            | 1                     | 0   | 1   | 0   | 2                       | 0                       | 2                        | 0                        | 2.00            | 0.693               | 0.473   |         |
| 407 | IPI00297124 | IL6ST       | Isoform 1 of Interleukin-6 receptor beta chain precursor                           | Non-raft | 2         | 27/918            | 1                     | 0   | 2   | 0   | 3                       | 0                       | 3                        | 0                        | 3.00            | 1.099               | 0.275   |         |
| 408 | IPI00005198 | ILF2        | Interleukin enhancer-binding factor 2                                              | Non-raft | 2         | 24/390            | 1                     | 1   | 0   | 0   | 1                       | 1                       | 6                        | 4                        | 1.50            | 0.405               | 0.621   | M       |
|     | IPI00005198 | ILF2        | Interleukin enhancer-binding factor 2                                              | Raft     | 4         | 56/390            | 2                     | 2   | 3   | 1   | 5                       | 3                       |                          |                          |                 |                     |         |         |
| 409 | IPI00219330 | ILF3        | Isoform 5 of Interleukin enhancer-binding factor 3                                 | Non-raft | 3         | 39/690            | 2                     | 0   | 1   | 0   | 3                       | 0                       | 9                        | 6                        | 1.50            | 0.405               | 0.621   |         |
|     | IPI00219330 | ILF3        | Isoform 5 of Interleukin enhancer-binding factor 3                                 | Raft     | 8         | 92/690            | 6                     | 6   | 0   | 0   | 6                       | 6                       |                          |                          |                 |                     |         |         |
| 410 | IPI00554541 | ILVBL       | ilvB (bacterial acetolactate synthase)-like isoform 1                              | Non-raft | 3         | 49/632            | 2                     | 0   | 2   | 0   | 4                       | 0                       | 4                        | 0                        | 4.00            | 1.386               | 0.165   |         |
| 411 | IPI00291510 | IMPDH2      | Inosine-5'-monophosphate dehydrogenase 2                                           | Non-raft | 2         | 31/514            | 1                     | 0   | 1   | 0   | 2                       | 0                       | 6                        | 4                        | 1.50            | 0.405               |         | M       |
|     | IPI00291510 | IMPDH2      | Inosine-5'-monophosphate dehydrogenase 2                                           | Raft     | 6         | 92/514            | 2                     | 4   | 2   | 0   | 4                       | 4                       |                          |                          |                 |                     |         |         |
| 412 | IPI00032262 | INPP5A      | Type I inositol-1,4,5-trisphosphate 5-phosphatase                                  | Raft     | 2         | 19/412            | 2                     | 0   | 0   | 0   | 2                       | 0                       | 2                        | 0                        | 2.00            | 0.693               | 0.473   |         |
| 413 | IPI00009342 | IQGAP1      | Ras GTPase-activating-like protein IQGAP1                                          | Non-raft | 4         | 50/1657           | 1                     | 4   | 0   | 1   | 1                       | 5                       | 1                        | 5                        | 0.20            | -1.609              | 0.998   | M       |
| 414 | IPI00013744 | ITGA2       | Integrin alpha-2 precursor                                                         | Non-raft | 10        | 133/1181          | 7                     | 4   | 3   | 2   | 10                      | 6                       | 10                       | 6                        | 1.67            | 0.511               | 0.568   |         |
| 415 | IPI00215995 | ITGA3       | Isoform Alpha-3A of Integrin alpha-3 precursor                                     | Non-raft | 14        | 166/1051          | 15                    | 7   | 16  | 2   | 31                      | 9                       | 34                       | 9                        | 3.78            | 1.329               | 0.185   |         |
|     | IPI00215995 | ITGA3       | Isoform Alpha-3A of Integrin alpha-3 precursor                                     | Raft     | 7         | 40/1051           | 2                     | 0   | 1   | 0   | 3                       | 0                       |                          |                          |                 |                     |         |         |
| 416 | IPI00306604 | ITGA5       | Integrin alpha-5 precursor                                                         | Non-raft | 3         | 42/1049           | 1                     | 2   | 0   | 1   | 1                       | 3                       | 1                        | 3                        | 0.33            | -1.099              | 0.988   |         |
| 417 | IPI00010697 | ITGA6       | Isoform Alpha-6X1X2B of Integrin alpha-6 precursor                                 | Non-raft | 3         | 38/1130           | 2                     | 0   | 3   | 0   | 5                       | 0                       | 5                        | 0                        | 5.00            | 1.609               | 0.103   |         |
| 418 | IPI00027505 | ITGAV       | Integrin alpha-V precursor                                                         | Non-raft | 3         | 33/1048           | 1                     | 2   | 0   | 1   | 1                       | 3                       | 1                        | 3                        | 0.33            | -1.099              | 0.988   |         |
| 419 | IPI00217561 | ITGB1       | Isoform Beta-1C of Integrin beta-1 precursor                                       | Raft     | 4         | 59/825            | 0                     | 4   | 0   | 2   | 0                       | 6                       | 0                        | 6                        | 0.17            | -1.792              | 0.941   |         |
| 420 | IPI00645194 | ITGB1       | integrin beta 1 isoform 1A precursor                                               | Non-raft | 25        | 276/798           | 22                    | 46  | 17  | 22  | 39                      | 68                      | 39                       | 68                       | 0.57            | -0.556              | 0.999   |         |
| 421 | IPI00027422 | ITGB4       | Isoform Beta-4C of Integrin beta-4 precursor                                       | Non-raft | 14        | 158/1822          | 10                    | 1   | 7   | 0   | 17                      | 1                       | 17                       | 1                        | 17.00           | 2.833               | 0.002   |         |
| 422 | IPI00031821 | ITM2B       | Integral membrane protein 2B                                                       | Raft     | 3         | 48/266            | 3                     | 0   | 0   | 0   | 3                       | 0                       | 3                        | 0                        | 3.00            | 1.099               | 0.275   |         |
| 423 | IPI00016014 | ITM2C       | Isoform 1 of Integral membrane protein 2C                                          | Non-raft | 5         | 68/267            | 4                     | 0   | 3   | 0   | 7                       | 0                       | 14                       | 0                        | 14.00           | 2.639               | 0.005   |         |
|     | IPI00016014 | ITM2C       | Isoform 1 of Integral membrane protein 2C                                          | Raft     | 7         | 97/267            | 6                     | 0   | 1   | 0   | 7                       | 0                       |                          |                          |                 |                     |         |         |
| 424 | IPI00011916 | JTV1        | Multisynthetase complex auxiliary component p38                                    | Non-raft | 2         | 21/320            | 2                     | 1   | 0   | 0   | 2                       | 1                       | 2                        | 1                        | 2.00            | 0.693               | 0.473   |         |
| 425 | IPI00554711 | JUP         | Junction plakoglobin                                                               | Non-raft | 13        | 183/745           | 7                     | 6   | 6   | 10  | 13                      | 16                      | 39                       | 37                       | 1.05            | 0.053               | 0.779   |         |

| No. | Acc.Number  | Gene Symbol | Description                                                                     | Fraction | Uni. Pep. | Sequence Coverage | Biological Replicates |     |     |     | Total EXP Each Fraction | Total CON Each Fraction | Total EXP Both Fractions | Total CON Both Fractions | EXP/CON Imputed | Ln(EXP/CON imputed) | P-value | 17-ODYA |
|-----|-------------|-------------|---------------------------------------------------------------------------------|----------|-----------|-------------------|-----------------------|-----|-----|-----|-------------------------|-------------------------|--------------------------|--------------------------|-----------------|---------------------|---------|---------|
|     |             |             |                                                                                 |          |           |                   | 1st                   |     | 2nd |     |                         |                         |                          |                          |                 |                     |         |         |
|     |             |             |                                                                                 |          |           |                   | EXP                   | CON | EXP | CON |                         |                         |                          |                          |                 |                     |         |         |
|     | IPI00554711 | JUP         | Junction plakoglobin                                                            | Raft     | 19        | 265/745           | 20                    | 14  | 6   | 7   | 26                      | 21                      |                          |                          |                 |                     |         |         |
| 426 | IPI00014238 | KARS        | Lysyl-tRNA synthetase                                                           | Non-raft | 2         | 27/597            | 3                     | 2   | 2   | 2   | 5                       | 4                       | 9                        | 7                        | 1.29            | 0.251               | 0.695   | M       |
|     | IPI00014238 | KARS        | Lysyl-tRNA synthetase                                                           | Raft     | 5         | 57/597            | 4                     | 3   | 0   | 0   | 4                       | 3                       |                          |                          |                 |                     |         |         |
| 427 | IPI00029046 | KIAA0152    | Protein KIAA0152 precursor                                                      | Non-raft | 9         | 103/292           | 13                    | 2   | 5   | 2   | 18                      | 4                       | 33                       | 4                        | 8.25            | 2.110               | 0.028   | H       |
|     | IPI00029046 | KIAA0152    | Protein KIAA0152 precursor                                                      | Raft     | 5         | 57/292            | 8                     | 0   | 7   | 0   | 15                      | 0                       |                          |                          |                 |                     |         |         |
| 428 | IPI00004584 | KIAA0391    | Protein KIAA0391                                                                | Non-raft | 3         | 30/567            | 2                     | 2   | 2   | 1   | 4                       | 3                       | 4                        | 3                        | 1.33            | 0.288               | 0.678   |         |
| 429 | IPI00006130 | KIAA0494    | Uncharacterized calcium-binding protein KIAA0494                                | Non-raft | 2         | 32/495            | 1                     | 0   | 2   | 0   | 3                       | 0                       | 3                        | 0                        | 3.00            | 1.099               | 0.275   | M       |
| 430 | IPI00006499 | KIAA0753    | KIAA0753                                                                        | Non-raft | 2         | 16/967            | 2                     | 0   | 0   | 1   | 2                       | 1                       | 2                        | 1                        | 2.00            | 0.693               | 0.473   |         |
| 431 | IPI00217007 | KIAA2013    | Novel protein                                                                   | Non-raft | 2         | 27/667            | 2                     | 0   | 1   | 0   | 3                       | 0                       | 3                        | 0                        | 3.00            | 1.099               | 0.275   | M       |
| 432 | IPI00001639 | KPNB1       | Importin beta-1 subunit                                                         | Non-raft | 8         | 95/876            | 7                     | 4   | 4   | 5   | 11                      | 9                       | 15                       | 10                       | 1.50            | 0.405               | 0.621   | H       |
|     | IPI00001639 | KPNB1       | Importin beta-1 subunit                                                         | Raft     | 4         | 58/876            | 4                     | 1   | 0   | 0   | 4                       | 1                       |                          |                          |                 |                     |         |         |
| 433 | IPI00423568 | KRAS        | Isoform 2A of GTPase KRas                                                       | Non-raft | 7         | 80/189            | 6                     | 0   | 7   | 0   | 13                      | 0                       | 13                       | 0                        | 13.00           | 2.565               | 0.006   | H       |
| 434 | IPI00328753 | KTN1        | Isoform 1 of Kinectin                                                           | Raft     | 13        | 160/1357          | 9                     | 9   | 0   | 0   | 9                       | 9                       | 9                        | 9                        | 1.00            | 0.000               | 0.799   |         |
| 435 | IPI00294186 | LACTB       | Isoform 1 of Serine beta-lactamase-like protein LACTB                           | Raft     | 4         | 53/547            | 3                     | 2   | 0   | 0   | 3                       | 2                       | 3                        | 2                        | 1.50            | 0.405               | 0.621   |         |
| 436 | IPI00641693 | LAMA5       | 400 kDa protein                                                                 | Raft     | 10        | 149/3695          | 4                     | 8   | 0   | 0   | 4                       | 8                       | 4                        | 8                        | 0.50            | -0.693              | 0.959   |         |
| 437 | IPI00296922 | LAMB2       | Laminin beta-2 chain precursor                                                  | Raft     | 7         | 88/1798           | 3                     | 4   | 0   | 0   | 3                       | 4                       | 3                        | 4                        | 0.75            | -0.288              | 0.888   |         |
| 438 | IPI00299404 | LAMB3       | Laminin beta-3 chain precursor                                                  | Non-raft | 4         | 64/1172           | 1                     | 3   | 0   | 0   | 1                       | 3                       | 1                        | 3                        | 0.33            | -1.099              | 0.988   |         |
| 439 | IPI00298281 | LAMC1       | Laminin gamma-1 chain precursor                                                 | Non-raft | 3         | 45/1609           | 0                     | 3   | 0   | 0   | 0                       | 3                       | 3                        | 8                        | 0.38            | -0.981              | 0.983   |         |
|     | IPI00298281 | LAMC1       | Laminin gamma-1 chain precursor                                                 | Raft     | 6         | 82/1609           | 3                     | 5   | 0   | 0   | 3                       | 5                       |                          |                          |                 |                     |         |         |
| 440 | IPI00004503 | LAMP1       | lysosomal-associated membrane protein 1                                         | Non-raft | 4         | 49/417            | 4                     | 1   | 1   | 0   | 5                       | 1                       | 5                        | 1                        | 5.00            | 1.609               | 0.103   |         |
| 441 | IPI00419237 | LAP3        | leucine aminopeptidase 3                                                        | Non-raft | 3         | 35/519            | 3                     | 1   | 1   | 1   | 4                       | 2                       | 4                        | 2                        | 2.00            | 0.693               | 0.473   |         |
| 442 | IPI00014172 | LAPTM4A     | Lysosomal-associated transmembrane protein 4A                                   | Non-raft | 4         | 47/233            | 4                     | 0   | 3   | 0   | 7                       | 0                       | 13                       | 0                        | 13.00           | 2.565               | 0.006   |         |
|     | IPI00014172 | LAPTM4A     | Lysosomal-associated transmembrane protein 4A                                   | Raft     | 4         | 55/233            | 4                     | 0   | 2   | 0   | 6                       | 0                       |                          |                          |                 |                     |         |         |
| 443 | IPI00395347 | LARP4       | c-Mpl binding protein isoform a                                                 | Raft     | 4         | 34/724            | 3                     | 3   | 1   | 0   | 4                       | 3                       | 4                        | 3                        | 1.33            | 0.288               | 0.678   |         |
| 444 | IPI00103994 | LARS        | Leucyl-tRNA synthetase, cytoplasmic                                             | Non-raft | 3         | 53/1176           | 2                     | 0   | 1   | 0   | 3                       | 0                       | 3                        | 0                        | 3.00            | 1.099               | 0.275   | H       |
| 445 | IPI00000861 | LASP1       | Isoform 1 of LIM and SH3 domain protein 1                                       | Non-raft | 3         | 39/261            | 2                     | 3   | 0   | 0   | 2                       | 3                       | 2                        | 3                        | 0.67            | -0.405              | 0.914   |         |
| 446 | IPI00305304 | LASS2       | LAG1 longevity assurance homolog 2                                              | Non-raft | 2         | 25/380            | 1                     | 1   | 0   | 0   | 1                       | 1                       | 1                        | 1                        | 1.00            | 0.000               | 0.799   |         |
| 447 | IPI00395993 | LAT2        | Isoform 1 of Linker for activation of T-cells family member 2                   | Raft     | 2         | 33/243            | 2                     | 0   | 0   | 0   | 2                       | 0                       | 2                        | 0                        | 2.00            | 0.693               | 0.473   |         |
| 448 | IPI00292135 | LBR         | Lamin-B receptor                                                                | Non-raft | 2         | 34/615            | 3                     | 2   | 2   | 0   | 5                       | 2                       | 5                        | 2                        | 2.50            | 0.916               | 0.360   |         |
| 449 | IPI00394952 | LCK         | lymphocyte-specific protein tyrosine kinase precursor                           | Non-raft | 2         | 18/536            | 0                     | 0   | 2   | 0   | 2                       | 0                       | 2                        | 0                        | 2.00            | 0.693               | 0.473   | H       |
| 450 | IPI00217966 | LDHA        | lactate dehydrogenase A                                                         | Non-raft | 12        | 162/332           | 15                    | 8   | 4   | 1   | 19                      | 9                       | 19                       | 9                        | 2.11            | 0.747               | 0.445   |         |
| 451 | IPI00219217 | LDHB        | L-lactate dehydrogenase B chain                                                 | Non-raft | 6         | 74/334            | 5                     | 7   | 2   | 1   | 7                       | 8                       | 7                        | 8                        | 0.88            | -0.134              | 0.844   |         |
| 452 | IPI00000070 | LDLR        | Low-density lipoprotein receptor precursor                                      | Non-raft | 6         | 71/860            | 3                     | 5   | 1   | 1   | 4                       | 6                       | 4                        | 6                        | 0.67            | -0.405              | 0.914   |         |
| 453 | IPI00045839 | LEPRE1      | Isoform 3 of Prolyl 3-hydroxylase 1 precursor                                   | Non-raft | 2         | 22/804            | 1                     | 1   | 1   | 0   | 2                       | 1                       | 2                        | 1                        | 2.00            | 0.693               | 0.473   |         |
| 454 | IPI00219219 | LGALS1      | Galectin-1                                                                      | Non-raft | 6         | 77/135            | 13                    | 1   | 13  | 2   | 26                      | 3                       | 55                       | 15                       | 3.67            | 1.299               | 0.195   |         |
|     | IPI00219219 | LGALS1      | Galectin-1                                                                      | Raft     | 9         | 103/135           | 18                    | 12  | 11  | 0   | 29                      | 12                      |                          |                          |                 |                     |         |         |
| 455 | IPI00008918 | LIMA1       | Isoform Beta of LIM domain and actin-binding protein 1                          | Raft     | 11        | 147/759           | 11                    | 10  | 2   | 0   | 13                      | 10                      | 13                       | 10                       | 1.30            | 0.262               | 0.690   |         |
| 456 | IPI00009950 | LMAN2       | Vesicular integral-membrane protein VIP36 precursor                             | Non-raft | 2         | 23/356            | 1                     | 1   | 0   | 0   | 1                       | 1                       | 1                        | 1                        | 1.00            | 0.000               | 0.799   |         |
| 457 | IPI00020007 | LMBRD1      | LMBR1 domain containing 1                                                       | Non-raft | 2         | 26/540            | 2                     | 0   | 1   | 0   | 3                       | 0                       | 3                        | 0                        | 3.00            | 1.099               | 0.275   |         |
| 458 | IPI00021405 | LMNA        | Isoform A of Lamin-A/C                                                          | Raft     | 22        | 275/664           | 20                    | 17  | 3   | 4   | 23                      | 21                      | 23                       | 21                       | 1.10            | 0.091               | 0.764   |         |
| 459 | IPI00221240 | LNPEP       | Isoform 2 of Leucyl-cystinyl aminopeptidase                                     | Non-raft | 17        | 184/1011          | 14                    | 0   | 6   | 0   | 20                      | 0                       | 20                       | 0                        | 20.00           | 2.996               | 0.001   | H       |
| 460 | IPI00293336 | LOC153364   | similar to metallo-beta-lactamase superfamily protein                           | Non-raft | 6         | 73/279            | 5                     | 0   | 1   | 0   | 6                       | 0                       | 6                        | 0                        | 6.00            | 1.792               | 0.067   | M       |
| 461 | IPI00373972 | LOC388564   | PREDICTED: hypothetical protein                                                 | Non-raft | 2         | 20/176            | 2                     | 0   | 1   | 0   | 3                       | 0                       | 5                        | 0                        | 5.00            | 1.609               | 0.103   |         |
|     | IPI00373972 | LOC388564   | PREDICTED: hypothetical protein                                                 | Raft     | 2         | 20/176            | 2                     | 0   | 0   | 0   | 2                       | 0                       |                          |                          |                 |                     |         |         |
| 462 | IPI00383071 | LOC388642   | RcTPI1 (Fragment)                                                               | Raft     | 2         | 23/249            | 2                     | 1   | 0   | 0   | 2                       | 1                       | 2                        | 1                        | 2.00            | 0.693               | 0.473   |         |
| 463 | IPI00291695 | LOC493869   | CDNA FLJ23636 fis, clone CAS07176                                               | Non-raft | 3         | 35/209            | 2                     | 0   | 1   | 0   | 3                       | 0                       | 3                        | 0                        | 3.00            | 1.099               | 0.275   |         |
| 464 | IPI00738655 | LOC653781   | PREDICTED: similar to Prostate, ovary, testis expressed protein on chromosome 2 | Raft     | 6         | 57/1038           | 4                     | 4   | 16  | 7   | 20                      | 11                      | 20                       | 11                       | 1.82            | 0.598               | 0.523   |         |

| No. | Acc.Number  | Gene Symbol | Description                                                                      | Fraction | Uni. Pep. | Sequence Coverage | Biological Replicates |     |     |     | Total EXP Each Fraction | Total CON Each Fraction | Total EXP Both Fractions | Total CON Both Fractions | EXP/CON Imputed | Ln(EXP/CON imputed) | P-value | 17-ODYA |
|-----|-------------|-------------|----------------------------------------------------------------------------------|----------|-----------|-------------------|-----------------------|-----|-----|-----|-------------------------|-------------------------|--------------------------|--------------------------|-----------------|---------------------|---------|---------|
|     |             |             |                                                                                  |          |           |                   | 1st                   |     | 2nd |     |                         |                         |                          |                          |                 |                     |         |         |
|     |             |             |                                                                                  |          |           |                   | EXP                   | CON | EXP | CON |                         |                         |                          |                          |                 |                     |         |         |
| 465 | IPI00171626 | LPCAT1      | 1-acylglycerophosphocholine O-acyltransferase 1                                  | Non-raft | 6         | 84/534            | 6                     | 3   | 2   | 2   | 8                       | 5                       | 8                        | 5                        | 1.60            | 0.470               | 0.589   |         |
| 466 | IPI00020557 | LRP1        | Low-density lipoprotein receptor-related protein 1 precursor                     | Non-raft | 4         | 54/4544           | 1                     | 4   | 0   | 0   | 1                       | 4                       | 1                        | 4                        | 0.25            | -1.386              | 0.996   |         |
| 467 | IPI00414231 | LRP10       | Isoform 1 of Low-density lipoprotein receptor-related protein 10 precursor       | Non-raft | 2         | 28/713            | 2                     | 0   | 1   | 0   | 3                       | 0                       | 5                        | 0                        | 5.00            | 1.609               | 0.103   |         |
|     | IPI00414231 | LRP10       | Isoform 1 of Low-density lipoprotein receptor-related protein 10 precursor       | Raft     | 2         | 28/713            | 1                     | 0   | 1   | 0   | 2                       | 0                       |                          |                          |                 |                     |         |         |
| 468 | IPI00021027 | LRP12       | Low-density lipoprotein receptor-related protein 12 precursor                    | Non-raft | 2         | 18/859            | 2                     | 0   | 0   | 0   | 2                       | 0                       | 2                        | 0                        | 2.00            | 0.693               | 0.473   |         |
| 469 | IPI00783271 | LRPPRC      | Leucine-rich PPR motif-containing protein                                        | Non-raft | 21        | 279/1394          | 13                    | 12  | 3   | 5   | 16                      | 17                      | 16                       | 17                       | 0.94            | -0.061              | 0.821   |         |
| 470 | IPI00427739 | LRRC1       | Isoform 1 of Leucine-rich repeat-containing protein 1                            | Non-raft | 12        | 205/524           | 13                    | 0   | 14  | 0   | 27                      | 0                       | 30                       | 0                        | 30.00           | 3.401               | 0.000   | M       |
|     | IPI00427739 | LRRC1       | Isoform 1 of Leucine-rich repeat-containing protein 1                            | Raft     | 3         | 47/524            | 3                     | 0   | 0   | 0   | 3                       | 0                       |                          |                          |                 |                     |         |         |
| 471 | IPI00170935 | LRRC47      | Leucine-rich repeat-containing protein 47                                        | Raft     | 2         | 30/583            | 0                     | 0   | 2   | 0   | 2                       | 0                       | 2                        | 0                        | 2.00            | 0.693               | 0.473   |         |
| 472 | IPI00396321 | LRRC59      | Leucine-rich repeat-containing protein 59                                        | Non-raft | 4         | 47/307            | 2                     | 2   | 1   | 0   | 3                       | 2                       | 6                        | 3                        | 2.00            | 0.693               | 0.473   |         |
|     | IPI00396321 | LRRC59      | Leucine-rich repeat-containing protein 59                                        | Raft     | 2         | 22/307            | 3                     | 1   | 0   | 0   | 3                       | 1                       |                          |                          |                 |                     |         |         |
| 473 | IPI00410324 | LSM12       | LSM12 homolog                                                                    | Raft     | 2         | 24/195            | 1                     | 2   | 0   | 0   | 1                       | 2                       | 1                        | 2                        | 0.50            | -0.693              | 0.959   |         |
| 474 | IPI00409640 | LSR         | Isoform 1 of Lipolysis-stimulated lipoprotein receptor                           | Non-raft | 9         | 111/649           | 18                    | 1   | 11  | 0   | 29                      | 1                       | 55                       | 1                        | 55.00           | 4.007               | 0.000   |         |
|     | IPI00409640 | LSR         | Isoform 1 of Lipolysis-stimulated lipoprotein receptor                           | Raft     | 12        | 187/649           | 17                    | 0   | 9   | 0   | 26                      | 0                       |                          |                          |                 |                     |         |         |
| 475 | IPI00219077 | LTA4H       | LTA4H protein                                                                    | Non-raft | 2         | 23/611            | 0                     | 2   | 0   | 0   | 0                       | 2                       | 0                        | 2                        | 0.50            | -0.693              | 0.959   |         |
| 476 | IPI00298625 | LYN         | v-yes-1 Yamaguchi sarcoma viral related oncogene homolog                         | Non-raft | 25        | 300/512           | 27                    | 1   | 14  | 1   | 41                      | 2                       | 59                       | 3                        | 19.67           | 2.979               | 0.001   |         |
|     | IPI00298625 | LYN         | v-yes-1 Yamaguchi sarcoma viral related oncogene homolog                         | Raft     | 11        | 127/512           | 8                     | 1   | 10  | 0   | 18                      | 1                       |                          |                          |                 |                     |         |         |
| 477 | IPI00007321 | LYPLA1      | Isoform 1 of Acyl-protein thioesterase 1                                         | Non-raft | 2         | 27/263            | 2                     | 0   | 1   | 0   | 3                       | 0                       | 3                        | 0                        | 3.00            | 1.099               | 0.275   |         |
| 478 | IPI00025049 | M6PR        | Cation-dependent mannose-6-phosphate receptor precursor                          | Non-raft | 7         | 87/277            | 9                     | 3   | 5   | 0   | 14                      | 3                       | 16                       | 3                        | 5.33            | 1.674               | 0.089   |         |
|     | IPI00025049 | M6PR        | Cation-dependent mannose-6-phosphate receptor precursor                          | Raft     | 2         | 32/277            | 1                     | 0   | 1   | 0   | 2                       | 0                       |                          |                          |                 |                     |         |         |
| 479 | IPI00396171 | MAP4        | Isoform 1 of Microtubule-associated protein 4                                    | Non-raft | 3         | 33/1152           | 3                     | 1   | 0   | 0   | 3                       | 1                       | 3                        | 1                        | 3.00            | 1.099               | 0.275   |         |
| 480 | IPI00008240 | MARS        | Methionyl-tRNA synthetase, cytoplasmic                                           | Non-raft | 7         | 73/900            | 5                     | 4   | 3   | 0   | 8                       | 4                       | 8                        | 4                        | 2.00            | 0.693               | 0.473   | M       |
| 481 | IPI00017297 | MATR3       | Matrin-3                                                                         | Raft     | 5         | 89/847            | 5                     | 2   | 0   | 0   | 5                       | 2                       | 5                        | 2                        | 2.50            | 0.916               | 0.360   |         |
| 482 | IPI00016334 | MCAM        | Isoform 1 of Cell surface glycoprotein MUC18 precursor                           | Non-raft | 8         | 123/646           | 5                     | 0   | 8   | 0   | 13                      | 0                       | 13                       | 0                        | 13.00           | 2.565               | 0.006   |         |
| 483 | IPI00784044 | MCCC2       | Isoform 1 of Methylcrotonoyl-CoA carboxylase beta chain, mitochondrial precursor | Non-raft | 2         | 22/563            | 1                     | 0   | 0   | 1   | 1                       | 1                       | 1                        | 1                        | 1.00            | 0.000               | 0.799   |         |
| 484 | IPI00184330 | MCM2        | DNA replication licensing factor MCM2                                            | Non-raft | 4         | 42/904            | 2                     | 2   | 0   | 0   | 2                       | 2                       | 4                        | 3                        | 1.33            | 0.288               | 0.678   | M       |
|     | IPI00184330 | MCM2        | DNA replication licensing factor MCM2                                            | Raft     | 3         | 34/904            | 2                     | 1   | 0   | 0   | 2                       | 1                       |                          |                          |                 |                     |         |         |
| 485 | IPI00299904 | MCM7        | Isoform 1 of DNA replication licensing factor MCM7                               | Non-raft | 3         | 34/719            | 2                     | 1   | 0   | 0   | 2                       | 1                       | 2                        | 1                        | 2.00            | 0.693               | 0.473   | M       |
| 486 | IPI00291005 | MDH1        | Malate dehydrogenase, cytoplasmic                                                | Non-raft | 2         | 26/334            | 1                     | 1   | 0   | 0   | 1                       | 1                       | 1                        | 1                        | 1.00            | 0.000               | 0.799   |         |
| 487 | IPI00291006 | MDH2        | Malate dehydrogenase, mitochondrial precursor                                    | Non-raft | 13        | 166/338           | 13                    | 8   | 4   | 11  | 17                      | 19                      | 17                       | 19                       | 0.89            | -0.111              | 0.837   |         |
| 488 | IPI00418234 | MECP2       | Methyl-CpG-binding protein 2                                                     | Non-raft | 2         | 22/486            | 1                     | 3   | 0   | 0   | 1                       | 3                       | 1                        | 3                        | 0.33            | -1.099              | 0.988   |         |
| 489 | IPI00301139 | MED17       | CRSP complex subunit 6                                                           | Raft     | 4         | 47/651            | 4                     | 2   | 0   | 0   | 4                       | 2                       | 4                        | 2                        | 2.00            | 0.693               | 0.473   |         |
| 490 | IPI00022239 | METAP1      | Methionine aminopeptidase 1                                                      | Non-raft | 2         | 22/386            | 1                     | 1   | 0   | 0   | 1                       | 1                       | 5                        | 2                        | 2.50            | 0.916               | 0.360   |         |
|     | IPI00022239 | METAP1      | Methionine aminopeptidase 1                                                      | Raft     | 3         | 44/386            | 3                     | 1   | 1   | 0   | 4                       | 1                       |                          |                          |                 |                     |         |         |
| 491 | IPI00090807 | METTL7B     | Methyltransferase-like protein 7B precursor                                      | Non-raft | 3         | 42/277            | 3                     | 0   | 1   | 0   | 4                       | 0                       | 4                        | 0                        | 4.00            | 1.386               | 0.165   |         |
| 492 | IPI00002236 | MFGE8       | Lactadherin precursor                                                            | Raft     | 2         | 31/387            | 1                     | 0   | 1   | 0   | 2                       | 0                       | 2                        | 0                        | 2.00            | 0.693               | 0.473   |         |
| 493 | IPI00395906 | MGC59937    | Similar to RIKEN cDNA 2310002J15 gene                                            | Non-raft | 2         | 40/144            | 2                     | 0   | 0   | 0   | 2                       | 0                       | 9                        | 0                        | 9.00            | 2.197               | 0.021   |         |
|     | IPI00395906 | MGC59937    | Similar to RIKEN cDNA 2310002J15 gene                                            | Raft     | 3         | 59/144            | 6                     | 0   | 1   | 0   | 7                       | 0                       |                          |                          |                 |                     |         |         |
| 494 | IPI00004233 | MKI67       | Isoform Long of Antigen KI-67                                                    | Raft     | 6         | 70/3256           | 5                     | 3   | 0   | 0   | 5                       | 3                       | 5                        | 3                        | 1.67            | 0.511               | 0.568   |         |
| 495 | IPI00218398 | MMP14       | Matrix metalloproteinase-14 precursor                                            | Non-raft | 10        | 88/582            | 7                     | 0   | 4   | 0   | 11                      | 0                       | 11                       | 0                        | 11.00           | 2.398               | 0.011   |         |
| 496 | IPI00215610 | MPP1        | 55 kDa erythrocyte membrane protein                                              | Non-raft | 3         | 45/466            | 1                     | 0   | 3   | 0   | 4                       | 0                       | 4                        | 0                        | 4.00            | 1.386               | 0.165   |         |
| 497 | IPI00174976 | MPP5        | Isoform 1 of MAGUK p55 subfamily member 5                                        | Non-raft | 2         | 30/675            | 2                     | 0   | 1   | 0   | 3                       | 0                       | 9                        | 0                        | 9.00            | 2.197               | 0.021   |         |
|     | IPI00174976 | MPP5        | Isoform 1 of MAGUK p55 subfamily member 5                                        | Raft     | 4         | 63/675            | 3                     | 0   | 3   | 0   | 6                       | 0                       |                          |                          |                 |                     |         |         |
| 498 | IPI00303280 | MPP6        | MAGUK p55 subfamily member 6                                                     | Non-raft | 11        | 164/540           | 11                    | 0   | 8   | 0   | 19                      | 0                       | 19                       | 0                        | 19.00           | 2.944               | 0.001   | M       |
| 499 | IPI00017515 | MREG        | DSU protein                                                                      | Non-raft | 4         | 47/214            | 3                     | 0   | 3   | 0   | 6                       | 0                       | 6                        | 0                        | 6.00            | 1.792               | 0.067   | M       |

| No. | Acc.Number  | Gene Symbol | Description                                                                          | Fraction | Uni. Pep. | Sequence Coverage | Biological Replicates |     |     |     | Total EXP Each Fraction | Total CON Each Fraction | Total EXP Both Fractions | Total CON Both Fractions | EXP/CON Imputed | Ln(EXP/CON imputed) | P-value | 17-ODYA |
|-----|-------------|-------------|--------------------------------------------------------------------------------------|----------|-----------|-------------------|-----------------------|-----|-----|-----|-------------------------|-------------------------|--------------------------|--------------------------|-----------------|---------------------|---------|---------|
|     |             |             |                                                                                      |          |           |                   | 1st                   |     | 2nd |     |                         |                         |                          |                          |                 |                     |         |         |
|     |             |             |                                                                                      |          |           |                   | EXP                   | CON | EXP | CON |                         |                         |                          |                          |                 |                     |         |         |
| 500 | IPI00219365 | MSN         | Moesin                                                                               | Non-raft | 15        | 173/577           | 14                    | 3   | 2   | 0   | 16                      | 3                       | 16                       | 3                        | 5.33            | 1.674               | 0.089   |         |
| 501 | IPI00328715 | MTDH        | Protein LYRIC                                                                        | Non-raft | 6         | 74/582            | 7                     | 0   | 6   | 0   | 13                      | 0                       | 27                       | 0                        | 27.00           | 3.296               | 0.000   | H       |
|     | IPI00328715 | MTDH        | Protein LYRIC                                                                        | Raft     | 4         | 47/582            | 7                     | 0   | 7   | 0   | 14                      | 0                       |                          |                          |                 |                     |         |         |
| 502 | IPI00218342 | MTHFD1      | C-1-tetrahydrofolate synthase, cytoplasmic                                           | Non-raft | 12        | 154/935           | 5                     | 7   | 1   | 5   | 6                       | 12                      | 6                        | 12                       | 0.50            | -0.693              | 0.959   |         |
| 503 | IPI00385172 | MUC1        | Mucin 1, transmembrane                                                               | Non-raft | 5         | 67/241            | 3                     | 0   | 5   | 0   | 8                       | 0                       | 20                       | 0                        | 20.00           | 2.996               | 0.001   |         |
|     | IPI00385172 | MUC1        | Mucin 1, transmembrane                                                               | Raft     | 6         | 76/241            | 8                     | 0   | 4   | 0   | 12                      | 0                       |                          |                          |                 |                     |         |         |
| 504 | IPI00102685 | MYADM       | Myeloid-associated differentiation marker                                            | Raft     | 2         | 33/322            | 2                     | 0   | 1   | 0   | 3                       | 0                       | 3                        | 0                        | 3.00            | 1.099               | 0.275   | M       |
| 505 | IPI00019502 | MYH9        | Myosin-9                                                                             | Non-raft | 17        | 240/1960          | 11                    | 14  | 1   | 2   | 12                      | 16                      | 14                       | 16                       | 0.88            | -0.134              | 0.844   |         |
|     | IPI00019502 | MYH9        | Myosin-9                                                                             | Raft     | 2         | 24/1960           | 2                     | 0   | 0   | 0   | 2                       | 0                       |                          |                          |                 |                     |         |         |
| 506 | IPI00010418 | MYO1C       | Myosin 1c                                                                            | Raft     | 4         | 56/1028           | 2                     | 2   | 0   | 0   | 2                       | 2                       | 2                        | 2                        | 1.00            | 0.000               | 0.799   |         |
| 507 | IPI00023748 | NACA        | Nascent polypeptide-associated complex subunit alpha                                 | Raft     | 3         | 47/215            | 3                     | 1   | 1   | 0   | 4                       | 1                       | 4                        | 1                        | 4.00            | 1.386               | 0.165   |         |
| 508 | IPI00023860 | NAP1L1      | Nucleosome assembly protein 1-like 1                                                 | Non-raft | 2         | 28/391            | 1                     | 0   | 0   | 1   | 1                       | 1                       | 1                        | 1                        | 1.00            | 0.000               | 0.799   |         |
| 509 | IPI00306960 | NARS        | Asparaginyl-tRNA synthetase, cytoplasmic                                             | Non-raft | 2         | 22/548            | 2                     | 0   | 0   | 0   | 2                       | 0                       | 2                        | 0                        | 2.00            | 0.693               | 0.473   |         |
| 510 | IPI00444262 | NCL         | CDNA FLJ45706 fis, clone FEBRA2028457, highly similar to Nucleolin                   | Non-raft | 2         | 19/603            | 2                     | 0   | 0   | 0   | 2                       | 0                       | 2                        | 0                        | 2.00            | 0.693               | 0.473   |         |
| 511 | IPI00470649 | NCLN        | Isoform 1 of Nicalin precursor                                                       | Non-raft | 6         | 73/563            | 6                     | 2   | 1   | 0   | 7                       | 2                       | 7                        | 2                        | 3.50            | 1.253               | 0.212   |         |
| 512 | IPI00021983 | NCSTN       | Isoform 1 of Nicastrin precursor                                                     | Non-raft | 5         | 83/709            | 3                     | 0   | 5   | 2   | 8                       | 2                       | 10                       | 2                        | 5.00            | 1.609               | 0.103   |         |
|     | IPI00021983 | NCSTN       | Isoform 1 of Nicastrin precursor                                                     | Raft     | 2         | 20/709            | 2                     | 0   | 0   | 0   | 2                       | 0                       |                          |                          |                 |                     |         |         |
| 513 | IPI00012235 | NDFIP1      | Isoform 1 of NEDD4 family-interacting protein 1                                      | Non-raft | 2         | 28/221            | 2                     | 0   | 0   | 0   | 2                       | 0                       | 5                        | 0                        | 5.00            | 1.609               | 0.103   | M       |
|     | IPI00012235 | NDFIP1      | Isoform 1 of NEDD4 family-interacting protein 1                                      | Raft     | 3         | 28/221            | 2                     | 0   | 1   | 0   | 3                       | 0                       |                          |                          |                 |                     |         |         |
| 514 | IPI00604664 | NDUFS1      | NADH-ubiquinone oxidoreductase 75 kDa subunit, mitochondrial precursor               | Non-raft | 6         | 86/741            | 5                     | 3   | 0   | 2   | 5                       | 5                       | 5                        | 5                        | 1.00            | 0.000               | 0.799   |         |
| 515 | IPI00010346 | NLN         | Neurolysin, mitochondrial precursor                                                  | Non-raft | 2         | 21/704            | 1                     | 1   | 1   | 1   | 2                       | 2                       | 2                        | 2                        | 1.00            | 0.000               | 0.799   |         |
| 516 | IPI00012048 | NME1        | Nucleoside diphosphate kinase A                                                      | Non-raft | 2         | 21/152            | 2                     | 0   | 2   | 0   | 4                       | 0                       | 4                        | 0                        | 4.00            | 1.386               | 0.165   |         |
| 517 | IPI00218830 | NMT1        | Isoform Short of Glycylpeptide N-tetradecanoyltransferase 1                          | Non-raft | 3         | 41/416            | 1                     | 2   | 0   | 0   | 1                       | 2                       | 1                        | 2                        | 0.50            | -0.693              | 0.959   |         |
| 518 | IPI00329352 | NOMO1       | Nodal modulator 1 precursor                                                          | Non-raft | 4         | 49/1222           | 2                     | 3   | 0   | 0   | 2                       | 3                       | 2                        | 3                        | 0.67            | -0.405              | 0.914   |         |
| 519 | IPI00304596 | NONO        | Non-POU domain-containing octamer-binding protein                                    | Non-raft | 3         | 43/471            | 3                     | 0   | 0   | 0   | 3                       | 0                       | 12                       | 3                        | 4.00            | 1.386               | 0.165   | M       |
|     | IPI00304596 | NONO        | Non-POU domain-containing octamer-binding protein                                    | Raft     | 8         | 89/471            | 9                     | 3   | 0   | 0   | 9                       | 3                       |                          |                          |                 |                     |         |         |
| 520 | IPI00017672 | NP          | CDNA FLJ25678 fis, clone TST04067, highly similar to PURINE NUCLEOSIDE PHOSPHORYLASE | Non-raft | 2         | 31/293            | 2                     | 0   | 0   | 0   | 2                       | 0                       | 2                        | 0                        | 2.00            | 0.693               | 0.473   |         |
| 521 | IPI00005107 | NPC1        | Niemann-Pick C1 protein precursor                                                    | Non-raft | 17        | 260/1278          | 21                    | 5   | 16  | 6   | 37                      | 11                      | 37                       | 11                       | 3.36            | 1.213               | 0.228   |         |
| 522 | IPI00026216 | NPEPPS      | Puromycin-sensitive aminopeptidase                                                   | Non-raft | 2         | 25/919            | 1                     | 0   | 1   | 0   | 2                       | 0                       | 2                        | 0                        | 2.00            | 0.693               | 0.473   |         |
| 523 | IPI00001676 | NPLOC4      | Isoform 2 of Nuclear protein localization protein 4 homolog                          | Non-raft | 7         | 94/617            | 7                     | 3   | 1   | 2   | 8                       | 5                       | 8                        | 5                        | 1.60            | 0.470               | 0.589   |         |
| 524 | IPI00220740 | NPM1        | Isoform 2 of Nucleophosmin                                                           | Non-raft | 2         | 36/265            | 1                     | 0   | 1   | 0   | 2                       | 0                       | 22                       | 8                        | 2.75            | 1.012               | 0.315   |         |
|     | IPI00220740 | NPM1        | Isoform 2 of Nucleophosmin                                                           | Raft     | 7         | 88/265            | 13                    | 8   | 7   | 0   | 20                      | 8                       |                          |                          |                 |                     |         |         |
| 525 | IPI00012069 | NQO1        | NAD(P)H dehydrogenase [quinone] 1                                                    | Non-raft | 5         | 60/274            | 5                     | 1   | 2   | 0   | 7                       | 1                       | 7                        | 1                        | 7.00            | 1.946               | 0.044   |         |
| 526 | IPI00000005 | NRAS        | GTPase NRas precursor                                                                | Non-raft | 12        | 123/189           | 14                    | 0   | 15  | 1   | 29                      | 1                       | 31                       | 1                        | 31.00           | 3.434               | 0.000   |         |
|     | IPI00000005 | NRAS        | GTPase NRas precursor                                                                | Raft     | 2         | 21/189            | 1                     | 0   | 1   | 0   | 2                       | 0                       |                          |                          |                 |                     |         |         |
| 527 | IPI00299594 | NRP1        | Isoform 1 of Neuropilin-1 precursor                                                  | Non-raft | 7         | 114/923           | 4                     | 0   | 8   | 0   | 12                      | 0                       | 25                       | 0                        | 25.00           | 3.219               | 0.000   |         |
|     | IPI00299594 | NRP1        | Isoform 1 of Neuropilin-1 precursor                                                  | Raft     | 10        | 188/923           | 9                     | 0   | 4   | 0   | 13                      | 0                       |                          |                          |                 |                     |         |         |
| 528 | IPI00017231 | NRSN2       | Protein C2orf98                                                                      | Non-raft | 7         | 94/204            | 5                     | 0   | 3   | 0   | 8                       | 0                       | 8                        | 0                        | 8.00            | 2.079               | 0.030   |         |
| 529 | IPI00006451 | NSF         | Vesicle-fusing ATPase                                                                | Non-raft | 3         | 35/744            | 1                     | 3   | 1   | 0   | 2                       | 3                       | 2                        | 3                        | 0.67            | -0.405              | 0.914   |         |
| 530 | IPI00306369 | NSUN2       | NOL1/NOP2/Sun domain family 2 protein                                                | Non-raft | 6         | 71/767            | 4                     | 3   | 2   | 1   | 6                       | 4                       | 6                        | 4                        | 1.50            | 0.405               | 0.621   |         |
| 531 | IPI00009456 | NT5E        | 5'-nucleotidase precursor                                                            | Non-raft | 4         | 81/574            | 2                     | 2   | 2   | 0   | 4                       | 2                       | 17                       | 7                        | 2.43            | 0.887               |         |         |
|     | IPI00009456 | NT5E        | 5'-nucleotidase precursor                                                            | Raft     | 8         | 121/574           | 8                     | 3   | 5   | 2   | 13                      | 5                       |                          |                          |                 |                     |         |         |
| 532 | IPI00171664 | NUP43       | Nucleoporin 43kDa                                                                    | Raft     | 2         | 23/441            | 2                     | 1   | 0   | 0   | 2                       | 1                       | 2                        | 1                        | 2.00            | 0.693               | 0.473   |         |
| 533 | IPI00022334 | OAT         | Ornithine aminotransferase, mitochondrial precursor                                  | Non-raft | 5         | 82/439            | 4                     | 3   | 0   | 0   | 4                       | 3                       | 4                        | 3                        | 1.33            | 0.288               | 0.678   |         |



| No. | Acc.Number  | Gene Symbol | Description                                                                              | Fraction | Uni. Pep. | Sequence Coverage | Biological Replicates |     |     |     | Total EXP Each Fraction | Total CON Each Fraction | Total EXP Both Fractions | Total CON Both Fractions | EXP/CON Imputed | Ln(EXP/CON imputed) | P-value | 17-ODYA |
|-----|-------------|-------------|------------------------------------------------------------------------------------------|----------|-----------|-------------------|-----------------------|-----|-----|-----|-------------------------|-------------------------|--------------------------|--------------------------|-----------------|---------------------|---------|---------|
|     |             |             |                                                                                          |          |           |                   | 1st                   |     | 2nd |     |                         |                         |                          |                          |                 |                     |         |         |
|     |             |             |                                                                                          |          |           |                   | EXP                   | CON | EXP | CON |                         |                         |                          |                          |                 |                     |         |         |
| 534 | IPI00098902 | OGDH        | oxoglutarate (alpha-ketoglutarate) dehydrogenase (lipoamide) isoform 1 precursor         | Non-raft | 3         | 36/1023           | 3                     | 1   | 0   | 0   | 3                       | 1                       | 3                        | 1                        | 3.00            | 1.099               | 0.275   |         |
| 535 | IPI00022674 | OSMR        | oncostatin M receptor                                                                    | Non-raft | 9         | 128/979           | 6                     | 0   | 7   | 1   | 13                      | 1                       | 17                       | 1                        | 17.00           | 2.833               | 0.002   |         |
|     | IPI00022674 | OSMR        | oncostatin M receptor                                                                    | Raft     | 4         | 61/979            | 3                     | 0   | 1   | 0   | 4                       | 0                       |                          |                          |                 |                     |         |         |
| 536 | IPI00026516 | OXCT1       | Succinyl-CoA:3-ketoacid-coenzyme A transferase 1, mitochondrial precursor                | Non-raft | 2         | 32/520            | 1                     | 1   | 1   | 0   | 2                       | 1                       | 2                        | 1                        | 2.00            | 0.693               | 0.473   |         |
| 537 | IPI00010796 | P4HB        | Protein disulfide-isomerase precursor                                                    | Non-raft | 19        | 241/508           | 22                    | 9   | 11  | 7   | 33                      | 16                      | 33                       | 16                       | 2.06            | 0.724               | 0.457   |         |
| 538 | IPI00299000 | PA2G4       | Proliferation-associated protein 2G4                                                     | Raft     | 9         | 104/394           | 8                     | 7   | 1   | 0   | 9                       | 7                       | 9                        | 7                        | 1.29            | 0.251               | 0.695   |         |
| 539 | IPI00008524 | PABPC1      | Isoform 1 of Polyadenylate-binding protein 1                                             | Non-raft | 5         | 70/636            | 2                     | 0   | 4   | 1   | 6                       | 1                       | 34                       | 25                       | 1.36            | 0.307               | 0.669   |         |
|     | IPI00008524 | PABPC1      | Isoform 1 of Polyadenylate-binding protein 1                                             | Raft     | 17        | 207/636           | 19                    | 16  | 9   | 8   | 28                      | 24                      |                          |                          |                 |                     |         |         |
| 540 | IPI00012726 | PABPC4      | Isoform 1 of Polyadenylate-binding protein 4                                             | Raft     | 14        | 179/644           | 11                    | 10  | 7   | 6   | 18                      | 16                      | 18                       | 16                       | 1.13            | 0.118               | 0.753   |         |
| 541 | IPI00329572 | PACSIN3     | 49 kDa protein                                                                           | Non-raft | 5         | 67/424            | 5                     | 0   | 3   | 0   | 8                       | 0                       | 27                       | 0                        | 27.00           | 3.296               | 0.000   |         |
|     | IPI00329572 | PACSIN3     | 49 kDa protein                                                                           | Raft     | 10        | 122/424           | 11                    | 0   | 8   | 0   | 19                      | 0                       |                          |                          |                 |                     |         |         |
| 542 | IPI00020464 | PAG1        | Phosphoprotein associated with glycosphingolipid-enriched microdomains 1                 | Raft     | 3         | 60/432            | 2                     | 0   | 2   | 0   | 4                       | 0                       | 4                        | 0                        | 4.00            | 1.386               | 0.165   |         |
| 543 | IPI00217223 | PAICS       | Multifunctional protein ADE2                                                             | Non-raft | 4         | 49/451            | 3                     | 3   | 0   | 2   | 3                       | 5                       | 3                        | 5                        | 0.60            | -0.511              | 0.934   |         |
| 544 | IPI00301023 | PALM        | Isoform 1 of Paralemmin                                                                  | Non-raft | 4         | 43/387            | 4                     | 0   | 2   | 0   | 6                       | 0                       | 9                        | 0                        | 9.00            | 2.197               | 0.021   |         |
|     | IPI00301023 | PALM        | Isoform 1 of Paralemmin                                                                  | Raft     | 3         | 33/387            | 2                     | 0   | 1   | 0   | 3                       | 0                       |                          |                          |                 |                     |         |         |
| 545 | IPI00073769 | PALM2       | A kinase                                                                                 | Non-raft | 3         | 34/433            | 3                     | 0   | 0   | 0   | 3                       | 0                       | 7                        | 0                        | 7.00            | 1.946               | 0.044   |         |
|     | IPI00073769 | PALM2       | A kinase                                                                                 | Raft     | 4         | 49/433            | 4                     | 0   | 0   | 0   | 4                       | 0                       |                          |                          |                 |                     |         |         |
| 546 | IPI00449049 | PARP1       | Poly [ADP-ribose] polymerase 1                                                           | Raft     | 4         | 56/1014           | 3                     | 2   | 0   | 0   | 3                       | 2                       | 3                        | 2                        | 1.50            | 0.405               | 0.621   |         |
| 547 | IPI00018873 | PBEF1       | Isoform 1 of Nicotinamide phosphoribosyltransferase                                      | Non-raft | 2         | 35/491            | 2                     | 0   | 0   | 0   | 2                       | 0                       | 2                        | 0                        | 2.00            | 0.693               | 0.473   |         |
| 548 | IPI00016610 | PCBP1       | Poly(rC)-binding protein 1                                                               | Non-raft | 6         | 88/356            | 3                     | 6   | 0   | 1   | 3                       | 7                       | 16                       | 15                       | 1.07            | 0.065               | 0.775   |         |
|     | IPI00016610 | PCBP1       | Poly(rC)-binding protein 1                                                               | Raft     | 10        | 152/356           | 10                    | 7   | 3   | 1   | 13                      | 8                       |                          |                          |                 |                     |         |         |
| 549 | IPI00012066 | PCBP2       | poly(rC)-binding protein 2 isoform b                                                     | Non-raft | 4         | 55/362            | 3                     | 3   | 0   | 0   | 3                       | 3                       | 3                        | 3                        | 1.00            | 0.000               | 0.799   |         |
| 550 | IPI00021700 | PCNA        | Proliferating cell nuclear antigen                                                       | Non-raft | 2         | 21/261            | 2                     | 0   | 0   | 1   | 2                       | 1                       | 2                        | 1                        | 2.00            | 0.693               | 0.473   |         |
| 551 | IPI00869136 | PCNXL3      | Isoform 1 of Pecanex-like protein 3                                                      | Raft     | 4         | 47/2034           | 4                     | 0   | 1   | 0   | 5                       | 0                       | 5                        | 0                        | 5.00            | 1.609               | 0.103   |         |
| 552 | IPI00306301 | PDHA1       | Pyruvate dehydrogenase E1 component alpha subunit, somatic form, mitochondrial precursor | Non-raft | 3         | 28/428            | 3                     | 0   | 0   | 0   | 3                       | 0                       | 3                        | 0                        | 3.00            | 1.099               | 0.275   |         |
| 553 | IPI00025252 | PDIA3       | Protein disulfide-isomerase A3 precursor                                                 | Non-raft | 21        | 197/505           | 19                    | 20  | 11  | 8   | 30                      | 28                      | 35                       | 30                       | 1.17            | 0.154               | 0.738   |         |
|     | IPI00025252 | PDIA3       | Protein disulfide-isomerase A3 precursor                                                 | Raft     | 6         | 72/505            | 5                     | 2   | 0   | 0   | 5                       | 2                       |                          |                          |                 |                     |         |         |
| 554 | IPI00009904 | PDIA4       | Protein disulfide-isomerase A4 precursor                                                 | Non-raft | 9         | 109/645           | 7                     | 4   | 1   | 1   | 8                       | 5                       | 8                        | 5                        | 1.60            | 0.470               | 0.589   |         |
| 555 | IPI00299571 | PDIA6       | CDNA FLJ45525 fis, clone BRTHA2026311, highly similar to Protein disulfide isomerase A6  | Non-raft | 11        | 153/492           | 14                    | 11  | 6   | 6   | 20                      | 17                      | 24                       | 18                       | 1.33            | 0.288               | 0.678   |         |
|     | IPI00299571 | PDIA6       | CDNA FLJ45525 fis, clone BRTHA2026311, highly similar to Protein disulfide isomerase A6  | Raft     | 4         | 67/492            | 4                     | 1   | 0   | 0   | 4                       | 1                       |                          |                          |                 |                     |         |         |
| 556 | IPI00023122 | PDLIM7      | Isoform 1 of PDZ and LIM domain protein 7                                                | Non-raft | 2         | 24/457            | 2                     | 1   | 0   | 0   | 2                       | 1                       | 2                        | 1                        | 2.00            | 0.693               | 0.473   |         |
| 557 | IPI00293189 | PERP        | Isoform 1 of p53 apoptosis effector related to PMP-22                                    | Raft     | 2         | 24/193            | 3                     | 0   | 0   | 0   | 3                       | 0                       | 3                        | 0                        | 3.00            | 1.099               | 0.275   |         |
| 558 | IPI00004534 | PFAS        | Phosphoribosylformylglycinamide synthase                                                 | Non-raft | 2         | 29/1338           | 1                     | 1   | 0   | 0   | 1                       | 1                       | 1                        | 1                        | 1.00            | 0.000               | 0.799   |         |
| 559 | IPI00009790 | PFKP        | 6-phosphofructokinase type C                                                             | Non-raft | 7         | 82/784            | 4                     | 4   | 0   | 0   | 4                       | 4                       | 4                        | 4                        | 1.00            | 0.000               | 0.799   | M       |
| 560 | IPI00216691 | PFN1        | Profilin-1                                                                               | Non-raft | 5         | 65/140            | 3                     | 5   | 3   | 1   | 6                       | 6                       | 6                        | 6                        | 1.00            | 0.000               | 0.799   |         |
| 561 | IPI00549725 | PGAM1       | Phosphoglycerate mutase 1                                                                | Non-raft | 4         | 48/254            | 4                     | 1   | 1   | 0   | 5                       | 1                       | 5                        | 1                        | 5.00            | 1.609               | 0.103   |         |
| 562 | IPI00219525 | PGD         | 6-phosphogluconate dehydrogenase, decarboxylating                                        | Non-raft | 3         | 42/483            | 1                     | 1   | 0   | 1   | 1                       | 2                       | 1                        | 2                        | 0.50            | -0.693              | 0.959   |         |
| 563 | IPI00169383 | PGK1        | Phosphoglycerate kinase 1                                                                | Non-raft | 4         | 56/417            | 6                     | 5   | 0   | 0   | 6                       | 5                       | 6                        | 5                        | 1.20            | 0.182               | 0.726   |         |
| 564 | IPI00017334 | PHB         | Prohibitin                                                                               | Non-raft | 4         | 46/272            | 4                     | 1   | 1   | 0   | 5                       | 1                       | 5                        | 1                        | 5.00            | 1.609               | 0.103   |         |
| 565 | IPI00011200 | PHGDH       | D-3-phosphoglycerate dehydrogenase                                                       | Non-raft | 7         | 94/533            | 5                     | 2   | 0   | 2   | 5                       | 4                       | 5                        | 4                        | 1.25            | 0.223               | 0.708   |         |
| 566 | IPI00020124 | PI4K2A      | Phosphatidylinositol 4-kinase type II                                                    | Non-raft | 25        | 333/479           | 31                    | 0   | 15  | 1   | 46                      | 1                       | 50                       | 1                        | 50.00           | 3.912               | 0.000   | H       |
|     | IPI00020124 | PI4K2A      | Phosphatidylinositol 4-kinase type II                                                    | Raft     | 4         | 36/479            | 3                     | 0   | 1   | 0   | 4                       | 0                       |                          |                          |                 |                     |         |         |

| No. | Acc.Number  | Gene Symbol | Description                                                                         | Fraction | Uni. Pep. | Sequence Coverage | Biological Replicates |     |     |     | Total EXP Each Fraction | Total CON Each Fraction | Total EXP Both Fractions | Total CON Both Fractions | EXP/CON Imputed | Ln(EXP/CON imputed) | P-value | 17-ODYA |
|-----|-------------|-------------|-------------------------------------------------------------------------------------|----------|-----------|-------------------|-----------------------|-----|-----|-----|-------------------------|-------------------------|--------------------------|--------------------------|-----------------|---------------------|---------|---------|
|     |             |             |                                                                                     |          |           |                   | 1st                   |     | 2nd |     |                         |                         |                          |                          |                 |                     |         |         |
|     |             |             |                                                                                     |          |           |                   | EXP                   | CON | EXP | CON |                         |                         |                          |                          |                 |                     |         |         |
| 567 | IPI00291068 | PI4K2B      | Phosphatidylinositol 4-kinase type-II beta                                          | Non-raft | 5         | 57/481            | 4                     | 0   | 3   | 0   | 7                       | 0                       | 7                        | 0                        | 7.00            | 1.946               | 0.044   | H       |
| 568 | IPI00022543 | PIGK        | GPI-anchor transamidase precursor                                                   | Non-raft | 2         | 23/395            | 0                     | 2   | 0   | 0   | 0                       | 2                       | 0                        | 2                        | 0.50            | -0.693              | 0.959   |         |
| 569 | IPI00479186 | PKM2        | pyruvate kinase 3 isoform 1                                                         | Non-raft | 31        | 371/605           | 56                    | 36  | 35  | 15  | 91                      | 51                      | 91                       | 51                       | 1.78            | 0.579               | 0.533   |         |
| 570 | IPI00021076 | PKP4        | Isoform Long of Plakophilin-4                                                       | Non-raft | 2         | 20/1211           | 2                     | 0   | 0   | 0   | 2                       | 0                       | 2                        | 0                        | 2.00            | 0.693               | 0.473   |         |
| 571 | IPI00010400 | PLCB3       | 1-phosphatidylinositol-4,5-bisphosphate phosphodiesterase beta 3                    | Raft     | 2         | 12/1234           | 0                     | 2   | 0   | 0   | 0                       | 2                       | 0                        | 2                        | 0.50            | -0.693              | 0.959   |         |
| 572 | IPI00152701 | PLCD3       | phospholipase C delta 3                                                             | Non-raft | 3         | 52/789            | 2                     | 0   | 1   | 0   | 3                       | 0                       | 3                        | 0                        | 3.00            | 1.099               | 0.275   |         |
| 573 | IPI00012865 | PLD1        | Isoform PLD1A of Phospholipase D1                                                   | Raft     | 2         | 29/1074           | 1                     | 0   | 1   | 0   | 2                       | 0                       | 2                        | 0                        | 2.00            | 0.693               | 0.473   |         |
| 574 | IPI00337495 | PLOD2       | Isoform 2 of Procollagen-lysine,2-oxoglutarate 5-dioxygenase 2 precursor            | Non-raft | 9         | 135/758           | 3                     | 5   | 2   | 2   | 5                       | 7                       | 5                        | 7                        | 0.71            | -0.336              | 0.899   |         |
| 575 | IPI00030255 | PLOD3       | Procollagen-lysine,2-oxoglutarate 5-dioxygenase 3 precursor                         | Non-raft | 2         | 23/738            | 1                     | 1   | 0   | 0   | 1                       | 1                       | 4                        | 3                        | 1.33            | 0.288               | 0.678   |         |
|     | IPI00030255 | PLOD3       | Procollagen-lysine,2-oxoglutarate 5-dioxygenase 3 precursor                         | Raft     | 3         | 42/738            | 3                     | 2   | 0   | 0   | 3                       | 2                       |                          |                          |                 |                     |         |         |
| 576 | IPI00030362 | PLP2        | Proteolipid protein 2                                                               | Non-raft | 2         | 28/152            | 2                     | 0   | 1   | 0   | 3                       | 0                       | 3                        | 0                        | 3.00            | 1.099               | 0.275   |         |
| 577 | IPI00216694 | PLS3        | plastin 3                                                                           | Non-raft | 7         | 82/630            | 6                     | 3   | 1   | 3   | 7                       | 6                       | 7                        | 6                        | 1.17            | 0.154               | 0.738   |         |
| 578 | IPI00005181 | PLSCR1      | Phospholipid scramblase 1                                                           | Non-raft | 6         | 70/318            | 12                    | 0   | 8   | 1   | 20                      | 1                       | 27                       | 1                        | 27.00           | 3.296               | 0.000   |         |
|     | IPI00005181 | PLSCR1      | Phospholipid scramblase 1                                                           | Raft     | 4         | 60/318            | 5                     | 0   | 2   | 0   | 7                       | 0                       |                          |                          |                 |                     |         |         |
| 579 | IPI00216127 | PLSCR3      | Phospholipid scramblase 3                                                           | Non-raft | 4         | 54/295            | 7                     | 0   | 4   | 0   | 11                      | 0                       | 11                       | 0                        | 11.00           | 2.398               | 0.011   |         |
| 580 | IPI00398435 | PLXNB2      | PLEXIN-B2                                                                           | Non-raft | 16        | 243/1266          | 10                    | 6   | 4   | 0   | 14                      | 6                       | 14                       | 6                        | 2.33            | 0.847               | 0.394   |         |
| 581 | IPI00165506 | POLDIP2     | Polymerase delta-interacting protein 2                                              | Non-raft | 2         | 28/368            | 1                     | 0   | 1   | 0   | 2                       | 0                       | 2                        | 0                        | 2.00            | 0.693               | 0.473   |         |
| 582 | IPI00031960 | POLR1A      | polymerase (RNA) I polypeptide A, 194kDa                                            | Raft     | 2         | 34/1720           | 1                     | 1   | 0   | 0   | 1                       | 1                       | 1                        | 1                        | 1.00            | 0.000               | 0.799   |         |
| 583 | IPI00470467 | POR         | NADPH--cytochrome P450 reductase                                                    | Non-raft | 6         | 95/677            | 3                     | 1   | 3   | 2   | 6                       | 3                       | 6                        | 3                        | 2.00            | 0.693               | 0.473   |         |
| 584 | IPI00015018 | PPA1        | Inorganic pyrophosphatase                                                           | Non-raft | 2         | 38/289            | 2                     | 1   | 0   | 0   | 2                       | 1                       | 2                        | 1                        | 2.00            | 0.693               | 0.473   |         |
| 585 | IPI00419585 | PPIA        | Peptidyl-prolyl cis-trans isomerase A                                               | Non-raft | 9         | 135/165           | 9                     | 3   | 8   | 1   | 17                      | 4                       | 26                       | 7                        | 3.71            | 1.312               | 0.191   |         |
|     | IPI00419585 | PPIA        | Peptidyl-prolyl cis-trans isomerase A                                               | Raft     | 8         | 122/165           | 7                     | 3   | 2   | 0   | 9                       | 3                       |                          |                          |                 |                     |         |         |
| 586 | IPI00646304 | PPIB        | peptidylprolyl isomerase B precursor                                                | Non-raft | 3         | 35/216            | 1                     | 2   | 2   | 1   | 3                       | 3                       | 5                        | 3                        | 1.67            | 0.511               | 0.568   |         |
|     | IPI00646304 | PPIB        | peptidylprolyl isomerase B precursor                                                | Raft     | 2         | 27/216            | 2                     | 0   | 0   | 0   | 2                       | 0                       |                          |                          |                 |                     |         |         |
| 587 | IPI00550451 | PPP1CA      | Serine/threonine-protein phosphatase PP1-alpha catalytic subunit                    | Non-raft | 9         | 115/330           | 5                     | 4   | 3   | 1   | 8                       | 5                       | 19                       | 10                       | 1.90            | 0.642               | 0.500   |         |
|     | IPI00550451 | PPP1CA      | Serine/threonine-protein phosphatase PP1-alpha catalytic subunit                    | Raft     | 11        | 130/330           | 7                     | 4   | 4   | 1   | 11                      | 5                       |                          |                          |                 |                     |         |         |
| 588 | IPI00218236 | PPP1CB      | Serine/threonine-protein phosphatase PP1-beta catalytic subunit                     | Non-raft | 7         | 99/327            | 5                     | 3   | 0   | 0   | 5                       | 3                       | 10                       | 6                        | 1.67            | 0.511               | 0.568   |         |
|     | IPI00218236 | PPP1CB      | Serine/threonine-protein phosphatase PP1-beta catalytic subunit                     | Raft     | 7         | 93/327            | 5                     | 3   | 0   | 0   | 5                       | 3                       |                          |                          |                 |                     |         |         |
| 589 | IPI00005705 | PPP1CC      | Isoform Gamma-1 of Serine/threonine-protein phosphatase PP1-gamma catalytic subunit | Non-raft | 7         | 103/323           | 4                     | 3   | 2   | 1   | 6                       | 4                       | 16                       | 7                        | 2.29            | 0.827               | 0.405   |         |
|     | IPI00005705 | PPP1CC      | Isoform Gamma-1 of Serine/threonine-protein phosphatase PP1-gamma catalytic subunit | Raft     | 8         | 100/323           | 5                     | 3   | 5   | 0   | 10                      | 3                       |                          |                          |                 |                     |         |         |
| 590 | IPI00063273 | PPP1R16A    | Protein phosphatase 1 regulatory subunit 16A                                        | Non-raft | 2         | 27/528            | 2                     | 0   | 0   | 0   | 2                       | 0                       | 2                        | 0                        | 2.00            | 0.693               | 0.473   |         |
| 591 | IPI00008380 | PPP2CA      | Serine/threonine-protein phosphatase 2A catalytic subunit alpha isoform             | Non-raft | 2         | 19/309            | 1                     | 1   | 0   | 0   | 1                       | 1                       | 2                        | 3                        | 0.67            | -0.405              | 0.914   |         |
|     | IPI00008380 | PPP2CA      | Serine/threonine-protein phosphatase 2A catalytic subunit alpha isoform             | Raft     | 3         | 51/309            | 1                     | 2   | 0   | 0   | 1                       | 2                       |                          |                          |                 |                     |         |         |
| 592 | IPI00419307 | PPP2R1A     | alpha isoform of regulatory subunit A, protein phosphatase 2                        | Non-raft | 5         | 63/589            | 2                     | 1   | 2   | 1   | 4                       | 2                       | 4                        | 2                        | 2.00            | 0.693               | 0.473   |         |
| 593 | IPI00026994 | PRAF2       | PRA1 family protein 2                                                               | Non-raft | 2         | 29/178            | 1                     | 0   | 1   | 0   | 2                       | 0                       | 2                        | 0                        | 2.00            | 0.693               | 0.473   | H       |
| 594 | IPI00000874 | PRDX1       | Peroxiredoxin-1                                                                     | Non-raft | 7         | 66/199            | 3                     | 1   | 3   | 2   | 6                       | 3                       | 19                       | 7                        | 2.71            | 0.999               | 0.321   |         |
|     | IPI00000874 | PRDX1       | Peroxiredoxin-1                                                                     | Raft     | 8         | 98/199            | 8                     | 4   | 5   | 0   | 13                      | 4                       |                          |                          |                 |                     |         |         |
| 595 | IPI00027350 | PRDX2       | Peroxiredoxin-2                                                                     | Non-raft | 3         | 36/198            | 3                     | 1   | 0   | 0   | 3                       | 1                       | 4                        | 3                        | 1.33            | 0.288               | 0.678   |         |
|     | IPI00027350 | PRDX2       | Peroxiredoxin-2                                                                     | Raft     | 2         | 24/198            | 1                     | 2   | 0   | 0   | 1                       | 2                       |                          |                          |                 |                     |         |         |

| No. | Acc.Number  | Gene Symbol | Description                                                               | Fraction | Uni. Pep. | Sequence Coverage | Biological Replicates |     |     |     | Total EXP Each Fraction | Total CON Each Fraction | Total EXP Both Fractions | Total CON Both Fractions | EXP/CON Imputed | Ln(EXP/CON imputed) | P-value | 17-ODYA |
|-----|-------------|-------------|---------------------------------------------------------------------------|----------|-----------|-------------------|-----------------------|-----|-----|-----|-------------------------|-------------------------|--------------------------|--------------------------|-----------------|---------------------|---------|---------|
|     |             |             |                                                                           |          |           |                   | 1st                   |     | 2nd |     |                         |                         |                          |                          |                 |                     |         |         |
|     |             |             |                                                                           |          |           |                   | EXP                   | CON | EXP | CON |                         |                         |                          |                          |                 |                     |         |         |
| 596 | IPI00024919 | PRDX3       | Thioredoxin-dependent peroxide reductase, mitochondrial precursor         | Non-raft | 3         | 37/256            | 2                     | 3   | 3   | 2   | 5                       | 5                       | 8                        | 7                        | 1.14            | 0.134               | 0.747   |         |
|     | IPI00024919 | PRDX3       | Thioredoxin-dependent peroxide reductase, mitochondrial precursor         | Raft     | 3         | 25/256            | 2                     | 2   | 1   | 0   | 3                       | 2                       |                          |                          |                 |                     |         |         |
| 597 | IPI00011937 | PRDX4       | Peroxiredoxin-4                                                           | Non-raft | 2         | 23/271            | 3                     | 2   | 0   | 0   | 3                       | 2                       | 3                        | 2                        | 1.50            | 0.405               | 0.621   |         |
| 598 | IPI00385449 | PRKCA       | Protein kinase C alpha type                                               | Non-raft | 3         | 35/672            | 2                     | 1   | 0   | 0   | 2                       | 1                       | 2                        | 1                        | 2.00            | 0.693               | 0.473   |         |
| 599 | IPI00026154 | PRKCSH      | Glucosidase 2 subunit beta precursor                                      | Non-raft | 9         | 88/535            | 6                     | 10  | 3   | 4   | 9                       | 14                      | 9                        | 14                       | 0.64            | -0.442              | 0.922   | H       |
| 600 | IPI00296337 | PRKDC       | Isoform 1 of DNA-dependent protein kinase catalytic subunit               | Non-raft | 8         | 108/4128          | 1                     | 8   | 0   | 0   | 1                       | 8                       | 1                        | 8                        | 0.13            | -2.079              | 1.000   | H       |
| 601 | IPI00009276 | PROCR       | Endothelial protein C receptor precursor                                  | Non-raft | 6         | 71/275            | 8                     | 0   | 1   | 0   | 9                       | 0                       | 12                       | 0                        | 12.00           | 2.485               | 0.008   |         |
|     | IPI00009276 | PROCR       | Endothelial protein C receptor precursor                                  | Raft     | 2         | 30/275            | 1                     | 0   | 2   | 0   | 3                       | 0                       |                          |                          |                 |                     |         |         |
| 602 | IPI00294004 | PROS1       | Vitamin K-dependent protein S precursor                                   | Non-raft | 2         | 19/676            | 1                     | 1   | 0   | 0   | 1                       | 1                       | 1                        | 1                        | 1.00            | 0.000               | 0.799   |         |
| 603 | IPI00004968 | PRPF19      | Pre-mRNA-processing factor 19                                             | Non-raft | 4         | 57/504            | 3                     | 1   | 1   | 0   | 4                       | 1                       | 13                       | 4                        | 3.25            | 1.179               | 0.242   | M       |
|     | IPI00004968 | PRPF19      | Pre-mRNA-processing factor 19                                             | Raft     | 9         | 174/504           | 6                     | 2   | 3   | 1   | 9                       | 3                       |                          |                          |                 |                     |         |         |
| 604 | IPI00150269 | PRPF4       | Isoform 1 of U4/U6 small nuclear ribonucleoprotein Prp4                   | Non-raft | 2         | 23/522            | 1                     | 0   | 1   | 1   | 2                       | 1                       | 3                        | 3                        | 1.00            | 0.000               | 0.799   |         |
|     | IPI00150269 | PRPF4       | Isoform 1 of U4/U6 small nuclear ribonucleoprotein Prp4                   | Raft     | 3         | 39/522            | 1                     | 2   | 0   | 0   | 1                       | 2                       |                          |                          |                 |                     |         |         |
| 605 | IPI00028077 | PSEN1       | Isoform 1 of Presenilin-1                                                 | Non-raft | 5         | 63/467            | 8                     | 0   | 4   | 0   | 12                      | 0                       | 14                       | 0                        | 14.00           | 2.639               | 0.005   | M       |
|     | IPI00028077 | PSEN1       | Isoform 1 of Presenilin-1                                                 | Raft     | 2         | 35/467            | 2                     | 0   | 0   | 0   | 2                       | 0                       |                          |                          |                 |                     |         |         |
| 606 | IPI00171199 | PSMA3       | proteasome alpha 3 subunit isoform 2                                      | Non-raft | 2         | 21/248            | 1                     | 1   | 0   | 0   | 1                       | 1                       | 1                        | 1                        | 1.00            | 0.000               | 0.799   |         |
| 607 | IPI00029623 | PSMA6       | Proteasome subunit alpha type 6                                           | Non-raft | 2         | 24/246            | 2                     | 1   | 1   | 0   | 3                       | 1                       | 3                        | 1                        | 3.00            | 1.099               | 0.275   |         |
| 608 | IPI00375704 | PSMB5       | Hypothetical protein DKFZp68610180 (Fragment)                             | Non-raft | 3         | 35/263            | 1                     | 2   | 1   | 0   | 2                       | 2                       | 2                        | 2                        | 1.00            | 0.000               | 0.799   |         |
| 609 | IPI00012268 | PSMD2       | 26S proteasome non-ATPase regulatory subunit 2                            | Non-raft | 2         | 29/908            | 1                     | 1   | 0   | 0   | 1                       | 1                       | 1                        | 1                        | 1.00            | 0.000               | 0.799   | M       |
| 610 | IPI00030770 | PSMG1       | Isoform 1 of Down syndrome critical region protein 2                      | Non-raft | 2         | 14/288            | 2                     | 0   | 0   | 0   | 2                       | 0                       | 2                        | 0                        | 2.00            | 0.693               | 0.473   |         |
| 611 | IPI00103525 | PSPC1       | paraspeckle protein 1 isoform alpha                                       | Raft     | 3         | 47/523            | 2                     | 0   | 1   | 0   | 3                       | 0                       | 3                        | 0                        | 3.00            | 1.099               | 0.275   |         |
| 612 | IPI00179964 | PTBP1       | Isoform 1 of Polypyrimidine tract-binding protein 1                       | Non-raft | 7         | 99/531            | 5                     | 0   | 4   | 1   | 9                       | 1                       | 21                       | 8                        | 2.63            | 0.965               | 0.336   | H       |
|     | IPI00179964 | PTBP1       | Isoform 1 of Polypyrimidine tract-binding protein 1                       | Raft     | 11        | 197/531           | 7                     | 6   | 5   | 1   | 12                      | 7                       |                          |                          |                 |                     |         |         |
| 613 | IPI00022048 | PTGFRN      | Prostaglandin F2 receptor negative regulator precursor                    | Non-raft | 15        | 201/879           | 14                    | 0   | 6   | 0   | 20                      | 0                       | 23                       | 0                        | 23.00           | 3.135               | 0.001   |         |
|     | IPI00022048 | PTGFRN      | Prostaglandin F2 receptor negative regulator precursor                    | Raft     | 3         | 31/879            | 3                     | 0   | 0   | 0   | 3                       | 0                       |                          |                          |                 |                     |         |         |
| 614 | IPI00168812 | PTK7        | PTK7 protein tyrosine kinase 7 isoform d precursor                        | Non-raft | 8         | 124/1014          | 8                     | 0   | 3   | 0   | 11                      | 0                       | 11                       | 0                        | 11.00           | 2.398               | 0.011   | M       |
| 615 | IPI00008998 | PTPLAD1     | HSPC121                                                                   | Non-raft | 4         | 51/362            | 3                     | 2   | 1   | 0   | 4                       | 2                       | 4                        | 2                        | 2.00            | 0.693               | 0.473   |         |
| 616 | IPI00297261 | PTPN1       | Tyrosine-protein phosphatase non-receptor type 1                          | Non-raft | 3         | 35/435            | 4                     | 5   | 3   | 2   | 7                       | 7                       | 7                        | 7                        | 1.00            | 0.000               | 0.799   |         |
| 617 | IPI00298347 | PTPN11      | Isoform 2 of Tyrosine-protein phosphatase non-receptor type 11            | Non-raft | 2         | 23/593            | 2                     | 0   | 0   | 0   | 2                       | 0                       | 2                        | 0                        | 2.00            | 0.693               | 0.473   |         |
| 618 | IPI00107831 | PTPRF       | Receptor-type tyrosine-protein phosphatase F precursor                    | Non-raft | 7         | 104/1897          | 7                     | 1   | 0   | 0   | 7                       | 1                       | 7                        | 1                        | 7.00            | 1.946               | 0.044   |         |
| 619 | IPI00011651 | PTPRG       | Receptor-type tyrosine-protein phosphatase gamma precursor                | Non-raft | 3         | 50/1445           | 2                     | 0   | 1   | 0   | 3                       | 0                       | 3                        | 0                        | 3.00            | 1.099               | 0.275   |         |
| 620 | IPI00032903 | PTRH2       | Peptidyl-rRNA hydrolase 2, mitochondrial precursor                        | Non-raft | 7         | 100/179           | 5                     | 0   | 5   | 0   | 10                      | 0                       | 10                       | 0                        | 10.00           | 2.303               | 0.015   | H       |
| 621 | IPI00023974 | PTTG1IP     | Pituitary tumor-transforming gene 1 protein-interacting protein precursor | Non-raft | 3         | 41/180            | 5                     | 0   | 2   | 0   | 7                       | 0                       | 10                       | 0                        | 10.00           | 2.303               | 0.015   | H       |
|     | IPI00023974 | PTTG1IP     | Pituitary tumor-transforming gene 1 protein-interacting protein precursor | Raft     | 2         | 30/180            | 3                     | 0   | 0   | 0   | 3                       | 0                       |                          |                          |                 |                     |         |         |
| 622 | IPI00023591 | PURA        | Transcriptional activator protein Pur-alpha                               | Raft     | 2         | 35/322            | 2                     | 1   | 0   | 0   | 2                       | 1                       | 2                        | 1                        | 2.00            | 0.693               | 0.473   |         |
| 623 | IPI00219425 | PVR         | Isoform Beta of Poliovirus receptor precursor                             | Non-raft | 9         | 86/372            | 17                    | 3   | 21  | 0   | 38                      | 3                       | 40                       | 3                        | 13.33           | 2.590               | 0.005   |         |
|     | IPI00219425 | PVR         | Isoform Beta of Poliovirus receptor precursor                             | Raft     | 2         | 25/372            | 1                     | 0   | 1   | 0   | 2                       | 0                       |                          |                          |                 |                     |         |         |
| 624 | IPI00022661 | PVRL2       | Isoform Delta of Poliovirus receptor-related protein 2 precursor          | Non-raft | 7         | 92/538            | 7                     | 0   | 3   | 0   | 10                      | 0                       | 10                       | 0                        | 10.00           | 2.303               | 0.015   |         |
| 625 | IPI00026665 | QARS        | Glutaminyl-tRNA synthetase                                                | Non-raft | 2         | 20/793            | 1                     | 1   | 0   | 0   | 1                       | 1                       | 4                        | 2                        | 2.00            | 0.693               | 0.473   |         |
|     | IPI00026665 | QARS        | Glutaminyl-tRNA synthetase                                                | Raft     | 3         | 29/793            | 3                     | 1   | 0   | 0   | 3                       | 1                       |                          |                          |                 |                     |         |         |
| 626 | IPI00016513 | RAB10       | Ras-related protein Rab-10                                                | Non-raft | 6         | 48/200            | 9                     | 3   | 11  | 3   | 20                      | 6                       | 20                       | 6                        | 3.33            | 1.204               | 0.231   |         |
| 627 | IPI00016373 | RAB13       | Ras-related protein Rab-13                                                | Non-raft | 8         | 90/203            | 11                    | 5   | 4   | 1   | 15                      | 6                       | 15                       | 6                        | 2.50            | 0.916               | 0.360   |         |
| 628 | IPI00291928 | RAB14       | Ras-related protein Rab-14                                                | Non-raft | 8         | 97/215            | 9                     | 2   | 6   | 1   | 15                      | 3                       | 15                       | 3                        | 5.00            | 1.609               | 0.103   |         |
| 629 | IPI00005719 | RAB1A       | RAB1A, member RAS oncogene family                                         | Non-raft | 11        | 111/205           | 13                    | 1   | 9   | 2   | 22                      | 3                       | 22                       | 3                        | 7.33            | 1.992               | 0.039   |         |

| No. | Acc.Number  | Gene Symbol | Description                                                       | Fraction | Uni. Pep. | Sequence Coverage | Biological Replicates |     |     |     | Total EXP Each Fraction | Total CON Each Fraction | Total EXP Both Fractions | Total CON Both Fractions | EXP/CON Imputed | Ln(EXP/CON imputed) | P-value | 17-ODYA |
|-----|-------------|-------------|-------------------------------------------------------------------|----------|-----------|-------------------|-----------------------|-----|-----|-----|-------------------------|-------------------------|--------------------------|--------------------------|-----------------|---------------------|---------|---------|
|     |             |             |                                                                   |          |           |                   | 1st                   |     | 2nd |     |                         |                         |                          |                          |                 |                     |         |         |
|     |             |             |                                                                   |          |           |                   | EXP                   | CON | EXP | CON |                         |                         |                          |                          |                 |                     |         |         |
| 630 | IPI00008964 | RAB1B       | Ras-related protein Rab-1B                                        | Non-raft | 10        | 121/201           | 12                    | 3   | 11  | 3   | 23                      | 6                       | 23                       | 6                        | 3.83            | 1.344               | 0.180   | H       |
| 631 | IPI00007755 | RAB21       | Ras-related protein Rab-21                                        | Non-raft | 7         | 88/225            | 7                     | 3   | 1   | 0   | 8                       | 3                       | 8                        | 3                        | 2.67            | 0.981               | 0.329   |         |
| 632 | IPI00031169 | RAB2A       | Ras-related protein Rab-2A                                        | Non-raft | 5         | 57/212            | 4                     | 2   | 3   | 2   | 7                       | 4                       | 7                        | 4                        | 1.75            | 0.560               | 0.543   |         |
| 633 | IPI00102896 | RAB2B       | Ras-related protein Rab-2B                                        | Non-raft | 3         | 41/216            | 0                     | 0   | 3   | 1   | 3                       | 1                       | 3                        | 1                        | 3.00            | 1.099               | 0.275   |         |
| 634 | IPI00328180 | RAB34       | Isoform 1 of Ras-related protein Rab-34                           | Non-raft | 2         | 25/259            | 3                     | 2   | 0   | 0   | 3                       | 2                       | 3                        | 2                        | 1.50            | 0.405               | 0.621   |         |
| 635 | IPI00300096 | RAB35       | Ras-related protein Rab-35                                        | Non-raft | 6         | 67/201            | 8                     | 1   | 4   | 1   | 12                      | 2                       | 12                       | 2                        | 6.00            | 1.792               | 0.067   |         |
| 636 | IPI00023504 | RAB3A       | Ras-related protein Rab-3A                                        | Non-raft | 3         | 19/220            | 2                     | 0   | 3   | 1   | 5                       | 1                       | 5                        | 1                        | 5.00            | 1.609               | 0.103   |         |
| 637 | IPI00300562 | RAB3B       | Ras-related protein Rab-3B                                        | Non-raft | 4         | 62/219            | 5                     | 1   | 0   | 0   | 5                       | 1                       | 5                        | 1                        | 5.00            | 1.609               | 0.103   |         |
| 638 | IPI00032808 | RAB3D       | Ras-related protein Rab-3D                                        | Non-raft | 5         | 51/219            | 6                     | 1   | 0   | 0   | 6                       | 1                       | 6                        | 1                        | 6.00            | 1.792               | 0.067   |         |
| 639 | IPI00448725 | RAB4B       | RAB4B protein                                                     | Non-raft | 2         | 24/121            | 3                     | 1   | 0   | 0   | 3                       | 1                       | 3                        | 1                        | 3.00            | 1.099               | 0.275   |         |
| 640 | IPI00016339 | RAB5C       | Ras-related protein Rab-5C                                        | Non-raft | 3         | 40/216            | 4                     | 0   | 3   | 0   | 7                       | 0                       | 7                        | 0                        | 7.00            | 1.946               | 0.044   | M       |
| 641 | IPI00023526 | RAB6A       | RAB6A, member RAS oncogene family isoform b                       | Non-raft | 2         | 23/208            | 3                     | 1   | 0   | 0   | 3                       | 1                       | 3                        | 1                        | 3.00            | 1.099               | 0.275   |         |
| 642 | IPI00016891 | RAB6B       | Ras-related protein Rab-6B                                        | Non-raft | 2         | 22/208            | 0                     | 0   | 4   | 1   | 4                       | 1                       | 4                        | 1                        | 4.00            | 1.386               | 0.165   |         |
| 643 | IPI00016342 | RAB7A       | Ras-related protein Rab-7                                         | Non-raft | 5         | 78/207            | 4                     | 2   | 3   | 1   | 7                       | 3                       | 7                        | 3                        | 2.33            | 0.847               | 0.394   |         |
| 644 | IPI00028481 | RAB8A       | Ras-related protein Rab-8A                                        | Non-raft | 7         | 73/207            | 9                     | 2   | 7   | 2   | 16                      | 4                       | 16                       | 4                        | 4.00            | 1.386               | 0.165   |         |
| 645 | IPI00010271 | RAC1        | Isoform A of Ras-related C3 botulinum toxin substrate 1 precursor | Non-raft | 4         | 46/192            | 2                     | 1   | 6   | 0   | 8                       | 1                       | 14                       | 6                        | 2.33            | 0.847               | 0.394   |         |
|     | IPI00010271 | RAC1        | Isoform A of Ras-related C3 botulinum toxin substrate 1 precursor | Raft     | 5         | 29/192            | 6                     | 5   | 0   | 0   | 6                       | 5                       |                          |                          |                 |                     |         |         |
| 646 | IPI00019733 | RAE1        | mRNA-associated protein mmp 41                                    | Raft     | 3         | 42/368            | 1                     | 2   | 0   | 0   | 1                       | 2                       | 1                        | 2                        | 0.50            | -0.693              | 0.959   |         |
| 647 | IPI00217519 | RALA        | Ras-related protein Ral-A                                         | Non-raft | 7         | 91/206            | 8                     | 0   | 4   | 0   | 12                      | 0                       | 15                       | 0                        | 15.00           | 2.708               | 0.003   |         |
|     | IPI00217519 | RALA        | Ras-related protein Ral-A                                         | Raft     | 3         | 41/206            | 3                     | 0   | 0   | 0   | 3                       | 0                       |                          |                          |                 |                     |         |         |
| 648 | IPI00004397 | RALB        | Ras-related protein Ral-B                                         | Non-raft | 6         | 76/228            | 8                     | 0   | 3   | 0   | 11                      | 0                       | 17                       | 0                        | 17.00           | 2.833               | 0.002   |         |
|     | IPI00004397 | RALB        | Ras-related protein Ral-B                                         | Raft     | 3         | 28/228            | 3                     | 0   | 3   | 0   | 6                       | 0                       |                          |                          |                 |                     |         |         |
| 649 | IPI00643041 | RAN         | GTP-binding nuclear protein Ran                                   | Non-raft | 4         | 49/216            | 4                     | 0   | 1   | 0   | 5                       | 0                       | 5                        | 0                        | 5.00            | 1.609               | 0.103   |         |
| 650 | IPI00329200 | RANBP5      | 127 kDa protein                                                   | Non-raft | 5         | 75/1115           | 2                     | 3   | 1   | 0   | 3                       | 3                       | 3                        | 3                        | 1.00            | 0.000               | 0.799   | M       |
| 651 | IPI00015148 | RAP1B       | Ras-related protein Rap-1b precursor                              | Non-raft | 6         | 62/184            | 7                     | 3   | 5   | 1   | 12                      | 4                       | 12                       | 4                        | 3.00            | 1.099               | 0.275   | M       |
| 652 | IPI00019346 | RAP2A       | Ras-related protein Rap-2a                                        | Non-raft | 8         | 109/183           | 4                     | 0   | 9   | 0   | 13                      | 0                       | 13                       | 0                        | 13.00           | 2.565               | 0.006   | H       |
| 653 | IPI00018364 | RAP2B       | Ras-related protein Rap-2b precursor                              | Non-raft | 11        | 120/183           | 9                     | 0   | 12  | 0   | 21                      | 0                       | 29                       | 0                        | 29.00           | 3.367               | 0.000   | H       |
|     | IPI00018364 | RAP2B       | Ras-related protein Rap-2b precursor                              | Raft     | 3         | 42/183            | 5                     | 0   | 3   | 0   | 8                       | 0                       |                          |                          |                 |                     |         |         |
| 654 | IPI00009607 | RAP2C       | Ras-related protein Rap-2c precursor                              | Non-raft | 11        | 127/183           | 11                    | 1   | 14  | 0   | 25                      | 1                       | 25                       | 1                        | 25.00           | 3.219               | 0.000   | H       |
| 655 | IPI00004860 | RARS        | Isoform Complexed of Arginyl-tRNA synthetase, cytoplasmic         | Non-raft | 6         | 66/660            | 2                     | 4   | 3   | 2   | 5                       | 6                       | 5                        | 6                        | 0.83            | -0.182              | 0.859   |         |
| 656 | IPI00031755 | RCE1        | CAAX prenyl protease 2                                            | Non-raft | 2         | 27/329            | 2                     | 0   | 2   | 0   | 4                       | 0                       | 4                        | 0                        | 4.00            | 1.386               | 0.165   |         |
| 657 | IPI00339384 | RDH11       | Isoform 1 of Retinol dehydrogenase 11                             | Non-raft | 3         | 39/318            | 2                     | 0   | 1   | 2   | 3                       | 2                       | 3                        | 2                        | 1.50            | 0.405               | 0.621   |         |
| 658 | IPI00177940 | RDH14       | Retinol dehydrogenase 14                                          | Non-raft | 2         | 31/336            | 2                     | 1   | 0   | 0   | 2                       | 1                       | 2                        | 1                        | 2.00            | 0.693               | 0.473   |         |
| 659 | IPI00178431 | RECQL       | ATP-dependent DNA helicase Q1                                     | Non-raft | 6         | 81/649            | 5                     | 3   | 0   | 0   | 5                       | 3                       | 5                        | 3                        | 1.67            | 0.511               | 0.568   |         |
| 660 | IPI00024670 | REEP5       | Receptor expression-enhancing protein 5                           | Non-raft | 4         | 43/189            | 4                     | 0   | 2   | 0   | 6                       | 0                       | 6                        | 0                        | 6.00            | 1.792               | 0.067   |         |
| 661 | IPI00216890 | RELL1       | Similar to expressed sequence AA536743                            | Non-raft | 3         | 57/271            | 3                     | 0   | 0   | 0   | 3                       | 0                       | 8                        | 0                        | 8.00            | 2.079               | 0.030   |         |
|     | IPI00216890 | RELL1       | Similar to expressed sequence AA536743                            | Raft     | 4         | 50/271            | 5                     | 0   | 0   | 0   | 5                       | 0                       |                          |                          |                 |                     |         |         |
| 662 | IPI00017381 | RFC4        | Replication factor C subunit 4                                    | Raft     | 6         | 82/363            | 3                     | 4   | 2   | 2   | 5                       | 6                       | 5                        | 6                        | 0.83            | -0.182              | 0.859   |         |
| 663 | IPI00103867 | RFFL        | Isoform 1 of Rifiylin                                             | Non-raft | 3         | 58/363            | 3                     | 0   | 2   | 0   | 5                       | 0                       | 5                        | 0                        | 5.00            | 1.609               | 0.103   |         |
| 664 | IPI00005250 | RGS17       | Regulator of G-protein signaling 17                               | Raft     | 2         | 16/210            | 2                     | 0   | 0   | 0   | 2                       | 0                       | 2                        | 0                        | 2.00            | 0.693               | 0.473   |         |
| 665 | IPI00028108 | RGS19       | Regulator of G-protein signaling 19                               | Raft     | 2         | 27/217            | 1                     | 0   | 1   | 0   | 2                       | 0                       | 2                        | 0                        | 2.00            | 0.693               | 0.473   | M       |
| 666 | IPI00008802 | RGS20       | Isoform 6 of Regulator of G-protein signaling 20                  | Raft     | 6         | 116/388           | 9                     | 0   | 2   | 0   | 11                      | 0                       | 11                       | 0                        | 11.00           | 2.398               | 0.011   |         |
| 667 | IPI00027500 | RHOA        | Transforming protein RhoA precursor                               | Non-raft | 3         | 44/193            | 2                     | 1   | 5   | 0   | 7                       | 1                       | 7                        | 1                        | 7.00            | 1.946               | 0.044   |         |
| 668 | IPI00000041 | RHOB        | Rho-related GTP-binding protein RhoB precursor                    | Non-raft | 4         | 55/196            | 4                     | 1   | 7   | 0   | 11                      | 1                       | 11                       | 1                        | 11.00           | 2.398               | 0.011   |         |
| 669 | IPI00027434 | RHOC        | Rho-related GTP-binding protein RhoC precursor                    | Non-raft | 3         | 44/193            | 2                     | 1   | 3   | 0   | 5                       | 1                       | 5                        | 1                        | 5.00            | 1.609               | 0.103   |         |
| 670 | IPI00017342 | RHOG        | Rho-related GTP-binding protein RhoG precursor                    | Non-raft | 5         | 89/191            | 3                     | 1   | 6   | 1   | 9                       | 2                       | 9                        | 2                        | 4.50            | 1.504               | 0.130   |         |
| 671 | IPI00023511 | RNF167      | RING finger protein 167 precursor                                 | Non-raft | 2         | 22/350            | 3                     | 0   | 0   | 0   | 3                       | 0                       | 3                        | 0                        | 3.00            | 1.099               | 0.275   |         |
| 672 | IPI00550069 | RNH1        | Ribonuclease inhibitor                                            | Non-raft | 2         | 26/461            | 1                     | 2   | 0   | 1   | 1                       | 3                       | 1                        | 3                        | 0.33            | -1.099              | 0.988   |         |

| No. | Acc.Number  | Gene Symbol  | Description                                                                             | Fraction | Uni. Pep. | Sequence Coverage | Biological Replicates |     |     |     | Total EXP Each Fraction | Total CON Each Fraction | Total EXP Both Fractions | Total CON Both Fractions | EXP/CON Imputed | Ln(EXP/CON imputed) | P-value | 17-ODYA |
|-----|-------------|--------------|-----------------------------------------------------------------------------------------|----------|-----------|-------------------|-----------------------|-----|-----|-----|-------------------------|-------------------------|--------------------------|--------------------------|-----------------|---------------------|---------|---------|
|     |             |              |                                                                                         |          |           |                   | 1st                   |     | 2nd |     |                         |                         |                          |                          |                 |                     |         |         |
|     |             |              |                                                                                         |          |           |                   | EXP                   | CON | EXP | CON |                         |                         |                          |                          |                 |                     |         |         |
| 673 | IPI00010405 | ROR1         | Isoform Long of Tyrosine-protein kinase transmembrane receptor ROR1 precursor           | Non-raft | 4         | 49/937            | 4                     | 0   | 0   | 0   | 4                       | 0                       | 4                        | 0                        | 4.00            | 1.386               | 0.165   |         |
| 674 | IPI00301202 | RP11-217H1.1 | Implantation-associated protein precursor                                               | Non-raft | 2         | 19/367            | 1                     | 1   | 0   | 0   | 1                       | 1                       | 1                        | 1                        | 1.00            | 0.000               | 0.799   |         |
| 675 | IPI00026627 | RP2          | Protein XRP2                                                                            | Non-raft | 2         | 24/350            | 2                     | 0   | 0   | 0   | 2                       | 0                       | 5                        | 0                        | 5.00            | 1.609               | 0.103   |         |
|     | IPI00026627 | RP2          | Protein XRP2                                                                            | Raft     | 3         | 33/350            | 3                     | 0   | 0   | 0   | 3                       | 0                       |                          |                          |                 |                     |         |         |
| 676 | IPI00020127 | RPA1         | Replication protein A 70 kDa DNA-binding subunit                                        | Raft     | 9         | 129/616           | 9                     | 3   | 2   | 0   | 11                      | 3                       | 11                       | 3                        | 3.67            | 1.299               | 0.195   |         |
| 677 | IPI00412579 | RPL10A       | 60S ribosomal protein L10a                                                              | Raft     | 4         | 57/217            | 4                     | 1   | 1   | 0   | 5                       | 1                       | 5                        | 1                        | 5.00            | 1.609               | 0.103   | M       |
| 678 | IPI00376798 | RPL11        | ribosomal protein L11                                                                   | Non-raft | 5         | 59/178            | 2                     | 3   | 3   | 1   | 5                       | 4                       | 10                       | 6                        | 1.67            | 0.511               | 0.568   |         |
|     | IPI00376798 | RPL11        | ribosomal protein L11                                                                   | Raft     | 3         | 35/178            | 3                     | 1   | 2   | 1   | 5                       | 2                       |                          |                          |                 |                     |         |         |
| 679 | IPI00024933 | RPL12        | 60S ribosomal protein L12                                                               | Non-raft | 4         | 55/165            | 4                     | 1   | 5   | 1   | 9                       | 2                       | 18                       | 5                        | 3.60            | 1.281               | 0.202   | M       |
|     | IPI00024933 | RPL12        | 60S ribosomal protein L12                                                               | Raft     | 5         | 63/165            | 5                     | 2   | 4   | 1   | 9                       | 3                       |                          |                          |                 |                     |         |         |
| 680 | IPI00304612 | RPL13A       | 60S ribosomal protein L13a                                                              | Non-raft | 3         | 37/203            | 1                     | 0   | 2   | 0   | 3                       | 0                       | 3                        | 0                        | 3.00            | 1.099               | 0.275   |         |
| 681 | IPI00375511 | RPL15        | 26 kDa protein                                                                          | Non-raft | 2         | 23/204            | 0                     | 0   | 2   | 0   | 2                       | 0                       | 2                        | 0                        | 2.00            | 0.693               | 0.473   |         |
| 682 | IPI00215719 | RPL18        | 60S ribosomal protein L18                                                               | Non-raft | 2         | 24/188            | 1                     | 0   | 2   | 0   | 3                       | 0                       | 3                        | 0                        | 3.00            | 1.099               | 0.275   |         |
| 683 | IPI00219153 | RPL22        | 60S ribosomal protein L22                                                               | Non-raft | 5         | 60/128            | 5                     | 4   | 3   | 0   | 8                       | 4                       | 8                        | 4                        | 2.00            | 0.693               | 0.473   |         |
| 684 | IPI00182533 | RPL28        | 60S ribosomal protein L28                                                               | Non-raft | 2         | 23/137            | 1                     | 0   | 1   | 0   | 2                       | 0                       | 2                        | 0                        | 2.00            | 0.693               | 0.473   |         |
| 685 | IPI00550021 | RPL3         | 60S ribosomal protein L3                                                                | Non-raft | 4         | 58/403            | 5                     | 1   | 4   | 0   | 9                       | 1                       | 15                       | 1                        | 15.00           | 2.708               | 0.003   | H       |
|     | IPI00550021 | RPL3         | 60S ribosomal protein L3                                                                | Raft     | 4         | 65/403            | 5                     | 0   | 1   | 0   | 6                       | 0                       |                          |                          |                 |                     |         |         |
| 686 | IPI00219156 | RPL30        | 60S ribosomal protein L30                                                               | Non-raft | 3         | 40/115            | 1                     | 1   | 5   | 0   | 6                       | 1                       | 9                        | 1                        | 9.00            | 2.197               | 0.021   |         |
|     | IPI00219156 | RPL30        | 60S ribosomal protein L30                                                               | Raft     | 3         | 40/115            | 0                     | 0   | 3   | 0   | 3                       | 0                       |                          |                          |                 |                     |         |         |
| 687 | IPI00029731 | RPL35A       | 60S ribosomal protein L35a                                                              | Non-raft | 2         | 20/110            | 1                     | 0   | 1   | 0   | 2                       | 0                       | 2                        | 0                        | 2.00            | 0.693               | 0.473   |         |
| 688 | IPI00000494 | RPL5         | 60S ribosomal protein L5                                                                | Non-raft | 2         | 31/297            | 1                     | 0   | 1   | 0   | 2                       | 0                       | 39                       | 13                       | 3.00            | 1.099               | 0.275   | M       |
|     | IPI00000494 | RPL5         | 60S ribosomal protein L5                                                                | Raft     | 16        | 171/297           | 30                    | 13  | 7   | 0   | 37                      | 13                      |                          |                          |                 |                     |         |         |
| 689 | IPI00030179 | RPL7         | 60S ribosomal protein L7                                                                | Non-raft | 2         | 25/248            | 1                     | 1   | 1   | 0   | 2                       | 1                       | 2                        | 1                        | 2.00            | 0.693               | 0.473   |         |
| 690 | IPI00012772 | RPL8         | 60S ribosomal protein L8                                                                | Non-raft | 3         | 35/257            | 3                     | 0   | 0   | 0   | 3                       | 0                       | 3                        | 0                        | 3.00            | 1.099               | 0.275   |         |
| 691 | IPI00031691 | RPL9         | 60S ribosomal protein L9                                                                | Non-raft | 4         | 39/192            | 1                     | 2   | 3   | 0   | 4                       | 2                       | 7                        | 2                        | 3.50            | 1.253               | 0.212   |         |
|     | IPI00031691 | RPL9         | 60S ribosomal protein L9                                                                | Raft     | 2         | 41/192            | 2                     | 0   | 1   | 0   | 3                       | 0                       |                          |                          |                 |                     |         |         |
| 692 | IPI00008530 | RPLP0        | 60S acidic ribosomal protein P0                                                         | Non-raft | 4         | 60/317            | 3                     | 1   | 3   | 2   | 6                       | 3                       | 12                       | 8                        | 1.50            | 0.405               | 0.621   |         |
|     | IPI00008530 | RPLP0        | 60S acidic ribosomal protein P0                                                         | Raft     | 4         | 46/317            | 4                     | 3   | 2   | 2   | 6                       | 5                       |                          |                          |                 |                     |         |         |
| 693 | IPI00025874 | RPN1         | Dolichyl-diphosphooligosaccharide--protein glycosyltransferase 67 kDa subunit precursor | Non-raft | 12        | 168/646           | 13                    | 8   | 8   | 5   | 21                      | 13                      | 21                       | 13                       | 1.62            | 0.480               | 0.584   |         |
| 694 | IPI00301271 | RPN2         | Dolichyl-diphosphooligosaccharide--protein glycosyltransferase 63 kDa subunit precursor | Non-raft | 8         | 130/647           | 9                     | 1   | 3   | 1   | 12                      | 2                       | 12                       | 2                        | 6.00            | 1.792               | 0.067   |         |
| 695 | IPI00025091 | RPS11        | 40S ribosomal protein S11                                                               | Non-raft | 3         | 33/158            | 3                     | 0   | 2   | 0   | 5                       | 0                       | 5                        | 0                        | 5.00            | 1.609               | 0.103   |         |
| 696 | IPI00013917 | RPS12        | 40S ribosomal protein S12                                                               | Non-raft | 4         | 54/132            | 2                     | 1   | 4   | 1   | 6                       | 2                       | 22                       | 9                        | 2.44            | 0.894               | 0.371   |         |
|     | IPI00013917 | RPS12        | 40S ribosomal protein S12                                                               | Raft     | 6         | 67/132            | 9                     | 6   | 7   | 1   | 16                      | 7                       |                          |                          |                 |                     |         |         |
| 697 | IPI00221091 | RPS15A       | 40S ribosomal protein S15a                                                              | Non-raft | 2         | 11/130            | 2                     | 0   | 0   | 0   | 2                       | 0                       | 5                        | 0                        | 5.00            | 1.609               | 0.103   |         |
|     | IPI00221091 | RPS15A       | 40S ribosomal protein S15a                                                              | Raft     | 3         | 19/130            | 2                     | 0   | 1   | 0   | 3                       | 0                       |                          |                          |                 |                     |         |         |
| 698 | IPI00221092 | RPS16        | 40S ribosomal protein S16                                                               | Raft     | 2         | 22/146            | 1                     | 1   | 1   | 0   | 2                       | 1                       | 2                        | 1                        | 2.00            | 0.693               | 0.473   | M       |
| 699 | IPI00221093 | RPS17        | 40S ribosomal protein S17                                                               | Raft     | 2         | 32/135            | 2                     | 0   | 0   | 0   | 2                       | 0                       | 2                        | 0                        | 2.00            | 0.693               | 0.473   |         |
| 700 | IPI00013485 | RPS2         | 40S ribosomal protein S2                                                                | Non-raft | 2         | 19/293            | 1                     | 0   | 0   | 1   | 1                       | 1                       | 4                        | 3                        | 1.33            | 0.288               | 0.678   | M       |
|     | IPI00013485 | RPS2         | 40S ribosomal protein S2                                                                | Raft     | 4         | 45/293            | 1                     | 2   | 2   | 0   | 3                       | 2                       |                          |                          |                 |                     |         |         |
| 701 | IPI00012493 | RPS20        | 40S ribosomal protein S20                                                               | Non-raft | 2         | 19/119            | 2                     | 0   | 1   | 0   | 3                       | 0                       | 6                        | 1                        | 6.00            | 1.792               | 0.067   |         |
|     | IPI00012493 | RPS20        | 40S ribosomal protein S20                                                               | Raft     | 3         | 30/119            | 2                     | 1   | 1   | 0   | 3                       | 1                       |                          |                          |                 |                     |         |         |
| 702 | IPI00017448 | RPS21        | 40S ribosomal protein S21                                                               | Raft     | 5         | 37/83             | 5                     | 4   | 2   | 0   | 7                       | 4                       | 7                        | 4                        | 1.75            | 0.560               | 0.543   |         |
| 703 | IPI00029750 | RPS24        | Isoform 1 of 40S ribosomal protein S24                                                  | Non-raft | 2         | 27/133            | 0                     | 1   | 1   | 0   | 1                       | 1                       | 1                        | 1                        | 1.00            | 0.000               | 0.799   |         |
| 704 | IPI00179330 | RPS27A       | ubiquitin and ribosomal protein S27a precursor                                          | Non-raft | 6         | 83/156            | 17                    | 3   | 5   | 3   | 22                      | 6                       | 38                       | 8                        | 4.75            | 1.558               | 0.116   |         |
|     | IPI00179330 | RPS27A       | ubiquitin and ribosomal protein S27a precursor                                          | Raft     | 6         | 64/156            | 10                    | 2   | 6   | 0   | 16                      | 2                       |                          |                          |                 |                     |         |         |

| No. | Acc.Number  | Gene Symbol | Description                                                                        | Fraction | Uni. Pep. | Sequence Coverage | Biological Replicates |     |     |     | Total EXP Each Fraction | Total CON Each Fraction | Total EXP Both Fractions | Total CON Both Fractions | EXP/CON Imputed | Ln(EXP/CON imputed) | P-value | 17-ODYA |
|-----|-------------|-------------|------------------------------------------------------------------------------------|----------|-----------|-------------------|-----------------------|-----|-----|-----|-------------------------|-------------------------|--------------------------|--------------------------|-----------------|---------------------|---------|---------|
|     |             |             |                                                                                    |          |           |                   | 1st                   |     | 2nd |     |                         |                         |                          |                          |                 |                     |         |         |
|     |             |             |                                                                                    |          |           |                   | EXP                   | CON | EXP | CON |                         |                         |                          |                          |                 |                     |         |         |
| 705 | IPI00011253 | RPS3        | 40S ribosomal protein S3                                                           | Non-raft | 6         | 86/243            | 5                     | 4   | 5   | 2   | 10                      | 6                       | 29                       | 16                       | 1.81            | 0.595               | 0.525   |         |
|     | IPI00011253 | RPS3        | 40S ribosomal protein S3                                                           | Raft     | 12        | 170/243           | 13                    | 7   | 6   | 3   | 19                      | 10                      |                          |                          |                 |                     |         |         |
| 706 | IPI00419880 | RPS3A       | 40S ribosomal protein S3a                                                          | Non-raft | 2         | 23/264            | 2                     | 0   | 0   | 0   | 2                       | 0                       | 6                        | 1                        | 6.00            | 1.792               | 0.067   | M       |
|     | IPI00419880 | RPS3A       | 40S ribosomal protein S3a                                                          | Raft     | 4         | 54/264            | 4                     | 1   | 0   | 0   | 4                       | 1                       |                          |                          |                 |                     |         |         |
| 707 | IPI00008433 | RPS5        | 40S ribosomal protein S5                                                           | Non-raft | 3         | 38/204            | 5                     | 0   | 5   | 3   | 10                      | 3                       | 29                       | 9                        | 3.22            | 1.170               | 0.245   | H       |
|     | IPI00008433 | RPS5        | 40S ribosomal protein S5                                                           | Raft     | 5         | 55/204            | 10                    | 4   | 9   | 2   | 19                      | 6                       |                          |                          |                 |                     |         |         |
| 708 | IPI00013415 | RPS7        | 40S ribosomal protein S7                                                           | Non-raft | 2         | 15/194            | 0                     | 0   | 2   | 0   | 2                       | 0                       | 2                        | 0                        | 2.00            | 0.693               | 0.473   |         |
| 709 | IPI00216587 | RPS8        | 40S ribosomal protein S8                                                           | Non-raft | 4         | 52/208            | 3                     | 2   | 4   | 0   | 7                       | 2                       | 13                       | 6                        | 2.17            | 0.773               | 0.432   |         |
|     | IPI00216587 | RPS8        | 40S ribosomal protein S8                                                           | Raft     | 4         | 40/208            | 4                     | 3   | 2   | 1   | 6                       | 4                       |                          |                          |                 |                     |         |         |
| 710 | IPI00221088 | RPS9        | 40S ribosomal protein S9                                                           | Raft     | 3         | 21/194            | 2                     | 0   | 1   | 0   | 3                       | 0                       | 3                        | 0                        | 3.00            | 1.099               | 0.275   | M       |
| 711 | IPI00413108 | RPSA        | Ribosomal protein SA                                                               | Non-raft | 3         | 175/300           | 3                     | 1   | 2   | 2   | 5                       | 3                       | 37                       | 17                       | 2.18            | 0.778               | 0.430   |         |
|     | IPI00413108 | RPSA        | Ribosomal protein SA                                                               | Raft     | 12        | 46/300            | 18                    | 8   | 14  | 6   | 32                      | 14                      |                          |                          |                 |                     |         |         |
| 712 | IPI00023101 | RQCD1       | Homo sapiens protein involved in sexual development, complete cds                  | Raft     | 2         | 32/299            | 2                     | 0   | 0   | 0   | 2                       | 0                       | 2                        | 0                        | 2.00            | 0.693               | 0.473   |         |
| 713 | IPI00020418 | RRAS        | Ras-related protein R-Ras                                                          | Non-raft | 10        | 98/218            | 15                    | 0   | 10  | 1   | 25                      | 1                       | 30                       | 1                        | 30.00           | 3.401               | 0.000   | H       |
|     | IPI00020418 | RRAS        | Ras-related protein R-Ras                                                          | Raft     | 2         | 33/218            | 5                     | 0   | 0   | 0   | 5                       | 0                       |                          |                          |                 |                     |         |         |
| 714 | IPI00012512 | RRAS2       | Ras-related protein R-Ras2                                                         | Non-raft | 14        | 162/204           | 17                    | 0   | 19  | 0   | 36                      | 0                       | 51                       | 0                        | 51.00           | 3.932               | 0.000   |         |
|     | IPI00012512 | RRAS2       | Ras-related protein R-Ras2                                                         | Raft     | 6         | 76/204            | 9                     | 0   | 6   | 0   | 15                      | 0                       |                          |                          |                 |                     |         |         |
| 715 | IPI00215743 | RRBP1       | Isoform 3 of Ribosome-binding protein 1                                            | Raft     | 18        | 240/1410          | 16                    | 8   | 0   | 0   | 16                      | 8                       | 16                       | 8                        | 2.00            | 0.693               | 0.473   |         |
| 716 | IPI00061267 | RSPRY1      | Ring finger and SPRY domain containing 1                                           | Non-raft | 8         | 126/576           | 10                    | 1   | 6   | 0   | 16                      | 1                       | 33                       | 1                        | 33.00           | 3.497               | 0.000   | M       |
|     | IPI00061267 | RSPRY1      | Ring finger and SPRY domain containing 1                                           | Raft     | 7         | 98/576            | 9                     | 0   | 8   | 0   | 17                      | 0                       |                          |                          |                 |                     |         |         |
| 717 | IPI00021766 | RTN4        | Isoform 1 of Reticulon-4                                                           | Non-raft | 2         | 28/1192           | 1                     | 0   | 1   | 0   | 2                       | 0                       | 2                        | 0                        | 2.00            | 0.693               | 0.473   | H       |
| 718 | IPI00298289 | RTN4        | Isoform 2 of Reticulon-4                                                           | Non-raft | 2         | 22/373            | 2                     | 0   | 0   | 0   | 2                       | 0                       | 2                        | 0                        | 2.00            | 0.693               | 0.473   | H       |
| 719 | IPI00021187 | RUVBL1      | Isoform 1 of RuvB-like 1                                                           | Non-raft | 3         | 38/456            | 2                     | 0   | 1   | 0   | 3                       | 0                       | 16                       | 8                        | 2.00            | 0.693               | 0.473   |         |
|     | IPI00021187 | RUVBL1      | Isoform 1 of RuvB-like 1                                                           | Raft     | 8         | 108/456           | 9                     | 6   | 4   | 2   | 13                      | 8                       |                          |                          |                 |                     |         |         |
| 720 | IPI00009104 | RUVBL2      | RuvB-like 2                                                                        | Raft     | 10        | 120/463           | 8                     | 6   | 2   | 1   | 10                      | 7                       | 10                       | 7                        | 1.43            | 0.357               | 0.645   | M       |
| 721 | IPI00007047 | S100A8      | Protein S100-A8                                                                    | Non-raft | 2         | 22/93             | 1                     | 1   | 2   | 2   | 3                       | 3                       | 3                        | 3                        | 1.00            | 0.000               | 0.799   |         |
| 722 | IPI00005129 | SCAMP1      | Isoform 1 of Secretory carrier-associated membrane protein 1                       | Non-raft | 11        | 134/338           | 28                    | 0   | 14  | 0   | 42                      | 0                       | 44                       | 0                        | 44.00           | 3.784               | 0.000   | H       |
|     | IPI00005129 | SCAMP1      | Isoform 1 of Secretory carrier-associated membrane protein 1                       | Raft     | 2         | 36/338            | 2                     | 0   | 0   | 0   | 2                       | 0                       |                          |                          |                 |                     |         |         |
| 723 | IPI00218850 | SCAMP2      | Secretory carrier-associated membrane protein 2                                    | Non-raft | 5         | 77/329            | 12                    | 0   | 5   | 0   | 17                      | 0                       | 17                       | 0                        | 17.00           | 2.833               | 0.002   | H       |
| 724 | IPI00306382 | SCAMP3      | Isoform 1 of Secretory carrier-associated membrane protein 3                       | Non-raft | 9         | 142/347           | 26                    | 6   | 24  | 0   | 50                      | 6                       | 57                       | 6                        | 9.50            | 2.251               | 0.018   | H       |
|     | IPI00306382 | SCAMP3      | Isoform 1 of Secretory carrier-associated membrane protein 3                       | Raft     | 4         | 51/347            | 5                     | 0   | 2   | 0   | 7                       | 0                       |                          |                          |                 |                     |         |         |
| 725 | IPI00056310 | SCAMP4      | Secretory carrier-associated membrane protein 4                                    | Non-raft | 3         | 34/229            | 11                    | 0   | 10  | 0   | 21                      | 0                       | 21                       | 0                        | 21.00           | 3.045               | 0.001   |         |
| 726 | IPI00177968 | SCARB1      | Isoform 1 of Scavenger receptor class B member 1                                   | Non-raft | 11        | 131/509           | 13                    | 2   | 10  | 1   | 23                      | 3                       | 26                       | 3                        | 8.67            | 2.159               | 0.024   |         |
|     | IPI00177968 | SCARB1      | Isoform 1 of Scavenger receptor class B member 1                                   | Raft     | 2         | 20/509            | 2                     | 0   | 1   | 0   | 3                       | 0                       |                          |                          |                 |                     |         |         |
| 727 | IPI00217766 | SCARB2      | Lysosome membrane protein 2                                                        | Non-raft | 10        | 125/478           | 18                    | 0   | 8   | 0   | 26                      | 0                       | 26                       | 0                        | 26.00           | 3.258               | 0.000   |         |
| 728 | IPI00329600 | SCCPDH      | Probable saccharopine dehydrogenase                                                | Non-raft | 2         | 22/429            | 2                     | 0   | 0   | 0   | 2                       | 0                       | 2                        | 0                        | 2.00            | 0.693               | 0.473   | M       |
| 729 | IPI00165261 | SCFD1       | Sec1 family domain-containing protein 1                                            | Non-raft | 2         | 30/642            | 2                     | 1   | 0   | 0   | 2                       | 1                       | 2                        | 1                        | 2.00            | 0.693               | 0.473   |         |
| 730 | IPI00410666 | SCRIB       | Isoform 3 of Protein LAP4                                                          | Non-raft | 15        | 212/1655          | 23                    | 0   | 9   | 0   | 32                      | 0                       | 40                       | 0                        | 40.00           | 3.689               | 0.000   | H       |
|     | IPI00410666 | SCRIB       | Isoform 3 of Protein LAP4                                                          | Raft     | 4         | 61/1655           | 5                     | 0   | 3   | 0   | 8                       | 0                       |                          |                          |                 |                     |         |         |
| 731 | IPI00106642 | SDF2L1      | Dihydropyrimidinase-like 2                                                         | Non-raft | 2         | 26/619            | 1                     | 0   | 2   | 0   | 3                       | 0                       | 3                        | 0                        | 3.00            | 1.099               | 0.275   |         |
| 732 | IPI00305166 | SDHA        | Succinate dehydrogenase [ubiquinone] flavoprotein subunit, mitochondrial precursor | Non-raft | 16        | 220/668           | 16                    | 10  | 8   | 2   | 24                      | 12                      | 24                       | 12                       | 2.00            | 0.693               | 0.473   |         |
| 733 | IPI00006865 | SEC22B      | Vesicle-trafficking protein SEC22b                                                 | Non-raft | 2         | 30/215            | 2                     | 0   | 1   | 0   | 3                       | 0                       | 3                        | 0                        | 3.00            | 1.099               | 0.275   |         |
| 734 | IPI00218922 | SEC63       | Translocation protein SEC63 homolog                                                | Non-raft | 2         | 22/760            | 2                     | 0   | 0   | 0   | 2                       | 0                       | 2                        | 0                        | 2.00            | 0.693               | 0.473   |         |
| 735 | IPI00185533 | SEH1L       | Isoform A of Nucleoporin SEH1-like                                                 | Raft     | 4         | 49/360            | 2                     | 1   | 1   | 0   | 3                       | 1                       | 3                        | 1                        | 3.00            | 1.099               | 0.275   |         |
| 736 | IPI00153055 | SEPT10      | Isoform 2 of Septin-10                                                             | Non-raft | 3         | 36/503            | 1                     | 1   | 1   | 0   | 2                       | 1                       | 2                        | 1                        | 2.00            | 0.693               | 0.473   |         |
| 737 | IPI00019376 | SEPT11      | Septin-11                                                                          | Non-raft | 4         | 40/429            | 4                     | 1   | 2   | 1   | 6                       | 2                       | 6                        | 2                        | 3.00            | 1.099               | 0.275   |         |

| No. | Acc.Number   | Gene Symbol | Description                                                                                                                     | Fraction | Uni. Pep. | Sequence Coverage | Biological Replicates |     |     |     | Total EXP Each Fraction | Total CON Each Fraction | Total EXP Both Fractions | Total CON Both Fractions | EXP/CON Imputed | Ln(EXP/CON imputed) | P-value | 17-ODYA |
|-----|--------------|-------------|---------------------------------------------------------------------------------------------------------------------------------|----------|-----------|-------------------|-----------------------|-----|-----|-----|-------------------------|-------------------------|--------------------------|--------------------------|-----------------|---------------------|---------|---------|
|     |              |             |                                                                                                                                 |          |           |                   | 1st                   |     | 2nd |     |                         |                         |                          |                          |                 |                     |         |         |
|     |              |             |                                                                                                                                 |          |           |                   | EXP                   | CON | EXP | CON |                         |                         |                          |                          |                 |                     |         |         |
| 738 | IPI00014177  | SEPT2       | Septin-2                                                                                                                        | Non-raft | 9         | 134/361           | 6                     | 3   | 6   | 2   | 12                      | 5                       | 12                       | 5                        | 2.40            | 0.875               | 0.380   |         |
| 739 | IPI00216139  | SEPT6       | septin 6 isoform A                                                                                                              | Non-raft | 2         | 17/427            | 2                     | 0   | 0   | 0   | 2                       | 0                       | 2                        | 0                        | 2.00            | 0.693               | 0.473   |         |
| 740 | IPI00033025  | SEPT7       | Septin-7                                                                                                                        | Non-raft | 7         | 108/438           | 5                     | 1   | 2   | 0   | 7                       | 1                       | 9                        | 2                        | 4.50            | 1.504               | 0.130   |         |
|     | IPI00033025  | SEPT7       | Septin-7                                                                                                                        | Raft     | 3         | 35/438            | 2                     | 1   | 0   | 0   | 2                       | 1                       |                          |                          |                 |                     |         |         |
| 741 | IPI00784614  | SEPT9       | Isoform 1 of Septin-9                                                                                                           | Non-raft | 12        | 154/586           | 11                    | 4   | 3   | 2   | 14                      | 6                       | 16                       | 6                        | 2.67            | 0.981               | 0.329   |         |
|     | IPI00784614  | SEPT9       | Isoform 1 of Septin-9                                                                                                           | Raft     | 2         | 22/586            | 2                     | 0   | 0   | 0   | 2                       | 0                       |                          |                          |                 |                     |         |         |
| 742 | IPI00410693  | SERBP1      | Isoform 1 of Plasminogen activator inhibitor 1 RNA-binding protein                                                              | Raft     | 3         | 47/408            | 3                     | 3   | 0   | 0   | 3                       | 3                       | 3                        | 3                        | 1.00            | 0.000               | 0.799   | H       |
| 743 | IPI00413817  | SERINC1     | Serine incorporator 1                                                                                                           | Non-raft | 2         | 30/453            | 2                     | 0   | 2   | 0   | 4                       | 0                       | 4                        | 0                        | 4.00            | 1.386               | 0.165   |         |
| 744 | IPI00553177  | SERPINA1    | Alpha-1-antitrypsin precursor                                                                                                   | Non-raft | 2         | 32/418            | 0                     | 0   | 4   | 5   | 4                       | 5                       | 4                        | 5                        | 0.80            | -0.223              | 0.871   |         |
| 745 | IPI00033583  | SERPINB12   | Serpin B12                                                                                                                      | Non-raft | 2         | 20/405            | 0                     | 2   | 0   | 0   | 0                       | 2                       | 0                        | 2                        | 0.50            | -0.693              | 0.959   |         |
| 746 | IPI00300371  | SF3B3       | Splicing factor 3B subunit 3                                                                                                    | Raft     | 8         | 118/1217          | 7                     | 3   | 1   | 0   | 8                       | 3                       | 8                        | 3                        | 2.67            | 0.981               | 0.329   |         |
| 747 | IPI00010740  | SFPQ        | Isoform Long of Splicing factor, proline- and glutamine-rich                                                                    | Raft     | 2         | 22/707            | 1                     | 1   | 0   | 0   | 1                       | 1                       | 1                        | 1                        | 1.00            | 0.000               | 0.799   | M       |
| 748 | IPI00166444  | SFT2D3      | Vesicle transport protein SFT2C                                                                                                 | Non-raft | 2         | 28/215            | 1                     | 0   | 2   | 0   | 3                       | 0                       | 3                        | 0                        | 3.00            | 1.099               | 0.275   | M       |
| 749 | IPI00009368  | SFXN1       | Sideroflexin-1                                                                                                                  | Non-raft | 3         | 46/322            | 3                     | 1   | 1   | 0   | 4                       | 1                       | 4                        | 1                        | 4.00            | 1.386               | 0.165   |         |
| 750 | IPI00002520  | SHMT2       | Serine hydroxymethyltransferase, mitochondrial precursor                                                                        | Non-raft | 14        | 182/504           | 11                    | 9   | 5   | 4   | 16                      | 13                      | 16                       | 13                       | 1.23            | 0.208               | 0.715   | M       |
| 751 | IPI00647217  | SKIV2L2     | Superkiller viralicidic activity 2-like 2                                                                                       | Raft     | 7         | 89/1042           | 6                     | 3   | 0   | 0   | 6                       | 3                       | 6                        | 3                        | 2.00            | 0.693               | 0.473   |         |
| 752 | IPI000394753 | SLC11A2     | Isoform 1 of Natural resistance-associated macrophage protein 2                                                                 | Non-raft | 2         | 37/561            | 0                     | 0   | 2   | 0   | 2                       | 0                       | 2                        | 0                        | 2.00            | 0.693               | 0.473   |         |
| 753 | IPI00006666  | SLC16A3     | Monocarboxylate transporter 4                                                                                                   | Non-raft | 4         | 64/465            | 5                     | 0   | 2   | 0   | 7                       | 0                       | 7                        | 0                        | 7.00            | 1.946               | 0.044   |         |
| 754 | IPI00375452  | SLC19A1     | Folate transporter 1                                                                                                            | Non-raft | 5         | 91/591            | 6                     | 0   | 2   | 0   | 8                       | 0                       | 8                        | 0                        | 8.00            | 2.079               | 0.030   |         |
| 755 | IPI00019472  | SLC1A5      | Neutral amino acid transporter B(0)                                                                                             | Non-raft | 15        | 211/541           | 25                    | 2   | 16  | 1   | 41                      | 3                       | 41                       | 3                        | 13.67           | 2.615               | 0.005   |         |
| 756 | IPI00022202  | SLC25A3     | Isoform A of Phosphate carrier protein, mitochondrial precursor                                                                 | Non-raft | 7         | 74/362            | 7                     | 6   | 4   | 1   | 11                      | 7                       | 11                       | 7                        | 1.57            | 0.452               | 0.598   | H       |
| 757 | IPI00007188  | SLC25A5     | ADP/ATP translocase 2                                                                                                           | Non-raft | 9         | 89/298            | 9                     | 2   | 7   | 2   | 16                      | 4                       | 16                       | 4                        | 4.00            | 1.386               | 0.165   |         |
| 758 | IPI00291467  | SLC25A6     | ADP/ATP translocase 3                                                                                                           | Non-raft | 8         | 85/298            | 8                     | 5   | 8   | 4   | 16                      | 9                       | 16                       | 9                        | 1.78            | 0.575               | 0.535   | H       |
| 759 | IPI00032107  | SLC26A2     | Sulfate transporter                                                                                                             | Non-raft | 10        | 129/739           | 9                     | 0   | 2   | 0   | 11                      | 0                       | 15                       | 0                        | 15.00           | 2.708               | 0.003   |         |
|     | IPI00032107  | SLC26A2     | Sulfate transporter                                                                                                             | Raft     | 4         | 53/739            | 4                     | 0   | 0   | 0   | 4                       | 0                       |                          |                          |                 |                     |         |         |
| 760 | IPI00024787  | SLC27A2     | Very-long-chain acyl-CoA synthetase                                                                                             | Non-raft | 2         | 22/620            | 2                     | 0   | 0   | 0   | 2                       | 0                       | 2                        | 0                        | 2.00            | 0.693               | 0.473   |         |
| 761 | IPI00550382  | SLC29A1     | Equilibrative nucleoside transporter 1                                                                                          | Non-raft | 2         | 34/535            | 2                     | 0   | 0   | 0   | 2                       | 0                       | 2                        | 0                        | 2.00            | 0.693               | 0.473   |         |
| 762 | IPI00220194  | SLC2A1      | Solute carrier family 2, facilitated glucose transporter member 1                                                               | Non-raft | 6         | 47/492            | 7                     | 5   | 6   | 3   | 13                      | 8                       | 22                       | 14                       | 1.57            | 0.452               | 0.598   |         |
|     | IPI00220194  | SLC2A1      | Solute carrier family 2, facilitated glucose transporter member 1                                                               | Raft     | 3         | 35/492            | 5                     | 4   | 4   | 2   | 9                       | 6                       |                          |                          |                 |                     |         |         |
| 763 | IPI00179969  | SLC2A6      | CDNA FLJ90355 fis, clone NT2RP2003469, moderately similar to Solute carrier family 2, facilitated glucose transporter, member 6 | Non-raft | 3         | 27/445            | 3                     | 0   | 0   | 0   | 3                       | 0                       | 3                        | 0                        | 3.00            | 1.099               | 0.275   |         |
| 764 | IPI00784764  | SLC30A1     | solute carrier family 30 (zinc transporter), member 1                                                                           | Non-raft | 4         | 71/507            | 5                     | 0   | 0   | 0   | 5                       | 0                       | 5                        | 0                        | 5.00            | 1.609               | 0.103   |         |
| 765 | IPI00384867  | SLC35B2     | Isoform 2 of Adenosine 3'-phospho 5'-phosphosulfate transporter 1                                                               | Non-raft | 4         | 56/392            | 5                     | 1   | 5   | 0   | 10                      | 1                       | 10                       | 1                        | 10.00           | 2.303               | 0.015   | M       |
| 766 | IPI00410034  | SLC38A2     | Putative 40-9-1 protein                                                                                                         | Non-raft | 5         | 74/506            | 5                     | 1   | 4   | 0   | 9                       | 1                       | 9                        | 1                        | 9.00            | 2.197               | 0.021   | H       |
| 767 | IPI00100585  | SLC39A1     | Zinc transporter ZIP1                                                                                                           | Non-raft | 2         | 45/324            | 2                     | 0   | 0   | 0   | 2                       | 0                       | 2                        | 0                        | 2.00            | 0.693               | 0.473   |         |
| 768 | IPI00014236  | SLC39A14    | KIAA0062 protein                                                                                                                | Non-raft | 3         | 45/492            | 6                     | 2   | 3   | 1   | 9                       | 3                       | 9                        | 3                        | 3.00            | 1.099               | 0.275   |         |
| 769 | IPI00027493  | SLC3A2      | 4F2 cell-surface antigen heavy chain                                                                                            | Non-raft | 13        | 175/529           | 13                    | 7   | 5   | 3   | 18                      | 10                      | 18                       | 10                       | 1.80            | 0.588               | 0.528   |         |
| 770 | IPI00221393  | SLC44A1     | Isoform 1 of Choline transporter-like protein 1                                                                                 | Non-raft | 12        | 151/657           | 23                    | 0   | 15  | 0   | 38                      | 0                       | 38                       | 0                        | 38.00           | 3.638               | 0.000   |         |
| 771 | IPI00293074  | SLC44A2     | Isoform 2 of Choline transporter-like protein 2                                                                                 | Non-raft | 3         | 34/709            | 1                     | 0   | 2   | 0   | 3                       | 0                       | 3                        | 0                        | 3.00            | 1.099               | 0.275   |         |
| 772 | IPI00043883  | SLC46A1     | Isoform 1 of Heme carrier protein 1                                                                                             | Non-raft | 2         | 25/459            | 4                     | 0   | 0   | 0   | 4                       | 0                       | 4                        | 0                        | 4.00            | 1.386               | 0.165   |         |
| 773 | IPI00383597  | SLC4A2      | Isoform A of Anion exchange protein 2                                                                                           | Non-raft | 3         | 36/1241           | 3                     | 0   | 0   | 0   | 3                       | 0                       | 3                        | 0                        | 3.00            | 1.099               | 0.275   |         |
| 774 | IPI00031822  | SLC5A6      | Sodium-dependent multivitamin transporter                                                                                       | Non-raft | 5         | 67/635            | 5                     | 0   | 2   | 0   | 7                       | 0                       | 7                        | 0                        | 7.00            | 1.946               | 0.044   | M       |
| 775 | IPI00027728  | SLC7A1      | High-affinity cationic amino acid transporter 1                                                                                 | Non-raft | 4         | 42/629            | 5                     | 0   | 3   | 0   | 8                       | 0                       | 8                        | 0                        | 8.00            | 2.079               | 0.030   | M       |
| 776 | IPI00008986  | SLC7A5      | Large neutral amino acids transporter small subunit 1                                                                           | Non-raft | 2         | 32/507            | 4                     | 2   | 0   | 0   | 4                       | 2                       | 4                        | 2                        | 2.00            | 0.693               | 0.473   |         |
| 777 | IPI00385034  | SLC9A3R2    | Isoform 1 of Na(+)/H(+) exchange regulatory cofactor NHE-RF2                                                                    | Raft     | 2         | 22/337            | 1                     | 1   | 0   | 0   | 1                       | 1                       | 1                        | 1                        | 1.00            | 0.000               | 0.799   |         |

| No. | Acc.Number  | Gene Symbol | Description                                                                  | Fraction | Uni. Pep. | Sequence Coverage | Biological Replicates |     |     |     | Total EXP Each Fraction | Total CON Each Fraction | Total EXP Both Fractions | Total CON Both Fractions | EXP/CON Imputed | Ln(EXP/CON imputed) | P-value | 17-ODYA |
|-----|-------------|-------------|------------------------------------------------------------------------------|----------|-----------|-------------------|-----------------------|-----|-----|-----|-------------------------|-------------------------|--------------------------|--------------------------|-----------------|---------------------|---------|---------|
|     |             |             |                                                                              |          |           |                   | 1st                   |     | 2nd |     |                         |                         |                          |                          |                 |                     |         |         |
|     |             |             |                                                                              |          |           |                   | EXP                   | CON | EXP | CON |                         |                         |                          |                          |                 |                     |         |         |
| 778 | IPI00100858 | SLCO4A1     | Isoform 1 of Solute carrier organic anion transporter family member 4A1      | Non-raft | 4         | 55/722            | 5                     | 0   | 0   | 0   | 5                       | 0                       | 5                        | 0                        | 5.00            | 1.609               | 0.103   |         |
| 779 | IPI00291939 | SMC1A       | Structural maintenance of chromosome 1-like 1 protein                        | Raft     | 4         | 30/1233           | 3                     | 1   | 0   | 0   | 3                       | 1                       | 3                        | 1                        | 3.00            | 1.099               | 0.275   |         |
| 780 | IPI00010438 | SNAP23      | Isoform SNAP-23a of Synaptosomal-associated protein 23                       | Non-raft | 9         | 130/211           | 9                     | 0   | 9   | 0   | 18                      | 0                       | 47                       | 1                        | 47.00           | 3.850               | 0.000   | H       |
|     | IPI00010438 | SNAP23      | Isoform SNAP-23a of Synaptosomal-associated protein 23                       | Raft     | 15        | 179/211           | 22                    | 1   | 7   | 0   | 29                      | 1                       |                          |                          |                 |                     |         |         |
| 781 | IPI00140420 | SND1        | Staphylococcal nuclease domain-containing protein 1                          | Non-raft | 10        | 148/910           | 6                     | 8   | 6   | 4   | 12                      | 12                      | 38                       | 28                       | 1.36            | 0.305               | 0.670   |         |
|     | IPI00140420 | SND1        | Staphylococcal nuclease domain-containing protein 1                          | Raft     | 24        | 322/910           | 19                    | 14  | 7   | 2   | 26                      | 16                      |                          |                          |                 |                     |         |         |
| 782 | IPI00009505 | SNTB2       | Isoform 1 of Beta-2-syntrophin                                               | Non-raft | 2         | 23/540            | 1                     | 1   | 1   | 0   | 2                       | 1                       | 2                        | 1                        | 2.00            | 0.693               | 0.473   |         |
| 783 | IPI00472939 | SPCS2       | Signal peptidase complex subunit 2                                           | Non-raft | 2         | 21/227            | 2                     | 0   | 0   | 0   | 2                       | 0                       | 2                        | 0                        | 2.00            | 0.693               | 0.473   |         |
| 784 | IPI00300299 | SPCS3       | Signal peptidase complex subunit 3                                           | Non-raft | 2         | 21/180            | 0                     | 1   | 1   | 0   | 1                       | 1                       | 1                        | 1                        | 1.00            | 0.000               | 0.799   |         |
| 785 | IPI00012913 | SPRY2       | SPRY2 protein                                                                | Non-raft | 2         | 28/353            | 2                     | 0   | 1   | 0   | 3                       | 0                       | 3                        | 0                        | 3.00            | 1.099               | 0.275   |         |
| 786 | IPI00413728 | SPTAN1      | Isoform 1 of Spectrin alpha chain, brain                                     | Raft     | 10        | 132/2472          | 10                    | 4   | 1   | 0   | 11                      | 4                       | 11                       | 4                        | 2.75            | 1.012               | 0.315   |         |
| 787 | IPI00005745 | SPTLC1      | Serine palmitoyltransferase 1                                                | Non-raft | 4         | 55/473            | 5                     | 1   | 1   | 1   | 6                       | 2                       | 6                        | 2                        | 3.00            | 1.099               | 0.275   |         |
| 788 | IPI00009634 | SQRDL       | Sulfide:quinone oxidoreductase, mitochondrial precursor                      | Non-raft | 2         | 24/450            | 2                     | 1   | 2   | 1   | 4                       | 2                       | 4                        | 2                        | 2.00            | 0.693               | 0.473   |         |
| 789 | IPI00179473 | SQSTM1      | 48 kDa protein                                                               | Non-raft | 4         | 72/440            | 6                     | 4   | 2   | 2   | 8                       | 6                       | 29                       | 26                       | 1.12            | 0.109               | 0.757   |         |
|     | IPI00179473 | SQSTM1      | 48 kDa protein                                                               | Raft     | 8         | 175/440           | 16                    | 16  | 5   | 4   | 21                      | 20                      |                          |                          |                 |                     |         |         |
| 790 | IPI00102936 | SRP68       | Isoform 2 of Signal recognition particle 68 kDa protein                      | Non-raft | 4         | 67/596            | 2                     | 2   | 1   | 1   | 3                       | 3                       | 3                        | 3                        | 1.00            | 0.000               | 0.799   |         |
| 791 | IPI00290439 | SRPK1       | Isoform 1 of Serine/threonine-protein kinase SRPK1                           | Raft     | 2         | 18/826            | 1                     | 1   | 0   | 0   | 1                       | 1                       | 1                        | 1                        | 1.00            | 0.000               | 0.799   |         |
| 792 | IPI00019385 | SSR4        | Hypothetical protein SSR4 (Fragment)                                         | Non-raft | 3         | 31/184            | 3                     | 1   | 1   | 1   | 4                       | 2                       | 4                        | 2                        | 2.00            | 0.693               | 0.473   |         |
| 793 | IPI00012434 | STARD3NL    | Isoform 1 of MLN64 N-terminal domain homolog                                 | Non-raft | 4         | 46/234            | 6                     | 0   | 1   | 0   | 7                       | 0                       | 7                        | 0                        | 7.00            | 1.946               | 0.044   |         |
| 794 | IPI00005846 | STEAP1      | Six transmembrane epithelial antigen of prostate 1                           | Non-raft | 2         | 21/486            | 1                     | 0   | 1   | 0   | 2                       | 0                       | 2                        | 0                        | 2.00            | 0.693               | 0.473   |         |
| 795 | IPI00013894 | STIP1       | Stress-induced-phosphoprotein 1                                              | Non-raft | 5         | 62/543            | 2                     | 3   | 1   | 1   | 3                       | 4                       | 3                        | 4                        | 0.75            | -0.288              | 0.888   |         |
| 796 | IPI00219682 | STOM        | Erythrocyte band 7 integral membrane protein                                 | Non-raft | 13        | 140/288           | 19                    | 2   | 28  | 0   | 47                      | 2                       | 103                      | 2                        | 51.50           | 3.942               | 0.000   | H       |
|     | IPI00219682 | STOM        | Erythrocyte band 7 integral membrane protein                                 | Raft     | 15        | 188/288           | 34                    | 0   | 22  | 0   | 56                      | 0                       |                          |                          |                 |                     |         |         |
| 797 | IPI00334190 | STOML2      | Stomatin-like protein 2                                                      | Non-raft | 6         | 118/356           | 6                     | 1   | 0   | 0   | 6                       | 1                       | 6                        | 1                        | 6.00            | 1.792               | 0.067   | M       |
| 798 | IPI00294536 | STRAP       | Serine-threonine kinase receptor-associated protein                          | Non-raft | 2         | 33/363            | 1                     | 1   | 0   | 0   | 1                       | 1                       | 1                        | 1                        | 1.00            | 0.000               | 0.799   |         |
| 799 | IPI00297492 | STT3A       | Dolichyl-diphosphooligosaccharide--protein glycosyltransferase subunit STT3A | Non-raft | 5         | 57/705            | 4                     | 3   | 0   | 1   | 4                       | 4                       | 4                        | 4                        | 1.00            | 0.000               | 0.799   |         |
| 800 | IPI00293402 | STX10       | Syntaxin-10                                                                  | Non-raft | 2         | 39/249            | 2                     | 0   | 0   | 0   | 2                       | 0                       | 4                        | 0                        | 4.00            | 1.386               | 0.165   | H       |
|     | IPI00293402 | STX10       | Syntaxin-10                                                                  | Raft     | 2         | 41/249            | 2                     | 0   | 0   | 0   | 2                       | 0                       |                          |                          |                 |                     |         |         |
| 801 | IPI00026128 | STX11       | Syntaxin-11                                                                  | Non-raft | 2         | 18/287            | 2                     | 0   | 0   | 0   | 2                       | 0                       | 2                        | 0                        | 2.00            | 0.693               | 0.473   |         |
| 802 | IPI00013930 | STX6        | Syntaxin-6                                                                   | Non-raft | 4         | 83/255            | 4                     | 0   | 2   | 0   | 6                       | 0                       | 9                        | 0                        | 9.00            | 2.197               | 0.021   | H       |
|     | IPI00013930 | STX6        | Syntaxin-6                                                                   | Raft     | 3         | 51/255            | 2                     | 0   | 1   | 0   | 3                       | 0                       |                          |                          |                 |                     |         |         |
| 803 | IPI00289876 | STX7        | syntaxin 7                                                                   | Non-raft | 2         | 29/261            | 1                     | 0   | 2   | 0   | 3                       | 0                       | 3                        | 0                        | 3.00            | 1.099               | 0.275   | M       |
| 804 | IPI00009225 | STX8        | Syntaxin-8                                                                   | Non-raft | 7         | 91/236            | 7                     | 0   | 7   | 0   | 14                      | 0                       | 21                       | 0                        | 21.00           | 3.045               | 0.001   | H       |
|     | IPI00009225 | STX8        | Syntaxin-8                                                                   | Raft     | 4         | 60/236            | 5                     | 0   | 2   | 0   | 7                       | 0                       |                          |                          |                 |                     |         |         |
| 805 | IPI00297626 | STXBP3      | Syntaxin-binding protein 3                                                   | Non-raft | 4         | 55/592            | 5                     | 1   | 1   | 0   | 6                       | 1                       | 6                        | 1                        | 6.00            | 1.792               | 0.067   |         |
| 806 | IPI00399142 | SURF4       | Surfeit 4                                                                    | Non-raft | 7         | 75/188            | 13                    | 0   | 11  | 0   | 24                      | 0                       | 24                       | 0                        | 24.00           | 3.178               | 0.000   | H       |
| 807 | IPI00021302 | SUSD2       | Sushi domain-containing protein 2 precursor                                  | Non-raft | 5         | 71/822            | 2                     | 4   | 1   | 0   | 3                       | 4                       | 3                        | 4                        | 0.75            | -0.288              | 0.888   |         |
| 808 | IPI00018140 | SYNCRIP     | Isoform 1 of Heterogeneous nuclear ribonucleoprotein Q                       | Non-raft | 3         | 34/623            | 2                     | 2   | 1   | 0   | 3                       | 2                       | 12                       | 10                       | 1.20            | 0.182               | 0.726   |         |
|     | IPI00018140 | SYNCRIP     | Isoform 1 of Heterogeneous nuclear ribonucleoprotein Q                       | Raft     | 5         | 57/623            | 6                     | 5   | 3   | 3   | 9                       | 8                       |                          |                          |                 |                     |         |         |
| 809 | IPI00297910 | TACSTD2     | Tumor-associated calcium signal transducer 2 precursor                       | Non-raft | 3         | 38/323            | 3                     | 4   | 0   | 0   | 3                       | 4                       | 3                        | 4                        | 0.75            | -0.288              | 0.888   |         |
| 810 | IPI00550363 | TAGLN2      | Transgelin-2                                                                 | Non-raft | 4         | 65/199            | 2                     | 0   | 1   | 1   | 3                       | 1                       | 3                        | 1                        | 3.00            | 1.099               | 0.275   |         |
| 811 | IPI00002232 | TAOK1       | Isoform 1 of Serine/threonine-protein kinase TAO1                            | Raft     | 2         | 21/1001           | 1                     | 2   | 0   | 0   | 1                       | 2                       | 1                        | 2                        | 0.50            | -0.693              | 0.959   |         |
| 812 | IPI00646625 | TAP1        | transporter 1, ATP-binding cassette, sub-family B                            | Non-raft | 3         | 51/808            | 3                     | 0   | 1   | 0   | 4                       | 0                       | 4                        | 0                        | 4.00            | 1.386               | 0.165   | H       |
| 813 | IPI00001382 | TAP2        | transporter 2, ATP-binding cassette, sub-family B isoform 2                  | Non-raft | 2         | 19/653            | 1                     | 0   | 1   | 0   | 2                       | 0                       | 2                        | 0                        | 2.00            | 0.693               | 0.473   |         |
| 814 | IPI00329633 | TARS        | Theonyl-tRNA synthetase, cytoplasmic                                         | Non-raft | 10        | 123/723           | 9                     | 4   | 1   | 2   | 10                      | 6                       | 10                       | 6                        | 1.67            | 0.511               | 0.568   |         |
| 815 | IPI00333215 | TCEA1       | Isoform 1 of Transcription elongation factor A protein 1                     | Non-raft | 2         | 26/301            | 2                     | 0   | 0   | 0   | 2                       | 0                       | 2                        | 0                        | 2.00            | 0.693               | 0.473   |         |



| No. | Acc.Number  | Gene Symbol | Description                                                                     | Fraction | Uni. Pep. | Sequence Coverage | Biological Replicates |     |     |     | Total EXP Each Fraction | Total CON Each Fraction | Total EXP Both Fractions | Total CON Both Fractions | EXP/CON Imputed | Ln(EXP/CON imputed) | P-value | 17-ODYA |
|-----|-------------|-------------|---------------------------------------------------------------------------------|----------|-----------|-------------------|-----------------------|-----|-----|-----|-------------------------|-------------------------|--------------------------|--------------------------|-----------------|---------------------|---------|---------|
|     |             |             |                                                                                 |          |           |                   | 1st                   |     | 2nd |     |                         |                         |                          |                          |                 |                     |         |         |
|     |             |             |                                                                                 |          |           |                   | EXP                   | CON | EXP | CON |                         |                         |                          |                          |                 |                     |         |         |
| 816 | IPI00290566 | TCP1        | T-complex protein 1 subunit alpha                                               | Non-raft | 12        | 180/556           | 11                    | 5   | 5   | 0   | 16                      | 5                       | 16                       | 5                        | 3.20            | 1.163               | 0.248   |         |
| 817 | IPI00022462 | TFRC        | Transferrin receptor protein 1                                                  | Non-raft | 43        | 453/760           | 87                    | 10  | 51  | 4   | 138                     | 14                      | 182                      | 17                       | 10.71           | 2.371               | 0.012   | H       |
|     | IPI00022462 | TFRC        | Transferrin receptor protein 1                                                  | Raft     | 20        | 266/760           | 28                    | 0   | 16  | 3   | 44                      | 3                       |                          |                          |                 |                     |         |         |
| 818 | IPI00294578 | TGM2        | Isoform 1 of Protein-glutamine gamma-glutamyltransferase 2                      | Non-raft | 13        | 206/687           | 14                    | 14  | 7   | 8   | 21                      | 22                      | 21                       | 22                       | 0.95            | -0.047              | 0.816   |         |
| 819 | IPI00300376 | TGM3        | Protein-glutamine gamma-glutamyltransferase E precursor                         | Non-raft | 4         | 71/693            | 0                     | 4   | 0   | 1   | 0                       | 5                       | 1                        | 6                        | 0.17            | -1.792              | 0.999   |         |
|     | IPI00300376 | TGM3        | Protein-glutamine gamma-glutamyltransferase E precursor                         | Raft     | 2         | 26/693            | 1                     | 1   | 0   | 0   | 1                       | 1                       |                          |                          |                 |                     |         |         |
| 820 | IPI00010737 | THBD        | Thrombomodulin precursor                                                        | Non-raft | 2         | 21/575            | 2                     | 0   | 0   | 0   | 2                       | 0                       | 2                        | 0                        | 2.00            | 0.693               | 0.473   |         |
| 821 | IPI00296099 | THBS1       | Thrombospondin-1 precursor                                                      | Non-raft | 3         | 38/1170           | 0                     | 3   | 0   | 0   | 0                       | 3                       | 0                        | 3                        | 0.33            | -1.099              | 0.988   |         |
| 822 | IPI00305374 | THOC1       | THO complex subunit 1                                                           | Raft     | 10        | 127/657           | 8                     | 6   | 1   | 0   | 9                       | 6                       | 9                        | 6                        | 1.50            | 0.405               | 0.621   |         |
| 823 | IPI00063729 | THOC3       | THO complex subunit 3                                                           | Raft     | 2         | 20/378            | 1                     | 1   | 1   | 0   | 2                       | 1                       | 2                        | 1                        | 2.00            | 0.693               | 0.473   |         |
| 824 | IPI00301252 | THOC6       | Isoform 3 of THO complex subunit 6 homolog                                      | Raft     | 7         | 108/296           | 5                     | 3   | 1   | 1   | 6                       | 4                       | 6                        | 4                        | 1.50            | 0.405               | 0.621   |         |
| 825 | IPI00306516 | TIMM44      | Import inner membrane translocase subunit TIM44, mitochondrial precursor        | Non-raft | 2         | 25/452            | 2                     | 0   | 0   | 0   | 2                       | 0                       | 2                        | 0                        | 2.00            | 0.693               | 0.473   |         |
| 826 | IPI00643920 | TKT         | Transketolase                                                                   | Non-raft | 11        | 141/631           | 8                     | 8   | 6   | 2   | 14                      | 10                      | 14                       | 10                       | 1.40            | 0.336               | 0.655   |         |
| 827 | IPI00298994 | TLN1        | 271 kDa protein                                                                 | Non-raft | 8         | 125/2541          | 2                     | 5   | 1   | 2   | 3                       | 7                       | 6                        | 7                        | 0.86            | -0.154              | 0.851   |         |
|     | IPI00298994 | TLN1        | 271 kDa protein                                                                 | Raft     | 3         | 45/2541           | 3                     | 0   | 0   | 0   | 3                       | 0                       |                          |                          |                 |                     |         |         |
| 828 | IPI00021985 | TM9SF4      | Transmembrane 9 superfamily protein member 4                                    | Non-raft | 2         | 33/642            | 2                     | 0   | 0   | 0   | 2                       | 0                       | 2                        | 0                        | 2.00            | 0.693               | 0.473   |         |
| 829 | IPI00009976 | TMED1       | Transmembrane emp24 domain-containing protein 1 precursor                       | Non-raft | 4         | 48/227            | 5                     | 0   | 2   | 0   | 7                       | 0                       | 7                        | 0                        | 7.00            | 1.946               | 0.044   | M       |
| 830 | IPI00028055 | TMED10      | Transmembrane emp24 domain-containing protein 10 precursor                      | Non-raft | 2         | 21/219            | 2                     | 0   | 0   | 0   | 2                       | 0                       | 2                        | 0                        | 2.00            | 0.693               | 0.473   |         |
| 831 | IPI00170706 | TMEM2       | Transmembrane protein 2                                                         | Non-raft | 10        | 128/1383          | 9                     | 4   | 4   | 0   | 13                      | 4                       | 13                       | 4                        | 3.25            | 1.179               | 0.242   |         |
| 832 | IPI00299084 | TMEM33      | Transmembrane protein 33                                                        | Non-raft | 3         | 38/247            | 4                     | 1   | 4   | 2   | 8                       | 3                       | 8                        | 3                        | 2.67            | 0.981               | 0.329   |         |
| 833 | IPI00000612 | TMEM50A     | Transmembrane protein 50A                                                       | Raft     | 2         | 19/157            | 7                     | 0   | 2   | 0   | 9                       | 0                       | 9                        | 0                        | 9.00            | 2.197               | 0.021   |         |
| 834 | IPI00030530 | TMEM55B     | Isoform 1 of Transmembrane protein 55B                                          | Non-raft | 2         | 33/277            | 2                     | 0   | 0   | 0   | 2                       | 0                       | 6                        | 0                        | 6.00            | 1.792               | 0.067   | M       |
|     | IPI00030530 | TMEM55B     | Isoform 1 of Transmembrane protein 55B                                          | Raft     | 4         | 54/277            | 4                     | 0   | 0   | 0   | 4                       | 0                       |                          |                          |                 |                     |         |         |
| 835 | IPI00399320 | TMEM59      | Transmembrane protein 59                                                        | Non-raft | 2         | 26/323            | 2                     | 0   | 2   | 0   | 4                       | 0                       | 7                        | 0                        | 7.00            | 1.946               | 0.044   |         |
|     | IPI00399320 | TMEM59      | Transmembrane protein 59                                                        | Raft     | 2         | 28/323            | 2                     | 0   | 1   | 0   | 3                       | 0                       |                          |                          |                 |                     |         |         |
| 836 | IPI00006006 | TMEM63A     | Transmembrane protein 63A                                                       | Non-raft | 5         | 49/807            | 4                     | 0   | 1   | 0   | 5                       | 0                       | 5                        | 0                        | 5.00            | 1.609               | 0.103   | M       |
| 837 | IPI00514538 | TMEM63B     | transmembrane protein 63B                                                       | Non-raft | 4         | 43/832            | 2                     | 0   | 2   | 0   | 4                       | 0                       | 9                        | 0                        | 9.00            | 2.197               | 0.021   |         |
|     | IPI00514538 | TMEM63B     | transmembrane protein 63B                                                       | Raft     | 5         | 54/832            | 5                     | 0   | 0   | 0   | 5                       | 0                       |                          |                          |                 |                     |         |         |
| 838 | IPI00216230 | TMPO        | Lamina-associated polypeptide 2 isoform alpha                                   | Raft     | 6         | 101/694           | 3                     | 4   | 0   | 0   | 3                       | 4                       | 3                        | 4                        | 0.75            | -0.288              | 0.888   |         |
| 839 | IPI00304866 | TNFAIP2     | Tumor necrosis factor, alpha-induced protein 2                                  | Non-raft | 6         | 78/654            | 5                     | 0   | 2   | 0   | 7                       | 0                       | 7                        | 0                        | 7.00            | 1.946               | 0.044   |         |
| 840 | IPI00021975 | TNFRSF10A   | Tumor necrosis factor receptor superfamily member 10A precursor                 | Non-raft | 8         | 99/468            | 18                    | 1   | 15  | 0   | 33                      | 1                       | 35                       | 1                        | 35.00           | 3.555               | 0.000   |         |
|     | IPI00021975 | TNFRSF10A   | Tumor necrosis factor receptor superfamily member 10A precursor                 | Raft     | 2         | 26/468            | 2                     | 0   | 0   | 0   | 2                       | 0                       |                          |                          |                 |                     |         |         |
| 841 | IPI00296379 | TNFRSF10B   | Isoform Long of Tumor necrosis factor receptor superfamily member 10B precursor | Non-raft | 5         | 85/440            | 10                    | 1   | 6   | 0   | 16                      | 1                       | 27                       | 1                        | 27.00           | 3.296               | 0.000   |         |
|     | IPI00296379 | TNFRSF10B   | Isoform Long of Tumor necrosis factor receptor superfamily member 10B precursor | Raft     | 5         | 79/440            | 6                     | 0   | 5   | 0   | 11                      | 0                       |                          |                          |                 |                     |         |         |
| 842 | IPI00294516 | TNFRSF10D   | Tumor necrosis factor receptor superfamily member 10D precursor                 | Non-raft | 2         | 41/386            | 5                     | 0   | 1   | 0   | 6                       | 0                       | 6                        | 0                        | 6.00            | 1.792               | 0.067   |         |
| 843 | IPI00304589 | TNKS1BP1    | 182 kDa tankyrase 1-binding protein                                             | Raft     | 5         | 85/1729           | 2                     | 3   | 0   | 0   | 2                       | 3                       | 2                        | 3                        | 0.67            | -0.405              | 0.914   |         |
| 844 | IPI00169434 | TNRC15      | Hypothetical protein DKFZp686O20169                                             | Raft     | 2         | 33/1299           | 1                     | 2   | 0   | 0   | 1                       | 2                       | 1                        | 2                        | 0.50            | -0.693              | 0.959   |         |
| 845 | IPI00014053 | TOMM40      | Isoform 1 of Probable mitochondrial import receptor subunit TOM40 homolog       | Non-raft | 2         | 17/361            | 2                     | 0   | 1   | 0   | 3                       | 0                       | 3                        | 0                        | 3.00            | 1.099               | 0.275   | H       |
| 846 | IPI00015602 | TOMM70A     | Mitochondrial precursor proteins import receptor                                | Non-raft | 4         | 49/608            | 4                     | 3   | 1   | 1   | 5                       | 4                       | 5                        | 4                        | 1.25            | 0.223               | 0.708   |         |
| 847 | IPI00009111 | TPBG        | Trophoblast glycoprotein precursor                                              | Non-raft | 8         | 100/420           | 16                    | 2   | 10  | 1   | 26                      | 3                       | 28                       | 3                        | 9.33            | 2.234               | 0.019   |         |
|     | IPI00009111 | TPBG        | Trophoblast glycoprotein precursor                                              | Raft     | 2         | 33/420            | 0                     | 0   | 2   | 0   | 2                       | 0                       |                          |                          |                 |                     |         |         |
| 848 | IPI00465028 | TPI1        | Triosephosphate isomerase 1 variant                                             | Non-raft | 13        | 165/286           | 14                    | 9   | 3   | 1   | 17                      | 10                      | 17                       | 10                       | 1.70            | 0.531               | 0.558   |         |
| 849 | IPI00178083 | TPM3        | 29 kDa protein                                                                  | Non-raft | 5         | 42/224            | 4                     | 4   | 0   | 1   | 4                       | 5                       | 7                        | 6                        | 1.17            | 0.154               | 0.738   |         |
|     | IPI00178083 | TPM3        | 29 kDa protein                                                                  | Raft     | 3         | 34/224            | 2                     | 1   | 1   | 0   | 3                       | 1                       |                          |                          |                 |                     |         |         |

| No. | Acc.Number  | Gene Symbol | Description                                                   | Fraction | Uni. Pep. | Sequence Coverage | Biological Replicates |     |     |     | Total EXP Each Fraction | Total CON Each Fraction | Total EXP Both Fractions | Total CON Both Fractions | EXP/CON Imputed | Ln(EXP/CON imputed) | P-value | 17-ODYA |
|-----|-------------|-------------|---------------------------------------------------------------|----------|-----------|-------------------|-----------------------|-----|-----|-----|-------------------------|-------------------------|--------------------------|--------------------------|-----------------|---------------------|---------|---------|
|     |             |             |                                                               |          |           |                   | 1st                   |     | 2nd |     |                         |                         |                          |                          |                 |                     |         |         |
|     |             |             |                                                               |          |           |                   | EXP                   | CON | EXP | CON |                         |                         |                          |                          |                 |                     |         |         |
| 850 | IPI00030275 | TRAP1       | Heat shock protein 75 kDa, mitochondrial precursor            | Non-raft | 6         | 78/704            | 4                     | 6   | 2   | 3   | 6                       | 9                       | 6                        | 9                        | 0.67            | -0.405              | 0.914   | H       |
| 851 | IPI00004324 | TRAPPC3     | Trafficking protein particle complex subunit 3                | Non-raft | 3         | 36/180            | 4                     | 0   | 8   | 0   | 12                      | 0                       | 19                       | 0                        | 19.00           | 2.944               | 0.001   |         |
|     | IPI00004324 | TRAPPC3     | Trafficking protein particle complex subunit 3                | Raft     | 3         | 36/180            | 5                     | 0   | 2   | 0   | 7                       | 0                       |                          |                          |                 |                     |         |         |
| 852 | IPI00029629 | TRIM25      | Tripartite motif-containing protein 25                        | Non-raft | 4         | 54/630            | 3                     | 2   | 2   | 1   | 5                       | 3                       | 16                       | 9                        | 1.78            | 0.575               | 0.535   |         |
|     | IPI00029629 | TRIM25      | Tripartite motif-containing protein 25                        | Raft     | 9         | 119/630           | 8                     | 5   | 3   | 1   | 11                      | 6                       |                          |                          |                 |                     |         |         |
| 853 | IPI00438229 | TRIM28      | tripartite motif-containing 28 protein                        | Non-raft | 6         | 84/835            | 2                     | 2   | 0   | 2   | 2                       | 4                       | 3                        | 5                        | 0.60            | -0.511              | 0.934   |         |
|     | IPI00438229 | TRIM28      | tripartite motif-containing 28 protein                        | Raft     | 2         | 23/835            | 1                     | 1   | 0   | 0   | 1                       | 1                       |                          |                          |                 |                     |         |         |
| 854 | IPI00165394 | TSPAN14     | Isoform 2 of Tetraspanin-14                                   | Non-raft | 2         | 28/253            | 1                     | 0   | 3   | 0   | 4                       | 0                       | 4                        | 0                        | 4.00            | 1.386               | 0.165   |         |
| 855 | IPI00000736 | TSPAN15     | Tetraspanin-15                                                | Non-raft | 2         | 32/294            | 2                     | 0   | 0   | 0   | 2                       | 0                       | 2                        | 0                        | 2.00            | 0.693               | 0.473   |         |
| 856 | IPI00024174 | TSPAN4      | Tetraspanin-4                                                 | Non-raft | 2         | 33/238            | 3                     | 0   | 0   | 0   | 3                       | 0                       | 3                        | 0                        | 3.00            | 1.099               | 0.275   |         |
| 857 | IPI00027437 | TSPAN9      | Tetraspanin-9                                                 | Non-raft | 2         | 29/239            | 2                     | 0   | 3   | 0   | 5                       | 0                       | 5                        | 0                        | 5.00            | 1.609               | 0.103   |         |
| 858 | IPI00023283 | TTN         | Isoform 2 of Titin                                            | Raft     | 2         | 17/34258          | 2                     | 0   | 0   | 0   | 2                       | 0                       | 2                        | 0                        | 2.00            | 0.693               | 0.473   | M       |
| 859 | IPI00877061 | TTYH3       | Isoform 3 of protein tweety homolog 3                         | Non-raft | 2         | 29/352            | 5                     | 0   | 5   | 0   | 10                      | 0                       | 10                       | 0                        | 10.00           | 2.303               | 0.015   |         |
| 860 | IPI00180675 | TUBA1A      | Tubulin alpha-3 chain                                         | Non-raft | 16        | 219/451           | 11                    | 8   | 10  | 10  | 21                      | 18                      | 21                       | 18                       | 1.17            | 0.154               | 0.738   |         |
| 861 | IPI00387144 | TUBA1B      | Tubulin alpha-ubiquitous chain                                | Non-raft | 17        | 233/451           | 17                    | 14  | 15  | 14  | 32                      | 28                      | 48                       | 36                       | 1.33            | 0.288               | 0.678   |         |
|     | IPI00387144 | TUBA1B      | Tubulin alpha-ubiquitous chain                                | Raft     | 8         | 127/451           | 11                    | 6   | 5   | 2   | 16                      | 8                       |                          |                          |                 |                     |         |         |
| 862 | IPI00218343 | TUBA1C      | Tubulin alpha-6 chain                                         | Non-raft | 16        | 216/449           | 15                    | 13  | 15  | 12  | 30                      | 25                      | 42                       | 31                       | 1.35            | 0.304               | 0.671   |         |
|     | IPI00218343 | TUBA1C      | Tubulin alpha-6 chain                                         | Raft     | 5         | 84/449            | 7                     | 4   | 5   | 2   | 12                      | 6                       |                          |                          |                 |                     |         |         |
| 863 | IPI00007750 | TUBA4A      | Tubulin alpha-1 chain                                         | Non-raft | 11        | 160/448           | 15                    | 8   | 0   | 0   | 15                      | 8                       | 15                       | 8                        | 1.88            | 0.629               | 0.507   |         |
| 864 | IPI00646909 | TUBA8       | Tubulin alpha-8 chain                                         | Non-raft | 9         | 130/449           | 10                    | 7   | 11  | 6   | 21                      | 13                      | 21                       | 13                       | 1.62            | 0.480               | 0.584   |         |
| 865 | IPI00011654 | TUBB        | Tubulin beta-2 chain                                          | Non-raft | 20        | 293/444           | 20                    | 19  | 17  | 11  | 37                      | 30                      | 51                       | 46                       | 1.11            | 0.103               | 0.759   |         |
|     | IPI00011654 | TUBB        | Tubulin beta-2 chain                                          | Raft     | 12        | 165/444           | 7                     | 10  | 7   | 6   | 14                      | 16                      |                          |                          |                 |                     |         |         |
| 866 | IPI00013475 | TUBB2A      | tubulin, beta 2                                               | Non-raft | 16        | 127/445           | 11                    | 10  | 11  | 8   | 22                      | 18                      | 22                       | 18                       | 1.22            | 0.201               | 0.718   |         |
| 867 | IPI00007752 | TUBB2C      | Tubulin beta-2C chain                                         | Non-raft | 19        | 283/445           | 18                    | 17  | 13  | 10  | 31                      | 27                      | 31                       | 27                       | 1.15            | 0.138               | 0.745   |         |
| 868 | IPI00013683 | TUBB3       | Tubulin beta-3 chain                                          | Non-raft | 7         | 71/450            | 6                     | 9   | 0   | 0   | 6                       | 9                       | 6                        | 9                        | 0.67            | -0.405              | 0.914   |         |
| 869 | IPI00641706 | TUBB6       | 46 kDa protein                                                | Non-raft | 7         | 76/409            | 5                     | 4   | 0   | 0   | 5                       | 4                       | 5                        | 4                        | 1.25            | 0.223               | 0.708   |         |
| 870 | IPI00027107 | TUFM        | Tu translation elongation factor, mitochondrial               | Non-raft | 3         | 38/455            | 3                     | 1   | 1   | 1   | 4                       | 2                       | 4                        | 2                        | 2.00            | 0.693               | 0.473   | M       |
| 871 | IPI00470779 | TXLNA       | Alpha-taxilin                                                 | Raft     | 3         | 38/546            | 3                     | 0   | 0   | 0   | 3                       | 0                       | 3                        | 0                        | 3.00            | 1.099               | 0.275   |         |
| 872 | IPI00395887 | TXNDC1      | Thioredoxin domain-containing protein 1 precursor             | Non-raft | 10        | 102/280           | 21                    | 3   | 30  | 2   | 51                      | 5                       | 68                       | 5                        | 13.60           | 2.610               | 0.005   | H       |
|     | IPI00395887 | TXNDC1      | Thioredoxin domain-containing protein 1 precursor             | Raft     | 7         | 73/280            | 8                     | 0   | 9   | 0   | 17                      | 0                       |                          |                          |                 |                     |         |         |
| 873 | IPI00064193 | TXNDC10     | Isoform 1 of Protein disulfide-isomerase TXNDC10 precursor    | Non-raft | 8         | 131/454           | 6                     | 1   | 8   | 0   | 14                      | 1                       | 14                       | 1                        | 14.00           | 2.639               | 0.005   | H       |
| 874 | IPI00329596 | TXNDC14     | CDNA PSEC0045 fis, clone NT2RP1001023                         | Non-raft | 2         | 27/371            | 2                     | 0   | 1   | 1   | 3                       | 1                       | 3                        | 1                        | 3.00            | 1.099               | 0.275   |         |
| 875 | IPI00171438 | TXNDC5      | Thioredoxin domain-containing protein 5 precursor             | Non-raft | 3         | 34/432            | 3                     | 2   | 1   | 1   | 4                       | 3                       | 5                        | 5                        | 1.00            | 0.000               | 0.799   |         |
|     | IPI00171438 | TXNDC5      | Thioredoxin domain-containing protein 5 precursor             | Raft     | 3         | 19/432            | 1                     | 0   | 0   | 2   | 1                       | 2                       |                          |                          |                 |                     |         |         |
| 876 | IPI00554786 | TXNRD1      | Thioredoxin reductase 1, cytoplasmic precursor                | Non-raft | 13        | 185/499           | 10                    | 6   | 6   | 4   | 16                      | 10                      | 16                       | 10                       | 1.60            | 0.470               | 0.589   |         |
| 877 | IPI00157820 | TXNRD2      | Isoform 2 of Thioredoxin reductase 2, mitochondrial precursor | Non-raft | 2         | 30/522            | 3                     | 0   | 0   | 0   | 3                       | 0                       | 3                        | 0                        | 3.00            | 1.099               | 0.275   |         |
| 878 | IPI00000684 | UAP1        | Isoform AGX2 of UDP-N-acetylhexosamine pyrophosphorylase      | Non-raft | 2         | 26/522            | 1                     | 1   | 0   | 0   | 1                       | 1                       | 1                        | 1                        | 1.00            | 0.000               | 0.799   |         |
| 879 | IPI00645078 | UBA1        | Ubiquitin-activating enzyme E1                                | Non-raft | 22        | 373/1058          | 22                    | 5   | 12  | 1   | 34                      | 6                       | 34                       | 6                        | 5.67            | 1.735               | 0.077   |         |
| 880 | IPI00023234 | UBA2        | Ubiquitin-like 1-activating enzyme E1B                        | Non-raft | 5         | 66/640            | 4                     | 0   | 1   | 0   | 5                       | 0                       | 5                        | 0                        | 5.00            | 1.609               | 0.103   |         |
| 881 | IPI00003949 | UBE2N       | Ubiquitin-conjugating enzyme E2 N                             | Non-raft | 2         | 30/152            | 2                     | 0   | 2   | 0   | 4                       | 0                       | 6                        | 0                        | 6.00            | 1.792               | 0.067   |         |
|     | IPI00003949 | UBE2N       | Ubiquitin-conjugating enzyme E2 N                             | Raft     | 2         | 30/152            | 2                     | 0   | 0   | 0   | 2                       | 0                       |                          |                          |                 |                     |         |         |
| 882 | IPI00026669 | UBL3        | Ubiquitin-like protein 3 precursor                            | Non-raft | 3         | 26/117            | 4                     | 0   | 2   | 0   | 6                       | 0                       | 6                        | 0                        | 6.00            | 1.792               | 0.067   |         |
| 883 | IPI00017227 | UBTD1       | Ubiquitin domain-containing protein 1                         | Non-raft | 3         | 35/227            | 2                     | 0   | 1   | 0   | 3                       | 0                       | 15                       | 0                        | 15.00           | 2.708               | 0.003   |         |
|     | IPI00017227 | UBTD1       | Ubiquitin domain-containing protein 1                         | Raft     | 8         | 79/227            | 9                     | 0   | 3   | 0   | 12                      | 0                       |                          |                          |                 |                     |         |         |
| 884 | IPI00157729 | UBTD2       | Ubiquitin domain-containing protein 2                         | Raft     | 3         | 35/234            | 3                     | 0   | 0   | 0   | 3                       | 0                       | 3                        | 0                        | 3.00            | 1.099               | 0.275   |         |
| 885 | IPI00172656 | UBXD8       | UBX domain-containing protein 8                               | Non-raft | 4         | 59/445            | 2                     | 1   | 3   | 2   | 5                       | 3                       | 5                        | 3                        | 1.67            | 0.511               | 0.568   |         |
| 886 | IPI00018352 | UCHL1       | Ubiquitin carboxyl-terminal hydrolase isozyme L1              | Non-raft | 5         | 72/223            | 4                     | 0   | 3   | 0   | 7                       | 0                       | 7                        | 0                        | 7.00            | 1.946               | 0.044   |         |
| 887 | IPI00031420 | UGDH        | UDP-glucose 6-dehydrogenase                                   | Non-raft | 12        | 165/494           | 12                    | 5   | 5   | 4   | 17                      | 9                       | 17                       | 9                        | 1.89            | 0.636               | 0.503   |         |

| No. | Acc.Number  | Gene Symbol | Description                                                                              | Fraction | Uni. Pep. | Sequence Coverage | Biological Replicates |     |     |     | Total EXP Each Fraction | Total CON Each Fraction | Total EXP Both Fractions | Total CON Both Fractions | EXP/CON Imputed | Ln(EXP/CON imputed) | P-value | 17-ODYA |
|-----|-------------|-------------|------------------------------------------------------------------------------------------|----------|-----------|-------------------|-----------------------|-----|-----|-----|-------------------------|-------------------------|--------------------------|--------------------------|-----------------|---------------------|---------|---------|
|     |             |             |                                                                                          |          |           |                   | 1st                   |     | 2nd |     |                         |                         |                          |                          |                 |                     |         |         |
|     |             |             |                                                                                          |          |           |                   | EXP                   | CON | EXP | CON |                         |                         |                          |                          |                 |                     |         |         |
| 888 | IPI00034049 | UPF1        | Isoform 1 of Regulator of nonsense transcripts 1                                         | Raft     | 7         | 85/1129           | 7                     | 1   | 0   | 0   | 7                       | 1                       | 7                        | 1                        | 7.00            | 1.946               | 0.044   |         |
| 889 | IPI00004406 | UPP1        | Isoform 1 of Uridine phosphorylase 1                                                     | Non-raft | 2         | 30/310            | 2                     | 0   | 0   | 0   | 2                       | 0                       | 2                        | 0                        | 2.00            | 0.693               | 0.473   |         |
| 890 | IPI00013847 | UQCRC1      | Ubiquinol-cytochrome-c reductase complex core protein I, mitochondrial precursor         | Non-raft | 2         | 24/480            | 1                     | 2   | 0   | 0   | 1                       | 2                       | 1                        | 2                        | 0.50            | -0.693              | 0.959   |         |
| 891 | IPI00291946 | USP10       | Ubiquitin carboxyl-terminal hydrolase 10                                                 | Raft     | 6         | 105/798           | 4                     | 2   | 3   | 2   | 7                       | 4                       | 7                        | 4                        | 1.75            | 0.560               | 0.543   |         |
| 892 | IPI00219913 | USP14       | Ubiquitin carboxyl-terminal hydrolase 14                                                 | Non-raft | 2         | 24/494            | 1                     | 1   | 0   | 1   | 1                       | 2                       | 1                        | 2                        | 0.50            | -0.693              | 0.959   |         |
| 893 | IPI00549343 | VAMP3       | Vesicle-associated membrane protein 3                                                    | Non-raft | 9         | 77/100            | 14                    | 0   | 17  | 0   | 31                      | 0                       | 40                       | 0                        | 40.00           | 3.689               | 0.000   | H       |
|     | IPI00549343 | VAMP3       | Vesicle-associated membrane protein 3                                                    | Raft     | 5         | 41/100            | 5                     | 0   | 4   | 0   | 9                       | 0                       |                          |                          |                 |                     |         |         |
| 894 | IPI00219648 | VAMP4       | Isoform 2 of Vesicle-associated membrane protein 4                                       | Non-raft | 3         | 34/140            | 2                     | 0   | 3   | 0   | 5                       | 0                       | 5                        | 0                        | 5.00            | 1.609               | 0.103   | H       |
| 895 | IPI00013236 | VAMP7       | Isoform 2 of Synaptobrevin-like protein 1                                                | Non-raft | 7         | 109/260           | 3                     | 0   | 8   | 0   | 11                      | 0                       | 11                       | 0                        | 11.00           | 2.398               | 0.011   |         |
| 896 | IPI00031195 | VANGL1      | Isoform 1 of Vang-like protein 1                                                         | Non-raft | 8         | 139/524           | 7                     | 0   | 2   | 0   | 9                       | 0                       | 16                       | 0                        | 16.00           | 2.773               | 0.003   | H       |
|     | IPI00031195 | VANGL1      | Isoform 1 of Vang-like protein 1                                                         | Raft     | 6         | 99/524            | 4                     | 0   | 3   | 0   | 7                       | 0                       |                          |                          |                 |                     |         |         |
| 897 | IPI00170692 | VAPA        | vesicle-associated membrane protein-associated protein A isoform 2                       | Non-raft | 3         | 30/249            | 2                     | 1   | 1   | 0   | 3                       | 1                       | 5                        | 2                        | 2.50            | 0.916               | 0.360   | M       |
|     | IPI00170692 | VAPA        | vesicle-associated membrane protein-associated protein A isoform 2                       | Raft     | 2         | 14/249            | 2                     | 1   | 0   | 0   | 2                       | 1                       |                          |                          |                 |                     |         |         |
| 898 | IPI00006211 | VAPB        | VAMP-associated protein B/C                                                              | Non-raft | 2         | 28/243            | 1                     | 1   | 0   | 0   | 1                       | 1                       | 1                        | 1                        | 1.00            | 0.000               | 0.799   |         |
| 899 | IPI00000873 | VAR5        | Valyl-tRNA synthetase                                                                    | Non-raft | 9         | 121/1264          | 6                     | 4   | 2   | 2   | 8                       | 6                       | 8                        | 6                        | 1.33            | 0.288               | 0.678   |         |
| 900 | IPI00156689 | VAT1        | Synaptic vesicle membrane protein VAT-1 homolog                                          | Non-raft | 6         | 86/393            | 4                     | 3   | 1   | 2   | 5                       | 5                       | 5                        | 5                        | 1.00            | 0.000               | 0.799   |         |
| 901 | IPI00022774 | VCP         | Transitional endoplasmic reticulum ATPase                                                | Non-raft | 34        | 398/806           | 30                    | 31  | 21  | 16  | 51                      | 47                      | 53                       | 49                       | 1.08            | 0.078               | 0.769   |         |
|     | IPI00022774 | VCP         | Transitional endoplasmic reticulum ATPase                                                | Raft     | 3         | 37/806            | 2                     | 2   | 0   | 0   | 2                       | 2                       |                          |                          |                 |                     |         |         |
| 902 | IPI00216308 | VDAC1       | Voltage-dependent anion-selective channel protein 1                                      | Non-raft | 10        | 128/283           | 12                    | 10  | 4   | 6   | 16                      | 16                      | 16                       | 16                       | 1.00            | 0.000               | 0.799   |         |
| 903 | IPI00216026 | VDAC2       | Isoform 3 of Voltage-dependent anion-selective channel protein 2                         | Non-raft | 13        | 192/294           | 20                    | 12  | 10  | 7   | 30                      | 19                      | 32                       | 21                       | 1.52            | 0.421               | 0.613   |         |
|     | IPI00216026 | VDAC2       | Isoform 3 of Voltage-dependent anion-selective channel protein 2                         | Raft     | 3         | 32/294            | 2                     | 1   | 0   | 1   | 2                       | 2                       |                          |                          |                 |                     |         |         |
| 904 | IPI00031804 | VDAC3       | Isoform 1 of Voltage-dependent anion-selective channel protein 3                         | Non-raft | 10        | 108/283           | 8                     | 7   | 9   | 3   | 17                      | 10                      | 17                       | 10                       | 1.70            | 0.531               | 0.558   |         |
| 905 | IPI00418471 | VIM         | Vimentin                                                                                 | Raft     | 15        | 195/466           | 19                    | 7   | 3   | 1   | 22                      | 8                       | 22                       | 8                        | 2.75            | 1.012               | 0.315   | H       |
| 906 | IPI00024273 | VDLDR       | Isoform Long of Very low-density lipoprotein receptor precursor                          | Non-raft | 2         | 25/873            | 0                     | 2   | 0   | 0   | 0                       | 2                       | 0                        | 2                        | 0.50            | -0.693              | 0.959   |         |
| 907 | IPI00018931 | VPS35       | Vacuolar protein sorting-associated protein 35                                           | Non-raft | 2         | 23/796            | 2                     | 0   | 0   | 0   | 2                       | 0                       | 2                        | 0                        | 2.00            | 0.693               | 0.473   |         |
| 908 | IPI00746165 | WDR1        | WD repeat-containing protein 1 isoform 1                                                 | Non-raft | 3         | 42/606            | 3                     | 1   | 0   | 0   | 3                       | 1                       | 3                        | 1                        | 3.00            | 1.099               | 0.275   |         |
| 909 | IPI00220834 | XRCC5       | ATP-dependent DNA helicase 2 subunit 2                                                   | Non-raft | 11        | 142/732           | 9                     | 2   | 2   | 1   | 11                      | 3                       | 34                       | 17                       | 2.00            | 0.693               | 0.473   |         |
|     | IPI00220834 | XRCC5       | ATP-dependent DNA helicase 2 subunit 2                                                   | Raft     | 16        | 201/732           | 18                    | 12  | 5   | 2   | 23                      | 14                      |                          |                          |                 |                     |         |         |
| 910 | IPI00465430 | XRCC6       | 70 kDa protein                                                                           | Non-raft | 8         | 101/609           | 7                     | 4   | 1   | 1   | 8                       | 5                       | 16                       | 7                        | 2.29            | 0.827               | 0.405   |         |
|     | IPI00465430 | XRCC6       | 70 kDa protein                                                                           | Raft     | 8         | 116/609           | 6                     | 0   | 2   | 2   | 8                       | 2                       |                          |                          |                 |                     |         |         |
| 911 | IPI00657645 | XRN1        | Isoform 2 of 5'-3' exoribonuclease 1                                                     | Raft     | 3         | 30/1694           | 2                     | 2   | 0   | 0   | 2                       | 2                       | 2                        | 2                        | 1.00            | 0.000               | 0.799   |         |
| 912 | IPI00386208 | YA61        | Gastric-associated differentially-expressed protein YA61P                                | Non-raft | 14        | 138/136           | 106                   | 58  | 100 | 47  | 206                     | 105                     | 206                      | 105                      | 1.96            | 0.674               | 0.483   |         |
| 913 | IPI00013981 | YES1        | Proto-oncogene tyrosine-protein kinase Yes                                               | Non-raft | 17        | 221/543           | 16                    | 3   | 13  | 2   | 29                      | 5                       | 79                       | 11                       | 7.18            | 1.972               | 0.041   | M       |
|     | IPI00013981 | YES1        | Proto-oncogene tyrosine-protein kinase Yes                                               | Raft     | 26        | 342/543           | 30                    | 4   | 20  | 2   | 50                      | 6                       |                          |                          |                 |                     |         |         |
| 914 | IPI00216318 | YWHAB       | tyrosine 3-monooxygenase/tryptophan 5-monooxygenase activation protein, beta polypeptide | Non-raft | 5         | 75/246            | 4                     | 1   | 0   | 0   | 4                       | 1                       | 4                        | 1                        | 4.00            | 1.386               | 0.165   |         |
| 915 | IPI00000816 | YWHAE       | 14-3-3 protein epsilon                                                                   | Non-raft | 3         | 35/255            | 4                     | 0   | 0   | 0   | 4                       | 0                       | 6                        | 0                        | 6.00            | 1.792               | 0.067   |         |
|     | IPI00000816 | YWHAE       | 14-3-3 protein epsilon                                                                   | Raft     | 2         | 23/255            | 2                     | 0   | 0   | 0   | 2                       | 0                       |                          |                          |                 |                     |         |         |
| 916 | IPI00220642 | YWHAG       | 14-3-3 protein gamma                                                                     | Non-raft | 5         | 64/247            | 5                     | 1   | 0   | 0   | 5                       | 1                       | 7                        | 1                        | 7.00            | 1.946               | 0.044   | M       |
|     | IPI00220642 | YWHAG       | 14-3-3 protein gamma                                                                     | Raft     | 2         | 25/247            | 2                     | 0   | 0   | 0   | 2                       | 0                       |                          |                          |                 |                     |         |         |
| 917 | IPI00216319 | YWHAH       | 14-3-3 protein eta                                                                       | Non-raft | 2         | 25/246            | 2                     | 0   | 0   | 0   | 2                       | 0                       | 2                        | 0                        | 2.00            | 0.693               | 0.473   |         |
| 918 | IPI00018146 | YWHAQ       | 14-3-3 protein theta                                                                     | Non-raft | 3         | 31/245            | 3                     | 0   | 0   | 0   | 3                       | 0                       | 3                        | 0                        | 3.00            | 1.099               | 0.275   |         |
| 919 | IPI00021263 | YWHAZ       | 14-3-3 protein zeta/delta                                                                | Non-raft | 5         | 68/245            | 5                     | 2   | 0   | 0   | 5                       | 2                       | 8                        | 3                        | 2.67            | 0.981               | 0.329   |         |
|     | IPI00021263 | YWHAZ       | 14-3-3 protein zeta/delta                                                                | Raft     | 3         | 35/245            | 3                     | 1   | 0   | 0   | 3                       | 1                       |                          |                          |                 |                     |         |         |
| 920 | IPI00332936 | ZC3HAV1     | Isoform 2 of Zinc finger CCCH type antiviral protein 1                                   | Non-raft | 3         | 40/699            | 3                     | 0   | 0   | 0   | 3                       | 0                       | 11                       | 7                        | 1.57            | 0.452               | 0.598   |         |

| No. | Acc.Number  | Gene Symbol | Description                                            | Fraction | Uni. Pep. | Sequence Coverage | Biological Replicates |     |     |     | Total EXP Each Fraction | Total CON Each Fraction | Total EXP Both Fractions | Total CON Both Fractions | EXP/CON Imputed | Ln(EXP/CON imputed) | P-value | 17-ODYA |
|-----|-------------|-------------|--------------------------------------------------------|----------|-----------|-------------------|-----------------------|-----|-----|-----|-------------------------|-------------------------|--------------------------|--------------------------|-----------------|---------------------|---------|---------|
|     |             |             |                                                        |          |           |                   | 1st                   |     | 2nd |     |                         |                         |                          |                          |                 |                     |         |         |
|     |             |             |                                                        |          |           |                   | EXP                   | CON | EXP | CON |                         |                         |                          |                          |                 |                     |         |         |
|     | IPI00332936 | ZC3HAV1     | Isoform 2 of Zinc finger CCCH type antiviral protein 1 | Raft     | 8         | 132/699           | 7                     | 7   | 1   | 0   | 8                       | 7                       |                          |                          |                 |                     |         |         |
| 921 | IPI00062698 | ZDHHC12     | Isoform 1 of Probable palmitoyltransferase ZDHHC12     | Non-raft | 2         | 22/267            | 1                     | 0   | 2   | 0   | 3                       | 0                       | 5                        | 0                        | 5.00            | 1.609               | 0.103   |         |
|     | IPI00062698 | ZDHHC12     | Isoform 1 of Probable palmitoyltransferase ZDHHC12     | Raft     | 2         | 22/267            | 1                     | 0   | 1   | 0   | 2                       | 0                       |                          |                          |                 |                     |         |         |
| 922 | IPI00410663 | ZDHHC13     | Isoform 1 of Probable palmitoyltransferase ZDHHC13     | Non-raft | 2         | 25/622            | 2                     | 0   | 0   | 0   | 2                       | 0                       | 2                        | 0                        | 2.00            | 0.693               | 0.473   |         |
| 923 | IPI00410687 | ZDHHC17     | Huntingtin interacting protein 14                      | Non-raft | 2         | 18/632            | 2                     | 0   | 0   | 0   | 2                       | 0                       | 2                        | 0                        | 2.00            | 0.693               | 0.473   |         |
| 924 | IPI00398974 | ZDHHC20     | Isoform 1 of Probable palmitoyltransferase ZDHHC20     | Non-raft | 6         | 73/365            | 9                     | 0   | 2   | 0   | 11                      | 0                       | 14                       | 0                        | 14.00           | 2.639               | 0.005   |         |
|     | IPI00398974 | ZDHHC20     | Isoform 1 of Probable palmitoyltransferase ZDHHC20     | Raft     | 2         | 38/365            | 3                     | 0   | 0   | 0   | 3                       | 0                       |                          |                          |                 |                     |         |         |
| 925 | IPI00328272 | ZDHHC5      | Isoform 1 of Probable palmitoyltransferase ZDHHC5      | Non-raft | 10        | 151/715           | 9                     | 0   | 3   | 0   | 12                      | 0                       | 18                       | 0                        | 18.00           | 2.890               | 0.002   |         |
|     | IPI00328272 | ZDHHC5      | Isoform 1 of Probable palmitoyltransferase ZDHHC5      | Raft     | 4         | 69/715            | 4                     | 0   | 2   | 0   | 6                       | 0                       |                          |                          |                 |                     |         |         |
| 926 | IPI00008350 | ZDHHC6      | Isoform 1 of Probable palmitoyltransferase ZDHHC6      | Non-raft | 2         | 20/413            | 3                     | 0   | 0   | 0   | 3                       | 0                       | 3                        | 0                        | 3.00            | 1.099               | 0.275   |         |
| 927 | IPI00333858 | ZFR         | 117 kDa protein                                        | Raft     | 2         | 26/1079           | 3                     | 1   | 0   | 0   | 3                       | 1                       | 3                        | 1                        | 3.00            | 1.099               | 0.275   |         |
| 928 | IPI00020513 | ZYX         | 67 kDa protein                                         | Non-raft | 2         | 35/632            | 2                     | 1   | 0   | 0   | 2                       | 1                       | 2                        | 1                        | 2.00            | 0.693               | 0.473   |         |

**Note 1.** No. = Number (see the 1st column)

**Note 2.** Proteins were assorted according to the Gene Symbols (see the 3rd column).

**Note 3.** High-confidence S-acylated candidates were highlighted with yellow; medium-confidence S-acylated candidates with orange; high-confidence false-positive candidates with cyan; medium-confidence false-positive candidates with light pink (see the 2nd to 4th columns).

**Note 4.** Uni. Pep. = Unique Peptides (see the 6th column)

**Note 5.** A value of 1 was substituted for spectral counts of 0 so that the EXP/CON ratios and log-ratios ln(EXP/CON) can be calculated (see the 16th and 17th columns).

**Note 6.** Candidate S-acylated proteins with high (H) or medium (M) confidence (PMID: 19137006) (see the 19th column).

**Note 7:** S-acylated proteins were purified from 1.25 mg non-raft and 1.25 mg raft samples.

**Table S2. High-confidence candidate S-acylated proteins.**

| Acc.Number  | Gene Symbol | Description                                                                                           | P-value | Known Human              | Known Other Species      | 17-ODYA | Protein Family | Other Evidence           |
|-------------|-------------|-------------------------------------------------------------------------------------------------------|---------|--------------------------|--------------------------|---------|----------------|--------------------------|
| IPI00065486 | ABCB6       | CDNA FLJ32464 fis, clone SKNMC1000251, highly similar to Homo sapiens MT-ABC transporter (MTABC) mRNA | 0.005   |                          |                          |         |                |                          |
| IPI00006675 | ABCC4       | Multidrug resistance-associated protein 4                                                             | 0.044   |                          |                          |         |                |                          |
| IPI00029606 | ADAM17      | Isoform B of ADAM 17 precursor                                                                        | 0.030   |                          |                          |         |                |                          |
| IPI00103467 | ALDH1B1     | Aldehyde dehydrogenase X, mitochondrial precursor                                                     | 0.015   |                          |                          |         | ALDH           | <a href="#">8120000</a>  |
| IPI00018031 | ALDH3B1     | Isoform 1 of Aldehyde dehydrogenase 3B1                                                               | 0.002   |                          |                          |         | ALDH           | <a href="#">8120000</a>  |
| IPI00030431 | ANTXR1      | Isoform 1 of Anthrax toxin receptor 1 precursor                                                       | 0.000   | <a href="#">16401723</a> |                          | M       |                |                          |
| IPI00005163 | ARL15       | ARFRP2 protein                                                                                        | 0.044   |                          |                          | M       |                |                          |
| IPI00255653 | ATP11A      | Probable phospholipid-transporting ATPase IH                                                          | 0.015   |                          |                          |         |                |                          |
| IPI00240793 | ATP11B      | Probable phospholipid-transporting ATPase IF                                                          | 0.030   |                          |                          | M       |                |                          |
| IPI00001891 | AUP1        | Isoform Long of Ancient ubiquitous protein 1 precursor                                                | 0.011   |                          |                          | H       |                |                          |
| IPI00033075 | BAT5        | Protein BAT5                                                                                          | 0.044   |                          |                          | H       |                |                          |
| IPI00002406 | BCAM        | Lutheran blood group glycoprotein precursor                                                           | 0.003   |                          |                          |         |                |                          |
| IPI00016670 | C11orf59    | FLJ20625 protein                                                                                      | 0.000   |                          |                          | H       |                |                          |
| IPI00006980 | C14orf166   | Protein C14orf166                                                                                     | 0.011   |                          |                          |         |                |                          |
| IPI00166051 | C14orf24    | Uncharacterized protein C14orf24                                                                      | 0.030   |                          |                          |         |                |                          |
| IPI00303401 | C1orf75     | FLJ10874 protein                                                                                      | 0.030   |                          |                          | M       |                |                          |
| IPI00550440 | C2orf18     | Uncharacterized protein C2orf18 precursor                                                             | 0.011   |                          |                          |         |                |                          |
| IPI00020984 | CANX        | Calnexin precursor                                                                                    | 0.010   |                          | <a href="#">18350545</a> | mouse   | H              |                          |
| IPI00514301 | CASK        | Peripheral plasma membrane protein CASK                                                               | 0.030   |                          |                          |         |                |                          |
| IPI00009236 | CAV1        | Caveolin 1                                                                                            | 0.000   | <a href="#">11451957</a> |                          |         | Caveolin       |                          |
| IPI00019870 | CAV2        | Isoform Alpha of Caveolin-2                                                                           | 0.015   |                          |                          |         | Caveolin       |                          |
| IPI00334743 | CCNY        | Isoform 2 of Cyclin fold protein 1                                                                    | 0.021   |                          |                          | H       |                |                          |
| IPI00298851 | CD151       | CD151 antigen                                                                                         | 0.006   | <a href="#">11907260</a> |                          |         | Tetraspanin    |                          |
| IPI00297160 | CD44        | CD44 antigen isoform 4 precursor                                                                      | 0.001   | <a href="#">16945930</a> |                          |         |                |                          |
| IPI00215998 | CD63        | CD63 antigen                                                                                          | 0.013   | <a href="#">11959120</a> |                          |         |                |                          |
| IPI00031713 | CD70        | Tumor necrosis factor ligand superfamily member 7                                                     | 0.002   |                          |                          |         | TNF receptor   | <a href="#">17159908</a> |
| IPI00000190 | CD81        | CD81 antigen                                                                                          | 0.000   | <a href="#">11959120</a> |                          | M       | Tetraspanin    |                          |
| IPI00215997 | CD9         | CD9 antigen                                                                                           | 0.000   | <a href="#">11959120</a> |                          |         | Tetraspanin    |                          |
| IPI00290039 | CDCP1       | Isoform 1 of CUB domain-containing protein 1 precursor                                                | 0.003   |                          |                          |         |                |                          |
| IPI00141318 | CKAP4       | Isoform 1 of Cytoskeleton-associated protein 4                                                        | 0.000   | <a href="#">18296695</a> |                          |         |                |                          |
| IPI00007364 | CLDN3       | Claudin-3                                                                                             | 0.030   |                          |                          |         | Claudin        | <a href="#">15769849</a> |
| IPI00072743 | CLDND1      | Isoform 1 of Claudin domain-containing protein 1                                                      | 0.030   |                          |                          |         |                |                          |
| IPI00011284 | COMT        | Isoform Membrane-bound of Catechol O-methyltransferase                                                | 0.021   |                          |                          |         |                |                          |
| IPI00181294 | CSNK1G3     | Isoform 1 of Casein kinase I isoform gamma-3                                                          | 0.008   |                          |                          | M       | Casein kinase  | <a href="#">14668479</a> |
| IPI00009633 | CTDSP1      | Carboxy-terminal domain RNA polymerase II polypeptide A small phosphatase 1                           | 0.005   |                          |                          | M       |                |                          |
| IPI00182469 | CTNND1      | Isoform 1AB of Catenin delta-1                                                                        | 0.000   |                          | <a href="#">19092927</a> | rat     |                |                          |
| IPI00019146 | CXADR       | Isoform 1 of Coxsackievirus and adenovirus receptor precursor                                         | 0.000   | <a href="#">12021372</a> |                          |         |                |                          |
| IPI00385987 | DAGLB       | Isoform 1 of Sn1-specific diacylglycerol lipase beta                                                  | 0.011   |                          |                          | H       |                |                          |
| IPI00217282 | DCUN1D3     | DCN1, defective in cullin neddylation 1, domain containing 3                                          | 0.001   |                          |                          |         |                |                          |
| IPI00023780 | DNAJC5      | Isoform 2 of DnaJ homolog subfamily C member 5                                                        | 0.015   |                          | <a href="#">9761715</a>  | rat     | M              |                          |
| IPI00402231 | DNAJC5      | Isoform 1 of DnaJ homolog subfamily C member 5                                                        | 0.021   |                          | <a href="#">9761715</a>  | rat     | M              |                          |
| IPI00028931 | DSG2        | desmoglein 2 preproprotein                                                                            | 0.001   |                          |                          | M       |                |                          |
| IPI00216760 | ECE1        | Isoform C of Endothelin-converting enzyme 1                                                           | 0.000   | <a href="#">10359648</a> |                          |         |                |                          |
| IPI00470711 | EFR3A       | Hypothetical protein DKFZp781J0562                                                                    | 0.001   |                          |                          |         |                |                          |
| IPI00033143 | EIF3K       | Eukaryotic translation initiation factor 3 subunit 12                                                 | 0.030   |                          |                          |         |                |                          |
| IPI00010187 | ELOVL1      | Elongation of very long chain fatty acids protein 1                                                   | 0.015   |                          |                          |         |                | Fatty acid elongation    |

| Acc.Number  | Gene Symbol | Description                                                                             | P-value | Known Human              | Known Other Species            | 17-ODYA | Protein Family  | Other Evidence                                      |
|-------------|-------------|-----------------------------------------------------------------------------------------|---------|--------------------------|--------------------------------|---------|-----------------|-----------------------------------------------------|
| IPI00438286 | ERBB2IP     | Isoform 1 of Protein LAP2                                                               | 0.000   | <a href="#">18498353</a> |                                | H       |                 |                                                     |
| IPI00010338 | F3          | Tissue factor precursor                                                                 | 0.030   | <a href="#">3166978</a>  |                                |         |                 |                                                     |
| IPI00412592 | FAM108B1    | chromosome 9 open reading frame 77 isoform 2                                            | 0.005   |                          |                                | H       |                 |                                                     |
| IPI00303318 | FAM49B      | Protein FAM49B                                                                          | 0.000   |                          |                                | H       |                 |                                                     |
| IPI00027438 | FLOT1       | Flotillin-1                                                                             | 0.001   |                          | <a href="#">12370178</a> mouse | H       |                 |                                                     |
| IPI00029625 | FLOT2       | Flotillin-2                                                                             | 0.000   |                          | <a href="#">14599293</a> rat   | H       |                 |                                                     |
| IPI00217952 | GFPT1       | Isoform 1 of Glucosamine--fructose-6-phosphate aminotransferase [isomerizing] 1         | 0.006   |                          |                                |         |                 |                                                     |
| IPI00305551 | GNA11       | Guanine nucleotide-binding protein subunit alpha-11                                     | 0.000   | <a href="#">9175863</a>  |                                | H       | G protein alpha |                                                     |
| IPI00328744 | GNA12       | Guanine nucleotide-binding protein alpha-12 subunit                                     | 0.002   | <a href="#">9485474</a>  |                                |         | G protein alpha |                                                     |
| IPI00290928 | GNA13       | Guanine nucleotide-binding protein alpha-13 subunit                                     | 0.000   | <a href="#">10747909</a> |                                | H       | G protein alpha |                                                     |
| IPI00337415 | GNAI1       | Guanine nucleotide-binding protein G(i), alpha-1 subunit                                | 0.001   |                          | <a href="#">8484716</a> Rat    |         | G protein alpha |                                                     |
| IPI00748145 | GNAI2       | guanine nucleotide binding protein (G protein), alpha inhibiting activity polypeptide 2 | 0.021   |                          | <a href="#">8484716</a> Rat    | H       | G protein alpha |                                                     |
| IPI00220578 | GNAI3       | Guanine nucleotide-binding protein G(k) subunit alpha                                   | 0.026   |                          |                                | H       | G protein alpha | <a href="#">8484716</a>                             |
| IPI00288947 | GNAQ        | Guanine nucleotide binding protein                                                      | 0.000   | <a href="#">8227063</a>  |                                | H       | G protein alpha |                                                     |
| IPI00219835 | GNAS        | Isoform Gnas-2 of Guanine nucleotide-binding protein G(s) subunit alpha isoforms short  | 0.007   |                          | <a href="#">8484716</a> Rat    | H       | G protein alpha |                                                     |
| IPI00514055 | GNAS        | Isoform Gnas-1 of Guanine nucleotide-binding protein G(s) subunit alpha isoforms short  | 0.007   |                          | <a href="#">8484716</a> Rat    | H       | G protein alpha |                                                     |
| IPI00644936 | GNAS        | Guanine nucleotide-binding protein G-s-alpha-3                                          | 0.000   |                          | <a href="#">8484716</a> Rat    | H       | G protein alpha |                                                     |
| IPI00480022 | GOLGA7      | Isoform 1 of Golgin subfamily A member 7                                                | 0.000   | <a href="#">14522980</a> |                                | H       |                 |                                                     |
| IPI00004962 | GOLIM4      | golgi phosphoprotein 4                                                                  | 0.006   |                          |                                |         |                 |                                                     |
| IPI00027497 | GPI         | Glucose-6-phosphate isomerase                                                           | 0.021   |                          |                                |         |                 |                                                     |
| IPI00217481 | GPR126      | Developmentally regulated G-protein-coupled receptor beta 1                             | 0.003   |                          |                                |         | GPCR            | <a href="#">15250498</a>                            |
| IPI00022624 | GPRC5A      | Retinoic acid-induced protein 3                                                         | 0.000   |                          |                                |         |                 |                                                     |
| IPI00099883 | GPRC5C      | G-protein coupled receptor family C group 5 member C precursor                          | 0.021   |                          |                                |         | GPCR            | <a href="#">15250498</a>                            |
| IPI00008475 | HMGCS1      | Hydroxymethylglutaryl-CoA synthase, cytoplasmic                                         | 0.006   |                          |                                |         |                 | azidopalmitate labeling<br><a href="#">17971398</a> |
| IPI00000006 | HRAS        | GTPase HRas precursor                                                                   | 0.001   | <a href="#">10504264</a> |                                | H       |                 |                                                     |
| IPI00017726 | HSD17B10    | hydroxyacyl-Coenzyme A dehydrogenase, type II isoform 1                                 | 0.030   |                          |                                | M       |                 | azidopalmitate labeling<br><a href="#">17971398</a> |
| IPI00027422 | ITGB4       | Isoform Beta-4C of Integrin beta-4 precursor                                            | 0.002   | <a href="#">14517202</a> |                                |         |                 |                                                     |
| IPI00016014 | ITM2C       | Isoform 1 of Integral membrane protein 2C                                               | 0.005   |                          |                                |         |                 |                                                     |
| IPI00029046 | KIAA0152    | Protein KIAA0152 precursor                                                              | 0.028   |                          |                                | H       |                 |                                                     |
| IPI00423568 | KRAS        | Isoform 2A of GTPase KRas                                                               | 0.006   | <a href="#">3023817</a>  |                                | H       |                 |                                                     |
| IPI00014172 | LAPTM4A     | Lysosomal-associated transmembrane protein 4A                                           | 0.006   |                          |                                |         |                 |                                                     |
| IPI00221240 | LNPEP       | Isoform 2 of Leucyl-cystinyl aminopeptidase                                             | 0.001   |                          |                                | H       |                 |                                                     |
| IPI00427739 | LRRC1       | Isoform 1 of Leucine-rich repeat-containing protein 1                                   | 0.000   |                          |                                | M       |                 |                                                     |
| IPI00409640 | LSR         | Isoform 1 of Lipolysis-stimulated lipoprotein receptor                                  | 0.000   |                          |                                |         |                 | Cystein-rich domain                                 |
| IPI00298625 | LYN         | v-yes-1 Yamaguchi sarcoma viral related oncogene homolog                                | 0.001   | <a href="#">10669752</a> |                                |         |                 |                                                     |
| IPI00016334 | MCAM        | Isoform 1 of Cell surface glycoprotein MUC18 precursor                                  | 0.006   |                          |                                |         |                 |                                                     |
| IPI00395906 | MGC59937    | Similar to RIKEN cDNA 2310002J15 gene                                                   | 0.021   |                          |                                |         |                 |                                                     |
| IPI00218398 | MMP14       | Matrix metalloproteinase-14 precursor                                                   | 0.011   | <a href="#">15946988</a> |                                |         |                 |                                                     |
| IPI00174976 | MPP5        | Isoform 1 of MAGUK p55 subfamily member 5                                               | 0.021   |                          |                                |         | MAGUK p55       | <a href="#">1713685</a>                             |
| IPI00303280 | MPP6        | MAGUK p55 subfamily member 6                                                            | 0.001   |                          |                                | M       | MAGUK p55       | <a href="#">1713685</a>                             |
| IPI00328715 | MTDH        | Protein LYRIC                                                                           | 0.000   |                          |                                | H       |                 |                                                     |
| IPI00385172 | MUC1        | Mucin 1, transmembrane                                                                  | 0.001   | <a href="#">16507569</a> |                                |         |                 |                                                     |
| IPI00012069 | NQO1        | NAD(P)H dehydrogenase [quinone] 1                                                       | 0.044   |                          |                                |         |                 |                                                     |
| IPI00000005 | NRAS        | GTPase NRas precursor                                                                   | 0.000   | <a href="#">2661017</a>  |                                |         |                 |                                                     |

| Acc.Number  | Gene Symbol | Description                                                               | P-value | Known Human              | Known Other Species      | 17-ODYA | Protein Family | Other Evidence                                      |
|-------------|-------------|---------------------------------------------------------------------------|---------|--------------------------|--------------------------|---------|----------------|-----------------------------------------------------|
| IPI00299594 | NRP1        | Isoform 1 of Neuropilin-1 precursor                                       | 0.000   |                          |                          |         |                |                                                     |
| IPI00017231 | NRSN2       | Protein C20orf98                                                          | 0.030   |                          |                          |         |                |                                                     |
| IPI00022674 | OSMR        | oncostatin M receptor                                                     | 0.002   |                          |                          |         |                |                                                     |
| IPI00329572 | PACSIN3     | 49 kDa protein                                                            | 0.000   |                          |                          |         |                |                                                     |
| IPI00301023 | PALM        | Isoform 1 of Paralemmin                                                   | 0.021   |                          | <a href="#">19299482</a> | monkey  |                |                                                     |
| IPI00073769 | PALM2       | A kinase                                                                  | 0.044   |                          |                          |         |                |                                                     |
| IPI00020124 | PI4K2A      | Phosphatidylinositol 4-kinase type II                                     | 0.000   |                          | <a href="#">19211550</a> | rat     | H              |                                                     |
| IPI00291068 | PI4K2B      | Phosphatidylinositol 4-kinase type-II beta                                | 0.044   |                          | <a href="#">17927563</a> | bovine  | H              |                                                     |
| IPI00005181 | PLSCR1      | Phospholipid scramblase 1                                                 | 0.000   | <a href="#">12564925</a> |                          |         |                | PLSCR                                               |
| IPI00216127 | PLSCR3      | Phospholipid scramblase 3                                                 | 0.011   |                          |                          |         |                | PLSCR <a href="#">12564925</a>                      |
| IPI00009276 | PROCR       | Endothelial protein C receptor precursor                                  | 0.008   |                          |                          |         |                |                                                     |
| IPI00028077 | PSEN1       | Isoform 1 of Presenilin-1                                                 | 0.005   |                          |                          |         | M              |                                                     |
| IPI00022048 | PTGFRN      | Prostaglandin F2 receptor negative regulator precursor                    | 0.001   |                          |                          |         |                |                                                     |
| IPI00168812 | PTK7        | PTK7 protein tyrosine kinase 7 isoform d precursor                        | 0.011   |                          |                          |         | M              |                                                     |
| IPI00107831 | PTRPF       | Receptor-type tyrosine-protein phosphatase F precursor                    | 0.044   |                          |                          |         |                |                                                     |
| IPI00032903 | PTRH2       | Peptidyl-tRNA hydrolase 2, mitochondrial precursor                        | 0.015   |                          |                          |         | H              |                                                     |
| IPI00023974 | PTTG1IP     | Pituitary tumor-transforming gene 1 protein-interacting protein precursor | 0.015   |                          |                          |         | H              |                                                     |
| IPI00219425 | PVR         | Isoform Beta of Poliovirus receptor precursor                             | 0.005   |                          |                          |         |                |                                                     |
| IPI00022661 | PVRL2       | Isoform Delta of Poliovirus receptor-related protein 2 precursor          | 0.015   |                          |                          |         |                |                                                     |
| IPI00005719 | RAB1A       | RAB1A, member RAS oncogene family                                         | 0.039   |                          |                          |         |                | Ras-related                                         |
| IPI00016339 | RAB5C       | Ras-related protein Rab-5C                                                | 0.044   |                          |                          |         | M              | Ras-related                                         |
| IPI00217519 | RALA        | Ras-related protein Ral-A                                                 | 0.003   |                          |                          |         |                | Ras-related                                         |
| IPI00004397 | RALB        | Ras-related protein Ral-B                                                 | 0.002   |                          |                          |         |                | Ras-related                                         |
| IPI00019346 | RAP2A       | Ras-related protein Rap-2a                                                | 0.006   |                          |                          |         | H              | Highly homologous to RAP2B <a href="#">18582561</a> |
| IPI00018364 | RAP2B       | Ras-related protein Rap-2b precursor                                      | 0.000   | <a href="#">18582561</a> |                          |         | H              |                                                     |
| IPI00009607 | RAP2C       | Ras-related protein Rap-2c precursor                                      | 0.000   |                          |                          |         | H              | Ras-related                                         |
| IPI00216890 | RELL1       | Similar to expressed sequence AA536743                                    | 0.030   |                          |                          |         |                |                                                     |
| IPI00008802 | RGS20       | Isoform 6 of Regulator of G-protein signaling 20                          | 0.011   |                          |                          |         |                |                                                     |
| IPI00027500 | RHOA        | Transforming protein RhoA precursor                                       | 0.044   |                          |                          |         |                | Rho                                                 |
| IPI00000041 | RHOB        | Rho-related GTP-binding protein RhoB precursor                            | 0.011   | <a href="#">1400319</a>  |                          |         |                | Rho                                                 |
| IPI00550021 | RPL3        | 60S ribosomal protein L3                                                  | 0.003   |                          |                          |         | H              |                                                     |
| IPI00219156 | RPL30       | 60S ribosomal protein L30                                                 | 0.021   |                          |                          |         |                |                                                     |
| IPI00020418 | RRAS        | Ras-related protein R-Ras                                                 | 0.000   | <a href="#">12890755</a> |                          |         | H              |                                                     |
| IPI00012512 | RRAS2       | Ras-related protein R-Ras2                                                | 0.000   |                          |                          |         |                | Homologous to RRAS <a href="#">12890755</a>         |
| IPI00061267 | RSPRY1      | Ring finger and SPRY domain containing 1                                  | 0.000   |                          |                          |         | M              |                                                     |
| IPI00005129 | SCAMP1      | Isoform 1 of Secretory carrier-associated membrane protein 1              | 0.000   |                          | <a href="#">19092927</a> | rat     | H              | SCAMP                                               |
| IPI00218850 | SCAMP2      | Secretory carrier-associated membrane protein 2                           | 0.002   |                          |                          |         | H              | SCAMP                                               |
| IPI00306382 | SCAMP3      | Isoform 1 of Secretory carrier-associated membrane protein 3              | 0.018   |                          |                          |         | H              | SCAMP                                               |
| IPI00056310 | SCAMP4      | Secretory carrier-associated membrane protein 4                           | 0.001   |                          |                          |         |                | SCAMP                                               |
| IPI00177968 | SCARB1      | Isoform 1 of Scavenger receptor class B member 1                          | 0.024   |                          |                          |         |                |                                                     |
| IPI00217766 | SCARB2      | Lysosome membrane protein 2                                               | 0.000   |                          |                          |         |                |                                                     |
| IPI00410666 | SCRIB       | Isoform 3 of Protein LAP4                                                 | 0.000   |                          |                          |         | H              | LAP <a href="#">18498353</a>                        |
| IPI00006666 | SLC16A3     | Monocarboxylate transporter 4                                             | 0.044   |                          |                          |         |                |                                                     |
| IPI00375452 | SLC19A1     | Folate transporter 1                                                      | 0.030   |                          |                          |         |                |                                                     |
| IPI00019472 | SLC1A5      | Neutral amino acid transporter B(0)                                       | 0.005   |                          |                          |         | H              |                                                     |
| IPI00032107 | SLC26A2     | Sulfate transporter                                                       | 0.003   |                          |                          |         |                |                                                     |
| IPI00384867 | SLC35B2     | Isoform 2 of Adenosine 3'-phospho 5'-phosphosulfate transporter 1         | 0.015   |                          |                          |         | M              |                                                     |
| IPI00410034 | SLC38A2     | Putative 40-9-1 protein                                                   | 0.021   |                          |                          |         | H              |                                                     |
| IPI00221393 | SLC44A1     | Isoform 1 of Choline transporter-like protein 1                           | 0.000   |                          |                          |         |                |                                                     |
| IPI00031822 | SLC5A6      | Sodium-dependent multivitamin transporter                                 | 0.044   |                          |                          |         | M              |                                                     |

| Acc.Number  | Gene Symbol | Description                                                                     | P-value | Known Human              | Known Other Species      | 17-ODYA | Protein Family |               | Other Evidence           |  |
|-------------|-------------|---------------------------------------------------------------------------------|---------|--------------------------|--------------------------|---------|----------------|---------------|--------------------------|--|
| IPI00027728 | SLC7A1      | High-affinity cationic amino acid transporter 1                                 | 0.030   |                          |                          | M       |                |               |                          |  |
| IPI00010438 | SNAP23      | Isoform SNAP-23a of Synaptosomal-associated protein 23                          | 0.000   | <a href="#">10329400</a> |                          | H       |                |               |                          |  |
| IPI00012434 | STARD3NL    | Isoform 1 of MLN64 N-terminal domain homolog                                    | 0.044   |                          |                          |         |                |               |                          |  |
| IPI00219682 | STOM        | Erythrocyte band 7 integral membrane protein                                    | 0.000   | <a href="#">10338112</a> |                          | H       |                |               |                          |  |
| IPI00013930 | STX6        | Syntaxin-6                                                                      | 0.021   |                          | <a href="#">19092927</a> | rat     | H              | Syntaxin      | <a href="#">15973437</a> |  |
| IPI00009225 | STX8        | Syntaxin-8                                                                      | 0.001   | <a href="#">18980942</a> |                          |         | H              | Syntaxin      |                          |  |
| IPI00399142 | SURF4       | Surfeit 4                                                                       | 0.000   |                          |                          |         | H              |               |                          |  |
| IPI00022462 | TFRC        | Transferrin receptor protein 1                                                  | 0.012   | <a href="#">2398066</a>  |                          |         | H              |               |                          |  |
| IPI00009976 | TMED1       | Transmembrane emp24 domain-containing protein 1 precursor                       | 0.044   |                          |                          |         | M              |               |                          |  |
| IPI00000612 | TMEM50A     | Transmembrane protein 50A                                                       | 0.021   |                          |                          |         |                |               |                          |  |
| IPI00399320 | TMEM59      | Transmembrane protein 59                                                        | 0.044   |                          |                          |         |                |               |                          |  |
| IPI00514538 | TMEM63B     | transmembrane protein 63B                                                       | 0.021   |                          |                          |         |                |               |                          |  |
| IPI00304866 | TNFAIP2     | Tumor necrosis factor, alpha-induced protein 2                                  | 0.044   |                          |                          |         |                |               |                          |  |
| IPI00021975 | TNFRSF10A   | Tumor necrosis factor receptor superfamily member 10A precursor                 | 0.000   | <a href="#">19090789</a> |                          |         |                | TNF receptor  | <a href="#">17159908</a> |  |
| IPI00296379 | TNFRSF10B   | Isoform Long of Tumor necrosis factor receptor superfamily member 10B precursor | 0.000   |                          |                          |         |                | TNF receptor  | <a href="#">17159908</a> |  |
| IPI00009111 | TPBG        | Trophoblast glycoprotein precursor                                              | 0.019   |                          |                          |         |                |               |                          |  |
| IPI00004324 | TRAPPC3     | Trafficking protein particle complex subunit 3                                  | 0.001   | <a href="#">15692564</a> |                          |         |                |               |                          |  |
| IPI00877061 | TTYH3       | Isoform 3 of protein tweety homolog 3                                           | 0.015   |                          |                          |         |                |               |                          |  |
| IPI00395887 | TXNDC1      | Thioredoxin domain-containing protein 1 precursor                               | 0.005   |                          |                          |         | H              |               |                          |  |
| IPI00064193 | TXNDC10     | Isoform 1 of Protein disulfide-isomerase TXNDC10 precursor                      | 0.005   |                          |                          |         | H              |               |                          |  |
| IPI00017227 | UBTD1       | Ubiquitin domain-containing protein 1                                           | 0.003   |                          |                          |         |                |               |                          |  |
| IPI00034049 | UPF1        | Isoform 1 of Regulator of nonsense transcripts 1                                | 0.044   |                          |                          |         |                |               |                          |  |
| IPI00549343 | VAMP3       | Vesicle-associated membrane protein 3                                           | 0.000   |                          |                          |         | H              | Synaptobrevin | <a href="#">10845776</a> |  |
| IPI00013236 | VAMP7       | Isoform 2 of Synaptobrevin-like protein 1                                       | 0.011   |                          |                          |         |                | Synaptobrevin | <a href="#">10845776</a> |  |
| IPI00031195 | VANGL1      | Isoform 1 of Vang-like protein 1                                                | 0.003   |                          |                          |         | H              |               |                          |  |
| IPI00013981 | YES1        | Proto-oncogene tyrosine-protein kinase Yes                                      | 0.041   |                          | <a href="#">7980442</a>  | monkey  | M              |               |                          |  |
| IPI00220642 | YWHAG       | 14-3-3 protein gamma                                                            | 0.044   |                          |                          |         | M              |               |                          |  |
| IPI00398974 | ZDHHC20     | Isoform 1 of Probable palmitoyltransferase ZDHHC20                              | 0.005   |                          |                          |         | H              | DHHC protein  |                          |  |
| IPI00328272 | ZDHHC5      | Isoform 1 of Probable palmitoyltransferase ZDHHC5                               | 0.002   |                          |                          |         | M              | DHHC protein  |                          |  |

**Note 1.** Acc. Number = Accession Number (see the 1st column)

**Note 2.** Candidate S-acylated proteins with high (H) or medium (M) confidence (PMID: 19137006) (see the 8th column)



**Table S3. Medium-confidence candidate S-acylated proteins.**

| Acc. Number | Gene Symbol | Description                                                                                                                         | P-value | Known Human              | Known Other Species          | 17-ODYA | Protei Family                    |
|-------------|-------------|-------------------------------------------------------------------------------------------------------------------------------------|---------|--------------------------|------------------------------|---------|----------------------------------|
| IPI00029737 | ACSL4       | Isoform Long of Long-chain-fatty-acid--CoA ligase 4                                                                                 | 0.165   |                          |                              |         |                                  |
| IPI00013897 | ADAM10      | ADAM 10 precursor                                                                                                                   | 0.089   |                          |                              | M       |                                  |
| IPI00025057 | ADAR        | Isoform 2 of Double-stranded RNA-specific adenosine deaminase                                                                       | 0.275   |                          |                              |         |                                  |
| IPI00019141 | AGPAT1      | 1-acyl-sn-glycerol-3-phosphate acyltransferase alpha                                                                                | 0.103   |                          |                              | H       |                                  |
| IPI00385128 | AGPAT7      | Isoform 1 of 1-acyl-sn-glycerol-3-phosphate acyltransferase eta                                                                     | 0.067   |                          |                              |         |                                  |
| IPI00856045 | AHNAK2      | Isoform 1 of protein AHNAK2                                                                                                         | 0.275   |                          |                              |         |                                  |
| IPI00008982 | ALDH18A1    | Isoform Long of Delta 1-pyrroline-5-carboxylate synthetase                                                                          | 0.067   |                          |                              |         |                                  |
| IPI00019888 | ALDH5A1     | Succinate semialdehyde dehydrogenase, mitochondrial precursor                                                                       | 0.275   |                          |                              |         |                                  |
| IPI00024990 | ALDH6A1     | Methylmalonate-semialdehyde dehydrogenase [acylating], mitochondrial precursor                                                      | 0.165   |                          |                              |         | ALDH <a href="#">8120000</a>     |
| IPI00036552 | ANTXR2      | Isoform 2 of Anthrax toxin receptor 2 precursor                                                                                     | 0.067   |                          |                              |         |                                  |
| IPI00555692 | ANXA4       | ANXA4 protein                                                                                                                       | 0.067   |                          |                              |         |                                  |
| IPI00016621 | AP2A2       | AP-2 complex subunit alpha-2                                                                                                        | 0.165   |                          |                              |         |                                  |
| IPI00007426 | ARL6IP5     | PRA1 family protein 3                                                                                                               | 0.103   |                          |                              |         |                                  |
| IPI00167074 | ARL6IP6     | Phosphonoformate immuno-associated protein 1                                                                                        | 0.275   |                          |                              | H       |                                  |
| IPI00018871 | ARL8B       | ADP-ribosylation factor-like protein 8B                                                                                             | 0.275   |                          |                              |         |                                  |
| IPI00013698 | ASAHI       | Acid ceramidase precursor                                                                                                           | 0.275   |                          |                              |         |                                  |
| IPI00420014 | ASCC3L1     | U5 small nuclear ribonucleoprotein 200 kDa helicase                                                                                 | 0.212   |                          |                              | M       |                                  |
| IPI00554777 | ASNS        | Asparagine synthetase                                                                                                               | 0.275   |                          |                              |         |                                  |
| IPI00177661 | ATP13A3     | PREDICTED: similar to Probable cation-transporting ATPase 13A3 (ATPase family homolog up-regulated in senescence cells 1) isoform 2 | 0.103   |                          |                              | M       |                                  |
| IPI00012490 | ATP2B4      | Isoform XD of Plasma membrane calcium-transporting ATPase 4                                                                         | 0.275   |                          |                              | M       |                                  |
| IPI00303476 | ATP5B       | ATP synthase subunit beta, mitochondrial precursor                                                                                  | 0.130   |                          |                              |         |                                  |
| IPI00215767 | B4GALT1     | Isoform Long of Beta-1,4-galactosyltransferase 1                                                                                    | 0.275   |                          |                              | M       |                                  |
| IPI00000643 | BAG2        | BAG family molecular chaperone regulator 2                                                                                          | 0.275   |                          |                              |         |                                  |
| IPI00019835 | BCL2L12     | Isoform 1 of Bcl-2-related proline-rich protein                                                                                     | 0.067   |                          |                              |         |                                  |
| IPI00030959 | C13orf1     | 24 kDa protein                                                                                                                      | 0.103   |                          |                              |         |                                  |
| IPI00056357 | C19orf10    | Uncharacterized protein C19orf10 precursor                                                                                          | 0.165   |                          |                              |         |                                  |
| IPI00550689 | C22orf28    | UPF0027 protein C22orf28                                                                                                            | 0.275   |                          |                              |         |                                  |
| IPI00024618 | C3orf37     | UPF0361 protein DC12                                                                                                                | 0.067   |                          |                              |         |                                  |
| IPI00031617 | C6orf125    | Protein C6orf125                                                                                                                    | 0.165   |                          |                              |         |                                  |
| IPI00395627 | CACYBP      | Isoform 1 of Calyculin-binding protein                                                                                              | 0.275   |                          |                              |         |                                  |
| IPI00176427 | CADM4       | TSLC1-like 2                                                                                                                        | 0.067   |                          | <a href="#">19092927</a> rat |         |                                  |
| IPI00008274 | CAP1        | Adenylyl cyclase-associated protein 1                                                                                               | 0.165   |                          |                              |         |                                  |
| IPI00026185 | CAPZB       | Isoform 1 of F-actin capping protein subunit beta                                                                                   | 0.130   |                          |                              |         |                                  |
| IPI00185371 | CCNYL1      | CDNA FLJ40432 fis, clone TESTI2039227                                                                                               | 0.067   |                          |                              | M       |                                  |
| IPI00410488 | CD276       | Isoform 1 of CD276 antigen precursor                                                                                                | 0.103   |                          |                              |         |                                  |
| IPI00219852 | CD46        | Isoform B of Membrane cofactor protein precursor                                                                                    | 0.103   |                          |                              |         |                                  |
| IPI00000059 | CD58        | LFA-3                                                                                                                               | 0.275   |                          |                              |         |                                  |
| IPI00016786 | CDC42       | Isoform 2 of Cell division control protein 42 homolog precursor                                                                     | 0.231   |                          | <a href="#">19092927</a> rat |         | Rho                              |
| IPI00024973 | CDC42SE2    | CDC42 small effector 2                                                                                                              | 0.103   |                          |                              | M       |                                  |
| IPI00015713 | CDKAL1      | CDK5 regulatory subunit associated protein 1-like 1                                                                                 | 0.275   |                          |                              |         |                                  |
| IPI00000691 | CLDN1       | Claudin-1                                                                                                                           | 0.103   |                          |                              |         | Claudin <a href="#">15769849</a> |
| IPI00059710 | CLDN23      | Claudin-23                                                                                                                          | 0.067   |                          |                              |         | Claudin <a href="#">15769849</a> |
| IPI00430813 | CNBP        | Isoform 2 of Cellular nucleic acid-binding protein                                                                                  | 0.165   |                          |                              |         |                                  |
| IPI00220993 | CNP         | Isoform CNPI of 2',3'-cyclic-nucleotide 3'-phosphodiesterase                                                                        | 0.165   |                          |                              |         |                                  |
| IPI00007058 | CORO1B      | Coronin-1B                                                                                                                          | 0.165   |                          |                              |         |                                  |
| IPI00027078 | CPD         | Carboxypeptidase D precursor                                                                                                        | 0.103   | <a href="#">12643288</a> |                              | H       |                                  |

| Acc. Number | Gene Symbol | Description                                                                 | P-value | Known Human              | Known Other Species     | 17-ODYA | Protei Family                          |                                                |
|-------------|-------------|-----------------------------------------------------------------------------|---------|--------------------------|-------------------------|---------|----------------------------------------|------------------------------------------------|
| IPI00032038 | CPT1A       | Isoform 1 of Carnitine O-palmitoyltransferase 1, liver isoform              | 0.165   |                          |                         | M       |                                        |                                                |
| IPI00219823 | CSNK1G1     | Isoform 1S of Casein kinase I isoform gamma-1                               | 0.165   |                          |                         | M       | Casein kinase <a href="#">14668479</a> |                                                |
| IPI00297767 | CSNK1G2     | Casein kinase I isoform gamma-2                                             | 0.067   |                          |                         |         |                                        |                                                |
| IPI00024826 | CTDSPL      | CTD small phosphatase-like protein                                          | 0.275   |                          |                         |         |                                        |                                                |
| IPI00215948 | CTNNA1      | Isoform 1 of Catenin alpha-1                                                | 0.231   |                          |                         |         |                                        |                                                |
| IPI00017292 | CTNNB1      | Isoform 1 of Catenin beta-1                                                 | 0.275   |                          |                         |         |                                        |                                                |
| IPI00303954 | CY5B        | cytochrome b5 outer mitochondrial membrane precursor                        | 0.103   |                          |                         |         |                                        |                                                |
| IPI00644231 | CYFIP1      | cytoplasmic FMR1 interacting protein 1 isoform a                            | 0.275   |                          |                         |         |                                        |                                                |
| IPI00337800 | DAAM1       | Isoform 1 of Disheveled-associated activator of morphogenesis 1             | 0.067   |                          |                         | M       |                                        |                                                |
| IPI00003406 | DBN1        | Drebrin                                                                     | 0.231   |                          |                         |         |                                        |                                                |
| IPI00300567 | DCI         | Isoform 1 of 3,2-trans-enoyl-CoA isomerase, mitochondrial precursor         | 0.165   |                          |                         |         |                                        |                                                |
| IPI00030320 | DDX6        | Probable ATP-dependent RNA helicase DDX6                                    | 0.067   |                          |                         |         |                                        |                                                |
| IPI00003482 | DECR1       | 2,4-dienoyl-CoA reductase, mitochondrial precursor                          | 0.103   |                          |                         |         |                                        |                                                |
| IPI00024993 | ECHS1       | Enoyl-CoA hydratase, mitochondrial precursor                                | 0.275   |                          |                         |         |                                        |                                                |
| IPI00376317 | EDC4        | autoantigen RCD8                                                            | 0.103   |                          |                         | M       |                                        |                                                |
| IPI00023048 | EEF1D       | Elongation factor 1-delta                                                   | 0.275   |                          |                         | M       |                                        |                                                |
| IPI00304661 | EEP1        | hypothetical protein LOC80820                                               | 0.067   |                          |                         |         |                                        |                                                |
| IPI00220349 | EIF2C2      | eukaryotic translation initiation factor 2C, 2                              | 0.275   |                          |                         |         |                                        |                                                |
| IPI00016910 | EIF3C       | Eukaryotic translation initiation factor 3 subunit 8                        | 0.165   |                          |                         | M       |                                        |                                                |
| IPI00647650 | EIF3H       | Eukaryotic translation initiation factor 3 subunit 3                        | 0.103   |                          |                         |         |                                        |                                                |
| IPI00009328 | EIF4A3      | Probable ATP-dependent RNA helicase DDX48                                   | 0.275   |                          |                         | M       |                                        |                                                |
| IPI00022648 | EIF5        | Eukaryotic translation initiation factor 5                                  | 0.103   |                          |                         |         |                                        |                                                |
| IPI00006935 | EIF5A2      | Eukaryotic translation initiation factor 5A-2                               | 0.275   |                          |                         |         |                                        |                                                |
| IPI00010105 | EIF6        | Eukaryotic translation initiation factor 6                                  | 0.275   |                          |                         |         |                                        |                                                |
| IPI00006438 | ERGIC3      | Isoform 1 of Endoplasmic reticulum-Golgi intermediate compartment protein 3 | 0.275   |                          |                         | H       |                                        |                                                |
| IPI00024911 | ERP29       | Endoplasmic reticulum protein ERp29 precursor                               | 0.275   |                          |                         |         |                                        |                                                |
| IPI00429191 | ETF1        | Eukaryotic peptide chain release factor subunit 1                           | 0.275   |                          |                         |         |                                        |                                                |
| IPI00015905 | EXOSC2      | Exosome complex exonuclease RRP4                                            | 0.165   |                          |                         |         |                                        |                                                |
| IPI00039626 | FAM120A     | Isoform D of UPF0318 protein FAM120A                                        | 0.165   |                          |                         |         |                                        |                                                |
| IPI00026781 | FASN        | Fatty acid synthase                                                         | 0.108   |                          |                         |         |                                        |                                                |
| IPI00174757 | FBXL20      | F-box/LRR-repeat protein 20                                                 | 0.103   |                          |                         |         |                                        |                                                |
| IPI00021048 | FER1L3      | Isoform 1 of Myoferlin                                                      | 0.167   |                          |                         |         |                                        |                                                |
| IPI00000856 | FERMT2      | Isoform 1 of Pleckstrin homology domain-containing family C member 1        | 0.275   |                          |                         |         |                                        |                                                |
| IPI00301987 | FLJ20323    | hypothetical protein FLJ20323                                               | 0.103   |                          |                         |         |                                        |                                                |
| IPI00016250 | FXR2        | Fragile X mental retardation syndrome-related protein 2                     | 0.165   |                          |                         |         |                                        |                                                |
| IPI00020228 | FZD6        | Frizzled-6 precursor                                                        | 0.067   |                          |                         |         |                                        |                                                |
| IPI00220281 | GNAO1       | Guanine nucleotide-binding protein G(o) subunit alpha 1                     | 0.067   |                          | <a href="#">8484716</a> | Rat     | H                                      | G alpha                                        |
| IPI00005677 | GNPAT       | Dihydroxyacetone phosphate acyltransferase                                  | 0.275   |                          |                         |         | M                                      |                                                |
| IPI00022793 | HADHB       | Trifunctional enzyme beta subunit, mitochondrial precursor                  | 0.103   |                          |                         |         | H                                      |                                                |
| IPI00471955 | HLA-B       | HLA class I histocompatibility antigen, B-50 alpha chain precursor          | 0.076   |                          |                         |         | H                                      | Homologous to HLA B-7 <a href="#">17785801</a> |
| IPI00473131 | HLA-C       | HLA class I histocompatibility antigen, Cw-6 alpha chain precursor          | 0.168   | <a href="#">17785801</a> |                         |         | H                                      |                                                |
| IPI00011913 | HNRNPA0     | Heterogeneous nuclear ribonucleoprotein A0                                  | 0.275   |                          |                         |         |                                        |                                                |
| IPI00419373 | HNRPA3      | Isoform 1 of Heterogeneous nuclear ribonucleoprotein A3                     | 0.103   |                          |                         |         |                                        |                                                |
| IPI00003881 | HNRPF       | heterogeneous nuclear ribonucleoprotein F                                   | 0.275   |                          |                         |         |                                        |                                                |
| IPI00171903 | HNRPM       | heterogeneous nuclear ribonucleoprotein M isoform a                         | 0.231   |                          |                         |         |                                        |                                                |
| IPI00013234 | IARS        | IARS protein                                                                | 0.275   |                          |                         |         | M                                      |                                                |
| IPI00289819 | IGF2R       | Cation-independent mannose-6-phosphate receptor precursor                   | 0.275   |                          |                         |         | H                                      |                                                |
| IPI00056478 | IGSF8       | Isoform 1 of Immunoglobulin superfamily member 8 precursor                  | 0.165   |                          |                         |         | H                                      |                                                |
| IPI00788962 | IL10RB      | Protein                                                                     | 0.275   |                          |                         |         |                                        |                                                |

| Acc. Number | Gene Symbol | Description                                                                              | P-value | Known Human              | Known Other Species      | 17-ODYA | Protei Family                         |
|-------------|-------------|------------------------------------------------------------------------------------------|---------|--------------------------|--------------------------|---------|---------------------------------------|
| IPI00297124 | IL6ST       | Isoform 1 of Interleukin-6 receptor beta chain precursor                                 | 0.275   |                          |                          |         |                                       |
| IPI00554541 | ILVBL       | ilvB (bacterial acetolactate synthase)-like isoform 1                                    | 0.165   |                          |                          |         |                                       |
| IPI00215995 | ITGA3       | Isoform Alpha-3A of Integrin alpha-3 precursor                                           | 0.185   |                          |                          |         |                                       |
| IPI00010697 | ITGA6       | Isoform Alpha-6X1X2B of Integrin alpha-6 precursor                                       | 0.103   |                          |                          |         |                                       |
| IPI00031821 | ITM2B       | Integral membrane protein 2B                                                             | 0.275   |                          |                          |         |                                       |
| IPI00006130 | KIAA0494    | Uncharacterized calcium-binding protein KIAA0494                                         | 0.275   |                          |                          | M       |                                       |
| IPI00217007 | KIAA2013    | Novel protein                                                                            | 0.275   |                          |                          | M       |                                       |
| IPI00004503 | LAMP1       | lysosomal-associated membrane protein 1                                                  | 0.103   |                          |                          |         |                                       |
| IPI00103994 | LARS        | Leucyl-tRNA synthetase, cytoplasmic                                                      | 0.275   |                          |                          | H       |                                       |
| IPI00219219 | LGALS1      | Galectin-1                                                                               | 0.195   |                          |                          |         |                                       |
| IPI00020007 | LMBRD1      | LMBR1 domain containing 1                                                                | 0.275   |                          |                          |         |                                       |
| IPI00293336 | LOC153364   | similar to metallo-beta-lactamase superfamily protein                                    | 0.067   |                          |                          | M       |                                       |
| IPI00373972 | LOC388564   | PREDICTED: hypothetical protein                                                          | 0.103   |                          |                          |         |                                       |
| IPI00291695 | LOC493869   | CDNA FLJ23636 fis, clone CAS07176                                                        | 0.275   |                          |                          |         |                                       |
| IPI00414231 | LRP10       | Isoform 1 of Low-density lipoprotein receptor-related protein 10 precursor               | 0.103   |                          |                          |         | LDL receptor <a href="#">18378904</a> |
| IPI00007321 | LYPLA1      | Isoform 1 of Acyl-protein thioesterase 1                                                 | 0.275   |                          |                          |         |                                       |
| IPI00025049 | M6PR        | Cation-dependent mannose-6-phosphate receptor precursor                                  | 0.089   |                          | <a href="#">8647889</a>  | bovine  |                                       |
| IPI00396171 | MAP4        | Isoform 1 of Microtubule-associated protein 4                                            | 0.275   |                          |                          |         |                                       |
| IPI00090807 | METTLL7B    | Methyltransferase-like protein 7B precursor                                              | 0.165   |                          |                          |         |                                       |
| IPI00215610 | MPP1        | 55 kDa erythrocyte membrane protein                                                      | 0.165   | <a href="#">1713685</a>  |                          |         |                                       |
| IPI00017515 | MREG        | DSU protein                                                                              | 0.067   |                          |                          | M       |                                       |
| IPI00219365 | MSN         | Moesin                                                                                   | 0.089   |                          |                          |         |                                       |
| IPI00102685 | MYADM       | Myeloid-associated differentiation marker                                                | 0.275   |                          |                          | M       |                                       |
| IPI00023748 | NACA        | Nascent polypeptide-associated complex subunit alpha                                     | 0.165   |                          |                          |         |                                       |
| IPI00470649 | NCLN        | Isoform 1 of Nicalin precursor                                                           | 0.212   |                          |                          |         |                                       |
| IPI00021983 | NCSTN       | Isoform 1 of Nicastrin precursor                                                         | 0.103   | <a href="#">19028695</a> |                          |         |                                       |
| IPI00012235 | NDFIP1      | Isoform 1 of NEDD4 family-interacting protein 1                                          | 0.103   |                          |                          | M       |                                       |
| IPI00012048 | NME1        | Nucleoside diphosphate kinase A                                                          | 0.165   |                          |                          |         |                                       |
| IPI00304596 | NONO        | Non-POU domain-containing octamer-binding protein                                        | 0.165   |                          |                          | M       |                                       |
| IPI00005107 | NPC1        | Niemann-Pick C1 protein precursor                                                        | 0.228   |                          |                          |         |                                       |
| IPI00098902 | OGDH        | oxoglutarate (alpha-ketoglutarate) dehydrogenase (lipoamide) isoform 1 precursor         | 0.275   |                          |                          |         |                                       |
| IPI00020464 | PAG1        | Phosphoprotein associated with glycosphingolipid-enriched microdomains 1                 | 0.165   |                          | <a href="#">12626544</a> | Mouse   |                                       |
| IPI00869136 | PCNXL3      | Isoform 1 of Pecanex-like protein 3                                                      | 0.103   |                          |                          |         |                                       |
| IPI00306301 | PDHA1       | Pyruvate dehydrogenase E1 component alpha subunit, somatic form, mitochondrial precursor | 0.275   |                          |                          |         |                                       |
| IPI00293189 | PERP        | Isoform 1 of p53 apoptosis effector related to PMP-22                                    | 0.275   |                          |                          |         |                                       |
| IPI00549725 | PGAM1       | Phosphoglycerate mutase 1                                                                | 0.103   |                          |                          |         |                                       |
| IPI00017334 | PHB         | Prohibitin                                                                               | 0.103   |                          |                          |         |                                       |
| IPI00152701 | PLCD3       | phospholipase C delta 3                                                                  | 0.275   |                          |                          |         |                                       |
| IPI00030362 | PLP2        | Proteolipid protein 2                                                                    | 0.275   |                          |                          |         |                                       |
| IPI00419585 | PPIA        | Peptidyl-prolyl cis-trans isomerase A                                                    | 0.191   |                          |                          |         |                                       |
| IPI00004968 | PRPF19      | Pre-mRNA-processing factor 19                                                            | 0.242   |                          |                          | M       |                                       |
| IPI00029623 | PSMA6       | Proteasome subunit alpha type 6                                                          | 0.275   |                          |                          |         |                                       |
| IPI00103525 | PSPC1       | paraspeckle protein 1 isoform alpha                                                      | 0.275   |                          |                          |         |                                       |
| IPI00011651 | PTPRG       | Receptor-type tyrosine-protein phosphatase gamma precursor                               | 0.275   |                          |                          |         |                                       |
| IPI00016513 | RAB10       | Ras-related protein Rab-10                                                               | 0.231   |                          |                          |         | Ras-related                           |
| IPI00291928 | RAB14       | Ras-related protein Rab-14                                                               | 0.103   |                          |                          |         | Ras-related                           |
| IPI00008964 | RAB1B       | Ras-related protein Rab-1B                                                               | 0.180   |                          |                          | H       | Ras-related                           |
| IPI00102896 | RAB2B       | Ras-related protein Rab-2B                                                               | 0.275   |                          |                          |         | Ras-related                           |
| IPI00300096 | RAB35       | Ras-related protein Rab-35                                                               | 0.067   |                          |                          |         | Ras-related                           |
| IPI00023504 | RAB3A       | Ras-related protein Rab-3A                                                               | 0.103   |                          |                          |         | Ras-related                           |

| Acc. Number | Gene Symbol | Description                                                                                                                     | P-value | Known Human              | Known Other Species | 17-ODYA | Protei Family                                |
|-------------|-------------|---------------------------------------------------------------------------------------------------------------------------------|---------|--------------------------|---------------------|---------|----------------------------------------------|
| IPI00300562 | RAB3B       | Ras-related protein Rab-3B                                                                                                      | 0.103   |                          |                     |         | Ras-related                                  |
| IPI00032808 | RAB3D       | Ras-related protein Rab-3D                                                                                                      | 0.067   |                          |                     |         | Ras-related                                  |
| IPI00448725 | RAB4B       | RAB4B protein                                                                                                                   | 0.275   |                          |                     |         | Ras-related                                  |
| IPI00023526 | RAB6A       | RAB6A, member RAS oncogene family isoform b                                                                                     | 0.275   |                          |                     |         | Ras-related                                  |
| IPI00016891 | RAB6B       | Ras-related protein Rab-6B                                                                                                      | 0.165   |                          |                     |         | Ras-related                                  |
| IPI00028481 | RAB8A       | Ras-related protein Rab-8A                                                                                                      | 0.165   |                          |                     |         | Ras-related                                  |
| IPI00643041 | RAN         | GTP-binding nuclear protein Ran                                                                                                 | 0.103   |                          |                     |         | Ras-related                                  |
| IPI00015148 | RAP1B       | Ras-related protein Rap-1b precursor                                                                                            | 0.275   |                          |                     | M       | Ras-related                                  |
| IPI00031755 | RCE1        | CAAX prenyl protease 2                                                                                                          | 0.165   |                          |                     |         |                                              |
| IPI00024670 | REEP5       | Receptor expression-enhancing protein 5                                                                                         | 0.067   |                          |                     |         |                                              |
| IPI00103867 | RFFL        | Isoform 1 of Riffylin                                                                                                           | 0.103   |                          |                     |         |                                              |
| IPI00027434 | RHOC        | Rho-related GTP-binding protein RhoC precursor                                                                                  | 0.103   |                          |                     |         | Rho                                          |
| IPI00017342 | RHOG        | Rho-related GTP-binding protein RhoG precursor                                                                                  | 0.130   |                          |                     |         | Rho                                          |
| IPI00023511 | RNF167      | RING finger protein 167 precursor                                                                                               | 0.275   |                          |                     |         |                                              |
| IPI00010405 | ROR1        | Isoform Long of Tyrosine-protein kinase transmembrane receptor ROR1 precursor                                                   | 0.165   |                          |                     |         |                                              |
| IPI00026627 | RP2         | Protein XRP2                                                                                                                    | 0.103   | <a href="#">10942419</a> |                     |         |                                              |
| IPI00020127 | RPA1        | Replication protein A 70 kDa DNA-binding subunit                                                                                | 0.195   |                          |                     |         |                                              |
| IPI00412579 | RPL10A      | 60S ribosomal protein L10a                                                                                                      | 0.103   |                          |                     | M       |                                              |
| IPI00024933 | RPL12       | 60S ribosomal protein L12                                                                                                       | 0.202   |                          |                     | M       |                                              |
| IPI00304612 | RPL13A      | 60S ribosomal protein L13a                                                                                                      | 0.275   |                          |                     |         |                                              |
| IPI00215719 | RPL18       | 60S ribosomal protein L18                                                                                                       | 0.275   |                          |                     |         |                                              |
| IPI00000494 | RPL5        | 60S ribosomal protein L5                                                                                                        | 0.275   |                          |                     | M       |                                              |
| IPI00012772 | RPL8        | 60S ribosomal protein L8                                                                                                        | 0.275   |                          |                     |         |                                              |
| IPI00031691 | RPL9        | 60S ribosomal protein L9                                                                                                        | 0.212   |                          |                     |         |                                              |
| IPI00301271 | RPN2        | Dolichyl-diphosphooligosaccharide--protein glycosyltransferase 63 kDa subunit precursor                                         | 0.067   |                          |                     |         |                                              |
| IPI00025091 | RPS11       | 40S ribosomal protein S11                                                                                                       | 0.103   |                          |                     |         |                                              |
| IPI00221091 | RPS15A      | 40S ribosomal protein S15a                                                                                                      | 0.103   |                          |                     |         |                                              |
| IPI00012493 | RPS20       | 40S ribosomal protein S20                                                                                                       | 0.067   |                          |                     |         |                                              |
| IPI00179330 | RPS27A      | ubiquitin and ribosomal protein S27a precursor                                                                                  | 0.116   |                          |                     |         |                                              |
| IPI00419880 | RPS3A       | 40S ribosomal protein S3a                                                                                                       | 0.067   |                          |                     | M       |                                              |
| IPI00008433 | RPS5        | 40S ribosomal protein S5                                                                                                        | 0.245   |                          |                     | H       |                                              |
| IPI00221088 | RPS9        | 40S ribosomal protein S9                                                                                                        | 0.275   |                          |                     | M       |                                              |
| IPI00106642 | SDF2L1      | Dihydropyrimidinase-like 2                                                                                                      | 0.275   |                          |                     |         |                                              |
| IPI00006865 | SEC22B      | Vesicle-trafficking protein SEC22b                                                                                              | 0.275   |                          |                     |         |                                              |
| IPI00185533 | SEH1L       | Isoform A of Nucleoporin SEH1-like                                                                                              | 0.275   |                          |                     |         |                                              |
| IPI00019376 | SEPT11      | Septin-11                                                                                                                       | 0.275   |                          |                     |         |                                              |
| IPI00033025 | SEPT7       | Septin-7                                                                                                                        | 0.130   |                          |                     |         |                                              |
| IPI00413817 | SERINC1     | Serine incorporator 1                                                                                                           | 0.165   |                          |                     |         |                                              |
| IPI00166444 | SFT2D3      | Vesicle transport protein SFT2C                                                                                                 | 0.275   |                          |                     | M       |                                              |
| IPI00009368 | SFXN1       | Sideroflexin-1                                                                                                                  | 0.165   |                          |                     |         |                                              |
| IPI00007188 | SLC25A5     | ADP/ATP translocase 2                                                                                                           | 0.165   |                          |                     |         |                                              |
| IPI00179969 | SLC2A6      | CDNA FLJ90355 fis, clone NT2RP2003469, moderately similar to Solute carrier family 2, facilitated glucose transporter, member 6 | 0.275   |                          |                     |         |                                              |
| IPI00784764 | SLC30A1     | solute carrier family 30 (zinc transporter), member 1                                                                           | 0.103   |                          |                     |         |                                              |
| IPI00100585 | SLC39A1     | Zinc transporter ZIP1                                                                                                           | 0.275   |                          |                     |         |                                              |
| IPI00293074 | SLC44A2     | Isoform 2 of Choline transporter-like protein 2                                                                                 | 0.275   |                          |                     |         |                                              |
| IPI00043883 | SLC46A1     | Isoform 1 of Heme carrier protein 1                                                                                             | 0.165   |                          |                     |         |                                              |
| IPI00383597 | SLC4A2      | Isoform A of Anion exchange protein 2                                                                                           | 0.275   |                          |                     |         | Homologous to SLC4A1 <a href="#">1885574</a> |
| IPI00100858 | SLCO4A1     | Isoform 1 of Solute carrier organic anion transporter family member 4A1                                                         | 0.103   |                          |                     |         |                                              |

| Acc. Number | Gene Symbol | Description                                                                              | P-value | Known Human              | Known Other Species | 17-ODYA | Protei Family                          |
|-------------|-------------|------------------------------------------------------------------------------------------|---------|--------------------------|---------------------|---------|----------------------------------------|
| IPI00291939 | SMC1A       | Structural maintenance of chromosome 1-like 1 protein                                    | 0.275   |                          |                     |         |                                        |
| IPI00012913 | SPRY2       | SPRY2 protein                                                                            | 0.275   |                          |                     |         |                                        |
| IPI00005745 | SPTLC1      | Serine palmitoyltransferase 1                                                            | 0.275   |                          |                     |         |                                        |
| IPI00334190 | STOML2      | Stomatin-like protein 2                                                                  | 0.067   |                          |                     | M       | Stomatin-like <a href="#">10338112</a> |
| IPI00293402 | STX10       | Syntaxin-10                                                                              | 0.165   |                          |                     | H       | Syntaxin <a href="#">15973437</a>      |
| IPI00289876 | STX7        | syntaxin 7                                                                               | 0.275   | <a href="#">18980942</a> |                     | M       | Syntaxin <a href="#">15973437</a>      |
| IPI00297626 | STXBP3      | Syntaxin-binding protein 3                                                               | 0.067   |                          |                     |         |                                        |
| IPI00550363 | TAGLN2      | Transgelin-2                                                                             | 0.275   |                          |                     |         |                                        |
| IPI00646625 | TAP1        | transporter 1, ATP-binding cassette, sub-family B                                        | 0.165   |                          |                     | H       |                                        |
| IPI00290566 | TCP1        | T-complex protein 1 subunit alpha                                                        | 0.248   |                          |                     |         |                                        |
| IPI00170706 | TMEM2       | Transmembrane protein 2                                                                  | 0.242   |                          |                     |         |                                        |
| IPI00030530 | TMEM55B     | Isoform 1 of Transmembrane protein 55B                                                   | 0.067   |                          |                     | M       |                                        |
| IPI00006006 | TMEM63A     | Transmembrane protein 63A                                                                | 0.103   |                          |                     | M       |                                        |
| IPI00294516 | TNFRSF10D   | Tumor necrosis factor receptor superfamily member 10D precursor                          | 0.067   |                          |                     |         | TNF receptor <a href="#">17159908</a>  |
| IPI00014053 | TOMM40      | Isoform 1 of Probable mitochondrial import receptor subunit TOM40 homolog                | 0.275   |                          |                     | H       |                                        |
| IPI00165394 | TSPAN14     | Isoform 2 of Tetraspanin-14                                                              | 0.165   |                          |                     |         | Tetraspanin <a href="#">11907260</a>   |
| IPI00024174 | TSPAN4      | Tetraspanin-4                                                                            | 0.275   |                          |                     |         | Tetraspanin <a href="#">11907260</a>   |
| IPI00027437 | TSPAN9      | Tetraspanin-9                                                                            | 0.103   |                          |                     |         | Tetraspanin <a href="#">11907260</a>   |
| IPI00470779 | TXLNA       | Alpha-taxilin                                                                            | 0.275   |                          |                     |         |                                        |
| IPI00329596 | TXNDC14     | CDNA PSEC0045 fis, clone NT2RP1001023                                                    | 0.275   |                          |                     |         |                                        |
| IPI00157820 | TXNRD2      | Isoform 2 of Thioredoxin reductase 2, mitochondrial precursor                            | 0.275   |                          |                     |         |                                        |
| IPI00026669 | UBL3        | Ubiquitin-like protein 3 precursor                                                       | 0.067   |                          |                     |         |                                        |
| IPI00157729 | UBTD2       | Ubiquitin domain-containing protein 2                                                    | 0.275   |                          |                     |         |                                        |
| IPI00219648 | VAMP4       | Isoform 2 of Vesicle-associated membrane protein 4                                       | 0.103   |                          |                     | H       | Synaptobrevin                          |
| IPI00746165 | WDR1        | WD repeat-containing protein 1 isoform 1                                                 | 0.275   |                          |                     |         |                                        |
| IPI00216318 | YWHAB       | tyrosine 3-monooxygenase/tryptophan 5-monooxygenase activation protein, beta polypeptide | 0.165   |                          |                     |         |                                        |
| IPI00000816 | YWHAE       | 14-3-3 protein epsilon                                                                   | 0.067   |                          |                     |         |                                        |
| IPI00018146 | YWHAQ       | 14-3-3 protein theta                                                                     | 0.275   |                          |                     |         |                                        |
| IPI00062698 | ZDHHC12     | Isoform 1 of Probable palmitoyltransferase ZDHHC12                                       | 0.103   |                          |                     |         | DHHC protein                           |
| IPI00008350 | ZDHHC6      | Isoform 1 of Probable palmitoyltransferase ZDHHC6                                        | 0.275   |                          |                     | H       | DHHC protein                           |
| IPI00333858 | ZFR         | 117 kDa protein                                                                          | 0.275   |                          |                     |         |                                        |

**Note 1.** Acc. Number = Accession Number (see the 1st column).

**Note 2.** Candidate S-acylated proteins with high (H) or medium (M) confidence (PMID: 19137006) (see the 8th column).

**Table S4. S-acylation sites cannot be confidently localized on a large scale by using the protein-based procedure.**

| No. | Sequence                      | Fraction | Biological Replicates |         |         |         | Gene Symbol | Acc.Number  | Description                                                                                           | Site | Reference | Known Sites | Organism      |
|-----|-------------------------------|----------|-----------------------|---------|---------|---------|-------------|-------------|-------------------------------------------------------------------------------------------------------|------|-----------|-------------|---------------|
|     |                               |          | 1st EXP               | 1st CON | 2nd EXP | 2nd CON |             |             |                                                                                                       |      |           |             |               |
| 1   | MALGTLALVLAALPQR              | Non-raft | 1                     | 0       | 0       | 0       | ABCB6       | IPI00065486 | CDNA FLJ32464 fis, clone SKNMC1000251, highly similar to Homo sapiens MT-ABC transporter (MTABC) mRNA | 50   |           |             |               |
| 2   | CPEALFQPSFLGMESCIGIHETTFNSIMK | Non-raft | 2                     | 1       | 0       | 0       | ACTB        | IPI00021439 | Actin, cytoplasmic 1                                                                                  | 257  | 16453612  | -           | Dictyostelium |
|     |                               | Raft     | 2                     | 1       | 0       | 0       | ACTB        | IPI00021439 | Actin, cytoplasmic 1                                                                                  | 257  |           |             |               |
|     |                               | Non-raft | 2                     | 1       | 0       | 0       | ACTG1       | IPI00021440 | Actin, cytoplasmic 2                                                                                  | 257  | 16453612  | -           | Dictyostelium |
|     |                               | Raft     | 2                     | 1       | 0       | 0       | ACTG1       | IPI00021440 | Actin, cytoplasmic 2                                                                                  | 257  |           |             |               |
| 3   | CPEALFQPSFLGMESCIGIHETTFNSIMK | Raft     | 1                     | 0       | 0       | 0       | ACTB        | IPI00021439 | Actin, cytoplasmic 1                                                                                  | 272  |           |             |               |
|     |                               | Raft     | 1                     | 0       | 0       | 0       | ACTG1       | IPI00021440 | Actin, cytoplasmic 2                                                                                  | 272  |           |             |               |
| 4   | LCYVALDFEQEMATAASSSSLEK       | Non-raft | 1                     | 2       | 0       | 0       | ACTB        | IPI00021439 | Actin, cytoplasmic 1                                                                                  | 217  |           |             |               |
|     |                               | Raft     | 2                     | 1       | 0       | 0       | ACTB        | IPI00021439 | Actin, cytoplasmic 1                                                                                  | 217  |           |             |               |
|     |                               | Non-raft | 1                     | 2       | 0       | 0       | ACTG1       | IPI00021440 | Actin, cytoplasmic 2                                                                                  | 217  |           |             |               |
|     |                               | Raft     | 2                     | 1       | 0       | 0       | ACTG1       | IPI00021440 | Actin, cytoplasmic 2                                                                                  | 217  |           |             |               |
| 5   | DDDIAALVVDNGSGMCK             | Non-raft | 3                     | 4       | 1       | 3       | ACTB        | IPI00021439 | Actin, cytoplasmic 1                                                                                  | 17   |           |             |               |
|     |                               | Raft     | 4                     | 3       | 4       | 2       | ACTB        | IPI00021439 | Actin, cytoplasmic 1                                                                                  | 17   |           |             |               |
| 6   | EEEIAALVIDNGSGMCK             | Non-raft | 4                     | 4       | 1       | 2       | ACTG1       | IPI00021440 | Actin, cytoplasmic 2                                                                                  | 17   |           |             |               |
|     |                               | Raft     | 4                     | 1       | 1       | 2       | ACTG1       | IPI00021440 | Actin, cytoplasmic 2                                                                                  | 17   |           |             |               |
| 7   | ICDQWDNLGALTQK                | Raft     | 1                     | 0       | 0       | 0       | ACTN1       | IPI00013508 | Alpha-actinin-1                                                                                       | 480  |           |             |               |
| 8   | FSLCSIR                       | Non-raft | 0                     | 0       | 1       | 0       | ADAM10      | IPI00013897 | ADAM 10 precursor                                                                                     | 435  |           |             |               |
| 9   | TITLQPGSPCNDFR                | Non-raft | 1                     | 0       | 0       | 0       | ADAM10      | IPI00013897 | ADAM 10 precursor                                                                                     | 632  |           |             |               |
| 10  | NCQFETAQKK                    | Non-raft | 1                     | 0       | 0       | 0       | ADAM17      | IPI00029606 | Isoform B of ADAM 17 precursor                                                                        | 525  |           |             |               |
| 11  | LVDAGEECDCGTPK                | Non-raft | 1                     | 0       | 0       | 0       | ADAM9       | IPI00440932 | Isoform 1 of ADAM 9 precursor                                                                         | 428  |           |             |               |
| 12  | LVDAGEECDCGTPK                | Non-raft | 0                     | 1       | 0       | 0       | ADAM9       | IPI00440932 | Isoform 1 of ADAM 9 precursor                                                                         | 430  |           |             |               |
| 13  | AYGTGFVGCCLR                  | Non-raft | 0                     | 1       | 0       | 0       | AGRN        | IPI00374563 | Agrin precursor                                                                                       | 2016 |           |             |               |
| 14  | ALANSLACQ GK                  | Non-raft | 1                     | 1       | 0       | 1       | ALDOA       | IPI00465439 | Fructose-bisphosphate aldolase A                                                                      | 339  |           |             |               |
| 15  | ALSDHHIYLEGTLKPNMVPGHACTQK    | Non-raft | 1                     | 0       | 0       | 0       | ALDOA       | IPI00465439 | Fructose-bisphosphate aldolase A                                                                      | 240  |           |             |               |
| 16  | CPLLKPWALTFYGR                | Non-raft | 0                     | 0       | 1       | 0       | ALDOA       | IPI00465439 | Fructose-bisphosphate aldolase A                                                                      | 290  |           |             |               |
| 17  | YASICQQNGIVPIVEPEILPDGDHDLKR  | Non-raft | 0                     | 1       | 0       | 1       | ALDOA       | IPI00465439 | Fructose-bisphosphate aldolase A                                                                      | 178  |           |             |               |
| 18  | TVAA CNLPVIR                  | Non-raft | 0                     | 0       | 0       | 2       | AMBP        | IPI00022426 | AMBP protein precursor                                                                                | 287  |           |             |               |
|     |                               | Raft     | 0                     | 0       | 0       | 1       | AMBP        | IPI00022426 | AMBP protein precursor                                                                                | 287  |           |             |               |
| 19  | GDLNFAFLNLVQCINPKPLYFADR      | Non-raft | 1                     | 0       | 2       | 0       | ANXA2       | IPI00418169 | annexin A2 isoform 1                                                                                  | 280  |           |             |               |
| 20  | GLGTDEDSLIEICSR               | Non-raft | 1                     | 0       | 0       | 0       | ANXA2       | IPI00418169 | annexin A2 isoform 1                                                                                  | 151  |           |             |               |
|     |                               | Raft     | 1                     | 1       | 0       | 0       | ANXA2       | IPI00418169 | annexin A2 isoform 1                                                                                  | 151  |           |             |               |
|     |                               | Non-raft | 2                     | 0       | 0       | 0       | ANXA2P2     | IPI00334627 | Similar to annexin A2 isoform 1                                                                       | 133  |           |             |               |
| 21  | STVHEILCK                     | Raft     | 1                     | 0       | 1       | 0       | ANXA2       | IPI00418169 | annexin A2 isoform 1                                                                                  | 27   |           |             |               |
| 22  | LCSESPDNVSTTGFSIK             | Non-raft | 0                     | 0       | 2       | 0       | ARL15       | IPI00005163 | ARFRP2 protein                                                                                        | 53   |           |             |               |
| 23  | YCAGEENWVDSR                  | Non-raft | 0                     | 0       | 1       | 0       | ATP11A      | IPI00255653 | Probable phospholipid-transporting ATPase 1H                                                          | 14   |           |             |               |
| 24  | NYLEPGKECVQPATK               | Non-raft | 1                     | 1       | 0       | 0       | ATP2A2      | IPI00219078 | Isoform SERCA2B of Sarcoplasmic/endoplasmic reticulum calcium ATPase 2                                | 997  |           |             |               |
| 25  | SMSVYCTPNKPSR                 | Non-raft | 1                     | 1       | 0       | 0       | ATP2A2      | IPI00219078 | Isoform SERCA2B of Sarcoplasmic/endoplasmic reticulum calcium ATPase 2                                | 498  |           |             |               |
| 26  | VGEATETALTCLVEK               | Non-raft | 1                     | 1       | 0       | 0       | ATP2A2      | IPI00219078 | Isoform SERCA2B of Sarcoplasmic/endoplasmic reticulum calcium ATPase 2                                | 447  |           |             |               |
| 27  | VSFYQLSHFLQCK                 | Non-raft | 1                     | 0       | 0       | 0       | ATP2A2      | IPI00219078 | Isoform SERCA2B of Sarcoplasmic/endoplasmic reticulum calcium ATPase 2                                | 875  |           |             |               |

| No. | Sequence                 | Fraction | Biological Replicates |         |         |         | Gene Symbol | Acc.Number  | Description                                                     | Site        | Reference                | Known Sites        | Organism |
|-----|--------------------------|----------|-----------------------|---------|---------|---------|-------------|-------------|-----------------------------------------------------------------|-------------|--------------------------|--------------------|----------|
|     |                          |          | 1st EXP               | 1st CON | 2nd EXP | 2nd CON |             |             |                                                                 |             |                          |                    |          |
| 28  | LLSCVVLGPR               | Non-raft | 1                     | 0       | 0       | 0       | BAT5        | IPI00033075 | Protein BAT5                                                    | 7           |                          |                    |          |
| 29  | EGDEVTLIC SAR            | Non-raft | 1                     | 0       | 0       | 0       | BCAM        | IPI00002406 | Lutheran blood group glycoprotein precursor                     | 473         |                          |                    |          |
| 30  | EGDTVQLLC R              | Non-raft | 2                     | 0       | 0       | 0       | BCAM        | IPI00002406 | Lutheran blood group glycoprotein precursor                     | 291         |                          |                    |          |
| 31  | GQSGTYGCRVEDYDAADDVQLSK  | Non-raft | 1                     | 0       | 0       | 0       | BCAM        | IPI00002406 | Lutheran blood group glycoprotein precursor                     | 337         |                          |                    |          |
| 32  | LVLAEAQVGDERDYVCVVR      | Non-raft | 1                     | 0       | 1       | 0       | BCAM        | IPI00002406 | Lutheran blood group glycoprotein precursor                     | 125         |                          |                    |          |
| 33  | LVELFC SR                | Non-raft | 1                     | 0       | 0       | 0       | BCL2L12     | IPI00019835 | Isoform 1 of Bcl-2-related proline-rich protein                 | 254         |                          |                    |          |
| 34  | TPCNAGTFSQPEK            | Raft     | 1                     | 0       | 0       | 0       | BUB3        | IPI00013468 | Mitotic checkpoint protein BUB3                                 | 129         |                          |                    |          |
| 35  | ATSVLCC LR               | Non-raft | 1                     | 0       | 1       | 0       | C13orf1     | IPI00030959 | 24 kDa protein                                                  | 7/8         |                          |                    |          |
| 36  | YL RDVNC PFK             | Raft     | 1                     | 0       | 0       | 0       | C14orf166   | IPI00006980 | Protein C14orf166                                               | 69          |                          |                    |          |
| 37  | AATSTLSVCD FLG EK        | Non-raft | 1                     |         | 0       |         | C14orf24    | IPI00166051 | Uncharacterized protein C14orf24                                | 114         |                          |                    |          |
| 38  | CESAPGCGVWQRVIDNPNYK     | Non-raft | 1                     | 0       | 2       | 0       | CANX        | IPI00020984 | Calnexin precursor                                              | 360         | <a href="#">18350545</a> | 503/504            | Mouse    |
| 39  | CESAPGCGVWQRVIDNPNYK     | Non-raft | 2                     | 0       | 0       | 0       | CANX        | IPI00020984 | Calnexin precursor                                              | 366         |                          |                    |          |
| 40  | CGEDYKLFHIFR             | Non-raft | 0                     | 0       | 1       | 0       | CANX        | IPI00020984 | Calnexin precursor                                              | 194         |                          |                    |          |
| 41  | SFLIEIQCISR              | Non-raft | 0                     | 0       | 1       | 0       | CAV1        | IPI00009236 | caveolin 1                                                      | 143         | <a href="#">11451957</a> | 133/143/156        | Human    |
|     |                          | Raft     | 1                     | 0       | 0       | 0       | CAV1        | IPI00009236 | caveolin 1                                                      | 143         |                          |                    |          |
| 42  | CFSSVSLQLSQD             | Non-raft | 0                     | 0       | 1       | 0       | CAV2        | IPI00019870 | Isoform Alpha of Caveolin-2                                     | 151         |                          |                    |          |
|     |                          | Raft     | 1                     | 0       | 1       | 0       | CAV2        | IPI00019870 | Isoform Alpha of Caveolin-2                                     | 151         |                          |                    |          |
| 43  | SVTDVIIAPLCTSVGR         | Non-raft | 0                     | 0       | 1       | 0       | CAV2        | IPI00019870 | Isoform Alpha of Caveolin-2                                     | 145         |                          |                    |          |
|     |                          | Raft     | 1                     | 0       | 2       | 0       | CAV2        | IPI00019870 | Isoform Alpha of Caveolin-2                                     | 145         |                          |                    |          |
| 44  | TCLMVLPSVQTIWK           | Non-raft | 0                     | 0       | 2       | 0       | CAV2        | IPI00019870 | Isoform Alpha of Caveolin-2                                     | 122         |                          |                    |          |
|     |                          | Raft     | 0                     | 0       | 1       | 0       | CAV2        | IPI00019870 | Isoform Alpha of Caveolin-2                                     | 122         |                          |                    |          |
| 45  | SQEAGGRVVPDSCCK          | Non-raft | 1                     | 0       | 0       | 0       | CD151       | IPI00298851 | CD151 antigen                                                   | 184         | <a href="#">11907260</a> | 11/15/242/243      |          |
| 46  | TVVALCGQR                | Non-raft | 1                     | 0       | 3       | 0       | CD151       | IPI00298851 | CD151 antigen                                                   | 192         |                          |                    |          |
| 47  | ALSIGFETCR               | Non-raft | 0                     | 0       | 1       | 0       | CD44        | IPI00297160 | CD44 antigen isoform 4 precursor                                | 28          | <a href="#">16945930</a> | 286/295            |          |
| 48  | YSISRTEAADLCK            | Non-raft | 1                     | 0       | 0       | 0       | CD44        | IPI00297160 | CD44 antigen isoform 4 precursor                                | 53          |                          |                    |          |
| 49  | AIHKEGCV EK              | Non-raft | 1                     | 0       | 0       | 0       | CD63        | IPI00215998 | CD63 antigen                                                    | 191         | <a href="#">11959120</a> | -                  |          |
| 50  | HHPTTLAVGICSPASR         | Non-raft | 2                     | 0       | 0       | 0       | CD70        | IPI00031713 | Tumor necrosis factor ligand superfamily member 7               | 133         |                          |                    |          |
| 51  | LSFHQGC TIASQR           | Non-raft | 2                     | 0       | 0       | 0       | CD70        | IPI00031713 | Tumor necrosis factor ligand superfamily member 7               | 151         |                          |                    |          |
| 52  | RRPYGCVLR                | Non-raft | 1                     | 0       | 0       | 0       | CD70        | IPI00031713 | Tumor necrosis factor ligand superfamily member 7               | 17          |                          |                    |          |
| 53  | AIHYALNCCGLAGGVEQFISDIPK | Non-raft | 1                     | 0       | 0       | 0       | CD9         | IPI00215997 | CD9 antigen                                                     | 152/153/167 | <a href="#">11959120</a> | 9/78/79/87/218/219 | Human    |
| 54  | AIHYALNCCGLAGGVEQFISDIPK | Non-raft | 2                     | 0       | 3       | 0       | CD9         | IPI00215997 | CD9 antigen                                                     | 152         |                          |                    |          |
| 55  | AIHYALNCCGLAGGVEQFISDIPK | Non-raft | 0                     | 0       | 3       | 0       | CD9         | IPI00215997 | CD9 antigen                                                     | 152/153     |                          |                    |          |
| 56  | AIHYALNCCGLAGGVEQFISDIPK | Non-raft | 0                     | 0       | 2       | 0       | CD9         | IPI00215997 | CD9 antigen                                                     | 167         |                          |                    |          |
| 57  | AIHYALNCCGLAGGVEQFISDIPK | Non-raft | 0                     | 0       | 1       | 0       | CD9         | IPI00215997 | CD9 antigen                                                     | 152/167     |                          |                    |          |
| 58  | YVEC SALTQK              | Non-raft | 1                     | 0       | 0       | 1       | CDC42       | IPI00016786 | Isoform 2 of Cell division control protein 42 homolog precursor | 157         |                          |                    |          |
| 59  | CLEDEVQKMR               | Non-raft | 1                     | 0       | 0       | 0       | CLDN1       | IPI00000691 | Claudin-1                                                       | 107         |                          |                    |          |
| 60  | GFLNQPDVELYQGLWDMCR      | Raft     | 1                     | 0       | 0       | 0       | CLDN23      | IPI00059710 | Claudin-23                                                      | 53          |                          |                    |          |
| 61  | IGNCPFSQR                | Non-raft | 1                     | 0       | 0       | 0       | CLIC1       | IPI00010896 | Chloride intracellular channel protein 1                        | 24          |                          |                    |          |
|     |                          | Non-raft | 1                     | 0       | 0       | 0       | CLIC4       | IPI00001960 | Chloride intracellular channel protein 4                        | 35          |                          |                    |          |
| 62  | GTVLLADNVICPGAPFLAHR     | Non-raft | 1                     | 0       | 0       | 0       | COMT        | IPI00011284 | Isoform Membrane-bound of Catechol O-methyltransferase          | 223         |                          |                    |          |
| 63  | LITIEINPDCAAITQR         | Non-raft | 0                     | 0       | 1       | 0       | COMT        | IPI00011284 | Isoform Membrane-bound of Catechol O-methyltransferase          | 145         |                          |                    |          |
| 64  | YLPDTLLLEECGLLR          | Non-raft | 0                     | 0       | 1       | 0       | COMT        | IPI00011284 | Isoform Membrane-bound of Catechol O-methyltransferase          | 207         |                          |                    |          |
| 65  | CDLISIPK                 | Non-raft | 1                     | 0       | 0       | 0       | CORO1C      | IPI00008453 | Coronin-1C                                                      | 473         |                          |                    |          |

| No. | Sequence                               | Fraction | Biological Replicates |         |         |         | Gene Symbol   | Acc.Number  | Description                                                   | Site    | Reference                | Known Sites | Organism |
|-----|----------------------------------------|----------|-----------------------|---------|---------|---------|---------------|-------------|---------------------------------------------------------------|---------|--------------------------|-------------|----------|
|     |                                        |          | 1st EXP               | 1st CON | 2nd EXP | 2nd CON |               |             |                                                               |         |                          |             |          |
|     |                                        | Raft     | 1                     | 1       | 0       | 1       | CORO1C        | IPI00008453 | Coronin-1C                                                    | 473     |                          |             |          |
| 66  | GLDVNKCEIAR                            | Raft     | 1                     | 1       | 0       | 0       | CORO1C        | IPI00008453 | Coronin-1C                                                    | 383     |                          |             |          |
| 67  | SIKDTICNQDER                           | Raft     | 1                     | 1       | 0       | 0       | CORO1C        | IPI00008453 | Coronin-1C                                                    | 509     |                          |             |          |
| 68  | VTWDSFCAVNPR                           | Raft     | 0                     | 0       | 1       | 0       | CORO1C        | IPI00008453 | Coronin-1C                                                    | 92      |                          |             |          |
| 69  | SILSSFFCCFR                            | Non-raft | 0                     | 0       | 1       | 0       | CTDSPL        | IPI00024826 | CTD small phosphatase-like protein. Splice isoform 2          | 123/124 |                          |             |          |
| 70  | HIEWESVLTNTAGCLR                       | Non-raft | 0                     | 0       | 1       | 0       | CTNND1        | IPI00182469 | Isoform 1AB of Catenin delta-1                                | 533     |                          |             |          |
| 71  | YQEAAPNVANNTGPHAASCFGAK                | Non-raft | 1                     | 0       | 2       | 0       | CTNND1        | IPI00182469 | Isoform 1AB of Catenin delta-1                                | 618     |                          |             |          |
|     |                                        | Raft     | 1                     | 0       | 0       | 0       | CTNND1        | IPI00182469 | Isoform 1AB of Catenin delta-1                                | 618     |                          |             |          |
| 72  | AKGETAYLPCCK                           | Non-raft | 1                     | 0       | 0       | 0       | CXADR         | IPI00019146 | Isoform 1 of Coxsackievirus and adenovirus receptor precursor | 41      | <a href="#">12021372</a> | 259/260     | Human    |
| 73  | CYVDGSEEIGSDFK                         | Non-raft | 0                     | 0       | 2       | 0       | CXADR         | IPI00019146 | Isoform 1 of Coxsackievirus and adenovirus receptor precursor | 146     |                          |             |          |
| 74  | VGSDQCLLR                              | Non-raft | 3                     | 0       | 1       | 0       | CXADR         | IPI00019146 | Isoform 1 of Coxsackievirus and adenovirus receptor precursor | 223     |                          |             |          |
| 75  | FGCCSAAHYSAK                           | Non-raft | 1                     | 0       | 0       | 0       | DAGLB         | IPI00385987 | Isoform 1 of Sn1-specific diacylglycerol lipase beta          | 610/611 |                          |             |          |
| 76  | AISADSIDGICAR                          | Raft     | 1                     | 0       | 0       | 0       | DCUN1D3       | IPI00217282 | DCN1, defective in cullin neddylation 1, domain containing 3  | 163     |                          |             |          |
| 77  | QDLGGTCVNEGCIPTK                       | Non-raft | 1                     | 0       | 0       | 0       | DERP12        | IPI00382990 | DERP12                                                        | 50      |                          |             |          |
|     |                                        | Raft     | 2                     | 0       | 1       | 1       | DERP12        | IPI00382990 | DERP12                                                        | 50      |                          |             |          |
| 78  | QDLGGTCVNEGCIPTK                       | Raft     | 3                     | 3       | 2       | 1       | DERP12        | IPI00382990 | DERP12                                                        | 45      |                          |             |          |
| 79  | QDLGGTCVNEGCIPTK                       | Raft     | 2                     | 0       | 1       | 1       | DERP12        | IPI00382990 | DERP12                                                        | 45/50   |                          |             |          |
| 80  | LAAQSCALSLVR                           | Raft     | 0                     | 1       | 0       | 0       | DHX9          | IPI00844578 | ATP-dependent RNA helicase A                                  | 242     |                          |             |          |
| 81  | HQGVVMVGMGQKDCYVGDEAQS                 | Raft     | 0                     | 1       | 0       | 0       | DKFZp686D0972 | IPI00003269 | hypothetical protein LOC345651                                | 53      |                          |             |          |
| 82  | IHSDCAANQVQTYR                         | Non-raft | 0                     | 2       | 0       | 0       | DSG1          | IPI00025753 | Desmoglein-1 precursor                                        | 77      |                          |             |          |
| 83  | TLAEVCLGQK                             | Raft     | 0                     | 0       | 1       | 0       | DSG2          | IPI00028931 | desmoglein 2 preproprotein                                    | 840     |                          |             |          |
| 84  | CLLNMYMIWNLVR                          | Non-raft | 1                     | 0       | 0       | 0       | ECE1          | IPI00216760 | Isoform C of Endothelin-converting enzyme 1                   | 372     | <a href="#">10359648</a> | 42          | Human    |
| 85  | FCVSDTENNLGFALGPMFVK                   | Non-raft | 0                     | 0       | 1       | 0       | ECE1          | IPI00216760 | Isoform C of Endothelin-converting enzyme 1                   | 419     |                          |             |          |
| 86  | ICPVETLVEEAIQCAEK                      | Non-raft | 1                     | 0       | 0       | 0       | ECHS1         | IPI00024993 | Enoyl-CoA hydratase, mitochondrial precursor                  | 213     |                          |             |          |
| 87  | NMITGTSQADCAVLIVAAGVGEFEAGISK          | Non-raft | 0                     | 0       | 2       | 0       | EEF1A1        | IPI00396485 | Elongation factor 1-alpha 1                                   | 111     |                          |             |          |
|     |                                        | Non-raft | 0                     | 0       | 2       | 0       | EEF1A2        | IPI00014424 | Elongation factor 1-alpha 2                                   | 111     |                          |             |          |
| 88  | WFLTICINQPQFR                          | Non-raft | 1                     | 0       | 1       | 0       | EEF1G         | IPI00000875 | Elongation factor 1-gamma                                     | 194     |                          |             |          |
|     |                                        | Raft     | 1                     | 1       | 1       | 0       | EEF1G         | IPI00000875 | Elongation factor 1-gamma                                     | 194     |                          |             |          |
| 89  | KIWCFGPDGTGNILTDITK                    | Non-raft | 0                     | 0       | 1       | 0       | EEF2          | IPI00186290 | Elongation factor 2                                           | 651     |                          |             |          |
| 90  | LMEPIYLVEIQCEQVVGGIYGVNLNR             | Non-raft | 0                     | 0       | 1       | 0       | EEF2          | IPI00186290 | Elongation factor 2                                           | 751     |                          |             |          |
| 91  | TFQQLLDPIFK                            | Non-raft | 1                     | 1       | 1       | 1       | EEF2          | IPI00186290 | Elongation factor 2                                           | 350     |                          |             |          |
| 92  | YVEPIEDVPCGNIVGLVGDQFLVK               | Non-raft | 1                     | 1       | 0       | 0       | EEF2          | IPI00186290 | Elongation factor 2                                           | 466     |                          |             |          |
| 93  | IVLTNPVCTEVGEK                         | Non-raft | 1                     | 0       | 0       | 0       | EIF2S3        | IPI00297982 | Eukaryotic translation initiation factor 2 subunit 3          | 434     |                          |             |          |
| 94  | SFDVKNKPGCEVDDLKGGVAGGSILK             | Raft     | 1                     | 0       | 0       | 0       | EIF2S3        | IPI00297982 | Eukaryotic translation initiation factor 2 subunit 3          | 269     |                          |             |          |
| 95  | VNQIGSVTESIQACK                        | Non-raft | 1                     | 1       | 1       | 0       | ENO1          | IPI00465248 | enolase 1                                                     | 357     |                          |             |          |
|     |                                        | Non-raft | 1                     | 1       | 1       | 0       | ENO3          | IPI00218474 | Beta-enolase                                                  | 357     |                          |             |          |
| 96  | QLFNCQSLHK                             | Non-raft | 1                     | 0       | 0       | 0       | ERBB2IP       | IPI00438286 | Isoform 1 of Protein LAP2                                     | 68      | <a href="#">18498353</a> | 14/16       | Human    |
| 97  | LSCAYSGFSSPR                           | Non-raft | 0                     | 1       | 0       | 0       | F11R          | IPI00001754 | Junctional adhesion molecule A precursor                      | 50      |                          |             |          |
| 98  | TYCFDAFPNIDK                           | Non-raft | 2                     | 0       | 0       | 0       | FAM108B1      | IPI00412592 | chromosome 9 open reading frame 77 isoform 2                  | 210     |                          |             |          |
| 99  | VLTCTDLEQGNFFLDFENAQPTSESEKEIYNQVNVVLK | Non-raft | 2                     | 0       | 1       | 0       | FAM49B        | IPI00303318 | Protein FAM49B                                                | 10      |                          |             |          |
| 100 | GLELQPQDNNGLCDPYIK                     | Non-raft | 0                     | 0       | 1       | 0       | FER1L3        | IPI00021048 | Isoform 1 of Myoferlin                                        | 1574    |                          |             |          |
| 101 | HSATTVFGANTPIVSCNFDR                   | Non-raft | 0                     | 0       | 1       | 0       | FER1L3        | IPI00021048 | Isoform 1 of Myoferlin                                        | 1131    |                          |             |          |
| 102 | IVGPSGAAPCKVEPGLGADNSVVR               | Non-raft | 0                     | 0       | 1       | 0       | FLNA          | IPI00302592 | filamin 1                                                     | 1018    |                          |             |          |
| 103 | SPYTVTVGQACNPSACR                      | Non-raft | 0                     | 1       | 0       | 0       | FLNA          | IPI00302592 | filamin 1                                                     | 478     |                          |             |          |



| No. | Sequence                   | Fraction | Biological Replicates |         |         |         | Gene Symbol | Acc.Number  | Description                                                                             | Site    | Reference                | Known Sites    | Organism |
|-----|----------------------------|----------|-----------------------|---------|---------|---------|-------------|-------------|-----------------------------------------------------------------------------------------|---------|--------------------------|----------------|----------|
|     |                            |          | 1st EXP               | 1st CON | 2nd EXP | 2nd CON |             |             |                                                                                         |         |                          |                |          |
| 104 | SPYTVTVGQACNPSACR          | Non-raft | 0                     | 1       | 0       | 0       | FLNA        | IPI00302592 | filamin 1                                                                               | 483     |                          |                |          |
| 105 | SPFVVQVGEACNPNACR          | Non-raft | 1                     | 0       | 0       | 0       | FLNB        | IPI00477536 | Filamin B                                                                               | 455     |                          |                |          |
| 106 | SSTETCYSAIPK               | Non-raft | 1                     | 0       | 0       | 0       | FLNB        | IPI00477536 | Filamin B                                                                               | 2490    |                          |                |          |
| 107 | EMLAAAQMFGLGK              | Raft     | 0                     | 0       | 1       | 0       | FLOT1       | IPI00027438 | Flotillin-1                                                                             | 85      | <a href="#">12370178</a> | 34             | Mouse    |
| 108 | MFFTCTGPNAMVVSQFGR         | Raft     | 1                     | 0       | 1       | 0       | FLOT1       | IPI00027438 | Flotillin-1                                                                             | 17      |                          |                |          |
| 109 | VFVLPCTQQIQR               | Non-raft | 1                     | 0       | 2       | 0       | FLOT1       | IPI00027438 | Flotillin-1                                                                             | 34      |                          |                |          |
|     |                            | Raft     | 3                     | 0       | 1       | 0       | FLOT1       | IPI00027438 | Flotillin-1                                                                             | 34      |                          |                |          |
| 110 | HVGSNLCILDSR               | Non-raft | 1                     | 0       | 0       | 0       | GALNT2      | IPI00004669 | Polypeptide N-acetylgalactosaminyltransferase 2                                         | 496     |                          |                |          |
| 111 | IISNASCTTNCLAPLAK          | Non-raft | 5                     | 1       | 4       | 1       | GAPDH       | IPI00219018 | Glyceraldehyde-3-phosphate dehydrogenase                                                | 152     | <a href="#">16128592</a> | 244            | Rabbit   |
|     |                            | Raft     | 0                     | 0       | 1       | 0       | GAPDH       | IPI00219018 | Glyceraldehyde-3-phosphate dehydrogenase                                                | 156     |                          |                |          |
| 112 | IISNASCTTNCLAPLAK          | Non-raft | 4                     | 4       | 3       | 2       | GAPDH       | IPI00219018 | Glyceraldehyde-3-phosphate dehydrogenase                                                | 156     |                          |                |          |
|     |                            | Raft     | 1                     | 1       | 1       | 0       | GAPDH       | IPI00219018 | Glyceraldehyde-3-phosphate dehydrogenase                                                | 160     |                          |                |          |
| 113 | IISNASCTTNCLAPLAK          | Non-raft | 3                     | 4       | 3       | 2       | GAPDH       | IPI00219018 | Glyceraldehyde-3-phosphate dehydrogenase                                                | 152/156 |                          |                |          |
|     |                            | Raft     | 1                     | 1       | 0       | 0       | GAPDH       | IPI00219018 | Glyceraldehyde-3-phosphate dehydrogenase                                                | 156/160 |                          |                |          |
| 114 | VPTANVSVVDLTCR             | Non-raft | 3                     | 1       | 3       | 3       | GAPDH       | IPI00219018 | Glyceraldehyde-3-phosphate dehydrogenase                                                | 247     |                          |                |          |
|     |                            | Raft     | 1                     | 0       | 0       | 0       | GAPDH       | IPI00219018 | Glyceraldehyde-3-phosphate dehydrogenase                                                | 247     |                          |                |          |
| 115 | FCENTQAGEGR                | Non-raft | 1                     | 0       | 0       | 0       | GLG1        | IPI00414717 | golgi apparatus protein 1                                                               | 324     |                          |                |          |
| 116 | LSSDCEDQIR                 | Non-raft | 1                     | 0       | 0       | 0       | GLG1        | IPI00414717 | golgi apparatus protein 1                                                               | 542     |                          |                |          |
| 117 | MACKEDVLK                  | Non-raft | 1                     | 0       | 0       | 0       | GLG1        | IPI00414717 | golgi apparatus protein 1                                                               | 515     |                          |                |          |
| 118 | FSPDLWGVSVCTVDGQR          | Non-raft | 0                     | 1       | 0       | 0       | GLS         | IPI00215687 | Isoform GAC of Glutaminase kidney isoform, mitochondrial precursor                      | 266     |                          |                |          |
|     |                            | Non-raft | 0                     | 1       | 0       | 0       | GLS         | IPI00289159 | Isoform KGA of Glutaminase kidney isoform, mitochondrial precursor                      | 266     |                          |                |          |
| 119 | MFVDLNPDSKIIYSHFTCATDTENIR | Non-raft | 1                     | 0       | 0       | 0       | GNA11       | IPI00305551 | Guanine nucleotide-binding protein subunit alpha-11                                     | 330     | <a href="#">9175863</a>  | 9/10           | Human    |
|     |                            | Non-raft | 1                     | 0       | 0       | 0       | GNAQ        | IPI00288947 | Guanine nucleotide binding protein                                                      | 330     | <a href="#">8227063</a>  | 9/10 (3/4)     | Human    |
| 120 | TLESMMACCLSDSEVK           | Non-raft | 2                     | 0       | 1       | 0       | GNA11       | IPI00305551 | Guanine nucleotide-binding protein subunit alpha-11                                     | 9/10    |                          |                |          |
| 121 | EIYTHFTCATDTK              | Raft     | 1                     | 0       | 0       | 0       | GNAI1       | IPI00337415 | Guanine nucleotide-binding protein G(i), alpha-1 subunit                                | 325     | <a href="#">8484716</a>  | 3 (similarity) | Human    |
|     |                            | Raft     | 1                     | 0       | 0       | 0       | GNAI2       | IPI00748145 | guanine nucleotide binding protein (G protein), alpha inhibiting activity polypeptide 2 | 327     | <a href="#">8484716</a>  | 3 (similarity) | Human    |
|     |                            | Raft     | 1                     | 0       | 0       | 0       | GNAI3       | IPI00220578 | Guanine nucleotide-binding protein G(k) subunit alpha                                   | 325     |                          |                |          |
| 122 | LFDSICNNK                  | Non-raft | 1                     | 0       | 1       | 0       | GNAI1       | IPI00337415 | Guanine nucleotide-binding protein G(i), alpha-1 subunit                                | 254     |                          |                |          |
|     |                            | Raft     | 1                     | 0       | 0       | 0       | GNAI1       | IPI00337415 | Guanine nucleotide-binding protein G(i), alpha-1 subunit                                | 254     |                          |                |          |
|     |                            | Non-raft | 1                     | 0       | 1       | 0       | GNAI2       | IPI00748145 | guanine nucleotide binding protein (G protein), alpha inhibiting activity polypeptide 2 | 255     |                          |                |          |
|     |                            | Raft     | 1                     | 0       | 0       | 0       | GNAI2       | IPI00748145 | guanine nucleotide binding protein (G protein), alpha inhibiting activity polypeptide 2 | 255     |                          |                |          |
|     |                            | Non-raft | 1                     | 0       | 1       | 0       | GNAI3       | IPI00220578 | Guanine nucleotide-binding protein G(k) subunit alpha                                   | 254     |                          |                |          |
|     |                            | Raft     | 1                     | 0       | 0       | 0       | GNAI3       | IPI00220578 | Guanine nucleotide-binding protein G(k) subunit alpha                                   | 254     |                          |                |          |
|     |                            | Non-raft | 1                     | 0       | 0       | 0       | GNAO1       | IPI00220281 | Guanine nucleotide-binding protein G(o) subunit alpha 1                                 | 255     | <a href="#">8484716</a>  | 3 (similarity) | Human    |
|     |                            | Raft     | 1                     | 0       | 0       | 0       | GNAO1       | IPI00220281 | Guanine nucleotide-binding protein G(o) subunit alpha 1                                 | 255     |                          |                |          |
| 123 | IIHEDGYSEEECR              | Non-raft | 2                     | 0       | 1       | 0       | GNAI2       | IPI00748145 | guanine nucleotide binding protein (G protein), alpha inhibiting activity polypeptide 2 | 66      |                          |                |          |
|     |                            | Raft     | 1                     | 0       | 0       | 0       | GNAI2       | IPI00748145 | guanine nucleotide binding protein (G protein), alpha inhibiting activity polypeptide 2 | 66      |                          |                |          |
| 124 | LWADHGVQACFGR              | Non-raft | 1                     | 0       | 0       | 0       | GNAI2       | IPI00748145 | guanine nucleotide binding protein (G protein), alpha inhibiting activity polypeptide 2 | 140     |                          |                |          |

| No. | Sequence                       | Fraction | Biological Replicates |         |         |         | Gene Symbol | Acc.Number  | Description                                                                             | Site | Reference                | Known Sites    | Organism |
|-----|--------------------------------|----------|-----------------------|---------|---------|---------|-------------|-------------|-----------------------------------------------------------------------------------------|------|--------------------------|----------------|----------|
|     |                                |          | 1st EXP               | 1st CON | 2nd EXP | 2nd CON |             |             |                                                                                         |      |                          |                |          |
| 125 | QLFALSCTAEEQVLPDDLSGVIR        | Non-raft | 1                     | 0       | 1       | 0       | GNAI2       | IPI00748145 | guanine nucleotide binding protein (G protein), alpha inhibiting activity polypeptide 2 | 112  |                          |                |          |
| 126 | DGGVQACFSR                     | Non-raft | 0                     | 0       | 1       | 0       | GNAI3       | IPI00220578 | Guanine nucleotide-binding protein G(k) subunit alpha                                   | 139  | <a href="#">8484716</a>  | 3 (similarity) | Human    |
|     |                                | Raft     | 1                     | 0       | 0       | 0       | GNAI3       | IPI00220578 | Guanine nucleotide-binding protein G(k) subunit alpha                                   | 139  |                          |                |          |
| 127 | IIHEDGYSEDECKQYK               | Non-raft | 2                     | 0       | 1       | 0       | GNAI3       | IPI00220578 | Guanine nucleotide-binding protein G(k) subunit alpha                                   | 66   |                          |                |          |
| 128 | SPLTICYPEYTGSTYEEAAAYIQCFEDLNR | Non-raft | 1                     | 0       | 0       | 0       | GNAI3       | IPI00220578 | Guanine nucleotide-binding protein G(k) subunit alpha                                   | 305  |                          |                |          |
| 129 | SLWNDPGIQECYDR                 | Non-raft | 1                     | 0       | 1       | 0       | GNAQ        | IPI00288947 | Guanine nucleotide binding protein                                                      | 144  |                          |                |          |
| 130 | TLESIMACCLSEEAK                | Non-raft | 0                     | 0       | 1       | 0       | GNAQ        | IPI00288947 | Guanine nucleotide binding protein                                                      | 9/10 |                          |                |          |
| 131 | HYCYPHFTCAVDTENIRR             | Raft     | 1                     | 0       | 0       | 0       | GNAS        | IPI00219835 | Isoform Gnas-2 of Guanine nucleotide-binding protein G(s) subunit alpha isoforms short  | 345  | <a href="#">8484716</a>  | 3 (similarity) | Human    |
|     |                                | Raft     | 1                     | 0       | 0       | 0       | GNAS        | IPI00514055 | Isoform Gnas-1 of Guanine nucleotide-binding protein G(s) subunit alpha isoforms short  | 359  |                          |                |          |
|     |                                | Raft     | 1                     | 0       | 0       | 0       | GNAS        | IPI00644936 | Guanine nucleotide-binding protein G-s-alpha-3                                          | 344  |                          |                |          |
| 132 | SNEYQLIDCAQYFLDKIDVIK          | Non-raft | 2                     | 0       | 0       | 0       | GNAS        | IPI00219835 | Isoform Gnas-2 of Guanine nucleotide-binding protein G(s) subunit alpha isoforms short  | 160  |                          |                |          |
|     |                                | Raft     | 0                     | 0       | 1       | 0       | GNAS        | IPI00219835 | Isoform Gnas-2 of Guanine nucleotide-binding protein G(s) subunit alpha isoforms short  | 160  |                          |                |          |
|     |                                | Non-raft | 2                     | 0       | 0       | 0       | GNAS        | IPI00514055 | Isoform Gnas-1 of Guanine nucleotide-binding protein G(s) subunit alpha isoforms short  | 174  |                          |                |          |
|     |                                | Raft     | 0                     | 0       | 1       | 0       | GNAS        | IPI00514055 | Isoform Gnas-1 of Guanine nucleotide-binding protein G(s) subunit alpha isoforms short  | 174  |                          |                |          |
|     |                                | Non-raft | 2                     | 0       | 0       | 0       | GNAS        | IPI00514055 | Isoform Gnas-1 of Guanine nucleotide-binding protein G(s) subunit alpha isoforms short  | 174  |                          |                |          |
|     |                                | Raft     | 0                     | 0       | 1       | 0       | GNAS        | IPI00644936 | Guanine nucleotide-binding protein G-s-alpha-3                                          | 159  |                          |                |          |
| 133 | ACADATLSQITNNIDPVGR            | Non-raft | 1                     | 1       | 0       | 0       | GNB1        | IPI00026268 | Guanine nucleotide-binding protein G(I)/G(S)/G(T) subunit beta 1                        | 25   |                          |                |          |
| 134 | LFVSGACDASAK                   | Non-raft | 1                     | 1       | 0       | 0       | GNB1        | IPI00026268 | Guanine nucleotide-binding protein G(I)/G(S)/G(T) subunit beta 1                        | 204  |                          |                |          |
| 135 | FSPNSSNPIIVSCGWDK              | Non-raft | 0                     | 0       | 1       | 0       | GNB2L1      | IPI00641950 | Lung cancer oncogene 7                                                                  | 198  |                          |                |          |
| 136 |                                | Raft     | 1                     | 1       | 2       | 0       | GNB2L1      | IPI00641950 | Lung cancer oncogene 7                                                                  | 198  |                          |                |          |
| 137 | LWNTLGVCK                      | Raft     | 1                     | 1       | 0       | 1       | GNB2L1      | IPI00641950 | Lung cancer oncogene 7                                                                  | 168  |                          |                |          |
| 138 | TNHIGHTGYLNTVTVSPDGLSCASGGK    | Raft     | 2                     | 1       | 0       | 0       | GNB2L1      | IPI00641950 | Lung cancer oncogene 7                                                                  | 237  |                          |                |          |
| 139 | VWNLANCK                       | Raft     | 1                     | 0       | 0       | 0       | GNB2L1      | IPI00641950 | Lung cancer oncogene 7                                                                  | 212  |                          |                |          |
| 140 | YWLC AATGPSIK                  | Non-raft | 0                     | 1       | 1       | 1       | GNB2L1      | IPI00641950 | Lung cancer oncogene 7                                                                  | 279  |                          |                |          |
|     |                                | Raft     | 0                     | 1       | 2       | 0       | GNB2L1      | IPI00641950 | Lung cancer oncogene 7                                                                  | 279  |                          |                |          |
| 141 | NPMDYPVEDAFCKPQLVK             | Raft     | 3                     | 0       | 2       | 0       | GPRC5A      | IPI00022624 | Retinoic acid-induced protein 3                                                         | 284  |                          |                |          |
| 142 | AYLEGT C VEWLR                 | Non-raft | 1                     | 1       | 4       | 0       | HLA-A       | IPI00743503 | HLA class I histocompatibility antigen, A-34 alpha chain precursor                      | 188  |                          |                |          |
|     |                                | Raft     | 1                     | 0       | 0       | 0       | HLA-A       | IPI00743503 | HLA class I histocompatibility antigen, A-34 alpha chain precursor                      | 188  |                          |                |          |
|     |                                | Non-raft | 1                     | 1       | 4       | 0       | HLA-C       | IPI00473131 | HLA class I histocompatibility antigen, Cw-6 alpha chain precursor                      | 188  | <a href="#">17785801</a> | -              | Human    |
|     |                                | Raft     | 1                     | 0       | 0       | 0       | HLA-C       | IPI00473131 | HLA class I histocompatibility antigen, Cw-6 alpha chain precursor                      | 188  |                          |                |          |
| 143 | AYLEGL C VEWLR                 | Non-raft | 1                     | 1       | 4       | 0       | HLA-B       | IPI00471955 | HLA class I histocompatibility antigen, B-50 alpha chain precursor                      | 188  | <a href="#">17785801</a> | -              | Human    |
|     |                                | Raft     | 1                     | 0       | 0       | 0       | HLA-B       | IPI00471955 | HLA class I histocompatibility antigen, B-50 alpha chain precursor                      | 188  |                          |                |          |

| No. | Sequence                 | Fraction | Biological Replicates |         |         |         | Gene Symbol | Acc.Number  | Description                                                        | Site    | Reference                | Known Sites | Organism |
|-----|--------------------------|----------|-----------------------|---------|---------|---------|-------------|-------------|--------------------------------------------------------------------|---------|--------------------------|-------------|----------|
|     |                          |          | 1st EXP               | 1st CON | 2nd EXP | 2nd CON |             |             |                                                                    |         |                          |             |          |
| 144 | YTCHVQHEGLPKPLTLR        | Non-raft | 1                     | 0       | 0       | 0       | HLA-A       | IPI00743503 | HLA class I histocompatibility antigen, A-34 alpha chain precursor | 283     |                          |             |          |
|     |                          | Non-raft | 1                     | 0       | 0       | 0       | HLA-B       | IPI00471955 | HLA class I histocompatibility antigen, B-50 alpha chain precursor | 283     |                          |             |          |
| 145 | MYGCDLGPDGR              | Non-raft | 2                     | 0       | 3       | 0       | HLA-B       | IPI00471955 | HLA class I histocompatibility antigen, B-50 alpha chain precursor | 125     |                          |             |          |
|     |                          | Non-raft | 2                     | 0       | 3       | 0       | HLA-C       | IPI00473131 | HLA class I histocompatibility antigen, Cw-6 alpha chain precursor | 125     |                          |             |          |
| 146 | GGSCSQAASSNSAQSDESLIACKA | Non-raft | 2                     | 0       | 0       | 0       | HLA-C       | IPI00473131 | HLA class I histocompatibility antigen, Cw-6 alpha chain precursor | 345     |                          |             |          |
| 147 | VFNVFCLYGNVEK            | Raft     | 1                     | 1       | 0       | 0       | HNRNPL      | IPI00027834 | heterogeneous nuclear ribonucleoprotein L isoform a                | 404     |                          |             |          |
| 148 | TGEGFLCVFAINNTK          | Non-raft | 0                     | 0       | 1       | 0       | HRAS        | IPI00000006 | GTPase HRas precursor                                              | 80      | <a href="#">10504264</a> | 181/184     | Human    |
|     |                          | Non-raft | 0                     | 0       | 1       | 0       | KRAS        | IPI00423568 | Isoform 2A of GTPase KRas                                          | 80      | <a href="#">3023817</a>  | 180         | Human    |
| 149 | AAVEEGIVLGGGCALLR        | Non-raft | 0                     | 1       | 0       | 1       | HSPD1       | IPI00472102 | Heat shock protein 60                                              | 442     |                          |             |          |
| 150 | DLEGTYLCR                | Non-raft | 0                     | 1       | 0       | 1       | ICAM1       | IPI00008494 | Intercellular adhesion molecule 1 precursor                        | 457     |                          |             |          |
| 151 | YSDNWEAITGTGDPEHYLINVCK  | Non-raft | 0                     | 0       | 1       | 0       | IGF2R       | IPI00289819 | Cation-independent mannose-6-phosphate receptor precursor          | 586     |                          |             |          |
| 152 | SETVLTATGR               | Non-raft | 2                     | 0       | 0       | 0       | ITGA3       | IPI00215995 | Isoform Alpha-3A of Integrin alpha-3 precursor                     | 904     |                          |             |          |
| 153 | TGAVYLCPLTAHK            | Non-raft | 1                     | 1       | 0       | 0       | ITGA3       | IPI00215995 | Isoform Alpha-3A of Integrin alpha-3 precursor                     | 94      |                          |             |          |
| 154 | CDDLEALK                 | Non-raft | 1                     | 0       | 0       | 0       | ITGB1       | IPI00645194 | integrin beta 1 isoform 1A precursor                               | 64      |                          |             |          |
| 155 | FCECDNFNCDR              | Non-raft | 2                     | 1       | 1       | 0       | ITGB1       | IPI00645194 | integrin beta 1 isoform 1A precursor                               | 555     |                          |             |          |
| 156 | FCECDNFNCDR              | Non-raft | 0                     | 0       | 1       | 1       | ITGB1       | IPI00645194 | integrin beta 1 isoform 1A precursor                               | 560     |                          |             |          |
| 157 | FCECDNFNCDR              | Non-raft | 0                     | 1       | 0       | 0       | ITGB1       | IPI00645194 | integrin beta 1 isoform 1A precursor                               | 553/555 |                          |             |          |
| 158 | FCECDNFNCDR              | Non-raft | 0                     | 1       | 0       | 0       | ITGB1       | IPI00645194 | integrin beta 1 isoform 1A precursor                               | 553     |                          |             |          |
| 159 | GCPPDDIENPR              | Non-raft | 1                     | 4       | 0       | 0       | ITGB1       | IPI00645194 | integrin beta 1 isoform 1A precursor                               | 75      |                          |             |          |
| 160 | LPQPVPQDPVSHCK           | Non-raft | 0                     | 2       | 1       | 1       | ITGB1       | IPI00645194 | integrin beta 1 isoform 1A precursor                               | 691     |                          |             |          |
| 161 | SNGLICGGNGVCK            | Non-raft | 1                     | 1       | 0       | 1       | ITGB1       | IPI00645194 | integrin beta 1 isoform 1A precursor                               | 568     |                          |             |          |
| 162 | SNGLICGGNGVCK            | Non-raft | 0                     | 1       | 1       | 1       | ITGB1       | IPI00645194 | integrin beta 1 isoform 1A precursor                               | 574     |                          |             |          |
| 163 | LVQNCLWTLR               | Non-raft | 0                     | 0       | 0       | 1       | JUP         | IPI00554711 | Junction plakoglobin                                               | 372     |                          |             |          |
|     |                          | Raft     | 0                     | 0       | 0       | 1       | JUP         | IPI00554711 | Junction plakoglobin                                               | 372     |                          |             |          |
| 164 | NLALCPANHAPLQEAVIPR      | Raft     | 1                     | 0       | 0       | 0       | JUP         | IPI00554711 | Junction plakoglobin                                               | 511     |                          |             |          |
| 165 | VLSVCPSNKPAIVEAGGMQALGK  | Raft     | 0                     | 1       | 0       | 0       | JUP         | IPI00554711 | Junction plakoglobin                                               | 341     |                          |             |          |
| 166 | VIGSGCNLDSAR             | Non-raft | 1                     | 1       | 0       | 1       | LDHA        | IPI00217966 | lactate dehydrogenase A                                            | 163     |                          |             |          |
|     |                          | Non-raft | 1                     | 1       | 0       | 1       | LDHB        | IPI00219217 | L-lactate dehydrogenase B chain                                    | 164     |                          |             |          |
| 167 | ACGLVASNLNLKPGECLR       | Non-raft | 2                     | 0       | 2       | 1       | LGALS1      | IPI00219219 | Galectin-1                                                         | 3/17    |                          |             |          |
|     |                          | Raft     | 2                     | 2       | 2       | 0       | LGALS1      | IPI00219219 | Galectin-1                                                         | 3/17    |                          |             |          |
| 168 | ACGLVASNLNLKPGECLR       | Non-raft | 1                     | 0       | 1       | 1       | LGALS1      | IPI00219219 | Galectin-1                                                         | 3       |                          |             |          |
|     |                          | Raft     | 1                     | 1       | 2       | 0       | LGALS1      | IPI00219219 | Galectin-1                                                         | 3       |                          |             |          |
| 169 | ACGLVASNLNLKPGECLR       | Non-raft | 2                     | 0       | 2       | 0       | LGALS1      | IPI00219219 | Galectin-1                                                         | 17      |                          |             |          |
|     |                          | Raft     | 2                     | 2       | 2       | 0       | LGALS1      | IPI00219219 | Galectin-1                                                         | 17      |                          |             |          |
| 170 | DSNNLCLHFNPR             | Raft     | 0                     | 1       | 0       | 0       | LGALS1      | IPI00219219 | Galectin-1                                                         | 43      |                          |             |          |
| 171 | FNAHG DANTIVCNSK         | Non-raft | 1                     | 1       | 1       | 0       | LGALS1      | IPI00219219 | Galectin-1                                                         | 61      |                          |             |          |
|     |                          | Raft     | 2                     | 1       | 0       | 0       | LGALS1      | IPI00219219 | Galectin-1                                                         | 61      |                          |             |          |
| 172 | WTELAGCTADFR             | Non-raft | 1                     | 0       | 0       | 0       | LMAN2       | IPI00009950 | Vesicular integral-membrane protein VIP36 precursor                | 202     |                          |             |          |
| 173 | AQNTWGCNLSLR             | Raft     | 1                     | 1       | 0       | 0       | LMNA        | IPI00021405 | Isoform A of Lamin-A/C                                             | 522     |                          |             |          |
| 174 | ISDYVGTGER               | Non-raft | 1                     | 0       | 0       | 0       | LOC153364   | IPI00293336 | similar to metallo-beta-lactamase superfamily protein              | 212     |                          |             |          |
| 175 | LVEALCAEHQINLIK          | Raft     | 1                     | 0       | 0       | 0       | LOC440055   | IPI00456898 | PREDICTED: similar to ribosomal protein S12                        | 70      |                          |             |          |

| No. | Sequence                                    | Fraction | Biological Replicates |         |         |         | Gene Symbol | Acc.Number  | Description                                                               | Site        | Reference                | Known Sites            | Organism |
|-----|---------------------------------------------|----------|-----------------------|---------|---------|---------|-------------|-------------|---------------------------------------------------------------------------|-------------|--------------------------|------------------------|----------|
|     |                                             |          | 1st EXP               | 1st CON | 2nd EXP | 2nd CON |             |             |                                                                           |             |                          |                        |          |
| 176 | MFHC <b>C</b> IPLWR                         | Non-raft | 1                     | 0       | 1       | 0       | LRRC1       | IPI00427739 | Isoform 1 of Leucine-rich repeat-containing protein 1                     | 4           |                          |                        |          |
| 177 | <b>C</b> CCPEALYAAGK                        | Non-raft | 1                     | 0       | 0       | 0       | LSR         | IPI00409640 | Isoform 1 of Lipolysis-stimulated lipoprotein receptor                    | 302/303/304 |                          |                        |          |
|     |                                             | Raft     | 1                     | 0       | 0       | 0       | LSR         | IPI00409640 | Isoform 1 of Lipolysis-stimulated lipoprotein receptor                    | 302/303/304 |                          |                        |          |
| 178 | GMEQFPHLAFWQDLGNLVADGCDFV <b>C</b> R        | Non-raft | 1                     | 0       | 0       | 0       | M6PR        | IPI00025049 | Cation-dependent mannose-6-phosphate receptor precursor                   | 240/244     |                          |                        |          |
| 179 | RAVVMIS <b>C</b> NR                         | Non-raft | 0                     | 0       | 1       | 0       | M6PR        | IPI00025049 | Cation-dependent mannose-6-phosphate receptor precursor                   | 145         | <a href="#">8647889</a>  | 34                     | Bovine   |
| 180 | <b>G</b> CDVVVIPAGVPR                       | Non-raft | 0                     | 0       | 0       | 1       | MDH2        | IPI00291006 | Malate dehydrogenase, mitochondrial precursor                             | 93          |                          |                        |          |
| 181 | GYLGPEQLPD <b>C</b> LK                      | Non-raft | 1                     | 0       | 0       | 0       | MDH2        | IPI00291006 | Malate dehydrogenase, mitochondrial precursor                             | 89          |                          |                        |          |
| 182 | TIIP <b>L</b> IS <b>Q</b> CTPK              | Non-raft | 1                     | 0       | 0       | 0       | MDH2        | IPI00291006 | Malate dehydrogenase, mitochondrial precursor                             | 212         |                          |                        |          |
| 183 | RLLY <b>C</b> QR                            | Non-raft | 1                     | 0       | 0       | 0       | MMP14       | IPI00218398 | Matrix metalloproteinase-14 precursor                                     | 574         | <a href="#">15946988</a> | 574                    | Human    |
| 184 | DWDNSGPF <b>C</b> GTISSK                    | Non-raft | 1                     | 0       | 1       | 0       | MPP6        | IPI00303280 | MAGUK p55 subfamily member 6                                              | 298         |                          |                        |          |
| 185 | <b>T</b> CILDVNPQALK                        | Non-raft | 1                     | 0       | 0       | 0       | MPP6        | IPI00303280 | MAGUK p55 subfamily member 6                                              | 432         |                          |                        |          |
| 186 | ALALAALAAVEPAC <b>G</b> S <b>R</b>          | Non-raft | 1                     | 0       | 0       | 0       | NDFIP1      | IPI00012235 | Isoform 1 of NEDD4 family-interacting protein 1                           | 15          |                          |                        |          |
| 187 | GDF <b>C</b> IQVGR                          | Non-raft | 0                     | 0       | 1       | 0       | NME1        | IPI00012048 | Nucleoside diphosphate kinase A                                           | 109         |                          |                        |          |
| 188 | GAEDGTSVQASES <b>C</b> LFR                  | Non-raft | 0                     | 0       | 1       | 0       | NPC1        | IPI00005107 | Niemann-Pick C1 protein precursor                                         | 816         |                          |                        |          |
| 189 | IGFAPSSWIDDYFDWVKPQSS <b>C</b> CR           | Non-raft | 0                     | 0       | 1       | 0       | NPC1        | IPI00005107 | Niemann-Pick C1 protein precursor                                         | 956         |                          |                        |          |
| 190 | NRLDIF <b>C</b> CVR                         | Non-raft | 1                     | 0       | 0       | 0       | NPC1        | IPI00005107 | Niemann-Pick C1 protein precursor                                         | 799/800     |                          |                        |          |
| 191 | TGEGFL <b>C</b> VFAINNSK                    | Non-raft | 1                     | 0       | 1       | 0       | NRAS        | IPI00000005 | GTPase NRas precursor                                                     | 80          | <a href="#">2661017</a>  | 181                    | Human    |
| 192 | AADYNQALGT <b>C</b> R                       | Non-raft | 1                     | 0       | 0       | 0       | NRSN2       | IPI00017231 | Protein C20orf98                                                          | 115         |                          |                        |          |
| 193 | MGVVE <b>C</b> AK                           | Raft     | 1                     | 0       | 0       | 0       | PA2G4       | IPI00299000 | Proliferation-associated protein 2G4                                      | 296         |                          |                        |          |
| 194 | LVPAT <b>Q</b> CGLSIGK                      | Non-raft | 1                     | 1       | 0       | 0       | PCBP1       | IPI00016610 | Poly(rC)-binding protein 1                                                | 119         |                          |                        |          |
| 195 | VDC <b>T</b> ANTNT <b>C</b> NK              | Non-raft | 0                     | 1       | 0       | 0       | PDIA3       | IPI00025252 | Protein disulfide-isomerase A3 precursor                                  | 92          |                          |                        |          |
| 196 | CGLA <b>C</b> ER                            | Raft     | 2                     | 0       | 0       | 0       | PERP        | IPI00293189 | Isoform 1 of p53 apoptosis effector related to PMP-22                     | 8           |                          |                        |          |
| 197 | YADLTEDQLP <b>S</b> CESLKDTIAR              | Non-raft | 1                     | 0       | 1       | 0       | PGAM1       | IPI00549725 | Phosphoglycerate mutase 1                                                 | 153         |                          |                        |          |
| 198 | AEGSDVANAVLDGAD <b>C</b> IMLSGETAKGDYPLEAVR | Non-raft | 2                     | 0       | 0       | 0       | PKM2        | IPI00479186 | pyruvate kinase 3 isoform 1                                               | 358         |                          |                        |          |
| 199 | AGKPVI <b>C</b> ATQMLESNIK                  | Non-raft | 0                     | 1       | 0       | 0       | PKM2        | IPI00479186 | pyruvate kinase 3 isoform 1                                               | 326         |                          |                        |          |
| 200 | GIFPVL <b>C</b> KDPVQEAWAEDVDLR             | Non-raft | 1                     | 0       | 1       | 0       | PKM2        | IPI00479186 | pyruvate kinase 3 isoform 1                                               | 474         |                          |                        |          |
| 201 | NTGI <b>C</b> TIGPASR                       | Non-raft | 2                     | 1       | 2       | 2       | PKM2        | IPI00479186 | pyruvate kinase 3 isoform 1                                               | 49          |                          |                        |          |
| 202 | LSAPG <b>C</b> WAA <b>C</b> TNFSR           | Non-raft | 1                     | 0       | 1       | 0       | PLP2        | IPI00030362 | Proteolipid protein 2                                                     | 12/16       |                          |                        |          |
| 203 | VYFAAEDTD <b>C</b> CTR                      | Non-raft | 2                     | 0       | 1       | 0       | PLSCR1      | IPI00005181 | Phospholipid scramblase 1                                                 | 148/149     | <a href="#">12564925</a> | 184-189                | Human    |
|     |                                             | Raft     | 1                     | 0       | 0       | 0       | PLSCR1      | IPI00005181 | Phospholipid scramblase 1                                                 | 148/149     |                          |                        |          |
| 204 | SGAGQPLGQAAEESN <b>C</b> CAR                | Non-raft | 2                     | 0       | 0       | 0       | PLSCR3      | IPI00216127 | Phospholipid scramblase 3                                                 | 125/126     |                          | 211/214/216 (probable) | Human    |
| 205 | SGAGQPLGQAAEESN <b>C</b> CAR                | Non-raft | 1                     | 0       | 0       | 0       | PLSCR3      | IPI00216127 | Phospholipid scramblase 3                                                 | 126         |                          |                        |          |
| 206 | HTGPGILSMANAGPNTNGSQFFI <b>C</b> TAK        | Non-raft | 1                     | 0       | 0       | 0       | PPIA        | IPI00419585 | Peptidyl-prolyl cis-trans isomerase A                                     | 115         |                          |                        |          |
| 207 | IIPGF <b>M</b> CQGGDFTR                     | Non-raft | 1                     | 0       | 1       | 0       | PPIA        | IPI00419585 | Peptidyl-prolyl cis-trans isomerase A                                     | 62          |                          |                        |          |
|     |                                             | Raft     | 0                     | 0       | 1       | 0       | PPIA        | IPI00419585 | Peptidyl-prolyl cis-trans isomerase A                                     | 62          |                          |                        |          |
| 208 | KITIAD <b>C</b> GQLE                        | Raft     | 0                     | 1       | 0       | 0       | PPIA        | IPI00419585 | Peptidyl-prolyl cis-trans isomerase A                                     | 161         |                          |                        |          |
| 209 | LVQAFQFTDKHGEV <b>C</b> PAGWKPGSDTIKPDVQK   | Raft     | 1                     | 0       | 0       | 0       | PRDX1       | IPI00000874 | Peroxiredoxin-1                                                           | 173         |                          |                        |          |
| 210 | GKDC <b>C</b> AVIVTQK                       | Non-raft | 1                     | 0       | 0       | 0       | PSMA6       | IPI00029623 | Proteasome subunit alpha type 6                                           | 47          |                          |                        |          |
| 211 | <b>A</b> CLDYPVTSVLPASL <b>C</b> K          | Non-raft | 1                     | 0       | 1       | 0       | PTTG1IP     | IPI00023974 | Pituitary tumor-transforming gene 1 protein-interacting protein precursor | 66/81       |                          |                        |          |
|     |                                             | Raft     | 1                     | 0       | 0       | 0       | PTTG1IP     | IPI00023974 | Pituitary tumor-transforming gene 1 protein-interacting protein precursor | 66          |                          |                        |          |
| 212 | NV <b>S</b> CLW <b>C</b> NTNK               | Non-raft | 1                     | 0       | 0       | 0       | PTTG1IP     | IPI00023974 | Pituitary tumor-transforming gene 1 protein-interacting protein precursor | 57/60       |                          |                        |          |

| No. | Sequence                        | Fraction | Biological Replicates |         |         |         | Gene Symbol | Acc.Number  | Description                                                                        | Site    | Reference                | Known Sites | Organism |
|-----|---------------------------------|----------|-----------------------|---------|---------|---------|-------------|-------------|------------------------------------------------------------------------------------|---------|--------------------------|-------------|----------|
|     |                                 |          | 1st EXP               | 1st CON | 2nd EXP | 2nd CON |             |             |                                                                                    |         |                          |             |          |
| 213 | VTFSQDPTTVALCISK                | Non-raft | 1                     | 0       | 0       | 0       | PVRL2       | IPI00022661 | Isoform Delta of Poliovirus receptor-related protein 2 precursor                   | 183     |                          |             |          |
| 214 | LLLGNKC DMEAK                   | Non-raft | 1                     | 0       | 0       | 0       | RAB13       | IPI00016373 | Ras-related protein Rab-13                                                         | 123     |                          |             |          |
| 215 | YLECSALTQR                      | Non-raft | 1                     | 0       | 1       | 0       | RAC1        | IPI00010271 | Isoform A of Ras-related C3 botulinum toxin substrate 1 precursor                  | 157     |                          |             |          |
|     |                                 | Raft     | 1                     | 1       | 0       | 0       | RAC1        | IPI00010271 | Isoform A of Ras-related C3 botulinum toxin substrate 1 precursor                  | 157     |                          |             |          |
| 216 | QWNNCAFLESSAK                   | Non-raft | 1                     | 1       | 1       | 0       | RAP1B       | IPI00015148 | Ras-related protein Rap-1b precursor                                               | 141     |                          |             |          |
| 217 | ALAEWGC PFMETSAK                | Non-raft | 0                     | 0       | 1       | 0       | RAP2A       | IPI00019346 | Ras-related protein Rap-2a                                                         | 140     |                          |             |          |
|     |                                 | Raft     | 1                     | 0       | 0       | 0       | RAP2B       | IPI00018364 | Ras-related protein Rap-2b precursor                                               | 140     | <a href="#">18582561</a> | 176/177     | Human    |
| 218 | ALAEWGC PFMETSAK                | Non-raft | 1                     | 0       | 2       | 0       | RAP2C       | IPI00009607 | Ras-related protein Rap-2c precursor                                               | 140     |                          |             |          |
| 219 | LYGSLPCLVLLER                   | Non-raft | 0                     | 0       | 1       | 0       | RCE1        | IPI00031755 | CAAX prenyl protease 2                                                             | 85      |                          |             |          |
| 220 | NCMTDLLAKLEAK                   | Non-raft | 1                     | 0       | 1       | 0       | REEP5       | IPI00024670 | Receptor expression-enhancing protein 5                                            | 18      |                          |             |          |
| 221 | CTTEAEQDIEEEKVEK                | Raft     | 1                     | 0       | 0       | 0       | RELL1       | IPI00216890 | Similar to expressed sequence AA536743                                             | 88      |                          |             |          |
| 222 | IGAFGYMECSAK                    | Non-raft | 0                     | 0       | 2       | 0       | RHOA        | IPI00027500 | Transforming protein RhoA precursor                                                | 159     |                          |             |          |
| 223 | HFCPNVPILVANKK                  | Non-raft | 1                     | 0       | 1       | 0       | RHOB        | IPI00000041 | Rho-related GTP-binding protein RhoB precursor                                     | 107     | <a href="#">1400319</a>  | 189/192     | Human    |
| 224 | VLPCHAHAYHSR                    | Non-raft | 1                     | 0       | 0       | 0       | RNF167      | IPI00023511 | RING finger protein 167 precursor                                                  | 248     |                          |             |          |
| 225 | CTGGVEVGATSALAPK                | Non-raft | 0                     | 0       | 1       | 0       | RPL12       | IPI00024933 | 60S ribosomal protein L12                                                          | 17      |                          |             |          |
|     |                                 | Raft     | 1                     | 0       | 0       | 0       | RPL12       | IPI00024933 | 60S ribosomal protein L12                                                          | 12      |                          |             |          |
| 226 | LVILANNC PALR                   | Non-raft | 0                     | 0       | 1       | 0       | RPL30       | IPI00219156 | 60S ribosomal protein L30                                                          | 52      |                          |             |          |
| 227 | VCTLAIDPGDSDIIR                 | Non-raft | 0                     | 0       | 1       | 0       | RPL30       | IPI00219156 | 60S ribosomal protein L30                                                          | 92      |                          |             |          |
| 228 | VGLTNYAAAYCTGLLLAR              | Raft     | 1                     | 1       | 2       | 0       | RPL5        | IPI00000494 | 60S ribosomal protein L5                                                           | 100     |                          |             |          |
| 229 | VTNRDIIC QIAYAR                 | Raft     | 1                     | 0       | 1       | 0       | RPL5        | IPI00000494 | 60S ribosomal protein L5                                                           | 62      |                          |             |          |
| 230 | CPFTGNVSIR                      | Non-raft | 1                     | 0       | 0       | 0       | RPS11       | IPI00025091 | 40S ribosomal protein S11                                                          | 60      |                          |             |          |
| 231 | LGEWVGLCK                       | Raft     | 0                     | 0       | 1       | 0       | RPS12       | IPI00013917 | 40S ribosomal protein S12                                                          | 92      |                          |             |          |
| 232 | GCTATLGNFAK                     | Raft     | 0                     | 0       | 1       | 0       | RPS2        | IPI00013485 | 40S ribosomal protein S2                                                           | 229     |                          |             |          |
| 233 | GLCAIAQAESLR                    | Non-raft | 1                     | 0       | 0       | 0       | RPS3        | IPI00011253 | 40S ribosomal protein S3                                                           | 97      |                          |             |          |
|     |                                 | Raft     | 1                     | 1       | 1       | 0       | RPS3        | IPI00011253 | 40S ribosomal protein S3                                                           | 97      |                          |             |          |
| 234 | TIAECLADELINA AK                | Non-raft | 1                     | 0       | 1       | 1       | RPS5        | IPI00008433 | 40S ribosomal protein S5                                                           | 172     |                          |             |          |
|     |                                 | Raft     | 0                     | 0       | 2       | 1       | RPS5        | IPI00008433 | 40S ribosomal protein S5                                                           | 172     |                          |             |          |
| 235 | VNQAIWLLCTGAR                   | Raft     | 2                     | 0       | 1       | 0       | RPS5        | IPI00008433 | 40S ribosomal protein S5                                                           | 155     |                          |             |          |
| 236 | ADHQPLTEASYVNLPTIALCNTDSPLR     | Raft     | 1                     | 1       | 1       | 0       | RPSA        | IPI00413108 | Ribosomal protein SA                                                               | 153     |                          |             |          |
| 237 | NTSAVLGCLA EK                   | Non-raft | 1                     | 0       | 1       | 0       | RSPRY1      | IPI00061267 | Ring finger and SPRY domain containing 1                                           | 208     |                          |             |          |
|     |                                 | Raft     | 1                     | 0       | 1       | 0       | RSPRY1      | IPI00061267 | Ring finger and SPRY domain containing 1                                           | 208     |                          |             |          |
| 238 | YSNSALGHVNC TIK                 | Non-raft | 1                     | 0       | 0       | 0       | RTN4        | IPI00021766 | Isoform 1 of Reticulon-4                                                           | 1101    |                          |             |          |
| 239 | LLETECPQYIR                     | Non-raft | 1                     | 1       | 2       | 2       | S100A8      | IPI00007047 | Protein S100-A8                                                                    | 42      |                          |             |          |
| 240 | QNNWPPLPSWCPVKPCFYQDFSTEIPADYQR | Non-raft | 1                     | 0       | 0       | 0       | SCAMP2      | IPI00218850 | Secretory carrier-associated membrane protein 2                                    | 127/132 |                          |             |          |
| 241 | QNNWPPLPSFCPVQPCFFQDISMEIPQEFQK | Non-raft | 1                     | 0       | 0       | 0       | SCAMP3      | IPI00306382 | Isoform 1 of Secretory carrier-associated membrane protein 3                       | 142/147 |                          |             |          |
| 242 | SQEKCYLFWSSSK                   | Non-raft | 1                     | 0       | 0       | 0       | SCARB1      | IPI00177968 | Isoform 1 of Scavenger receptor class B member 1                                   | 470     |                          |             |          |
| 243 | AITIANQTNCLPYITK                | Non-raft | 1                     | 0       | 0       | 0       | SDF2L1      | IPI00106642 | Dihydropyrimidinase-like 2                                                         | 248     |                          |             |          |
| 244 | VGSVLQEGCGK                     | Non-raft | 0                     | 1       | 0       | 0       | SDHA        | IPI00305166 | Succinate dehydrogenase [ubiquinone] flavoprotein subunit, mitochondrial precursor | 536     |                          |             |          |
| 245 | SPAESAAAGLTC LPSVTR             | Non-raft | 0                     | 0       | 1       | 0       | SFT2D3      | IPI00166444 | Vesicle transport protein SFT2C                                                    | 67      |                          |             |          |
| 246 | AALEALGSC LNNK                  | Non-raft | 1                     | 0       | 0       | 0       | SHMT2       | IPI00002520 | Serine hydroxymethyltransferase, mitochondrial precursor                           | 91      |                          |             |          |
| 247 | LGLQCLPSDGVQNVNQ                | Non-raft | 0                     | 0       | 1       | 0       | SLC19A1     | IPI00375452 | Folate transporter 1                                                               | 580     |                          |             |          |
| 248 | GLAAAAPTANGGLALASIEDQGAAGGYCGSR | Non-raft | 3                     | 0       | 1       | 0       | SLC1A5      | IPI00019472 | Neutral amino acid transporter B(0)                                                | 39      |                          |             |          |

| No. | Sequence                                            | Fraction | Biological Replicates |         |         |         | Gene Symbol | Acc.Number  | Description                                                                     | Site           | Reference                | Known Sites | Organism |
|-----|-----------------------------------------------------|----------|-----------------------|---------|---------|---------|-------------|-------------|---------------------------------------------------------------------------------|----------------|--------------------------|-------------|----------|
|     |                                                     |          | 1st EXP               | 1st CON | 2nd EXP | 2nd CON |             |             |                                                                                 |                |                          |             |          |
| 249 | SCVTVLNVEGDALGAGLLQNYVDRTESR                        | Non-raft | 2                     | 0       | 1       | 0       | SLC1A5      | IPI00019472 | Neutral amino acid transporter B(0)                                             | 467            |                          |             |          |
| 250 | SSVTHLLCASK                                         | Non-raft | 1                     | 0       | 1       | 0       | SLC38A2     | IPI00410034 | Putative 40-9-1 protein                                                         | 403            |                          |             |          |
| 251 | IGSSELQEF <sup>C</sup> PTILQQLDSR                   | Non-raft | 2                     | 0       | 1       | 0       | SLC39A14    | IPI00014236 | KIAA0062 protein                                                                | 118            |                          |             |          |
| 252 | LVSGYDSYGNI <sup>C</sup> GQK                        | Non-raft | 2                     | 0       | 2       | 0       | SLC44A1     | IPI00221393 | Isoform 1 of Choline transporter-like protein 1                                 | 69             |                          |             |          |
| 253 | SVAL <sup>C</sup> VAA <sup>C</sup> PCR              | Non-raft | 1                     |         | 0       |         | SLC44A1     | IPI00221393 | Isoform 1 of Choline transporter-like protein 1                                 | 117            |                          |             |          |
| 254 | IFDDSP <sup>C</sup> PFTAK                           | Non-raft | 1                     |         | 0       |         | SLC44A2     | IPI00293074 | Isoform 2 of Choline transporter-like protein 2                                 | 399            |                          |             |          |
| 255 | LLSLLPLS <sup>C</sup> QK                            | Non-raft | 1                     |         | 0       |         | SLC5A6      | IPI00031822 | Sodium-dependent multivitamin transporter                                       | 577            |                          |             |          |
| 256 | CCGL <sup>C</sup> V <sup>C</sup> PC <sup>C</sup> NR | Raft     | 1                     | 0       | 0       | 0       | SNAP23      | IPI00010438 | Isoform SNAP-23a of Synaptosomal-associated protein 23                          | 79/80/83/85/87 | <a href="#">12551899</a> | 80/83/85/87 | Human    |
| 257 | TTWGDGGENSP <sup>C</sup> NVVSK                      | Non-raft | 1                     | 0       | 1       | 0       | SNAP23      | IPI00010438 | Isoform SNAP-23a of Synaptosomal-associated protein 23                          | 112            |                          |             |          |
|     |                                                     | Raft     | 1                     | 0       | 0       | 0       | SNAP23      | IPI00010438 | Isoform SNAP-23a of Synaptosomal-associated protein 23                          | 112            |                          |             |          |
| 258 | LLQEIVDQ <sup>C</sup> MNR                           | Non-raft | 1                     | 0       | 0       | 0       | SPTLC1      | IPI00005745 | Serine palmitoyltransferase 1                                                   | 419            |                          |             |          |
| 259 | GPGLFFILP <sup>C</sup> DTDSFIK                      | Non-raft | 1                     | 0       | 1       | 0       | STOM        | IPI00219682 | Erythrocyte band 7 integral membrane protein                                    | 87             | <a href="#">10338112</a> | 30/87       | Human    |
|     |                                                     | Raft     | 2                     | 0       | 0       | 0       | STOM        | IPI00219682 | Erythrocyte band 7 integral membrane protein                                    | 87             |                          |             |          |
| 260 | L <sup>C</sup> LISTFLEDGIR                          | Non-raft | 0                     | 0       | 2       | 0       | SURF4       | IPI00399142 | Surfeit 4                                                                       | 32             |                          |             |          |
| 261 | LFGNMEGD <sup>C</sup> PSDWKTDSTCR                   | Non-raft | 1                     | 0       | 1       | 0       | TFRC        | IPI00022462 | Transferrin receptor protein 1                                                  | 363            | <a href="#">2398066</a>  | 62/67       | Human    |
| 262 | SEGTY <sup>C</sup> CGPVPVR                          | Non-raft | 1                     | 0       | 0       | 0       | TGM2        | IPI00294578 | Isoform 1 of Protein-glutamine gamma-glutamyltransferase 2                      | 370            |                          |             |          |
| 263 | SEGTY <sup>C</sup> CGPVPVR                          | Non-raft | 0                     | 1       | 0       | 0       | TGM2        | IPI00294578 | Isoform 1 of Protein-glutamine gamma-glutamyltransferase 2                      | 370/371        |                          |             |          |
| 264 | TVSYNGILGPE <sup>C</sup> GTK                        | Non-raft | 0                     | 1       | 0       | 0       | TGM2        | IPI00294578 | Isoform 1 of Protein-glutamine gamma-glutamyltransferase 2                      | 524            |                          |             |          |
| 265 | SQGVFQ <sup>C</sup> GPASVIGVR                       | Non-raft | 0                     | 2       | 0       | 0       | TGM3        | IPI00300376 | Protein-glutamine gamma-glutamyltransferase E precursor                         | 367            |                          |             |          |
|     |                                                     | Raft     | 0                     | 1       | 0       | 0       | TGM3        | IPI00300376 | Protein-glutamine gamma-glutamyltransferase E precursor                         | 367            |                          |             |          |
| 266 | VLTAAGNS <sup>C</sup> CR                            | Raft     | 1                     | 0       | 0       | 0       | THOC6       | IPI00301252 | Isoform 3 of THO complex subunit 6 homolog                                      | 279            |                          |             |          |
| 267 | CSE <sup>C</sup> CIDWGEKR                           | Raft     | 2                     | 0       | 0       | 0       | TMEM50A     | IPI00000612 | Transmembrane protein 50A                                                       | 10/13          |                          |             |          |
| 268 | DNGF <sup>C</sup> CSWLTAIFR                         | Non-raft | 0                     | 0       | 1       | 0       | TMEM63B     | IPI00514538 | transmembrane protein 63B                                                       | 126            |                          |             |          |
|     |                                                     | Raft     | 1                     | 0       | 0       | 0       | TMEM63B     | IPI00514538 | transmembrane protein 63B                                                       | 126            |                          |             |          |
| 269 | NTA <sup>C</sup> QCKPGTFR                           | Non-raft | 2                     | 0       | 0       | 0       | TNFRSF10A   | IPI00021975 | Tumor necrosis factor receptor superfamily member 10A precursor                 | 188/190        |                          |             |          |
| 270 | NTA <sup>C</sup> QCKPGTFR                           | Non-raft | 1                     | 0       | 0       | 0       | TNFRSF10A   | IPI00021975 | Tumor necrosis factor receptor superfamily member 10A precursor                 | 188            |                          |             |          |
| 271 | YGQDYSTHWNDLLF <sup>C</sup> CLR                     | Non-raft | 1                     | 0       | 0       | 0       | TNFRSF10B   | IPI00296379 | Isoform Long of Tumor necrosis factor receptor superfamily member 10B precursor | 113            |                          |             |          |
| 272 | LLEQAEAE <sup>C</sup> GQR                           | Non-raft | 1                     | 0       | 0       | 0       | TNFRSF10D   | IPI00294516 | Tumor necrosis factor receptor superfamily member 10D precursor                 | 326            |                          |             |          |
| 273 | VFLDNNPWVCD <sup>C</sup> HMADMVTWLK                 | Non-raft | 1                     | 0       | 0       | 0       | TPBG        | IPI00009111 | Trophoblast glycoprotein precursor                                              | 298/300        |                          |             |          |
| 274 | IAVAAQN <sup>C</sup> CYK                            | Non-raft | 0                     | 1       | 0       | 0       | TPI1        | IPI00465028 | Triosephosphate isomerase 1 variant                                             | 104            |                          |             |          |
| 275 | IYGGSVTGAT <sup>C</sup> K                           | Non-raft | 1                     | 1       | 1       | 0       | TPI1        | IPI00465028 | Triosephosphate isomerase 1 variant                                             | 255            |                          |             |          |
| 276 | VVNTQ <sup>C</sup> GYDVR                            | Non-raft | 0                     | 0       | 1       | 0       | TSPAN14     | IPI00165394 | Isoform 2 of Tetraspanin-14                                                     | 183            |                          |             |          |
| 277 | AV <sup>C</sup> MLSNTTAAIEAWAR                      | Non-raft | 0                     | 0       | 0       | 1       | TUBA1A      | IPI00180675 | Tubulin alpha-3 chain                                                           | 376            | <a href="#">9247644</a>  | 20/213/376  | Porcine  |
|     |                                                     | Non-raft | 0                     | 0       | 0       | 1       | TUBA1B      | IPI00387144 | Tubulin alpha-ubiquitous chain                                                  | 376            |                          |             |          |
|     |                                                     | Non-raft | 0                     | 0       | 0       | 1       | TUBA8       | IPI00646909 | Tubulin alpha-8 chain                                                           | 376            |                          |             |          |
| 278 | TIQFVDW <sup>C</sup> PTGFK                          | Non-raft | 0                     | 1       | 0       | 0       | TUBA1A      | IPI00180675 | Tubulin alpha-3 chain                                                           | 347            |                          |             |          |
|     |                                                     | Non-raft | 0                     | 1       | 0       | 0       | TUBA1C      | IPI00218343 | Tubulin alpha-6 chain                                                           | 347            |                          |             |          |
|     |                                                     | Non-raft | 0                     | 1       | 0       | 0       | TUBA8       | IPI00646909 | Tubulin alpha-8 chain                                                           | 347            |                          |             |          |
| 279 | YMAC <sup>C</sup> LLYR                              | Non-raft | 1                     | 0       | 0       | 0       | TUBA1A      | IPI00180675 | Tubulin alpha-3 chain                                                           | 316            |                          |             |          |
|     |                                                     | Non-raft | 1                     | 0       | 0       | 0       | TUBA1B      | IPI00387144 | Tubulin alpha-ubiquitous chain                                                  | 316            |                          |             |          |
|     |                                                     | Non-raft | 1                     | 0       | 0       | 0       | TUBA1C      | IPI00218343 | Tubulin alpha-6 chain                                                           | 316            |                          |             |          |

| No. | Sequence                                  | Fraction | Biological Replicates |         |         |         | Gene Symbol | Acc.Number  | Description                                                      | Site    | Reference               | Known Sites  | Organism |
|-----|-------------------------------------------|----------|-----------------------|---------|---------|---------|-------------|-------------|------------------------------------------------------------------|---------|-------------------------|--------------|----------|
|     |                                           |          | 1st EXP               | 1st CON | 2nd EXP | 2nd CON |             |             |                                                                  |         |                         |              |          |
|     |                                           | Non-raft | 1                     | 0       | 0       | 0       | TUBA4A      | IPI00007750 | Tubulin alpha-1 chain                                            | 316     |                         |              |          |
| 280 | SIQFVDW <u>C</u> PTGFK                    | Non-raft | 1                     | 1       | 0       | 1       | TUBA1B      | IPI00387144 | Tubulin alpha-ubiquitous chain                                   | 347     |                         |              |          |
|     |                                           | Raft     | 0                     | 1       | 0       | 0       | TUBA1B      | IPI00387144 | Tubulin alpha-ubiquitous chain                                   | 347     |                         |              |          |
|     |                                           | Non-raft | 1                     | 1       | 0       | 0       | TUBA4A      | IPI00007750 | Tubulin alpha-1 chain                                            | 347     |                         |              |          |
| 281 | TAV <u>C</u> DIPPR                        | Non-raft | 0                     | 0       | 0       | 1       | TUBB        | IPI00011654 | Tubulin beta-2 chain                                             | 354     |                         |              |          |
|     |                                           | Non-raft | 0                     | 0       | 0       | 1       | TUBB2A      | IPI00013475 | tubulin, beta 2                                                  | 354     |                         |              |          |
|     |                                           | Non-raft | 0                     | 0       | 0       | 1       | TUBB2C      | IPI00007752 | Tubulin beta-2C chain                                            | 354     |                         |              |          |
| 282 | FIITALPTIYH <u>C</u> K                    | Non-raft | 0                     | 0       | 1       | 0       | TXNDC1      | IPI00395887 | Thioredoxin domain-containing protein 1 precursor                | 116     |                         |              |          |
| 283 | WGLGGT <u>C</u> VNVG <u>C</u> IPK         | Non-raft | 1                     | 0       | 1       | 0       | TXNRD1      | IPI00554786 | Thioredoxin reductase 1, cytoplasmic precursor                   | 64      |                         |              |          |
|     |                                           | Non-raft | 1                     | 0       | 1       | 0       | TXNRD2      | IPI00157820 | Isoform 2 of Thioredoxin reductase 2, mitochondrial precursor    | 91      |                         |              |          |
| 284 | FSAVAL <u>C</u> K                         | Non-raft | 1                     | 0       | 0       | 0       | UCHL1       | IPI00018352 | Ubiquitin carboxyl-terminal hydrolase isozyme L1                 | 220     |                         |              |          |
| 285 | QTIGNS <u>C</u> GITGLIHAVANNQDKLGFEDGSVLK | Non-raft | 0                     | 0       | 1       | 0       | UCHL1       | IPI00018352 | Ubiquitin carboxyl-terminal hydrolase isozyme L1                 | 90      |                         |              |          |
| 286 | <u>A</u> CGLNFADLMAR                      | Non-raft | 0                     | 1       | 0       | 0       | VAT1        | IPI00156689 | Synaptic vesicle membrane protein VAT-1 homolog                  | 86      |                         |              |          |
| 287 | AIANE <u>C</u> QANFISIK                   | Non-raft | 1                     | 0       | 0       | 1       | VCP         | IPI00022774 | Transitional endoplasmic reticulum ATPase                        | 535     |                         |              |          |
| 288 | GVLFGPPG <u>C</u> CGK                     | Non-raft | 1                     | 0       | 0       | 0       | VCP         | IPI00022774 | Transitional endoplasmic reticulum ATPase                        | 522     |                         |              |          |
| 289 | LGDVISIQ <u>P</u> CPDVK                   | Non-raft | 1                     | 1       | 1       | 1       | VCP         | IPI00022774 | Transitional endoplasmic reticulum ATPase                        | 105     |                         |              |          |
| 290 | QAAP <u>C</u> VLFDELDLSIAK                | Non-raft | 1                     | 1       | 0       | 0       | VCP         | IPI00022774 | Transitional endoplasmic reticulum ATPase                        | 572     |                         |              |          |
| 291 | YQIDPDA <u>C</u> FSAK                     | Non-raft | 1                     | 1       | 0       | 0       | VDAC1       | IPI00216308 | Voltage-dependent anion-selective channel protein 1              | 232     |                         |              |          |
| 292 | ATHGQT <u>C</u> ARPM <u>C</u> IPPSYADLGK  | Non-raft | 1                     | 0       | 0       | 0       | VDAC2       | IPI00216026 | Isoform 1 of Voltage-dependent anion-selective channel protein 2 | 8/13    |                         |              |          |
| 293 | ATHGQT <u>C</u> ARPM <u>C</u> IPPSYADLGK  | Non-raft | 1                     | 1       | 0       | 0       | VDAC2       | IPI00216026 | Isoform 1 of Voltage-dependent anion-selective channel protein 2 | 8       |                         |              |          |
| 294 | QVQSLT <u>C</u> EVDAKGTNESLER             | Raft     | 1                     | 0       | 0       | 0       | VIM         | IPI00418471 | Vimentin                                                         | 328     |                         |              |          |
| 295 | AANILVGENLV <u>C</u> K                    | Non-raft | 0                     | 0       | 1       | 0       | YES1        | IPI00013981 | Proto-oncogene tyrosine-protein kinase Yes                       | 410     | <a href="#">7980442</a> | 3 (probable) | Monkey   |
|     |                                           | Raft     | 0                     | 0       | 1       | 0       | YES1        | IPI00013981 | Proto-oncogene tyrosine-protein kinase Yes                       | 410     |                         |              |          |
| 296 | GGVNPFTNG <u>C</u> CNNVSR                 | Non-raft | 1                     | 0       | 0       | 0       | ZDHHC5      | IPI00328272 | Isoform 1 of Probable palmitoyltransferase ZDHHC5                | 236/237 |                         |              |          |
| 297 | V <u>L</u> CSSPAPR                        | Non-raft | 1                     | 0       | 0       | 0       | ZDHHC5      | IPI00328272 | Isoform 1 of Probable palmitoyltransferase ZDHHC5                | 245     |                         |              |          |
| 298 | TFFTSP <u>C</u> TEEPR                     | Non-raft | 2                     | 0       | 0       | 0       | ZDHHC6      | IPI00008350 | Isoform 1 of Probable palmitoyltransferase ZDHHC6                | 343     |                         |              |          |

**Note 1.** No. = Number (see the 1st column).

**Note 2.** Acc. Number = Accession Number (see the 9th column)

**Note 3.** The peptide sequences (see the 2nd column) were assorted according to the Gene Symbols (see the 8th column).

**Note 4.** The peptide sequences (see the 2nd column) are only representative, since a maximum of one miscleavage gives rise to a maximum of 3 unique peptides.

**Note 5.** Cysteins in blue (bold and underlined, see the 2nd column) were carbamidomethylated, indicating they were potentially S-acylated prior to ABE reaction. Cysteines in red were modified by N-ethylmaleimide, indicating they were originally non-acylated.

**Table S5. Localization of S-acylation sites using the peptide-based procedure.**

| No. | Sequence                                               | Precursor m/z | Charge | Score | Fraction | Replicate      |     |          |     |                |     |          |     | Total EXP Each Fraction | Total CON Each Fraction | Total EXP Both Fractions | Total CON Both Fractions | EXP/CON Ratio | Ln(EXP/CON) | P-value | Gene Symbol | Acc.Number  | Description                                                       | Site                                                                      |    |
|-----|--------------------------------------------------------|---------------|--------|-------|----------|----------------|-----|----------|-----|----------------|-----|----------|-----|-------------------------|-------------------------|--------------------------|--------------------------|---------------|-------------|---------|-------------|-------------|-------------------------------------------------------------------|---------------------------------------------------------------------------|----|
|     |                                                        |               |        |       |          | 1st Biological |     |          |     | 2nd Biological |     |          |     |                         |                         |                          |                          |               |             |         |             |             |                                                                   |                                                                           |    |
|     |                                                        |               |        |       |          | 1st Tech       |     | 2nd Tech |     | 1st Tech       |     | 2nd Tech |     |                         |                         |                          |                          |               |             |         |             |             |                                                                   |                                                                           |    |
|     |                                                        |               |        |       |          | EXP            | CON | EXP      | CON | EXP            | CON | EXP      | CON |                         |                         |                          |                          |               |             |         |             |             |                                                                   |                                                                           |    |
| 1   | <b>MLITSQAMDILR</b> <u>CN</u> PQK                      | 495.50        | 4      | 47.0  | Non-raft | 1              | 0   | 0        | 0   | 0              | 0   | 0        | 0   | 1                       | 0                       | 3                        | 1                        | 3.00          | 1.099       | 0.016   | -           | IPI00022913 | PRO1575                                                           | 13                                                                        |    |
|     |                                                        | 495.55        | 4      | 48.7  | Raft     | 1              | 0   | 0        | 1   | 0              | 0   | 1        | 0   | 2                       | 1                       |                          |                          |               |             |         | -           | IPI00022913 | PRO1575                                                           |                                                                           |    |
| 2   | TLACAGLDV <u>CC</u> EGSEAGDAGTAGSSAR                   | 650.45        | 4      | 47.0  | Non-raft | 0              | 0   | 0        | 0   | 0              | 1   | 0        | 0   | 0                       | 1                       | 0                        | 1                        |               |             |         | -           | IPI00024270 | Hypothetical protein                                              |                                                                           |    |
| 3   | ADDLDFETGDAGASATFPM <u>QC</u> SALRK                    | 920.71        | 3      | 81.0  | Non-raft | 0              | 0   | 0        | 1   | 2              | 0   | 0        | 1   | 2                       | 2                       | 7                        | 5                        | 1.40          | 0.336       | 0.284   | -           | IPI00218084 | PREDICTED: similar to eukaryotic translation initiation factor 5A |                                                                           |    |
|     |                                                        | 920.61        | 3      | 92.3  | Raft     | 1              | 1   | 1        | 2   | 1              | 0   | 2        | 0   | 5                       | 3                       |                          |                          |               |             |         | -           | IPI00218084 | PREDICTED: similar to eukaryotic translation initiation factor 5A |                                                                           |    |
| 4   | WEPGMVGAASSAAGESV <u>CV</u> QGCGR                      | 599.71        | 4      | 44.3  | Non-raft | 0              | 0   | 0        | 0   | 0              | 0   | 0        | 1   | 0                       | 1                       | 0                        | 1                        |               |             |         | -           | IPI00295844 | OTTHUMP0000031441                                                 |                                                                           |    |
| 5   | AALFPQTTEEDSISVSDAPG <u>SC</u> IIDCNENTR               | 1105.20       | 3      | 55.7  | Raft     | 1              | 0   | 0        | 0   | 0              | 0   | 0        | 0   | 1                       | 0                       | 1                        | 0                        |               |             |         | -           | IPI00429529 | HERV-K_12q14.1 provirus ancestral Gag polyprotein                 | 111/115                                                                   |    |
| 6   | FISEPSTYVPAGSSATAWLARI <u>LC</u> QAR                   | 697.14        | 4      | 55.5  | Non-raft | 0              | 0   | 0        | 1   | 0              | 0   | 0        | 0   | 0                       | 1                       | 0                        | 1                        |               |             |         | -           | IPI00447734 | Em.AC008101.5 protein                                             |                                                                           |    |
| 7   | <b>G</b> CGRPGESSGR                                    | 355.21        | 3      | 46.8  | Non-raft | 1              | 0   | 0        | 0   | 0              | 0   | 0        | 0   | 1                       | 0                       | 1                        | 0                        |               |             |         | -           | IPI00514009 | Novel protein                                                     | 213                                                                       |    |
| 8   | SEDPKIHMAISISLFLNLTLFNLVNGSSSQGPPAS <u>CW</u> VR       | 1076.36       | 4      | 44.2  | Raft     | 0              | 1   | 0        | 0   | 0              | 0   | 0        | 0   | 0                       | 1                       | 0                        | 1                        |               |             |         | -           | IPI00552637 | G-protein coupled receptor                                        |                                                                           |    |
| 9   | NVLQL <u>LC</u> CRMK                                   | 359.32        | 4      | 46.5  | Raft     | 0              | 0   | 0        | 0   | 0              | 0   | 0        | 1   | 0                       | 1                       | 0                        | 1                        |               |             |         | -           | IPI00644570 | 18 kDa protein                                                    |                                                                           |    |
| 10  | LSATIASGYCGSDAM <u>CL</u> VLR                          | 682.02        | 3      | 44.8  | Raft     | 0              | 1   | 0        | 0   | 0              | 0   | 0        | 0   | 0                       | 1                       | 0                        | 1                        |               |             |         | -           | IPI00646048 | Novel protein                                                     |                                                                           |    |
| 11  | LVIAAADPGARVGS <u>CL</u> GISAGIHLGEATGR                | 974.39        | 3      | 48.4  | Raft     | 0              | 0   | 0        | 1   | 0              | 0   | 0        | 0   | 0                       | 1                       | 0                        | 1                        |               |             |         | -           | IPI00737515 | PREDICTED: similar to Unc4.1 homeobox                             |                                                                           |    |
| 12  | LGSPGCPGSPVAGTVHHPAQRPLAR                              | 631.33        | 4      | 49.6  | Raft     | 0              | 1   | 0        | 0   | 0              | 0   | 0        | 0   | 0                       | 1                       | 0                        | 1                        |               |             |         | -           | IPI00737760 | PREDICTED: similar to BAH domain and coiled-coil containing 1     |                                                                           |    |
| 13  | <b>K</b> CLLLL <u>CL</u> QLR                           | 601.61        | 2      | 61.0  | Non-raft | 0              | 0   | 1        | 0   | 1              | 0   | 1        | 0   | 3                       | 0                       | 6                        | 0                        |               |             | H       | -           | IPI00747966 | Conserved hypothetical protein                                    | 87/92                                                                     |    |
|     |                                                        | 601.63        | 2      | 65.5  | Raft     | 1              | 0   | 0        | 0   | 1              | 0   | 1        | 0   | 3                       | 0                       |                          |                          |               |             |         | -           | IPI00747966 | Conserved hypothetical protein                                    |                                                                           |    |
| 14  | ASHQAGLV <u>CSS</u> QGRPEG <u>CG</u> DGR               | 550.32        | 4      | 47.2  | Raft     | 0              | 0   | 1        | 0   | 0              | 0   | 0        | 0   | 1                       | 0                       | 1                        | 0                        |               |             |         | -           | IPI00748363 | Similar to UDP-glucuronate decarboxylase                          | 96                                                                        |    |
| 15  | HLNLGHPV <u>CT</u> LSK                                 | 355.33        | 4      | 55.6  | Non-raft | 0              | 0   | 0        | 1   | 0              | 0   | 0        | 0   | 0                       | 1                       | 0                        | 1                        |               |             |         | -           | IPI00748374 | Similar to Ras suppressor protein 1                               |                                                                           |    |
| 16  | LRISSLLH <u>CS</u> SSSDTLDR                            | 722.44        | 3      | 56.3  | Non-raft | 0              | 0   | 0        | 0   | 0              | 1   | 0        | 2   | 0                       | 3                       | 2                        | 4                        | 0.50          | -0.693      | 0.942   | -           | IPI00749362 | CDNA FLJ38877 fis, clone MESAN2015277                             |                                                                           |    |
|     |                                                        | 722.30        | 3      | 50.7  | Raft     | 1              | 0   | 1        | 1   | 0              | 0   | 0        | 0   | 2                       | 1                       |                          |                          |               |             |         | -           | IPI00749362 | CDNA FLJ38877 fis, clone MESAN2015277                             |                                                                           |    |
| 17  | MPSFHVLAQ <u>CL</u> GGPRNPLLGVEALFMT <u>CP</u> SLLR    | 907.53        | 4      | 44.1  | Raft     | 0              | 1   | 0        | 0   | 0              | 0   | 0        | 0   | 0                       | 1                       | 0                        | 1                        |               |             |         | AAAS        | IPI00792062 | 7 kDa protein                                                     |                                                                           |    |
| 18  | CAAAGSSSSGSAALDAD <u>CRL</u> K                         | 552.84        | 4      | 46.2  | Raft     | 1              | 0   | 0        | 0   | 0              | 0   | 0        | 0   | 1                       | 0                       | 1                        | 0                        |               |             |         | ABHD12      | IPI00060569 | Isoform 2 of Abhydrolase domain-containing protein 12             | 34                                                                        |    |
| 19  | PQAAP <u>CL</u> SGAPQASAADV>VVHGGR                     | 576.66        | 4      | 54.6  | Non-raft | 0              | 0   | 1        | 0   | 0              | 0   | 0        | 0   | 1                       | 0                       | 1                        | 1                        | 1.00          | 0.000       | 0.551   | ACAA1       | IPI00011522 | Homo sapiens clone 23623                                          |                                                                           |    |
|     |                                                        | 576.63        | 4      | 48.9  | Raft     | 0              | 0   | 0        | 0   | 0              | 1   | 0        | 0   | 0                       | 1                       |                          |                          |               |             |         | ACAA1       | IPI00011522 | Homo sapiens clone 23623                                          |                                                                           |    |
| 20  | GVAAL <u>CI</u> GGGMGIAM <u>CV</u> QR                  | 456.89        | 4      | 47.7  | Raft     | 1              | 0   | 0        | 0   | 0              | 0   | 0        | 0   | 1                       | 0                       | 1                        | 0                        |               |             |         | ACAT2       | IPI00291419 | Acetyl-CoA acetyltransferase, cytosolic                           | 383/393                                                                   |    |
| 21  | TGATRGAQEP <u>CS</u> VVWPEPK                           | 479.31        | 4      | 45.8  | Raft     | 0              | 0   | 0        | 0   | 0              | 0   | 0        | 1   | 0                       | 1                       | 0                        | 1                        |               |             |         | ACD         | IPI00254484 | Isoform 1 of Adrenocortical dysplasia protein homolog             |                                                                           |    |
| 22  | FRCPETLFQPSFIGMESAGIHETTYSIMK                          | 1146.05       | 3      | 46.6  | Non-raft | 0              | 1   | 0        | 0   | 0              | 0   | 0        | 0   | 0                       | 1                       | 0                        | 1                        |               |             |         | ACTA1       | IPI00021428 | Actin, alpha skeletal muscle                                      |                                                                           |    |
| 23  | <b>FR</b> CP <u>EA</u> LFQPSFLGM <u>ES</u> GIHETTFSIMK | 1183.39       | 3      | 115.6 | Non-raft | 3              | 0   | 1        | 0   | 2              | 0   | 0        | 0   | 6                       | 0                       | 19                       | 0                        |               |             | H       | ACTB        | IPI00021439 | Actin, cytoplasmic 1                                              | 272                                                                       |    |
|     |                                                        |               |        |       |          |                |     |          |     |                |     |          |     | 0                       | 0                       |                          |                          |               |             |         | ACTG1       | IPI00021440 | Actin, cytoplasmic 2                                              | 272                                                                       |    |
|     |                                                        | 1183.33       | 3      | 114.6 | Raft     | 6              | 0   | 5        | 0   | 1              | 0   | 1        | 0   | 13                      | 0                       |                          |                          |               |             |         |             | ACTB        | IPI00021439                                                       | Actin, cytoplasmic 1                                                      |    |
|     |                                                        |               |        |       |          |                |     |          |     |                |     |          |     | 0                       | 0                       |                          |                          |               |             |         |             | ACTG1       | IPI00021440                                                       | Actin, cytoplasmic 2                                                      |    |
| 24  | <b>LCY</b> VALDFEQEMATAASSSSLEK                        | 832.52        | 3      | 51.3  | Raft     | 0              | 0   | 1        | 1   | 0              | 0   | 0        | 0   | 1                       | 1                       | 1                        | 1                        | 1.00          | 0.000       | 0.551   | ACTB        | IPI00021439 | Actin, cytoplasmic 1                                              |                                                                           |    |
|     |                                                        |               |        |       |          |                |     |          |     |                |     |          |     | 0                       | 0                       |                          |                          |               |             |         |             | ACTG1       | IPI00021440                                                       | Actin, cytoplasmic 2                                                      |    |
| 25  | DDIAALVVDNNGSGM <u>CK</u>                              | 883.41        | 2      | 137.8 | Non-raft | 6              | 8   | 6        | 8   | 5              | 10  | 7        | 8   | 24                      | 34                      | 80                       | 82                       | 0.98          | -0.025      | 0.571   | ACTB        | IPI00021439 | Actin, cytoplasmic 1                                              |                                                                           |    |
|     |                                                        | 883.59        | 2      | 145.9 | Raft     | 16             | 17  | 14       | 13  | 14             | 10  | 12       | 8   | 56                      | 48                      |                          |                          |               |             |         |             | ACTB        | IPI00021439                                                       | Actin, cytoplasmic 1                                                      |    |
| 26  | EEEEIALVIDNNGSGM <u>CK</u>                             | 911.15        | 2      | 114.8 | Non-raft | 4              | 7   | 1        | 7   | 5              | 11  | 5        | 8   | 15                      | 33                      | 77                       | 87                       | 0.89          | -0.122      | 0.649   | ACTG1       | IPI00021440 | Actin, cytoplasmic 2                                              |                                                                           |    |
|     |                                                        | 919.04        | 2      | 144.7 | Raft     | 17             | 15  | 17       | 16  | 14             | 15  | 14       | 8   | 62                      | 54                      |                          |                          |               |             |         |             | ACTG1       | IPI00021440                                                       | Actin, cytoplasmic 2                                                      |    |
| 27  | ELPPDQAEY <u>CI</u> AR                                 | 752.86        | 2      | 47.6  | Non-raft | 0              | 1   | 0        | 0   | 0              | 0   | 0        | 0   | 0                       | 1                       | 12                       | 9                        | 1.33          | 0.288       | 0.320   | ACTN4       | IPI00013808 | Alpha-actinin-4                                                   |                                                                           |    |
|     |                                                        | 753.09        | 2      | 63.3  | Raft     | 3              | 4   | 5        | 4   | 2              | 0   | 2        | 0   | 12                      | 8                       |                          |                          |               |             |         |             | ACTN4       | IPI00013808                                                       | Alpha-actinin-4                                                           |    |
| 28  | <b>CQ</b> LEINFNTLQTK                                  | 776.70        | 2      | 97.1  | Raft     | 0              | 0   | 2        | 0   | 0              | 0   | 0        | 0   | 2                       | 0                       | 2                        | 0                        |               |             | M       | ACTN4       | IPI00013808 | Alpha-actinin-4                                                   | 351                                                                       |    |
| 29  | AGRLPACVVD <u>CG</u> TGYTK                             | 939.77        | 2      | 56.5  | Non-raft | 1              | 1   | 0        | 0   | 0              | 0   | 0        | 0   | 1                       | 1                       | 1                        | 1                        | 1.00          | 0.000       | 0.551   | ACTR3       | IPI00028091 | Actin-like protein 3                                              |                                                                           |    |
| 30  | AGRLPACVVD <u>CG</u> TGYTK                             | 940.21        | 2      | 47.1  | Non-raft | 1              | 1   | 2        | 2   | 1              | 2   | 0        | 2   | 4                       | 7                       | 5                        | 8                        | 0.63          | -0.470      | 0.865   | ACTR3       | IPI00028091 | Actin-like protein 3                                              |                                                                           |    |
|     |                                                        | 939.51        | 2      | 65.4  | Raft     | 1              | 1   | 0        | 0   | 0              | 0   | 0        | 0   | 1                       | 1                       |                          |                          |               |             |         |             | ACTR3       | IPI00028091                                                       | Actin-like protein 3                                                      |    |
| 31  | <b>CG</b> VGCGGDNKS <u>CK</u>                          | 474.10        | 3      | 46.7  | Raft     | 0              | 0   | 0        | 1   | 0              | 0   | 0        | 0   | 0                       | 1                       | 0                        | 1                        |               |             |         |             | ADAMTS15    | IPI00152637                                                       | ADAMTS-15 precursor                                                       |    |
| 32  | <b>NSGS</b> CL <u>CL</u> PR                            | 525.54        | 2      | 75.1  | Non-raft | 2              | 0   | 2        | 0   | 2              | 0   | 1        | 0   | 7                       | 0                       | 7                        | 0                        |               |             | H       | ADCY3       | IPI00028513 | Adenylate cyclase type 3                                          | 46/48                                                                     |    |
| 33  | <b>CQ</b> PAPPIDEDLPEERPD                              | 1019.08       | 2      | 74.7  | Non-raft | 2              | 0   | 0        | 0   | 2              | 0   | 0        | 0   | 4                       | 0                       | 4                        | 0                        |               |             | H       | ADORA1      | IPI00026872 | Adenosine A1 receptor                                             | 309                                                                       |    |
| 34  | AAGTAVGA <u>CA</u> SGGGPIGGGAR                         | 426.13        | 4      | 46.0  | Non-raft | 1              | 0   | 0        | 0   | 0              | 0   | 0        | 0   | 1                       | 0                       | 1                        | 0                        |               |             |         |             | AGER        | IPI00654858                                                       | Receptor for advanced glycosylation end-products deletion exon2-6 variant | 10 |



| No. | Sequence                              | Precursor m/z | Charge | Score | Fraction | Replicate      |     |          |     |                |     |          |     | Total EXP Each Fraction | Total CON Each Fraction | Total EXP Both Fractions | Total CON Both Fractions | EXP/CON Ratio | Ln(EXP/CON) | P-value         | Gene Symbol                                                                                                                               | Acc.Number                                                                   | Description                                                                  | Site |
|-----|---------------------------------------|---------------|--------|-------|----------|----------------|-----|----------|-----|----------------|-----|----------|-----|-------------------------|-------------------------|--------------------------|--------------------------|---------------|-------------|-----------------|-------------------------------------------------------------------------------------------------------------------------------------------|------------------------------------------------------------------------------|------------------------------------------------------------------------------|------|
|     |                                       |               |        |       |          | 1st Biological |     |          |     | 2nd Biological |     |          |     |                         |                         |                          |                          |               |             |                 |                                                                                                                                           |                                                                              |                                                                              |      |
|     |                                       |               |        |       |          | 1st Tech       |     | 2nd Tech |     | 1st Tech       |     | 2nd Tech |     |                         |                         |                          |                          |               |             |                 |                                                                                                                                           |                                                                              |                                                                              |      |
|     |                                       |               |        |       |          | EXP            | CON | EXP      | CON | EXP            | CON | EXP      | CON |                         |                         |                          |                          |               |             |                 |                                                                                                                                           |                                                                              |                                                                              |      |
| 35  | GPFVEAEPDVLDLECPDAK                   | 1015.99       | 2      | 50.1  | Non-raft | 1              | 0   | 0        | 0   | 0              | 0   | 0        | 1   | 0                       | 1                       | 0                        |                          | AHNAK         | IPI00555610 | 313 kDa protein | 1686                                                                                                                                      |                                                                              |                                                                              |      |
| 36  | SSGCVDNLPGVNVKLTGTGQISGPEIK           | 870.75        | 3      | 47.1  | Non-raft | 1              | 0   | 0        | 0   | 0              | 0   | 0        | 1   | 0                       | 4                       | 0                        |                          | H             | AHNAK       | IPI00555610     | 313 kDa protein                                                                                                                           | 2572                                                                         |                                                                              |      |
|     |                                       | 870.72        | 3      | 66.1  | Raft     | 1              | 0   | 0        | 0   | 2              | 0   | 0        | 3   | 0                       |                         |                          |                          | AHNAK         | IPI00555610 | 313 kDa protein |                                                                                                                                           |                                                                              |                                                                              |      |
| 37  | MEVLGHFGQSGNGYLELALPSARGVSVCLR        | 1060.16       | 3      | 47.0  | Non-raft | 1              | 0   | 0        | 0   | 0              | 0   | 0        | 1   | 0                       | 1                       | 0                        |                          |               | AKAP13      | IPI00386928     | CDNA FLJ11952 fis, clone HEMBB1000831, weakly similar to Homo sapiens breast cancer nuclear receptor-binding auxiliary protein (BRX) mRNA | 28                                                                           |                                                                              |      |
| 38  | FMNSGQTCVAPDYILCDPSIQNQIVEKLLK        | 1086.69       | 3      | 43.7  | Raft     | 0              | 0   | 0        | 1   | 0              | 0   | 0        | 0   | 1                       | 0                       | 1                        |                          |               | ALDH3A1     | IPI00296183     | Aldehyde dehydrogenase, dimeric NADP-preferring                                                                                           |                                                                              |                                                                              |      |
| 39  | YASICQQNGIVPIVEPEILPDGDHDLK           | 989.32        | 3      | 48.8  | Non-raft | 1              | 0   | 0        | 0   | 0              | 0   | 0        | 1   | 0                       | 1                       | 0                        |                          |               | ALDOC       | IPI00418262     | Fructose-bisphosphate aldolase C                                                                                                          | 178                                                                          |                                                                              |      |
| 40  | YYHVFREGELEGAQR                       | 611.04        | 3      | 47.3  | Non-raft | 0              | 0   | 0        | 1   | 0              | 0   | 0        | 0   | 1                       | 0                       | 1                        |                          |               | ALKBH8      | IPI00154533     | IMP dehydrogenase/GMP reductase family protein                                                                                            |                                                                              |                                                                              |      |
| 41  | MAKMPSGCGESSAGNR                      | 407.04        | 4      | 45.4  | Raft     | 0              | 0   | 0        | 1   | 0              | 0   | 0        | 0   | 1                       | 0                       | 1                        |                          |               | ALOX12      | IPI00782956     | 22 kDa protein                                                                                                                            |                                                                              |                                                                              |      |
| 42  | QNIDVFAQDMCRGDAEDYAISSHLLTK           | 993.35        | 3      | 46.4  | Non-raft | 0              | 0   | 1        | 0   | 0              | 0   | 0        | 1   | 0                       | 1                       | 0                        |                          |               | ANKRD20A1   | IPI00020265     | Ankyrin repeat domain-containing protein 20A1                                                                                             | 231                                                                          |                                                                              |      |
| 43  | SSSKPSCSLASGLK                        | 451.41        | 3      | 46.1  | Raft     | 0              | 0   | 1        | 0   | 0              | 0   | 0        | 1   | 0                       | 1                       | 0                        |                          |               | ANKRD34C    | IPI00741635     | PREDICTED: similar to cytosolic phosphoprotein DP58 isoform 2                                                                             | 485                                                                          |                                                                              |      |
| 44  | AQQPAASSTCGQPPATGSEQTGPHIR            | 669.96        | 4      | 52.2  | Raft     | 0              | 0   | 1        | 0   | 0              | 0   | 0        | 1   | 0                       | 1                       | 0                        |                          |               | ANKRD6      | IPI00032135     | Isoform 1 of Ankyrin repeat domain-containing protein 6                                                                                   | 607                                                                          |                                                                              |      |
| 45  | CSDNTEVEVSNLENKQPVESTSAK              | 870.30        | 3      | 44.8  | Raft     | 0              | 0   | 1        | 0   | 0              | 0   | 0        | 1   | 0                       | 1                       | 0                        |                          |               | ANLN        | IPI00032958     | Isoform 2 of Actin-binding protein anillin                                                                                                | 71                                                                           |                                                                              |      |
| 46  | SCGEQNPELLPK                          | 657.95        | 2      | 56.0  | Raft     | 2              | 0   | 1        | 0   | 0              | 0   | 0        | 3   | 0                       | 3                       | 0                        |                          | H             | ANLN        | IPI00032958     | Isoform 2 of Actin-binding protein anillin                                                                                                | 309                                                                          |                                                                              |      |
| 47  | MFCGDYVVGTFIPAPNFNPIMDAQMLGGALQGFCDK  | 1050.34       | 4      | 48.0  | Raft     | 0              | 0   | 1        | 0   | 0              | 0   | 0        | 1   | 0                       | 1                       | 0                        |                          |               | ANXA10      | IPI00296528     | Annexin A10                                                                                                                               | 35                                                                           |                                                                              |      |
| 48  | GLGTDEDSLIEIICSR                      | 861.05        | 2      | 72.4  | Non-raft | 0              | 1   | 1        | 2   | 0              | 0   | 0        | 1   | 3                       | 2                       | 8                        | 0.25                     | -1.386        | 0.999       | ANXA2P2         | IPI00334627                                                                                                                               | Similar to annexin A2 isoform 1                                              |                                                                              |      |
|     |                                       | 861.21        | 2      | 72.3  | Raft     | 0              | 2   | 0        | 2   | 1              | 0   | 0        | 1   | 5                       |                         |                          |                          |               | ANXA2P2     | IPI00334627     | Similar to annexin A2 isoform 1                                                                                                           |                                                                              |                                                                              |      |
| 49  | STVHEILCKLSLEGDHSTPPSAYGSVK           | 967.26        | 3      | 104.9 | Non-raft | 2              | 3   | 5        | 4   | 4              | 5   | 3        | 3   | 14                      | 15                      | 33                       | 24                       | 1.38          | 0.318       | 0.297           | ANXA2P2                                                                                                                                   | IPI00334627                                                                  | Similar to annexin A2 isoform 1                                              |      |
|     |                                       | 966.81        | 3      | 111.0 | Raft     | 4              | 2   | 5        | 4   | 6              | 1   | 4        | 2   | 19                      | 9                       |                          |                          |               |             | ANXA2P2         | IPI00334627                                                                                                                               | Similar to annexin A2 isoform 1                                              |                                                                              |      |
| 50  | MCFSATTDLGRGAVGNVSVLGR                | 564.28        | 4      | 52.3  | Raft     | 0              | 0   | 0        | 1   | 0              | 0   | 0        | 0   | 1                       | 0                       | 1                        |                          |               | AP3S1       | IPI00014624     | Adapter-related protein complex 3 sigma 1 subunit                                                                                         |                                                                              |                                                                              |      |
| 51  | MSATWCSPEQGGMQGPQREVGGNSAASGPASPIR    | 1150.41       | 3      | 47.1  | Raft     | 0              | 0   | 0        | 0   | 0              | 0   | 1        | 0   | 1                       | 0                       | 1                        | 0                        |               |             | APLN            | IPI00419611                                                                                                                               | Apelin, AGTRL1 ligand                                                        | 6                                                                            |      |
| 52  | CCALGRGTAWAACPGGACGLMGEADPSPPHCQQGQGK | 1027.27       | 4      | 45.1  | Raft     | 0              | 0   | 0        | 1   | 0              | 0   | 0        | 0   | 1                       | 0                       | 1                        |                          |               | ARHGAP27    | IPI00795597     | 7 kDa protein                                                                                                                             |                                                                              |                                                                              |      |
| 53  | GCGAFCHDDCIGPSKLCVSLVVR               | 684.25        | 4      | 46.0  | Raft     | 0              | 0   | 0        | 0   | 0              | 1   | 0        | 0   | 1                       | 0                       | 1                        |                          |               | ASXL2       | IPI00384569     | Hypothetical protein KIAA1685                                                                                                             |                                                                              |                                                                              |      |
| 54  | MDCSLVR                               | 433.33        | 2      | 57.4  | Non-raft | 0              | 0   | 0        | 0   | 0              | 0   | 2        | 0   | 2                       | 0                       | 0                        |                          | M             | ATP11A      | IPI00255653     | Probable phospholipid-transporting ATPase IH                                                                                              | 3                                                                            |                                                                              |      |
| 55  | YCAGEENWVDSR                          | 678.99        | 2      | 62.6  | Non-raft | 3              | 0   | 2        | 0   | 3              | 0   | 2        | 0   | 10                      | 0                       | 14                       | 0                        |               | H           | ATP11A          | IPI00255653                                                                                                                               | Probable phospholipid-transporting ATPase IH                                 | 14                                                                           |      |
|     |                                       | 715.10        | 2      | 84.6  | Raft     | 2              | 0   | 2        | 0   | 0              | 0   | 0        | 4   | 0                       |                         |                          |                          |               | ATP11A      | IPI00255653     | Probable phospholipid-transporting ATPase IH                                                                                              |                                                                              |                                                                              |      |
| 56  | AAAAVGNVAVPCGARGVVRPDGQPKPGQPQR       | 1078.46       | 3      | 45.1  | Non-raft | 1              | 0   | 0        | 0   | 0              | 0   | 0        | 1   | 0                       | 1                       | 0                        |                          |               | ATP13A1     | IPI00034277     | Isoform A of Probable cation-transporting ATPase 13A1                                                                                     | 18                                                                           |                                                                              |      |
| 57  | IISANGCKVDNSSLTGESEPQTR               | 803.03        | 3      | 75.9  | Non-raft | 2              | 1   | 4        | 2   | 2              | 2   | 1        | 2   | 9                       | 7                       | 16                       | 10                       | 1.60          | 0.470       | 0.198           | ATP1A1                                                                                                                                    | IPI00006482                                                                  | Isoform Long of Sodium/potassium-transporting ATPase alpha-1 chain precursor |      |
|     |                                       | 803.03        | 3      | 85.0  | Raft     | 1              | 2   | 2        | 1   | 2              | 0   | 2        | 0   | 7                       | 3                       |                          |                          |               |             | ATP1A1          | IPI00006482                                                                                                                               | Isoform Long of Sodium/potassium-transporting ATPase alpha-1 chain precursor |                                                                              |      |
| 58  | LIIVEGCQR                             | 515.61        | 2      | 52.8  | Non-raft | 1              | 0   | 1        | 0   | 0              | 0   | 0        | 2   | 0                       | 2                       | 0                        |                          | M             | ATP1A1      | IPI00006482     | Isoform Long of Sodium/potassium-transporting ATPase alpha-1 chain precursor                                                              | 705                                                                          |                                                                              |      |
| 59  | NIAFFSTNCVEGTAR                       | 815.66        | 2      | 87.1  | Non-raft | 2              | 1   | 2        | 2   | 2              | 0   | 1        | 0   | 7                       | 3                       | 7                        | 3                        | 2.33          | 0.847       | 0.052           | ATP1A1                                                                                                                                    | IPI00006482                                                                  | Isoform Long of Sodium/potassium-transporting ATPase alpha-1 chain precursor | 249  |
| 60  | NLEAVEITLGTSTICSDKTGTLTQNR            | 914.46        | 3      | 64.9  | Non-raft | 2              | 0   | 2        | 0   | 1              | 0   | 0        | 5   | 0                       | 7                       | 0                        |                          | H             | ATP1A1      | IPI00006482     | Isoform Long of Sodium/potassium-transporting ATPase alpha-1 chain precursor                                                              | 374                                                                          |                                                                              |      |
|     |                                       |               |        |       |          |                |     |          |     |                |     |          | 0   | 0                       |                         |                          |                          |               |             | ATP1A2          | IPI00003021                                                                                                                               | Sodium/potassium-transporting ATPase alpha-1 chain precursor                 | 372                                                                          |      |
|     |                                       | 914.43        | 3      | 52.9  | Raft     | 1              | 0   | 0        | 0   | 0              | 0   | 1        | 0   | 2                       | 0                       |                          |                          |               |             | ATP1A1          | IPI00006482                                                                                                                               | Isoform Long of Sodium/potassium-transporting ATPase alpha-1 chain precursor |                                                                              |      |
|     |                                       |               |        |       |          |                |     |          |     |                |     |          | 0   | 0                       |                         |                          |                          |               |             | ATP1A2          | IPI00003021                                                                                                                               | Sodium/potassium-transporting ATPase alpha-2 chain precursor                 |                                                                              |      |
| 61  | NKILIFGLEETALAAFLSYCPGMGVALR          | 1038.65       | 3      | 46.9  | Raft     | 0              | 0   | 0        | 0   | 0              | 0   | 1        | 0   | 1                       | 0                       | 1                        | 0                        |               |             | ATP1A2          | IPI00003021                                                                                                                               | Sodium/potassium-transporting ATPase alpha-2 chain precursor                 | 958                                                                          |      |
| 62  | GAPESVIERCSSVR                        | 373.15        | 4      | 47.8  | Non-raft | 0              | 0   | 0        | 0   | 0              | 1   | 0        | 0   | 0                       | 1                       | 0                        | 1                        |               |             | ATP2A3          | IPI00004092                                                                                                                               | Isoform SERCA3B of Sarcoplasmic/endoplasmic reticulum calcium ATPase 3       |                                                                              |      |
| 63  | ILAAQGCQKVDNSSLTGESEPQTR              | 802.78        | 3      | 104.8 | Non-raft | 0              | 1   | 0        | 0   | 0              | 0   | 0        | 0   | 1                       | 0                       | 1                        |                          |               |             | ATP4A           | IPI00218919                                                                                                                               | Potassium-transporting ATPase alpha chain 1                                  |                                                                              |      |
| 64  | AGCCWEVLR                             | 469.63        | 2      | 58.1  | Non-raft | 2              | 0   | 0        | 0   | 0              | 0   | 0        | 2   | 0                       | 2                       | 0                        |                          | M             | ATP9A       | IPI00024368     | Isoform Long of Probable phospholipid-transporting ATPase IIA                                                                             | 24/25                                                                        |                                                                              |      |

| No. | Sequence                                                               | Precursor m/z | Charge | Score | Fraction | Replicate      |     |          |     |                |     |          |     | Total EXP Each Fraction | Total CON Each Fraction | Total EXP Both Fractions | Total CON Both Fractions | EXP/CON Ratio | Ln(EXP/CON) | P-value                                                                           | Gene Symbol                                                                     | Acc.Number | Description | Site |
|-----|------------------------------------------------------------------------|---------------|--------|-------|----------|----------------|-----|----------|-----|----------------|-----|----------|-----|-------------------------|-------------------------|--------------------------|--------------------------|---------------|-------------|-----------------------------------------------------------------------------------|---------------------------------------------------------------------------------|------------|-------------|------|
|     |                                                                        |               |        |       |          | 1st Biological |     |          |     | 2nd Biological |     |          |     |                         |                         |                          |                          |               |             |                                                                                   |                                                                                 |            |             |      |
|     |                                                                        |               |        |       |          | 1st Tech       |     | 2nd Tech |     | 1st Tech       |     | 2nd Tech |     |                         |                         |                          |                          |               |             |                                                                                   |                                                                                 |            |             |      |
|     |                                                                        |               |        |       |          | EXP            | CON | EXP      | CON | EXP            | CON | EXP      | CON |                         |                         |                          |                          |               |             |                                                                                   |                                                                                 |            |             |      |
| 65  | LRSPPPA <b>C</b> ASGAGPAGGVSLLLPR                                      | 561.89        | 4      | 53.2  | Non-raft | 0              | 0   | 0        | 0   | 0              | 0   | 1        | 0   | 1                       | 0                       |                          |                          | B3GALNT2      | IP100744286 | Isoform 2 of UDP-GalNAc:beta-1,3-N-acetylgalactosaminyltransferase 2              | 30                                                                              |            |             |      |
| 66  | SVEDVRPHHTDANNQSA <b>C</b> FEAPDQK                                     | 932.77        | 3      | 53.4  | Raft     | 0              | 0   | 0        | 0   | 0              | 0   | 1        | 0   | 1                       | 0                       |                          |                          | BAT2D1        | IP100083708 | HBxAg transactivated protein 2                                                    | 897                                                                             |            |             |      |
| 67  | LNVFAPKPEATEVSPNKGTLVSMEDSAQEIAT <b>C</b> NSR                          | 1247.33       | 3      | 71.5  | Non-raft | 0              | 1   | 0        | 0   | 0              | 0   | 0        | 0   | 0                       | 1                       |                          |                          | BCAM          | IP100002406 | Lutheran blood group glycoprotein precursor                                       |                                                                                 |            |             |      |
| 68  | SSEHINEGETAMLV <b>C</b> K                                              | 874.64        | 2      | 78.7  | Non-raft | 2              | 2   | 2        | 2   | 1              | 0   | 2        | 1   | 7                       | 5                       | 1.13                     | 0.118                    | 0.454         | BSG         | IP100019906                                                                       | Isoform 2 of Basigin precursor                                                  |            |             |      |
|     |                                                                        | 874.67        | 2      | 67.0  | Raft     | 1              | 0   | 1        | 1   | 0              | 2   | 0        | 0   | 2                       | 3                       |                          |                          | BSG           | IP100019906 | Isoform 2 of Basigin precursor                                                    |                                                                                 |            |             |      |
| 69  | SAASSVSFSFPGGGGGGAAAAAA <b>C</b> R                                     | 550.13        | 4      | 50.0  | Raft     | 1              | 0   | 0        | 0   | 0              | 0   | 0        | 0   | 1                       | 0                       |                          |                          | C11orf61      | IP100439946 | c11orf61 protein                                                                  | 99                                                                              |            |             |      |
| 70  | ML <b>C</b> TAAYRSLPFYIK                                               | 449.60        | 4      | 48.6  | Non-raft | 0              | 0   | 1        | 0   | 0              | 0   | 0        | 0   | 1                       | 0                       |                          |                          | C12orf65      | IP100794143 | Hypothetical short protein                                                        | 15                                                                              |            |             |      |
| 71  | <b>A</b> TSVL <b>C</b> CLR                                             | 504.58        | 2      | 78.8  | Non-raft | 2              | 0   | 2        | 0   | 2              | 0   | 3        | 0   | 9                       | 0                       |                          |                          | H             | C13orf1     | IP100030959                                                                       | 24 kDa protein                                                                  | 7/8        |             |      |
|     |                                                                        | 504.35        | 2      | 69.5  | Raft     | 1              | 0   | 0        | 0   | 2              | 0   | 0        | 0   | 3                       | 0                       |                          |                          | C13orf1       | IP100030959 | 24 kDa protein                                                                    |                                                                                 |            |             |      |
| 72  | SRFPY <b>C</b> VVWTPIPVLTFWFFPIIHMGI <b>C</b> TSTGVIR                  | 1000.07       | 4      | 45.1  | Non-raft | 0              | 0   | 0        | 0   | 0              | 0   | 1        | 0   | 1                       | 0                       |                          |                          | C1orf160      | IP100030236 | Isoform 1 of Uncharacterized protein C1orf160                                     | 55                                                                              |            |             |      |
| 73  | IDL <b>C</b> LSSEGSEVILATSSDEK                                         | 549.98        | 4      | 45.4  | Non-raft | 0              | 0   | 0        | 1   | 0              | 0   | 0        | 0   | 0                       | 1                       |                          |                          | C1orf41       | IP100098827 | Placental protein 25                                                              |                                                                                 |            |             |      |
| 74  | ALVLD <b>C</b> HYPEDEVQGEDEAESDIFSIR                                   | 1027.36       | 3      | 48.6  | Non-raft | 0              | 1   | 0        | 1   | 0              | 0   | 0        | 0   | 0                       | 2                       |                          |                          | C1QBP         | IP100014230 | Complement component 1 Q subcomponent-binding protein, mitochondrial precursor    |                                                                                 |            |             |      |
| 75  | <b>C</b> QAGLGSQSPVSSGR                                                | 444.84        | 3      | 63.5  | Non-raft | 0              | 0   | 0        | 0   | 0              | 0   | 1        | 0   | 1                       | 0                       |                          |                          | C20orf81      | IP100098823 | Tissue plasminogen activator (Fragment)                                           |                                                                                 |            |             |      |
| 76  | TLIKEIQSPLSSI <b>C</b> DGSIADAEPTQPASLPR                               | 1151.36       | 3      | 45.5  | Non-raft | 0              | 0   | 1        | 0   | 0              | 0   | 0        | 0   | 1                       | 0                       |                          |                          | C2orf44       | IP100018786 | CDNA: FLJ21945 fis, clone HEP04702                                                | 507                                                                             |            |             |      |
| 77  | VVSVLPRALS <b>C</b> SPVPHLHR                                           | 728.33        | 3      | 50.0  | Non-raft | 1              | 0   | 0        | 0   | 0              | 0   | 0        | 0   | 1                       | 0                       |                          |                          | C5orf34       | IP100374273 | CDNA FLJ32363 fis, clone PUAEN1000081                                             | 304                                                                             |            |             |      |
| 78  | <b>V</b> AAQAFREGENTQVAEPEA <b>C</b> DQMYESLAR                         | 1048.57       | 3      | 50.1  | Non-raft | 0              | 0   | 2        | 0   | 0              | 0   | 0        | 0   | 2                       | 0                       |                          |                          | M             | C6orf125    | IP100031617                                                                       | Protein C6orf125                                                                | 53         |             |      |
| 79  | RTFPNIQ <b>L</b> CFMLTTH                                               | 575.06        | 3      | 47.3  | Raft     | 0              | 0   | 0        | 0   | 0              | 1   | 0        | 0   | 0                       | 1                       |                          |                          | C7orf34       | IP100064738 | Isoform 1 of Protein c7orf34 precursor                                            |                                                                                 |            |             |      |
| 80  | AGIF <b>L</b> LEMAGGQASVVIIGSAGVL <b>G</b> CR                          | 1048.57       | 3      | 50.1  | Non-raft | 1              | 0   | 0        | 0   | 0              | 0   | 0        | 0   | 1                       | 0                       |                          |                          | CAMK2G        | IP100555954 | Calcium/calmodulin-dependent protein kinase II gamma isoform 6 variant (Fragment) | 5                                                                               |            |             |      |
| 81  | <b>M</b> FSC <b>V</b> KPYEQNYSALRR                                     | 750.85        | 3      | 47.5  | Non-raft | 0              | 0   | 0        | 0   | 0              | 0   | 1        | 0   | 1                       | 0                       |                          |                          | H             | CAPN5       | IP100643994                                                                       | CDNA FLJ46245 fis, clone TESTI4020596, highly similar to Homo sapiens calpain 5 | 44         |             |      |
|     |                                                                        | 750.93        | 3      | 76.3  | Raft     | 3              | 0   | 2        | 0   | 2              | 0   | 0        | 0   | 7                       | 0                       |                          |                          |               | CAPN5       | IP100643994                                                                       | CDNA FLJ46245 fis, clone TESTI4020596, highly similar to Homo sapiens calpain 5 |            |             |      |
| 82  | <b>C</b> FSSVSLQLSQD                                                   | 658.01        | 2      | 77.5  | Raft     | 2              | 0   | 1        | 0   | 2              | 0   | 2        | 0   | 7                       | 0                       |                          |                          | H             | CAV2        | IP100019870                                                                       | Isoform Alpha of Caveolin-2                                                     | 151        |             |      |
| 83  | <b>S</b> VTDVIIAP <b>L</b> CTSVGR                                      | 815.73        | 2      | 45.5  | Non-raft | 1              | 0   | 0        | 0   | 0              | 0   | 0        | 0   | 1                       | 0                       |                          |                          | M             | CAV2        | IP100019870                                                                       | Isoform Alpha of Caveolin-2                                                     | 145        |             |      |
|     |                                                                        | 816.14        | 2      | 53.6  | Raft     | 0              | 0   | 1        | 0   | 0              | 0   | 0        | 0   | 1                       | 0                       |                          |                          |               | CAV2        | IP100019870                                                                       | Isoform Alpha of Caveolin-2                                                     |            |             |      |
| 84  | <b>A</b> NCEFSPVSGDK <b>P</b> CCR                                      | 919.70        | 2      | 73.8  | Raft     | 2              | 0   | 0        | 0   | 0              | 0   | 0        | 0   | 2                       | 0                       |                          |                          | M             | CD38        | IP100006071                                                                       | Isoform 1 of ADP-ribosyl cyclase 1                                              | 15/16      |             |      |
| 85  | MPEEGSG <b>C</b> SVR                                                   | 576.55        | 2      | 63.6  | Non-raft | 0              | 0   | 0        | 0   | 1              | 0   | 0        | 0   | 1                       | 0                       |                          |                          |               | CD70        | IP100031713                                                                       | Tumor necrosis factor ligand superfamily member 7                               | 8          |             |      |
| 86  | <b>C</b> NPGFSSFSEIITPTTET <b>C</b> DDINE <b>C</b> ATPSKVS <b>C</b> GK | 1353.92       | 3      | 56.2  | Non-raft | 0              | 0   | 0        | 1   | 0              | 0   | 0        | 0   | 0                       | 1                       |                          |                          |               | CD97        | IP100299412                                                                       | Isoform 2 of CD97 antigen precursor                                             |            |             |      |
| 87  | <b>C</b> NPGFSSFSEIITPTTET <b>C</b> DDINE <b>C</b> ATPSKVS <b>C</b> GK | 1354.00       | 3      | 73.5  | Non-raft | 0              | 0   | 0        | 1   | 0              | 0   | 0        | 0   | 0                       | 1                       |                          |                          |               | CD97        | IP100299412                                                                       | Isoform 2 of CD97 antigen precursor                                             |            |             |      |
| 88  | <b>W</b> ACL <b>V</b> AGGSKYSEFTSTTSGTGHNQTR                           | 950.09        | 3      | 74.6  | Non-raft | 1              | 0   | 2        | 0   | 0              | 0   | 0        | 0   | 3                       | 0                       |                          |                          | H             | CD97        | IP100299412                                                                       | Isoform 2 of CD97 antigen precursor                                             | 709        |             |      |
| 89  | LFQKQLQM <b>C</b> QSPGGAGGTVLGEAPDVL <b>S</b> MLGADK                   | 895.40        | 4      | 45.4  | Raft     | 0              | 1   | 0        | 0   | 0              | 0   | 0        | 0   | 0                       | 1                       |                          |                          |               | CDAN1       | IP100217439                                                                       | Isoform 1 of codanin-1                                                          |            |             |      |
| 90  | DSSSLSS <b>C</b> TSGILEER                                              | 418.88        | 4      | 44.1  | Raft     | 0              | 0   | 0        | 0   | 0              | 1   | 0        | 0   | 0                       | 1                       |                          |                          |               | CDC42EP4    | IP100015894                                                                       | cdc42 effector protein 4                                                        |            |             |      |
| 91  | <b>L</b> G <b>C</b> C <b>V</b> VEKPQPK                                 | 713.55        | 2      | 66.0  | Non-raft | 3              | 0   | 2        | 0   | 3              | 0   | 3        | 0   | 11                      | 0                       |                          |                          | H             | CDC42SE1    | IP100024972                                                                       | CDC42 small effector 1                                                          | 10         |             |      |
| 92  | <b>L</b> G <b>C</b> C <b>V</b> VEKPQPK                                 | 713.62        | 2      | 74.3  | Non-raft | 5              | 0   | 2        | 0   | 3              | 0   | 1        | 0   | 11                      | 0                       |                          |                          | H             | CDC42SE1    | IP100024972                                                                       | CDC42 small effector 1                                                          | 11         |             |      |
| 93  | <b>L</b> G <b>C</b> C <b>V</b> VEKPQPK                                 | 650.96        | 2      | 59.6  | Non-raft | 4              | 0   | 2        | 0   | 5              | 0   | 5        | 0   | 16                      | 0                       |                          |                          | H             | CDC42SE1    | IP100024972                                                                       | CDC42 small effector 1                                                          | 10/11      |             |      |
|     | SEFWHLG <b>C</b> C <b>V</b> VEKPQPK                                    | 720.31        | 3      | 66.5  | Raft     | 0              | 0   | 0        | 0   | 2              | 0   | 0        | 0   | 2                       | 0                       |                          |                          |               | CDC42SE1    | IP100024972                                                                       | CDC42 small effector 1                                                          | 10/11      |             |      |
| 94  | QRLMMLLATSGA <b>L</b> GLLAVA <sup>AAAA</sup> AAGANPAQR                 | 1056.87       | 3      | 43.5  | Raft     | 0              | 0   | 0        | 0   | 0              | 0   | 1        | 0   | 1                       | 0                       |                          |                          |               | CDH5        | IP100012792                                                                       | cadherin-5 precursor                                                            | 14         |             |      |
| 95  | MEAGGATGALGV <b>G</b> CK                                               | 447.13        | 3      | 44.4  | Non-raft | 0              | 0   | 1        | 0   | 0              | 0   | 0        | 0   | 1                       | 0                       |                          |                          |               | CDK3        | IP100023503                                                                       | Cell division protein kinase 3                                                  | 14         |             |      |
| 96  | <b>S</b> SSSSSSSSSSSS <b>C</b> SHSR                                    | 496.03        | 4      | 45.8  | Non-raft | 0              | 0   | 1        | 0   | 0              | 1   | 0        | 0   | 1                       | 1                       | 1.00                     | 0.000                    | 0.551         | CHD9        | IP100383105                                                                       | Isoform 1 of Chromodomai-helicase-DNA-binding protein 9                         |            |             |      |
| 97  | MAAEATAVAGSAGV <b>G</b> CLAK                                           | 444.90        | 4      | 55.7  | Raft     | 0              | 0   | 1        | 0   | 0              | 0   | 0        | 0   | 1                       | 0                       |                          |                          |               | CHKB        | IP100376947                                                                       | choline/ethanolamine kinase isoform b                                           | 17         |             |      |
| 98  | <b>S</b> SSSSASAAAAAASSAS <b>C</b> SR                                  | 1016.79       | 2      | 174.6 | Non-raft | 3              | 0   | 2        | 0   | 0              | 0   | 0        | 0   | 5                       | 0                       |                          |                          | H             | CKAP4       | IP100141318                                                                       | Isoform 1 of Cytoskeleton-associated protein 4                                  | 100        |             |      |
|     |                                                                        | 1017.10       | 2      | 182.1 | Raft     | 6              | 0   | 6        | 0   | 5              | 0   | 8        | 0   | 25                      | 0                       |                          |                          |               | CKAP4       | IP100141318                                                                       | Isoform 1 of cytoskeleton-associated protein 4                                  |            |             |      |
| 99  | ARLVLTSGIVFVIGVLTLPV <b>C</b> WTAHAIR                                  | 1107.74       | 3      | 44.1  | Non-raft | 0              | 0   | 0        | 0   | 1              | 0   | 0        | 0   | 1                       | 0                       |                          |                          |               | CLDN6       | IP100011084                                                                       | Claudin-6                                                                       | 137        |             |      |
| 100 | <b>L</b> C <b>V</b> WVPLLALGVGSGGGGDSRQR                               | 615.15        | 4      | 47.2  | Non-raft | 0              | 0   | 1        | 0   | 0              | 0   | 0        | 0   | 1                       | 0                       |                          |                          |               | CLSTN2      | IP100005491                                                                       | Calsyntenin-2 precursor                                                         | 7          |             |      |
| 101 | KFPVPGHVIVESGNHSFVGYINS <b>C</b> CNIYR                                 | 1137.37       | 3      | 46.9  | Raft     | 0              | 0   | 0        | 0   | 0              | 0   | 1        | 0   | 1                       | 0                       |                          |                          |               | CNBD1       | IP100167918                                                                       | cDNA FLJ35802 fis, clone TESTI2005948                                           | 367        |             |      |
| 102 | LGTDK <b>C</b> DNSSMSLQMGYTQGANQSGQVFLGR                               | 1118.02       | 3      | 94.0  | Non-raft | 2              | 0   | 0        | 2   | 1              | 2   | 0        | 1   | 3                       | 5                       | 0.86                     | -0.154                   | 0.673         | CNN2        | IP100015262                                                                       | Calponin-2                                                                      |            |             |      |
|     |                                                                        | 1118.60       | 3      | 102.0 | Raft     | 2              | 1   | 1        | 1   | 0              | 0   | 0        | 0   | 3                       | 2                       |                          |                          |               | CNN2        | IP100015262                                                                       | calponin-2                                                                      |            |             |      |
| 103 | <b>K</b> CEPIIMTVPR                                                    | 643.99        | 2      | 66.3  | Raft     | 2              | 2   | 2        | 0   | 2              | 0   | 1        | 0   | 7                       | 2                       | 3.50                     | 1.253                    | 0.007         | CORO1C      | IP100008453                                                                       | coronin-1c                                                                      | 396        |             |      |
| 104 | <b>S</b> CTVEAVR                                                       | 433.30        | 2      | 44.1  | Non-raft | 0              | 0   | 1        | 0   | 0              | 0   | 0        | 0   | 1                       | 0                       |                          |                          |               | CROT        | IP100292763                                                                       | Peroxisomal carnitine O-octanoyltransferase                                     | 458        |             |      |
| 105 | GLESTTLADKDGEI <b>V</b> CK                                             | 922.02        | 2      | 58.0  | Non-raft | 0              | 1   | 0        | 0   | 0              | 0   | 0        | 0   | 0                       | 1                       |                          |                          |               | CSRPI       | IP100442073                                                                       | Cysteine and glycine-rich protein 1                                             |            |             |      |

| No. | Sequence                                         | Precursor m/z | Charge | Score | Fraction | Replicate      |     |          |     |                |     |          |     | Total EXP Each Fraction | Total CON Each Fraction | Total EXP Both Fractions | Total CON Both Fractions | EXP/CON Ratio | Ln(EXP/CON) | P-value     | Gene Symbol                                                                                         | Acc.Number                                                                                                   | Description                                                                             | Site |
|-----|--------------------------------------------------|---------------|--------|-------|----------|----------------|-----|----------|-----|----------------|-----|----------|-----|-------------------------|-------------------------|--------------------------|--------------------------|---------------|-------------|-------------|-----------------------------------------------------------------------------------------------------|--------------------------------------------------------------------------------------------------------------|-----------------------------------------------------------------------------------------|------|
|     |                                                  |               |        |       |          | 1st Biological |     |          |     | 2nd Biological |     |          |     |                         |                         |                          |                          |               |             |             |                                                                                                     |                                                                                                              |                                                                                         |      |
|     |                                                  |               |        |       |          | 1st Tech       |     | 2nd Tech |     | 1st Tech       |     | 2nd Tech |     |                         |                         |                          |                          |               |             |             |                                                                                                     |                                                                                                              |                                                                                         |      |
|     |                                                  |               |        |       |          | EXP            | CON | EXP      | CON | EXP            | CON | EXP      | CON |                         |                         |                          |                          |               |             |             |                                                                                                     |                                                                                                              |                                                                                         |      |
| 106 | MMCGPSATQPTAETAETQHIADQVR                        | 1278.82       | 2      | 83.5  | Non-raft | 0              | 0   | 2        | 0   | 0              | 0   | 0        | 2   | 0                       | 2                       | 0                        |                          | M             | CSTB        | IPI00021828 | Cystatin B                                                                                          | 3                                                                                                            |                                                                                         |      |
| 107 | CIVHSPNTNPGFMTCSDDFR                             | 563.97        | 4      | 44.5  | Raft     | 0              | 0   | 1        | 0   | 0              | 0   | 0        | 1   | 0                       | 1                       | 0                        |                          |               | CSTF1       | IPI00011528 | cleavage stimulation factor 50 kDa subunit                                                          | 415                                                                                                          |                                                                                         |      |
| 108 | IGSVLAVFEAAASAQSAGASQSRVASGGCVRPARPER            | 1206.21       | 3      | 44.6  | Non-raft | 0              | 0   | 0        | 0   | 0              | 0   | 1        | 0   | 1                       | 0                       | 1                        |                          |               | CTDP1       | IPI00410256 | Isoform 1 of RNA polymerase II subunit A C-terminal domain phosphatase                              |                                                                                                              |                                                                                         |      |
| 109 | MSASQLEALCPQVINAALALAAKPOSK                      | 918.87        | 3      | 47.3  | Raft     | 0              | 0   | 1        | 0   | 0              | 0   | 0        | 1   | 0                       | 1                       | 0                        |                          |               | CTNNA1      | IPI00215948 | Isoform 1 of catenin alpha-1                                                                        | 461                                                                                                          |                                                                                         |      |
| 110 | YQEAAPNVANNTGPHAASCFCGAK                         | 1159.80       | 2      | 113.9 | Non-raft | 7              | 0   | 4        | 0   | 5              | 0   | 4        | 0   | 20                      | 0                       | 36                       | 0                        | H             | CTNND1      | IPI00182469 | Isoform 1AB of Catenin delta-1                                                                      | 618                                                                                                          |                                                                                         |      |
|     |                                                  | 1160.00       | 2      | 109.9 | Raft     | 4              | 0   | 4        | 0   | 4              | 0   | 4        | 0   | 16                      | 0                       |                          |                          |               | CTNND1      | IPI00182469 | Isoform 1AB of Catenin delta-1                                                                      |                                                                                                              |                                                                                         |      |
| 111 | CYVDGSEIIGSDFK                                   | 775.53        | 2      | 58.1  | Non-raft | 0              | 0   | 1        | 0   | 0              | 0   | 0        | 1   | 0                       | 1                       | 0                        |                          |               | CXADR       | IPI00019146 | Isoform 1 of Coxsackievirus and adenovirus receptor precursor                                       | 146                                                                                                          |                                                                                         |      |
| 112 | DTANHNAMSSVATDMSCDHLK                            | 798.33        | 3      | 50.9  | Non-raft | 0              | 0   | 0        | 0   | 0              | 0   | 1        | 0   | 1                       | 0                       | 1                        |                          |               | CXXC6       | IPI00303112 | CXXC-type zinc finger protein 6                                                                     |                                                                                                              |                                                                                         |      |
| 113 | CRLECGEGLRPLVDGTVTAAYCLLGGASPAAAGRP LR           | 1303.18       | 3      | 47.0  | Non-raft | 0              | 0   | 0        | 0   | 1              | 0   | 0        | 0   | 1                       | 0                       | 1                        | 0                        |               |             | CXYorf2     | IPI00303903                                                                                         | Chromosome X and Y open reading frame 2                                                                      | 22/29/40                                                                                |      |
| 114 | EEGPPATATAFLGGCGLSAPTGDYGFADGKPCVA GALTAVAGEEELR | 1209.61       | 4      | 50.7  | Non-raft | 0              | 0   | 0        | 0   | 0              | 0   | 1        | 0   | 1                       | 0                       | 1                        | 0                        |               |             | DCHS1       | IPI00064262                                                                                         | Protocadherin-16 precursor                                                                                   | 3153                                                                                    |      |
| 115 | LLATLGLGDVCTLSCVLCASSVLVERR                      | 730.32        | 4      | 51.8  | Non-raft | 0              | 0   | 0        | 0   | 0              | 0   | 1        | 0   | 1                       | 0                       | 1                        |                          |               | DCTN1       | IPI00555695 | Dynactin 1 isoform 1 variant (Fragment)                                                             |                                                                                                              |                                                                                         |      |
| 116 | LFQLQMCYEYLKIVNEIK                               | 529.10        | 4      | 51.4  | Raft     | 0              | 0   | 0        | 0   | 0              | 1   | 0        | 0   | 1                       | 0                       | 1                        |                          |               | DDEF1       | IPI00376976 | Isoform 1 of 130 kDa phosphatidylinositol 4,5-biphosphate-dependent ARF1 GTPase- activating protein |                                                                                                              |                                                                                         |      |
| 117 | EILSRCCALEPSLHGACNIR                             | 729.03        | 3      | 46.3  | Raft     | 1              | 0   | 0        | 0   | 0              | 0   | 0        | 1   | 0                       | 1                       | 0                        |                          |               | DDO         | IPI00015389 | Isoform DDO-1 of D-aspartate oxidase                                                                | 258/259/269                                                                                                  |                                                                                         |      |
| 118 | VRPCVVYGGADIGQQIRDLE                             | 587.02        | 4      | 70.5  | Raft     | 2              | 0   | 1        | 0   | 1              | 0   | 0        | 4   | 0                       | 4                       | 0                        |                          | H             | DDX3X       | IPI00215637 | ATP-dependent RNA helicase DDX3X                                                                    | 298                                                                                                          |                                                                                         |      |
| 119 | QDLGGTCVNEGCIPTK                                 | 881.18        | 2      | 79.4  | Raft     | 0              | 1   | 0        | 0   | 1              | 0   | 1        | 1   | 2                       | 2                       | 2                        | 2                        | 1.00          | 0.000       | 0.551       | DERP12                                                                                              | IPI00382990                                                                                                  | DERP12                                                                                  |      |
| 120 | QDLGGTCVNEGCIPTK                                 | 880.66        | 2      | 52.1  | Raft     | 0              | 1   | 0        | 1   | 0              | 1   | 0        | 0   | 3                       | 0                       | 3                        |                          |               |             | DERP12      | IPI00382990                                                                                         | DERP12                                                                                                       |                                                                                         |      |
| 121 | QDLGGTCVNEGCIPTK                                 | 818.66        | 2      | 94.1  | Raft     | 0              | 0   | 0        | 0   | 1              | 0   | 1        | 0   | 2                       | 0                       | 2                        | 0                        |               | M           | DERP12      | IPI00382990                                                                                         | DERP12                                                                                                       | 45/50                                                                                   |      |
| 122 | NTPCSENKLDIQEK                                   | 810.05        | 2      | 44.6  | Raft     | 0              | 0   | 1        | 0   | 0              | 0   | 0        | 1   | 0                       | 1                       | 0                        |                          |               |             | DHX36       | IPI00027415                                                                                         | Isoform 1 of Probable ATP-dependent RNA helicase DHX36                                                       | 135                                                                                     |      |
| 123 | AAECNIVVTQPR                                     | 650.98        | 2      | 65.3  | Raft     | 1              | 1   | 2        | 2   | 2              | 0   | 1        | 0   | 6                       | 3                       | 6                        | 3                        | 2.00          | 0.693       | 0.095       | DHX9                                                                                                | IPI00844578                                                                                                  | ATP-dependent RNA helicase A                                                            | 438  |
| 124 | DKDDDDGGEDDDANCLICGDEYGPETR                      | 1019.59       | 3      | 75.0  | Raft     | 2              | 0   | 2        | 0   | 1              | 0   | 0        | 5   | 0                       | 5                       | 0                        |                          | H             | DHX9        | IPI00844578 | ATP-dependent RNA helicase A                                                                        | 608                                                                                                          |                                                                                         |      |
| 125 | DKDDDDGGEDDDANCLICGDEYGPETR                      | 1019.92       | 3      | 51.3  | Raft     | 1              | 0   | 0        | 0   | 0              | 1   | 1        | 0   | 2                       | 1                       | 2                        | 1                        | 2.00          | 0.693       | 0.095       | DHX9                                                                                                | IPI00844578                                                                                                  | ATP-dependent RNA helicase A                                                            | 612  |
| 126 | TGPLAATRGRHDCAR                                  | 476.10        | 3      | 46.2  | Non-raft | 0              | 1   | 0        | 0   | 0              | 0   | 0        | 0   | 0                       | 1                       | 0                        | 1                        |               |             | DIO1        | IPI00451418                                                                                         | Isoforms of Type I iodotyrosine deiodinase                                                                   |                                                                                         |      |
| 127 | VSMEQCQGGVEGQIPGR                                | 444.93        | 4      | 49.7  | Non-raft | 0              | 0   | 0        | 0   | 1              | 0   | 0        | 0   | 1                       | 0                       | 1                        | 0                        |               |             | DLGAP4      | IPI00445781                                                                                         | CDNA FLJ43393 fis, clone OCBBF2007610, highly similar to Rattus norvegicus PSD-95/SAP90-associated protein-4 | 232                                                                                     |      |
| 128 | TTQLGPGRGMQTEVVCDECPNVK                          | 936.47        | 3      | 48.1  | Non-raft | 0              | 1   | 0        | 0   | 0              | 0   | 0        | 0   | 0                       | 1                       | 0                        | 1                        |               |             | DNAJB11     | IPI00008454                                                                                         | DnaJ homolog subfamily B member 11 precursor                                                                 |                                                                                         |      |
| 129 | AITIANQTNCPLYITK                                 | 882.60        | 2      | 79.1  | Non-raft | 2              | 1   | 2        | 0   | 0              | 0   | 0        | 4   | 1                       | 4                       | 1                        | 4.00                     | 1.386         | 0.003       | DPYSL2      | IPI00257508                                                                                         | Dihydropyrimidinase-related protein 2                                                                        | 248                                                                                     |      |
| 130 | GLYDGPVCEVSVTPK                                  | 783.23        | 2      | 62.6  | Non-raft | 0              | 1   | 0        | 0   | 1              | 0   | 0        | 1   | 1                       | 1                       | 1                        | 1.00                     | 0.000         | 0.551       | DPYSL2      | IPI00257508                                                                                         | Dihydropyrimidinase-related protein 2                                                                        |                                                                                         |      |
| 131 | QKPATETSMNTASHSLCEQTMVNSENTYSSGSSFPV PK          | 1359.75       | 3      | 49.9  | Raft     | 1              | 0   | 0        | 0   | 0              | 0   | 0        | 1   | 0                       | 1                       | 0                        |                          |               |             | DSG2        | IPI00028931                                                                                         | desmoglein 2 preproprotein                                                                                   | 871                                                                                     |      |
| 132 | YPGTTRVAYLPDCPEGNK                               | 496.08        | 4      | 49.9  | Non-raft | 0              | 0   | 0        | 0   | 0              | 0   | 1        | 0   | 1                       | 0                       | 1                        |                          |               |             | DTX3        | IPI00148820                                                                                         | Isoform 2 of Protein dextex-3                                                                                |                                                                                         |      |
| 133 | CSGPLGIEGGIISNQITASSTHR                          | 809.61        | 3      | 99.1  | Raft     | 2              | 0   | 2        | 0   | 2              | 1   | 1        | 0   | 7                       | 1                       | 7                        | 1                        | 7.00          | 1.946       | 0.000       | EDIL3                                                                                               | IPI00306046                                                                                                  | Isoform 1 of EGF-like repeat and discoidin 1-like domain-containing protein 3 precursor | 158  |
| 134 | MQPPPSLCGRALVALVLAACGLSR                         | 784.98        | 3      | 44.4  | Non-raft | 0              | 0   | 0        | 1   | 0              | 0   | 0        | 0   | 1                       | 0                       | 1                        |                          |               |             | EDNRB       | IPI00029123                                                                                         | Isoform A of Endothelin B receptor precursor                                                                 |                                                                                         |      |
| 135 | SGDAIVDMVPGKPMCEVESFDYPLGR                       | 832.78        | 4      | 47.7  | Non-raft | 4              | 2   | 1        | 6   | 2              | 2   | 2        | 2   | 9                       | 12                      | 21                       | 17                       | 1.24          | 0.211       | 0.378       | EEF1A1                                                                                              | IPI00025447                                                                                                  | EEF1A1 protein                                                                          |      |
|     |                                                  | 980.58        | 3      | 64.0  | Raft     | 4              | 1   | 3        | 1   | 3              | 1   | 2        | 2   | 12                      | 5                       |                          |                          |               |             | EEF1A1      | IPI00025447                                                                                         | EEF1A1 protein                                                                                               |                                                                                         |      |
| 136 | SGDAIVEMVPGKPMCEVESFQYPLGR                       | 989.39        | 3      | 62.0  | Raft     | 1              | 2   | 2        | 1   | 0              | 0   | 1        | 0   | 4                       | 3                       | 4                        | 3                        | 1.33          | 0.288       | 0.320       | EEF1A2                                                                                              | IPI00014424                                                                                                  | Elongation factor 1-alpha 2                                                             |      |
| 137 | SSILLDVKPWDEDTMAKLEE_CVR                         | 932.10        | 3      | 73.4  | Raft     | 1              | 0   | 1        | 0   | 0              | 0   | 0        | 2   | 0                       | 2                       | 0                        |                          | M             | EEF1B2      | IPI00178440 | Elongation factor 1-beta                                                                            | 161                                                                                                          |                                                                                         |      |
| 138 | AAAPAPEEEMDECFQALAAEPK                           | 1150.75       | 2      | 61.4  | Non-raft | 0              | 3   | 2        | 2   | 0              | 1   | 1        | 0   | 3                       | 6                       | 19                       | 16                       | 1.19          | 0.172       | 0.410       | EEF1G                                                                                               | IPI00000875                                                                                                  | Elongation factor 1-gamma                                                               |      |
|     |                                                  | 1151.41       | 2      | 100.0 | Raft     | 5              | 4   | 3        | 4   | 4              | 1   | 4        | 1   | 16                      | 10                      |                          |                          |               |             | EEF1G       | IPI00000875                                                                                         | Elongation factor 1-gamma                                                                                    |                                                                                         |      |
| 139 | CELLYEGPPDDEAAMGK                                | 976.54        | 2      | 46.2  | Non-raft | 0              | 0   | 0        | 0   | 0              | 0   | 1        | 0   | 1                       | 0                       | 1                        | 0                        |               |             | EEF2        | IPI00186290                                                                                         | Elongation factor 2                                                                                          | 369                                                                                     |      |
| 140 | SDPVVSYRETVEESNVL_CLSK                           | 814.56        | 3      | 45.3  | Non-raft | 0              | 0   | 0        | 0   | 0              | 0   | 1        | 0   | 1                       | 0                       | 1                        | 0                        |               |             | EEF2        | IPI00186290                                                                                         | Elongation factor 2                                                                                          | 591                                                                                     |      |
| 141 | LFASIECEGQLFMTPTYDFILAVTTDEPKVAK                 | 870.69        | 4      | 55.9  | Raft     | 0              | 0   | 0        | 1   | 0              | 0   | 0        | 0   | 1                       | 0                       | 1                        |                          |               |             | EFHA2       | IPI00329209                                                                                         | EF-hand domain-containing family member A2                                                                   |                                                                                         |      |
| 142 | KPSIAAVVGSMDGHPSTRYCATVR                         | 605.73        | 4      | 46.0  | Raft     | 0              | 0   | 0        | 0   | 0              | 0   | 0        | 1   | 0                       | 1                       | 0                        | 1                        |               |             | EIF2C3      | IPI00030602                                                                                         | Eukaryotic translation initiation factor 2c 4                                                                |                                                                                         |      |
| 143 | SCGSSTPDEFFTDPITGK                               | 920.15        | 2      | 50.8  | Raft     | 1              | 0   | 1        | 0   | 0              | 0   | 2        | 0   | 4                       | 0                       | 4                        | 0                        |               | H           | EIF2S3      | IPI00297982                                                                                         | Eukaryotic translation initiation factor 2 subunit 3                                                         | 105                                                                                     |      |
| 144 | GMLLFLCTSMTWKLLK                                 | 476.11        | 4      | 45.8  | Raft     | 0              | 1   | 0        | 0   | 0              | 0   | 0        | 0   | 1                       | 0                       | 1                        | 0                        |               |             | EIF4G2      | IPI00654814                                                                                         | Hypothetical protein Nbla00315                                                                               |                                                                                         |      |
| 145 | CGGSPGAYGGGEACAGVKSSGSGR                         | 550.27        | 4      | 46.5  | Raft     | 0              | 0   | 0        | 0   | 1              | 0   | 0        | 0   | 1                       | 0                       | 1                        | 0                        |               |             | EIF6        | IPI00375391                                                                                         | integrin beta 4 binding protein isoform c                                                                    | 50                                                                                      |      |
| 146 | APGAASLLCAPDANCPPDGSQPAAGAGASK                   | 699.30        | 4      | 46.6  | Raft     | 0              | 0   | 1        | 0   | 0              | 0   | 0        | 0   | 1                       | 0                       | 1                        | 0                        |               |             | EN1         | IPI00016734                                                                                         | Homeobox protein engrailed-1                                                                                 | 171                                                                                     |      |

| No. | Sequence                                                          | Precursor m/z | Charge | Score | Fraction | Replicate      |     |          |     |                |     |          |     | Total EXP Each Fraction | Total CON Each Fraction | Total EXP Both Fractions | Total CON Both Fractions | EXP/CON Ratio | Ln(EXP/CON) | P-value | Gene Symbol | Acc.Number                        | Description                                      | Site      |
|-----|-------------------------------------------------------------------|---------------|--------|-------|----------|----------------|-----|----------|-----|----------------|-----|----------|-----|-------------------------|-------------------------|--------------------------|--------------------------|---------------|-------------|---------|-------------|-----------------------------------|--------------------------------------------------|-----------|
|     |                                                                   |               |        |       |          | 1st Biological |     |          |     | 2nd Biological |     |          |     |                         |                         |                          |                          |               |             |         |             |                                   |                                                  |           |
|     |                                                                   |               |        |       |          | 1st Tech       |     | 2nd Tech |     | 1st Tech       |     | 2nd Tech |     |                         |                         |                          |                          |               |             |         |             |                                   |                                                  |           |
|     |                                                                   |               |        |       |          | EXP            | CON | EXP      | CON | EXP            | CON | EXP      | CON |                         |                         |                          |                          |               |             |         |             |                                   |                                                  |           |
| 147 | I <u>C</u> CLHKPGGSLTGAKLQD <u>C</u> MSR                          | 798.58        | 3      | 45.3  | Raft     | 0              | 0   | 0        | 0   | 1              | 0   | 0        | 0   | 1                       | 0                       | 1                        | 0                        |               |             | EXOSC8  | IPI00552920 | Exosome complex exonuclease RRP43 | 233/234/251                                      |           |
| 148 | AVLT <u>C</u> SEQDQSPPEYTFWKDGIVMPTNPK                            | 1100.55       | 3      | 85.8  | Non-raft | 0              | 2   | 0        | 2   | 2              | 0   | 0        | 0   | 2                       | 4                       | 2                        | 4                        | 0.50          | -0.693      | 0.942   | F11R        | IPI00001754                       | Junctional adhesion molecule A precursor         |           |
| 149 | G <u>S</u> CARPFPPTVTK                                            | 441.09        | 3      | 44.9  | Raft     | 0              | 0   | 0        | 0   | 0              | 1   | 0        | 0   | 0                       | 1                       | 0                        | 1                        |               |             | FBN3    | IPI00438355 | Fibrillin-3 precursor             |                                                  |           |
| 150 | AAPAPGAGAASGGAG <u>C</u> SGGGAGAGAGSGSGAAGA GGRLPSR               | 1037.30       | 3      | 45.1  | Non-raft | 1              | 0   | 0        | 0   | 0              | 0   | 0        | 0   | 1                       | 0                       | 2                        | 0                        |               |             | M       | FBXO45      | IPI00174438                       | PREDICTED: similar to F-box protein 45 isoform 2 | 17        |
|     | MAAPAPGAGAASGGAG <u>C</u> SGGGAGAGAGSGSGAAG AGGRLPSR              | 1081.69       | 3      | 44.7  | Raft     | 0              | 0   | 0        | 0   | 1              | 0   | 0        | 0   | 1                       | 0                       |                          |                          |               |             |         | FBXO45      | IPI00174438                       | PREDICTED: similar to F-box protein 45 isoform 2 |           |
| 151 | <u>LDL</u> PNRPETSFLWFTNP <u>C</u> K                              | 760.70        | 3      | 87.5  | Non-raft | 2              | 0   | 3        | 0   | 4              | 0   | 2        | 0   | 11                      | 0                       | 19                       | 0                        |               |             | H       | FER1L3      | IPI00021048                       | Isoform 1 of Myoferlin                           | 2013      |
|     |                                                                   | 760.25        | 3      | 84.6  | Raft     | 2              | 0   | 3        | 0   | 1              | 0   | 2        | 0   | 8                       | 0                       |                          |                          |               |             |         | FER1L3      | IPI00021048                       | Isoform 1 of Myoferlin                           |           |
| 152 | SSLRAGGGGGGGGGGGGGGAPV <u>C</u> GASGL <u>C</u> K                  | 812.27        | 3      | 53.3  | Non-raft | 0              | 0   | 0        | 0   | 0              | 0   | 1        | 0   | 1                       | 0                       | 1                        | 0                        |               |             |         | FEZF2       | IPI00154618                       | FEZ family zinc finger 2                         | 121/127   |
| 153 | <u>CL</u> CVAFQLHLPLSQR                                           | 464.12        | 4      | 46.5  | Non-raft | 0              | 0   | 0        | 0   | 1              | 0   | 0        | 0   | 1                       | 0                       | 1                        | 0                        |               |             |         | FLJ31033    | IPI00853133                       | hypothetical protein LOC91351                    | 300       |
| 154 | VLP <u>CC</u> QAGLELLDSSLDPASASQAGIIGPR                           | 1024.29       | 3      | 44.1  | Raft     | 0              | 0   | 0        | 0   | 1              | 0   | 0        | 0   | 1                       | 0                       | 1                        | 0                        |               |             |         | FLJ31222    | IPI00788134                       | FLJ31222 protein                                 | 22/23     |
| 155 | TGRSVSA <u>CC</u> APRPTHSSATQASMLPAPT <u>AC</u> SRPV <u>C</u> CLR | 1064.89       | 4      | 71.3  | Non-raft | 0              | 0   | 0        | 0   | 0              | 0   | 1        | 0   | 1                       | 0                       | 1                        | 0                        |               |             |         | FLJ31568    | IPI00043300                       | CDNA FLJ31568 fis, clone NT2R12001595            | 97/98/125 |
| 156 | TTSPQQEILLQSLPEG <u>C</u> PGR                                     | 539.38        | 4      | 46.8  | Raft     | 0              | 1   | 0        | 0   | 0              | 0   | 0        | 0   | 0                       | 1                       | 0                        | 1                        |               |             |         | FLJ31713    | IPI00043522                       | cDNA FLJ31713 fis, clone NT2R12006487            |           |
| 157 | ALGALVDS <u>C</u> APGLCPDWSDWASKPVTNAR                            | 1081.76       | 3      | 47.5  | Raft     | 1              | 0   | 0        | 0   | 0              | 0   | 0        | 0   | 1                       | 0                       | 1                        | 0                        |               |             |         | FLNA        | IPI00302592                       | filamin 1                                        | 205       |
| 158 | AT <u>C</u> APQHGAAGPGPADASKVVAK                                  | 711.22        | 3      | 73.7  | Non-raft | 2              | 2   | 0        | 0   | 2              | 0   | 2        | 0   | 6                       | 2                       | 10                       | 6                        | 1.67          | 0.511       | 0.176   | FLNA        | IPI00302592                       | filamin 1                                        | 2535      |
|     |                                                                   | 711.06        | 3      | 75.2  | Raft     | 2              | 2   | 2        | 2   | 0              | 0   | 0        | 0   | 4                       | 4                       |                          |                          |               |             |         | FLNA        | IPI00302592                       | filamin 1                                        |           |
| 159 | <u>C</u> SGPLSPGMVR                                               | 580.56        | 2      | 61.4  | Non-raft | 2              | 0   | 1        | 0   | 1              | 0   | 0        | 0   | 4                       | 0                       | 7                        | 2                        | 3.50          | 1.253       | 0.007   | FLNA        | IPI00302592                       | filamin 1                                        | 1165      |
|     |                                                                   | 581.04        | 2      | 82.2  | Raft     | 1              | 1   | 2        | 1   | 0              | 0   | 0        | 0   | 3                       | 2                       |                          |                          |               |             |         | FLNA        | IPI00302592                       | filamin 1                                        |           |
| 160 | <u>C</u> SYQPTMEGVHTVHVTFAGVPIPR                                  | 876.57        | 3      | 65.1  | Non-raft | 2              | 1   | 2        | 2   | 1              | 0   | 0        | 0   | 5                       | 3                       | 9                        | 5                        | 1.80          | 0.588       | 0.137   | FLNA        | IPI00302592                       | filamin 1                                        | 444       |
|     |                                                                   | 876.59        | 3      | 82.9  | Raft     | 2              | 1   | 2        | 1   | 0              | 0   | 0        | 0   | 4                       | 2                       |                          |                          |               |             |         | FLNA        | IPI00302592                       | filamin 1                                        |           |
| 161 | IVGPSAAV <u>P</u> C <u>K</u>                                      | 798.37        | 3      | 98.6  | Non-raft | 2              | 4   | 4        | 2   | 2              | 2   | 2        | 2   | 10                      | 10                      | 22                       | 21                       | 1.05          | 0.047       | 0.510   | FLNA        | IPI00302592                       | filamin 1                                        |           |
|     | IVGPSAAV <u>P</u> C <u>K</u> VEPLGADNSVVR                         | 798.54        | 3      | 99.9  | Raft     | 6              | 4   | 4        | 3   | 1              | 2   | 1        | 2   | 12                      | 11                      |                          |                          |               |             |         | FLNA        | IPI00302592                       | filamin 1                                        |           |
| 162 | SPYTVTVGQA <u>C</u> NPS <u>A</u> C <u>R</u>                       | 940.04        | 2      | 86.4  | Non-raft | 2              | 0   | 0        | 0   | 0              | 0   | 0        | 0   | 2                       | 0                       | 5                        | 4                        | 1.25          | 0.223       | 0.369   | FLNA        | IPI00302592                       | filamin 1                                        |           |
|     |                                                                   | 940.61        | 2      | 114.0 | Raft     | 2              | 3   | 1        | 1   | 0              | 0   | 0        | 0   | 3                       | 4                       |                          |                          |               |             |         | FLNA        | IPI00302592                       | filamin 1                                        |           |
| 163 | SPYTVTVGQA <u>C</u> NPS <u>A</u> C <u>R</u>                       | 940.46        | 2      | 107.8 | Non-raft | 2              | 2   | 2        | 2   | 2              | 2   | 2        | 2   | 8                       | 8                       | 16                       | 13                       | 1.23          | 0.208       | 0.381   | FLNA        | IPI00302592                       | filamin 1                                        |           |
|     |                                                                   | 940.68        | 2      | 113.0 | Raft     | 4              | 2   | 4        | 3   | 0              | 0   | 0        | 0   | 8                       | 5                       |                          |                          |               |             |         | FLNA        | IPI00302592                       | filamin 1                                        |           |
| 164 | <u>SPY</u> TVTVGQA <u>C</u> NPS <u>A</u> C <u>R</u>               | 877.67        | 2      | 100.4 | Raft     | 2              | 0   | 2        | 0   | 0              | 0   | 0        | 0   | 4                       | 0                       | 4                        | 0                        |               |             | H       | FLNA        | IPI00302592                       | filamin 1                                        | 477/483   |
| 165 | SSFTV <u>D</u> C <u>S</u> K                                       | 487.73        | 2      | 59.7  | Raft     | 1              | 1   | 0        | 0   | 0              | 0   | 0        | 0   | 1                       | 1                       | 1                        | 1                        | 1.00          | 0.000       | 0.551   | FLNA        | IPI00302592                       | filamin 1                                        |           |
| 166 | VGSAADIPINISETDLSLLTATVPPSGREEP <u>CL</u> LK                      | 1236.40       | 3      | 102.1 | Raft     | 2              | 0   | 3        | 1   | 0              | 0   | 0        | 0   | 5                       | 1                       | 5                        | 1                        | 5.00          | 1.609       | 0.001   | FLNA        | IPI00302592                       | filamin 1                                        | 1989      |
| 167 | VHSPSGALEE <u>C</u> YVTEIQDKYAVR                                  | 880.63        | 3      | 60.2  | Non-raft | 0              | 0   | 0        | 0   | 0              | 0   | 1        | 0   | 0                       | 1                       | 4                        | 1                        | 4.00          | 1.386       | 0.003   | FLNA        | IPI00302592                       | filamin 1                                        | 2370      |
|     |                                                                   | 678.60        | 4      | 115.6 | Raft     | 2              | 0   | 2        | 0   | 0              | 0   | 0        | 0   | 4                       | 0                       |                          |                          |               |             |         | FLNA        | IPI00302592                       | filamin 1                                        |           |
| 168 | VQVQDNE <u>G</u> CPVEALVKDNGNGTYS <u>C</u> SYVPR                  | 1123.60       | 3      | 60.2  | Raft     | 1              | 0   | 0        | 0   | 0              | 0   | 0        | 0   | 1                       | 0                       | 1                        | 0                        |               |             |         | FLNA        | IPI00302592                       | filamin 1                                        | 777       |
| 169 | YGGQVPVPNPFPSKLQVEPAVDTSV <u>G</u> Q <u>C</u> YGPGEQGVFR          | 1327.44       | 3      | 100.5 | Non-raft | 1              | 0   | 2        | 0   | 1              | 0   | 0        | 0   | 4                       | 0                       | 8                        | 4                        | 2.00          | 0.693       | 0.095   | FLNA        | IPI00302592                       | filamin 1                                        | 1260      |
|     |                                                                   | 1327.85       | 3      | 160.1 | Raft     | 2              | 1   | 2        | 3   | 0              | 0   | 0        | 0   | 4                       | 4                       |                          |                          |               |             |         | FLNA        | IPI00302592                       | filamin 1                                        |           |
| 170 | <u>AG</u> SNMLLIGVHGPTT <u>P</u> CEEVSMK                          | 791.25        | 3      | 73.9  | Non-raft | 3              | 0   | 2        | 0   | 1              | 0   | 1        | 0   | 7                       | 0                       | 18                       | 1                        | 18.00         | 2.890       | 0.000   | FLNB        | IPI00289334                       | Isoform 1 of Filamin-B                           | 2556      |
|     |                                                                   | 791.82        | 3      | 96.1  | Raft     | 4              | 0   | 6        | 1   | 0              | 0   | 1        | 0   | 11                      | 1                       |                          |                          |               |             |         | FLNB        | IPI00289334                       | Isoform 1 of Filamin-B                           |           |
| 171 | AHIANPSGASTE <u>C</u> FVTDNADGTYQVEYTPFEK                         | 1155.26       | 3      | 80.2  | Non-raft | 2              | 0   | 2        | 0   | 0              | 0   | 0        | 0   | 4                       | 0                       | 8                        | 2                        | 4.00          | 1.386       | 0.003   | FLNB        | IPI00289334                       | Isoform 1 of Filamin-B                           | 1280      |
|     |                                                                   | 1155.23       | 3      | 109.8 | Raft     | 2              | 1   | 2        | 1   | 0              | 0   | 0        | 0   | 4                       | 2                       |                          |                          |               |             |         | FLNB        | IPI00289334                       | Isoform 1 of Filamin-B                           |           |
| 172 | APS VATVGS <u>C</u> DLNLKPIEINSSDMSAHTVSPSGR                      | 1185.74       | 3      | 99.2  | Raft     | 1              | 0   | 0        | 1   | 0              | 0   | 0        | 0   | 1                       | 1                       | 1                        | 1                        | 1.00          | 0.000       | 0.551   | FLNB        | IPI00289334                       | Isoform 1 of Filamin-B                           |           |
| 173 | <u>CL</u> ATGPGIASTVK                                             | 609.43        | 2      | 60.3  | Non-raft | 2              | 0   | 2        | 0   | 1              | 0   | 0        | 0   | 5                       | 0                       | 9                        | 2                        | 4.50          | 1.504       | 0.001   | FLNB        | IPI00289334                       | Isoform 1 of Filamin-B                           | 1617      |
|     |                                                                   | 610.12        | 2      | 79.3  | Raft     | 2              | 2   | 2        | 0   | 0              | 0   | 0        | 0   | 4                       | 2                       |                          |                          |               |             |         | FLNB        | IPI00289334                       | Isoform 1 of Filamin-B                           |           |
| 174 | DAGYGGISLAVEGSPKVDIQTEDLEDGT <u>C</u> K                           | 1023.76       | 3      | 58.9  | Raft     | 1              | 0   | 1        | 0   | 0              | 0   | 0        | 0   | 2                       | 0                       | 2                        | 0                        |               |             | M       | FLNB        | IPI00289334                       | Isoform 1 of Filamin-B                           | 2057      |
| 175 | GAGIGGLGITVEGPESKIN <u>C</u> R                                    | 706.54        | 3      | 49.2  | Raft     | 0              | 1   | 0        | 0   | 0              | 0   | 0        | 0   | 0                       | 1                       | 0                        | 1                        |               |             |         | FLNB        | IPI00289334                       | Isoform 1 of Filamin-B                           |           |
| 176 | GAGTGGGLTVEGP <u>C</u> EAK                                        | 809.68        | 2      | 89.6  | Raft     | 2              | 0   | 2        | 1   | 0              | 0   | 0        | 0   | 4                       | 1                       | 4                        | 1                        | 4.00          | 1.386       | 0.003   | FLNB        | IPI00289334                       | Isoform 1 of Filamin-B                           | 1081      |
| 177 | GLHVVEVTYDDVPINSPFKA <sup>AVTEG</sup> <u>C</u> QPSR               | 1119.17       | 3      | 43.4  | Raft     | 0              | 0   | 1        | 0   | 0              | 0   | 0        | 0   | 1                       | 0                       | 1                        | 0                        |               |             |         | FLNB        | IPI00289334                       | Isoform 1 of Filamin-B                           | 1326      |
| 178 | IEYNDQNDG <u>S</u> CDVK                                           | 800.46        | 2      | 52.4  | Raft     | 1              | 0   | 0        | 0   | 0              | 0   | 0        | 0   | 1                       | 0                       | 1                        | 0                        |               |             |         | FLNB        | IPI00289334                       | Isoform 1 of Filamin-B                           | 604       |
| 179 | SG <u>C</u> VNNLAFTVDPK                                           | 854.65        | 2      | 71.8  | Non-raft | 0              | 2   | 1        | 0   | 0              | 0   | 0        | 0   | 1                       | 2                       | 5                        | 6                        | 0.83          | -0.182      | 0.694   | FLNB        | IPI00289334                       | Isoform 1 of Filamin-B                           |           |
|     |                                                                   | 854.14        | 2      | 131.1 | Raft     | 2              | 2   | 2        | 2   | 0              | 0   | 0        | 0   | 4                       | 4                       |                          |                          |               |             |         | FLNB        | IPI00289334                       | Isoform 1 of Filamin-B                           |           |
| 180 | SPFVVQVGEA <u>C</u> NPNA <u>C</u> R                               | 959.77        | 2      | 64.6  | Non-raft | 1              | 0   | 0        | 0   | 0              | 0   | 0        | 0   | 1                       | 0                       | 5                        | 0                        |               |             | H       | FLNB        | IPI00289334                       | Isoform 1 of Filamin-B                           | 450       |
|     |                                                                   | 959.11        | 2      | 106.3 | Raft     | 2              | 0   | 2        | 0   | 0              | 0   | 0        | 0   | 4                       | 0                       |                          |                          |               |             |         | FLNB        | IPI00289334                       | Isoform 1 of Filamin-B                           |           |
| 181 | SPFVVQVGEA <u>C</u> NPNA <u>C</u> R                               | 958.65        | 2      | 62.9  | Non-raft | 1              | 0   | 1        | 0   | 1              | 0   | 0        | 0   | 3                       | 0                       | 7                        | 0                        |               |             | H       | FLNB        | IPI00289334                       | Isoform 1 of Filamin-B                           | 455       |

| No. | Sequence                              | Precursor m/z | Charge | Score | Fraction | Replicate      |     |          |     |                |     |          |     | Total EXP Each Fraction | Total CON Each Fraction | Total EXP Both Fractions | Total CON Both Fractions | EXP/CON Ratio | Ln(EXP/CON) | P-value     | Gene Symbol            | Acc.Number             | Description                                                                     | Site    |
|-----|---------------------------------------|---------------|--------|-------|----------|----------------|-----|----------|-----|----------------|-----|----------|-----|-------------------------|-------------------------|--------------------------|--------------------------|---------------|-------------|-------------|------------------------|------------------------|---------------------------------------------------------------------------------|---------|
|     |                                       |               |        |       |          | 1st Biological |     |          |     | 2nd Biological |     |          |     |                         |                         |                          |                          |               |             |             |                        |                        |                                                                                 |         |
|     |                                       |               |        |       |          | 1st Tech       |     | 2nd Tech |     | 1st Tech       |     | 2nd Tech |     |                         |                         |                          |                          |               |             |             |                        |                        |                                                                                 |         |
|     |                                       |               |        |       |          | EXP            | CON | EXP      | CON | EXP            | CON | EXP      | CON |                         |                         |                          |                          |               |             |             |                        |                        |                                                                                 |         |
|     |                                       | 959.17        | 2      | 130.1 | Raft     | 3              | 0   | 1        | 0   | 0              | 0   | 0        | 0   | 4                       | 0                       |                          |                          |               | FLNB        | IPI00289334 | Isoform 1 of Filamin-B |                        |                                                                                 |         |
| 182 | SSFLVDCSKAGSNMLLIGVHGPTTPCEEVSMK      | 1155.31       | 3      | 103.0 | Raft     | 3              | 0   | 2        | 0   | 0              | 0   | 0        | 0   | 5                       | 0                       | 5                        | 0                        |               | H           | FLNB        | IPI00289334            | Isoform 1 of Filamin-B | 2556                                                                            |         |
| 183 | SSTETCYSAIPK                          | 643.98        | 2      | 57.7  | Non-raft | 1              | 0   | 0        | 1   | 1              | 0   | 1        | 1   | 3                       | 2                       | 6                        | 5                        | 1.20          | 0.182       | 0.401       | FLNB                   | IPI00289334            | Isoform 1 of Filamin-B                                                          |         |
|     |                                       | 644.19        | 2      | 60.1  | Raft     | 1              | 1   | 1        | 2   | 0              | 0   | 1        | 0   | 3                       | 3                       |                          |                          |               |             | FLNB        | IPI00289334            | Isoform 1 of Filamin-B |                                                                                 |         |
| 184 | VAVTEGCOPSR                           | 573.84        | 2      | 53.0  | Raft     | 2              | 0   | 0        | 0   | 0              | 0   | 0        | 0   | 2                       | 0                       | 2                        | 0                        |               |             | M           | FLNB                   | IPI00289334            | Isoform 1 of Filamin-B                                                          | 1326    |
| 185 | VHSPSGAVEECHVSELEPKYAVR               | 880.63        | 3      | 60.2  | Non-raft | 2              | 0   | 3        | 2   | 0              | 1   | 2        | 1   | 7                       | 4                       | 10                       | 9                        | 1.11          | 0.105       | 0.464       | FLNB                   | IPI00289334            | Isoform 1 of Filamin-B                                                          |         |
|     |                                       | 660.68        | 4      | 64.4  | Raft     | 0              | 3   | 3        | 2   | 0              | 0   | 0        | 0   | 3                       | 5                       |                          |                          |               |             |             | FLNB                   | IPI00289334            | Isoform 1 of Filamin-B                                                          |         |
| 186 | VVPCLVTPVTGR                          | 936.57        | 2      | 49.7  | Non-raft | 1              | 0   | 0        | 1   | 0              | 0   | 0        | 0   | 1                       | 1                       | 6                        | 1                        | 6.00          | 1.792       | 0.000       | FLNB                   | IPI00289334            | Isoform 1 of Filamin-B                                                          | 991     |
|     |                                       | 620.58        | 2      | 52.7  | Raft     | 3              | 0   | 2        | 0   | 0              | 0   | 0        | 0   | 5                       | 0                       |                          |                          |               |             |             | FLNB                   | IPI00289334            | Isoform 1 of Filamin-B                                                          |         |
| 187 | MFFTCGPNEAMVVSGFQR                    | 1061.71       | 2      | 60.3  | Raft     | 1              | 0   | 0        | 0   | 0              | 0   | 0        | 0   | 1                       | 0                       | 1                        | 0                        |               |             |             | FLOT1                  | IPI00027438            | Flotillin-1                                                                     | 5       |
| 188 | MFFTCGPNEAMVVSGFQR                    | 1061.16       | 2      | 111.2 | Non-raft | 9              | 0   | 8        | 0   | 9              | 0   | 3        | 0   | 29                      | 0                       | 130                      | 1                        | #####         | 4.868       | 0.000       | FLOT1                  | IPI00027438            | Flotillin-1                                                                     | 17      |
|     |                                       | 1069.18       | 2      | 121.7 | Raft     | 29             | 0   | 24       | 0   | 26             | 1   | 22       | 0   | 101                     | 1                       |                          |                          |               |             |             | FLOT1                  | IPI00027438            | Flotillin-1                                                                     |         |
| 189 | MFFTCGPNEAMVVSGFQR                    | 998.67        | 2      | 64.2  | Non-raft | 2              | 0   | 0        | 0   | 0              | 0   | 0        | 0   | 2                       | 0                       | 15                       | 0                        |               |             | H           | FLOT1                  | IPI00027438            | Flotillin-1                                                                     | 5/17    |
|     |                                       | 998.67        | 2      | 131.0 | Raft     | 4              | 0   | 3        | 0   | 2              | 0   | 4        | 0   | 13                      | 0                       |                          |                          |               |             |             | FLOT1                  | IPI00027438            | Flotillin-1                                                                     |         |
| 190 | SPPVMVAGGRVFLPCLQIQQR                 | 799.90        | 3      | 110.6 | Non-raft | 8              | 0   | 7        | 0   | 5              | 0   | 3        | 0   | 23                      | 0                       | 63                       | 0                        |               |             | H           | FLOT1                  | IPI00027438            | Flotillin-1                                                                     | 34      |
|     |                                       | 799.37        | 3      | 123.2 | Raft     | 10             | 0   | 8        | 0   | 11             | 0   | 11       | 0   | 40                      | 0                       |                          |                          |               |             |             | FLOT1                  | IPI00027438            | Flotillin-1                                                                     |         |
| 191 | DVPKQMMQMFGLGALSLLVCLPIYCR            | 769.49        | 4      | 52.3  | Non-raft | 0              | 0   | 0        | 0   | 0              | 0   | 1        | 0   | 1                       | 0                       | 1                        | 0                        |               |             |             | FMR1NB                 | IPI00166099            | Fragile X mental retardation 1 neighbor                                         | 199/204 |
| 192 | RCMVPGESFMQADVINGSVSYQHGR             | 697.09        | 4      | 51.7  | Non-raft | 0              | 0   | 0        | 0   | 0              | 0   | 0        | 1   | 0                       | 1                       | 0                        | 1                        |               |             |             | FREM3                  | IPI00095592            | PREDICTED: similar to FRAS1-related extracellular matrix protein 3 precursor    |         |
| 193 | VGKDELFALEQSCAQVVLQAANER              | 880.63        | 3      | 60.2  | Non-raft | 1              | 0   | 0        | 0   | 0              | 0   | 0        | 0   | 1                       | 0                       | 1                        | 1                        | 1.00          | 0.000       | 0.551       | FSCN1                  | IPI00163187            | Fascin                                                                          |         |
|     |                                       | 874.02        | 3      | 57.6  | Raft     | 0              | 1   | 0        | 0   | 0              | 0   | 0        | 0   | 0                       | 1                       |                          |                          |               |             |             | FSCN1                  | IPI00163187            | Fascin                                                                          |         |
| 194 | KVPGVTAIELGEETCTFR                    | 651.04        | 3      | 63.7  | Raft     | 0              | 1   | 0        | 1   | 1              | 0   | 0        | 0   | 1                       | 2                       | 1                        | 2                        | 0.50          | -0.693      | 0.942       | FXR2                   | IPI00016250            | Fragile X mental retardation syndrome-related protein 2                         |         |
| 195 | SEATTAPRPPFAKPTLPGGPAPASGGECFAGGPFVCK | 1281.02       | 3      | 45.9  | Non-raft | 0              | 1   | 0        | 0   | 0              | 0   | 0        | 0   | 0                       | 1                       | 0                        | 1                        |               |             |             | FZD5                   | IPI00298743            | Frizzled-5 precursor                                                            |         |
| 196 | VMSQNFNTCHTK                          | 705.59        | 2      | 47.5  | Raft     | 0              | 0   | 2        | 0   | 0              | 0   | 0        | 0   | 2                       | 0                       | 2                        | 0                        |               |             | M           | G3BP1                  | IPI00012442            | Ras-GTPase-activating protein-binding protein 1                                 | 73      |
| 197 | DSGAALGLGIALHSPCYAQR                  | 700.80        | 3      | 110.2 | Non-raft | 6              | 0   | 5        | 0   | 6              | 0   | 4        | 0   | 21                      | 0                       | 21                       | 0                        |               |             | H           | G6PC3                  | IPI00031052            | glucose-6-phosphatase catalytic subunit 3                                       | 269     |
| 198 | IISNASCTTNCLAPLAK                     | 923.57        | 2      | 95.9  | Non-raft | 5              | 1   | 3        | 1   | 1              | 2   | 1        | 1   | 10                      | 5                       | 10                       | 5                        | 2.00          | 0.693       | 0.095       | GAPDH                  | IPI00219018            | Glyceraldehyde-3-phosphate dehydrogenase                                        | 152     |
| 199 | IISNASCTTNCLAPLAK                     | 923.52        | 2      | 72.8  | Non-raft | 3              | 0   | 0        | 0   | 0              | 0   | 1        | 1   | 4                       | 1                       | 4                        | 1                        | 4.00          | 1.386       | 0.003       | GAPDH                  | IPI00219018            | Glyceraldehyde-3-phosphate dehydrogenase                                        | 156     |
| 200 | IISNASCTTNCLAPLAK                     | 860.60        | 2      | 85.0  | Non-raft | 2              | 0   | 0        | 0   | 0              | 0   | 0        | 0   | 2                       | 0                       | 2                        | 0                        |               |             | M           | GAPDH                  | IPI00219018            | Glyceraldehyde-3-phosphate dehydrogenase                                        | 152/156 |
| 201 | SCYEDGWLIK                            | 608.02        | 2      | 50.3  | Raft     | 1              | 1   | 0        | 1   | 0              | 0   | 0        | 0   | 1                       | 2                       | 1                        | 2                        | 0.50          | -0.693      | 0.942       | GCSH                   | IPI00011604            | Glycine cleavage system H protein, mitochondrial precursor                      |         |
| 202 | CGIFAYLNYHVR                          | 777.17        | 2      | 61.8  | Non-raft | 2              | 0   | 2        | 0   | 0              | 0   | 0        | 0   | 4                       | 0                       | 4                        | 0                        |               |             | H           | GFPT1                  | IPI00217952            | Isoform 1 of Glucosamine--fructose-6-phosphate aminotransferase [isomerizing] 1 | 2       |
| 203 | AKPYEGSILEADCDLIPAASEK                | 811.92        | 3      | 54.4  | Raft     | 1              | 0   | 2        | 0   | 0              | 1   | 0        | 0   | 3                       | 1                       | 3                        | 1                        | 3.00          | 1.099       | 0.016       | GLUD1                  | IPI00016801            | Glutamate dehydrogenase 1, mitochondrial precursor                              | 436     |
| 204 | TLESMMACCLSDVEKESK                    | 1086.37       | 2      | 93.5  | Non-raft | 4              | 0   | 4        | 0   | 2              | 0   | 3        | 0   | 13                      | 0                       | 13                       | 0                        |               |             | H           | GNA11                  | IPI00305551            | Guanine nucleotide-binding protein subunit alpha-11                             | 9       |
| 205 | TLESMMACCLSDVEKESK                    | 1086.35       | 2      | 50.6  | Raft     | 0              | 0   | 1        | 0   | 0              | 0   | 0        | 0   | 1                       | 0                       | 1                        | 0                        |               |             |             | GNA11                  | IPI00305551            | Guanine nucleotide-binding protein subunit alpha-11                             | 10      |
| 206 | TLESMMACCLSDVEKESK                    | 1024.24       | 2      | 107.9 | Non-raft | 14             | 0   | 10       | 0   | 8              | 0   | 7        | 0   | 39                      | 0                       | 46                       | 0                        |               |             | H           | GNA11                  | IPI00305551            | Guanine nucleotide-binding protein subunit alpha-11                             | 9/10    |
|     |                                       | 669.27        | 3      | 56.7  | Raft     | 4              | 0   | 3        | 0   | 0              | 0   | 0        | 0   | 7                       | 0                       |                          |                          |               |             |             | GNA11                  | IPI00305551            | Guanine nucleotide-binding protein subunit alpha-11                             |         |
| 207 | CLLPAEAGGAR                           | 529.45        | 2      | 53.6  | Non-raft | 1              | 0   | 0        | 0   | 1              | 0   | 0        | 0   | 2                       | 0                       | 2                        | 0                        |               |             | M           | GNA12                  | IPI00328744            | Guanine nucleotide-binding protein alpha-12 subunit                             | 11      |
| 208 | SVLSVCFPGCLLTSGEAEQQR                 | 1175.93       | 2      | 97.5  | Non-raft | 3              | 0   | 1        | 0   | 3              | 0   | 2        | 0   | 9                       | 0                       | 9                        | 0                        |               |             | H           | GNA13                  | IPI00290928            | Guanine nucleotide-binding protein alpha-13 subunit                             | 14      |
| 209 | SVLSVCFPGCLLTSGEAEQQR                 | 1113.54       | 2      | 114.5 | Non-raft | 3              | 0   | 4        | 0   | 6              | 0   | 7        | 0   | 20                      | 0                       | 30                       | 0                        |               |             | H           | GNA13                  | IPI00290928            | Guanine nucleotide-binding protein alpha-13 subunit                             | 14/18   |
|     |                                       | 1112.71       | 2      | 70.2  | Raft     | 2              | 0   | 3        | 0   | 3              | 0   | 2        | 0   | 10                      | 0                       |                          |                          |               |             |             | GNA13                  | IPI00290928            | Guanine nucleotide-binding protein alpha-13 subunit                             |         |
| 210 | TLESIMACCLSEEAKEAR                    | 1076.50       | 2      | 67.7  | Non-raft | 2              | 0   | 1        | 0   | 0              | 0   | 0        | 0   | 3                       | 0                       | 3                        | 0                        |               |             | H           | GNAQ                   | IPI00288947            | Guanine nucleotide binding protein                                              | 9       |
| 211 | TLESIMACCLSEEAKEAR                    | 1076.50       | 2      | 99.9  | Non-raft | 2              | 0   | 2        | 0   | 1              | 0   | 1        | 0   | 6                       | 0                       | 8                        | 0                        |               |             | H           | GNAQ                   | IPI00288947            | Guanine nucleotide binding protein                                              | 10      |
|     |                                       | 1076.11       | 2      | 82.2  | Raft     | 1              | 0   | 1        | 0   | 0              | 0   | 0        | 0   | 2                       | 0                       |                          |                          |               |             |             | GNAQ                   | IPI00288947            | Guanine nucleotide binding protein                                              |         |
| 212 | TLESIMACCLSEEAKEAR                    | 1013.50       | 2      | 106.5 | Non-raft | 14             | 0   | 11       | 0   | 11             | 0   | 9        | 0   | 45                      | 0                       | 60                       | 0                        |               |             | H           | GNAQ                   | IPI00288947            | Guanine nucleotide binding protein                                              | 9/10    |
|     |                                       | 1014.28       | 2      | 105.0 | Raft     | 3              | 0   | 3        | 0   | 4              | 0   | 5        | 0   | 15                      | 0                       |                          |                          |               |             |             | GNAQ                   | IPI00288947            | Guanine nucleotide binding protein                                              |         |
| 213 | ELAGHTGYLSCCR                         | 768.24        | 2      | 44.9  | Non-raft | 0              | 0   | 1        | 0   | 0              | 0   | 0        | 0   | 1                       | 0                       | 3                        | 2                        | 1.50          | 0.405       | 0.238       | GNB1                   | IPI00026268            | Guanine nucleotide-binding protein G(I)/G(S)/G(T) subunit beta 1                | 148     |
|     |                                       | 768.36        | 2      | 55.2  | Raft     | 0              | 1   | 2        | 1   | 0              | 0   | 0        | 0   | 2                       | 2                       |                          |                          |               |             |             | GNB1                   | IPI00026268            | Guanine nucleotide-binding protein G(I)/G(S)/G(T) subunit beta 1                |         |
| 214 | ELAGHTGYLSCCR                         | 768.20        | 2      | 45.2  | Raft     | 0              | 0   | 0        | 2   | 0              | 0   | 0        | 0   | 0                       | 2                       | 0                        | 2                        |               |             |             | GNB1                   | IPI00026268            | Guanine nucleotide-binding protein G(I)/G(S)/G(T) subunit beta 1                |         |
| 215 | KACGDSTLTQITAGLDPVGR                  | 668.93        | 3      | 51.3  | Raft     | 0              | 1   | 0        | 0   | 0              | 0   | 0        | 0   | 0                       | 1                       | 0                        | 1                        |               |             |             | GNB2                   | IPI00003348            | Guanine nucleotide-binding protein G(I)/G(S)/G(T) subunit beta 2                |         |
| 216 | EKECCMSMR                             | 372.16        | 3      | 48.3  | Non-raft | 0              | 0   | 0        | 1   | 0              | 0   | 0        | 0   | 0                       | 1                       | 0                        | 1                        |               |             |             | GOLGA2                 | IPI00413895            | Golgi autoantigen, golgin subfamily A member 2                                  |         |
| 217 | ATTVPDGCRRNGLK                        | 688.07        | 2      | 46.8  | Non-raft | 0              | 0   | 0        | 0   | 1              | 0   | 0        | 0   | 1                       | 0                       | 9                        | 1                        | 9.00          | 2.197       | 0.000       | GPC5A                  | IPI00022624            | Retinoic acid-induced protein 3                                                 | 9       |

| No. | Sequence                                                                        | Precursor m/z | Charge | Score | Fraction | Replicate      |     |          |     |                |     |          |     | Total EXP Each Fraction | Total CON Each Fraction | Total EXP Both Fractions | Total CON Both Fractions | EXP/CON Ratio | Ln(EXP/CON) | P-value      | Gene Symbol                     | Acc.Number                                                         | Description                                                                | Site    |
|-----|---------------------------------------------------------------------------------|---------------|--------|-------|----------|----------------|-----|----------|-----|----------------|-----|----------|-----|-------------------------|-------------------------|--------------------------|--------------------------|---------------|-------------|--------------|---------------------------------|--------------------------------------------------------------------|----------------------------------------------------------------------------|---------|
|     |                                                                                 |               |        |       |          | 1st Biological |     |          |     | 2nd Biological |     |          |     |                         |                         |                          |                          |               |             |              |                                 |                                                                    |                                                                            |         |
|     |                                                                                 |               |        |       |          | 1st Tech       |     | 2nd Tech |     | 1st Tech       |     | 2nd Tech |     |                         |                         |                          |                          |               |             |              |                                 |                                                                    |                                                                            |         |
|     |                                                                                 |               |        |       |          | EXP            | CON | EXP      | CON | EXP            | CON | EXP      | CON |                         |                         |                          |                          |               |             |              |                                 |                                                                    |                                                                            |         |
|     |                                                                                 | 687.64        | 2      | 52.8  | Raft     |                |     |          |     |                |     |          |     | 8                       | 1                       |                          |                          |               | GPRC5A      | IPI00022624  | Retinoic acid-induced protein 3 |                                                                    |                                                                            |         |
| 218 | QRNPMDYVPEDAFC <sup>CP</sup> QPLVK                                              | 793.89        | 3      | 49.5  | Non-raft | 1              | 0   | 0        | 0   | 0              | 0   | 0        | 0   | 1                       | 0                       | 11                       | 0                        |               | H           | GPRC5A       | IPI00022624                     | Retinoic acid-induced protein 3                                    | 284                                                                        |         |
|     |                                                                                 | 793.58        | 3      | 83.2  | Raft     | 3              | 0   | 3        | 0   | 2              | 0   | 2        | 0   | 10                      | 0                       |                          |                          |               |             | GPRC5A       | IPI00022624                     | Retinoic acid-induced protein 3                                    |                                                                            |         |
| 219 | LDPT <sup>CL</sup> GMADPASVGNVETVPATK                                           | 796.19        | 3      | 60.5  | Non-raft | 0              | 0   | 0        | 1   | 0              | 0   | 0        | 0   | 0                       | 1                       | 0                        | 1                        |               |             |              | GPRIN1                          | IPI00332155                                                        | Isoform 1 of G protein-regulated inducer of neurite outgrowth 1            |         |
| 220 | EAGGL <sup>CI</sup> AQSVRIQER                                                   | 457.88        | 4      | 48.8  | Raft     | 0              | 0   | 0        | 0   | 0              | 1   | 0        | 0   | 0                       | 1                       | 0                        | 1                        |               |             |              | GRM7                            | IPI00292323                                                        | Isoform 5 of Metabotropic glutamate receptor 7 precursor                   |         |
| 221 | GMFLM <sup>TVSS</sup> CVSK                                                      | 370.84        | 4      | 44.8  | Raft     | 0              | 0   | 0        | 1   | 0              | 0   | 0        | 0   | 0                       | 1                       | 0                        | 1                        |               |             | hCG_174512_1 | IPI00788017                     | PREDICTED: similar to notch1-induced protein                       |                                                                            |         |
| 222 | MSVGS <sup>LCD</sup> QVIYPDSVEGMRR                                              | 586.79        | 4      | 47.4  | Raft     | 0              | 1   | 0        | 0   | 0              | 0   | 0        | 0   | 0                       | 1                       | 0                        | 1                        |               |             | hCG_204277_9 | IPI00735964                     | PREDICTED: similar to ATP-binding cassette sub-family D member 1   |                                                                            |         |
| 223 | SSFPT <sup>CA</sup> AHHGQERR                                                    | 404.10        | 4      | 47.6  | Raft     | 0              | 0   | 1        | 0   | 0              | 0   | 0        | 0   | 1                       | 0                       | 1                        | 0                        |               |             | HECW2        | IPI00017163                     | HECT, c2 and WW domain containing E3 ubiquitin protein ligase 2    | 224                                                                        |         |
| 224 | MYG <sup>CDL</sup> GPDGR                                                        | 593.03        | 2      | 71.4  | Non-raft | 1              | 0   | 1        | 0   | 2              | 0   | 1        | 0   | 5                       | 0                       | 5                        | 0                        |               | H           | HLA-B        | IPI00471955                     | HLA class I histocompatibility antigen, B-50 alpha chain precursor | 125                                                                        |         |
|     |                                                                                 |               |        |       |          |                |     |          |     |                |     |          |     | 0                       | 0                       |                          |                          |               |             | HLA-C        | IPI00473131                     | HLA class I histocompatibility antigen, Cw-6 alpha chain precursor | 125                                                                        |         |
| 225 | GCGVVKFESPEVAER                                                                 | 536.23        | 3      | 70.5  | Raft     | 3              | 1   | 2        | 2   | 2              | 0   | 2        | 1   | 9                       | 4                       | 9                        | 4                        | 2.25          | 0.811       | 0.060        | HNRPM                           | IPI00171903                                                        | heterogeneous nuclear ribonucleoprotein M isoform a                        | 694     |
| 226 | LKNSPGTAEGCGGGGGGGGGGGSGGGGGGGGGGGGGDK                                          | 974.24        | 3      | 46.9  | Raft     | 0              | 0   | 0        | 0   | 0              | 0   | 1        | 0   | 1                       | 0                       | 1                        | 0                        |               |             |              | HOXB3                           | IPI00027259                                                        | Homeobox protein Hox-B3                                                    | 153     |
| 227 | AAGDGGNGPGAGIGAAATGTGGSSEPSA <sup>CD</sup> DHPHG <sup>CSL</sup> KEEEK           | 1319.41       | 3      | 47.7  | Raft     | 1              | 0   | 0        | 0   | 0              | 0   | 0        | 0   | 1                       | 0                       | 1                        | 0                        |               |             |              | HOXD9                           | IPI00292734                                                        | Homeobox protein Hox-D9                                                    | 245/263 |
| 228 | LLQ <sup>CD</sup> PSSASQF                                                       | 648.40        | 2      | 60.5  | Non-raft | 2              | 0   | 0        | 0   | 0              | 0   | 0        | 0   | 2                       | 0                       | 5                        | 0                        |               | H           | HPCA         | IPI00219103                     | Neuron-specific calcium-binding protein hippocalin                 | 185                                                                        |         |
|     |                                                                                 | 648.62        | 2      | 75.9  | Raft     | 1              | 0   | 2        | 0   | 0              | 0   | 0        | 0   | 3                       | 0                       |                          |                          |               |             | HPCA         | IPI00219103                     | Neuron-specific calcium-binding protein hippocalin                 |                                                                            |         |
| 229 | LPLALPPASQGC <sup>SS</sup> GGGGGGGGSSAGSGNSRPPR                                 | 1023.01       | 3      | 45.5  | Raft     | 0              | 0   | 0        | 1   | 0              | 0   | 0        | 0   | 0                       | 1                       | 0                        | 1                        |               |             |              | HSPBP1                          | IPI00100748                                                        | Isoform 1 of Hsp70-binding protein 1                                       |         |
| 230 | GGSVL <sup>VT</sup> CTSCDQPK                                                    | 854.576       | 2      | 66.7  | Non-raft | 0              | 0   | 0        | 0   | 0              | 0   | 1        | 0   | 1                       | 0                       | 1                        | 0                        |               |             |              | ICAM1                           | IPI00008494                                                        | Intercellular adhesion molecule 1 precursor                                | 48      |
| 231 | GGSVL <sup>VT</sup> CTSCDQPK                                                    | 854.16        | 2      | 44.7  | Non-raft | 0              | 2   | 2        | 2   | 1              | 1   | 1        | 0   | 4                       | 5                       | 4                        | 5                        | 0.80          | -0.223      | 0.723        | ICAM1                           | IPI00008494                                                        | Intercellular adhesion molecule 1 precursor                                |         |
| 232 | E <sup>CG</sup> LAAPR                                                           | 409.20        | 2      | 48.8  | Raft     | 0              | 0   | 0        | 0   | 0              | 1   | 0        | 0   | 0                       | 1                       | 0                        | 1                        |               |             |              | IRX6                            | IPI00400792                                                        | Iroquois-class homeodomain protein IRX-6                                   |         |
| 233 | SETV <sup>LTC</sup> CATGR                                                       | 569.49        | 2      | 87.7  | Non-raft | 6              | 0   | 5        | 0   | 4              | 0   | 4        | 0   | 19                      | 0                       | 19                       | 0                        |               | H           | ITGA3        | IPI00215995                     | Isoform Alpha-3A of Integrin alpha-3 precursor                     | 904                                                                        |         |
| 234 | SNGLIC <sup>CG</sup> NGVCK                                                      | 674.55        | 2      | 77.9  | Non-raft | 0              | 0   | 0        | 2   | 1              | 1   | 1        | 1   | 2                       | 4                       | 2                        | 4                        | 0.50          | -0.693      | 0.942        | ITGB1                           | IPI00217561                                                        | Isoform Beta-1C of Integrin beta-1 precursor                               |         |
| 235 | SNGLIC <sup>CG</sup> NGVCK                                                      | 673.98        | 2      | 59.6  | Non-raft | 2              | 2   | 0        | 0   | 0              | 0   | 0        | 0   | 2                       | 2                       | 2                        | 2                        | 1.00          | 0.000       | 0.551        | ITGB1                           | IPI00217561                                                        | Isoform Beta-1C of Integrin beta-1 precursor                               |         |
| 236 | VREAM <sup>CP</sup> VGSDSSLLLATQVEGQATNLQR                                      | 1087.61       | 3      | 82.3  | Raft     | 2              | 1   | 2        | 0   | 1              | 0   | 0        | 0   | 5                       | 1                       | 5                        | 1                        | 5.00          | 1.609       | 0.001        | JUP                             | IPI00554711                                                        | Junction plakoglobin                                                       | 90      |
| 237 | MEPWP <sup>CP</sup> SPGGGGGTR                                                   | 391.10        | 4      | 49.7  | Raft     | 0              | 0   | 0        | 1   | 0              | 0   | 0        | 0   | 0                       | 1                       | 0                        | 1                        |               |             |              | KCNG2                           | IPI00786999                                                        | PREDICTED: similar to Potassium voltage-gated channel subfamily G member 2 |         |
| 238 | MLQSLAGSS <sup>CV</sup> R                                                       | 626.47        | 2      | 86.3  | Non-raft | 3              | 0   | 1        | 0   | 0              | 0   | 0        | 0   | 4                       | 0                       | 4                        | 0                        |               | H           | KCNK1        | IPI00010476                     | Potassium channel subfamily K member 1                             | 10                                                                         |         |
| 239 | VQVTVKPVQHSIGTLPLMVEAILSVSIG <sup>CV</sup> TARSTK                               | 1223.29       | 3      | 45.1  | Non-raft | 1              | 0   | 0        | 0   | 0              | 0   | 0        | 0   | 1                       | 0                       | 1                        | 0                        |               |             |              | KIF13A                          | IPI00164861                                                        | KINESIN-13A1                                                               | 1058    |
| 240 | LPAGPDQDP <sup>CG</sup> SRPAPEGAGAPEQGHSAAGGGG <sup>WC</sup> RHC <sup>HTK</sup> | 1034.32       | 4      | 46.3  | Non-raft | 1              | 0   | 0        | 0   | 0              | 0   | 0        | 0   | 1                       | 0                       | 1                        | 0                        |               |             |              | KIF26A                          | IPI00788247                                                        | Kinesin-like protein KIF26A                                                | 45/70   |
| 241 | MNYYGNYGG <sup>LGY</sup> GGYGGFDDLGYGYG <sup>CG</sup> CGSFR                     | 924.54        | 4      | 47.2  | Non-raft | 0              | 0   | 1        | 0   | 0              | 0   | 0        | 0   | 1                       | 0                       | 1                        | 0                        |               |             |              | KRTAP19-5                       | IPI00373952                                                        | Keratin-associated protein 19-5                                            | 27      |
| 242 | GGHS <sup>CR</sup> GGVDTAAAPAGGAPPAHAPGPR                                       | 638.35        | 4      | 50.0  | Non-raft | 0              | 0   | 0        | 0   | 0              | 0   | 1        | 0   | 1                       | 0                       | 1                        | 0                        |               |             |              | LAGE3                           | IPI00032314                                                        | L antigen family member 3                                                  | 33      |
| 243 | ACGLVASNLN <sup>LKPGE</sup> CLR                                                 | 1013.25       | 2      | 104.9 | Non-raft | 8              | 7   | 5        | 6   | 4              | 7   | 5        | 4   | 22                      | 24                      | 107                      | 75                       | 1.43          | 0.355       | 0.271        | LGALS1                          | IPI00219219                                                        | Galectin-1                                                                 |         |
|     |                                                                                 | 1013.60       | 2      | 111.8 | Raft     | 26             | 14  | 24       | 13  | 19             | 14  | 16       | 10  | 85                      | 51                      |                          |                          |               |             | LGALS1       | IPI00219219                     | Galectin-1                                                         |                                                                            |         |
| 244 | ACGLVASNLN <sup>LKPGE</sup> CLR                                                 | 1013.74       | 2      | 94.8  | Non-raft | 1              | 3   | 2        | 2   | 5              | 2   | 4        | 2   | 12                      | 9                       | 17                       | 15                       | 1.13          | 0.125       | 0.448        | LGALS1                          | IPI00219219                                                        | Galectin-1                                                                 |         |
|     |                                                                                 | 676.12        | 3      | 65.9  | Raft     | 0              | 1   | 1        | 1   | 2              | 2   | 2        | 2   | 5                       | 6                       |                          |                          |               |             | LGALS1       | IPI00219219                     | Galectin-1                                                         |                                                                            |         |
| 245 | ACGLVASNLN <sup>LKPGE</sup> CLR                                                 | 951.23        | 2      | 87.4  | Non-raft | 1              | 2   | 2        | 3   | 0              | 2   | 2        | 2   | 5                       | 9                       | 27                       | 32                       | 0.84          | -0.170      | 0.685        | LGALS1                          | IPI00219219                                                        | Galectin-1                                                                 |         |
|     |                                                                                 | 951.25        | 2      | 108.5 | Raft     | 5              | 7   | 7        | 6   | 5              | 5   | 5        | 5   | 22                      | 23                      |                          |                          |               |             | LGALS1       | IPI00219219                     | Galectin-1                                                         |                                                                            |         |
| 246 | FNAHGDANTIV <sup>C</sup> NSK                                                    | 883.68        | 3      | 71.5  | Non-raft | 1              | 0   | 1        | 0   | 0              | 0   | 0        | 0   | 2                       | 0                       | 18                       | 15                       | 1.20          | 0.182       | 0.401        | LGALS1                          | IPI00219219                                                        | Galectin-1                                                                 |         |
|     |                                                                                 | 796.06        | 2      | 97.9  | Raft     | 4              | 4   | 4        | 4   | 4              | 4   | 4        | 3   | 16                      | 15                      |                          |                          |               |             | LGALS1       | IPI00219219                     | Galectin-1                                                         |                                                                            |         |
| 247 | SFVLNLGKDSN <sup>NL</sup> CLHFNPR                                               | 763.90        | 3      | 90.5  | Raft     | 2              | 0   | 3        | 0   | 0              | 0   | 0        | 0   | 5                       | 0                       | 5                        | 0                        |               | H           | LGALS1       | IPI00219219                     | Galectin-1                                                         | 43                                                                         |         |
| 248 | FQAPARET <sup>CV</sup> E <sup>CQ</sup> CK                                       | 868.21        | 2      | 50.6  | Raft     | 1              | 1   | 0        | 0   | 0              | 0   | 0        | 0   | 1                       | 1                       | 1                        | 1                        | 1.00          | 0.000       | 0.551        | LIMA1                           | IPI00008918                                                        | Isoform Beta of LIM domain and actin-binding protein 1                     |         |
| 249 | AQNTWGC <sup>GN</sup> SLR                                                       | 654.07        | 2      | 45.6  | Raft     | 0              | 0   | 0        | 1   | 0              | 0   | 0        | 0   | 0                       | 1                       | 0                        | 1                        |               |             |              | LMNA                            | IPI00021405                                                        | Isoform A of Lamin-A/C                                                     |         |
| 250 | SVTVVEDEDEDGDDLH <sup>HHHGHSHC</sup> SSSGDPAEYNLR                               | 1358.95       | 3      | 57.0  | Raft     | 0              | 0   | 0        | 0   | 0              | 0   | 1        | 0   | 1                       | 0                       | 1                        | 0                        |               |             |              | LMNA                            | IPI00021405                                                        | Isoform A of Lamin-A/C                                                     | 570     |
| 251 | TVL <sup>CG</sup> TCCGQPADKASASGSAQVGGPISSGSSASSVTVTR                           | 1256.04       | 3      | 155.6 | Raft     | 2              | 2   | 0        | 2   | 3              | 2   | 2        | 1   | 7                       | 7                       | 7                        | 7                        | 1.00          | 0.000       | 0.551        | LMNA                            | IPI00021405                                                        | Isoform A of Lamin-A/C                                                     |         |
| 252 | NNMIL <sup>C</sup> QMDYEEGQLNGTFESVQV                                           | 699.13        | 4      | 46.6  | Non-raft | 0              | 0   | 0        | 0   | 1              | 0   | 0        | 0   | 1                       | 0                       | 1                        | 0                        |               |             |              | LMO1                            | IPI00396316                                                        | Rhombotin-1                                                                | 138     |

| No. | Sequence                                   | Precursor m/z | Charge | Score | Fraction | Replicate      |     |          |     |                |     |          |     | Total EXP Each Fraction | Total CON Each Fraction | Total EXP Both Fractions | Total CON Both Fractions | EXP/CON Ratio | Ln(EXP/CON) | P-value     | Gene Symbol                                                                                                                            | Acc.Number      | Description                                                       | Site |
|-----|--------------------------------------------|---------------|--------|-------|----------|----------------|-----|----------|-----|----------------|-----|----------|-----|-------------------------|-------------------------|--------------------------|--------------------------|---------------|-------------|-------------|----------------------------------------------------------------------------------------------------------------------------------------|-----------------|-------------------------------------------------------------------|------|
|     |                                            |               |        |       |          | 1st Biological |     |          |     | 2nd Biological |     |          |     |                         |                         |                          |                          |               |             |             |                                                                                                                                        |                 |                                                                   |      |
|     |                                            |               |        |       |          | 1st Tech       |     | 2nd Tech |     | 1st Tech       |     | 2nd Tech |     |                         |                         |                          |                          |               |             |             |                                                                                                                                        |                 |                                                                   |      |
|     |                                            |               |        |       |          | EXP            | CON | EXP      | CON | EXP            | CON | EXP      | CON |                         |                         |                          |                          |               |             |             |                                                                                                                                        |                 |                                                                   |      |
| 253 | CPGVMGVSTQSIIVLPVGFPKPSTMNVQWK             | 980.80        | 4      | 44.3  | Raft     | 0              | 0   | 0        | 0   | 0              | 0   | 0        | 1   | 0                       | 1                       | 0                        | 1                        |               | LOC257358   | IPI00402539 | LOC257358 protein                                                                                                                      |                 |                                                                   |      |
| 254 | MLLCTSASSSCGCCCGRLLR                       | 492.57        | 4      | 44.7  | Raft     | 1              | 0   | 0        | 0   | 0              | 0   | 0        | 0   | 1                       | 0                       | 1                        | 0                        |               | LOC388022   | IPI00418624 | cDNA FLJ29006 fis, clone STM02533                                                                                                      | 4/11/13/14/15   |                                                                   |      |
| 255 | GGSPDSAHGSRPAEAGVSAQCR                     | 525.54        | 4      | 47.0  | Raft     | 0              | 0   | 1        | 0   | 0              | 0   | 0        | 0   | 1                       | 0                       | 1                        | 0                        |               | LOC642648   | IPI00743102 | cDNA FLJ41389 fis, clone BRcAN2024563                                                                                                  | 125             |                                                                   |      |
| 256 | EQEMRMGDMGPCGAINMGDAFSPAPAGNQPPPM TGMNMMNR | 1108.87       | 4      | 44.9  | Raft     | 0              | 0   | 0        | 1   | 0              | 0   | 0        | 0   | 0                       | 1                       | 0                        | 1                        |               | LOC649009   | IPI00738041 | PREDICTED: similar to paraspeckle protein 1 isoform 1                                                                                  |                 |                                                                   |      |
| 257 | VLLAGTGPEGGGARCMTPPPSPPR                   | 619.58        | 4      | 46.2  | Raft     | 1              | 0   | 0        | 0   | 0              | 0   | 0        | 0   | 1                       | 0                       | 1                        | 0                        |               | LOC651746   | IPI00235708 | PREDICTED: similar to ankyrin repeat domain 33                                                                                         | 16              |                                                                   |      |
| 258 | MAAAAVQGERSGGSGGCSGAGGASNCGTGSGR           | 957.80        | 3      | 53.2  | Non-raft | 0              | 0   | 1        | 0   | 0              | 0   | 0        | 0   | 1                       | 0                       | 1                        | 0                        |               | LOC653566   | IPI00452747 | PREDICTED: similar to Signal peptidase complex subunit 2 (Microsomal signal peptidase 25 kDa subunit) (SPase 25 kDa subunit) isoform 1 | 17              |                                                                   |      |
| 259 | LPEALFQPCFLGMESCIGHIHTTFNSIMK              | 1088.00       | 3      | 62.2  | Raft     | 2              | 0   | 0        | 0   | 0              | 0   | 0        | 0   | 2                       | 0                       | 2                        | 0                        | M             | LOC653781   | IPI00479743 | protein expressed in prostate, ovary, testis, and placenta 2                                                                           | 965/972         |                                                                   |      |
| 260 | CDCFHMLVLPWPGTIPGSVSGR                     | 1146.10       | 2      | 72.5  | Raft     | 0              | 0   | 0        | 0   | 2              | 0   | 0        | 0   | 2                       | 0                       | 2                        | 0                        | M             | LOC730269   | IPI00787939 | PREDICTED: similar to periaxin                                                                                                         | 2/4             |                                                                   |      |
| 261 | RAPPGGGSGTPEPGCCAPR                        | 650.88        | 3      | 51.6  | Raft     | 1              | 0   | 0        | 0   | 0              | 0   | 0        | 0   | 1                       | 0                       | 1                        | 0                        |               | LOC731200   | IPI00641651 | OTTHUMP00000017000                                                                                                                     | 96              |                                                                   |      |
| 262 | CARCGENVVGEGTGCTAMDQVHVDCFTCIICNNK         | 971.43        | 4      | 47.8  | Raft     | 0              | 1   | 0        | 0   | 0              | 0   | 0        | 0   | 0                       | 1                       | 0                        | 1                        |               | LPP         | IPI00023704 | Lipoma-preferred partner                                                                                                               |                 |                                                                   |      |
| 263 | VPPTTAVEATVGCASSSTQSTR                     | 740.99        | 3      | 51.4  | Raft     | 0              | 1   | 0        | 0   | 0              | 0   | 0        | 0   | 0                       | 1                       | 0                        | 1                        |               | LRP12       | IPI00021027 | Low-density lipoprotein receptor-related protein 12 precursor                                                                          |                 |                                                                   |      |
| 264 | MFHCIPLWR                                  | 622.90        | 2      | 52.5  | Non-raft | 1              | 0   | 0        | 0   | 0              | 0   | 0        | 0   | 1                       | 0                       | 1                        | 0                        |               | LRRC1       | IPI00427739 | Isoform 1 of Leucine-rich repeat-containing protein 1                                                                                  | 4               |                                                                   |      |
| 265 | AMGTVIIAGVVCGVVCIMMVVAAAYGCIYASLMAK YHR    | 1032.70       | 4      | 47.3  | Raft     | 0              | 0   | 0        | 0   | 1              | 0   | 0        | 0   | 1                       | 0                       | 1                        | 0                        |               | LRTM2       | IPI00167619 | cDNA FLJ38291 fis, clone FcBBF3009069, weakly similar to Homo sapiens HT017 mRNA                                                       | 318/333         |                                                                   |      |
| 266 | TALLLLAALAVATGPGGGAGPAESPGLCWAR            | 730.55        | 4      | 45.7  | Non-raft | 0              | 0   | 0        | 0   | 0              | 0   | 1        | 0   | 1                       | 0                       | 1                        | 0                        |               | LY6D        | IPI00797939 | 3 kDa protein                                                                                                                          | 31              |                                                                   |      |
| 267 | AVVMISCNRHLDADNPNVSEER                     | 869.04        | 3      | 101.1 | Non-raft | 2              | 0   | 2        | 0   | 2              | 0   | 1        | 0   | 7                       | 0                       | 7                        | 0                        | H             | M6PR        | IPI00025049 | Cation-dependent mannose-6-phosphate receptor precursor                                                                                | 145             |                                                                   |      |
| 268 | GCSLGDVGGHGCGGGRR                          | 515.84        | 3      | 52.1  | Raft     | 0              | 1   | 0        | 0   | 0              | 0   | 0        | 0   | 0                       | 1                       | 0                        | 1                        |               | MAFK        | IPI00065538 | cDNA FLJ32205 fis, clone PLAcE6003094                                                                                                  |                 |                                                                   |      |
| 269 | LQTCMSGTGMR                                | 433.31        | 3      | 47.1  | Non-raft | 0              | 1   | 0        | 0   | 0              | 0   | 0        | 0   | 0                       | 1                       | 0                        | 1                        |               | MAP3K3      | IPI00017801 | mitogen-activated protein kinase kinase kinase 3 isoform 2                                                                             |                 |                                                                   |      |
| 270 | KFDEGENSLGQNSFSTNNVCCNQNEIASR              | 1111.64       | 3      | 57.7  | Non-raft | 0              | 0   | 0        | 1   | 0              | 0   | 0        | 0   | 0                       | 1                       | 0                        | 1                        |               | MBOAT2      | IPI00419221 | O-acyltransferase (membrane bound) domain containing 2                                                                                 |                 |                                                                   |      |
| 271 | GSAGSACSLICCCCGRDPEEHSLLVN                 | 846.72        | 3      | 50.9  | Non-raft | 1              | 0   | 0        | 0   | 0              | 0   | 0        | 0   | 1                       | 0                       | 1                        | 0                        |               | MCOLN1      | IPI00003750 | Isoform 2 of Mucolipin-1                                                                                                               | 526/530/531/532 |                                                                   |      |
| 272 | VIVVGNPANTNCLTASK                          | 851.13        | 2      | 70.5  | Non-raft | 1              | 0   | 0        | 0   | 0              | 0   | 0        | 0   | 1                       | 0                       | 1                        | 0                        |               | MDH1        | IPI00291005 | Malate dehydrogenase, cytoplasmic                                                                                                      | 137             |                                                                   |      |
| 273 | SQETECYFYSTPLLLGK                          | 959.14        | 2      | 44.1  | Non-raft | 0              | 0   | 0        | 1   | 0              | 0   | 0        | 0   | 0                       | 1                       | 0                        | 1                        |               | MDH2        | IPI00291006 | Malate dehydrogenase, mitochondrial precursor                                                                                          |                 |                                                                   |      |
| 274 | CPPGRYPGCEQLCGCLNGGSCDAATGACR              | 1181.91       | 3      | 46.4  | Raft     | 0              | 0   | 1        | 0   | 0              | 0   | 0        | 0   | 1                       | 0                       | 1                        | 0                        |               | MEGF6       | IPI00306850 | EGF-like-domain, multiple 3                                                                                                            | 739             |                                                                   |      |
| 275 | LHEYCGGGGAGGSGHGTGAGR                      | 639.24        | 3      | 45.8  | Non-raft | 0              | 0   | 0        | 0   | 1              | 0   | 0        | 0   | 1                       | 0                       | 1                        | 0                        |               | MEGF8       | IPI00027310 | Isoform 1 of Multiple epidermal growth factor-like domains 8                                                                           | 2325            |                                                                   |      |
| 276 | SAQFEHTLLVDTDGCILTR                        | 745.63        | 3      | 62.0  | Raft     | 0              | 0   | 0        | 0   | 1              | 0   | 0        | 0   | 1                       | 0                       | 1                        | 0                        |               | METAP1      | IPI00022239 | Methionine aminopeptidase 1                                                                                                            | 368             |                                                                   |      |
| 277 | DASSGNLCTEITQIGICHMKMK                     | 762.58        | 3      | 49.3  | Non-raft | 0              | 0   | 0        | 0   | 1              | 0   | 0        | 0   | 1                       | 0                       | 1                        | 0                        |               | MGC21881    | IPI00742024 | MGC21881 protein (Fragment)                                                                                                            | 65              |                                                                   |      |
| 278 | VNMYCVTDDQLICALCK                          | 519.21        | 4      | 46.2  | Raft     | 0              | 0   | 0        | 0   | 1              | 0   | 0        | 0   | 1                       | 0                       | 1                        | 0                        |               | MID1        | IPI00029324 | Isoform 1 of Midline-1                                                                                                                 | 195/198         |                                                                   |      |
| 279 | CMPAPEIIEVELPASK                           | 872.18        | 2      | 45.0  | Raft     | 0              | 0   | 0        | 0   | 0              | 0   | 0        | 1   | 0                       | 1                       | 0                        | 1                        |               | MKI67       | IPI00004233 | Isoform Long of Antigen KI-67                                                                                                          | 3014            |                                                                   |      |
| 280 | MPCESSPPESADTPTSTR                         | 947.12        | 2      | 63.3  | Raft     | 1              | 0   | 0        | 0   | 0              | 0   | 0        | 0   | 1                       | 0                       | 1                        | 0                        |               | MKI67       | IPI00004233 | Isoform Long of Antigen KI-67                                                                                                          | 1373            |                                                                   |      |
| 281 | AAAAGGGS CPGPSARGR                         | 386.39        | 4      | 47.6  | Raft     | 1              | 0   | 0        | 0   | 0              | 1   | 0        | 0   | 1                       | 1                       | 1                        | 1                        | 1.00          | 0.000       | 0.551       | MLL4                                                                                                                                   | IPI00218823     | Isoform 1 of Myeloid/lymphoid or mixed-lineage leukemia protein 4 |      |
| 282 | SDGREVQLLEEDPDLQLPFLLPEDGYS CDVVR          | 1179.00       | 3      | 48.7  | Raft     | 1              | 0   | 0        | 0   | 0              | 0   | 0        | 0   | 1                       | 0                       | 1                        | 0                        |               | MLLT4       | IPI00023461 | Isoform 4 of Afadin                                                                                                                    | 762             |                                                                   |      |
| 283 | RLLYQQR                                    | 476.58        | 2      | 45.6  | Non-raft | 0              | 0   | 0        | 0   | 0              | 0   | 2        | 0   | 2                       | 0                       | 2                        | 0                        | M             | MMP14       | IPI00218398 | Matrix metalloproteinase-14 precursor                                                                                                  | 574             |                                                                   |      |
| 284 | LQATTSGRWATELPWMCWHANSGSALF                | 774.79        | 4      | 45.6  | Raft     | 0              | 0   | 1        | 0   | 0              | 0   | 0        | 0   | 1                       | 0                       | 1                        | 0                        |               | MMP28       | IPI00425258 | Matrix metalloproteinase-28 precursor                                                                                                  | 510             |                                                                   |      |
| 285 | SGGGSSVSGGGGGGAGAGCGGPGGALTRR              | 811.98        | 3      | 45.9  | Raft     | 0              | 1   | 0        | 0   | 0              | 0   | 0        | 0   | 0                       | 1                       | 0                        | 1                        |               | MPND        | IPI00014455 | Mov34/MPN/PAD-1 family protein                                                                                                         |                 |                                                                   |      |
| 286 | VASMAQSAPSEAPSCSPFGK                       | 976.59        | 2      | 87.3  | Non-raft | 2              | 0   | 2        | 0   | 0              | 0   | 0        | 0   | 4                       | 0                       | 4                        | 0                        | H             | MPP1        | IPI00215610 | 55 kDa erythrocyte membrane protein                                                                                                    | 242             |                                                                   |      |
| 287 | DLELTPNSGTL CGSLSGK                        | 896.46        | 2      | 49.4  | Non-raft | 0              | 0   | 1        | 0   | 0              | 0   | 0        | 0   | 1                       | 0                       | 1                        | 0                        |               | MPP2        | IPI00217808 | Isoform 1 of MAGUK p55 subfamily member 2                                                                                              | 338             |                                                                   |      |
| 288 | RDWDNSGPFCTGISSK                           | 885.71        | 2      | 62.4  | Non-raft | 1              | 0   | 1        | 0   | 0              | 0   | 0        | 0   | 2                       | 0                       | 2                        | 0                        | M             | MPP6        | IPI00303280 | MAGUK p55 subfamily member 6                                                                                                           | 298             |                                                                   |      |
| 289 | SSIEVSDDTDQEIEEACMAR                       | 1123.18       | 2      | 95.0  | Non-raft | 0              | 0   | 1        | 0   | 0              | 0   | 0        | 0   | 1                       | 0                       | 2                        | 0                        | M             | MPZL3       | IPI00375222 | QQRG2966                                                                                                                               | 215             |                                                                   |      |
|     |                                            | 1122.42       | 2      | 72.4  | Raft     | 0              | 0   | 0        | 0   | 1              | 0   | 0        | 0   | 1                       | 0                       | 1                        | 0                        |               | MPZL3       | IPI00375222 | QQRG2966                                                                                                                               |                 |                                                                   |      |
| 290 | CCCLGHMACMVENECEDPSQETITFLYK               | 908.58        | 4      | 48.6  | Raft     | 0              | 0   | 0        | 0   | 1              | 0   | 0        | 0   | 1                       | 0                       | 1                        | 0                        |               | MSH6        | IPI00440122 | Sperm protein                                                                                                                          | 237/243         |                                                                   |      |
| 291 | MDPNCSCCTTGGSACAGSCKCK                     | 637.15        | 4      | 46.0  | Non-raft | 1              | 0   | 0        | 0   | 0              | 0   | 0        | 0   | 1                       | 0                       | 1                        | 0                        |               | MT1B        | IPI00011655 | Metallothionein-1B                                                                                                                     | 15/19/21        |                                                                   |      |
| 292 | MDPNCSCAAAGVSCCTCASSCKCK                   | 638.26        | 4      | 47.5  | Non-raft | 0              | 0   | 0        | 0   | 1              | 0   | 0        | 0   | 1                       | 0                       | 1                        | 0                        |               | MT1G        | IPI00008752 | Isoform 1 of Metallothionein-1G                                                                                                        | 5/14/16/22      |                                                                   |      |
| 293 | DPNYSCTTGGSCTCAGSCK                        | 475.06        | 4      | 47.2  | Raft     | 0              | 1   | 0        | 0   | 0              | 0   | 0        | 0   | 0                       | 1                       | 0                        | 1                        |               | MT1JP       | IPI00329473 | MTB                                                                                                                                    |                 |                                                                   |      |

| No. | Sequence                                      | Precursor<br>m/z | Charge | Score | Fraction | Replicate      |     |          |     |                |     |          |     | Total<br>EXP<br>Each<br>Fraction | Total<br>CON<br>Each<br>Fraction | Total<br>EXP<br>Both<br>Fractions | Total<br>CON<br>Both<br>Fractions | EXP/<br>CON<br>Ratio | Ln(EXP<br>/CON) | P-<br>value | Gene<br>Symbol | Acc.Number                                                         | Description                                                | Site |
|-----|-----------------------------------------------|------------------|--------|-------|----------|----------------|-----|----------|-----|----------------|-----|----------|-----|----------------------------------|----------------------------------|-----------------------------------|-----------------------------------|----------------------|-----------------|-------------|----------------|--------------------------------------------------------------------|------------------------------------------------------------|------|
|     |                                               |                  |        |       |          | 1st Biological |     |          |     | 2nd Biological |     |          |     |                                  |                                  |                                   |                                   |                      |                 |             |                |                                                                    |                                                            |      |
|     |                                               |                  |        |       |          | 1st Tech       |     | 2nd Tech |     | 1st Tech       |     | 2nd Tech |     |                                  |                                  |                                   |                                   |                      |                 |             |                |                                                                    |                                                            |      |
|     |                                               |                  |        |       |          | EXP            | CON | EXP      | CON | EXP            | CON | EXP      | CON |                                  |                                  |                                   |                                   |                      |                 |             |                |                                                                    |                                                            |      |
| 294 | SKIVGAPMHDLLLNWNAVTTCHSK                      | 913.74           | 3      | 78.9  | Non-raft | 2              | 0   | 1        | 0   | 2              | 0   | 0        | 0   | 5                                | 0                                | 5                                 | 0                                 |                      | H               | MTHFD1      | IPI00218342    | C-1-tetrahydrofolate synthase, cytoplasmic                         | 195                                                        |      |
| 295 | VVTENVP CGTGTTC SK                            | 456.86           | 4      | 44.4  | Raft     | 0              | 0   | 1        | 0   | 0              | 0   | 0        | 0   | 1                                | 0                                | 1                                 | 0                                 |                      |                 | MUC5AC      | IPI00103397    | Mucin 5 (Fragment)                                                 | 953                                                        |      |
| 296 | DQALAE RCLAA LTECAASGDGNILA V DASR            | 798.19           | 4      | 51.2  | Non-raft | 0              | 0   | 0        | 0   | 1              | 0   | 0        | 0   | 1                                | 0                                | 1                                 | 0                                 |                      |                 | MUT         | IPI00024934    | Methylmalonyl-CoA mutase, mitochondrial precursor                  | 533/540                                                    |      |
| 297 | ALALAALAAVEPACGSR                             | 813.55           | 2      | 66.6  | Raft     | 0              | 0   | 0        | 0   | 1              | 0   | 1        | 0   | 2                                | 0                                | 2                                 | 0                                 |                      | M               | NDFIP1      | IPI00012235    | Isoform 1 of NEDD4 family-interacting protein 1                    | 15                                                         |      |
| 298 | FACHSASLTVR                                   | 596.56           | 2      | 62.3  | Raft     | 2              | 0   | 2        | 0   | 1              | 0   | 1        | 0   | 6                                | 0                                | 6                                 | 0                                 |                      | H               | NONO        | IPI00304596    | Non-POU domain-containing octamer-binding protein                  | 145                                                        |      |
| 299 | LPPDPSP LCVL VGPGT GIAPFR                     | 555.34           | 4      | 47.0  | Raft     | 0              | 1   | 0        | 0   | 0              | 0   | 0        | 0   | 0                                | 1                                | 0                                 | 1                                 |                      |                 | NOS3        | IPI00218845    | Nitric-oxide synthase, endothelial                                 |                                                            |      |
| 300 | MEDSMDMDMSPLRPQNYLFGCELK                      | 965.58           | 3      | 62.2  | Raft     | 2              | 1   | 1        | 1   | 1              | 0   | 0        | 0   | 4                                | 2                                | 4                                 | 2                                 | 2.00                 | 0.693           | 0.095       | NPM1           | IPI00220740                                                        | Isoform 2 of Nucleophosmin                                 | 11   |
| 301 | EVGKILCTDCATRPK                               | 817.86           | 2      | 49.0  | Raft     | 0              | 1   | 0        | 0   | 0              | 0   | 0        | 0   | 0                                | 1                                | 0                                 | 1                                 |                      |                 | NRG2        | IPI00003044    | Isoform 6 of Pro-neuregulin-2, membrane-bound isoform precursor    |                                                            |      |
| 302 | SYLHLFYEDCAGTALSDDPEGPPVLQPR                  | 1022.95          | 3      | 64.1  | Non-raft | 1              | 0   | 0        | 0   | 0              | 0   | 0        | 0   | 1                                | 0                                | 1                                 | 0                                 |                      |                 | NRSN2       | IPI00017231    | Protein C20orf98                                                   | 36/52                                                      |      |
| 303 | IWKISCWR                                      | 546.79           | 2      | 46.4  | Raft     | 1              | 0   | 0        | 0   | 0              | 0   | 0        | 0   | 1                                | 0                                | 1                                 | 0                                 |                      |                 | NUP107      | IPI00028005    | Nuclear pore complex protein Nup107                                | 411                                                        |      |
| 304 | TLPLCVIGGDHK                                  | 418.02           | 3      | 45.0  | Raft     | 0              | 0   | 0        | 0   | 0              | 1   | 0        | 0   | 0                                | 1                                | 0                                 | 1                                 |                      |                 | NUP37       | IPI00171665    | Nucleoporin Nup37                                                  |                                                            |      |
| 305 | VLILPSCGPPSLPLAAIPGCSQ                        | 708.69           | 3      | 47.9  | Raft     | 0              | 0   | 0        | 0   | 1              | 0   | 0        | 0   | 1                                | 0                                | 1                                 | 0                                 |                      |                 | NXF5        | IPI00745675    | 46 kDa protein                                                     | 382/395                                                    |      |
| 306 | CLLLAPAAPAVPPR                                | 496.03           | 3      | 50.6  | Raft     | 0              | 0   | 0        | 1   | 0              | 0   | 0        | 0   | 0                                | 1                                | 0                                 | 1                                 |                      |                 | OTUD1       | IPI00174955    | PREDICTED: similar to OTU domain containing 5                      |                                                            |      |
| 307 | LKGPNHAVSTACTTGAAHVGDSFR                      | 800.04           | 3      | 63.8  | Non-raft | 2              | 0   | 0        | 0   | 0              | 0   | 0        | 0   | 2                                | 0                                | 2                                 | 0                                 |                      | M               | OXSM        | IPI00016637    | 3-oxoacyl-[acyl-carrier-protein] synthase, mitochondrial precursor | 209                                                        |      |
| 308 | SKGFGFVCFSSPEEATK                             | 911.04           | 2      | 72.7  | Raft     | 0              | 0   | 0        | 0   | 0              | 0   | 1        | 0   | 1                                | 0                                | 1                                 | 0                                 |                      |                 | PABPC1      | IPI00008524    | Isoform 1 of Polyadenylate-binding protein 1                       | 339                                                        |      |
| 309 | VMTIPYQMPASSPVICAGQDR                         | 807.32           | 3      | 60.7  | Raft     | 0              | 0   | 0        | 0   | 0              | 0   | 2        | 0   | 2                                | 0                                | 2                                 | 0                                 |                      | M               | PCBP1       | IPI00016610    | Poly(rc)-binding protein 1                                         | 194                                                        |      |
| 310 | AALANLIGDVTIAIDGENTSNMTHLEAQR                 | 1086.26          | 3      | 58.9  | Raft     | 0              | 0   | 1        | 0   | 0              | 0   | 0        | 0   | 1                                | 0                                | 1                                 | 0                                 |                      |                 | PDLIM1      | IPI00010414    | PDZ and LIM domain protein 1                                       | 45                                                         |      |
| 311 | RCAGFVVGDLYALLTHSSR                           | 517.11           | 4      | 47.8  | Raft     | 1              | 0   | 0        | 0   | 0              | 0   | 0        | 0   | 1                                | 0                                | 1                                 | 0                                 |                      |                 | PEX6        | IPI00103760    | Peroxin Pex6p                                                      | 627                                                        |      |
| 312 | EVLFAFEESIGFLCGTSLVDKDGVSAAVVVAEMASY LETMNTLK | 1201.20          | 4      | 45.4  | Raft     | 1              | 0   | 0        | 0   | 0              | 0   | 0        | 0   | 1                                | 0                                | 1                                 | 0                                 |                      |                 | PGM2L1      | IPI00173346    | Phosphoglucomutase-2-like 1                                        | 441                                                        |      |
| 313 | VSSPGGGPDCCR                                  | 622.23           | 2      | 57.5  | Non-raft | 0              | 1   | 0        | 0   | 0              | 0   | 0        | 0   | 0                                | 1                                | 0                                 | 1                                 |                      |                 | PGS1        | IPI00217795    | PGS1 protein                                                       |                                                            |      |
| 314 | AEGSDVANAVLDGADCMILSGETAKGDYPLEAVR            | 1147.54          | 3      | 47.0  | Non-raft | 0              | 0   | 1        | 0   | 0              | 0   | 0        | 0   | 1                                | 0                                | 1                                 | 0                                 |                      |                 | PKM2        | IPI00220644    | pyruvate kinase 3 isoform 2                                        | 358                                                        |      |
| 315 | NTGIUCTIGPASR                                 | 652.53           | 2      | 74.4  | Non-raft | 2              | 2   | 2        | 2   | 2              | 2   | 2        | 2   | 8                                | 8                                | 8                                 | 8                                 | 1.00                 | 0.000           | 0.551       | PKM2           | IPI00220644                                                        | pyruvate kinase 3 isoform 2                                |      |
| 316 | SKPHSEAGTAFIQQLHAAMADTFLEHMC R                | 1167.97          | 3      | 51.3  | Non-raft | 1              | 0   | 0        | 0   | 0              | 0   | 0        | 0   | 1                                | 0                                | 1                                 | 0                                 |                      |                 | PKM2        | IPI00220644    | pyruvate kinase 3 isoform 2                                        | 31                                                         |      |
| 317 | NIQTDNKNKSGCFGSR                              | 877.89           | 2      | 83.6  | Raft     | 3              | 0   | 2        | 0   | 3              | 0   | 0        | 0   | 8                                | 0                                | 8                                 | 0                                 |                      | H               | PKP2        | IPI00005264    | Isoform 2 of Plakophilin-2                                         | 647                                                        |      |
| 318 | DLGAPPGEVVCGFTPQSR                            | 951.13           | 2      | 47.1  | Non-raft | 1              | 0   | 0        | 0   | 0              | 0   | 0        | 0   | 1                                | 0                                | 5                                 | 0                                 |                      | H               | PKP3        | IPI00026952    | Plakophilin-3                                                      | 569                                                        |      |
|     |                                               | 951.32           | 2      | 58.7  | Raft     | 2              | 0   | 1        | 0   | 1              | 0   | 0        | 0   | 4                                | 0                                | 4                                 | 0                                 |                      |                 | PKP3        | IPI00026952    | Plakophilin-3                                                      |                                                            |      |
| 319 | AGAQPVGHALQLKPVCVSDSLK                        | 566.52           | 4      | 44.8  | Raft     | 0              | 1   | 0        | 0   | 0              | 0   | 0        | 0   | 0                                | 1                                | 0                                 | 1                                 |                      |                 | PLCB1       | IPI00216920    | OTTHUMP0000030235                                                  |                                                            |      |
| 320 | SGGHRIPGLNCCGQGR                              | 537.92           | 3      | 53.7  | Raft     | 0              | 0   | 1        | 0   | 0              | 0   | 0        | 0   | 1                                | 0                                | 1                                 | 0                                 |                      |                 | PLD1        | IPI00012865    | Isoform PLD1A of Phospholipase D1                                  | 240/241                                                    |      |
| 321 | ADSERLSAPGCWAACTNFSR                          | 729.58           | 3      | 62.3  | Non-raft | 5              | 0   | 1        | 0   | 4              | 0   | 0        | 0   | 10                               | 0                                | 10                                | 0                                 |                      | H               | PLP2        | IPI00030362    | Proteolipid protein 2                                              | 12/16                                                      |      |
| 322 | VYFAAEDTDCCTR                                 | 809.69           | 2      | 46.0  | Non-raft | 0              | 0   | 0        | 0   | 1              | 0   | 1        | 0   | 2                                | 0                                | 2                                 | 0                                 |                      | M               | PLSCR1      | IPI00005181    | Phospholipid scramblase 1                                          | 148                                                        |      |
| 323 | VYFAAEDTDCCTR                                 | 810.14           | 2      | 83.6  | Non-raft | 2              | 0   | 2        | 0   | 0              | 0   | 0        | 0   | 4                                | 0                                | 4                                 | 0                                 |                      | H               | PLSCR1      | IPI00005181    | Phospholipid scramblase 1                                          | 149                                                        |      |
| 324 | VYFAAEDTDCCTR                                 | 747.46           | 2      | 105.1 | Non-raft | 2              | 0   | 2        | 0   | 2              | 0   | 1        | 0   | 7                                | 0                                | 15                                | 0                                 |                      | H               | PLSCR1      | IPI00005181    | Phospholipid scramblase 1                                          | 148/149                                                    |      |
|     |                                               | 747.96           | 2      | 101.6 | Raft     | 2              | 0   | 2        | 0   | 2              | 0   | 2        | 0   | 8                                | 0                                | 8                                 | 0                                 |                      |                 | PLSCR1      | IPI00005181    | Phospholipid scramblase 1                                          |                                                            |      |
| 325 | SGAGQPLGQAAEESNCCAR                           | 987.72           | 2      | 95.9  | Non-raft | 3              | 0   | 2        | 0   | 3              | 0   | 1        | 0   | 9                                | 0                                | 9                                 | 0                                 |                      | H               | PLSCR3      | IPI00216127    | Phospholipid scramblase 3                                          | 125                                                        |      |
| 326 | SGAGQPLGQAAEESNCCAR                           | 988.17           | 2      | 96.1  | Non-raft | 1              | 0   | 2        | 0   | 1              | 0   | 2        | 0   | 6                                | 0                                | 6                                 | 0                                 |                      | H               | PLSCR3      | IPI00216127    | Phospholipid scramblase 3                                          | 126                                                        |      |
| 327 | SGAGQPLGQAAEESNCCAR                           | 925.55           | 2      | 99.4  | Non-raft | 2              | 0   | 1        | 0   | 4              | 0   | 2        | 0   | 9                                | 0                                | 17                                | 0                                 |                      | H               | PLSCR3      | IPI00216127    | Phospholipid scramblase 3                                          | 125/126                                                    |      |
|     |                                               | 925.59           | 2      | 105.2 | Raft     | 2              | 0   | 2        | 0   | 2              | 0   | 2        | 0   | 8                                | 0                                | 8                                 | 0                                 |                      |                 | PLSCR3      | IPI00216127    | Phospholipid scramblase 3                                          |                                                            |      |
| 328 | SGAGQPLGQAAEESNCCARLCCGAR                     | 818.19           | 3      | 45.6  | Non-raft | 1              | 0   | 0        | 0   | 0              | 0   | 0        | 0   | 1                                | 0                                | 2                                 | 0                                 |                      | M               | PLSCR3      | IPI00216127    | Phospholipid scramblase 3                                          | 125/126/<br>130/131                                        |      |
|     |                                               | 818.17           | 3      | 47.0  | Raft     | 0              | 0   | 0        | 0   | 0              | 0   | 1        | 0   | 1                                | 0                                | 1                                 | 0                                 |                      |                 | PLSCR3      | IPI00216127    | Phospholipid scramblase 3                                          |                                                            |      |
| 329 | VVGPWCWTCGCTDTNFEVK                           | 1009.18          | 2      | 60.0  | Non-raft | 2              | 0   | 0        | 0   | 1              | 0   | 1        | 0   | 4                                | 0                                | 4                                 | 0                                 |                      | H               | PLSCR3      | IPI00216127    | Phospholipid scramblase 3                                          | 211/214/<br>216                                            |      |
| 330 | VRGPCSTYGC GSDSVFEVK                          | 996.39           | 2      | 61.1  | Non-raft | 3              | 0   | 2        | 0   | 0              | 0   | 0        | 0   | 5                                | 0                                | 5                                 | 0                                 |                      | H               | PLSCR4      | IPI00016776    | Phospholipid scramblase 4                                          | 250/255                                                    |      |
| 331 | MAEASSANLGS GCEKR                             | 439.73           | 4      | 45.3  | Raft     | 0              | 0   | 1        | 0   | 0              | 0   | 0        | 0   | 1                                | 0                                | 1                                 | 0                                 |                      |                 | PMF1        | IPI00178359    | Isoform 3 of Polyamine-modulated factor 1                          | 13                                                         |      |
| 332 | YFVKDVLGCV CVNPR                              | 443.20           | 4      | 48.3  | Non-raft | 0              | 0   | 0        | 0   | 0              | 1   | 0        | 0   | 0                                | 1                                | 0                                 | 1                                 |                      |                 | POLA2       | IPI00290272    | DNA polymerase subunit alpha B                                     |                                                            |      |
| 333 | ALEYSNGIFDCQSPTSPFMGSLR                       | 635.36           | 4      | 49.0  | Non-raft | 0              | 0   | 0        | 0   | 1              | 0   | 0        | 0   | 1                                | 0                                | 1                                 | 0                                 |                      |                 | PPFIBP1     | IPI00179172    | Isoform 2 of Liprin-beta-1                                         | 35                                                         |      |
| 334 | KITTIADCGGLE                                  | 595.74           | 2      | 92.3  | Non-raft | 2              | 2   | 2        | 2   | 2              | 2   | 1        | 2   | 7                                | 8                                | 15                                | 15                                | 1.00                 | 0.000           | 0.551       | PPIAP19        | IPI00374732                                                        | PREDICTED: similar to peptidylprolyl isomerase A isoform 1 |      |
|     |                                               | 595.85           | 2      | 96.3  | Raft     | 2              | 2   | 2        | 2   | 2              | 2   | 1        | 8   | 8                                | 7                                | 7                                 | 7                                 |                      |                 | PPIAP19     | IPI00374732    | PREDICTED: similar to peptidylprolyl isomerase A isoform 1         |                                                            |      |
| 335 | MLSSPASCTSPDPGENPCK                           | 566.68           | 4      | 47.8  | Non-raft | 0              | 0   | 1        | 0   | 0              | 0   | 0        | 0   | 1                                | 0                                | 1                                 | 0                                 |                      |                 | PPP1R14D    | IPI00015106    | Protein phosphatase 1 regulatory subunit 14D                       | 47                                                         |      |
| 336 | SDGSACNSGISGGRGR                              | 371.20           | 4      | 47.5  | Non-raft | 1              | 0   | 0        | 0   | 0              | 0   | 0        | 0   | 1                                | 0                                | 1                                 | 0                                 |                      |                 | PRAC        | IPI00064590    | small nuclear protein PRAC                                         | 84                                                         |      |



| No. | Sequence                                                                                                                                                                                    | Precursor<br>m/z | Charge | Score | Fraction | Replicate      |     |          |   |                |   |          |    | Total<br>EXP<br>Each<br>Fraction | Total<br>CON<br>Each<br>Fraction | Total<br>EXP<br>Both<br>Fractions | Total<br>CON<br>Both<br>Fractions | EXP/<br>CON<br>Ratio | Ln(EXP<br>/CON) | P-<br>value | Gene<br>Symbol | Acc.Number                                                       | Description                                         | Site                        |
|-----|---------------------------------------------------------------------------------------------------------------------------------------------------------------------------------------------|------------------|--------|-------|----------|----------------|-----|----------|---|----------------|---|----------|----|----------------------------------|----------------------------------|-----------------------------------|-----------------------------------|----------------------|-----------------|-------------|----------------|------------------------------------------------------------------|-----------------------------------------------------|-----------------------------|
|     |                                                                                                                                                                                             |                  |        |       |          | 1st Biological |     |          |   | 2nd Biological |   |          |    |                                  |                                  |                                   |                                   |                      |                 |             |                |                                                                  |                                                     |                             |
|     |                                                                                                                                                                                             |                  |        |       |          | 1st Tech       |     | 2nd Tech |   | 1st Tech       |   | 2nd Tech |    |                                  |                                  |                                   |                                   |                      |                 |             |                |                                                                  |                                                     |                             |
| EXP | CON                                                                                                                                                                                         | EXP              | CON    | EXP   | CON      | EXP            | CON |          |   |                |   |          |    |                                  |                                  |                                   |                                   |                      |                 |             |                |                                                                  |                                                     |                             |
| 337 | <b>TREEEC</b> HFYAGGQVYPGEASR                                                                                                                                                               | 796.40           | 3      | 57.3  | Non-rafi | 2              | 0   | 1        | 0 | 0              | 0 | 0        | 3  | 0                                | 3                                | 0                                 |                                   |                      | H               | PRDX4       | IPI00011937    | Peroxiredoxin-4                                                  | 51                                                  |                             |
| 338 | GSDHTDVCGNVVGSVSSSSSSGGSDK                                                                                                                                                                  | 781.39           | 3      | 58.7  | Raft     | 1              | 0   | 0        | 0 | 0              | 0 | 0        | 1  | 0                                | 1                                | 0                                 |                                   |                      |                 | PROSAP1P    | IPI00028588    | Protein KIAA0552                                                 | 112                                                 |                             |
| 339 | <b>SLIC</b> SISNEVPEHP <b>C</b> VSPVSNHVYER                                                                                                                                                 | 1021.73          | 3      | 76.1  | Raft     | 4              | 1   | 3        | 0 | 3              | 1 | 2        | 12 | 2                                | 12                               | 2                                 | 6.00                              | 1.792                | 0.000           | PRPF19      | IPI00004968    | Pre-mRNA-processing factor 19                                    | 16                                                  |                             |
| 340 | <b>SLIC</b> SISNEVPEHP <b>C</b> VSPVSNHVYER                                                                                                                                                 | 1021.69          | 3      | 52.4  | Raft     | 0              | 1   | 0        | 1 | 1              | 0 | 1        | 2  | 3                                | 2                                | 3                                 | 0.67                              | -0.405               | 0.834           | PRPF19      | IPI00004968    | Pre-mRNA-processing factor 19                                    |                                                     |                             |
| 341 | <b>DA</b> CFDGGSG <b>PLA</b> C <b>NK</b>                                                                                                                                                    | 527.34           | 3      | 44.9  | Raft     | 0              | 1   | 0        | 0 | 0              | 0 | 0        | 0  | 1                                | 0                                | 1                                 |                                   |                      |                 | PRSS21      | IPI00218172    | Isoform 2 of Testisin precursor                                  |                                                     |                             |
| 342 | <b>MT</b> CTDQKSHSQ <b>R</b>                                                                                                                                                                | 360.12           | 4      | 46.5  | Non-rafi | 0              | 0   | 0        | 0 | 0              | 0 | 0        | 1  | 0                                | 1                                | 0                                 | 1                                 |                      |                 | PSORS1C1    | IPI00328126    | Isoform 1 of Psoriasis susceptibility 1 candidate gene 1 protein |                                                     |                             |
| 343 | GSDFLSTC <b>V</b> TNGPFISSSSASAANGNDSKK                                                                                                                                                     | 1079.95          | 3      | 101.1 | Raft     | 0              | 2   | 0        | 1 | 3              | 1 | 2        | 2  | 5                                | 6                                | 5                                 | 6                                 | 0.83                 | -0.182          | 0.694       | PTBP1          | IPI00179964                                                      | Isoform 1 of Polypyrimidine tract-binding protein 1 |                             |
| 344 | SVTRNVMTAILSL <b>P</b> GDIYLLSV <b>TAC</b> TER                                                                                                                                              | 1041.72          | 3      | 46.7  | Raft     | 0              | 1   | 0        | 0 | 0              | 0 | 0        | 0  | 0                                | 1                                | 0                                 | 1                                 |                      |                 | PTPRO       | IPI00001767    | receptor-type protein tyrosine phosphatase O isoform a precursor |                                                     |                             |
| 345 | ETPNTAGAGATGGHGGHAAHATAVAATGIL <b>C</b> RO <b>Q</b> R                                                                                                                                       | 924.32           | 4      | 45.1  | Raft     | 0              | 0   | 0        | 0 | 1              | 0 | 0        | 0  | 1                                | 0                                | 1                                 | 0                                 |                      |                 | PVRL2       | IPI00022661    | Isoform Delta of Poliovirus receptor-related protein 2 precursor | 382                                                 |                             |
| 346 | <b>D</b> CPEKILYSWG <b>L</b> L <b>G</b> K                                                                                                                                                   | 463.94           | 4      | 52.4  | Raft     | 0              | 0   | 1        | 0 | 0              | 0 | 0        | 1  | 0                                | 1                                | 0                                 |                                   |                      |                 | RABGAP1L    | IPI00396010    | RAB GTPase activating protein 1-like isoform A                   | 505                                                 |                             |
| 347 | QW <b>N</b> CAFL <b>S</b> SAK                                                                                                                                                               | 749.55           | 2      | 52.5  | Non-rafi | 0              | 2   | 0        | 0 | 0              | 0 | 0        | 0  | 2                                | 0                                | 2                                 |                                   |                      |                 | RAP1B       | IPI00015148    | Ras-related protein Rap-1b precursor                             |                                                     |                             |
| 348 | ALAE <b>E</b> W <b>S</b> CPFM <b>S</b> AK                                                                                                                                                   | 901.26           | 2      | 56.5  | Non-rafi | 1              | 0   | 0        | 0 | 0              | 0 | 0        | 1  | 0                                | 1                                | 0                                 |                                   |                      |                 | RAP2B       | IPI00018364    | Ras-related protein Rap-2b precursor                             | 140                                                 |                             |
| 349 | <b>ALA</b> QE <b>W</b> GC <b>P</b> FM <b>S</b> AK                                                                                                                                           | 884.82           | 2      | 77.8  | Non-rafi | 1              | 0   | 1        | 0 | 2              | 0 | 1        | 0  | 5                                | 0                                | 5                                 | 0                                 |                      | H               | RAP2C       | IPI00009607    | Ras-related protein Rap-2c precursor                             | 140                                                 |                             |
| 350 | MHL <b>P</b> GC <b>A</b> PAMADG <b>S</b> FLAG <b>L</b> L <b>R</b>                                                                                                                           | 597.43           | 4      | 45.8  | Raft     | 0              | 0   | 0        | 0 | 0              | 1 | 0        | 0  | 1                                | 0                                | 1                                 |                                   |                      |                 | RAX         | IPI00021025    | Retinal homeobox protein Rx                                      |                                                     |                             |
| 351 | NLEDQSSKAGDMGN <b>C</b> VSQ <b>Q</b> QEGGV <b>S</b> EEMK                                                                                                                                    | 786.56           | 4      | 44.4  | Non-rafi | 0              | 0   | 0        | 0 | 0              | 0 | 1        | 0  | 1                                | 0                                | 1                                 | 0                                 |                      |                 | RFTN1       | IPI00749454    | Raftlin                                                          | 494                                                 |                             |
| 352 | <b>C</b> VL <b>V</b> GD <b>S</b> AVG <b>K</b> T <b>S</b> LL <b>V</b> R                                                                                                                      | 430.45           | 4      | 45.8  | Non-rafi | 0              | 0   | 0        | 0 | 0              | 0 | 0        | 1  | 0                                | 1                                | 1                                 | 2                                 | 0.50                 | -0.693          | 0.942       | RHOH           | IPI00018882                                                      | Rho-related GTP-binding protein RhoH                |                             |
|     |                                                                                                                                                                                             | 430.29           | 4      | 47.1  | Raft     | 1              | 0   | 0        | 0 | 0              | 1 | 0        | 0  | 1                                | 1                                |                                   |                                   |                      |                 | RHOH        | IPI00018882    | Rho-related GTP-binding protein RhoH                             |                                                     |                             |
| 353 | <b>LLA</b> QE <b>A</b> VC <b>G</b> W <b>AL</b> PH <b>N</b> RM <b>Q</b> AL <b>T</b> SC <b>E</b> CT <b>C</b> PD <b>C</b> FR                                                                   | 982.66           | 4      | 47.8  | Non-rafi | 0              | 0   | 0        | 0 | 2              | 0 | 0        | 0  | 2                                | 0                                | 3                                 | 0                                 |                      |                 | H           | RNF31          | IPI00094740                                                      | Isoform 1 of RING finger protein 31                 | 702/717/<br>719/722/<br>725 |
|     |                                                                                                                                                                                             | 982.60           | 4      | 61.3  | Raft     | 0              | 0   | 1        | 0 | 0              | 0 | 0        | 0  | 1                                | 0                                |                                   |                                   |                      |                 | RNF31       | IPI00094740    | Isoform 1 of RING finger protein 31                              |                                                     |                             |
| 354 | LPP <b>Q</b> AL <b>Q</b> L <b>S</b> PC <b>S</b> SS <b>S</b> DL <b>C</b> SR                                                                                                                  | 576.74           | 4      | 49.3  | Non-rafi | 0              | 0   | 0        | 0 | 1              | 0 | 0        | 0  | 1                                | 0                                | 1                                 | 0                                 |                      |                 |             | ROBO4          | IPI00103871                                                      | Isoform 1 of Roundabout homolog 4 precursor         | 625                         |
| 355 | <b>AKV</b> DF <b>PL</b> C <b>G</b> H <b>M</b> V <b>S</b> DE <b>Y</b> EQ <b>S</b> SEALE <b>A</b> AR                                                                                          | 1076.16          | 3      | 131.6 | Raft     | 4              | 0   | 0        | 3 | 3              | 0 | 4        | 0  | 11                               | 3                                | 11                                | 3                                 | 3.67                 | 1.299           | 0.005       | RPL10          | IPI00554723                                                      | 60S ribosomal protein L10                           | 49                          |
| 356 | <b>F</b> SV <b>C</b> VL <b>G</b> D <b>Q</b> QH <b>C</b> DE <b>A</b> K                                                                                                                       | 952.76           | 2      | 69.0  | Raft     | 3              | 0   | 2        | 0 | 1              | 0 | 0        | 0  | 6                                | 0                                | 6                                 | 0                                 |                      | H               | RPL10A      | IPI00412579    | 60S ribosomal protein L10a                                       | 74                                                  |                             |
| 357 | <b>C</b> TG <b>EV</b> GV <b>G</b> AT <b>S</b> AL <b>AP</b> K                                                                                                                                | 681.46           | 2      | 77.1  | Raft     | 2              | 2   | 2        | 2 | 2              | 2 | 2        | 2  | 8                                | 8                                | 8                                 | 8                                 | 1.00                 | 0.000           | 0.551       | RPL12          | IPI00024933                                                      | 60S ribosomal protein L12                           |                             |
| 358 | <b>H</b> PH <b>DI</b> DD <b>I</b> NS <b>G</b> AV <b>E</b> CP <b>S</b> AS                                                                                                                    | 995.55           | 2      | 74.8  | Raft     | 3              | 0   | 4        | 0 | 4              | 0 | 3        | 0  | 14                               | 0                                | 14                                | 0                                 |                      | H               | RPL12       | IPI00024933    | 60S ribosomal protein L12                                        | 162                                                 |                             |
| 359 | V <b>V</b> Y <b>L</b> R <b>C</b> TG <b>EV</b> GV <b>G</b> AT <b>S</b> AL <b>AP</b> K                                                                                                        | 665.58           | 3      | 45.5  | Raft     | 0              | 0   | 0        | 0 | 0              | 1 | 0        | 0  | 0                                | 1                                | 0                                 | 1                                 |                      |                 | RPL12       | IPI00024933    | 60S ribosomal protein L12                                        |                                                     |                             |
| 360 | <b>G</b> CG <b>T</b> V <b>LL</b> SG <b>P</b> R                                                                                                                                              | 530.65           | 2      | 54.2  | Raft     | 1              | 1   | 0        | 0 | 1              | 0 | 0        | 0  | 2                                | 1                                | 2                                 | 1                                 | 2.00                 | 0.693           | 0.095       | RPL18          | IPI00215719                                                      | 60S ribosomal protein L18                           | 134                         |
| 361 | <b>E</b> Y <b>R</b> D <b>L</b> T <b>AG</b> AV <b>T</b> Q <b>C</b> Y <b>R</b>                                                                                                                | 616.79           | 3      | 67.5  | Raft     | 0              | 0   | 1        | 0 | 0              | 0 | 0        | 1  | 0                                | 2                                | 0                                 | 2                                 | 0                    |                 | M           | RPL18A         | IPI00026202                                                      | 60S ribosomal protein L18a                          | 109                         |
| 362 | TGV <b>H</b> HS <b>G</b> N <b>N</b> IEL <b>G</b> T <b>A</b> CG <b>K</b> Y <b>R</b>                                                                                                          | 611.40           | 4      | 47.5  | Raft     | 0              | 0   | 1        | 0 | 0              | 0 | 0        | 0  | 1                                | 0                                | 1                                 | 0                                 |                      |                 |             | RPL30          | IPI00219156                                                      | 60S ribosomal protein L30                           | 85                          |
| 363 | <b>V</b> CT <b>L</b> AID <b>PD</b> GD <b>S</b> DI <b>R</b>                                                                                                                                  | 851.14           | 2      | 79.9  | Raft     | 2              | 2   | 2        | 2 | 2              | 2 | 2        | 2  | 8                                | 8                                | 8                                 | 8                                 | 1.00                 | 0.000           | 0.551       | RPL30          | IPI00219156                                                      | 60S ribosomal protein L30                           |                             |
| 364 | <b>S</b> AC <b>G</b> V <b>C</b> PG <b>R</b>                                                                                                                                                 | 488.74           | 2      | 52.6  | Raft     | 0              | 0   | 1        | 0 | 0              | 0 | 1        | 0  | 2                                | 0                                | 2                                 | 0                                 |                      |                 | M           | RPL34          | IPI00219160                                                      | 60S ribosomal protein L34                           | 46                          |
| 365 | <b>A</b> C <b>A</b> R <b>PL</b> IS <b>V</b> SE <b>K</b> GE <b>S</b> SG <b>K</b>                                                                                                             | 675.69           | 3      | 74.5  | Raft     | 4              | 2   | 2        | 1 | 2              | 2 | 0        | 1  | 8                                | 6                                | 8                                 | 6                                 | 1.33                 | 0.288           | 0.320       | RPL4           | IPI00003918                                                      | 60S ribosomal protein L4                            |                             |
| 366 | <b>S</b> G <b>Q</b> GA <b>F</b> GN <b>M</b> C <b>R</b>                                                                                                                                      | 564.13           | 2      | 56.2  | Raft     | 2              | 0   | 1        | 0 | 2              | 1 | 1        | 1  | 6                                | 2                                | 6                                 | 2                                 | 3.00                 | 1.099           | 0.016       | RPL4           | IPI00003918                                                      | 60S ribosomal protein L4                            | 96                          |
| 367 | <b>A</b> QL <b>N</b> IGN <b>V</b> LP <b>V</b> GT <b>M</b> PE <b>G</b> TI <b>V</b> C <b>LE</b> E <b>K</b> PG <b>D</b> RG <b>K</b>                                                            | 867.04           | 4      | 46.5  | Raft     | 1              | 0   | 0        | 0 | 1              | 0 | 0        | 0  | 2                                | 0                                | 2                                 | 0                                 |                      | M               | RPL8        | IPI00012772    | 60S ribosomal protein L8                                         | 114                                                 |                             |
| 368 | <b>A</b> QL <b>N</b> IGN <b>V</b> LP <b>V</b> GT <b>M</b> PE <b>G</b> TI <b>V</b> C <b>LE</b> E <b>K</b> PG <b>D</b> RG <b>K</b>                                                            | 1155.52          | 3      | 62.9  | Raft     | 1              | 0   | 0        | 0 | 0              | 0 | 0        | 0  | 1                                | 0                                | 1                                 | 0                                 |                      |                 |             | RPL8           | IPI00012772                                                      | 60S ribosomal protein L8                            | 115                         |
| 369 | <b>A</b> GAI <b>A</b> PC <b>EV</b> TV <b>P</b> A <b>Q</b> NT <b>GL</b> G <b>PE</b> K                                                                                                        | 1140.48          | 3      | 48.1  | Non-rafi | 0              | 1   | 0        | 0 | 0              | 0 | 0        | 0  | 0                                | 1                                | 18                                | 3                                 | 6.00                 | 1.792           | 0.000       | RPLP0          | IPI00008530                                                      | 60S acidic ribosomal protein P0                     | 119                         |
|     |                                                                                                                                                                                             | 1062.85          | 2      | 90.5  | Raft     | 6              | 1   | 5        | 1 | 4              | 0 | 3        | 0  | 18                               | 2                                |                                   |                                   |                      |                 | RPLP0       | IPI00008530    | 60S acidic ribosomal protein P0                                  |                                                     |                             |
| 370 | <b>A</b> L <b>A</b> N <b>V</b> N <b>I</b> GS <b>L</b> C <b>V</b> NG <b>A</b> GG <b>P</b> A <b>A</b> GA <b>A</b> AG <b>P</b> AG <b>P</b> A <b>P</b> STA<br>AA <b>P</b> A <b>E</b> E <b>K</b> | 939.43           | 4      | 81.9  | Raft     | 1              | 0   | 1        | 0 | 2              | 0 | 1        | 0  | 5                                | 0                                | 5                                 | 0                                 |                      | H               | RPLP1       | IPI00008527    | 60S acidic ribosomal protein P1                                  | 61                                                  |                             |
| 371 | <b>K</b> L <b>L</b> M <b>M</b> A <b>G</b> I <b>D</b> D <b>C</b> Y <b>S</b> A <b>R</b>                                                                                                       | 894.63           | 2      | 86.6  | Raft     | 4              | 0   | 1        | 0 | 1              | 0 | 2        | 0  | 8                                | 0                                | 8                                 | 0                                 |                      | H               | RPS2        | IPI00013485    | 40S ribosomal protein S2                                         | 222                                                 |                             |
| 372 | <b>C</b> CL <b>T</b> Y <b>C</b> FN <b>K</b> PED <b>K</b>                                                                                                                                    | 907.57           | 2      | 48.6  | Raft     | 0              | 2   | 0        | 2 | 1              | 0 | 0        | 0  | 1                                | 4                                | 1                                 | 4                                 | 0.25                 | -1.386          | 0.999       | RPS27A         | IPI00179330                                                      | ubiquitin and ribosomal protein S27a precursor      |                             |
| 373 | <b>E</b> CP <b>S</b> DE <b>C</b> G <b>A</b> GV <b>F</b> M <b>A</b> SH <b>F</b> DR                                                                                                           | 1092.74          | 2      | 47.7  | Raft     | 0              | 0   | 0        | 0 | 1              | 0 | 0        | 0  | 1                                | 0                                | 1                                 | 0                                 |                      |                 |             | RPS27A         | IPI00179330                                                      | ubiquitin and ribosomal protein S27a precursor      | 126                         |
| 374 | T <b>G</b> S <b>Q</b> Q <b>C</b> T <b>Q</b> V <b>R</b> VE <b>F</b> MD <b>D</b> T <b>S</b> R                                                                                                 | 749.24           | 3      | 49.7  | Non-rafi | 0              | 0   | 1        | 0 | 0              | 0 | 0        | 0  | 1                                | 0                                | 13                                | 10                                | 1.30                 | 0.262           | 0.339       | RPS28          | IPI00719622                                                      | 40S ribosomal protein S28                           |                             |
|     |                                                                                                                                                                                             | 749.53           | 3      | 86.5  | Raft     | 3              | 6   | 2        | 1 | 4              | 2 | 3        | 1  | 12                               | 10                               |                                   |                                   |                      |                 | RPS28       | IPI00719622    | 40S ribosomal protein S28                                        |                                                     |                             |
| 375 | <b>M</b> K <b>L</b> NIS <b>F</b> AT <b>G</b> C <b>Q</b> K                                                                                                                                   | 769.64           | 2      | 91.0  | Raft     | 2              | 2   | 3        | 2 | 2              | 2 | 2        | 0  | 9                                | 6                                | 9                                 | 6                                 | 1.50                 | 0.405           | 0.238       | RPS6           | IPI00021840                                                      | 40S ribosomal protein S6                            | 12                          |
| 376 | <b>Y</b> VD <b>I</b> AI <b>P</b> C <b>N</b> NK                                                                                                                                              | 625.55           | 2      | 46.9  | Raft     | 0              | 0   | 0        | 0 | 1              | 0 | 0        | 0  | 1                                | 0                                | 1                                 | 0                                 |                      |                 |             | RPSA           | IPI00553164                                                      | 40S ribosomal protein SA                            | 163                         |
| 377 | LL <b>V</b> VT <b>D</b> PR <b>A</b> D <b>H</b> Q <b>L</b> TE <b>A</b> SY <b>V</b> N <b>L</b> PT <b>I</b> AL <b>C</b> NT <b>D</b> S <b>P</b> L <b>R</b>                                      | 1279.00          | 3      | 113.9 | Raft     | 4              | 1   | 2        | 2 | 1              | 0 | 2        | 1  | 9                                | 4                                | 9                                 | 4                                 | 2.25                 | 0.811           | 0.060       | RPSA           | IPI00553164                                                      | 40S ribosomal protein SA                            | 148                         |
| 378 | <b>F</b> CH <b>Q</b> LD <b>F</b> ST <b>S</b> G <b>A</b> L <b>C</b> VAL <b>N</b> K                                                                                                           | 545.94           | 4      | 56.3  | Non-rafi | 0              | 0   | 0        | 0 | 1              | 0 | 0        | 0  | 1                                | 0                                | 1                                 | 0                                 |                      |                 |             | RPUSD1         | IPI00016510                                                      | RNA pseudouridylate synthase domain containing 1    | 85                          |
| 379 | <b>Q</b> KL <b>T</b> A <b>E</b> FE <b>A</b> EQ <b>T</b> S <b>A</b> C <b>R</b>                                                                                                               | 605.04           | 3      | 45.5  | Raft     | 0              | 0   | 0        | 0 | 1              | 0 | 0        | 0  | 1                                | 0                                | 1                                 | 0                                 |                      |                 |             | RRBP1          | IPI00215743                                                      | Isoform 3 of Ribosome-binding protein 1             | 1323                        |
| 380 | <b>S</b> K <b>C</b> E <b>L</b> S <b>G</b> L <b>H</b> Q <b>L</b> Q <b>E</b> A <b>R</b>                                                                                                       | 629.25           | 3      | 49.9  | Raft     | 1              | 0   | 0        | 0 | 0              | 0 | 0        | 0  | 1                                | 0                                | 1                                 | 0                                 |                      |                 |             | RRBP1          | IPI00215743                                                      | Isoform 3 of Ribosome-binding protein 1             | 933                         |

| No. | Sequence                                      | Precursor m/z | Charge | Score | Fraction | Replicate      |     |          |     |                |     |          |     | Total EXP Each Fraction | Total CON Each Fraction | Total EXP Both Fractions | Total CON Both Fractions | EXP/CON Ratio | Ln(EXP/CON) | P-value | Gene Symbol | Acc.Number  | Description                                                       | Site           |
|-----|-----------------------------------------------|---------------|--------|-------|----------|----------------|-----|----------|-----|----------------|-----|----------|-----|-------------------------|-------------------------|--------------------------|--------------------------|---------------|-------------|---------|-------------|-------------|-------------------------------------------------------------------|----------------|
|     |                                               |               |        |       |          | 1st Biological |     |          |     | 2nd Biological |     |          |     |                         |                         |                          |                          |               |             |         |             |             |                                                                   |                |
|     |                                               |               |        |       |          | 1st Tech       |     | 2nd Tech |     | 1st Tech       |     | 2nd Tech |     |                         |                         |                          |                          |               |             |         |             |             |                                                                   |                |
|     |                                               |               |        |       |          | EXP            | CON | EXP      | CON | EXP            | CON | EXP      | CON |                         |                         |                          |                          |               |             |         |             |             |                                                                   |                |
| 381 | AEPSAATQSHSISSSSFGAEPSPAPGGGGSPGACPALG TK     | 1186.10       | 3      | 111.9 | Non-raft | 2              | 0   | 0        | 1   | 1              | 0   | 2        | 0   | 5                       | 1                       | 5                        | 1                        | 5.00          | 1.609       | 0.001   | RTN3        | IPI00028946 | Reticulon-3                                                       | 34             |
| 382 | FVQC PDGELQK                                  | 632.55        | 2      | 60.2  | Raft     | 1              | 0   | 0        | 0   | 1              | 0   | 1        | 0   | 3                       | 0                       | 3                        | 0                        |               |             | H       | RUVBL2      | IPI00009104 | RuvB-like 2                                                       | 227            |
| 383 | METWSVEVQC SWLVEK                             | 652.17        | 3      | 47.9  | Non-raft | 0              | 0   | 0        | 1   | 0              | 0   | 0        | 0   | 0                       | 1                       | 0                        | 1                        |               |             |         | SAMD3       | IPI00184090 | CDNA FLJ34563 fis, clone KIDNE2002798                             |                |
| 384 | HCSLQAVPEEIYR                                 | 773.12        | 2      | 45.9  | Raft     | 1              | 0   | 0        | 0   | 0              | 0   | 0        | 0   | 1                       | 0                       | 1                        | 0                        |               |             |         | SCRIB       | IPI00410666 | Isoform 3 of Protein LAP4                                         | 22             |
| 385 | MLKC IPLWR                                    | 601.54        | 2      | 49.0  | Non-raft | 1              | 0   | 0        | 0   | 0              | 0   | 0        | 0   | 1                       | 0                       | 5                        | 0                        |               |             | H       | SCRIB       | IPI00410666 | Isoform 3 of Protein LAP4                                         | 4              |
|     |                                               | 601.51        | 2      | 64.4  | Raft     | 1              | 0   | 1        | 0   | 1              | 0   | 1        | 0   | 4                       | 0                       |                          |                          |               |             |         | SCRIB       | IPI00410666 | Isoform 3 of Protein LAP4                                         |                |
| 386 | SQEATEAAPSCVGDMDATPR                          | 1018.56       | 2      | 112.3 | Non-raft | 2              | 4   | 1        | 4   | 3              | 0   | 3        | 0   | 9                       | 8                       | 26                       | 16                       | 1.63          | 0.486       | 0.190   | SEPT9       | IPI00455033 | Isoform 3 of Septin-9                                             | 84             |
|     |                                               | 1019.18       | 2      | 128.6 | Raft     | 5              | 3   | 6        | 5   | 2              | 0   | 4        | 0   | 17                      | 8                       |                          |                          |               |             |         | SEPT9       | IPI00455033 | Isoform 3 of Septin-9                                             |                |
| 387 | DMHCL EASSPTFSKPEPMK                          | 1027.93       | 2      | 44.7  | Non-raft | 0              | 0   | 0        | 0   | 0              | 0   | 1        | 0   | 1                       | 0                       | 1                        | 0                        |               |             |         | SETX        | IPI00142538 | Isoform 1 of Probable helicase senataxin                          | 637            |
| 388 | SPAESAAGLTC LPSVTR                            | 866.64        | 2      | 111.7 | Non-raft | 2              | 0   | 2        | 0   | 0              | 0   | 0        | 0   | 4                       | 0                       | 4                        | 0                        |               |             | H       | SFT2D3      | IPI00166444 | Vesicle transport protein SFT2C                                   | 67             |
| 389 | YKVQSVETVTEGCTHEVALPAEEDYLP LKPR              | 1113.51       | 3      | 109.1 | Raft     | 3              | 2   | 4        | 1   | 3              | 0   | 4        | 0   | 14                      | 3                       | 14                       | 3                        | 4.67          | 1.540       |         | SKIV2L2     | IPI00647217 | Superkiller viralicidic activity 2-like 2                         | 110            |
| 390 | GLAAAEP TANGGLALASIEDQGAAGGY CGSRDQV R        | 1140.28       | 3      | 176.5 | Non-raft | 6              | 0   | 7        | 0   | 4              | 0   | 4        | 0   | 21                      | 0                       | 21                       | 0                        |               |             | H       | SLC1A5      | IPI00019472 | Neutral amino acid transporter B(0)                               | 39             |
| 391 | SSPGMAPSACC CSP AALQR                         | 947.55        | 2      | 77.9  | Non-raft | 3              | 0   | 2        | 0   | 3              | 0   | 3        | 0   | 11                      | 0                       | 11                       | 0                        |               |             | H       | SLC26A11    | IPI00410334 | Sulfate/anion exchanger                                           | 23/24/25       |
| 392 | ACVFGNEPKASDEVPLAPR                           | 1001.13       | 2      | 86.8  | Non-raft | 3              | 0   | 1        | 0   | 0              | 0   | 0        | 0   | 4                       | 0                       | 4                        | 0                        |               |             | H       | SLC35B2     | IPI00384867 | Isoform 2 of Adenosine 3'-phospho 5'-phosphosulfate transporter 1 | 80             |
| 393 | GLCFPLVK                                      | 438.60        | 2      | 49.2  | Non-raft | 1              | 0   | 1        | 0   | 0              | 0   | 0        | 0   | 2                       | 0                       | 2                        | 0                        |               |             | M       | SLC35B2     | IPI00384867 | Isoform 2 of Adenosine 3'-phospho 5'-phosphosulfate transporter 1 | 73             |
| 394 | SLNPATYV PVLKLLSLLPLSC QK                     | 870.73        | 3      | 84.6  | Non-raft | 2              | 0   | 1        | 0   | 2              | 0   | 1        | 0   | 6                       | 0                       | 6                        | 0                        |               |             | H       | SLC5A6      | IPI00031822 | Sodium-dependent multivitamin transporter                         | 577            |
| 395 | GCKVLLNIGQMLR                                 | 808.44        | 2      | 91.6  | Non-raft | 4              | 0   | 2        | 0   | 2              | 0   | 1        | 0   | 9                       | 0                       | 9                        | 0                        |               |             | H       | SLC7A1      | IPI00027728 | High-affinity cationic amino acid transporter 1                   | 3              |
| 396 | TLTELNKCCGLCVC PCNR                           | 985.76        | 2      | 92.2  | Non-raft | 2              | 0   | 0        | 0   | 2              | 0   | 2        | 0   | 6                       | 0                       | 18                       | 0                        |               |             | H       | SNAP23      | IPI00010438 | Isoform SNAP-23a of Synaptosomal-associated protein 23            | 79/80/83/85/87 |
|     |                                               | 985.76        | 2      | 105.4 | Raft     | 3              | 0   | 2        | 0   | 3              | 0   | 4        | 0   | 12                      | 0                       |                          |                          |               |             |         | SNAP23      | IPI00010438 | Isoform SNAP-23a of Synaptosomal-associated protein 23            |                |
| 397 | TTWGDGGENSPCNVSK                              | 876.12        | 2      | 89.2  | Non-raft | 1              | 0   | 1        | 0   | 0              | 0   | 0        | 0   | 2                       | 0                       | 17                       | 0                        |               |             | H       | SNAP23      | IPI00010438 | Isoform SNAP-23a of Synaptosomal-associated protein 23            | 112            |
|     |                                               | 876.74        | 2      | 91.4  | Raft     | 4              | 0   | 5        | 0   | 3              | 0   | 3        | 0   | 15                      | 0                       |                          |                          |               |             |         | SNAP23      | IPI00010438 | Isoform SNAP-23a of Synaptosomal-associated protein 23            |                |
| 398 | ANNPEQNLSECEEQAK                              | 980.66        | 2      | 68.0  | Raft     | 2              | 2   | 1        | 1   | 2              | 0   | 0        | 0   | 5                       | 3                       | 5                        | 3                        | 1.67          | 0.511       | 0.176   | SND1        | IPI00140420 | Staphylococcal vacuole domain-containing protein 1                | 152            |
| 399 | VQFQDMCATIGVDPLASGK                           | 666.89        | 3      | 45.7  | Raft     | 0              | 0   | 1        | 0   | 0              | 0   | 0        | 0   | 1                       | 0                       | 1                        | 0                        |               |             |         | SNF8        | IPI00101524 | Isoform 1 of Vacuolar sorting protein SNF8                        | 72             |
| 400 | SIGVPKIVLHAEAGHIVTCTETNGEVYR                  | 1032.25       | 3      | 61.4  | Raft     | 1              | 0   | 1        | 1   | 3              | 0   | 2        | 0   | 7                       | 1                       | 7                        | 1                        | 7.00          | 1.946       | 0.000   | SNRPD3      | IPI00017964 | Small nuclear ribonucleoprotein Sm D3                             | 10             |
| 401 | NGGGGGGSGLHCAGNGGGGGGR                        | 496.18        | 4      | 44.5  | Raft     | 0              | 0   | 1        | 0   | 0              | 0   | 0        | 0   | 1                       | 0                       | 1                        | 0                        |               |             |         | SNX27       | IPI00640980 | sorting nexin family member 27                                    | 30             |
| 402 | STCPSAAPSASAPAMTTVENK                         | 1011.01       | 2      | 46.7  | Raft     | 1              | 0   | 0        | 0   | 0              | 0   | 0        | 0   | 1                       | 0                       | 1                        | 0                        |               |             |         | SPECC1L     | IPI00178072 | cytospin-A                                                        | 79             |
| 403 | CGCAGCGGRHEEAR                                | 492.81        | 3      | 47.1  | Raft     | 0              | 0   | 0        | 0   | 0              | 0   | 0        | 1   | 0                       | 1                       | 0                        | 1                        |               |             |         | SPRED3      | IPI00397716 | Sprouty-related, EVH1 domain-containing protein 3                 |                |
| 404 | NMVHPNVICDGCNGPVVGVTR                         | 1104.10       | 2      | 55.7  | Non-raft | 2              | 0   | 1        | 0   | 0              | 0   | 0        | 0   | 3                       | 0                       | 6                        | 3                        | 2.00          | 0.693       | 0.095   | SQSTM1      | IPI00179473 | 48 kDa protein                                                    | 127            |
|     |                                               | 1104.78       | 2      | 83.8  | Raft     | 1              | 1   | 0        | 1   | 2              | 0   | 0        | 1   | 3                       | 3                       |                          |                          |               |             |         | SQSTM1      | IPI00179473 | 48 kDa protein                                                    |                |
| 405 | NMVHPNVICDGCNGPVVGVTR                         | 736.51        | 3      | 58.7  | Non-raft | 1              | 0   | 1        | 1   | 0              | 0   | 0        | 0   | 2                       | 1                       | 9                        | 3                        | 3.00          | 1.099       | 0.016   | SQSTM1      | IPI00179473 | 48 kDa protein                                                    | 131            |
|     |                                               | 737.27        | 3      | 86.2  | Raft     | 2              | 1   | 2        | 1   | 1              | 0   | 2        | 0   | 7                       | 2                       |                          |                          |               |             |         | SQSTM1      | IPI00179473 | 48 kDa protein                                                    |                |
| 406 | SSSQPSSCCSDPSKPGGVNEGATQSLAEQMR               | 1084.37       | 3      | 57.9  | Non-raft | 2              | 0   | 0        | 1   | 0              | 0   | 0        | 0   | 2                       | 1                       | 9                        | 7                        | 1.29          | 0.251       | 0.347   | SQSTM1      | IPI00179473 | 48 kDa protein                                                    |                |
|     |                                               | 1085.08       | 3      | 94.3  | Raft     | 1              | 2   | 2        | 1   | 2              | 2   | 2        | 1   | 7                       | 6                       |                          |                          |               |             |         | SQSTM1      | IPI00179473 | 48 kDa protein                                                    |                |
| 407 | SSSQPSSCCSDPSKPGGVNEGATQSLAEQMR               | 1084.41       | 3      | 49.2  | Non-raft | 0              | 2   | 0        | 1   | 0              | 0   | 0        | 0   | 0                       | 3                       | 1                        | 4                        | 0.25          | -1.386      | 0.999   | SQSTM1      | IPI00179473 | 48 kDa protein                                                    |                |
|     |                                               | 1084.77       | 3      | 79.2  | Raft     | 1              | 0   | 0        | 0   | 0              | 0   | 0        | 1   | 1                       | 1                       |                          |                          |               |             |         | SQSTM1      | IPI00179473 | 48 kDa protein                                                    |                |
| 408 | FPNGTASSPSSPSPPSGCGEGGSGRPGGAGAADGMEEPGR      | 1269.19       | 3      | 47.4  | Non-raft | 0              | 0   | 0        | 0   | 0              | 0   | 1        | 0   | 1                       | 0                       | 1                        | 0                        |               |             |         | SSTR1       | IPI00027804 | Somatostatin receptor type 1                                      | 21             |
| 409 | ALDLLSSCKEAADGYQR                             | 921.76        | 2      | 55.1  | Non-raft | 0              | 1   | 0        | 0   | 0              | 0   | 0        | 0   | 0                       | 1                       | 0                        | 1                        |               |             |         | STIP1       | IPI00013894 | Stress-induced-phosphoprotein 1                                   |                |
| 410 | WL CVGCEGGALGRR                               | 535.96        | 3      | 47.7  | Raft     | 0              | 0   | 0        | 0   | 0              | 0   | 1        | 0   | 1                       | 0                       | 1                        | 0                        |               |             |         | STK11IP     | IPI00885068 | Isoform 2 of serine/threonine kinase 11-interacting protein       | 734/738        |
| 411 | LQDGCN NNLTHTCTRGCSS                          | 566.52        | 4      | 46.9  | Non-raft | 0              | 0   | 0        | 0   | 0              | 1   | 0        | 0   | 0                       | 1                       | 0                        | 1                        |               |             |         | STK32B      | IPI00293334 | Isoform 1 of Serine/threonine-protein kinase 32B                  |                |
| 412 | GPGLFILPCTDSFIK                               | 878.20        | 2      | 62.2  | Non-raft | 1              | 0   | 2        | 0   | 0              | 0   | 0        | 0   | 3                       | 0                       | 14                       | 0                        |               |             | H       | STOM        | IPI00219682 | Erythrocyte band 7 integral membrane protein                      | 87             |
|     |                                               | 878.07        | 2      | 79.7  | Raft     | 4              | 0   | 3        | 0   | 2              | 0   | 2        | 0   | 11                      | 0                       |                          |                          |               |             |         | STOM        | IPI00219682 | Erythrocyte band 7 integral membrane protein                      |                |
| 413 | GGNDT C FLEGLLGPLLSPPLGPSPLCTPGPFLLGMLS QLP R | 1130.25       | 4      | 54.5  | Raft     | 1              | 0   | 0        | 0   | 0              | 0   | 0        | 0   | 1                       | 0                       | 1                        | 0                        |               |             |         | STRC        | IPI00170605 | Stereocilin precursor                                             | 568/590        |
| 414 | KPPGSGRWLG AAGTATLPSSLC PGVQASR               | 980.10        | 3      | 46.7  | Non-raft | 1              | 0   | 0        | 0   | 0              | 0   | 0        | 0   | 1                       | 0                       | 1                        | 0                        |               |             |         | TACC2       | IPI00743514 | Similar to Transforming acidic coiled-coil-containing protein 2   | 82             |
| 415 | WASGLTPAQNCP R                                | 701.75        | 2      | 45.5  | Raft     | 1              | 0   | 0        | 0   | 0              | 0   | 0        | 0   | 1                       | 0                       | 1                        | 0                        |               |             |         | TAPBP       | IPI00007327 | Isoform 1 of Tapasin precursor                                    | 115            |

| No. | Sequence                                       | Precursor m/z | Charge | Score | Fraction | Replicate      |     |          |     |                |     |          |     | Total EXP Each Fraction | Total CON Each Fraction | Total EXP Both Fractions | Total CON Both Fractions | EXP/CON Ratio | Ln(EXP/CON) | P-value  | Gene Symbol | Acc.Number                                                                                           | Description                              | Site |
|-----|------------------------------------------------|---------------|--------|-------|----------|----------------|-----|----------|-----|----------------|-----|----------|-----|-------------------------|-------------------------|--------------------------|--------------------------|---------------|-------------|----------|-------------|------------------------------------------------------------------------------------------------------|------------------------------------------|------|
|     |                                                |               |        |       |          | 1st Biological |     |          |     | 2nd Biological |     |          |     |                         |                         |                          |                          |               |             |          |             |                                                                                                      |                                          |      |
|     |                                                |               |        |       |          | 1st Tech       |     | 2nd Tech |     | 1st Tech       |     | 2nd Tech |     |                         |                         |                          |                          |               |             |          |             |                                                                                                      |                                          |      |
|     |                                                |               |        |       |          | EXP            | CON | EXP      | CON | EXP            | CON | EXP      | CON |                         |                         |                          |                          |               |             |          |             |                                                                                                      |                                          |      |
| 416 | LDGHTSCLTWTPFNK                                | 574.34        | 3      | 46.3  | Raft     | 0              | 0   | 0        | 0   | 1              | 0   | 0        | 0   | 1                       | 0                       | 1                        | 0                        |               |             | TBC1D9B  | IP100307257 | TBc1 domain family, member 9B (with GRAM domain) isoform a                                           | 308                                      |      |
| 417 | TGGTTDLDFQCSKCK                                | 429.91        | 4      | 52.5  | Non-raft | 0              | 0   | 0        | 1   | 0              | 0   | 0        | 0   | 0                       | 1                       | 0                        | 1                        |               |             | TCEA3    | IP100178146 | Transcription elongation factor A protein 3                                                          |                                          |      |
| 418 | NGTCCIALDLGLAVRHDSATDTIDIAPNHR                 | 1017.31       | 3      | 50.2  | Raft     | 0              | 0   | 0        | 1   | 0              | 0   | 0        | 0   | 0                       | 1                       | 0                        | 1                        |               |             | TGFBF1   | IP100005733 | TGF-beta receptor type-1 precursor                                                                   |                                          |      |
| 419 | MPPPPPLSLRLGLQAPHQPGQPGFK                      | 898.38        | 3      | 47.5  | Non-raft | 0              | 1   | 0        | 0   | 0              | 0   | 0        | 0   | 0                       | 1                       | 0                        | 1                        |               |             | TLE3     | IP100221206 | Isoform 4 of Transducin-like enhancer protein 3                                                      |                                          |      |
| 420 | GCCSQSDFGTTSLK                                 | 359.56        | 4      | 45.1  | Raft     | 0              | 0   | 0        | 0   | 0              | 0   | 0        | 1   | 0                       | 1                       | 0                        | 1                        |               |             | TLR4     | IP100008673 | Toll-like receptor 4 precursor                                                                       |                                          |      |
| 421 | SALCFVVAVGLVAGCGAGGVALLSTTSSR                  | 667.61        | 4      | 45.4  | Non-raft | 0              | 0   | 0        | 0   | 1              | 0   | 0        | 0   | 1                       | 0                       | 1                        | 0                        |               |             | TMEM125  | IP100059631 | Transmembrane protein 125                                                                            | 37                                       |      |
| 422 | GGAALLCLSALLAHASGR                             | 560.93        | 3      | 47.1  | Raft     | 0              | 0   | 0        | 0   | 0              | 0   | 0        | 1   | 0                       | 1                       | 0                        | 1                        |               |             | TMEM132E | IP100413912 | Hypothetical protein                                                                                 |                                          |      |
| 423 | SMATYILKDFNACK                                 | 803.01        | 2      | 46.7  | Non-raft | 0              | 0   | 1        | 0   | 0              | 0   | 0        | 0   | 1                       | 0                       | 1                        | 0                        |               |             | TMEM63A  | IP100006006 | Transmembrane protein 63A                                                                            | 379                                      |      |
| 424 | GCEQVEAIEYYTKLEQK                              | 1016.27       | 2      | 53.1  | Raft     | 0              | 0   | 1        | 0   | 0              | 0   | 0        | 0   | 1                       | 0                       | 1                        | 0                        |               |             | TMEM63B  | IP100514538 | transmembrane protein 63B                                                                            | 327                                      |      |
| 425 | EAALPILEPVLGQEQPAAPDQPCVLFADAPEPGQALPVEEAVTLAR | 1223.72       | 4      | 48.8  | Raft     | 1              | 0   | 1        | 0   | 0              | 0   | 0        | 0   | 2                       | 0                       | 2                        | 0                        |               | M           | TNKS1BP1 | IP100304589 | 182 kDa tyankase 1-binding protein                                                                   | 631                                      |      |
| 426 | CTKEEHLCTQR                                    | 737.16        | 2      | 62.7  | Non-raft | 2              | 0   | 1        | 0   | 1              | 0   | 1        | 0   | 5                       | 0                       | 8                        | 3                        | 2.67          | 0.981       | 0.028    | TPM3        | IP100178083                                                                                          | 29 kDa protein                           | 209  |
|     |                                                | 737.07        | 2      | 75.3  | Raft     | 1              | 2   | 2        | 1   | 0              | 0   | 0        | 0   | 3                       | 3                       |                          |                          |               |             | TPM3     | IP100178083 | 29 kDa protein                                                                                       |                                          |      |
| 427 | ESQSLGGQSCAGEPDEELVGAFFIVR                     | 735.16        | 4      | 45.9  | Raft     | 0              | 0   | 0        | 0   | 1              | 0   | 0        | 0   | 1                       | 0                       | 1                        | 0                        |               |             | TRAIP    | IP100306611 | TRAF-interacting protein                                                                             | 373                                      |      |
| 428 | NQSLPVMIGSFAAPVCTSSPKMGLVK                     | 898.97        | 3      | 45.2  | Raft     | 0              | 0   | 0        | 0   | 0              | 0   | 1        | 0   | 1                       | 0                       | 1                        | 0                        |               |             | TRAK2    | IP100297257 | Trafficking kinesin-binding protein 2                                                                | 902                                      |      |
| 429 | MQSLSEAPNSDSLAPKPSNSASDCTASTTELK               | 1119.37       | 3      | 43.5  | Raft     | 0              | 0   | 0        | 0   | 0              | 1   | 0        | 0   | 0                       | 1                       | 0                        | 1                        |               |             | TSHZ2    | IP100032988 | Teashirt homolog 2                                                                                   |                                          |      |
| 430 | GCSLGSVLLSPTSTAPATSSSTVTAK                     | 632.46        | 4      | 53.8  | Non-raft | 1              | 0   | 0        | 0   | 0              | 0   | 0        | 0   | 1                       | 0                       | 1                        | 0                        |               |             | TSHZ3    | IP100001743 | Teashirt homolog 3                                                                                   | 801                                      |      |
| 431 | VADEALKVDDCDCHPEFSPSPSQPK                      | 734.98        | 4      | 47.9  | Raft     | 1              | 0   | 0        | 0   | 0              | 0   | 0        | 0   | 1                       | 0                       | 1                        | 0                        |               |             | TTC3     | IP100023977 | Isoform TRPDI of Tetratricopeptide repeat protein 3                                                  | 422                                      |      |
| 432 | MICQLYISKPHIDGFK                               | 515.37        | 4      | 45.6  | Raft     | 0              | 0   | 0        | 0   | 0              | 1   | 0        | 0   | 0                       | 1                       | 0                        | 1                        |               |             | TLL6     | IP100297940 | cDNA FLJ40073 fis, clone TESTI2000272.                                                               |                                          |      |
| 433 | AYHEQLSVAEITNACFEPANQMVK                       | 898.88        | 3      | 59.4  | Non-raft | 0              | 0   | 0        | 1   | 0              | 0   | 1        | 0   | 1                       | 1                       | 4                        | 1                        | 4.00          | 1.386       | 0.003    | TUBA4A      | IP100007750                                                                                          | Tubulin alpha-1 chain                    | 295  |
|     |                                                | 898.89        | 3      | 57.4  | Raft     | 1              | 0   | 1        | 0   | 1              | 0   | 0        | 0   | 3                       | 0                       |                          |                          |               |             | TUBA4A   | IP100007750 | Tubulin alpha-1 chain                                                                                |                                          |      |
| 434 | SIQFVDWCPTGFK                                  | 1112.74       | 3      | 62.9  | Non-raft | 2              | 1   | 0        | 0   | 0              | 0   | 0        | 0   | 2                       | 1                       | 2                        | 2                        | 1.00          | 0.000       | 0.551    | TUBA4A      | IP100007750                                                                                          | Tubulin alpha-1 chain                    |      |
|     |                                                | 765.08        | 2      | 47.5  | Raft     | 0              | 1   | 0        | 0   | 0              | 0   | 0        | 0   | 0                       | 1                       |                          |                          |               |             | TUBA4A   | IP100007750 | Tubulin alpha-1 chain                                                                                |                                          |      |
| 435 | MREIVHIQAGCQGNQIGAK                            | 690.78        | 3      | 97.0  | Non-raft | 4              | 3   | 6        | 4   | 3              | 0   | 1        | 0   | 14                      | 7                       | 15                       | 10                       | 1.50          | 0.405       | 0.238    | TUBB2C      | IP100007752                                                                                          | Tubulin beta-2C chain                    | 12   |
|     |                                                | 685.61        | 3      | 80.5  | Raft     | 0              | 2   | 1        | 1   | 0              | 0   | 0        | 0   | 1                       | 3                       |                          |                          |               |             | TUBB2C   | IP100007752 | Tubulin beta-2c chain                                                                                |                                          |      |
| 436 | NMMAACDPR                                      | 505.02        | 2      | 52.2  | Raft     | 0              | 0   | 0        | 0   | 1              | 0   | 0        | 0   | 1                       | 0                       | 1                        | 0                        |               |             | TUBB2C   | IP100007752 | Tubulin beta-2c chain                                                                                | 303                                      |      |
| 437 | VTEAPCYPGAPSTEASGQTGPQEPTSARA                  | 954.57        | 3      | 64.0  | Raft     | 0              | 0   | 0        | 0   | 1              | 0   | 0        | 0   | 1                       | 0                       | 1                        | 0                        |               |             | TXLNA    | IP100470779 | Alpha-taxilin                                                                                        | 523                                      |      |
| 438 | LRCGGTAEELDV                                   | 688.50        | 2      | 55.8  | Non-raft | 1              | 0   | 1        | 0   | 0              | 0   | 1        | 0   | 3                       | 0                       | 3                        | 0                        |               | H           | UGCG     | IP100003861 | Ceramide glucosyltransferase                                                                         | 384                                      |      |
| 439 | AASNAAAAAAGLDFAFGLPCAPR                        | 719.13        | 3      | 49.9  | Non-raft | 0              | 0   | 0        | 1   | 0              | 0   | 0        | 0   | 0                       | 1                       | 0                        | 1                        |               |             | UNCX     | IP100248578 | PREDICTED: similar to Unc4.1 homeobox                                                                |                                          |      |
| 440 | TAGQPEGGPGADFGQSCFPAEAGRDTLSR                  | 960.79        | 3      | 103.0 | Raft     | 2              | 2   | 2        | 2   | 1              | 1   | 1        | 1   | 6                       | 6                       | 6                        | 6                        | 1.00          | 0.000       | 0.551    | USP10       | IP100291946                                                                                          | Ubiquitin carboxyl-terminal hydrolase 10 |      |
| 441 | TPSYSISSTLNPQAPEFILGCTASK                      | 871.77        | 3      | 58.1  | Raft     | 0              | 1   | 0        | 0   | 0              | 0   | 0        | 0   | 0                       | 1                       | 0                        | 1                        |               |             | USP10    | IP100291946 | Ubiquitin carboxyl-terminal hydrolase 10                                                             |                                          |      |
| 442 | ELADNSCLRPIDRNGK                               | 601.73        | 3      | 51.8  | Raft     | 0              | 0   | 1        | 0   | 0              | 0   | 0        | 0   | 1                       | 0                       | 1                        | 0                        |               |             | USP40    | IP100398007 | ubiquitin specific protease 40                                                                       | 810                                      |      |
| 443 | RACSDVTTVAK                                    | 384.46        | 3      | 48.8  | Raft     | 0              | 0   | 0        | 0   | 0              | 1   | 0        | 0   | 0                       | 1                       | 0                        | 1                        |               |             | UTS2D    | IP100792987 | 9 kDa protein                                                                                        |                                          |      |
| 444 | CVFEMPENDKLNDMEPSK                             | 1120.68       | 2      | 51.4  | Non-raft | 2              | 0   | 1        | 0   | 0              | 0   | 0        | 0   | 3                       | 0                       | 3                        | 0                        |               | H           | VAPA     | IP100170692 | vesicle-associated membrane protein-associated protein A isoform 2                                   | 128                                      |      |
| 445 | VCELDLTVSNLAWTSGTNCCTR                         | 1205.97       | 2      | 61.1  | Non-raft | 1              | 0   | 0        | 0   | 0              | 0   | 0        | 0   | 1                       | 0                       | 1                        | 0                        |               |             | VDAC2    | IP100024145 | Isoform 1 of Voltage-dependent anion-selective channel protein 2                                     | 225                                      |      |
| 446 | VCELDLTVSNLAWTSGTNCCTR                         | 1206.48       | 2      | 60.3  | Non-raft | 1              | 0   | 0        | 0   | 0              | 0   | 0        | 0   | 1                       | 0                       | 1                        | 0                        |               |             | VDAC2    | IP100024145 | Isoform 1 of Voltage-dependent anion-selective channel protein 2                                     | 242                                      |      |
| 447 | QVQSLTCEVDALKGTNESLER                          | 1161.32       | 2      | 125.5 | Raft     | 2              | 4   | 3        | 2   | 2              | 3   | 2        | 1   | 9                       | 10                      | 9                        | 10                       | 0.90          | -0.105      | 0.636    | VIM         | IP100418471                                                                                          | Vimentin                                 |      |
| 448 | GQEDAVAPGCKASGR                                | 483.15        | 3      | 46.9  | Raft     | 1              | 0   | 0        | 0   | 0              | 0   | 0        | 0   | 1                       | 0                       | 1                        | 0                        |               |             | VSIG8    | IP100479090 | Novel protein                                                                                        | 29                                       |      |
| 449 | ASPPSSSNCISSGEMQK                              | 428.14        | 4      | 44.6  | Raft     | 0              | 0   | 0        | 0   | 1              | 0   | 0        | 0   | 1                       | 0                       | 1                        | 0                        |               |             | VWF      | IP100023014 | von Willebrand factor precursor                                                                      | 210                                      |      |
| 450 | TWCPPCLPAPSPAQMIPSPAVTGSQRPPWGSQR              | 936.29        | 4      | 58.0  | Raft     | 0              | 0   | 1        | 0   | 0              | 0   | 0        | 0   | 1                       | 0                       | 1                        | 0                        |               |             | WDR90    | IP100640784 | cDNA FLJ44660 fis, clone BRACe3002344, weakly similar to Yvegetabile incompatibility protein HET-E-1 | 983                                      |      |
| 451 | CHGVSGSCTVRTCWR                                | 445.30        | 4      | 46.2  | Non-raft | 0              | 0   | 0        | 1   | 0              | 0   | 0        | 0   | 0                       | 1                       | 0                        | 1                        |               |             | WNT9A    | IP100220170 | Protein Wnt-9a precursor                                                                             |                                          |      |
| 452 | ASGGRGGPAGAAAGSGGGDAPGAGR                      | 550.35        | 4      | 49.5  | Raft     | 0              | 0   | 1        | 0   | 0              | 0   | 0        | 0   | 1                       | 0                       | 1                        | 0                        |               |             | WTIP     | IP100787845 | PREDICTED: similar to WT1-interacting protein                                                        | 201                                      |      |
| 453 | CCCCAGSGGSAGSGGGVAGPGGGGAGSAALCLR              | 720.20        | 4      | 50.7  | Raft     | 0              | 1   | 0        | 0   | 0              | 0   | 0        | 0   | 0                       | 1                       | 0                        | 1                        |               |             | XKR4     | IP100174859 | XK-related protein 4                                                                                 |                                          |      |
| 454 | CCCCAGSGGSAGSGGGVAGPGGGGAGSAALCLR              | 958.31        | 4      | 54.1  | Raft     | 0              | 0   | 0        | 1   | 0              | 0   | 0        | 0   | 0                       | 1                       | 0                        | 1                        |               |             | XKR4     | IP100174859 | XK-related protein 4                                                                                 |                                          |      |
| 455 | YRPENTPEPVSTSVSHYGAEPTTVSPCPSSSAK              | 1155.61       | 3      | 59.5  | Non-raft | 0              | 0   | 1        | 0   | 0              | 0   | 0        | 0   | 1                       | 0                       | 11                       | 0                        |               | H           | YES1     | IP100013981 | Proto-oncogene tyrosine-protein kinase Yes                                                           | 42                                       |      |
|     |                                                | 1155.97       | 3      | 91.8  | Raft     | 4              | 0   | 3        | 0   | 1              | 0   | 2        | 0   | 10                      | 0                       |                          |                          |               |             | YES1     | IP100013981 | Proto-oncogene tyrosine-protein kinase Yes                                                           |                                          |      |
| 456 | MPSCDPGPGPALPTK                                | 425.24        | 4      | 52.7  | Raft     | 0              | 0   | 0        | 0   | 0              | 0   | 0        | 1   | 0                       | 1                       | 0                        | 1                        |               |             | YPEL4    | IP100043857 | Protein yippe-like 4                                                                                 |                                          |      |
| 457 | MSRPSSVSRQPAPGGGGGSPSPCPGGGGGR                 | 709.91        | 4      | 44.6  | Non-raft | 1              | 0   | 1        | 0   | 0              | 0   | 0        | 0   | 2                       | 0                       | 2                        | 0                        |               | M           | YTHDC2   | IP100010200 | YTH domain containing 2                                                                              | 25                                       |      |

| No. | Sequence                                                                                                                                      | Precursor m/z | Charge | Score | Fraction | Replicate      |     |          |     |                |     |          |     | Total EXP Each Fraction | Total CON Each Fraction | Total EXP Both Fractions | Total CON Both Fractions | EXP/CON Ratio | Ln(EXP/CON) | P-value | Gene Symbol | Acc.Number                                        | Description                                               | Site        |
|-----|-----------------------------------------------------------------------------------------------------------------------------------------------|---------------|--------|-------|----------|----------------|-----|----------|-----|----------------|-----|----------|-----|-------------------------|-------------------------|--------------------------|--------------------------|---------------|-------------|---------|-------------|---------------------------------------------------|-----------------------------------------------------------|-------------|
|     |                                                                                                                                               |               |        |       |          | 1st Biological |     |          |     | 2nd Biological |     |          |     |                         |                         |                          |                          |               |             |         |             |                                                   |                                                           |             |
|     |                                                                                                                                               |               |        |       |          | 1st Tech       |     | 2nd Tech |     | 1st Tech       |     | 2nd Tech |     |                         |                         |                          |                          |               |             |         |             |                                                   |                                                           |             |
|     |                                                                                                                                               |               |        |       |          | EXP            | CON | EXP      | CON | EXP            | CON | EXP      | CON |                         |                         |                          |                          |               |             |         |             |                                                   |                                                           |             |
| 458 | LAEQAERYDDMAT <b>C</b> MK                                                                                                                     | 938.56        | 2      | 72.0  | Non-raft | 0              | 3   | 1        | 1   | 0              | 2   | 0        | 2   | 1                       | 8                       | 1                        | 8                        | 0.13          | -2.079      | 1.000   | YWHAQ       | IPI00018146                                       | 14-3-3 protein theta                                      |             |
| 459 | LAEQAERYDDMA <b>A</b> C <b>M</b> CK                                                                                                           | 923.23        | 2      | 71.6  | Non-raft | 4              | 1   | 1        | 4   | 3              | 3   | 1        | 3   | 9                       | 11                      | 10                       | 11                       | 0.91          | -0.095      | 0.628   | YWHAZ       | IPI00021263                                       | 14-3-3 protein zeta/delta                                 |             |
|     |                                                                                                                                               | 616.12        | 3      | 46.3  | Raft     | 0              | 0   | 0        | 0   | 0              | 0   | 1        | 0   | 1                       | 0                       |                          |                          |               |             |         | YWHAZ       | IPI00021263                                       | 14-3-3 protein zeta/delta                                 |             |
| 460 | SLAATPSSSLP <b>C</b> T <b>L</b> I <b>A</b> L <b>G</b> L <b>R</b>                                                                              | 986.56        | 2      | 52.8  | Raft     | 0              | 0   | 1        | 0   | 0              | 0   | 0        | 0   | 1                       | 0                       | 1                        | 0                        |               |             |         | YY1AP1      | IPI00303506                                       | YY1 associated protein                                    | 122         |
| 461 | DSYANGTGSSGGGPGGGGSEASGAGVGS <b>G</b> SSD <b>A</b> I <b>C</b> R <b>D</b> FL <b>R</b>                                                          | 959.60        | 4      | 47.2  | Raft     | 0              | 0   | 0        | 0   | 0              | 0   | 1        | 0   | 1                       | 0                       | 1                        | 0                        |               |             |         | ZC3H10      | IPI00064474                                       | cDNA FLJ14451 fis, clone HEMBB1001834                     | 42          |
| 462 | SEAGHASSPDSEV <b>T</b> S <b>L</b> C <b>Q</b> KE <b>K</b>                                                                                      | 548.21        | 4      | 46.4  | Raft     | 0              | 0   | 0        | 0   | 0              | 0   | 0        | 1   | 0                       | 1                       | 0                        | 1                        |               |             |         | ZCCHC8      | IPI00166422                                       | Isoform 2 of Zinc finger CCHC domain-containing protein 8 |             |
| 463 | MKD <b>C</b> EYQ <b>Q</b> IS <b>P</b> GA <b>A</b> PL <b>P</b> AS <b>P</b> GA <b>R</b>                                                         | 796.80        | 3      | 44.2  | Raft     | 1              | 0   | 0        | 0   | 0              | 0   | 0        | 0   | 1                       | 0                       | 1                        | 0                        |               |             |         | ZDHHC18     | IPI00183979                                       | Palmitoyltransferase ZDHHC18                              | 4           |
| 464 | FRGGV <b>N</b> P <b>F</b> T <b>N</b> G <b>C</b> C <b>N</b> N <b>V</b> S <b>R</b>                                                              | 689.76        | 3      | 58.4  | Raft     | 2              | 0   | 1        | 0   | 2              | 0   | 2        | 0   | 7                       | 0                       | 7                        | 0                        |               | H           | ZDHHC5  | IPI00328272 | Isoform 1 of Probable palmitoyltransferase ZDHHC5 | 236                                                       |             |
| 465 | GGV <b>N</b> P <b>F</b> T <b>N</b> G <b>C</b> C <b>N</b> N <b>V</b> S <b>R</b>                                                                | 820.05        | 2      | 82.9  | Non-raft | 5              | 0   | 4        | 0   | 4              | 0   | 5        | 0   | 18                      | 0                       | 42                       | 0                        |               | H           | ZDHHC5  | IPI00328272 | Isoform 1 of Probable palmitoyltransferase ZDHHC5 | 236/237                                                   |             |
|     |                                                                                                                                               | 820.10        | 2      | 97.5  | Raft     | 6              | 0   | 6        | 0   | 6              | 0   | 6        | 0   | 24                      | 0                       |                          |                          |               |             |         | ZDHHC5      | IPI00328272                                       | Isoform 1 of Probable palmitoyltransferase ZDHHC5         |             |
| 466 | V <b>L</b> C <b>S</b> S <b>P</b> A <b>P</b> R                                                                                                 | 465.19        | 2      | 56.9  | Non-raft | 0              | 0   | 0        | 0   | 2              | 0   | 0        | 0   | 2                       | 0                       | 22                       | 0                        |               | H           | ZDHHC5  | IPI00328272 | Isoform 1 of Probable palmitoyltransferase ZDHHC5 | 245                                                       |             |
|     |                                                                                                                                               | 465.24        | 2      | 66.3  | Raft     | 6              | 0   | 5        | 0   | 4              | 0   | 5        | 0   | 20                      | 0                       |                          |                          |               |             |         | ZDHHC5      | IPI00328272                                       | Isoform 1 of Probable palmitoyltransferase ZDHHC5         |             |
| 467 | T <b>F</b> T <b>S</b> P <b>C</b> T <b>E</b> E <b>P</b> R                                                                                      | 708.49        | 2      | 45.0  | Non-raft | 0              | 0   | 1        | 0   | 0              | 0   | 0        | 0   | 1                       | 0                       | 1                        | 0                        |               |             |         | ZDHHC6      | IPI00008350                                       | Isoform 1 of Probable palmitoyltransferase ZDHHC6         | 343         |
| 468 | Y <b>K</b> V <b>I</b> E <b>D</b> Y <b>S</b> G <b>A</b> C <b>C</b> P <b>L</b> N <b>K</b>                                                       | 902.30        | 2      | 103.4 | Non-raft | 2              | 0   | 2        | 0   | 0              | 0   | 0        | 0   | 4                       | 0                       | 4                        | 0                        |               | H           | ZDHHC6  | IPI00008350 | Isoform 1 of Probable palmitoyltransferase ZDHHC6 | 328/329                                                   |             |
| 469 | G <b>C</b> C <b>G</b> N <b>V</b> E <b>H</b> V <b>L</b> C <b>S</b> P <b>L</b> A <b>P</b> R                                                     | 878.57        | 2      | 75.6  | Non-raft | 2              | 0   | 0        | 0   | 0              | 0   | 0        | 0   | 2                       | 0                       | 2                        | 0                        |               | M           | ZDHHC8  | IPI00385426 | Isoform 1 of Probable palmitoyltransferase ZDHHC8 | 236/237/245                                               |             |
| 470 | S <b>K</b> Y <b>C</b> L <b>K</b>                                                                                                              | 371.05        | 2      | 46.9  | Non-raft | 0              | 0   | 0        | 0   | 0              | 1   | 0        | 0   | 0                       | 1                       | 0                        | 1                        |               |             |         | ZFP161      | IPI00307325                                       | Zinc finger protein 161 homolog                           |             |
| 471 | M <b>I</b> P <b>I</b> C <b>P</b> V <b>V</b> S <b>F</b> T <b>Y</b> V <b>P</b> S <b>R</b> L <b>G</b> E <b>D</b> A <b>K</b>                      | 1232.93       | 2      | 58.6  | Raft     | 0              | 0   | 1        | 0   | 2              | 0   | 1        | 0   | 4                       | 0                       | 4                        | 0                        |               | H           | ZFR     | IPI00333858 | 117 kDa protein                                   | 5                                                         |             |
| 472 | T <b>F</b> C <b>S</b> L <b>S</b> C <b>L</b> S <b>S</b> Y <b>E</b> E <b>K</b>                                                                  | 533.45        | 3      | 44.2  | Non-raft | 0              | 0   | 0        | 0   | 0              | 0   | 0        | 1   | 0                       | 1                       | 0                        | 2                        |               |             |         | ZMYM1       | IPI00470588                                       | Novel protein                                             |             |
|     |                                                                                                                                               | 533.45        | 3      | 44.1  | Raft     | 0              | 0   | 0        | 1   | 0              | 0   | 0        | 0   | 0                       | 1                       |                          |                          |               |             |         | ZMYM1       | IPI00470588                                       | Novel protein                                             |             |
| 473 | STGGGGG <b>D</b> GGGGGGG <b>A</b> E <b>A</b> G <b>T</b> G <b>A</b> G <b>G</b> G <b>C</b> G <b>S</b> <b>C</b> C <b>P</b> G <b>G</b> L <b>R</b> | 890.57        | 3      | 45.0  | Non-raft | 0              | 0   | 1        | 0   | 0              | 0   | 0        | 0   | 1                       | 0                       | 1                        | 0                        |               |             |         | ZNF282      | IPI00003798                                       | Zinc finger protein 282                                   | 496/499/500 |
| 474 | DALEM <b>I</b> C <b>N</b> LE <b>S</b> E <b>G</b> DE <b>K</b>                                                                                  | 899.17        | 2      | 51.9  | Raft     | 0              | 0   | 0        | 1   | 0              | 0   | 0        | 0   | 0                       | 1                       | 0                        | 1                        |               |             |         | ZNF292      | IPI00164352                                       | PREDICTED: similar to Zinc finger protein 292 isoform 1   |             |
| 475 | A <b>C</b> E <b>I</b> K <b>D</b> N <b>S</b> <b>Q</b> C <b>G</b> G <b>P</b> F <b>T</b> Q <b>D</b> S <b>I</b> V <b>N</b> E <b>K</b>             | 946.86        | 3      | 44.2  | Non-raft | 0              | 0   | 0        | 1   | 0              | 0   | 0        | 0   | 0                       | 1                       | 0                        | 1                        |               |             |         | ZNF441      | IPI00175390                                       | Zinc finger protein 441                                   |             |

**Note 1.** No. = Number (see the 1st column).

**Note 2.** The peptide sequences (see the 2nd column) were assorted according to the Gene Symbols (see the 22th column).

**Note 3.** Cysteins in blue (bold and underlined, see the 2nd column) were free cysteine residues, indicating that they were potentially S-acylated prior to ABE reaction. Cysteines in red were modified by N-ethylmaleimide, indicating that they were originally non-acylated.

**Note 4.** The peptide sequences (see the 2nd column) are only representative, since a maximum of one miscleavage gives rise to a maximum of 3 unique peptides.

**Note 5.** High-confidence candidate S-acylated peptides were highlighted with yellow and medium-confidence candidate S-acylated peptides were highlighted with orange (see the 2nd column).

**Note 6.** A value of 1 was substituted for spectral counts of 0 so that the EXP/CON ratios and log-ratios ln(EXP/CON) can be calculated (see the 19th and 20th columns)

**Note 7:** The p-values for the candidate S-acylated peptides that were not identified in the CON groups were not calculated. Instead, the peptides with no less than 3 spectral counts and 2 spectral counts in total in the EXP groups were considered to be candidate S-acylated peptides with high confidence (H) and medium confidence (M), respectively (see the 21th column). See the main text for detailed explanation.

**Note 8.** S-acylated peptides were purified from 1.25 mg non-raft or 2.70 mg raft protein samples.

**Table S6. High-confidence candidate S-acylation sites.**

| Peptide                               | Gene Symbol | Acc. Number | Description                                                                             | Site    | Known Site | Species       | Reference                | Protein-based |
|---------------------------------------|-------------|-------------|-----------------------------------------------------------------------------------------|---------|------------|---------------|--------------------------|---------------|
| MLITSQAMDILRCNPNQK                    | -           | IPI00022913 | PRO1575                                                                                 | 13      |            |               |                          |               |
| KCLLLLQLR                             | -           | IPI00747966 | Conserved hypothetical protein                                                          | 87/92   |            |               |                          |               |
| FRCPALFQPSFLGMESCQGIHETTFNSIMK        | ACTB        | IPI00021439 | Actin, cytoplasmic 1                                                                    | 272     | -          | Dictyostelium | <a href="#">16453612</a> |               |
|                                       | ACTG1       | IPI00021440 | Actin, cytoplasmic 2                                                                    | 272     | -          | Dictyostelium | <a href="#">16453612</a> |               |
| NSGSCCLCLPR                           | ADCY3       | IPI00028513 | Adenylate cyclase type 3                                                                | 46/48   |            |               |                          |               |
| CQPAPPIDEDLPEERPDD                    | ADORA1      | IPI00026872 | Adenosine A1 receptor                                                                   | 309     | 309        | Human         | <a href="#">10455026</a> |               |
| SSGCDVNLPGVNVKLTPTGQISGPEIK           | AHNAK       | IPI00555610 | 313 kDa protein                                                                         | 2572    |            |               |                          |               |
| SCCEQNPELLPK                          | ANLN        | IPI00032958 | Isoform 2 of Actin-binding protein anillin                                              | 309     |            |               |                          |               |
| YCAGEENWVDSR                          | ATP11A      | IPI00255653 | Probable phospholipid-transporting ATPase 1H                                            | 14      |            |               |                          | H             |
| NLEAVETLGGSTSTICSDKTGTLTQNR           | ATP1A1      | IPI00006482 | Isoform Long of Sodium/potassium-transporting ATPase alpha-1 chain precursor            | 374     |            |               |                          |               |
|                                       | ATP1A2      | IPI00003021 | Sodium/potassium-transporting ATPase alpha-1 chain precursor                            | 372     |            |               |                          |               |
| ATSVLCLLR                             | C13orf1     | IPI00030959 | 24 kDa protein                                                                          | 7/8     |            |               |                          | M             |
| MFSCVKPYEDQNYALSRR                    | CAPN5       | IPI00643994 | CDNA FLJ46245 fis, clone TEST14020596, highly similar to Homo sapiens calpain 5         | 44      |            |               |                          |               |
| CFSSVSLQLSQD                          | CAV2        | IPI00019870 | Isoform Alpha of Caveolin-2                                                             | 151     |            |               |                          | H             |
| WACLVAGGSKYSEFTSTTSGTGHNQTR           | CD97        | IPI00299412 | Isoform 2 of CD97 antigen precursor                                                     | 709     |            |               |                          |               |
| LGCCVVEKPQPK                          | CDC42SE1    | IPI00024972 | CDC42 small effector 1                                                                  | 10      |            |               |                          |               |
| LGCCVVEKPQPK                          | CDC42SE1    | IPI00024972 | CDC42 small effector 1                                                                  | 11      |            |               |                          |               |
| LGCCVVEKPQPK                          | CDC42SE1    | IPI00024972 | CDC42 small effector 1                                                                  | 10/11   | 10/11      |               | Uniprot-probable         |               |
| SSSSSSASAAAAAASSASCSR                 | CKAP4       | IPI00141318 | Isoform 1 of Cytoskeleton-associated protein 4                                          | 100     | 100        | Human         | <a href="#">18296695</a> | H             |
| KCEPIIMTVPR                           | CORO1C      | IPI00008453 | coronin-1c                                                                              | 396     |            |               |                          |               |
| YQEAAPNVANNTGPHAASCFGAK               | CTNND1      | IPI00182469 | Isoform 1AB of Catenin delta-1                                                          | 618     |            |               |                          | H             |
| VRPCVVYGGADIGQQIRDLER                 | DDX3X       | IPI00215637 | ATP-dependent RNA helicase DDX3X                                                        | 298     |            |               |                          |               |
| DKDDDGGEDDDANCNLICGDEYGPETR           | DHX9        | IPI00844578 | ATP-dependent RNA helicase A                                                            | 608     |            |               |                          |               |
| AITIANQTNCLPLYITK                     | DPYSL2      | IPI00257508 | Dihydropyrimidinase-related protein 2                                                   | 248     |            |               |                          |               |
| CSGPLGIEGGIISNQITASSTHR               | EDIL3       | IPI00306046 | Isoform 1 of EGF-like repeat and discoidin 1-like domain-containing protein 3 precursor | 158     |            |               |                          |               |
| SCGSSTPDEFPTDIPGTK                    | EIF2S3      | IPI00297982 | Eukaryotic translation initiation factor 2 subunit 3                                    | 105     |            |               |                          |               |
| LDLPNRPETSFLWFTNPCK                   | FER1L3      | IPI00021048 | Isoform 1 of Myoferlin                                                                  | 2013    |            |               |                          | M             |
| CSGPGLSPGMVR                          | FLNA        | IPI00302592 | filamin 1                                                                               | 1165    |            |               |                          |               |
| SPYTVTVGQACNPSCAR                     | FLNA        | IPI00302592 | filamin 1                                                                               | 477/483 |            |               |                          |               |
| VGSAADIPINISSETDLSLLTATVVPSPGREEPCLLK | FLNA        | IPI00302592 | filamin 1                                                                               | 1989    |            |               |                          |               |
| VHSPSGALEECYVTEIDQDKYAVR              | FLNA        | IPI00302592 | filamin 1                                                                               | 2370    |            |               |                          |               |
| AGSNMLLIGVHGPTTPCEEVSMK               | FLNB        | IPI00289334 | Isoform 1 of Filamin-B                                                                  | 2556    |            |               |                          |               |
| AHIANPSGASTECFVTDNADGTYQVEYTPFEK      | FLNB        | IPI00289334 | Isoform 1 of Filamin-B                                                                  | 1280    |            |               |                          |               |
| CLATGPGIASTVK                         | FLNB        | IPI00289334 | Isoform 1 of Filamin-B                                                                  | 1617    |            |               |                          |               |
| GAGTGGLGLTVEGPCAEK                    | FLNB        | IPI00289334 | Isoform 1 of Filamin-B                                                                  | 1081    |            |               |                          |               |
| SPFVVQVGEACNPSCAR                     | FLNB        | IPI00289334 | Isoform 1 of Filamin-B                                                                  | 450     |            |               |                          |               |
| SPFVVQVGEACNPSCAR                     | FLNB        | IPI00289334 | Isoform 1 of Filamin-B                                                                  | 455     |            |               |                          |               |
| SSFLVDCSKAGSNMLLIGVHGPTTPCEEVSMK      | FLNB        | IPI00289334 | Isoform 1 of Filamin-B                                                                  | 2556    |            |               |                          |               |
| VVPCLVTPVTGR                          | FLNB        | IPI00289334 | Isoform 1 of Filamin-B                                                                  | 991     |            |               |                          |               |
| MFFTCCGPNAMVVSQFCR                    | FLOT1       | IPI00027438 | Flotillin-1                                                                             | 17      |            |               |                          | H             |
| MFFTCCGPNAMVVSQFCR                    | FLOT1       | IPI00027438 | Flotillin-1                                                                             | 5/17    |            |               |                          |               |
| SPPVMVAGGRVFLPCIQIQR                  | FLOT1       | IPI00027438 | Flotillin-1                                                                             | 34      | 34         | Mouse         | <a href="#">12370178</a> |               |
| DSGAALGLGIALHSPCYAQVR                 | G6PC3       | IPI00031052 | glucose-6-phosphatase catalytic subunit 3                                               | 269     |            |               |                          |               |
| IISNASCTTNCLAPLAK                     | GAPDH       | IPI00219018 | Glyceraldehyde-3-phosphate dehydrogenase                                                | 156     |            |               |                          |               |
| CGIFAYLNYHVPR                         | GFPT1       | IPI00217952 | Isoform 1 of Glucosamine-fructose-6-phosphate aminotransferase [isomerizing] 1          | 2       |            |               |                          | H             |
| TLESMMACCLSDVEKESK                    | GNA11       | IPI00305551 | Guanine nucleotide-binding protein subunit alpha-11                                     | 9       |            |               |                          | H             |

| Peptide                                                                         | Gene Symbol | Acc. Number | Description                                                        | Site                | Known Site  | Species | Refence                  | Protein-based    |
|---------------------------------------------------------------------------------|-------------|-------------|--------------------------------------------------------------------|---------------------|-------------|---------|--------------------------|------------------|
| TLESMA <b>CC</b> LSDEVKESK                                                      | GNA11       | IPI00305551 | Guanine nucleotide-binding protein subunit alpha-11                | 9/10                | 9/10        | Human   | <a href="#">9175863</a>  |                  |
| SVLSV <b>CF</b> PG <b>CL</b> LTSGEAEQQR                                         | GNA13       | IPI00290928 | Guanine nucleotide-binding protein alpha-13 subunit                | 14                  |             |         |                          | H                |
| SVLSV <b>CF</b> PG <b>CL</b> LTSGEAEQQR                                         | GNA13       | IPI00290928 | Guanine nucleotide-binding protein alpha-13 subunit                | 14/18               | 14/18/37    | Human   | <a href="#">10747909</a> |                  |
| TLESIMA <b>CC</b> LSEEAKEAR                                                     | GNAQ        | IPI00288947 | Guanine nucleotide binding protein                                 | 9                   | 9/10        | Human   |                          | H                |
| TLESIMA <b>CC</b> LSEEAKEAR                                                     | GNAQ        | IPI00288947 | Guanine nucleotide binding protein                                 | 10                  |             |         |                          |                  |
| TLESIMA <b>CC</b> LSEEAKEAR                                                     | GNAQ        | IPI00288947 | Guanine nucleotide binding protein                                 | 9/10                | 9/10        | Human   | <a href="#">8227063</a>  |                  |
| ATTVPD <b>GC</b> RNGLK                                                          | GPRC5A      | IPI00022624 | Retinoic acid-induced protein 3                                    | 9                   |             |         |                          | H                |
| QRNPMDY <b>P</b> VEDAF <b>CK</b> PQLVK                                          | GPRC5A      | IPI00022624 | Retinoic acid-induced protein 3                                    | 284                 |             |         |                          |                  |
| MYG <b>C</b> DLGPDGR                                                            | HLA-B       | IPI00471955 | HLA class I histocompatibility antigen, B-50 alpha chain precursor | 125                 | 332/349     | Human   | <a href="#">17785801</a> | M                |
|                                                                                 | HLA-C       | IPI00473131 | HLA class I histocompatibility antigen, Cw-6 alpha chain precursor | 125                 | -           | Human   | <a href="#">17785801</a> | M                |
| LLQ <b>CD</b> PSSASQF                                                           | HPCA        | IPI00219103 | Neuron-specific calcium-binding protein hippocalcin                | 185                 |             |         |                          |                  |
| SETVLT <b>CA</b> TGR                                                            | ITGA3       | IPI00215995 | Isoform Alpha-3A of Integrin alpha-3 precursor                     | 904                 |             |         |                          | M                |
| VREAM <b>CP</b> GVSGEDSSLLLATQVEGQATNLQR                                        | JUP         | IPI00554711 | Junction plakoglobin                                               | 90                  |             |         |                          |                  |
| MLQSLAGSS <b>CV</b> R                                                           | KCNK1       | IPI00010476 | Potassium channel subfamily K member 1                             | 10                  |             |         |                          |                  |
| SFVLNLGKDSNNL <b>CL</b> HFNPR                                                   | LGALS1      | IPI00219219 | Galectin-1                                                         | 43                  |             |         |                          | M                |
| AVVMIS <b>C</b> NRHTLADNFPVSEER                                                 | M6PR        | IPI00025049 | Cation-dependent mannose-6-phosphate receptor precursor            | 145                 | 30/34       | Bovine  | <a href="#">8647889</a>  | M                |
| SKIVGAPMHDLLLWNNATVTT <b>CH</b> SK                                              | MTHFD1      | IPI00218342 | C-1-tetrahydrofolate synthase, cytoplasmic                         | 195                 |             |         |                          |                  |
| VASMAQ <b>SAP</b> SEAP <b>SC</b> SPFGK                                          | MPP1        | IPI00215610 | 55 kDa erythrocyte membrane protein                                | 242                 | -           | Human   | <a href="#">1713685</a>  | M                |
| FA <b>CH</b> SA <b>SL</b> TVR                                                   | NONO        | IPI00304596 | Non-POU domain-containing octamer-binding protein                  | 145                 |             |         |                          | M                |
| NIQTDNNKSIG <b>CF</b> GSR                                                       | PKP2        | IPI00005264 | Isoform 2 of Plakophilin-2                                         | 647                 |             |         |                          |                  |
| DLAGAPPGEVV <b>GC</b> F <b>T</b> PQSR                                           | PKP3        | IPI00026952 | Plakophilin-3                                                      | 569                 |             |         |                          |                  |
| ADSERLSAP <b>GC</b> WAA <b>CT</b> NFSR                                          | PLP2        | IPI00030362 | Proteolipid protein 2                                              | 12/16               |             |         |                          | M                |
| VYFAAEDTD <b>CC</b> TR                                                          | PLSCR1      | IPI00005181 | Phospholipid scramblase 1                                          | 149                 | 184-189     |         |                          | H                |
| VYFAAEDTD <b>CC</b> TR                                                          | PLSCR1      | IPI00005181 | Phospholipid scramblase 1                                          | 148/149             | 184-189     |         | <a href="#">12564925</a> |                  |
| SGAGQPLGQAAEESN <b>CC</b> AR                                                    | PLSCR3      | IPI00216127 | Phospholipid scramblase 3                                          | 125                 |             |         |                          | H                |
| SGAGQPLGQAAEESN <b>CC</b> AR                                                    | PLSCR3      | IPI00216127 | Phospholipid scramblase 3                                          | 126                 |             |         |                          |                  |
| SGAGQPLGQAAEESN <b>CC</b> AR                                                    | PLSCR3      | IPI00216127 | Phospholipid scramblase 3                                          | 125/126             |             |         |                          |                  |
| VVGP <b>CW</b> T <b>CG</b> CGTDTNFEVK                                           | PLSCR3      | IPI00216127 | Phospholipid scramblase 3                                          | 211/214/216         | 211/214/216 |         |                          | Uniprot-probable |
| VRGP <b>CS</b> TY <b>GC</b> GSDSVFEVK                                           | PLSCR4      | IPI00016776 | Phospholipid scramblase 4                                          | 250/255             | 250/255     |         |                          | Uniprot-probable |
| TREE <b>CH</b> FYAGGQVYPGEASR                                                   | PRDX4       | IPI00011937 | Peroxiredoxin-4                                                    | 51                  |             |         |                          |                  |
| SL <b>IC</b> SISNEVPEHP <b>CV</b> SPVSNHVYER                                    | PRPF19      | IPI00004968 | Pre-mRNA-processing factor 19                                      | 16                  |             |         |                          | M                |
| ALAQEW <b>GC</b> PFMETS <b>AK</b>                                               | RAP2C       | IPI00009607 | Ras-related protein Rap-2c precursor                               | 140                 |             |         |                          | H                |
| LLAQE <b>CA</b> V <b>CG</b> WALPHNRMQALTS <b>CE</b> CT <b>IC</b> PD <b>CF</b> R | RNF31       | IPI00094740 | Isoform 1 of RING finger protein 31                                | 702/717/719/722/725 |             |         |                          |                  |
| AKVDE <b>FPL</b> CGHMVSDYEYQLSSEALEAAR                                          | RPL10       | IPI00554723 | 60S ribosomal protein L10                                          | 49                  |             |         |                          |                  |
| FSV <b>CV</b> LGDQ <b>QH</b> CD <b>EAK</b>                                      | RPL10A      | IPI00412579 | 60S ribosomal protein L10a                                         | 74                  |             |         |                          | M                |
| HPHDIIDDINGAVE <b>CP</b> PAS                                                    | RPL12       | IPI00024933 | 60S ribosomal protein L12                                          | 162                 |             |         |                          | M                |
| SGQGA <b>FG</b> N <b>M</b> CR                                                   | RPL4        | IPI00003918 | 60S ribosomal protein L4                                           | 96                  |             |         |                          |                  |
| AGAIA <b>P</b> CE <b>VT</b> VPAQNTGLGPEK                                        | RPLP0       | IPI00008530 | 60S acidic ribosomal protein P0                                    | 119                 |             |         |                          |                  |
| ALANVNI <b>GL</b> IC <b>NV</b> GAGGPAPAAGAAPAGGPAPSTAAAPAEK                     | RPLP1       | IPI00008527 | 60S acidic ribosomal protein P1                                    | 61                  |             |         |                          |                  |
| KLLMMAGIDD <b>CY</b> T <b>SAR</b>                                               | RPS2        | IPI00013485 | 40S ribosomal protein S2                                           | 222                 |             |         |                          |                  |
| AEPSAATQSHSISSSSFGAEP <b>SAP</b> GGGGSPG <b>AC</b> PALG <b>TK</b>               | RTN3        | IPI00028946 | Reticulon-3                                                        | 34                  |             |         |                          |                  |
| FVQ <b>CP</b> DGELQK                                                            | RUVBL2      | IPI00009104 | RuvB-like 2                                                        | 227                 |             |         |                          |                  |
| ML <b>K</b> CI <b>PL</b> WR                                                     | SCRIB       | IPI00410666 | Isoform 3 of Protein LAP4                                          | 4                   |             |         |                          | H                |
| SPAESAAAGLT <b>CL</b> PSVTR                                                     | SFT2D3      | IPI00166444 | Vesicle transport protein SFT2C                                    | 67                  |             |         |                          | M                |
| VKVQSVETVE <b>GC</b> THEVALPAEEDYLPLKPR                                         | SKIV2L2     | IPI00647217 | Superkiller viralicidic activity 2-like 2                          | 110                 |             |         |                          |                  |
| GLAAA <b>EPT</b> ANGGLALASIEDQGA <b>AGGY</b> CGSRDQVR                           | SLC1A5      | IPI00019472 | Neutral amino acid transporter B(0)                                | 39                  |             |         |                          | H                |

| Peptide                                    | Gene Symbol | Acc. Number | Description                                                        | Site           | Known Site  | Species | Refence                  | Protein-based |
|--------------------------------------------|-------------|-------------|--------------------------------------------------------------------|----------------|-------------|---------|--------------------------|---------------|
| SSGPGMAPSA <u>CCC</u> SPAALQR              | SLC26A11    | IPI00410334 | Sulfate/anion exchanger                                            | 23/24/25       |             |         |                          |               |
| <u>AC</u> VFGNEPKASDEVPLAPR                | SLC35B2     | IPI00384867 | Isoform 2 of Adenosine 3'-phospho 5'-phosphosulfate transporter 1  | 80             |             |         |                          | H             |
| SLNPATIYPVLPKLLSLLPLS <u>CQK</u>           | SLC5A6      | IPI00031822 | Sodium-dependent multivitamin transporter                          | 577            |             |         |                          | H             |
| <u>GCK</u> VLLNIGQQLR                      | SLC7A1      | IPI00027728 | High-affinity cationic amino acid transporter 1                    | 3              |             |         |                          | H             |
| TLTELNK <u>CCGLCVCPC</u> NR                | SNAP23      | IPI00010438 | Isoform SNAP-23a of Synaptosomal-associated protein 23             | 79/80/83/85/87 | 80/83/85/87 | Human   | <a href="#">12551899</a> | H             |
| TTWGDGGENSP <u>CNNV</u> SK                 | SNAP23      | IPI00010438 | Isoform SNAP-23a of Synaptosomal-associated protein 23             | 112            |             |         |                          |               |
| SIGVPIKVLHEAEGHIVT <u>C</u> ETNTGEVYR      | SNRPD3      | IPI00017964 | Small nuclear ribonucleoprotein Sm D3                              | 10             |             |         |                          |               |
| NMVHPNVI <u>CDGC</u> NGPVVVGTR             | SQSTM1      | IPI00179473 | 48 kDa protein                                                     | 131            |             |         |                          |               |
| GPGLFILP <u>CTD</u> SFIK                   | STOM        | IPI00219682 | Erythrocyte band 7 integral membrane protein                       | 87             | 30/87       | Human   | <a href="#">10338112</a> | H             |
| <u>CTKEEHLCTQR</u>                         | TPM3        | IPI00178083 | 29 kDa protein                                                     | 209            |             |         |                          |               |
| AYHEQLSVAEITNA <u>CF</u> FEPANQMVK         | TUBA4A      | IPI00007750 | Tubulin alpha-1 chain                                              | 295            |             |         |                          |               |
| <u>LR</u> CGGTAAEILDV                      | UGCG        | IPI00003861 | Ceramide glucosyltransferase                                       | 384            |             |         |                          |               |
| <u>CV</u> FEMPENDKLNDMEPSK                 | VAPA        | IPI00170692 | vesicle-associated membrane protein-associated protein A isoform 2 | 128            |             |         |                          |               |
| YRPENTPEPVSTSVSHYGAEPTTVSP <u>C</u> PSSSAK | YES1        | IPI00013981 | Proto-oncogene tyrosine-protein kinase Yes                         | 42             | 3           | Monkey  | <a href="#">7980442</a>  | H             |
| FRGGVNPFTNG <u>CC</u> NNVSR                | ZDHHC5      | IPI00328272 | Isoform 1 of Probable palmitoyltransferase ZDHHC5                  | 236            |             |         |                          | H             |
| GGVNPFTNG <u>CC</u> NNVSR                  | ZDHHC5      | IPI00328272 | Isoform 1 of Probable palmitoyltransferase ZDHHC5                  | 236/237        |             |         |                          |               |
| <u>VL</u> CSSPAPR                          | ZDHHC5      | IPI00328272 | Isoform 1 of Probable palmitoyltransferase ZDHHC5                  | 245            |             |         |                          |               |
| YKVIEDYSGA <u>CC</u> PLNK                  | ZDHHC6      | IPI00008350 | Isoform 1 of Probable palmitoyltransferase ZDHHC6                  | 328/329        |             |         |                          | M             |
| MIP <u>C</u> PVVVSFTYVPSRLGEDAK            | ZFR         | IPI00333858 | 117 kDa protein                                                    | 5              |             |         |                          | M             |

**Note 1.** Acc. Number = Accession Number (see the 3rd column).

**Note 2.** Cysteins in blue (bold and underlined, see the 2nd column) were free cysteine residues, indicating they were potentially S-acylated prior to ABE reaction. Cysteines in red (see the 2nd column) were modified by N-ethylmaleimide, indicating they were originally non-acylated.

**Note 3.** Protein-based = Proteins also identified with high (H) or medium (M) confidence using the protein-based procedure (see the 9th column).

**Table S7. Medium-confidence candidate S-acylation sites.**

| Peptide                                                | Gene Symbol | Acc. Number | Description                                                                  | Site        | Known Site  | Species | Reference                | Protein-based |
|--------------------------------------------------------|-------------|-------------|------------------------------------------------------------------------------|-------------|-------------|---------|--------------------------|---------------|
| <u>C</u> QLEINFNTLQTK                                  | ACTN4       | IPI00013808 | Alpha-actinin-4                                                              | 351         |             |         |                          |               |
| MD <u>C</u> SLVR                                       | ATP11A      | IPI00255653 | Probable phospholipid-transporting ATPase 1H                                 | 3           |             |         |                          | H             |
| LIIVEG <u>C</u> QR                                     | ATP1A1      | IPI00006482 | Isoform Long of Sodium/potassium-transporting ATPase alpha-1 chain precursor | 705         |             |         |                          |               |
| AG <u>C</u> CEWLR                                      | ATP9A       | IPI00024368 | Isoform Long of Probable phospholipid-transporting ATPase 1IA                | 24/25       |             |         |                          |               |
| VAQAFREAGENTQVAEPEA <u>C</u> DQMYESLAR                 | C6orf125    | IPI00031617 | Protein C6orf125                                                             | 53          |             |         |                          | M             |
| SVTDVIIAPL <u>C</u> TSVGR                              | CAV2        | IPI00019870 | Isoform Alpha of Caveolin-2                                                  | 145         |             |         |                          | H             |
| AN <u>C</u> EFSPVSGDKP <u>C</u> CR                     | CD38        | IPI00006071 | Isoform 1 of ADP-ribosyl cyclase 1                                           | 15/16       |             |         |                          |               |
| MM <u>C</u> GAPSATQPATAETQHIADQVR                      | CSTB        | IPI00021828 | Cystatin B                                                                   | 3           |             |         |                          |               |
| QDLGGT <u>C</u> VNEG <u>C</u> IPTK                     | DERP12      | IPI00382990 | DERP12                                                                       | 45/50       |             |         |                          |               |
| SSILLDVKPWDDEITDMAKLEE <u>C</u> VR                     | EEF1B2      | IPI00178440 | Elongation factor 1-beta                                                     | 161         |             |         |                          |               |
| AAPAPGAGAASGGAG <u>C</u> SGGGAGAGAGSGGAAGAGGRPSR       | FBXO45      | IPI00174438 | PREDICTED: similar to F-box protein 45 isoform 2                             | 17          |             |         |                          |               |
| DAGYGGISLAVEGPKVDIQTEDLEDGT <u>C</u> K                 | FLNB        | IPI00289334 | Isoform 1 of Filamin-B                                                       | 2057        |             |         |                          |               |
| VAVTEG <u>C</u> QPSR                                   | FLNB        | IPI00289334 | Isoform 1 of Filamin-B                                                       | 1326        |             |         |                          |               |
| VMSQNFN <u>C</u> HTK                                   | G3BP1       | IPI00012442 | Ras-GTPase-activating protein-binding protein 1                              | 73          |             |         |                          |               |
| IISNAS <u>C</u> TTN <u>C</u> LAPLAK                    | GAPDH       | IPI00219018 | Glyceraldehyde-3-phosphate dehydrogenase                                     | 152/156     | 244         | Rabbit  | <a href="#">16128592</a> |               |
| <u>C</u> LLPAEAGGAR                                    | GNA12       | IPI00328744 | Guanine nucleotide-binding protein alpha-12 subunit                          | 11          | 11          | Human   | <a href="#">9485474</a>  | H             |
| <u>C</u> PEALFQ <u>C</u> FLGMES <u>C</u> GIHETTFNSIMK  | LOC653781   | IPI00479743 | protein expressed in prostate, ovary, testis, and placenta 2                 | 965/972     |             |         |                          |               |
| <u>C</u> DC <u>C</u> FHMVLPWTWPGTPGSVSGR               | LOC730269   | IPI00787939 | PREDICTED: similar to periaxin                                               | 2/4         |             |         |                          |               |
| RLLY <u>C</u> QR                                       | MMP14       | IPI00218398 | Matrix metalloproteinase-14 precursor                                        | 574         | 574         | Human   | <a href="#">15946988</a> | H             |
| RDWDNSGPF <u>C</u> GTISSK                              | MPP6        | IPI00303280 | MAGUK p55 subfamily member 6                                                 | 298         | -           | Human   |                          | H             |
| ALALAALAAVEPA <u>C</u> GSR                             | NDFIP1      | IPI00012235 | Isoform 1 of NEDD4 family-interacting protein 1                              | 15          |             |         |                          | M             |
| LKGNHVAVSTA <u>C</u> TTGAHAVGDSFR                      | OXSM        | IPI00016637 | 3-oxoacyl-[acyl-carrier-protein] synthase, mitochondrial precursor           | 209         |             |         |                          |               |
| VMTIPYQMPASSPV <u>C</u> AGGQDR                         | PCBP1       | IPI00016610 | Poly(rc)-binding protein 1                                                   | 194         |             |         |                          |               |
| SGAGQLGQAAEESN <u>C</u> CARL <u>C</u> CGAR             | PLSCR3      | IPI00216127 | Phospholipid scramblase 3                                                    | 130/131     | 211/214/216 |         | Uniprot-probable         | H             |
| EYRDLTTAGAVTQ <u>C</u> YR                              | RPL18A      | IPI00026202 | 60S ribosomal protein L18a                                                   | 109         |             |         |                          |               |
| SA <u>C</u> GV <u>C</u> PGR                            | RPL34       | IPI00219160 | 60S ribosomal protein L34                                                    | 46          |             |         |                          |               |
| AQLNIGNVLPVGTMPGTV <u>C</u> CLEEKPGDRGK                | RPL8        | IPI00012772 | 60S ribosomal protein L8                                                     | 114         |             |         |                          |               |
| GL <u>C</u> FPVVK                                      | SLC35B2     | IPI00384867 | Isoform 2 of Adenosine 3'-phospho 5'-phosphosulfate transporter 1            | 73          |             |         |                          | H             |
| EAALPILEPVLGQEQAAPDQ <u>C</u> VLFADAPEPGQALPVEEEAVTLAR | TNKS1BP1    | IPI00304589 | 182 kDa tankyrase 1-binding protein                                          | 631         |             |         |                          |               |
| MSRPSSVSPRPAPGGGGGGGSP <u>C</u> GPGGGGR                | YTHDC2      | IPI00010200 | YTH domain containing 2                                                      | 25          |             |         |                          |               |
| <u>C</u> CCGNVEHVL <u>C</u> SPLAPR                     | ZDHHC8      | IPI00385426 | Isoform 1 of Probable palmitoyltransferase ZDHHC8                            | 236/237/245 |             |         |                          |               |

**Note 1.** Acc. Number = Accession Number (see the 3rd column).

**Note 2.** Cysteins in blue (bold and underlined, see the 1st column) were free cysteine residues, indicating that they were potentially S-acylated prior to ABE reaction. Cysteines in red (see the 1st column) were modified by N-ethylmaleimide, indicating that they were originally non-acylated.

**Note 3.** Protein-based = Proteins also identified with high (H) or medium (M) confidence using the protein-based procedure (see the 9th column).



**Table S8. Known human S-acylated proteins and S-acylation sites.**

| Accession | Entry name  | Gene symbol | Palmitoylation sites | PMID                     | Status       | Protein names                                                                                                                                                                                                                                                  | Genes                                 | Length |
|-----------|-------------|-------------|----------------------|--------------------------|--------------|----------------------------------------------------------------------------------------------------------------------------------------------------------------------------------------------------------------------------------------------------------------|---------------------------------------|--------|
| Q86YR6    | A26B3_HUMAN | A26B3       | cysteine-rich domain | <a href="#">17904529</a> | Manual       | ANKRD26-like family B member 3 (Ankyrin repeat domain-containing protein 21) (Protein POTE) (Prostate, ovary, testis-expressed protein)                                                                                                                        | A26B3 (ANKRD21) (POTE)                | 584    |
| Q6S8J3    | A26CA_HUMAN | A26C1A      | cysteine-rich domain | <a href="#">17904529</a> | Manual       | ANKRD26-like family C member 1A (Prostate, ovary, testis-expressed protein on chromosome 2) (POTE-2)                                                                                                                                                           | A26C1A (POTE2)                        | 1075   |
| Q6S545    | A26C3_HUMAN | A26C3       | cysteine-rich domain | <a href="#">17904529</a> | Manual       | ANKRD26-like family C member 3 (Prostate, ovary, testis-expressed protein on chromosome 22) (POTE-22)                                                                                                                                                          | A26C3 (ACTBL1) (POTE22)               | 545    |
| P30542    | AA1R_HUMAN  | ADORA1      | 309                  | <a href="#">10455026</a> | HPRD         | Adenosine receptor A1                                                                                                                                                                                                                                          | ADORA1                                | 326    |
| P07550    | ADRB2_HUMAN | ADRB2       | 341                  | <a href="#">2540197</a>  | HPRD         | Beta-2 adrenergic receptor (Beta-2 adrenoreceptor) (Beta-2 adrenoceptor)                                                                                                                                                                                       | ADRB2 (ADRB2R) (B2AR)                 | 413    |
| O43687    | AKA7A_HUMAN | AKAP7       | 5/6                  | <a href="#">9545239</a>  | Uniprot      | A-kinase anchor protein 7 isoforms alpha and beta (Protein kinase A-anchoring protein 7 isoforms alpha/beta) (A-kinase anchor protein 18)                                                                                                                      | AKAP7 (AKAP18)                        | 104    |
| Q9H6X2    | ANTR1_HUMAN | ANTXR1      | 347/481/521          | <a href="#">16401723</a> | Manual       | Anthrax toxin receptor 1 (Tumor endothelial marker 8)                                                                                                                                                                                                          | ANTXR1 (ATR) (TEM8)                   | 564    |
| Q96B13    | APH1A_HUMAN | APH1A       | 182/245              | <a href="#">19028695</a> | Manual       | Gamma-secretase subunit APH-1A                                                                                                                                                                                                                                 | APH1A (PSF) (CGI-78) (UNQ579/PRO1141) | 265    |
| P02647    | APOA1_HUMAN | APOA1       | -                    | <a href="#">3005308</a>  | Uniprot      | Apolipoprotein A-I [Cleaved into: Apolipoprotein A-I(1-242)]                                                                                                                                                                                                   | APOA1                                 | 267    |
| P04114    | APOB_HUMAN  | APOB        | 1112                 | <a href="#">10679026</a> | HPRD/Uniprot | Apolipoprotein B-100 [Cleaved into: Apolipoprotein B-48]                                                                                                                                                                                                       | APOB                                  | 4563   |
| P10275    | ANDR_HUMAN  | AR          | -                    | <a href="#">17535799</a> | Manual       | Androgen receptor (Dihydrotestosterone receptor) (Nuclear receptor subfamily 3 group C member 4)                                                                                                                                                               | AR (DHTR) (NR3C4)                     | 919    |
| P07306    | ASGR1_HUMAN | ASGR1       | 36                   | <a href="#">12171918</a> | HPRD/Uniprot | Asialoglycoprotein receptor 1 (ASGP-R 1) (ASGPR 1) (Hepatic lectin H1)                                                                                                                                                                                         | ASGR1                                 | 291    |
| P07307    | ASGR2_HUMAN | ASGR2       | 54                   | <a href="#">12171918</a> | HPRD/Uniprot | Asialoglycoprotein receptor 2 (ASGP-R 2) (ASGPR 2) (Hepatic lectin H2)                                                                                                                                                                                         | ASGR2                                 | 311    |
| P30518    | V2R_HUMAN   | AVPR2       | 341/342              | <a href="#">9224808</a>  | HPRD/Uniprot | Vasopressin V2 receptor (AVPR V2) (Renal-type arginine vasopressin receptor) (Antidiuretic hormone receptor)                                                                                                                                                   | AVPR2 (ADHR) (DIR) (DIR3) (V2R)       | 371    |
| P30411    | BKRB2_HUMAN | BDKRB2      | 351                  | <a href="#">10085087</a> | HPRD         | B2 bradykinin receptor (BK-2 receptor) (B2R)                                                                                                                                                                                                                   | BDKRB2 (BKR2)                         | 391    |
| Q03135    | CAV1_HUMAN  | CAV1        | 133/143/156          | <a href="#">11451957</a> | HPRD         | Caveolin-1                                                                                                                                                                                                                                                     | CAV1 (CAV)                            | 178    |
| P51681    | CCR5_HUMAN  | CCR5        | 321/323/324          | <a href="#">11448957</a> | HPRD/Uniprot | C-C chemokine receptor type 5 (C-C CKR-5) (CC-CKR-5) (CCR-5) (CCR5) (HIV-1 fusion coreceptor) (CHEMR13) (CD195)                                                                                                                                                | CCR5 (CMKBR5)                         | 352    |
| P48509    | CD151_HUMAN | CD151       | 11/15/242/243        | <a href="#">11907260</a> | HPRD/Uniprot | CD151 antigen (Platelet-endothelial tetraspan antigen 3) (PETA-3) (GP27) (Membrane glycoprotein SFA-1) (Tetraspanin-24) (Tspan-24) (CD151)                                                                                                                     | CD151 (TSPAN24)                       | 253    |
| P16671    | CD36_HUMAN  | CD36        | 3/7/464/466          | <a href="#">8798390</a>  | HPRD/Uniprot | Platelet glycoprotein 4 (Platelet glycoprotein IV) (GPIV) (Glycoprotein IIIb) (GPIIIB) (Leukocyte differentiation antigen CD36) (PAS IV) (PAS-4) (Platelet collagen receptor) (Fatty acid translocase) (FAT) (Thrombospondin receptor) (CD36)                  | CD36 (GP3B) (GP4)                     | 472    |
| P11049    | CD37_HUMAN  | CD37        | -                    | <a href="#">11959120</a> | Manual       | Leukocyte antigen CD37 (Tetraspanin-26) (Tspan-26) (CD antigen CD37)                                                                                                                                                                                           | CD37 (TSPAN26)                        | 281    |
| P01730    | CD4_HUMAN   | CD4         | 419/422              | <a href="#">1618861</a>  | HPRD/Uniprot | T-cell surface glycoprotein CD4 (T-cell surface antigen T4/Leu-3) (CD4)                                                                                                                                                                                        | CD4                                   | 458    |
| P16070    | CD44_HUMAN  | CD44        | 286/295              | <a href="#">16945930</a> | Manual       | CD44 antigen (Phagocytic glycoprotein I) (PGP-1) (HUTCH-I) (Extracellular matrix receptor-III) (ECMR-III) (GP90 lymphocyte homing/adhesion receptor) (Hermes antigen) (Hyaluronate receptor) (Heparan sulfate proteoglycan) (Epican) (CDw44) (CD antigen CD44) | CD44 (LHR) (MDU2) (MDU3) (MIC4)       | 742    |
| P19397    | CD53_HUMAN  | CD53        | -                    | <a href="#">11959120</a> | Manual       | Leukocyte surface antigen CD53 (Cell surface glycoprotein CD53) (Tetraspanin-25) (Tspan-25) (CD antigen CD53)                                                                                                                                                  | CD53                                  | 219    |
| P08962    | CD63_HUMAN  | CD63        | -                    | <a href="#">11959120</a> | Manual       | CD63 antigen (Melanoma-associated antigen ME491) (Ocular melanoma-associated antigen) (OMA81H) (Granulophysin) (Tetraspanin-30) (Tspan-30) (Lysosomal-associated membrane protein 3) (Lamp-3) (CD antigen CD63)                                                | CD63 (MLA1) (TSPAN30)                 | 238    |
| P09564    | CD7_HUMAN   | CD7         | 198                  | -                        | Uniprot      | T-cell antigen CD7 (GP40) (T-cell leukemia antigen) (TP41) (Leu-9) (CD7)                                                                                                                                                                                       | CD7                                   | 240    |
| P04233    | HG2A_HUMAN  | CD74        | 44 (isoform 2)       | <a href="#">3866610</a>  | HPRD         | HLA class II histocompatibility antigen gamma chain (HLA-DR antigens-associated invariant chain) (Ia antigen-associated invariant chain) (Ii) (p33) (CD antigen CD74)                                                                                          | CD74 (DHLA)                           | 296    |
| P60033    | CD81_HUMAN  | CD81        | -                    | <a href="#">11959120</a> | Manual       | CD81 antigen (26 kDa cell surface protein TAPA-1) (Target of the antiproliferative antibody 1) (Tetraspanin-28) (Tspan-28) (CD antigen CD81)                                                                                                                   | CD81 (TAPA1) (TSPAN28)                | 236    |
| P27701    | CD82_HUMAN  | CD82        | 5/74/83/251/253      | <a href="#">15492270</a> | Manual       | CD82 antigen (Inducible membrane protein R2) (C33 antigen) (IA4) (Metastasis suppressor Kangai 1) (Suppressor of tumorigenicity-6) (Tetraspanin-27) (Tspan-27) (CD antigen CD82)                                                                               | CD82 (KAI1) (SAR2) (ST6) (TSPAN27)    | 267    |
| P21926    | CD9_HUMAN   | CD9         | 9/78/79/87/218/219   | <a href="#">11959120</a> | Uniprot      | CD9 antigen (p24) (Leukocyte antigen MIC3) (Motility-related protein) (MRP-1) (Tetraspanin-29) (Tspan-29) (SH9 antigen) (Cell growth-inhibiting gene 2 protein) (CD9)                                                                                          | CD9 (MIC3) (TSPAN29) (GIG2)           | 228    |
| Q9NRR3    | C42S2_HUMAN | CDC42SE2    | 10/11                | <a href="#">15840583</a> | Uniprot      | CDC42 small effector protein 2 (Small effector of CDC42 protein 2)                                                                                                                                                                                             | CDC42SE2 (SPEC2)                      | 84     |
| Q9UKJ5    | CHIC2_HUMAN | CHIC2       | 88/90/92/93/94/95    | <a href="#">11257495</a> | HPRD         | Cysteine-rich hydrophobic domain 2 protein (BrX-like translocated in leukemia)                                                                                                                                                                                 | CHIC2 (BTL)                           | 165    |

| Accession | Entry name  | Gene symbol | Palmitoylation sites             | PMID                     | Status       | Protein names                                                                                                                                                           | Genes                                  | Length |
|-----------|-------------|-------------|----------------------------------|--------------------------|--------------|-------------------------------------------------------------------------------------------------------------------------------------------------------------------------|----------------------------------------|--------|
| P08172    | ACM2_HUMAN  | CHRM2       | 457                              | <a href="#">9143344</a>  | Manual       | Muscarinic acetylcholine receptor M2                                                                                                                                    | CHRM2                                  | 466    |
| Q07065    | CKAP4_HUMAN | CKAP4       | 100                              | <a href="#">18296695</a> | Uniprot      | Cytoskeleton-associated protein 4 (63 kDa membrane protein) (p63)                                                                                                       | CKAP4                                  | 602    |
| O95500    | CLD14_HUMAN | CLDN14      | 104/107/182/185                  | <a href="#">15769849</a> | Manual       | Claudin-14                                                                                                                                                              | CLDN14 (UNQ777/PRO1571)                | 239    |
| O75976    | CBPD_HUMAN  | CPD         | 1317/1321/1323                   | <a href="#">12643288</a> | Uniprot      | Carboxypeptidase D (3.4.17.22) (Metalloprotease D) (gp180)                                                                                                              | CPD                                    | 1380   |
| P78310    | CXAR_HUMAN  | CXADR       | 259/260                          | <a href="#">12021372</a> | HPRD         | Coxsackievirus and adenovirus receptor (Coxsackievirus B-adenovirus receptor) (HCVADR) (hCAR) (CVB3-binding protein)                                                    | CXADR (CAR)                            | 365    |
| Q15700    | DLG2_HUMAN  | DLG2        | 5/7                              | <a href="#">10197530</a> | HPRD         | Disks large homolog 2 (Postsynaptic density protein PSD-93) (Channel-associated protein of synapse-110) (Chapsyn-110)                                                   | DLG2                                   | 870    |
| P21728    | DRD1_HUMAN  | DRD1        | 347/351                          | <a href="#">10618483</a> | HPRD/Uniprot | D(1A) dopamine receptor                                                                                                                                                 | DRD1                                   | 446    |
| P42892    | ECE1_HUMAN  | ECE1        | 46(ECE-1a)/58(ECE-1b)/42(ECE-1c) | <a href="#">10359648</a> | Manual       | Endothelin-converting enzyme 1 (ECE-1) (EC 3.4.24.71) (3.4.24.71)                                                                                                       | ECE1                                   | 770    |
| P24530    | EDNRB_HUMAN | EDNRB       | 400/402/403/405                  | <a href="#">14636059</a> | HPRD/Uniprot | Endothelin B receptor (ET-B) (Endothelin receptor Non-selective type)                                                                                                   | EDNRB (ETRB)                           | 442    |
| P49961    | ENTP1_HUMAN | ENTPD1      | 13                               | <a href="#">10636909</a> | Manual       | Ectonucleoside triphosphate diphosphohydrolase 1 (NTPDase 1) (3.6.1.5) (Ecto-ATP diphosphohydrolase) (ATPDase) (Lymphoid cell activation antigen) (Ecto-apyrase) (CD39) | ENTPD1 (CD39)                          | 510    |
| P16452    | EPB42_HUMAN | EPB42       | 203                              | <a href="#">10333496</a> | HPRD         | Erythrocyte membrane protein band 4.2 (Erythrocyte protein 4.2) (P4.2)                                                                                                  | EPB42 (E42P)                           | 691    |
| Q96RT1    | LAP2_HUMAN  | ERBB2IP     | 14/16                            | <a href="#">18498353</a> | Manual       | Protein LAP2 (ErbB2-interacting protein) (Erbin) (Densin-180-like protein)                                                                                              | ERBB2IP (ERBIN) (KIAA1225) (LAP2)      | 1412   |
| P03372    | ESR1_HUMAN  | ESR1        | 447                              | <a href="#">15033483</a> | Manual       | Estrogen receptor (ER) (Estradiol receptor) (ER-alpha) (Nuclear receptor subfamily 3 group A member 1)                                                                  | ESR1 (ESR) (NR3A1)                     | 595    |
| P13726    | TF_HUMAN    | F3          | 277                              | <a href="#">3166978</a>  | HPRD/Uniprot | Tissue factor (TF) (Coagulation factor III) (Thromboplastin) (CD142)                                                                                                    | F3                                     | 295    |
| P25445    | TNR6_HUMAN  | FAS         | 199                              | <a href="#">17159908</a> | Manual       | Tumor necrosis factor receptor superfamily member 6 (FASLG receptor) (Apoptosis-mediating surface antigen FAS) (Apo-1 antigen) (CD antigen CD95)                        | FAS (APT1) (FAS1) (TNFRSF6)            | 335    |
| P12318    | FCG2A_HUMAN | FCGR2A      | 241                              | <a href="#">16375976</a> | Manual       | Low affinity immunoglobulin gamma Fc region receptor II-a (IgG Fc receptor II-a) (Fc-gamma RII-a) (Fc-gamma-RIIa) (FcRII-a) (CDw32) (CD antigen CD32)                   | FCGR2A (CD32) (FCG2) (FCGR2A1) (IGFR2) | 317    |
| P06241    | FYN_HUMAN   | FYN         | 3/6                              | <a href="#">9060467</a>  | HPRD         | Proto-oncogene tyrosine-protein kinase Fyn (2.7.10.2) (p59-Fyn) (Protooncogene Syn) (SLK)                                                                               | FYN                                    | 537    |
| Q05329    | DCE2_HUMAN  | GAD2        | 30/45                            | <a href="#">12356867</a> | Uniprot      | Glutamate decarboxylase 2 (4.1.1.15) (Glutamate decarboxylase 65 kDa isoform) (65 kDa glutamic acid decarboxylase) (GAD-65)                                             | GAD2 (GAD65)                           | 585    |
| P17677    | NEUM_HUMAN  | GAP43       | 3/4                              | <a href="#">9774477</a>  | HPRD/Uniprot | Neuromodulin (Axonal membrane protein GAP-43) (Growth-associated protein 43) (PP46) (Neural phosphoprotein B-50)                                                        | GAP43                                  | 238    |
| P29992    | GNA11_HUMAN | GNA11       | 9/10                             | <a href="#">9175863</a>  | HPRD         | Guanine nucleotide-binding protein subunit alpha-11                                                                                                                     | GNA11 (GA11)                           | 359    |
| Q03113    | GNA12_HUMAN | GNA12       | 11                               | <a href="#">9485474</a>  | HPRD         | Guanine nucleotide-binding protein alpha-12 subunit (G alpha-12)                                                                                                        | GNA12                                  | 381    |
| Q14344    | GNA13_HUMAN | GNA13       | 14/18/37                         | <a href="#">10747909</a> | HPRD/Uniprot | Guanine nucleotide-binding protein alpha-13 subunit                                                                                                                     | GNA13                                  | 377    |
| P50148    | GNAQ_HUMAN  | GNAQ        | 3/4                              | <a href="#">8227063</a>  | HPRD         | Guanine nucleotide-binding protein G(q) subunit alpha (Guanine nucleotide-binding protein alpha-q)                                                                      | GNAQ (GAQ)                             | 353    |
| P19086    | GNAZ_HUMAN  | GNAZ        | 3                                | <a href="#">8475115</a>  | HPRD         | Guanine nucleotide-binding protein G(z) subunit alpha (G(z) alpha chain) (Gz-alpha)                                                                                     | GNAZ                                   | 355    |
| Q7Z5G4    | GOGA7_HUMAN | GOLGA7      | 69/72                            | <a href="#">14522980</a> | HPRD/Uniprot | Golgin subfamily A member 7 (Golgi complex-associated protein of 16 kDa)                                                                                                | GOLGA7 (GCP16) (HDCKB03P) (HSPC041)    | 137    |
| Q9H8Y8    | GORS2_HUMAN | GORASP2     | -                                | <a href="#">11101516</a> | Uniprot      | Golgi reassembly-stacking protein 2 (GRS2) (Golgi reassembly-stacking protein of 55 kDa) (GRASP55) (p59) (Golgi phosphoprotein 6) (GOLPH6)                              | GORASP2                                | 452    |
| Q99795    | GPA33_HUMAN | GPA33       | -                                | <a href="#">9245713</a>  | Uniprot      | Cell surface A33 antigen (Glycoprotein A33)                                                                                                                             | GPA33                                  | 319    |
| Q13002    | GRIK2_HUMAN | GRIK2       | 858/871                          | <a href="#">8618850</a>  | HPRD         | Glutamate receptor, ionotropic kainate 2 (Glutamate receptor 6) (GluR-6) (GluR6) (Excitatory amino acid receptor 4) (EAA4)                                              | GRIK2 (GLUR6)                          | 908    |
| P43250    | GRK6_HUMAN  | GRK6        | 561/562/565                      | <a href="#">7961702</a>  | HPRD         | G protein-coupled receptor kinase 6 (2.7.11.16) (G protein-coupled receptor kinase GRK6)                                                                                | GRK6 (GPRK6)                           | 576    |
| P01889    | 1B07_HUMAN  | HLA-B       | 332/349                          | <a href="#">17785801</a> | Manual       | HLA class I histocompatibility antigen, B-7 alpha chain (MHC class I antigen B*7)                                                                                       | HLA-B                                  | 362    |
| Q29963    | 1C06_HUMAN  | HLA-C       | -                                | <a href="#">17785801</a> | Manual       | HLA class I histocompatibility antigen, Cw-6 alpha chain (MHC class I antigen Cw*6)                                                                                     | HLA-C (HLAC)                           | 366    |
| P01112    | RASH_HUMAN  | HRAS        | 181/184                          | <a href="#">10504264</a> | HPRD/Uniprot | GTPase HRas (Transforming protein p21) (p21ras) (H-Ras-1) (c-H-ras) (Ha-Ras)                                                                                            | HRAS (HRAS1)                           | 189    |
| P16144    | ITB4_HUMAN  | ITGB4       | cysteine-rich domain             | <a href="#">14517202</a> | Manual       | Integrin beta-4 (GP150) (CD antigen CD104)                                                                                                                              | ITGB4                                  | 1822   |
| Q09470    | KCNA1_HUMAN | KCNA1       | 243                              | <a href="#">15837928</a> | Uniprot      | Potassium voltage-gated channel subfamily A member 1 (Voltage-gated potassium channel subunit Kv1.1) (HUK1) (HBK1)                                                      | KCNA1                                  | 495    |
| Q9Y2W7    | CSEN_HUMAN  | KCNIP3      | 45/46                            | <a href="#">12006572</a> | HPRD         | Calsenilin (Kv channel-interacting protein 3) (KChIP3) (A-type potassium channel modulatory protein 3) (DRE-antagonist modulator) (DREAM)                               | KCNIP3 (CSEN) (DREAM) (KCHIP3)         | 256    |
| P01116    | RASK_HUMAN  | KRAS        | 180                              | <a href="#">3023817</a>  | Uniprot      | GTPase KRas (K-Ras 2) (Ki-Ras) (c-K-ras) (c-Ki-ras)                                                                                                                     | KRAS (KRAS2) (RASK2)                   | 189    |

| Accession | Entry name   | Gene symbol | Palmitoylation sites             | PMID                     | Status       | Protein names                                                                                                                                                                                                                                                                                                                                                        | Genes                                        | Length |
|-----------|--------------|-------------|----------------------------------|--------------------------|--------------|----------------------------------------------------------------------------------------------------------------------------------------------------------------------------------------------------------------------------------------------------------------------------------------------------------------------------------------------------------------------|----------------------------------------------|--------|
| O43561    | LAT_HUMAN    | LAT         | 26/29                            | <a href="#">9729044</a>  | HPRD/Uniprot | Linker for activation of T-cells family member 1 (36 kDa phospho-tyrosine adapter protein) (pp36) (p36-38)                                                                                                                                                                                                                                                           | LAT                                          | 262    |
| P06239    | LCK_HUMAN    | LCK         | 3/5                              | <a href="#">9092949</a>  | HPRD         | Proto-oncogene tyrosine-protein kinase LCK (2.7.10.2) (Lymphocyte cell-specific protein-tyrosine kinase) (p56-LCK) (LSK) (T cell-specific protein-tyrosine kinase)                                                                                                                                                                                                   | LCK                                          | 509    |
| P22888    | LSHR_HUMAN   | LHCGR       | 643/644                          | <a href="#">15539429</a> | Uniprot      | Lutropin-choriogonadotropic hormone receptor (LH/CG-R) (LSH-R) (Luteinizing hormone receptor) (LHR)                                                                                                                                                                                                                                                                  | LHCGR (LCGR) (LGR2) (LHRHR)                  | 699    |
| O75581    | LRP6_HUMAN   | LRP6        | 1394/1399                        | <a href="#">18378904</a> | Manual       | Low-density lipoprotein receptor-related protein 6                                                                                                                                                                                                                                                                                                                   | LRP6                                         | 1613   |
| P07948    | LYN_HUMAN    | LYN         | 3                                | <a href="#">10669752</a> | Manual       | Tyrosine-protein kinase Lyn (EC 2.7.10.2) (2.7.10.2)                                                                                                                                                                                                                                                                                                                 | LYN                                          | 512    |
| Q9H9H5    | MAP6D1_HUMAN | MAP6D1      | 5/10/11                          | <a href="#">16837464</a> | Uniprot      | MAP6 domain-containing protein 1 (21 kDa STOP-like protein) (SL21)                                                                                                                                                                                                                                                                                                   | MAP6D1                                       | 199    |
| P30301    | MIP_HUMAN    | MIP         | 88                               | <a href="#">2335219</a>  | HPRD         | Lens fiber major intrinsic protein (Aquaporin-0) (MIP26) (MP26)                                                                                                                                                                                                                                                                                                      | MIP (AQP0)                                   | 263    |
| P50281    | MMP14_HUMAN  | MMP14       | 574                              | <a href="#">15946988</a> | Manual       | Matrix metalloproteinase-14 (MMP-14) (EC 3.4.24.80) (3.4.24.80) (Membrane-type matrix metalloproteinase 1) (MT-MMP 1) (MTMMP1) (Membrane-type-1 matrix metalloproteinase) (MT1-MMP) (MT1MMP) (MMP-X1)                                                                                                                                                                | MMP14                                        | 582    |
| Q00013    | EM55_HUMAN   | MPP1        | -                                | <a href="#">1713685</a>  | Uniprot      | 55 kDa erythrocyte membrane protein (p55) (Membrane protein, palmitoylated 1)                                                                                                                                                                                                                                                                                        | MPP1 (DXS552E) (EMP55)                       | 466    |
| P15941    | MUC1_HUMAN   | MUC1        | 1184/1186                        | <a href="#">16507569</a> | Uniprot      | Mucin-1 (MUC-1) (Polymorphic epithelial mucin) (PEM) (PEMT) (Episialin) (Tumor-associated mucin) (Carcinoma-associated mucin) (Tumor-associated epithelial membrane antigen) (EMA) (H23AG) (Peanut-reactive urinary mucin) (PUM) (Breast carcinoma-associated antigen DF3) (CD227) [Cleaved into: Mucin-1 subunit alpha; Mucin-1 subunit beta (MUC1-beta) (MUC1-CT)] | MUC1 (PUM)                                   | 1255   |
| O35116    | NICA_HUMAN   | NCSTN       | 689                              | <a href="#">19028695</a> | Manual       | Nicastrin                                                                                                                                                                                                                                                                                                                                                            | NCSTN (KIAA0253) (UNQ1874/PRO4317)           | 709    |
| P29474    | NOS3_HUMAN   | NOS3        | 15/26                            | <a href="#">9111020</a>  | HPRD         | Nitric oxide synthase, endothelial (1.14.13.39) (Endothelial NOS) (eNOS) (EC-NOS) (NOS type III) (NOSIII) (Constitutive NOS) (cNOS)                                                                                                                                                                                                                                  | NOS3                                         | 1203   |
| P01111    | RASN_HUMAN   | NRAS        | 181                              | <a href="#">2661017</a>  | Uniprot      | GTPase NRas (Transforming protein N-Ras)                                                                                                                                                                                                                                                                                                                             | NRAS (HRAS1)                                 | 189    |
| Q16549    | PCSK7_HUMAN  | PCSK7       | 699/704                          | <a href="#">11104692</a> | HPRD         | Proprotein convertase subtilisin/kexin type 7 (3.4.21.-) (Proprotein convertase PC7) (Subtilisin/kexin-like protease PC7) (Prohormone convertase PC7) (hPC8) (PC8) (Lymphoma proprotein convertase)                                                                                                                                                                  | PCSK7 (LPC) (PC7) (PC8) (SPC7)               | 785    |
| P16284    | PECA1_HUMAN  | PECAM1      | 622                              | <a href="#">17139370</a> | Manual       | Platelet endothelial cell adhesion molecule (PECAM-1) (EndoCAM) (GPIIA) (CD antigen CD31)                                                                                                                                                                                                                                                                            | PECAM1                                       | 738    |
| P06401    | PRGR_HUMAN   | PGR         | -                                | <a href="#">17535799</a> | Manual       | Progesterone receptor (PR) (Nuclear receptor subfamily 3 group C member 3)                                                                                                                                                                                                                                                                                           | PGR (NR3C3)                                  | 933    |
| Q8TCG2    | P4K2B_HUMAN  | PI4K2B      | cysteine-rich domain             | <a href="#">17927563</a> | Manual       | Phosphatidylinositol 4-kinase type 2-beta (EC 2.7.1.67) (2.7.1.67) (Phosphatidylinositol 4-kinase type II-beta)                                                                                                                                                                                                                                                      | PI4K2B                                       | 481    |
| O15162    | PLS1_HUMAN   | PLSCR1      | cysteine-rich sequence (184-189) | <a href="#">12564925</a> | Manual       | Phospholipid scramblase 1 (PL scramblase 1) (Ca(2+)-dependent phospholipid scramblase 1) (Erythrocyte phospholipid scramblase) (MmTRA1b)                                                                                                                                                                                                                             | PLSCR1                                       | 318    |
| A5A3E0    | A26CB_HUMAN  | POTEF       | cysteine-rich domain             | <a href="#">17904529</a> | Manual       | ANKRD26-like family C member 1B (Chimeric POTE-actin protein)                                                                                                                                                                                                                                                                                                        | A26C1B                                       | 1075   |
| P11801    | KPSH1_HUMAN  | PSKH1       | 3                                | <a href="#">14644153</a> | Uniprot      | Serine/threonine-protein kinase H1 (2.7.11.1) (PSK-H1)                                                                                                                                                                                                                                                                                                               | PSKH1                                        | 424    |
| P43119    | PI2R_HUMAN   | PTGIR       | 308/311                          | <a href="#">12488443</a> | HPRD/Uniprot | Prostacyclin receptor (Prostanoid IP receptor) (PGI receptor) (Prostaglandin I2 receptor)                                                                                                                                                                                                                                                                            | PTGIR (PRIPR)                                | 386    |
| P61225    | RAP2B_HUMAN  | RAP2B       | 176/177                          | <a href="#">18582561</a> | Manual       | Ras-related protein Rap-2b                                                                                                                                                                                                                                                                                                                                           | RAP2B                                        | 183    |
| Q7LDG7    | GRP2_HUMAN   | RASGRP2     | 7 (isoform 2)                    | <a href="#">10918068</a> | HPRD         | RAS guanyl-releasing protein 2 (Calcium and DAG-regulated guanine nucleotide exchange factor 1) (CalDAG-GEF1) (F25B3.3 kinase-like protein) (Cdc25-like protein) (HCDC25L)                                                                                                                                                                                           | RASGRP2 (CDC25L) (MCG7)                      | 609    |
| Q14699    | RFTN1_HUMAN  | RFTN1       | 3                                | <a href="#">12805216</a> | HPRD         | Raftlin (Raft-linking protein) (Cell migration-inducing gene 2 protein)                                                                                                                                                                                                                                                                                              | RFTN1 (KIAA0084) (MIG2)                      | 578    |
| O43665    | RGS10_HUMAN  | RGS10       | 66                               | <a href="#">10608901</a> | HPRD/Uniprot | Regulator of G-protein signaling 10                                                                                                                                                                                                                                                                                                                                  | RGS10                                        | 173    |
| O15492    | RGS16_HUMAN  | RGS16       | 2/12/98                          | <a href="#">10373502</a> | HPRD         | Regulator of G-protein signaling 16 (RGS16) (Retinally abundant regulator of G-protein signaling) (RGS-R) (A28-RGS14P)                                                                                                                                                                                                                                               | RGS16 (RGSR)                                 | 202    |
| P49795    | RGS19_HUMAN  | RGS19       | -                                | <a href="#">8986788</a>  | Uniprot      | Regulator of G-protein signaling 19 (RGS19) (G-alpha-interacting protein) (GAIP)                                                                                                                                                                                                                                                                                     | RGS19 (GAIP) (GNAI3IP)                       | 217    |
| P49798    | RGS4_HUMAN   | RGS4        | 2/12/95                          | <a href="#">9576926</a>  | HPRD/Uniprot | Regulator of G-protein signaling 4                                                                                                                                                                                                                                                                                                                                   | RGS4                                         | 205    |
| P08100    | OPSD_HUMAN   | RHO         | 322/323                          | <a href="#">3350146</a>  | HPRD         | Rhodopsin (Opsin-2)                                                                                                                                                                                                                                                                                                                                                  | RHO (OPN2)                                   | 348    |
| P62745    | RHOB_HUMAN   | RHOB        | 189/192                          | <a href="#">1400319</a>  | HPRD/Uniprot | Rho-related GTP-binding protein RhoB (H6)                                                                                                                                                                                                                                                                                                                            | RHOB (ARH6) (ARHB)                           | 196    |
| Q7L0Q8    | RHOU_HUMAN   | RHOU        | 256                              | <a href="#">16046391</a> | Uniprot      | Rho-related GTP-binding protein RhoU (Wnt-1 responsive Cdc42 homolog 1) (WRCH-1) (Ryu GTPase) (CDC42-like GTPase 1) (Rho GTPase-like protein ARHU) (GTP-binding protein-like 1)                                                                                                                                                                                      | RHOU (ARHU) (CDC42L1) (G28K) (WRCH1) (SB128) | 258    |
| O75695    | XRP2_HUMAN   | RP2         | 3                                | <a href="#">10942419</a> | HPRD         | Protein XRP2                                                                                                                                                                                                                                                                                                                                                         | RP2                                          | 350    |
| P10301    | RRAS_HUMAN   | RRAS        | 213                              | <a href="#">12890755</a> | Manual       | Ras-related protein R-Ras (p23)                                                                                                                                                                                                                                                                                                                                      | RRAS                                         | 218    |
| P16109    | LYAM3_HUMAN  | SELP        | 807                              | <a href="#">7684381</a>  | Uniprot      | P-selectin (Granule membrane protein 140) (GMP-140) (PADGEM) (Leukocyte-endothelial cell adhesion molecule 3) (LECAM3) (CD62 antigen-like family member P) (CD62P)                                                                                                                                                                                                   | SELP (GMRP) (GRMP)                           | 830    |

| Accession | Entry name  | Gene symbol | Palmitoylation sites | PMID                     | Status       | Protein names                                                                                                                                                                               | Genes                            | Length |
|-----------|-------------|-------------|----------------------|--------------------------|--------------|---------------------------------------------------------------------------------------------------------------------------------------------------------------------------------------------|----------------------------------|--------|
| P11686    | PSPC_HUMAN  | SFTPC       | 28/29                | <a href="#">11802797</a> | HPRD/Uniprot | Pulmonary surfactant-associated protein C (SP-C) (SP5) (Pulmonary surfactant-associated proteolipid SPL(Val))                                                                               | SFTPC (SFTP2)                    | 197    |
| P02730    | B3AT_HUMAN  | SLC4A1      | 843                  | <a href="#">1885574</a>  | Uniprot      | Band 3 anion transport protein (Anion exchange protein 1) (AE 1) (Solute carrier family 4 member 1) (CD233)                                                                                 | SLC4A1 (AE1) (DI) (EPB3)         | 911    |
| Q8NHU3    | SMS2_HUMAN  | SGMS2       | 331/332/343/348      | <a href="#">19233134</a> | Manual       | Phosphatidylcholine:ceramide cholinephosphotransferase 2                                                                                                                                    | SGMS2 (SMS2)                     | 365    |
| O00161    | SNP23_HUMAN | SNAP23      | 80/83/85/87          | <a href="#">12551899</a> | HPRD         | Synaptosomal-associated protein 23 (SNAP-23) (Vesicle-membrane fusion protein SNAP-23)                                                                                                      | SNAP23                           | 211    |
| P60880    | SNP25_HUMAN | SNAP25      | 85/88/90/92          | <a href="#">9349529</a>  | HPRD         | Synaptosomal-associated protein 25 (SNAP-25) (Synaptosomal-associated 25 kDa protein) (Super protein) (SUP)                                                                                 | SNAP25 (SNAP)                    | 206    |
| O75716    | STK16_HUMAN | STK16       | 6/8                  | <a href="#">10364453</a> | HPRD         | Serine/threonine-protein kinase 16 (2.7.11.1) (Protein kinase PKL12) (Myristoylated and palmitoylated serine/threonine-protein kinase) (MPSK) (TGF-beta-stimulated factor 1) (TSF-1) (hPSK) | STK16 (MPSK1) (PKL12) (TSF1)     | 305    |
| Q93045    | STMN2_HUMAN | STMN2       | 22/24                | <a href="#">9030585</a>  | HPRD         | Stathmin-2 (Superior cervical ganglion-10 protein) (Protein SCG10)                                                                                                                          | STMN2 (SCG10) (SCGN10)           | 179    |
| P27105    | STOM_HUMAN  | STOM        | 30/87                | <a href="#">10338112</a> | HPRD/Uniprot | Erythrocyte band 7 integral membrane protein (Stomatin) (Protein 7.2b)                                                                                                                      | STOM (BND7) (EPB72)              | 288    |
| Q92542    | STX7_HUMAN  | STX7        | 239                  | <a href="#">18980942</a> | Manual       | Syntaxin-7                                                                                                                                                                                  | STX7                             | 261    |
| O15400    | STX8_HUMAN  | STX8        | C214                 | <a href="#">18980942</a> | Manual       | Syntaxin-8                                                                                                                                                                                  | STX8                             | 236    |
| P02786    | TFR1_HUMAN  | TFRC        | 62/67                | <a href="#">2398066</a>  | HPRD/Uniprot | Transferrin receptor protein 1 (TfR1) (TfR) (TR) (Trfr) (T9) (p90) (CD71) [Cleaved into: Transferrin receptor protein 1, serum form]                                                        | TFRC                             | 760    |
| P01135    | TGFA_HUMAN  | TGFA        | 153/154              | <a href="#">8910478</a>  | HPRD/Uniprot | Protransforming growth factor alpha [Cleaved into: Transforming growth factor alpha (TGF-alpha) (EGF-like TGF) (ETGF) (TGF type 1)]                                                         | TGFA                             | 160    |
| P01375    | TNFA_HUMAN  | TNF         | 47                   | <a href="#">11434916</a> | Manual       | Tumor necrosis factor, membrane form                                                                                                                                                        | TNF (TNFA) (TNFSF2)              | 233    |
| Q9UNK0    | TR10A_HUMAN | TNFRSF10A   | 261CCC263            | <a href="#">19090789</a> | Manual       | Tumor necrosis factor receptor superfamily member 10A (Death receptor 4)                                                                                                                    | TNFRSF10A (APO2) (DR4) (TRAILR1) | 468    |
| O43617    | TPPC3_HUMAN | TRAPPC3     | 68                   | <a href="#">15692564</a> | Uniprot      | Trafficking protein particle complex subunit 3 (BET3 homolog)                                                                                                                               | TRAPPC3 (BET3) (CDABP0066)       | 180    |
| O15498    | YKT6_HUMAN  | YKT6        | 194                  | <a href="#">15479160</a> | Uniprot      | Synaptobrevin homolog YKT6                                                                                                                                                                  | YKT6                             | 198    |

**Note 1.** HPRD means that the S-acylated proteins are included in the Human Protein Reference Database ([www.hprd.org](http://www.hprd.org)). Uniprot means that the S-acylated proteins are included in the Uniprot database and the organism is Homo Sapiens. Manual means that the knowledge about the S-acylated proteins are manually retrieved from PubMed. PMID means PubMed identifiers (see the 6th column).

**Table S9. Potential human S-acylated proteins and S-acylation sites annotated in the Uniprot database.**

| Accession | Entry name  | Gene symbol | Site             | Evidence      | Protein names                                                                                                                                                                       | Genes                                    | Length |
|-----------|-------------|-------------|------------------|---------------|-------------------------------------------------------------------------------------------------------------------------------------------------------------------------------------|------------------------------------------|--------|
| P29275    | AA2BR_HUMAN | ADORA2B     | 311              | potential     | Adenosine receptor A2b                                                                                                                                                              | ADORA2B                                  | 332    |
| P33765    | AA3R_HUMAN  | ADORA3      | 303              | potential     | Adenosine A3 receptor                                                                                                                                                               | ADORA3 (UNQ1931/PRO4406)                 | 318    |
| P35348    | ADA1A_HUMAN | ADRA1A      | 345              | potential     | Alpha-1A adrenergic receptor (Alpha 1A-adrenoreceptor) (Alpha 1A-adrenoceptor) (Alpha-1C adrenergic receptor) (Alpha-adrenergic receptor 1c)                                        | ADRA1A (ADRA1C)                          | 466    |
| P35368    | ADA1B_HUMAN | ADRA1B      | 365              | potential     | Alpha-1B adrenergic receptor (Alpha 1B-adrenoreceptor) (Alpha 1B-adrenoceptor)                                                                                                      | ADRA1B                                   | 520    |
| P25100    | ADA1D_HUMAN | ADRA1D      | 419              | potential     | Alpha-1D adrenergic receptor (Alpha 1D-adrenoreceptor) (Alpha 1D-adrenoceptor) (Alpha-1A adrenergic receptor) (Alpha-adrenergic receptor 1a)                                        | ADRA1D (ADRA1A)                          | 572    |
| P08913    | ADA2A_HUMAN | ADRA2A      | 442              | by similarity | Alpha-2A adrenergic receptor (Alpha-2A adrenoreceptor) (Alpha-2A adrenoceptor) (Alpha-2AAR) (Alpha-2 adrenergic receptor subtype C10)                                               | ADRA2A (ADRA2R) (ADRAR)                  | 450    |
| P18089    | ADA2B_HUMAN | ADRA2B      | 442              | potential     | Alpha-2B adrenergic receptor (Alpha-2B adrenoreceptor) (Alpha-2B adrenoceptor) (Alpha-2 adrenergic receptor subtype C2)                                                             | ADRA2B (ADRA2L1) (ADRA2RL1)              | 450    |
| P08588    | ADRB1_HUMAN | ADRB1       | 392              | by similarity | Beta-1 adrenergic receptor (Beta-1 adrenoreceptor) (Beta-1 adrenoceptor)                                                                                                            | ADRB1 (ADRB1R) (B1AR)                    | 477    |
| P13945    | ADRB3_HUMAN | ADRB3       | 361              | by similarity | Beta-3 adrenergic receptor (Beta-3 adrenoreceptor) (Beta-3 adrenoceptor)                                                                                                            | ADRB3 (ADRB3R) (B3AR)                    | 408    |
| P30556    | AGTR1_HUMAN | AGTR1       | 355              | potential     | Type-1 angiotensin II receptor (AT1) (AT1AR) (AT1BR)                                                                                                                                | AGTR1 (AGTR1A) (AGTR1B) (AT2R1) (AT2R1B) | 359    |
| P37288    | V1AR_HUMAN  | AVPR1A      | 365/366          | by similarity | Vasopressin V1a receptor (V1aR) (Vascular/hepatic-type arginine vasopressin receptor) (Antidiuretic hormone receptor 1a) (AVPR V1a)                                                 | AVPR1A (AVPR1)                           | 418    |
| Q8WX53    | BAALC_HUMAN | BAALC       | 3                | by similarity | Brain and acute leukemia cytoplasmic protein                                                                                                                                        | BAALC                                    | 180    |
| P46663    | BKRB1_HUMAN | BDKRB1      | 330              | potential     | B1 bradykinin receptor (BK-1 receptor) (B1R)                                                                                                                                        | BDKRB1 (BRADYB1)                         | 353    |
| Q5T215    | TPC3L_HUMAN | BET3L       | 68               | by similarity | Trafficking protein particle complex subunit 3-like protein (TRAPPC3-like protein) (BET3-like protein)                                                                              | BET3L                                    | 181    |
| P32247    | BRS3_HUMAN  | BRS3        | 347              | by similarity | Bombesin receptor subtype-3                                                                                                                                                         | BRS3                                     | 399    |
| P32238    | CCKAR_HUMAN | CCKAR       | 387              | by similarity | Cholecystokinin receptor type A (CCK-A receptor) (CCK-AR) (Cholecystokinin-1 receptor) (CCK1-R)                                                                                     | CCKAR (CCKRA)                            | 428    |
| P32239    | GASR_HUMAN  | CCKBR       | 408              | by similarity | Gastrin/cholecystokinin type B receptor (CCK-B receptor) (CCK-BR) (Cholecystokinin-2 receptor) (CCK2-R)                                                                             | CCKBR (CCKRB)                            | 447    |
| Q9NRR8    | C42S1_HUMAN | CDC42SE1    | 10/11            | probable      | CDC42 small effector protein 1 (Small effector of CDC42 protein 1) (CDC42-binding protein SCIP1)                                                                                    | CDC42SE1 (SPEC1)                         | 79     |
| Q5VXU3    | CHIC1_HUMAN | CHIC1       | –                | by similarity | Cysteine-rich hydrophobic domain 1 protein (Brain X-linked protein)                                                                                                                 | CHIC1 (BRX)                              | 224    |
| P78352    | DLG4_HUMAN  | DLG4        | 3/5              | by similarity | Disks large homolog 4 (Postsynaptic density protein 95) (PSD-95) (Synapse-associated protein 90) (SAP90)                                                                            | DLG4 (PSD95)                             | 724    |
| Q9H3Z4    | DNJC5_HUMAN | DNAJC5      | 118-128 poly-Cys | by similarity | DnaJ homolog subfamily C member 5 (Cysteine string protein) (CSP)                                                                                                                   | DNAJC5 (CSP)                             | 198    |
| Q9UF47    | DNJ5B_HUMAN | DNAJC5B     | 126-137 poly-Cys | by similarity | DnaJ homolog subfamily C member 5B (Beta cysteine string protein) (Beta-CSP)                                                                                                        | DNAJC5B                                  | 199    |
| Q8N7S2    | DNJ5G_HUMAN | DNAJC5G     | 136-146 poly-Cys | by similarity | DnaJ homolog subfamily C member 5G (Gamma-cysteine string protein) (Gamma-CSP)                                                                                                      | DNAJC5G                                  | 189    |
| P21918    | DRD5_HUMAN  | DRD5        | 375              | by similarity | D(1B) dopamine receptor (D1beta dopamine receptor) (D(5) dopamine receptor)                                                                                                         | DRD5 (DRD1B) (DRD1L2)                    | 477    |
| P21453    | S1PR1_HUMAN | EDG1        | 327              | by similarity | Sphingosine 1-phosphate receptor 1 (S1P receptor 1) (S1P1) (Sphingosine 1-phosphate receptor Edg-1) (S1P receptor Edg-1) (Endothelial differentiation G-protein coupled receptor 1) | S1PR1 (EDG1)                             | 381    |
| Q92633    | LPAR1_HUMAN | EDG2        | 327              | by similarity | Lysophosphatidic acid receptor 1 (LPA receptor 1) (LPA-1) (Lysophosphatidic acid receptor Edg-2)                                                                                    | LPAR1 (EDG2) (LPA1)                      | 364    |
| Q9HBW0    | LPAR2_HUMAN | EDG4        | 311              | by similarity | Lysophosphatidic acid receptor 2 (LPA receptor 2) (LPA-2) (Lysophosphatidic acid receptor Edg-4)                                                                                    | LPAR2 (EDG4) (LPA2)                      | 351    |
| O95136    | S1PR2_HUMAN | EDG5        | 305              | by similarity | Sphingosine 1-phosphate receptor 2 (S1P receptor 2) (S1P2) (Sphingosine 1-phosphate receptor Edg-5) (S1P receptor Edg-5) (Endothelial differentiation G-protein coupled receptor 5) | S1PR2 (EDG5)                             | 353    |
| O95977    | S1PR4_HUMAN | EDG6        | 323              | by similarity | Sphingosine 1-phosphate receptor 4 (S1P receptor 4) (S1P4) (Sphingosine 1-phosphate receptor Edg-6) (S1P receptor Edg-6) (Endothelial differentiation G-protein coupled receptor 6) | S1PR4 (EDG6)                             | 384    |
| Q9UBY5    | LPAR3_HUMAN | EDG7        | 309              | by similarity | Lysophosphatidic acid receptor 3 (LPA receptor 3) (LPA-3) (Lysophosphatidic acid receptor Edg-7)                                                                                    | LPAR3 (EDG7) (LPA3)                      | 353    |
| Q9H228    | S1PR5_HUMAN | EDG8        | 323              | by similarity | Sphingosine 1-phosphate receptor 5 (S1P receptor 5) (S1P5) (Sphingosine 1-phosphate receptor Edg-8) (S1P receptor Edg-8) (Endothelial differentiation G-protein-coupled receptor 8) | S1PR5 (EDG8)                             | 398    |
| Q7Z444    | RASE_HUMAN  | ERAS        | 226/228          | by similarity | GTPase ERas (E-Ras) (Embryonic stem cell-expressed Ras)                                                                                                                             | ERAS (HRAS2) (HRASP)                     | 233    |
| Q8N1C3    | GBRG1_HUMAN | GABRG1      | –                | by similarity | Gamma-aminobutyric acid receptor subunit gamma-1 (GABA(A) receptor subunit gamma-1)                                                                                                 | GABRG1                                   | 465    |
| P18507    | GBRG2_HUMAN | GABRG2      | –                | by similarity | Gamma-aminobutyric acid receptor subunit gamma-2 (GABA(A) receptor subunit gamma-2)                                                                                                 | GABRG2                                   | 467    |
| Q99928    | GBRG3_HUMAN | GABRG3      | –                | by similarity | Gamma-aminobutyric acid receptor subunit gamma-3 (GABA(A) receptor subunit gamma-3)                                                                                                 | GABRG3                                   | 467    |
| P47211    | GALR1_HUMAN | GALR1       | 320              | by similarity | Galanin receptor type 1 (GAL1-R) (GALR1)                                                                                                                                            | GALR1 (GALNR) (GALNR1)                   | 349    |
| O60755    | GALR3_HUMAN | GALR3       | 308              | by similarity | Galanin receptor type 3 (GAL3-R) (GALR3)                                                                                                                                            | GALR3 (GALNR3)                           | 368    |

| Accession | Entry name  | Gene symbol | Site     | Evidence      | Protein names                                                                                                                                                                                                      | Genes                                                  | Length |
|-----------|-------------|-------------|----------|---------------|--------------------------------------------------------------------------------------------------------------------------------------------------------------------------------------------------------------------|--------------------------------------------------------|--------|
| P63096    | GNAI1_HUMAN | GNAI1       | 3        | by similarity | Guanine nucleotide-binding protein G(i), alpha-1 subunit (Adenylylate cyclase-inhibiting G alpha protein)                                                                                                          | GNAI1                                                  | 354    |
| P04899    | GNAI2_HUMAN | GNAI2       | 3        | by similarity | Guanine nucleotide-binding protein G(i), alpha-2 subunit (Adenylylate cyclase-inhibiting G alpha protein)                                                                                                          | GNAI2 (GNAI2B)                                         | 355    |
| P08754    | GNAI3_HUMAN | GNAI3       | 3        | by similarity | Guanine nucleotide-binding protein G(k) subunit alpha (G(i) alpha-3)                                                                                                                                               | GNAI3                                                  | 354    |
| P38405    | GNAL_HUMAN  | GNAL        | 3        | by similarity | Guanine nucleotide-binding protein G(olf) subunit alpha (Adenylylate cyclase-stimulating G alpha protein, olfactory type)                                                                                          | GNAL                                                   | 381    |
| P09471    | GNAO_HUMAN  | GNAO1       | 3        | by similarity | Guanine nucleotide-binding protein G(o) subunit alpha                                                                                                                                                              | GNAO1                                                  | 354    |
| P63092    | GNAS2_HUMAN | GNAS        | 3        | by similarity | Guanine nucleotide-binding protein G(s) subunit alpha isoforms short (Adenylylate cyclase-stimulating G alpha protein)                                                                                             | GNAS (GNAS1) (GSP)                                     | 394    |
| Q2TAP0    | GOG7B_HUMAN | GOLGA7B     | 78/81    | by similarity | Golgin subfamily A member 7B                                                                                                                                                                                       | GOLGA7B (C10orf132) (C10orf133)                        | 167    |
| P47775    | GPR12_HUMAN | GPR12       | 317      | by similarity | Probable G-protein coupled receptor 12                                                                                                                                                                             | GPR12                                                  | 334    |
| P46089    | GPR3_HUMAN  | GPR3        | 313      | by similarity | Probable G-protein coupled receptor 3 (ACCA orphan receptor)                                                                                                                                                       | GPR3 (ACCA)                                            | 330    |
| P46095    | GPR6_HUMAN  | GPR6        | 345      | by similarity | Sphingosine 1-phosphate receptor GPR6 (G-protein coupled receptor 6)                                                                                                                                               | GPR6                                                   | 362    |
| Q7Z2K8    | GRIN1_HUMAN | GPRIN1      | 999/1000 | by similarity | G protein-regulated inducer of neurite outgrowth 1                                                                                                                                                                 | GPRIN1 (KIAA1893)                                      | 1008   |
| P42261    | GRIA1_HUMAN | GRIA1       | 603/829  | by similarity | Glutamate receptor 1 (GluR-1) (GluR-A) (GluR-K1) (Glutamate receptor ionotropic, AMPA 1) (AMPA-selective glutamate receptor 1)                                                                                     | GRIA1 (GLUH1) (GLUR1)                                  | 906    |
| P42262    | GRIA2_HUMAN | GRIA2       | 610/836  | by similarity | Glutamate receptor 2 (GluR-2) (GluR-B) (GluR-K2) (Glutamate receptor ionotropic, AMPA 2) (AMPA-selective glutamate receptor 2)                                                                                     | GRIA2 (GLUR2)                                          | 883    |
| P42263    | GRIA3_HUMAN | GRIA3       | 621/847  | by similarity | Glutamate receptor 3 (GluR-3) (GluR-C) (GluR-K3) (Glutamate receptor ionotropic, AMPA 3) (AMPA-selective glutamate receptor 3)                                                                                     | GRIA3 (GLUR3) (GLURC)                                  | 894    |
| P48058    | GRIA4_HUMAN | GRIA4       | 611/837  | by similarity | Glutamate receptor 4 (GluR-4) (GluR4) (GluR-D) (Glutamate receptor ionotropic, AMPA 4) (AMPA-selective glutamate receptor 4)                                                                                       | GRIA4 (GLUR4)                                          | 902    |
| P30550    | GRPR_HUMAN  | GRPR        | 339      | by similarity | Gastrin-releasing peptide receptor (GRP-R) (GRP-preferring bombesin receptor)                                                                                                                                      | GRPR                                                   | 384    |
| P08631    | HCK_HUMAN   | HCK         | 3        | by similarity | Tyrosine-protein kinase HCK (2.7.10.2) (Hemopoietic cell kinase) (p59-HCK/p60-HCK)                                                                                                                                 | HCK                                                    | 526    |
| P35367    | HRH1_HUMAN  | HRH1        | 445      | potential     | Histamine H1 receptor                                                                                                                                                                                              | HRH1                                                   | 487    |
| P25021    | HRH2_HUMAN  | HRH2        | 305      | by similarity | Histamine H2 receptor (H2R) (Gastric receptor 1)                                                                                                                                                                   | HRH2                                                   | 359    |
| Q9H3N8    | HRH4_HUMAN  | HRH4        | 374      | potential     | Histamine H4 receptor (HH4R) (G-protein coupled receptor 105) (GPRv53) (SP9144) (AXOR35) (Pfi-013)                                                                                                                 | HRH4 (GPCR105)                                         | 390    |
| P28222    | 5HT1B_HUMAN | HTR1B       | 388      | potential     | 5-hydroxytryptamine receptor 1B (5-HT-1D-beta) (5-HT-1B) (5-HT1B) (Serotonin receptor 1B) (Serotonin 1D beta receptor) (S12)                                                                                       | HTR1B (HTR1DB)                                         | 390    |
| P41595    | 5HT2B_HUMAN | HTR2B       | 397      | potential     | 5-hydroxytryptamine receptor 2B (5-HT-2B) (Serotonin receptor 2B)                                                                                                                                                  | HTR2B                                                  | 481    |
| Q13639    | 5HT4R_HUMAN | HTR4        | 329      | by similarity | 5-hydroxytryptamine receptor 4 (5-HT-4) (5-HT4) (Serotonin receptor 4)                                                                                                                                             | HTR4                                                   | 388    |
| P34969    | 5HT7R_HUMAN | HTR7        | 401      | potential     | 5-hydroxytryptamine receptor 7 (5-HT-7) (5HT7) (5-HT-X) (Serotonin receptor 7)                                                                                                                                     | HTR7                                                   | 479    |
| Q16322    | KCA10_HUMAN | KCNA10      | 293      | potential     | Potassium voltage-gated channel subfamily A member 10 (Voltage-gated potassium channel subunit Kv1.8)                                                                                                              | KCNA10                                                 | 511    |
| P16389    | KCNA2_HUMAN | KCNA2       | 244      | potential     | Potassium voltage-gated channel subfamily A member 2 (Voltage-gated potassium channel subunit Kv1.2) (HBK5) (NGK1) (HUKIV)                                                                                         | KCNA2                                                  | 499    |
| P22001    | KCNA3_HUMAN | KCNA3       | 265      | potential     | Potassium voltage-gated channel subfamily A member 3 (Voltage-gated potassium channel subunit Kv1.3) (HPCN3) (HGK5) (HuKIII) (HLK3)                                                                                | KCNA3 (HGK5)                                           | 523    |
| P22460    | KCNA5_HUMAN | KCNA5       | 346      | potential     | Potassium voltage-gated channel subfamily A member 5 (Voltage-gated potassium channel subunit Kv1.5) (HK2) (HPCN1)                                                                                                 | KCNA5                                                  | 613    |
| P17658    | KCNA6_HUMAN | KCNA6       | 285      | potential     | Potassium voltage-gated channel subfamily A member 6 (Voltage-gated potassium channel subunit Kv1.6) (HBK2)                                                                                                        | KCNA6                                                  | 529    |
| Q96RP8    | KCNA7_HUMAN | KCNA7       | 231      | potential     | Potassium voltage-gated channel subfamily A member 7 (Voltage-gated potassium channel subunit Kv1.7)                                                                                                               | KCNA7                                                  | 456    |
| Q9NS61    | KCIP2_HUMAN | KCNIP2      | 45/46    | by similarity | Kv channel-interacting protein 2 (KCHIP2) (A-type potassium channel modulatory protein 2) (Potassium channel-interacting protein 2) (Cardiac voltage-gated potassium channel modulatory subunit)                   | KCNIP2 (KCHIP2)                                        | 270    |
| Q9GZY6    | NTAL_HUMAN  | LAT2        | 25/28    | probable      | Linker for activation of T-cells family member 2 (Non-T-cell activation linker) (Linker for activation of B-cells) (Membrane-associated adapter molecule) (Williams-Beuren syndrome chromosomal region 15 protein) | LAT2 (LAB) (NTAL) (WBS15) (WBSCR15) (WBSCR5) (HSPC046) | 243    |
| Q9H400    | LIME1_HUMAN | LIME1       | 28/31    | probable      | Lck-interacting transmembrane adapter 1 (Lck-interacting membrane protein) (Lck-interacting molecule)                                                                                                              | LIME1 (LIME) (LP8067)                                  | 295    |
| Q92633    | LPAR1_HUMAN | LPAR1       | 327      | by similarity | Lysophosphatidic acid receptor 1 (LPA receptor 1) (LPA-1) (Lysophosphatidic acid receptor Edg-2)                                                                                                                   | LPAR1 (EDG2) (LPA1)                                    | 364    |
| Q9HBW0    | LPAR2_HUMAN | LPAR2       | 311      | by similarity | Lysophosphatidic acid receptor 2 (LPA receptor 2) (LPA-2) (Lysophosphatidic acid receptor Edg-4)                                                                                                                   | LPAR2 (EDG4) (LPA2)                                    | 351    |
| Q9UBY5    | LPAR3_HUMAN | LAPR3       | 309      | by similarity | Lysophosphatidic acid receptor 3 (LPA receptor 3) (LPA-3) (Lysophosphatidic acid receptor Edg-7)                                                                                                                   | LPAR3 (EDG7) (LPA3)                                    | 353    |
| P07948    | LYN_HUMAN   | LYN         | 3        | by similarity | Tyrosine-protein kinase Lyn                                                                                                                                                                                        | LYN                                                    | 512    |
| P20916    | MAG_HUMAN   | MAG         | 531      | by similarity | Myelin-associated glycoprotein (Siglec-4a)                                                                                                                                                                         | MAG (GMA)                                              | 626    |
| Q96JE9    | MAP6_HUMAN  | MAP6        | 5/10/11  | by similarity | Microtubule-associated protein 6 (MAP-6) (Stable tubule-only polypeptide) (STOP)                                                                                                                                   | MAP6 (KIAA1878)                                        | 813    |
| Q01726    | MSHR_HUMAN  | MC1R        | 315      | potential     | Melanocyte-stimulating hormone receptor (MSH-R) (Melanotropin receptor) (Melanocortin receptor 1) (MC1-R)                                                                                                          | MC1R (MSHR)                                            | 317    |

| Accession | Entry name  | Gene symbol | Site               | Evidence      | Protein names                                                                                                                                                                                                                                                                                     | Genes                          | Length |
|-----------|-------------|-------------|--------------------|---------------|---------------------------------------------------------------------------------------------------------------------------------------------------------------------------------------------------------------------------------------------------------------------------------------------------|--------------------------------|--------|
| Q01718    | ACTHR_HUMAN | MC2R        | 293                | potential     | Adrenocorticotrophic hormone receptor (ACTH receptor) (ACTH-R) (Adrenocorticotropin receptor) (Melanocortin receptor 2) (MC2-R)                                                                                                                                                                   | MC2R (ACTHR)                   | 297    |
| P41968    | MC3R_HUMAN  | MC3R        | 352                | potential     | Melanocortin receptor 3 (MC3-R)                                                                                                                                                                                                                                                                   | MC3R                           | 360    |
| P32245    | MC4R_HUMAN  | MC4R        | 318                | potential     | Melanocortin receptor 4 (MC4-R)                                                                                                                                                                                                                                                                   | MC4R                           | 332    |
| P33032    | MC5R_HUMAN  | MC5R        | 311/312            | potential     | Melanocortin receptor 5 (MC5-R) (MC-2)                                                                                                                                                                                                                                                            | MC5R                           | 325    |
| P28336    | NMBR_HUMAN  | NMBR        | 341                | by similarity | Neuromedin-B receptor (NMB-R) (Neuromedin-B-preferring bombesin receptor)                                                                                                                                                                                                                         | NMBR                           | 390    |
| P48146    | NPBW2_HUMAN | NPBWR2      | –                  | by similarity | Neuropeptides B/W receptor type 2 (G-protein coupled receptor 8)                                                                                                                                                                                                                                  | NPBWR2 (GPR8)                  | 333    |
| Q9NP85    | PODO_HUMAN  | NPHS2       | 101                | by similarity | Podocin                                                                                                                                                                                                                                                                                           | NPHS2                          | 383    |
| P25929    | NPY1R_HUMAN | NPY1R       | 338                | by similarity | Neuropeptide Y receptor type 1 (NPY1-R)                                                                                                                                                                                                                                                           | NPY1R (NPYR) (NPYY1)           | 384    |
| P49146    | NPY2R_HUMAN | NPY2R       | 342                | by similarity | Neuropeptide Y receptor type 2 (NPY-Y2 receptor) (NPY2-R)                                                                                                                                                                                                                                         | NPY2R                          | 381    |
| Q15761    | NPY5R_HUMAN | NPY5R       | 452                | potential     | Neuropeptide Y receptor type 5 (NPY5-R) (NPY-Y5 receptor) (NPYY5) (Y5 receptor)                                                                                                                                                                                                                   | NPY5R (NPYR5)                  | 455    |
| P30989    | NTR1_HUMAN  | NTSR1       | 383                | potential     | Neurotensin receptor type 1 (NT-R-1) (High-affinity levocabastine-insensitive neurotensin receptor) (NTRH)                                                                                                                                                                                        | NTSR1 (NTRR)                   | 418    |
| O95665    | NTR2_HUMAN  | NTSR2       | 377                | potential     | Neurotensin receptor type 2 (NTR2 receptor) (NT-R-2) (Levocabastine-sensitive neurotensin receptor)                                                                                                                                                                                               | NTSR2                          | 410    |
| Q9HIY3    | OPN3_HUMAN  | OPN3        | 325                | by similarity | Opsin-3 (Encephalopsin) (Panopsin)                                                                                                                                                                                                                                                                | OPN3 (ECPN)                    | 402    |
| Q6U736    | OPN5_HUMAN  | OPN5        | 315/316            | potential     | Opsin-5 (Neuropsin) (G-protein coupled receptor 136) (G-protein coupled receptor PGR12) (Transmembrane protein 13)                                                                                                                                                                                | OPN5 (GPR136) (PGR12) (TMEM13) | 354    |
| P41143    | OPRD_HUMAN  | OPRD1       | 333                | potential     | Delta-type opioid receptor (DOR-1)                                                                                                                                                                                                                                                                | OPRD1 (OPRD)                   | 372    |
| P41145    | OPRK_HUMAN  | OPRK1       | 345                | potential     | Kappa-type opioid receptor (KOR-1)                                                                                                                                                                                                                                                                | OPRK1 (OPRK)                   | 380    |
| P41146    | OPRX_HUMAN  | OPRL1       | 334                | potential     | Nociceptin receptor (Orphanin FQ receptor) (Kappa-type 3 opioid receptor) (KOR-3)                                                                                                                                                                                                                 | OPRL1 (OOR) (ORL1)             | 370    |
| P35372    | OPRM_HUMAN  | OPRM1       | 353                | potential     | Mu-type opioid receptor (MOR-1)                                                                                                                                                                                                                                                                   | OPRM1 (MOR1)                   | 400    |
| P43657    | P2RY5_HUMAN | P2RY5       | 284                | by similarity | Oleoyl-L-alpha-lysophosphatidic acid receptor (P2Y purinoceptor 5) (P2Y5) (Purinerger receptor 5) (RB intron encoded G-protein coupled receptor)                                                                                                                                                  | P2RY5                          | 344    |
| Q9NWQ8    | PAG1_HUMAN  | PAG1        | 37/40              | probable      | Phosphoprotein associated with glycosphingolipid-enriched microdomains 1 (Transmembrane adapter protein PAG) (Csk-binding protein) (Transmembrane phosphoprotein Cbp)                                                                                                                             | PAG1 (CBP) (PAG)               | 432    |
| O75781    | PALM_HUMAN  | PALM        | 381/383            | potential     | Paralemmin                                                                                                                                                                                                                                                                                        | PALM (KIAA0270)                | 387    |
| Q8IXS6    | PALM2_HUMAN | PALM2       | 373/375            | potential     | Paralemmin-2                                                                                                                                                                                                                                                                                      | PALM2                          | 379    |
| A6NDB9    | PALM3_HUMAN | PALM3       | 667/669            | potential     | Paralemmin-3                                                                                                                                                                                                                                                                                      | PALM3                          | 673    |
| Q13393    | PLD1_HUMAN  | PLD1        | 240/241            | by similarity | Phospholipase D1 (PLD 1) (hPLD1) (3.1.4.4) (Choline phosphatase 1) (Phosphatidylcholine-hydrolyzing phospholipase D1)                                                                                                                                                                             | PLD1                           | 1074   |
| P60201    | MYPR_HUMAN  | PLP1        | 6/7/10/109/139/141 | by similarity | Myelin proteolipid protein (PLP) (Lipophilin)                                                                                                                                                                                                                                                     | PLP1 (PLP)                     | 277    |
| O15162    | PLS1_HUMAN  | PLSCR1      | 234/237/239/240    | potential     | Phospholipid scramblase 1 (PL scramblase 1) (Ca(2+)-dependent phospholipid scramblase 1) (Erythrocyte phospholipid scramblase) (MmTRA1b)                                                                                                                                                          | PLSCR1                         | 318    |
| Q9NRY7    | PLS2_HUMAN  | PLSCR2      | 149/152/154        | probable      | Phospholipid scramblase 2 (PL scramblase 2) (Ca(2+)-dependent phospholipid scramblase 2)                                                                                                                                                                                                          | PLSCR2                         | 224    |
| Q9NRY6    | PLS3_HUMAN  | PLSCR3      | 211/214/216        | probable      | Phospholipid scramblase 3 (PL scramblase 3) (Ca(2+)-dependent phospholipid scramblase 3)                                                                                                                                                                                                          | PLSCR3                         | 295    |
| Q9NRQ2    | PLS4_HUMAN  | PLSCR4      | 250/255            | probable      | Phospholipid scramblase 4 (PL scramblase 4) (Ca(2+)-dependent phospholipid scramblase 4) (TRA1) (Cell growth-inhibiting gene 43 protein)                                                                                                                                                          | PLSCR4 (GIG43)                 | 329    |
| P50391    | NPY4R_HUMAN | PPYR1       | 340                | potential     | Neuropeptide Y receptor type 4 (NPY4-R) (Pancreatic polypeptide receptor 1) (PP1)                                                                                                                                                                                                                 | PPYR1 (NPY4R)                  | 375    |
| P43115    | PE2R3_HUMAN | PTGER3      | 308/311            | by similarity | Prostaglandin E2 receptor EP3 subtype (PGE receptor, EP3 subtype) (PGE2-R) (Prostanoid EP3 receptor)                                                                                                                                                                                              | PTGER3                         | 390    |
| P57729    | RAB38_HUMAN | RAB38       | 205                | potential     | Ras-related protein Rab-38 (Antigen NY-MEL-1)                                                                                                                                                                                                                                                     | RAB38                          | 211    |
| Q8WZ73    | RFFL_HUMAN  | RFFL        | –                  | by similarity | E3 ubiquitin-protein ligase rifyflin (6.3.2.-) (RING finger and FYVE-like domain-containing protein 1) (FYVE-RING finger protein Sakura) (Fring) (Caspases-8 and -10-associated RING finger protein 2) (CARP-2) (Caspase regulator CARP2) (RING finger protein 189) (RING finger protein 34-like) | RFFL (RNF189) (RNF34L)         | 363    |
| Q52LD8    | RFTN2_HUMAN | RFTN2       | 3                  | by similarity | Raftlin-2 (Raft-linking protein 2)                                                                                                                                                                                                                                                                | RFTN2 (C2orf11)                | 501    |
| Q9UGC6    | RGS17_HUMAN | RGS17       | 28-40 poly-Cys     | by similarity | Regulator of G-protein signaling 17                                                                                                                                                                                                                                                               | RGS17                          | 210    |
| O76081    | RGS20_HUMAN | RGS20       | 208-220 poly-Cys   | by similarity | Regulator of G-protein signaling 20 (RGS20) (Regulator of Gz-selective protein signaling 1) (Gz-selective GTPase-activating protein) (G(z)GAP)                                                                                                                                                    | RGS20 (RGSZ1) (ZGAP1)          | 388    |
| P49802    | RGS7_HUMAN  | RGS7        | –                  | by similarity | Regulator of G-protein signaling 7                                                                                                                                                                                                                                                                | RGS7                           | 495    |
| Q6MZT1    | R7BP_HUMAN  | RGS7BP      | 252/253            | by similarity | Regulator of G-protein signaling 7-binding protein (R7 family-binding protein)                                                                                                                                                                                                                    | RGS7BP (R7BP)                  | 257    |
| Q96L33    | RHOV_HUMAN  | RHOV        | 234                | by similarity | Rho-related GTP-binding protein RhoV (Wnt-1 responsive Cdc42 homolog 2) (WRCH-2) (CDC42-like GTPase 2) (GTP-binding protein-like 2) (Rho GTPase-like protein ARHV)                                                                                                                                | RHOV (ARHV) (WRCH2)            | 236    |
| Q16518    | RPE65_HUMAN | RPE65       | 231, 329, 330      | by similarity | Retinal pigment epithelium-specific 65 kDa protein                                                                                                                                                                                                                                                | RPE65                          | 533    |

| Accession | Entry name  | Gene symbol | Site           | Evidence      | Protein names                                                                                                                              | Genes                                | Length |
|-----------|-------------|-------------|----------------|---------------|--------------------------------------------------------------------------------------------------------------------------------------------|--------------------------------------|--------|
| P21453    | S1PR1_HUMAN | S1PR1       | 328            | by similarity | Sphingosine 1-phosphate receptor 1 (S1P receptor 1) (S1P1) (Sphingosine 1-phosphate receptor Edg-1) (S1P receptor Edg-1) (E                | S1PR1 (CHEDG1) (EDG1)                | 382    |
| O95136    | S1PR2_HUMAN | S1PR2       | 305            | by similarity | Sphingosine 1-phosphate receptor 2 (S1P receptor 2) (S1P2) (Sphingosine 1-phosphate receptor Edg-5) (S1P receptor Edg-5) (E                | S1PR2 (EDG5)                         | 353    |
| O95977    | S1PR4_HUMAN | S1PR4       | 323            | by similarity | Sphingosine 1-phosphate receptor 4 (S1P receptor 4) (S1P4) (Sphingosine 1-phosphate receptor Edg-6) (S1P receptor Edg-6) (E                | S1PR4 (EDG6)                         | 384    |
| Q9H228    | S1PR5_HUMAN | S1PR5       | 323            | by similarity | Sphingosine 1-phosphate receptor 5 (S1P receptor 5) (S1P5) (Sphingosine 1-phosphate receptor Edg-8) (S1P receptor Edg-8) (E                | S1PR5 (EDG8)                         | 398    |
| P04920    | B3A2_HUMAN  | SLC4A2      | 1173           | by similarity | Anion exchange protein 2 (AE2 anion exchanger) (Non-erythroid band 3-like protein) (BND3L) (Solute carrier family 4 member 2)              | SLC4A2 (AE2) (EPB3L1) (HKB3) (MPB3L) | 1241   |
| P48751    | B3A3_HUMAN  | SLC4A3      | 1165           | by similarity | Anion exchange protein 3 (Neuronal band 3-like protein) (Solute carrier family 4 member 3) (Cardiac/brain band 3-like protein) (CAE3/BAE3) | SLC4A3 (AE3)                         | 1232   |
| P30872    | SSR1_HUMAN  | SSTR1       | 329            | potential     | Somatostatin receptor type 1 (SS1R) (SRIF-2)                                                                                               | SSTR1                                | 391    |
| P30874    | SSR2_HUMAN  | SSTR2       | 328            | potential     | Somatostatin receptor type 2 (SS2R) (SRIF-1)                                                                                               | SSTR2                                | 369    |
| P31391    | SSR4_HUMAN  | SSTR4       | 327            | potential     | Somatostatin receptor type 4 (SS4R)                                                                                                        | SSTR4                                | 388    |
| P35346    | SSR5_HUMAN  | SSTR5       | 320            | potential     | Somatostatin receptor type 5 (SS5R)                                                                                                        | SSTR5                                | 364    |
| P21579    | SYT1_HUMAN  | SYT1        | 75/76/78/80/83 | by similarity | Synaptotagmin-1 (Synaptotagmin I) (Syt1) (p65)                                                                                             | SYT1 (SVP65) (SYT)                   | 422    |
| P25103    | NK1R_HUMAN  | TACR1       | 322            | potential     | Substance-P receptor (SPR) (NK-1 receptor) (NK-1R) (Tachykinin receptor 1)                                                                 | TACR1 (NK1R) (TAC1R)                 | 407    |
| P21452    | NK2R_HUMAN  | TACR2       | 324            | potential     | Substance-K receptor (SKR) (Neurokinin A receptor) (NK-2 receptor) (NK-2R) (Tachykinin receptor 2)                                         | TACR2 (NK2R) (NKNAR) (TAC2R)         | 398    |
| P29371    | NK3R_HUMAN  | TACR3       | 374            | potential     | Neuromedin-K receptor (NKR) (Neurokinin B receptor) (NK-3 receptor) (NK-3R) (Tachykinin receptor 3)                                        | TACR3 (NK3R) (TAC3R)                 | 465    |
| P18206    | VINC_HUMAN  | VCL         | –              | by similarity | Vinculin (Metavinculin)                                                                                                                    | VCL                                  | 1134   |
| P56704    | WNT3A_HUMAN | WNT3A       | 77             | by similarity | Protein Wnt-3a                                                                                                                             | WNT3A                                | 352    |
| P41221    | WNT5A_HUMAN | WNT5A       | 104            | by similarity | Protein Wnt-5a                                                                                                                             | WNT5A                                | 380    |

**Note 1.** The putative S-acylation sites (see the 4th column) are included in the Uniprot database (<http://beta.uniprot.org>)
